# Supplementary material for: Furanosyl Oxocarbenium Ion Conformational Energy Landscape Maps as a Tool to Study the Glycosylation Stereoselectivity of 2‐Azidofuranoses, 2‐Fluorofuranoses and Methyl Furanosyl Uronates
Source: PubMed Central journal article supplement — Chemistry. 2019 Apr 17;25(29):7149–57. doi: 10.1002/chem.201900651 (PMC6563709; doi:10.1002/chem.201900651), 2019-04-17
Supplement: CHEM-25-7149-s001.pdf [file CHEM-25-7149-s001.pdf]

# CHEMISTRY

## A **European** Journal

### Supporting Information

#### **Furanosyl Oxocarbenium Ion Conformational Energy Landscape Maps as a Tool to Study the Glycosylation Stereoselectivity of 2-Azidofuranoses, 2-Fluorofuranoses and Methyl Furanosyl Uronates**

Stefan van der Vorm, Thomas Hansen, Erwin R. van Rijssel, Rolf Dekkers, Jerre M. Madern, Herman S. Overkleef, Dmitri V. Filippov, Gijsbert A. van der Marel, and Jeroen D. C. Codée<sup>\*[a]</sup>

chem\_201900651\_sm\_miscellaneous\_information.pdf

# Supporting Information

## Conformational Energy Landscapes as a tool to study the glycosylation stereoselectivity of 2-azidofuranoses, 2-fluorofuranoses, and methyl furanosyl urinates

Stefan van der Vorm, Thomas Hansen, Erwin R. van Rijssel, Rolf Dekkers, Jerre M. Madern, Dmitri V. Filippov, Herman S. Overkleef, Gijsbert A. van der Marel and Jeroen D. C. Codée

### Table of Contents

|                                                                          |     |
|--------------------------------------------------------------------------|-----|
| General experimental procedures                                          | S2  |
| Synthesis and spectroscopic data for building blocks <b>17-24, 29-55</b> | S2  |
| Synthesis and spectroscopic data for donors <b>1-12</b>                  | S10 |
| Synthesis and spectroscopic data for glycosylation products <b>65-81</b> | S14 |
| Computational data for oxocarbenium ions <b>82-97</b>                    | S18 |
| Conformational Energy Landscapes of individual rotamers                  |     |
| Energies and atomic coordinates of relevant, low-energy structures       |     |
| NMR spectra                                                              | S52 |

**General procedure for the synthesis furanosyl methyl uronates by TEMPO/BAIB oxidation and methylation (17-20).** The primary alcohol was dissolved in DCM/H<sub>2</sub>O (2/1, v/v, 0.17 M) and the mixture was cooled to 0°C. TEMPO (0.2 eq.) and BAIB (2.5 eq.) were added and the reaction mixture was stirred vigorously overnight. A 10 % aq. Na<sub>2</sub>O<sub>3</sub> solution was added and the mixture stirred for 15 min at room temperature. The mixture was diluted with 0.01 M aq. HCl and DCM and phase separated and the aqueous layer extracted three times with DCM. The combined DCM layers were washed with H<sub>2</sub>O and brine, dried (MgSO<sub>4</sub>), filtered and concentrated under reduced pressure. The crude carboxylic acid was dissolved in DMF (0.2 M) and K<sub>2</sub>CO<sub>3</sub> (3 eq.) and MeI (3 eq.) were added at 0°C. The reaction was stirred for 3 h and then quenched with AcOH (5 eq). The solution was diluted with H<sub>2</sub>O and extracted three times with Et<sub>2</sub>O. The combined organic layers were washed with sat. aq. NaHCO<sub>3</sub> and brine, dried with MgSO<sub>4</sub>, filtered, and concentrated under reduced pressure. The residue was purified by flash column chromatography (19/1 to 7/3) to give the uronic acid methyl ester.

**General procedure for the formation of 2-O-trifluoromethanesulfonyl-furanosides (29-32).** A 0.2M solution of the alcohol (1 eq.) in DCM was cooled to 0°C followed by the addition of pyridine (2 eq.) and Tf<sub>2</sub>O (1.2 eq.). After stirring for 40 min the reaction mixture was poured into cold 1 M aq. HCl and extracted twice with DCM. The combined organic layers were washed with cold H<sub>2</sub>O, cold sat. aq. NaHCO<sub>3</sub>, and brine. The organic layer was dried (Na<sub>2</sub>SO<sub>4</sub>), filtered, and concentrated under reduced pressure. After coevaporated with toluene the crude triflated furanoside was dissolved in the solvent required for the next synthetic step.

**General procedure for the inversion of 2-O-trifluoromethanesulfonyl-furanosides (33-40).** Conditions A: The triflate (1 eq.) was dissolved in *tert*-amyl alcohol (0.35 M) and CsF (4 eq.) was added. The reaction mixture was heated overnight at 90°C, followed by aqueous work up. Conditions B: The triflate (1 eq.) was dissolved in THF (0.2 M) and TBAF (1 M in THF, 2.5 eq.) was added at 0°C. The reaction mixture was allowed to reach room temperature and stirred overnight, followed by aqueous work up. Conditions C: The triflate (1 eq.) was dissolved in DMF (0.2 M) and NaN<sub>3</sub> (5 eq.) was added. The reaction mixture was heated for 2 h at 80°C, followed by aqueous work up. Work up conditons: the reaction mixture was diluted with H<sub>2</sub>O (volumex10) and extracted with Et<sub>2</sub>O three times. The combined organic layers were washed with H<sub>2</sub>O, sat. aq. NaHCO<sub>3</sub>, and brine. The organic layer was dried (MgSO<sub>4</sub>), filtered and concentrated *in vacuo*. Flash column chromatography (1/0 to 9/1 pentane/EtOAc) provided the target inverted furanosides as colourless oils.

**General procedure for the hydrolysis of methyl furanosides (21-24, 41-48).** Conditions A: The methyl glycoside was mixed with 80% aq. formic acid to a concentration of 0.05 M and stirred at 60-65°C for 6-64 h as mentioned for each experiment. After the reaction mixture was cooled to room temperature and transferred to a separatory funnel, it was diluted 5x with H<sub>2</sub>O and extracted three times with DCM. The combined DCM layers were washed with sat. aq. NaHCO<sub>3</sub> and brine, dried over MgSO<sub>4</sub>, filtered and concentrated *in vacuo*. The resulting residue was purified by flash column chromatography (pentane/EtOAc mixtures) to provide the target lactol as a mixture of anomers. Conditions B: The methyl glycoside was dissolved in 90% aq. TFA at 0°C and stirred for 4-8 h. The reaction was diluted with DCM and washed with H<sub>2</sub>O three times. The aqueous layers were extracted twice with DCM and the combined organic layers were washed with sat. aq. NaHCO<sub>3</sub> and brine. The organic layer was dried (MgSO<sub>4</sub>), filtered and concentrated under reduced pressure. The residu was purified by flash column chromatography (19/1 to 6/4 pentane/EtOAc) to provide the target lactol as a mixture of anomers.

**General procedure for the installation of the trifluoro-*N*-phenylacetimidoyl group (1-12).** Conditions A: The furanose lactol was dissolved in acetone/H<sub>2</sub>O (0.2 M, 9/1 v,v) and cooled to 0°C. Cs<sub>2</sub>CO<sub>3</sub> (1.1 eq.) and 2,2,2-trifluoro-*N*-phenylacetimidoyl chloride (0.95 eq.) were added and the reaction mixture stirred until TLC-analysis showed complete conversion (1-4 days). The reaction mixture was reduced in volume under reduced pressure and H<sub>2</sub>O was added. The aqueous phase was extracted twice with DCM and the combined organic layers were dried with Na<sub>2</sub>SO<sub>4</sub>, filtered, and concentrated under reduced pressure. Flash column chromatography (0-15% Et<sub>2</sub>O/pentane) of the residue provided the target imidate donors. Conditions B: The furanose lactol was dissolved in DCM (0.25 M) and cooled to 0°C. 2,2,2-Trifluoro-*N*-phenylacetimidoyl chloride (0.95 eq.) was added followed bu DBU (1 eq.). The reaction mixture was stirred for 1 h and then concentrated under reduced pressure. Flash column chromatography (1/0 to 85/15 pentane/Et<sub>2</sub>O) of the residue provided the target imidate donors.

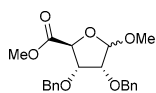

**Methyl (methyl 2,3-di-O-benzyl- $\alpha/\beta$ -D-ribofuranosyl uronate) (17).** The title compound was generated from **13**<sup>1</sup> (13.3 g, 38.7 mmol) by the general procedure for TEMPO/BAIB oxidation. Yield: 87% (12.5 g, 33.7 mmol) as a yellow oil. Rf: 0.73 (7/3 pentane/EtOAc). Spectroscopic data were in accord with those previously reported.<sup>2</sup> Data for the  $\beta$ -anomer: IR (thin film): 698, 739, 957, 1026, 1063, 1111, 1136, 1205, 1358, 1454, 1738, 1753, 2930, 3030; <sup>1</sup>H NMR (CDCl<sub>3</sub>, 500 MHz, HH-COSY, HH-NOESY, HSQC):  $\delta$  7.38 – 7.26 (m, 10H, CH<sub>arom</sub>), 4.97 (s, 1H, H-1), 4.68 – 4.62 (m, 3H, CH<sub>2</sub> Bn, H-4), 4.61 (d, 1H, *J* = 12.0 Hz, CHH Bn), 4.57 (d, 1H, *J* = 12.0 Hz, CHH Bn), 4.35 (dd, 1H, *J* = 6.4, 4.7 Hz, H-3), 3.85 (d, 1H, *J* = 4.6 Hz, H-2), 3.74 (s, 3H, CH<sub>3</sub> CO<sub>2</sub>Me), 3.38 (s, 3H, CH<sub>3</sub> OMe); <sup>13</sup>C-APT NMR (CDCl<sub>3</sub>, 126 MHz, HSQC):  $\delta$  172.0 (C=O), 137.6, 137.5 (C<sub>q</sub>), 128.5, 128.4, 128.0, 127.9, 127.9 (CH<sub>arom</sub>), 107.1 (C-1), 80.6 (C-3), 79.8 (C-2), 79.6 (C-4), 72.8, 72.7 (CH<sub>2</sub> Bn), 55.3 (CH<sub>3</sub> OMe), 52.3 (CH<sub>3</sub> CO<sub>2</sub>Me); <sup>13</sup>C HSQC-HECADE NMR (CDCl<sub>3</sub>, 126 MHz): <sup>2</sup>J<sub>C1,H2</sub>: +0.3 Hz, <sup>2</sup>J<sub>C2,H1</sub>: -0.6 Hz; HRMS: [M+NH<sub>4</sub>]<sup>+</sup> calcd for C<sub>21</sub>H<sub>28</sub>NO<sub>6</sub> 390.19111, found 390.19105.

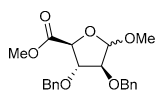

**Methyl (methyl 2,3-di-O-benzyl- $\alpha/\beta$ -D-arabinofuranosyl uronate) (18).** The title compound was generated from **14**<sup>3</sup> (28.2 g, 78.8 mmol) by the general procedure for TEMPO/BAIB oxidation. Yield: 70% (20.6 g, 55.3 mmol) as a yellow oil. Rf: 0.75 (7/3 pentane/EtOAc). IR (thin film): 698, 737, 1028, 1059, 1099, 1207, 1360, 1454, 1734, 1755, 2874, 2916, 2949, 3030. Data for the  $\alpha$ -anomer: <sup>1</sup>H NMR (CDCl<sub>3</sub>, 400 MHz, HH-COSY, HSQC):  $\delta$  7.44 – 7.21 (m, 10H, CH<sub>arom</sub>), 5.09 (s, 1H, H-1), 4.63 (d, 1H, *J* = 4.8 Hz, H-4), 4.67 – 4.54 (m, 2H, CH<sub>2</sub> Bn), 4.47 (d, 1H, *J* = 12.0 Hz, CHH Bn), 4.41 (d, 1H, *J* = 12.0 Hz, CHH Bn), 4.15 (dd, 1H, *J* = 4.8, 1.8 Hz, H-3), 3.96 (dd, 1H, *J* = 1.8, 0.8 Hz, H-2), 3.73 (s, 3H, CH<sub>3</sub> CO<sub>2</sub>Me), 3.41 (s, 3H, CH<sub>3</sub> OMe); <sup>13</sup>C-APT NMR (CDCl<sub>3</sub>, 101 MHz, HSQC):  $\delta$  170.6 (C=O), 137.2, 137.2 (C<sub>q</sub>), 128.4, 128.2, 128.0, 127.9, 127.9, 127.9 (CH<sub>arom</sub>), 108.0 (C-1), 86.5 (C-2), 84.9 (C-3), 80.9 (C-4), 72.1, 71.7 (CH<sub>2</sub> Bn), 55.5 (CH<sub>3</sub> OMe), 52.4 (CH<sub>3</sub> CO<sub>2</sub>Me); Data for the  $\beta$ -anomer: <sup>1</sup>H NMR (CDCl<sub>3</sub>, 400 MHz, HH-COSY, HSQC):  $\delta$  7.37 – 7.22 (m, 10H, CH<sub>arom</sub>), 4.76 (d, 1H, *J* = 4.2 Hz, H-1), 4.73 (d, 1H, *J* = 11.8 Hz, CHH Bn), 4.67 (d, 1H, *J* = 11.8 Hz, CHH Bn), 4.64 – 4.58 (m, 2H, CH<sub>2</sub> Bn), 4.53 (dd, 1H, *J* = 6.6, 4.9 Hz, H-3), 4.42 (d, 1H, *J* = 4.9 Hz, H-4), 4.01 (dd, 1H, *J* = 6.6, 4.2 Hz, H-2), 3.73 (s, 3H, CH<sub>3</sub> CO<sub>2</sub>Me), 3.42 (s, 3H, CH<sub>3</sub> OMe); <sup>13</sup>C-APT NMR (CDCl<sub>3</sub>, 101 MHz, HSQC):  $\delta$  171.5 (C=O), 137.7, 137.4 (C<sub>q</sub>), 128.4, 128.4, 128.3, 128.1, 127.9, 127.7 (CH<sub>arom</sub>), 102.3 (C-1), 83.8, 83.8 (C-2, C-3), 79.4 (C-4), 72.5, 72.5 (CH<sub>2</sub> Bn), 55.5 (CH<sub>3</sub> OMe), 52.2 (CH<sub>3</sub> CO<sub>2</sub>Me); HRMS: [M+NH<sub>4</sub>]<sup>+</sup> calcd for C<sub>21</sub>H<sub>28</sub>NO<sub>6</sub> 390.19111, found 390.19094.

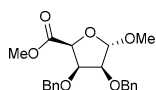

**Methyl (methyl 2,3-di-O-benzyl- $\alpha$ -D-lyxofuranosyl uronate) (19).** The title compound was generated from **15**<sup>4</sup> (9.91 g, 28.8 mmol) by the general procedure for TEMPO/BAIB oxidation. Yield: 89% (9.5 g, 25.5 mmol) as a white solid. Rf: 0.70 (7/3 pentane/EtOAc). m.p. 76–80 °C. [ $\alpha$ ]<sub>D</sub><sup>20</sup> = +29.7° (*c* = 0.92, CHCl<sub>3</sub>); IR (thin film): 698, 739, 1028, 1065, 1145, 1211, 1454, 1734, 1767, 2949; <sup>1</sup>H NMR (CDCl<sub>3</sub>, 500 MHz, HH-COSY, HSQC):  $\delta$  7.38 – 7.23 (m, 10H, CH<sub>arom</sub>), 5.23 (d, 1H, *J* = 3.6 Hz, H-1), 4.76 (d, 1H, *J* = 11.8 Hz, CHH Bn), 4.72 (d, 1H, *J* = 4.7 Hz, H-4), 4.69 (d, 1H, *J* = 12.0 Hz, CHH Bn), 4.63 (d, 1H, *J* = 12.0 Hz, CHH Bn), 4.59 (d, 1H, *J* = 11.8 Hz, CHH Bn), 4.35 (t, 1H, *J* = 4.7 Hz, H-3), 3.93 (dd, 1H, *J* = 4.6, 3.6 Hz, H-2), 3.72 (s, 3H, CH<sub>3</sub> CO<sub>2</sub>Me), 3.43 (s, 3H, CH<sub>3</sub> OMe); <sup>13</sup>C-APT NMR (CDCl<sub>3</sub>, 126 MHz, HSQC):  $\delta$  169.1 (C=O), 138.0, 137.8 (C<sub>q</sub>), 128.5, 128.4, 127.9, 127.9, 127.8, 127.8 (CH<sub>arom</sub>), 108.0 (C-1), 83.3 (C-2), 79.0 (C-3), 78.5 (C-4), 73.9, 72.8 (CH<sub>2</sub> Bn), 56.5 (CH<sub>3</sub> OMe), 52.3 (CH<sub>3</sub> CO<sub>2</sub>Me); <sup>13</sup>C HSQC-HECADE NMR (CDCl<sub>3</sub>, 126 MHz): <sup>2</sup>J<sub>C1,H2</sub> = -2.8 Hz, <sup>2</sup>J<sub>C2,H1</sub> = -1.6 Hz; HRMS: [M+H]<sup>+</sup> calcd for C<sub>21</sub>H<sub>25</sub>O<sub>6</sub> 373.16456, found 373.16471.

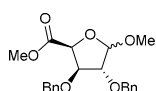

**Methyl (methyl 2,3-di-O-benzyl- $\alpha/\beta$ -D-xylofuranosyl uronate) (20).** The title compound was generated from **16**<sup>5</sup> (34.4 g, 100 mmol) by the general procedure for TEMPO/BAIB oxidation. Yield: 88% (30.8 g, 88.2 mmol) as a yellow oil. Rf: 0.65 (7/3 pentane/EtOAc). IR (thin film): 698, 739, 1063, 1119, 1207, 1454, 1738, 1765, 2916, 2949, 3030. Data for the  $\alpha$ -anomer: <sup>1</sup>H NMR (CDCl<sub>3</sub>, 400 MHz, HH-COSY, HSQC):  $\delta$  7.39 – 7.21 (m, 10H, CH<sub>arom</sub>), 4.94 (d, 1H, *J* = 4.3 Hz, H-1), 4.79 (d, 1H, *J* = 7.4 Hz, H-4), 4.64 – 4.57 (m, 4H, 2xCH<sub>2</sub> Bn), 4.47 (dd, 1H, *J* = 7.4, 6.2 Hz, H-3), 4.11 (dd, 1H, *J* = 6.2, 4.3 Hz, H-2), 3.73 (s, 3H, CH<sub>3</sub> CO<sub>2</sub>Me), 3.40 (s, 3H, CH<sub>3</sub> OMe); <sup>13</sup>C-APT NMR (CDCl<sub>3</sub>, 101 MHz, HSQC):  $\delta$  169.7 (C=O), 137.6, 137.4 (C<sub>q</sub>), 128.5, 128.4, 128.2, 128.1, 127.7, 127.5 (CH<sub>arom</sub>), 101.6 (C-1), 82.5 (C-2), 81.8 (C-3), 76.5 (C-4), 73.0, 72.9 (CH<sub>2</sub> Bn), 55.7 (OMe), 52.2 (CO<sub>2</sub>Me); Data for the  $\beta$ -anomer: <sup>1</sup>H NMR (CDCl<sub>3</sub>, 400 MHz, HH-COSY, HSQC):  $\delta$  7.40 – 7.23 (m, 10H, CH<sub>arom</sub>), 5.04 (s, 1H, H-1), 4.90 (d, 1H, *J* = 6.2 Hz, H-4), 4.61 – 4.56 (m, 1H, CHH Bn), 4.53 (d, 1H, *J* = 12.5 Hz, CHH Bn), 4.43 (d, 1H, *J* = 11.9 Hz, CHH Bn), 4.39 (d, 1H, *J* = 11.9 Hz, CHH Bn), 4.23 (dd, 1H, *J* = 6.2, 1.4 Hz, H-2), 3.98 – 3.97 (m, 1H, H-2), 3.77 (s, 3H, CH<sub>3</sub> CO<sub>2</sub>Me), 3.53 (s, 3H, CH<sub>3</sub> OMe); <sup>13</sup>C-APT NMR (CDCl<sub>3</sub>, 101 MHz, HSQC):  $\delta$  169.7 (C=O), 137.2, 137.2 (C<sub>q</sub>), 128.5, 128.5, 128.1, 128.0, 127.7, 127.5 (CH<sub>arom</sub>), 108.8 (C-1), 85.1 (C-2), 81.2 (C-3), 81.1 (C-4), 72.7, 71.9 (CH<sub>2</sub> Bn), 56.0 (OMe), 52.1 (CO<sub>2</sub>Me); HRMS: [M+H]<sup>+</sup> calcd for C<sub>21</sub>H<sub>25</sub>O<sub>6</sub> 373.16456, found 373.16448.

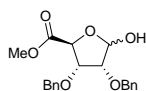

**Methyl (2,3-di-O-benzyl- $\alpha/\beta$ -D-ribofuranosyl uronate) (21).** The title compound was generated from **17** (8.33 g, 22.38 mmol) by the general procedure for methyl furanoside hydrolysis, conditions B (7.5 h). Yield: 73%  $\alpha:\beta$  = 1.1:1 (5.87 g, 16.4) as a colourless oil. Rf: 0.54 (7/3 pentane/EtOAc). IR (thin film): 698, 739, 1026, 1070, 1209, 1358, 1454, 1740, 2870, 2951, 3030, 3441; Data for the  $\alpha$ -anomer: <sup>1</sup>H NMR (CDCl<sub>3</sub>, 400 MHz, HH-COSY, HSQC):  $\delta$  7.40 – 7.25 (m, 10H, CH<sub>arom</sub>), 5.45 (dd, 1H, *J* = 11.1, 4.3 Hz, H-1), 4.82 – 4.44 (m, 5H, 2xCH<sub>2</sub>Bn, H-4), 4.19 (d, 1H, *J* = 11.5 Hz, OH), 4.16 – 4.06 (m, 1H, H-3), 3.89 (d, 1H, *J* = 4.5 Hz, H-2), 3.71 (d, 3H, *J* = 4.2 Hz, CH<sub>3</sub> CO<sub>2</sub>Me); <sup>13</sup>C-APT NMR (CDCl<sub>3</sub>, 101 MHz, HSQC):  $\delta$  170.6 (C=O), 137.11, 136.74 (C<sub>q</sub>), 128.5 – 127.9 (CH<sub>arom</sub>), 96.8 (C-1), 80.2 (C-2), 79.1 (C-4), 77.5 (C-3), 72.5, 72.4 (CH<sub>2</sub>Bn), 52.6 (CH<sub>3</sub> CO<sub>2</sub>Me); Data for the  $\beta$ -anomer: <sup>1</sup>H NMR (CDCl<sub>3</sub>, 400 MHz, HH-COSY, HSQC):  $\delta$  7.40 – 7.25 (m, 10H, CH<sub>arom</sub>), 5.55 (s, 1H, H-1), 5.07 – 4.88 (m, 1H, OH), 4.78, (d, *J* = 1.4 Hz, H-4), 4.82 – 4.44 (m, 4H, 2xCH<sub>2</sub>Bn), 4.38 (dd, 1H, *J* = 6.5, 4.5 Hz, H-3), 3.93 (t, 1H, *J* = 4.6 Hz, H-2), 3.71 (d, 3H, *J* = 4.2 Hz, CH<sub>3</sub> CO<sub>2</sub>Me); <sup>13</sup>C-APT NMR (CDCl<sub>3</sub>, 101 MHz, HSQC):  $\delta$  173.3 (C=O), 137.6, 137.4 (C<sub>q</sub>), 128.5 – 127.9 (CH<sub>arom</sub>), 101.1 (C-1), 80.4 (C-3), 80.2 (C-2), 79.7 (C-4), 73.0, 72.7 (CH<sub>2</sub>Bn), 52.6 (CH<sub>3</sub> CO<sub>2</sub>Me); HRMS: [M+Na]<sup>+</sup> calcd for C<sub>20</sub>H<sub>22</sub>O<sub>6</sub>Na 381.13086, found 381.13084.

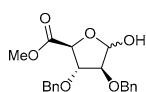

**Methyl (2,3-di-O-benzyl- $\alpha/\beta$ -D-arabinofuranosyl uronate) (22).** The title compound was generated from **18** (11.9 g, 32 mmol) by the general procedure for methyl furanoside hydrolysis, conditions B (8 h). Yield: 60%  $\alpha:\beta$  = 2:1 (6.87 g, 19.2 mmol) as a yellow oil. Rf: 0.38 (7/3 pentane/EtOAc). IR (thin film): 698, 739, 1028, 1076, 1090, 1207, 1454, 1740. Data for the  $\alpha$ -anomer: <sup>1</sup>H NMR (CDCl<sub>3</sub>, 400 MHz, HH-COSY, HSQC):  $\delta$  7.40 – 7.22 (m, 10H, CH<sub>arom</sub>), 5.51 (d, 1H, *J* = 10.2 Hz, H-1), 4.86 (d, 1H, *J* = 1.7 Hz, H-4), 4.70 (d, 1H, *J* = 11.8 Hz, CHH Bn), 4.59 (d, 1H, *J* = 11.8 Hz, CHH Bn), 4.53 (d, 1H, *J* = 11.7 Hz, CHH Bn), 4.46 (d, 1H, *J* = 11.7 Hz, CHH Bn), 4.38 – 4.34 (m, 1H, H-3), 3.94 (d, 1H, *J* = 0.9 Hz,

H-2), 3.69 (s, 3H, CH<sub>3</sub> CO<sub>2</sub>Me), 3.41 (d, 1H, *J* = 10.3 Hz, OH); <sup>13</sup>C-APT NMR (CDCl<sub>3</sub>, 101 MHz, HSQC): δ 170.5 (C=O), 137.1, 136.7 (C<sub>q</sub>), 128.6, 128.5, 128.4, 128.0, 128.0, 127.7 (CH<sub>arom</sub>), 102.1 (C-1), 84.6 (C-2), 84.1 (C-3), 81.1 (C-4), 72.3, 71.6 (CH<sub>2</sub> Bn), 52.4 (CH<sub>3</sub> CO<sub>2</sub>Me); Data for the β-anomer: <sup>1</sup>H NMR (CDCl<sub>3</sub>, 400 MHz, HH-COSY, HSQC): δ 7.40 – 7.22 (m, 10H, CH<sub>arom</sub>), 5.55 (dd, 1H, *J* = 10.0, 3.9 Hz, H-1), 4.66 (d, 1H, *J* = 11.9 Hz, CHH Bn), 4.57 – 4.54 (m, 1H, CHH Bn), 4.53 (d, 1H, *J* = 2.2 Hz, H-4), 4.38 – 4.34 (m, 1H, H-3), 3.91 (dd, 1H, *J* = 3.9, 2.7 Hz, H-2), 3.85 (d, 1H, *J* = 10.0 Hz, OH), 3.72 (s, 3H, CH<sub>3</sub> CO<sub>2</sub>Me); <sup>13</sup>C-APT NMR (CDCl<sub>3</sub>, 101 MHz, HSQC): δ 171.8 (C=O), 137.2, 136.9 (C<sub>q</sub>), 128.5, 128.2, 128.2, 128.0, 127.9, 127.8 (CH<sub>arom</sub>), 98.2 (C-1), 84.2 (C-3), 81.5 (C-2), 79.7 (C-4), 72.7, 72.1 (CH<sub>2</sub> Bn), 52.5 (CH<sub>3</sub> CO<sub>2</sub>Me); HRMS: [M+NH<sub>4</sub>]<sup>+</sup> calcd for C<sub>20</sub>H<sub>26</sub>NO<sub>6</sub> 376.17546, found 376.17566.

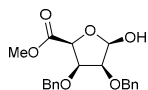

**Methyl (2,3-di-O-benzyl-β-D-lyxofuranosyl uronate) (23).** The title compound was generated from **19** (1.0 g, 2.7 mmol) by the general procedure for methyl furanoside hydrolysis, conditions B (6 h). Yield: 85% β only (181 mg, 2.28 mmol) as a white solid. Rf: 0.35 (1/1 pentane/EtOAc). IR (thin film): 698, 739, 1026, 1065, 1141, 1211, 1360, 1437, 1454, 1738, 1763, 2874, 2951, 3466. <sup>1</sup>H NMR (CDCl<sub>3</sub>, 400 MHz, HH-COSY, HSQC): δ 7.43 – 7.22 (m, 10H, CH<sub>arom</sub>), 5.40 (dd, 1H, *J* = 12.6, 4.3 Hz, H-1), 4.85 (d, 1H, *J* = 11.2 Hz, CHH Bn), 4.80 (d, 1H, *J* = 11.6 Hz, CHH Bn), 4.63 – 4.59 (m, 3H, 2xCHH Bn, H-4), 4.37 (t, 1H, *J* = 4.4 Hz, H-3), 4.33 (d, 1H, *J* = 12.6 Hz, OH), 3.91 (t, 1H, *J* = 4.2 Hz, H-2), 3.73 (s, 3H, CH<sub>3</sub> OMe); <sup>13</sup>C-APT NMR (CDCl<sub>3</sub>, 101 MHz, HSQC): δ 169.5 (C=O), 137.3, 137.2 (C<sub>q</sub>), 128.7, 128.5, 128.2, 128.2, 128.1, 127.9 (CH<sub>arom</sub>), 97.0 (C-1), 78.8 (C-4), 78.5, 78.4 (C-2, C-3), 74.8, 72.2 (CH<sub>2</sub> Bn), 52.4 (CH<sub>3</sub> CO<sub>2</sub>Me); HRMS: [M+Na]<sup>+</sup> calcd for C<sub>20</sub>H<sub>22</sub>O<sub>6</sub>Na 376.17546, found 376.17580.

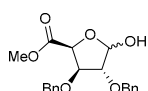

**Methyl (2,3-di-O-benzyl-α/β-D-xylofuranosyl uronate) (24).** The title compound was generated from **20** (17.7 g, 47.6 mmol) by the general procedure for methyl furanoside hydrolysis, conditions B (4 h). Yield: 90% α:β = 1:1.3 (15.3 mg, 42.7 mmol) as a light yellow oil. Rf: 0.2 (8/2 pentane/EtOAc). IR (thin film): 698, 739, 1028, 1061, 1072, 1209, 1366, 1437, 1454, 1738, 1759, 2951, 3030, 3430; <sup>1</sup>H NMR (CDCl<sub>3</sub>, 400 MHz, HH-COSY, HSQC): δ 7.45 – 7.21 (m, 17.5H, CH<sub>arom</sub>), 5.65 (dd, 0.75H, *J* = 10.1, 4.0 Hz, H-1<sub>α</sub>), 5.39 (d, 1H, *J* = 11.3 Hz, H-1<sub>β</sub>), 4.90 (d, 1H, *J* = 5.9 Hz, H-4<sub>β</sub>), 4.83 (d, 0.75H, *J* = 5.2 Hz, H-4<sub>α</sub>), 4.61 – 4.49 (m, 7H, CH<sub>2</sub> Bn), 4.28 (ddd, 1H, *J* = 5.9, 2.4, 0.8 Hz, H-3<sub>β</sub>), 4.25 (ddd, 1H, *J* = 5.2, 2.5, 0.4 Hz, H-3<sub>α</sub>), 4.00 (d, 1H, *J* = 11.6 Hz, 1-OH<sub>β</sub>), 4.00 (dt, 1H, *J* = 2.4, 0.8 Hz, H-2<sub>β</sub>), 3.94 (dd, 0.75H, *J* = 3.9, 2.6 Hz, H-2<sub>α</sub>), 3.84 (d, 0.75H, *J* = 10.1 Hz, 1-OH<sub>α</sub>), 3.77 (s, 3H, CH<sub>3</sub> CO<sub>2</sub>Me<sub>β</sub>), 3.74 (s, 2.25H, CH<sub>3</sub> CO<sub>2</sub>Me<sub>α</sub>); <sup>13</sup>C-APT NMR (CDCl<sub>3</sub>, 101 MHz, HSQC): δ 171.2, 169.7 (C=O), 137.1, 136.7 (C<sub>q</sub>), 128.7, 128.6, 128.5, 128.5, 128.3, 128.1, 128.1, 127.9, 127.8 (CH<sub>arom</sub>), 102.8 (C-1<sub>β</sub>), 97.4 (C-1<sub>α</sub>), 85.2 (C-2<sub>β</sub>), 82.1 (C-3<sub>β</sub>), 81.7 (C-3<sub>α</sub>), 80.8 (C-4<sub>β</sub>), 80.4 (C-2<sub>α</sub>), 77.9 (C-4<sub>α</sub>), 73.2, 73.0, 72.8, 72.1 (CH<sub>2</sub> Bn), 52.5 (CO<sub>2</sub>Me<sub>α</sub>), 52.1 (CO<sub>2</sub>Me<sub>β</sub>); HRMS: [M+NH<sub>4</sub>]<sup>+</sup> calcd for C<sub>20</sub>H<sub>26</sub>NO<sub>6</sub> 376.17546, found 376.17564.

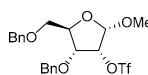

**Methyl 3,5-di-O-benzyl-2-O-trifluoromethanesulfonate-α-D-ribofuranoside (29).** The title compound was generated from **25**<sup>6</sup> by the general procedure for triflate formation and used crude. Spectroscopic data were in accord with those previously reported.<sup>7</sup> <sup>1</sup>H NMR (CDCl<sub>3</sub>, 400 MHz, HH-COSY, HSQC): δ 7.37 – 7.21 (m, 10H, CH<sub>arom</sub>), 5.09 (d, 1H, *J* = 4.3 Hz, H-1), 5.01 (dd, 1H, *J* = 6.5, 4.3 Hz, H-2), 4.75 (d, 1H, *J* = 12.2 Hz, CHH Bn), 4.53 – 4.44 (m, 2H, CHH Bn, CHH Bn), 4.40 (d, 1H, *J* = 12.0 Hz, CHH Bn), 4.19 (dt, 1H, *J* = 5.8, 3.1 Hz, H-4), 4.07 (dd, 1H, *J* = 6.5, 5.0 Hz, H-3), 3.53 (dd, 1H, *J* = 10.9, 2.9 Hz, H-5), 3.51 (s, 3H, CH<sub>3</sub> OMe), 3.33 (dd, 1H, *J* = 10.8, 3.3 Hz, H-5); <sup>13</sup>C-APT NMR (CDCl<sub>3</sub>, 101 MHz, HSQC): δ 137.7, 137.1 (C<sub>q</sub>), 128.7, 128.6, 128.4, 128.3, 128.0, 127.9 (CH<sub>arom</sub>), 118.7 (d, *J* = 319.6 Hz), 101.1 (C-1), 81.4 (C-2), 81.1 (C-4), 74.6 (C-3), 73.7, 73.5 (CH<sub>2</sub> Bn), 68.5 (C-5), 56.4 (OMe); HRMS: [M+NH<sub>4</sub>]<sup>+</sup> calcd for C<sub>21</sub>H<sub>27</sub>F<sub>3</sub>NO<sub>7</sub>S 494.14548, found 494.14526.

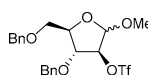

**Methyl 3,5-di-O-benzyl-2-O-trifluoromethanesulfonate-α/β-D-arabinofuranoside (30).** The title compound was generated from **26**<sup>8</sup> by the general procedure for triflate formation and used crude. Data for the α-anomer: <sup>1</sup>H NMR (CDCl<sub>3</sub>, 400 MHz, HH-COSY, HSQC): δ 7.38 – 7.23 (m, 10H, CH<sub>arom</sub>), 5.20 (s, 1H, H-2), 5.10 (s, 1H, H-1), 4.70 (d, 1H, *J* = 11.9 Hz, CHH Bn), 4.55 (d, 1H, *J* = 12.1 Hz, CHH Bn), 4.52 – 4.45 (m, 2H, 2x CHH Bn), 4.22 – 4.18 (m, 1H, H-4), 4.13 (ddd, 1H, *J* = 5.9, 1.7, 0.9 Hz, H-3), 3.61 (dd, 1H, *J* = 10.9, 3.6 Hz, H-5), 3.54 (dd, 1H, *J* = 10.9, 4.6 Hz, H-5), 3.42 (s, 3H, CH<sub>3</sub> OMe); <sup>13</sup>C-APT NMR (CDCl<sub>3</sub>, 101 MHz, HSQC): δ 137.8, 136.7 (C<sub>q</sub>), 128.7, 128.5, 128.3, 128.1, 127.9, 127.9 (CH<sub>arom</sub>), 118.5 (q, *J* = 319.8 Hz), 105.9 (C-1), 92.7 (C-2), 82.6 (C-3), 81.8 (C-4), 73.7, 72.8 (CH<sub>2</sub> Bn), 68.6 (C-5), 55.2 (OMe); Diagnostic peaks β-anomer: <sup>1</sup>H NMR (CDCl<sub>3</sub>, 400 MHz): δ 5.11 – 5.07 (m, 1H, H-1), 5.00 (d, 1H, *J* = 4.4 Hz, H-2), 4.62 (d, 1H, *J* = 11.8 Hz, CHH Bn), 4.57 (d, 1H, *J* = 11.8 Hz, CHH Bn), 4.55 – 4.48 (m, 2H, CH<sub>2</sub> Bn), 4.29 (dd, 1H, *J* = 6.5, 5.4 Hz, H-3), 4.17 – 4.12 (m, 1H, H-4), 3.57 – 3.53 (m, 1H, H-5), 3.47 (dd, 1H, *J* = 9.9, 6.2 Hz, H-5), 3.39 (s, 3H, CH<sub>3</sub> OMe); <sup>13</sup>C-APT NMR (CDCl<sub>3</sub>, 101 MHz, HSQC): δ 100.4 (C-1), 88.3 (C-2), 80.9 (C-3), 79.8 (C-4), 73.5, 72.6 (CH<sub>2</sub> Bn), 71.4 (C-5), 55.5 (OMe).

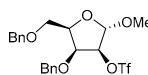

**Methyl 3,5-di-O-benzyl-2-O-trifluoromethanesulfonate-α-D-lyxofuranoside (31).** The title compound was generated from **27**<sup>9</sup> by the general procedure for triflate formation and used crude. <sup>1</sup>H NMR (CDCl<sub>3</sub>, 400 MHz, HH-COSY, HSQC): δ 7.43 – 7.13 (m, 10H, CH<sub>arom</sub>), 5.08 (s, 1H, H-1), 5.05 (d, 1H, *J* = 4.3 Hz, H-2), 4.73 (d, 1H, *J* = 11.7 Hz, CHH Bn), 4.63 (d, 1H, *J* = 12.0 Hz, CHH Bn), 4.51 (d, 1H, *J* = 11.7 Hz, CHH Bn), 4.50 (d, 1H, *J* = 12.0 Hz, CHH Bn), 4.46 – 4.37 (m, 2H, H-3, H-4), 3.74 (dd, 1H, *J* = 10.5, 4.1 Hz, H-5), 3.64 (dd, 1H, *J* = 10.5, 7.3 Hz, H-5), 3.38 (s, 3H, CH<sub>3</sub> OMe); <sup>13</sup>C-APT NMR (CDCl<sub>3</sub>, 101 MHz, HSQC): δ 138.0, 136.9 (C<sub>q</sub>), 128.7, 128.5, 128.3, 128.0, 128.0, 127.8 (CH<sub>arom</sub>), 118.6 (q, *J* = 319.6 Hz, CF<sub>3</sub>), 104.0 (C-1), 86.2 (C-2), 77.5 (C-4), 76.4 (C-3), 73.9, 73.7 (CH<sub>2</sub> Bn), 69.6 (C-5), 55.7 (OMe).

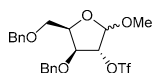

**Methyl 3,5-di-O-benzyl-2-O-trifluoromethanesulfonate- $\alpha/\beta$ -D-xylofuranoside (32).** The title compound was generated from **28**<sup>10</sup> by the general procedure for triflate formation (anomers were treated separately) and used crude. Data for the  $\alpha$ -anomer: <sup>1</sup>H NMR (CDCl<sub>3</sub>, 400 MHz, HH-COSY, HSQC):  $\delta$  7.37 – 7.21 (m, 10H, CH<sub>arom</sub>), 5.18 (t, 1H, *J* = 5.1 Hz, H-2), 5.06 (d, 1H, *J* = 4.4 Hz, H-1), 4.66 (d, 1H, *J* = 11.7 Hz, *CHH* Bn), 4.57 (d, 1H, *J* = 12.0 Hz, *CHH* Bn), 4.55 – 4.50 (m, 2H, 2*xCHH* Bn), 4.44 (dd, 1H, *J* = 6.9, 5.8 Hz, H-3), 4.33 (dt, 1H, *J* = 7.0, 4.6 Hz, H-4), 3.67 (dd, 1H, *J* = 10.5, 4.2 Hz, H-5), 3.59 (dd, 1H, *J* = 10.5, 5.1 Hz, H-5), 3.44 (s, 3H, CH<sub>3</sub> OMe); <sup>13</sup>C-APT NMR (CDCl<sub>3</sub>, 101 MHz, HSQC):  $\delta$  137.9, 136.9 (C<sub>q</sub>), 128.7, 128.5, 128.3, 127.9, 127.8, 127.8 (CH<sub>arom</sub>), 118.6 (q, *J* = 319.6 Hz), 99.6 (C-1), 87.9 (C-2), 79.3 (C-3), 75.7 (C-4), 73.7, 73.3 (CH<sub>2</sub> Bn), 68.4 (C-5), 56.0 (OMe); Data for the  $\beta$ -anomer: <sup>1</sup>H NMR (CDCl<sub>3</sub>, 400 MHz, HH-COSY, HSQC):  $\delta$  7.42 – 7.23 (m, 10H, CH<sub>arom</sub>), 5.17 (s, 1H, H-2), 5.05 (s, 1H, H-1), 4.71 (d, 1H, *J* = 12.1 Hz, *CHH* Bn), 4.59 (d, 1H, *J* = 12.0 Hz, *CHH* Bn), 4.54 (d, 1H, *J* = 12.0 Hz, *CHH* Bn), 4.53 (d, 1H, *J* = 12.1 Hz, *CHH* Bn), 4.48 (dt, 1H, *J* = 6.7, 5.5 Hz, H-4), 4.21 (dd, 1H, *J* = 5.9, 1.8 Hz, H-3), 3.74 (dd, 1H, *J* = 10.3, 5.1 Hz, H-5), 3.69 (dd, 1H, *J* = 10.3, 7.0 Hz, H-5), 3.42 (s, 3H, CH<sub>3</sub> OMe); <sup>13</sup>C-APT NMR (CDCl<sub>3</sub>, 101 MHz, HSQC):  $\delta$  138.0, 136.6, 128.7, 128.5, 128.4, 128.1, 128.0, 127.9, 106.4, 91.2, 80.6, 80.4, 73.7, 72.8, 69.2, 56.1; HRMS: [M+NH<sub>4</sub>]<sup>+</sup> calcd for C<sub>21</sub>H<sub>27</sub>F<sub>3</sub>NO<sub>7</sub>S 494.14548, found 494.14515.

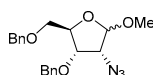

**Methyl 2-azido-3,5-di-O-benzyl-2-deoxy- $\alpha/\beta$ -D-ribofuranoside (33).** Employing conditions **C** of the general experimental for inversion of furanosyl triflates gave **33** as an  $\alpha:\beta$  = 1:2 mixture from *arabino*-triflate **30**, and as a 4:1 mixture of **33** and **51**, combined yield 86% (4.3 mmol). IR (thin film): 698, 740, 1028, 1066, 1107, 1271, 1452, 2108, 2918; Data for the  $\alpha$ -anomer (intermixed with **51**, *vide infra*): <sup>1</sup>H NMR (CDCl<sub>3</sub>, 400 MHz, HH-COSY, HSQC):  $\delta$  7.35 – 7.20 (m, 10H, CH<sub>arom</sub>), 5.03 (d, 1H, *J* = 4.6 Hz, H-1), 4.76 (d, 1H, *J* = 12.5 Hz, *CHH* Bn), 4.58 (d, 1H, *J* = 12.5 Hz, *CHH* Bn), 4.47 (d, 1H, *J* = 12.1 Hz, *CHH* Bn), 4.40 (d, 1H, *J* = 12.1 Hz, *CHH* Bn), 4.30 – 4.22 (m, 1H, H-4), 3.99 (dd, 1H, *J* = 7.2, 3.7 Hz, H-3), 3.49 (s, 3H, OMe), 3.45 (dd, 1H, *J* = 10.5, 3.7 Hz, H-5), 3.36 – 3.28 (m, 2H, H-2, H-5); <sup>13</sup>C-APT NMR (CDCl<sub>3</sub>, 101 MHz, HSQC):  $\delta$  137.8, 137.6 (C<sub>q</sub>), 128.4, 128.4, 128.0, 128.0, 127.7 (CH<sub>arom</sub>), 104.5 (C-1), 82.5 (C-4), 77.8 (C-3), 73.5, 72.9 (CH<sub>2</sub> Bn), 69.5 (C-5), 61.0 (C-2), 55.7 (OMe); Data for the  $\beta$ -anomer: <sup>1</sup>H NMR (CDCl<sub>3</sub>, 400 MHz, HH-COSY, HSQC):  $\delta$  7.38 – 7.23 (m, 10H, CH<sub>arom</sub>), 4.83 (s, 1H, H-1), 4.63 (d, 1H, *J* = 11.7 Hz, *CHH* Bn), 4.56 (d, 1H, *J* = 12.1 Hz, *CHH* Bn), 4.51 (d, 1H, *J* = 12.1 Hz, *CHH* Bn), 4.51 (d, 1H, *J* = 11.7 Hz, *CHH* Bn), 4.28 – 4.21 (m, 2H, H-3, H-4), 3.80 (d, 1H, *J* = 3.8 Hz, H-2), 3.59 – 3.54 (m, 1H, H-5), 3.52 – 3.47 (m, 1H, H-5), 3.29 (s, 3H, CH<sub>3</sub> OMe); <sup>13</sup>C-APT NMR (CDCl<sub>3</sub>, 101 MHz, HSQC):  $\delta$  138.1, 137.3 (C<sub>q</sub>), 128.5, 128.4, 128.1, 127.9, 127.6 (CH<sub>arom</sub>), 106.6 (C-1), 80.7 (C-4), 79.8 (C-3), 73.2, 73.0 (CH<sub>2</sub> Bn), 71.2 (C-5), 64.6 (C-2), 55.0 (OMe); HRMS: [M-N<sub>2</sub>+H]<sup>+</sup> calcd for C<sub>20</sub>H<sub>24</sub>NO<sub>4</sub> 387.20268, found 387.20275.

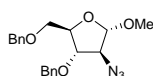

**Methyl 2-azido-3,5-di-O-benzyl-2-deoxy- $\alpha$ -D-arabinofuranoside (34).** Employing conditions **C** of the general experimental for inversion of furanosyl triflates gave **34** in 93% yield (5.37 mmol) from *ribo*-triflate **29**. [ $\alpha$ ]<sub>D</sub><sup>20</sup> = +76.4° (*c* = 1.0, CHCl<sub>3</sub>). IR (thin film): 698, 714, 1026, 1070, 1097, 1107, 1271, 1452, 2104, 2932; <sup>1</sup>H NMR (CDCl<sub>3</sub>, 400 MHz, HH-COSY, HSQC):  $\delta$  7.35 – 7.23 (m, 10H, CH<sub>arom</sub>), 4.88 (d, 1H, *J* = 1.5 Hz, H-1), 4.61 (d, 1H, *J* = 12.0 Hz, *CHH* Bn), 4.56 (d, 1H, *J* = 12.1 Hz, *CHH* Bn), 4.49 (d, 1H, *J* = 12.2 Hz, *CHH* Bn), 4.49 (d, 1H, *J* = 12.0 Hz, *CHH* Bn), 4.23 – 4.15 (m, 1H, H-4), 3.92 – 3.85 (m, 2H, H-2, H-3), 3.60 (dd, 1H, *J* = 10.8, 3.6 Hz, H-5), 3.54 (dd, 1H, *J* = 10.8, 4.8 Hz, H-5), 3.39 (s, 3H, CH<sub>3</sub> OMe); <sup>13</sup>C-APT NMR (CDCl<sub>3</sub>, 101 MHz, HSQC):  $\delta$  137.9, 137.2 (C<sub>q</sub>), 128.5, 128.4, 128.0, 128.0, 127.8, 127.7 (CH<sub>arom</sub>), 107.0 (C-1), 83.1 (C-3), 81.2 (C-4), 73.5, 72.6 (CH<sub>2</sub> Bn), 70.8 (C-2), 69.0 (C-5), 55.3 (OMe); <sup>13</sup>C HSQC-HECADE NMR (CDCl<sub>3</sub>, 126 MHz): <sup>2</sup>*J*<sub>C1,H2</sub> = -2.1 Hz, <sup>2</sup>*J*<sub>C2,H1</sub> = -0.3 Hz; HRMS: [M+NH<sub>4</sub>]<sup>+</sup> calcd for C<sub>20</sub>H<sub>27</sub>N<sub>4</sub>O<sub>4</sub> 387.20268, found 387.20271.

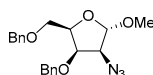

**Methyl 2-azido-3,5-di-O-benzyl-2-deoxy- $\alpha$ -D-lyxofuranoside (35).** Employing conditions **C** of the general experimental for inversion of furanosyl triflates, with additional 16 h stirring, gave **35** in 67% yield (3.36 mmol) from *xylo*-triflate **32 $\alpha$** , and side products **53 $\alpha$**  (12%) and **55** (7%). Spectroscopic data were in accord with those previously reported.<sup>11</sup> <sup>1</sup>H NMR (CDCl<sub>3</sub>, 400 MHz, HH-COSY, HSQC):  $\delta$  7.34 – 7.27 (m, 10H, CH<sub>arom</sub>), 4.95 (d, 1H, *J* = 2.1 Hz, H-1), 4.69 (d, 1H, *J* = 11.7 Hz, *CHH* Bn), 4.60 (d, 1H, *J* = 11.9 Hz, *CHH* Bn), 4.52 (d, 1H, *J* = 11.7 Hz, *CHH* Bn), 4.49 (d, 1H, *J* = 12.0 Hz, *CHH* Bn), 4.38 – 4.31 (m, 2H, H-3, H-4), 3.79 – 3.66 (m, 3H, H-2, H-5, H-5), 3.36 (s, 3H, CH<sub>3</sub> OMe); <sup>13</sup>C-APT NMR (CDCl<sub>3</sub>, 101 MHz, HSQC):  $\delta$  138.1, 137.4 (C<sub>q</sub>), 128.5, 128.4, 128.0, 127.9, 127.8, 127.7 (CH<sub>arom</sub>), 105.9 (C-1), 79.0 (C-3), 78.2 (C-4), 73.9, 73.6 (CH<sub>2</sub> Bn), 69.2 (C-5), 65.9 (C-2), 55.6 (OMe); <sup>13</sup>C HSQC-HECADE NMR (CDCl<sub>3</sub>, 126 MHz): <sup>2</sup>*J*<sub>C1,H2</sub> = -0.1 Hz, <sup>3</sup>*J*<sub>C1,H3</sub> = +2.3 Hz, <sup>3</sup>*J*<sub>C3,H1</sub> = +2.4 Hz; HRMS: [M+Na]<sup>+</sup> calcd for C<sub>20</sub>H<sub>23</sub>N<sub>3</sub>O<sub>4</sub> 392.15808, found 392.15787.

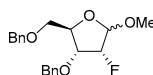

**Methyl 3,5-di-O-benzyl-2-deoxy-2-fluoro- $\alpha/\beta$ -D-ribofuranoside (37).** Employing conditions **A** of the general experimental for inversion of furanosyl triflates gave **37** in 63% yield (3.2 mmol), as two anomers (Rf: 0.47, and Rf: 0.15, 9/1 pentane/EtOAc) and two anomers of **52** (17% yield) from *arabino*-triflate **30**. Spectroscopic data were in accord with those previously reported for the  $\beta$ -anomer.<sup>8</sup> Data for the  $\alpha$ -anomer: <sup>1</sup>H NMR (CDCl<sub>3</sub>, 400 MHz, HH-COSY, HSQC):  $\delta$  7.41 – 7.27 (m, 10H, CH<sub>arom</sub>), 5.09 (dd, 1H, *J* = 4.1, 3.5 Hz, H-1), 4.88 (ddd, 1H, *J* = 51.1, 6.1, 4.2 Hz), 4.82 (d, 1H, *J* = 12.4 Hz, *CHH* Bn), 4.59 (d, 1H, *J* = 12.4 Hz, *CHH* Bn), 4.58 (d, 1H, *J* = 12.1 Hz, *CHH* Bn), 4.49 (d, 1H, *J* = 12.1 Hz, *CHH* Bn), 4.30 (dt, 1H, *J* = 5.3, 3.4 Hz, H-4), 4.00 (ddd, 1H, *J* = 7.6, 6.0, 5.2 Hz, H-3), 3.63 (dd, 1H, *J* = 10.9, 2.9 Hz, H-5), 3.56 (s, 3H, CH<sub>3</sub> OMe), 3.49 (dd, 1H, *J* = 10.8, 3.7 Hz, H-5); <sup>13</sup>C-APT NMR (CDCl<sub>3</sub>, 101 MHz, HSQC):  $\delta$  137.9, 137.8 (C<sub>q</sub>), 128.5, 128.5, 128.0, 128.0, 127.8, 127.7 (CH<sub>arom</sub>), 101.8 (d, *J* = 15.9 Hz, C-1), 88.2 (d, *J* = 202.7 Hz, C-2), 80.9 (d, *J* = 2.1 Hz, C-4), 74.6 (d, *J* = 14.8 Hz, C-3), 73.6 (CH<sub>2</sub> 5-OBn), 72.9 (d, *J* = 2.2 Hz, CH<sub>2</sub> 3-OBn), 69.1 (C-5), 56.1 (OMe); <sup>19</sup>F NMR (CDCl<sub>3</sub>, 470 MHz):  $\delta$  -216.73 (ddd, *J* = 51.2, 7.6, 3.3 Hz);

<sup>13</sup>C HSQC-HECADE NMR (CDCl<sub>3</sub>, 126 MHz): <sup>2</sup>J<sub>C1-H2</sub>: +2.4 Hz, <sup>2</sup>J<sub>C2-H1</sub>: +3.2 Hz; Data for the β-anomer: <sup>1</sup>H NMR (CDCl<sub>3</sub>, 400 MHz, HH-COSY, HSQC): δ 7.35 – 7.26 (m, 10H, CH<sub>arom</sub>), 5.00 (d, 1H, J = 10.6 Hz, H-1), 4.76 (dd, 1H, J = 53.2, 3.7 Hz, H-2), 4.66 (d, 1H, J = 11.7 Hz, CHH Bn), 4.59 (d, 1H, J = 12.1 Hz, CHH Bn), 4.54 (d, 1H, J = 12.1 Hz, CHH Bn), 4.54 (d, 1H, J = 11.7 Hz, CHH Bn), 4.30 (ddd, 1H, J = 8.0, 5.7, 3.4 Hz, H-4), 4.07 (ddd, 1H, J = 24.6, 7.7, 3.7 Hz, H-3), 3.64 (dd, 1H, J = 10.6, 3.4 Hz, H-5), 3.53 (dd, 1H, J = 10.6, 5.7 Hz, H-5), 3.32 (s, 3H, CH<sub>3</sub> OMe); <sup>13</sup>C-APT NMR (CDCl<sub>3</sub>, 101 MHz, HSQC): δ 138.3, 137.4 (C<sub>q</sub>), 128.6, 128.4, 128.1, 128.0, 127.7 (CH<sub>arom</sub>), 105.7 (d, J = 29.3 Hz, C-1), 91.2 (d, J = 185.1 Hz, C-2), 80.1 (C-4), 77.8 (d, J = 15.6 Hz, C-3), 73.3, 72.8 (CH<sub>2</sub> Bn), 71.0 (C-5), 55.1 (OMe); <sup>19</sup>F NMR (CDCl<sub>3</sub>, 471 MHz): δ -209.71 (ddd, J = 53.2, 24.6, 10.6 Hz); <sup>13</sup>C HSQC-HECADE NMR (CDCl<sub>3</sub>, 126 MHz): <sup>2</sup>J<sub>C1-H2</sub>: +1.6 Hz, <sup>2</sup>J<sub>C2-H1</sub>: -1.6 Hz; HRMS: [M+NH<sub>4</sub>]<sup>+</sup> calcd for C<sub>20</sub>H<sub>24</sub>FNO<sub>4</sub> 364.19186, found 364.19205.

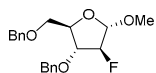

**Methyl 3,5-di-O-benzyl-2-deoxy-2-fluoro-α-D-arabinofuranoside (38).** Employing conditions **A** of the general experimental for inversion of furanosyl triflates gave **38** in 86% yield (0.95 mmol) from *ribo*-triflate **29**.

Spectroscopic data were in accord with those previously reported.<sup>12</sup> IR (thin film): 696, 737, 947, 988, 1039, 1055, 1098, 1193, 1364, 1454, 2862, 2922; <sup>1</sup>H NMR (CDCl<sub>3</sub>, 400 MHz, HH-COSY, HSQC): δ 7.37 – 7.25 (m, 10H, CH<sub>arom</sub>), 5.06 (d, 1H, J = 12.0 Hz, H-1), 4.94 (dd, 1H, J = 51.3, 1.8 Hz, H-2), 4.67 (d, 1H, J = 12.0 Hz, CHH Bn), 4.58 (d, 1H, J = 12.1 Hz, CHH Bn), 4.56 – 4.51 (m, 2H, 2xCHH Bn), 4.21 (ddd, 1H, J = 6.4, 5.2, 3.8 Hz, H-4), 3.99 (dddd, 1H, J = 24.7, 6.4, 1.9, 1.0 Hz, H-3), 3.63 (dd, 1H, J = 10.8, 3.8 Hz, H-5), 3.58 (dd, 1H, J = 10.8, 5.1 Hz, H-5), 3.40 (s, 3H, CH<sub>3</sub> OMe); <sup>13</sup>C-APT NMR (CDCl<sub>3</sub>, 126 MHz, HSQC): δ 138.0, 137.2 (C<sub>q</sub>), 128.5, 128.4, 128.0, 127.7, 127.7 (CH<sub>arom</sub>), 106.5 (d, J = 36.0 Hz, C-1), 99.6 (d, J = 181.3 Hz, C-2), 83.0 (d, J = 25.6 Hz, C-3), 81.3 (d, J = 4.0 Hz, C-4), 73.4, 72.5 (CH<sub>2</sub> Bn), 69.3 (C-5), 54.9 (OMe); <sup>19</sup>F NMR (CDCl<sub>3</sub>, 471 MHz): δ -188.39 (ddd, J = 51.3, 24.6, 12.0 Hz); <sup>13</sup>C HSQC-HECADE NMR (CDCl<sub>3</sub>, 126 MHz): <sup>2</sup>J<sub>C1-H2</sub> = -0.7 Hz, <sup>2</sup>J<sub>C2-H1</sub> = -2.0 Hz; HRMS: [M+NH<sub>4</sub>]<sup>+</sup> calcd for C<sub>20</sub>H<sub>27</sub>NFO<sub>4</sub> 364.19186, found 364.19196.

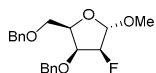

**Methyl 3,5-di-O-benzyl-2-deoxy-2-fluoro-α-D-lyxofuranoside (39).** Employing conditions **B** of the general experimental for inversion of furanosyl triflates, with an additional 70°C reflux for 7 h, gave **39** in 44% yield (2.19 mmol) from *xylo*-triflate **32α**. Conditions **A** yielded 57% **54α** and 21% **55**. IR (thin film): 698, 739, 1056,

1452, 2932; <sup>1</sup>H NMR (CDCl<sub>3</sub>, 500 MHz, HH-COSY, HSQC): δ 7.40 – 7.24 (m, 10H, CH<sub>arom</sub>), 5.08 (dd, 1H, J = 10.0, 1.0 Hz, H-1), 4.80 (ddd, 1H, J = 52.8, 4.1, 1.0 Hz, H-2), 4.68 (d, 1H, J = 11.9 Hz, CHH Bn), 4.65 (d, 1H, J = 12.1 Hz, CHH Bn), 4.53 (d, 1H, J = 11.8 Hz, CHH Bn), 4.52 (d, 1H, J = 12.1 Hz, CHH Bn), 4.42 (ddd, 1H, J = 8.0, 7.1, 3.8 Hz, H-4), 4.30 (ddd, 1H, J = 20.9, 7.1, 4.1 Hz, H-3), 3.77 (dd, 1H, J = 10.5, 3.8 Hz, H-5), 3.67 (ddd, 1H, J = 10.5, 8.0, 1.4 Hz, H-5); <sup>13</sup>C-APT NMR (CDCl<sub>3</sub>, 126 MHz, HSQC): δ 138.4, 137.5 (C<sub>q</sub>), 128.6, 128.5, 128.1, 128.0, 127.8, 127.7 (CH<sub>arom</sub>), 105.0 (d, J = 29.8 Hz, C-1), 92.4 (d, J = 187.9 Hz, C-2), 77.7 (C-4), 77.1 (d, J = 14.9 Hz, C-3), 73.6, 73.3 (CH<sub>2</sub> Bn), 70.3 (C-5), 55.5 (OMe); <sup>19</sup>F NMR (CDCl<sub>3</sub>, 471 MHz, HH-COSY, HSQC): δ -207.58 (dddd, J = 52.8, 20.9, 10.0, 1.0 Hz); <sup>13</sup>C HSQC-HECADE NMR (CDCl<sub>3</sub>, 126 MHz): <sup>2</sup>J<sub>C2-H1</sub> = -2.5 Hz; HRMS: [M+Na]<sup>+</sup> calcd for C<sub>20</sub>H<sub>23</sub>FO<sub>4</sub>Na 369.14726, found 369.14734.

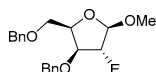

**Methyl 3,5-di-O-benzyl-2-deoxy-2-fluoro-β-D-xylofuranoside (40).** Employing conditions **A** of the general experimental for inversion of furanosyl triflates gave **40β** in 10% yield (0.52 mmol) as the minor product from *xylo*-triflate **32β**. IR (thin film): 698, 712, 978, 1068, 1107, 2929; <sup>1</sup>H NMR (CDCl<sub>3</sub>, 500 MHz, HH-COSY,

HSQC): δ 7.37 – 7.26 (m, 10H, CH<sub>arom</sub>), 5.02 (d, 1H, J = 14.8 Hz, H-1), 4.93 (d, 1H, J = 50.6 Hz, H-2), 4.68 (d, 1H, J = 12.2 Hz, CHH Bn), 4.60 (d, 1H, J = 12.0 Hz, CHH Bn), 4.55 (d, 1H, J = 12.0 Hz, CHH Bn), 4.54 (d, 1H, J = 12.1 Hz, CHH Bn), 4.52 – 4.48 (m, 1H, H-4), 4.15 (ddd, 1H, J = 18.2, 6.1, 1.7 Hz, H-3), 3.76 (dd, 1H, J = 10.3, 4.9 Hz, H-5), 3.70 (dd, 1H, J = 10.3, 7.3 Hz, H-5), 3.41 (s, 3H, CH<sub>3</sub> OMe); <sup>13</sup>C-APT NMR (CDCl<sub>3</sub>, 126 MHz, HSQC): δ 138.3, 137.4 (C<sub>q</sub>), 128.6, 128.5, 128.1, 127.9, 127.9, 127.8 (CH<sub>arom</sub>), 107.1 (d, J = 35.2 Hz, C-1), 98.4 (d, J = 181.0 Hz, C-2), 80.9 (d, J = 25.9 Hz, C-3), 80.7 (d, J = 1.9 Hz, C-4), 73.6, 72.7 (CH<sub>2</sub> Bn), 69.7 (C-5), 55.8 (OMe); <sup>19</sup>F NMR (CDCl<sub>3</sub>, 471 MHz): δ -192.85 (ddd, J = 50.6, 18.1, 14.9 Hz); <sup>13</sup>C HSQC-HECADE NMR (CDCl<sub>3</sub>, 126 MHz): <sup>2</sup>J<sub>C1-H2</sub> = -2.6 Hz, <sup>2</sup>J<sub>C2-H1</sub> = -0.2 Hz; HRMS: [M+NH<sub>4</sub>]<sup>+</sup> calcd for C<sub>20</sub>H<sub>27</sub>FNO<sub>4</sub> 364.19186, found 364.19192.

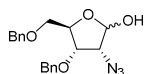

**2-azido-3,5-di-O-benzyl-2-deoxy-α/β-D-ribofuranose (41).** The title compound was generated from a 4:1 mixture of **33** and **51** by the general procedure for methyl furanoside hydrolysis, conditions A (65°C, 6 h).

Combined yield: 89%, Yield of **41** was 70% over two steps (from **26**), α:β = 33:67 (0.29 mmol) as a colourless oil. IR (thin film): 696, 741, 1094, 1454, 2105, 2866, 3330; <sup>1</sup>H NMR (CDCl<sub>3</sub>, 400 MHz, HH-COSY, HSQC): δ 7.37 – 7.22 (m, 15H, CH<sub>arom</sub>), 5.35 (bs, 0.5H, H-1<sub>α</sub>), 5.23 (s, 1H, H-1<sub>β</sub>), 4.68 – 4.58 (m, 2H, CH<sub>2</sub> Bn<sub>α</sub>, CHH Bn<sub>β</sub>), 4.53 (d, 1H, J = 11.8 Hz, CHH Bn<sub>β</sub>), 4.49 – 4.35 (m, 4.5H, 2xCHH Bn<sub>β</sub>, CH<sub>2</sub> Bn<sub>α</sub>, H-3<sub>β</sub>, H-4<sub>α</sub>), 4.21 (dt, 1H, J = 6.4, 3.1 Hz, H-4<sub>β</sub>), 4.13 (bs, 1H, 1-OH<sub>β</sub>), 4.09 (dd, 0.5H, J = 5.4, 2.7 Hz, H-3<sub>α</sub>), 3.96 (bs, 0.5H, 1-OH<sub>α</sub>), 3.78 (d, 1H, J = 5.1 Hz, H-2<sub>β</sub>), 3.66 (dd, 0.5H, J = 5.4, 4.4 Hz, H-2<sub>α</sub>), 3.62 (dd, 1H, J = 10.4, 2.9 Hz, H-5<sub>β</sub>), 3.49 – 3.40 (m, 1.5H, H-5<sub>β</sub>, 2xH-5<sub>α</sub>); <sup>13</sup>C-APT NMR (CDCl<sub>3</sub>, 101 MHz, HSQC): δ 137.6, 137.2, 137.0, 136.8 (C<sub>q</sub>), 128.6, 128.6, 128.6, 128.5, 128.3, 128.2, 128.1, 128.0, 128.0, 127.9, 127.7 (CH<sub>arom</sub>), 100.8 (C-1<sub>β</sub>), 97.6 (C-1<sub>α</sub>), 81.6 (C-4<sub>α</sub>), 80.9 (C-4<sub>β</sub>), 78.8 (C-3<sub>α</sub>), 78.4 (C-3<sub>β</sub>), 73.6, 73.6, 73.1, 73.0 (CH<sub>2</sub> Bn), 69.6 (C-5<sub>α</sub>), 69.3 (C-5<sub>β</sub>), 65.9 (C-2<sub>β</sub>), 62.1 (C-2<sub>α</sub>); HRMS: [M+NH<sub>4</sub>]<sup>+</sup> calcd for C<sub>19</sub>H<sub>25</sub>N<sub>4</sub>O<sub>4</sub> 373.18703, found 373.18699.

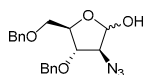

**2-azido-3,5-di-O-benzyl-2-deoxy-α/β-D-arabinofuranose (42).** The title compound was generated from **34** (554 mg, 1.50 mmol) by the general procedure for methyl furanoside hydrolysis, conditions A (60°C, 64 h). Yield: 76% α:β = 1:1 (1.1 mmol) as a colourless oil. IR (thin film): 696, 735, 1070, 1454, 2108, 3320; <sup>1</sup>H NMR (CDCl<sub>3</sub>,

400 MHz, HH-COSY, HSQC):  $\delta$  7.45 – 7.10 (m, 20H), 5.33 (d, 1H,  $J$  = 7.0 Hz, H-1 $\alpha$ ), 5.30 (dd, 1H,  $J$  = 9.1, 4.6 Hz, H-1 $\beta$ ), 4.68 (d, 1H,  $J$  = 11.7 Hz, *CHH* Bn), 4.62 (d, 1H,  $J$  = 12.0 Hz, *CHH* Bn), 4.58 – 4.54 (m, 4H, 2x CH<sub>2</sub> Bn), 4.52 (d, 1H,  $J$  = 11.8 Hz, *CHH* Bn), 4.50 (d, 1H,  $J$  = 11.8 Hz, *CHH* Bn), 4.45 – 4.38 (m, 1H, H-4 $\alpha$ ), 4.24 (dd, 1H,  $J$  = 7.0, 5.2 Hz, H-3 $\beta$ ), 4.16 (dt, 1H,  $J$  = 5.2, 3.0 Hz, H-4 $\beta$ ), 3.98 – 3.94 (m, 2H, H-2 $\alpha$ , OH $\beta$ ), 3.91 (ddd, 1H,  $J$  = 4.3, 2.6, 0.6 Hz, H-3 $\alpha$ ), 3.80 (dd, 1H,  $J$  = 6.9, 4.5 Hz, H-2 $\beta$ ), 3.59 (dd, 1H,  $J$  = 10.3, 3.2 Hz, H-5 $\beta$ ), 3.60 – 3.50 (m, 2H, 2xH-5 $\alpha$ ), 3.41 (dd, 1H,  $J$  = 10.3, 3.0 Hz, H-5 $\beta$ ), 3.30 (d, 1H,  $J$  = 6.9 Hz, OH $\alpha$ ); <sup>13</sup>C-APT NMR (CDCl<sub>3</sub>, 101 MHz, HSQC):  $\delta$  137.9, 137.4, 136.9, 136.8 (C<sub>q</sub>), 128.8, 128.7, 128.7, 128.6, 128.4, 128.3, 128.3, 128.1, 128.1, 128.1, 127.9 (CH<sub>arom</sub>), 101.0 (C-1 $\alpha$ ), 97.4 (C-1 $\beta$ ), 82.9 (C-3 $\alpha$ ), 82.2 (C-4 $\alpha$ ), 81.8 (C-4 $\beta$ ), 80.3 (C-3 $\beta$ ), 73.9, 73.6, 72.7, 72.6 (CH<sub>2</sub> Bn), 70.2 (C-2 $\alpha$ ), 69.9 (C-5 $\beta$ ), 69.6 (C-5 $\alpha$ ), 68.7 (C-2 $\beta$ ); <sup>13</sup>C HSQC-HECADE NMR (CDCl<sub>3</sub>, 126 MHz):  $\alpha$ -anomer: <sup>2</sup>*J*<sub>C1-H2</sub> = -2.2 Hz, <sup>2</sup>*J*<sub>C2-H1</sub> = -0.1 Hz.  $\beta$ -anomer: <sup>2</sup>*J*<sub>C1-H2</sub> = -2.1 Hz, <sup>2</sup>*J*<sub>C2-H1</sub> = +2.2 Hz; HRMS: [M+Na]<sup>+</sup> calcd for C<sub>19</sub>H<sub>26</sub>N<sub>3</sub>O<sub>4</sub>Na 378.14243, found 378.14248.

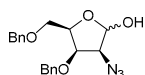

**2-azido-3,5-di-O-benzyl-2-deoxy- $\alpha$ - $\beta$ -D-lyxofuranose (43).** The title compound was generated from **35** (620 mg, 1.68 mmol) by the general procedure for methyl furanoside hydrolysis, conditions A (60°C, 18 h). Yield: 62%  $\alpha$ : $\beta$  = 60:40 (1.04 mmol) as a colourless oil. IR (thin film): 696, 734, 1026, 1070, 1269, 1454, 2110, 2868, 2924, 3400; <sup>1</sup>H NMR (CDCl<sub>3</sub>, 400 MHz, HH-COSY, HSQC):  $\delta$  7.37 – 7.28 (m, 10H, CH<sub>arom</sub>), 5.45 (t, 0.6H,  $J$  = 2.7 Hz, H-1 $\alpha$ ), 5.28 (dd, 0.4H,  $J$  = 12.2, 4.6 Hz, H-1 $\beta$ ), 4.80 (d, 0.4H,  $J$  = 11.0 Hz, *CHH* Bn $\beta$ ), 4.72 (d, 0.6H,  $J$  = 11.7 Hz, *CHH* Bn $\alpha$ ), 4.65 (d, 0.4H,  $J$  = 11.0 Hz, *CHH* Bn $\beta$ ), 4.62 – 4.47 (m, 3.2H, CH<sub>2</sub> Bn $\alpha$ , CH<sub>2</sub> Bn $\beta$ , *CHH* Bn $\alpha$ , H-4 $\alpha$ ), 4.41 (t, 0.6H,  $J$  = 5.5 Hz, H-3 $\alpha$ ), 4.22 (t, 0.4H,  $J$  = 4.0 Hz, H-3 $\beta$ ), 4.17 (ddd, 0.4H,  $J$  = 7.2, 5.5, 3.8 Hz, H-4 $\beta$ ), 3.84 – 3.76 (m, 1.4H, H-2 $\alpha$ , H-5 $\beta$ , OH $\beta$ ), 3.74 – 3.67 (m, 1.6H, H-5 $\beta$ , H-5 $\alpha$ , H-5 $\alpha$ ), 3.63 (t, 0.4H,  $J$  = 4.4 Hz, H-2 $\beta$ ), 3.06 (d, 0.6H,  $J$  = 3.1 Hz, OH $\alpha$ ); <sup>13</sup>C-APT NMR (CDCl<sub>3</sub>, 101 MHz, HSQC):  $\delta$  128.7, 128.6, 128.6, 128.5, 128.5, 128.4, 128.2, 128.1, 128.0, 128.0, 127.8 (CH<sub>arom</sub>), 99.8 (C-1 $\alpha$ ), 97.3 (C-1 $\beta$ ), 79.6 (C-4 $\alpha$ ), 79.0 (C-3), 78.5, 78.4 (C-3 $\beta$ , C-4 $\beta$ ), 75.0, 74.0, 73.9, 73.7 (CH<sub>2</sub> Bn), 69.4 (C-5 $\alpha$ ), 68.8 (C-5 $\beta$ ), 66.6 (C-2 $\alpha$ ), 63.0 (C-2 $\beta$ ); HRMS: [M+Na]<sup>+</sup> calcd for C<sub>19</sub>H<sub>21</sub>N<sub>3</sub>O<sub>4</sub>Na 378.14243, found 378.14233.

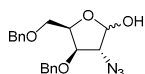

**2-azido-3,5-di-O-benzyl-2-deoxy- $\alpha$ - $\beta$ -D-xylofuranose (44).** Selenoglycoside **50** (360 mg, 0.72 mmol, 1 eq.) was dissolved in THF/H<sub>2</sub>O/acetone (3/2/3 v/v/v, 8 mL) and cooled to 0°C, followed by addition of NIS (180 mg, 0.8 mmol, 1.1 eq.). After 1 h the reaction mixture was quenched by addition of 10% Na<sub>2</sub>S<sub>2</sub>O<sub>3</sub>, diluted with H<sub>2</sub>O and extracted with DCM three times. The combined organic layer was washed with brine, dried (MgSO<sub>4</sub>), filtered and concentrated *in vacuo*. Purification by flash column chromatography (19/1 to 8/2 pentane/EtOAc) gave the title compound as a colourless oil (222 mg, 0.62 mmol, 87%). IR (thin film): 696, 737, 1053, 1255, 1454, 2102, 2866, 2924, 3390; <sup>1</sup>H NMR (CDCl<sub>3</sub>, 400 MHz, HH-COSY, NOESY, HSQC):  $\delta$  7.37 – 7.25 (m, 20H, CH<sub>arom</sub>), 5.48 (dd, 1H,  $J$  = 5.4, 4.6 Hz, H-1 $\alpha$ ), 5.15 (dd, 1H,  $J$  = 11.4, 1.7 Hz, H-1 $\beta$ ), 4.66 (d, 1H,  $J$  = 11.7 Hz, *CHH* Bn), 4.65 (d, 1H,  $J$  = 11.8 Hz, *CHH* Bn), 4.61 (d, 1H,  $J$  = 11.7 Hz, *CHH* Bn), 4.59 – 4.54 (m, 4H, *CHH* Bn, 3x*CHH* Bn), 4.52 (d, 1H,  $J$  = 12.0 Hz, *CHH* Bn), 4.47 (td, 1H,  $J$  = 6.1, 4.5 Hz, H-4 $\alpha$ ), 4.29 (dt, 1H,  $J$  = 5.6, 4.5 Hz, H-4 $\beta$ ), 4.23 (dd, 1H,  $J$  = 5.9, 5.2 Hz, H-3 $\alpha$ ), 4.15 (d, 1H,  $J$  = 11.4 Hz, 1-OH $\beta$ ), 4.03 (dd, 1H,  $J$  = 5.6, 3.7 Hz, H-3 $\beta$ ), 3.99 (dd, 1H,  $J$  = 4.1, 1.7 Hz, H-2 $\beta$ ), 3.89 – 3.85 (m, 1H, H-2 $\alpha$ ), 3.73 (dd, 1H,  $J$  = 10.1, 4.7 Hz, H-5 $\beta$ ), 3.70 (dd, 1H,  $J$  = 10.1, 4.3 Hz, H-5 $\beta$ ), 3.68 (dd, 1H,  $J$  = 10.3, 4.6 Hz, H-5 $\alpha$ ), 3.61 (dd, 1H,  $J$  = 10.3, 6.2 Hz, H-5 $\alpha$ ), 3.61 (d, 1H,  $J$  = 5.6 Hz, 1-OH $\alpha$ ); <sup>13</sup>C-APT NMR (CDCl<sub>3</sub>, 101 MHz, HSQC):  $\delta$  137.9, 137.3, 136.9 (C<sub>q</sub>), 128.7, 128.6, 128.5, 128.4, 128.1, 128.1, 128.0, 128.0, 127.9, 127.9, 127.8 (CH<sub>arom</sub>), 101.2 (C-1 $\beta$ ), 96.2 (C-1 $\alpha$ ), 81.6 (C-3 $\beta$ ), 80.8 (C-3 $\alpha$ ), 79.5 (C-4 $\beta$ ), 77.1 (C-4 $\alpha$ ), 73.9, 73.6, 73.2, 73.0 (CH<sub>2</sub> Bn), 70.5 (C-2 $\beta$ ), 68.8 (C-5 $\alpha$ ), 68.5 (C-5 $\beta$ ), 66.9 (C-2 $\alpha$ ); <sup>13</sup>C HSQC-HECADE NMR (CDCl<sub>3</sub>, 126 MHz):  $\alpha$ -anomer: <sup>2</sup>*J*<sub>C1,H2</sub> = -0.5 Hz, <sup>2</sup>*J*<sub>C2,H1</sub> = +3.9 Hz,  $\beta$ -anomer: <sup>2</sup>*J*<sub>C1,H2</sub> = -2.4 Hz, <sup>2</sup>*J*<sub>C2,H1</sub> = -0.2 Hz; As additional confirmation of the xylo-configuration:  $\alpha$ -anomer: <sup>2</sup>*J*<sub>C2,H3</sub> = -2.8 Hz, <sup>2</sup>*J*<sub>C3,H2</sub> = -5.0 Hz,  $\beta$ -anomer: <sup>2</sup>*J*<sub>C2,H3</sub> = -3.3 Hz, <sup>2</sup>*J*<sub>C3,H2</sub> = -4.6 Hz). HRMS: [M+Na]<sup>+</sup> calcd for C<sub>19</sub>H<sub>21</sub>N<sub>3</sub>O<sub>4</sub>Na 378.14243, found 378.14235.

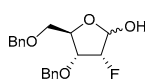

**3,5-di-O-benzyl-2-deoxy-2-fluoro- $\alpha$ - $\beta$ -D-ribofuranose (45).** The title compound was generated from **37** (205 mg, 0.59 mmol) by the general procedure for methyl furanoside hydrolysis, conditions A (60°C, 18 h). Yield: 78%  $\alpha$ : $\beta$  = 25:75 (0.46 mmol). Spectroscopic data were in accord with those previously reported.<sup>8</sup> <sup>1</sup>H NMR (CDCl<sub>3</sub>, 400 MHz, HH-COSY, HSQC):  $\delta$  7.40 – 7.21 (m, 10H, CH<sub>arom</sub>), 5.35 (dd, 0.75H,  $J$  = 8.5, 6.7 Hz, H-1 $\beta$ ), 5.33 (dt, 0.25H,  $J$  = 11.7, 3.6 Hz, H-1 $\alpha$ ), 4.91 (dt, 0.25H,  $J$  = 51.8, 4.3 Hz, H-2 $\alpha$ ), 4.76 (dd, 0.75H,  $J$  = 53.3, 3.4 Hz, H-2 $\beta$ ), 4.72 (d, 0.25H,  $J$  = 11.8 Hz, *CHH* Bn $\alpha$ ), 4.66 (d, 0.75H,  $J$  = 11.7 Hz, *CHH* Bn $\beta$ ), 4.60 – 4.42 (m, 3H, *CHH* Bn $\alpha$ , *CHH* Bn $\beta$ , CH<sub>2</sub> Bn $\alpha$ , CH<sub>2</sub> Bn $\beta$ ), 4.34 (qd, 0.25H,  $J$  = 3.4, 1.0 Hz, H-4 $\alpha$ ), 4.31 – 4.21 (m, 1.5H, H-3 $\beta$ , H-4 $\beta$ ), 4.09 – 4.01 (m, 0.5H, H-3 $\alpha$ , 1-OH $\alpha$ ), 3.89 (dd, 0.75H,  $J$  = 6.7, 0.9 Hz, 1-OH $\beta$ ), 3.66 (dd, 0.75H,  $J$  = 10.4, 2.4 Hz, H-5 $\beta$ ), 3.54 (dd, 0.25H,  $J$  = 10.7, 3.3 Hz, H-5 $\alpha$ ), 3.51 – 3.45 (m, 1H, H-5 $\alpha$ , H-5 $\beta$ ); <sup>13</sup>C-APT NMR (CDCl<sub>3</sub>, 101 MHz, HSQC):  $\delta$  137.8, 137.3, 137.1 (C<sub>q</sub>), 128.6, 128.6, 128.5, 128.2, 128.1, 128.1, 128.0, 127.9, 127.7 (CH<sub>arom</sub>), 99.8 (d,  $J$  = 29.2 Hz, C-1 $\beta$ ), 95.9 (d,  $J$  = 18.5 Hz, C-1 $\alpha$ ), 91.9 (d,  $J$  = 187.5 Hz, C-2 $\beta$ ), 88.8 (d,  $J$  = 197.2 Hz, C-2 $\alpha$ ), 80.7 (d,  $J$  = 3.5 Hz, C-4 $\alpha$ ), 76.8 (C-4 $\beta$ ), 76.8 (d,  $J$  = 14.7 Hz, C-3 $\alpha$ ), 76.5 (d,  $J$  = 15.5 Hz, C-3 $\beta$ ), 73.6 (CH<sub>2</sub> Bn $\alpha$ ), 73.6 (CH<sub>2</sub> Bn $\beta$ ), 73.2 (d,  $J$  = 2.2 Hz, CH<sub>2</sub> Bn $\alpha$ ), 72.8 (CH<sub>2</sub> Bn $\beta$ ), 69.4 (C-5 $\alpha$ ), 69.1 (C-5 $\beta$ ); <sup>13</sup>C HSQC-HECADE NMR (CDCl<sub>3</sub>, 126 MHz):  $\alpha$ -anomer: <sup>2</sup>*J*<sub>C1-H2</sub>: +1.8 Hz, <sup>2</sup>*J*<sub>C2-H1</sub>: +2.0 Hz,  $\beta$ -anomer: <sup>2</sup>*J*<sub>C2-H1</sub>: -0.3 Hz; HRMS: [M+Na]<sup>+</sup> calcd for C<sub>19</sub>H<sub>21</sub>FO<sub>4</sub>Na 355.13161, found 355.13147.

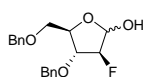

**3,5-di-O-benzyl-2-deoxy-2-fluoro- $\alpha$ - $\beta$ -D-arabinofuranose (46).** The title compound was generated from **38** (470 mg, 1.36 mmol) by the general procedure for methyl furanoside hydrolysis, conditions A (65°C, 64 h). Yield: 63%  $\alpha$ : $\beta$  = 70:30 (0.85 mmol) as a colourless oil. Spectroscopic data were in accord with those previously



reported.<sup>12</sup> Data for the  $\alpha$ -anomer:  $^1\text{H}$  NMR ( $\text{CDCl}_3$ , 500 MHz, HH-COSY, HSQC):  $\delta$  7.37 – 7.23 (m, 10H,  $\text{CH}_{\text{arom}}$ ), 5.45 (dd, 1H,  $J$  = 10.7, 2.9 Hz, H-1), 4.93 (d, 1H,  $J$  = 50.2 Hz, H-2), 4.62 (d, 1H,  $J$  = 12.0 Hz,  $\text{CHH}$  Bn), 4.57 – 4.47 (m, 3H,  $\text{CH}_2$  Bn,  $\text{CHH}$  Bn), 4.43 (q, 1H,  $J$  = 5.2 Hz, H-4), 3.98 (dd, 1H,  $J$  = 21.0, 4.8 Hz, H-3), 3.76 (d, 1H,  $J$  = 4.1 Hz, OH), 3.58 – 3.54 (m, 1H, H-5), 3.51 (dd, 1H,  $J$  = 10.3, 5.1 Hz, H-5);  $^{13}\text{C}$ -APT NMR ( $\text{CDCl}_3$ , 126 MHz, HSQC):  $\delta$  137.9, 137.0 ( $\text{C}_q$ ), 128.6, 128.4, 128.1, 128.0, 127.8, 127.8 ( $\text{CH}_{\text{arom}}$ ), 100.4 (d,  $J$  = 34.5 Hz, C-2), 98.4 (d,  $J$  = 182.7 Hz, C-1), 82.6 (d,  $J$  = 25.6 Hz, C-3), 81.9 (d,  $J$  = 2.0 Hz, C-4), 73.5, 72.4 ( $\text{CH}_2$  Bn), 69.7 (C-5);  $^{19}\text{F}$  NMR ( $\text{CDCl}_3$ , 471 MHz):  $\delta$  -189.12 (ddd,  $J$  = 50.7, 21.0, 10.8 Hz);  $^{13}\text{C}$  HSQC-HECADE NMR:  $^2J_{\text{C1-H2}} = +1.8$  Hz,  $^2J_{\text{C2-H1}} = +3.9$  Hz; Data for the  $\beta$ -anomer:  $^1\text{H}$  NMR ( $\text{CDCl}_3$ , 500 MHz, HH-COSY, HSQC):  $\delta$  7.36 – 7.23 (m, 10H,  $\text{CH}_{\text{arom}}$ ), 5.32 – 5.24 (m, 1H, H-1), 5.00 – 4.85 (m, 1H, H-2), 4.66 (d, 1H,  $J$  = 11.8 Hz,  $\text{CHH}$  Bn), 4.57 – 4.47 (m, 3H,  $\text{CHH}$  Bn,  $\text{CH}_2$  Bn), 4.28 (dt, 1H,  $J$  = 17.8, 4.9 Hz, H-3), 4.22 (d, 1H,  $J$  = 9.5 Hz, OH), 4.09 (q, 1H,  $J$  = 3.8 Hz, H-4), 3.58 – 3.54 (m, 1H, H-5), 3.47 (dd, 1H,  $J$  = 10.3, 3.8 Hz, H-5);  $^{13}\text{C}$ -APT NMR ( $\text{CDCl}_3$ , 126 MHz, HSQC):  $\delta$  137.3, 137.1 ( $\text{C}_q$ ), 128.6, 128.6, 128.1, 128.1, 128.0, 127.9 ( $\text{CH}_{\text{arom}}$ ), 95.8 (d,  $J$  = 194.1 Hz, C-2), 95.4 (d,  $J$  = 18.8 Hz, C-1), 80.6 (d,  $J$  = 22.8 Hz, C-3), 80.1 (d,  $J$  = 8.2 Hz, C-4), 73.7, 72.2 ( $\text{CH}_2$  Bn), 70.0 (C-5);  $^{19}\text{F}$  NMR ( $\text{CDCl}_3$ , 471 MHz):  $\delta$  -202.72 (dd,  $J$  = 52.7, 17.8 Hz); HRMS:  $[\text{M}+\text{Na}]^+$  calcd for  $\text{C}_{19}\text{H}_{21}\text{FO}_4\text{Na}$  355.13161, found 355.13160.

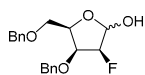

**3,5-di-O-benzyl-2-deoxy-2-fluoro- $\alpha/\beta$ -D-lyxofuranose (47).** The title compound was generated from **39** (340 mg, 0.98 mmol) by the general procedure for methyl furanoside hydrolysis, conditions A (65°C, 6 h). Yield: 75%  $\alpha:\beta$  = 1:1 (0.73 mmol). IR (thin film): 696, 735, 1027, 1045, 1454, 2864, 2926, 3410;  $^1\text{H}$  NMR ( $\text{CDCl}_3$ , 400 MHz, HH-COSY, HSQC):  $\delta$  7.42 – 7.29 (m, 20H,  $\text{CH}_{\text{arom}}$ ), 5.58 (dd, 1H,  $J$  = 9.8, 2.6 Hz, H-1 $\alpha$ ), 5.28 (dd, 1H,  $J$  = 12.5, 4.5 Hz, H-1 $\beta$ ), 4.94 (dt, 1H,  $J$  = 50.3, 4.4 Hz, H-2 $\alpha$ ), 4.87 (d, 1H,  $J$  = 11.3 Hz,  $\text{CHH}$  Bn), 4.87 (ddd, 1H,  $J$  = 52.6, 4.1, 1.0 Hz, H-2 $\beta$ ), 4.73 (d, 1H,  $J$  = 11.9 Hz,  $\text{CHH}$  Bn), 4.68 – 4.61 (m, 3H,  $\text{CHH}$  Bn 2x $\text{CHH}$  Bn), 4.60 – 4.53 (m, 4H, 3x $\text{CHH}$  Bn, H-4 $\alpha$ ), 4.40 (ddd, 1H,  $J$  = 20.3, 7.1, 4.1 Hz, H-3 $\alpha$ ), 4.25 (td, 1H,  $J$  = 4.2, 1.8 Hz, H-3 $\beta$ ), 4.23 – 4.18 (m, 1H, H-4 $\beta$ ), 4.17 (dd, 1H,  $J$  = 12.6, 1.0 Hz, 1-OH $\beta$ ), 3.85 (dd, 1H,  $J$  = 9.7, 6.6 Hz, H-5 $\beta$ ), 3.79 (dd, 1H,  $J$  = 10.5, 3.6 Hz, H-5 $\alpha$ ), 3.76 – 3.67 (m, 2H, H-5 $\alpha$ , H-5 $\beta$ ), 3.43 (t, 1H,  $J$  = 2.9 Hz, 1-OH $\alpha$ );  $^{13}\text{C}$ -APT NMR ( $\text{CDCl}_3$ , 101 MHz, HSQC):  $\delta$  138.1, 137.8, 137.4, 137.0 ( $\text{C}_q$ ), 128.7, 128.6, 128.6, 128.5, 128.4, 128.1, 128.1, 128.0, 127.9, 127.8, 127.7 ( $\text{CH}_{\text{arom}}$ ), 99.0 (d,  $J$  = 30.5 Hz, C-1 $\alpha$ ), 95.1 (d,  $J$  = 19.2 Hz, C-1 $\beta$ ), 92.9 (d,  $J$  = 187.9 Hz, C-2 $\alpha$ ), 89.5 (d,  $J$  = 202.2 Hz, C-2 $\beta$ ), 77.7 (C-4 $\alpha$ ), 77.4 (d,  $J$  = 5.9 Hz, C-4 $\beta$ ), 76.9 (d,  $J$  = 15.0 Hz, C-3 $\alpha$ ), 76.3 (d,  $J$  = 14.6 Hz, C-3 $\beta$ ), 74.5 (d,  $J$  = 3.1 Hz,  $\text{CH}_2$  Bn), 73.8, 73.6 ( $\text{CH}_2$  Bn), 73.2 (d,  $J$  = 1.3 Hz,  $\text{CH}_2$  Bn), 70.3 (d,  $J$  = 1.2 Hz, C-5 $\alpha$ ), 68.9 (C-5 $\beta$ );  $^{19}\text{F}$  NMR ( $\text{CDCl}_3$ , 471 MHz):  $\delta$  -207.67 (ddd,  $J$  = 52.6, 20.1, 9.3 Hz, C2-F $\alpha$ ), -214.36 (d,  $J$  = 50.4 Hz, C2-F $\beta$ ); HRMS:  $[\text{M}+\text{Na}]^+$  calcd for  $\text{C}_{19}\text{H}_{21}\text{FO}_4\text{Na}$  355.13161, found 355.13164.

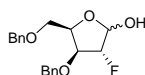

**3,5-di-O-benzyl-2-deoxy-2-fluoro- $\alpha/\beta$ -D-xylofuranose (48).** The title compound was generated from **40** (181 mg, 0.52 mmol) by the general procedure for methyl furanoside hydrolysis, conditions A (60°C, 6 h). Yield: 75%  $\alpha:\beta$  = 30:70 (0.40 mmol) as a colourless oil. Spectroscopic data were in accord with those previously reported for the L-enantiomer.<sup>13</sup> IR (thin film): 696, 735, 1026, 1047, 1454, 2868, 2924, 3400;  $^1\text{H}$  NMR ( $\text{CDCl}_3$ , 500 MHz, HH-COSY, HSQC):  $\delta$  7.37 – 7.24 (m, 10H), 5.48 (td, 0.3H,  $J$  = 8.3, 3.7 Hz, H-1 $\alpha$ ), 5.29 (dd, 0.7H,  $J$  = 13.9, 11.6 Hz, H-1 $\beta$ ), 4.95 (ddd, 0.7H,  $J$  = 52.2, 3.2, 0.8 Hz, H-2 $\beta$ ), 4.90 (dt, 0.3H,  $J$  = 52.1, 3.4 Hz, H-2 $\alpha$ ), 4.68 (d, 0.7H,  $J$  = 11.7 Hz,  $\text{CHH}$  Bn $\beta$ ), 4.65 (d, 0.3H,  $J$  = 11.9 Hz,  $\text{CHH}$  Bn $\alpha$ ), 4.60 – 4.50 (m, 3H,  $\text{CHH}$  Bn $\alpha$ ,  $\text{CHH}$  Bn $\beta$ ,  $\text{CH}_2$  Bn $\alpha$ ,  $\text{CH}_2$  Bn $\beta$ ), 4.50 – 4.46 (m, 0.3H, H-4 $\alpha$ ), 4.39 (dt, 0.7H,  $J$  = 6.1, 4.2 Hz, H-4 $\beta$ ), 4.27 (ddd, 0.3H,  $J$  = 13.2, 5.3, 3.1 Hz, H-3 $\alpha$ ), 4.23 (dddd, 0.7H,  $J$  = 17.8, 6.1, 3.0, 0.7 Hz, H-3 $\beta$ ), 4.14 (d, 0.7H,  $J$  = 11.6 Hz, 1-OH $\beta$ ), 3.73 (ddd, 0.7H,  $J$  = 10.1, 4.6, 1.2 Hz, H-5 $\beta$ ), 3.71 – 3.67 (m, 1H, H-5 $\alpha$ , H-5 $\beta$ ), 3.64 (dd, 0.3H,  $J$  = 10.2, 5.9 Hz, H-5 $\alpha$ ), 3.57 (dd, 0.3H,  $J$  = 8.5, 3.2 Hz, 1-OH $\alpha$ );  $^{13}\text{C}$ -APT NMR ( $\text{CDCl}_3$ , 126 MHz, HSQC):  $\delta$  138.1, 137.4, 137.3, 137.0 ( $\text{C}_q$ ), 128.7, 128.6, 128.6, 128.4, 128.2, 128.1, 128.0, 127.9, 127.8, 127.7 ( $\text{CH}_{\text{arom}}$ ), 101.0 (d,  $J$  = 34.4 Hz, C-1 $\beta$ ), 99.1 (d,  $J$  = 185.0 Hz, C-2 $\beta$ ), 95.6 (d,  $J$  = 17.1 Hz, C-1 $\alpha$ ), 93.8 (d,  $J$  = 191.1 Hz, C-2 $\alpha$ ), 80.9 (d,  $J$  = 24.6 Hz, C-3 $\beta$ ), 80.3 (d,  $J$  = 24.1 Hz, C-3 $\alpha$ ), 80.0 (d,  $J$  = 3.4 Hz, C-4 $\beta$ ), 77.2 (d,  $J$  = 4.1 Hz, C-4 $\alpha$ ), 73.9 ( $\text{CH}_2$  Bn $\beta$ ), 73.6 ( $\text{CH}_2$  Bn $\alpha$ ), 73.0 ( $\text{CH}_2$  Bn $\beta$ ), 72.7 ( $\text{CH}_2$  Bn $\alpha$ ), 68.4 (C-5 $\alpha$ ), 68.4 (C-5 $\beta$ );  $^{19}\text{F}$  NMR ( $\text{CDCl}_3$ , 471 MHz):  $\delta$  -189.88 (ddd, 0.7F,  $J$  = 52.2, 17.7, 14.1 Hz, F-2 $\beta$ ), -204.74 (dt, 0.3F,  $J$  = 52.2, 9.7 Hz, F-2 $\alpha$ );  $^{13}\text{C}$  HSQC-HECADE NMR ( $\text{CDCl}_3$ , 126 MHz):  $\alpha$ -anomer:  $^2J_{\text{C1,H2}} = +3.1$  Hz,  $^2J_{\text{C2,H1}} = +5.6$  Hz,  $\beta$ -anomer:  $^2J_{\text{C2,H1}} = -2.3$  Hz; HRMS:  $[\text{M}+\text{Na}]^+$  calcd for  $\text{C}_{19}\text{H}_{21}\text{FO}_4\text{Na}$  355.1322, found 355.1326.

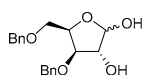

**3,5-di-O-benzyl- $\alpha/\beta$ -D-xylofuranose (S1).** Xyloside **27**<sup>10</sup> (7.6 g, 22 mmol) was dissolved in 20 mL THF and 40 mL  $\text{H}_2\text{O}$  and cooled to 0°C, followed by the slow addition of 100 mL TFA. After stirring overnight, the reaction mixture was partitioned between DCM and  $\text{H}_2\text{O}$ , and the aqueous layer was extracted three times with DCM. The combined DCM layers were washed with sat. aq.  $\text{NaHCO}_3$  and brine, dried with  $\text{MgSO}_4$ , filtered and concentrated *in vacuo*. Flash column chromatography (9/1 to 1/1 pentane/EtOAc) afforded the title compound (6.1 g, 18.5 mmol, 84%) as a waxy material of a  $\alpha:\beta$  = 70:30 anomeric composition. Spectroscopic data were in accord with those previously reported.<sup>14</sup>  $^1\text{H}$  NMR ( $\text{CDCl}_3$ , 500 MHz, HH-COSY, HSQC):  $\delta$  7.34 – 7.23 (m, 10H,  $\text{CH}_{\text{arom}}$ ), 5.44 (t, 0.7H,  $J$  = 4.8 Hz, H-1 $\alpha$ ), 5.11 (d, 0.3H,  $J$  = 10.9 Hz, H-1 $\beta$ ), 4.87 (d, 0.7H,  $J$  = 5.5 Hz, 1-OH $\alpha$ ), 4.66 – 4.53 (m, 2H, 2x $\text{CHH}$  Bn $\alpha$ , 2x $\text{CHH}$  Bn $\beta$ ), 4.52 – 4.43 (m, 2.7H, 2x $\text{CHH}$  Bn $\alpha$ , 2x $\text{CHH}$  Bn $\beta$ , H-4 $\alpha$ ), 4.40 (q, 0.3H,  $J$  = 5.2 Hz, H-4 $\beta$ ), 4.19 (t, 0.3H,  $J$  = 2.9 Hz, H-2 $\beta$ ), 4.13 – 4.08 (m, 1H, H-2 $\alpha$ , 1-OH $\beta$ ), 3.98 – 3.93 (m, 1H, H-3 $\alpha$ , H-3 $\beta$ ), 3.77 – 3.70 (m, 0.6H, H-5 $\beta$ , H-5 $\beta$ ), 3.66 – 3.64 (m, 1.4H, H-5 $\alpha$ , H-5 $\alpha$ ), 3.30 (d, 0.7H,  $J$  = 5.8 Hz, 2-OH $\alpha$ ), 3.14 (d, 0.3H,  $J$  = 4.3 Hz, 2-OH $\beta$ );  $^{13}\text{C}$ -APT NMR ( $\text{CDCl}_3$ , 126 MHz, HSQC):  $\delta$  137.9, 137.7, 137.4 ( $\text{C}_q$ ), 128.6, 128.5, 128.5, 128.5, 128.1, 128.0, 128.0, 127.9, 127.8, 127.8, 127.8, 127.6 ( $\text{CH}_{\text{arom}}$ ), 103.5 (C-1 $\beta$ ), 96.1 (C-1 $\alpha$ ), 83.6 (C-3 $\alpha$ ), 82.9 (C-3 $\beta$ ), 80.0 (C-4 $\beta$ ), 79.2 (C-2 $\beta$ ), 77.5 (C-

4 $\alpha$ ), 75.6 (C-2 $\alpha$ ), 73.7 (CH<sub>2</sub> Bn $\alpha$ ), 73.6 (CH<sub>2</sub> Bn $\beta$ ), 72.7 (CH<sub>2</sub> Bn $\alpha$ ), 72.0 (CH<sub>2</sub> Bn $\beta$ ), 69.2 (C-5), 69.1 (C-5 $\alpha$ ); HRMS: [M+Na]<sup>+</sup> calcd for C<sub>19</sub>H<sub>22</sub>O<sub>5</sub>Na 353.13594, found 353.13594.

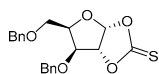

**1,2-O-thiocarbonate-3,5-di-O-benzyl- $\alpha/\beta$ -D-xylofuranose (S2).** Diol **S1** (1.65 g, 5 mmol, 1 eq.) was dissolved in 25 mL DCM and cooled to 0°C. DiPEA (7 ml, 40 mmol, 8 eq.) and DMAP (122 mg, 1 mmol, 0.2 eq.) were added, followed by the addition of thiophosgene (0.5 mL, 6.25 mmol, 1.25 eq., dissolved in 25 mL DCM).

After 15 min the reaction was complete as concluded from TLC analysis. The reaction mixture was diluted with DCM and washed with 1 M aq. HCl, sat. aq. NH<sub>4</sub>Cl, sat. aq. NaHCO<sub>3</sub>, and brine. The organic layer was dried with Na<sub>2</sub>SO<sub>4</sub>, filtered and concentrated *in vacuo*. Flash column chromatography (19/1 to 8/2 pentane/EtOAc) afforded the title compound (1.45 g, 3.9 mmol, 78%) as a light orange oil. Spectroscopic data were in accord with those previously reported.<sup>15,16</sup> <sup>1</sup>H NMR (CDCl<sub>3</sub>, 400 MHz, HH-COSY, HSQC):  $\delta$  7.38 – 7.25 (m, 10H, CH<sub>arom</sub>), 6.40 (d, 1H, *J* = 4.7 Hz, H-1), 5.08 (d, 1H, *J* = 4.7 Hz, H-2), 4.65 (d, 1H, *J* = 11.9 Hz, CHH Bn), 4.60 (d, 1H, *J* = 11.9 Hz, CHH Bn), 4.56 (d, 1H, *J* = 11.9 Hz, CHH Bn), 4.52 (d, 1H, *J* = 11.8 Hz, CHH Bn), 4.35 (td, 1H, *J* = 5.8, 3.5 Hz, H-4), 4.20 (d, 1H, *J* = 3.5 Hz, H-3), 3.78 (d, 2H, *J* = 5.8 Hz, H-5); <sup>13</sup>C-APT NMR (CDCl<sub>3</sub>, 101 MHz, HSQC):  $\delta$  189.8 (C=S), 137.6, 136.3 (C<sub>q</sub>), 128.9, 128.7, 128.6, 128.1, 128.1, 127.9 (CH<sub>arom</sub>), 107.8 (C-1), 86.0 (C-2), 80.7 (C-4), 79.4 (C-3), 73.8, 73.0 (CH<sub>2</sub> Bn), 66.5 (C-5).

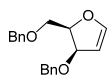

**3-benzyloxy-2-(benzyloxy)methyl-2,3-dihydrofuran (49).** Thionocarbonate **S2** (330 mg, 0.89 mmol, 1 eq.) was dissolved in toluene (1.8 mL) and heated to 70°C. When the target temperature was reached 1,3-dimethyl-2-phenyl-1,3,2-diazaphospholidine (0.18 mL, 0.98 mmol, 1.1 eq.) was added, and the reaction was continued to stir for 20 min. The reaction mixture was concentrated *in vacuo* and flash column chromatography (1/0 to 85/15 pentane/Et<sub>2</sub>O) afforded the title compound (191 mg, 0.68 mmol, 76%) as a colourless oil. Spectroscopic data were in accord with those previously reported.<sup>17</sup> <sup>1</sup>H NMR (CDCl<sub>3</sub>, 400 MHz, HH-COSY, HSQC):  $\delta$  7.38 – 7.23 (m, 10H, CH<sub>arom</sub>), 6.61 (d, 1H, *J* = 2.8 Hz, H-1), 5.24 (t, 1H, *J* = 2.6 Hz, H-2), 4.64 (d, 1H, *J* = 12.0 Hz, CHH Bn), 4.61 (ddd, 2H, *J* = 7.1, 2.5, 0.7 Hz, H-3), 4.55 (d, 1H, *J* = 12.0 Hz, CHH Bn), 4.50 – 4.44 (m, 2H, CHH Bn, H-4), 4.42 (d, 1H, *J* = 12.0 Hz, CHH Bn), 3.96 (dd, 1H, *J* = 10.6, 4.6 Hz, H-5), 3.85 (dd, 1H, *J* = 10.6, 7.7 Hz, H-5); <sup>13</sup>C-APT NMR (CDCl<sub>3</sub>, 101 MHz, HSQC):  $\delta$  150.6 (C-1), 138.5, 138.1 (C<sub>q</sub>), 128.4, 128.4, 127.8, 127.7, 127.6, 127.5 (CH<sub>arom</sub>), 101.4 (C-2), 83.3 (C-4), 79.5 (C-3), 73.6, 70.7 (CH<sub>2</sub> Bn), 67.8 (C-5).

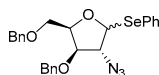

**Phenyl 2-azido-3,5-di-O-benzyl-2-deoxy-1-seleno- $\alpha/\beta$ -D-xylofuranoside (50).** Glycal **49** (314 mg, 1.11 mmol, 1 eq.) was dissolved in DCM (5.5 mL) followed by the subsequent addition of TMSN<sub>3</sub> (295  $\mu$ L, 2.22 mmol, 2 eq.), TBAF (1M solution in THF, 220  $\mu$ L, 0.22 mmol, 0.2 eq.), and *N*-(phenylseleno)phthalimide (671 mg, 2.22 mmol, 2 eq.). The reaction was stirred overnight, diluted with DCM and washed with sat. aq. NaHCO<sub>3</sub> and brine. The organic layer was dried (MgSO<sub>4</sub>), filtered and concentrated under reduced pressure. The residue was purified by flash column chromatography (1/0 to 85/15 pentane/Et<sub>2</sub>O) to give the still impure title compound (360 mg, 0.72 mmol, <65%) and was used direct in the subsequent hydrolysis (*vide infra*, **44**). The major product was confirmed as the *trans*-xylo isomer: <sup>1</sup>H NMR (CDCl<sub>3</sub>, 400 MHz, HH-COSY, NOESY, HSQC):  $\delta$  7.66 – 7.59 (m, 2H, CH<sub>arom</sub>), 7.36 – 7.27 (m, 13H, CH<sub>arom</sub>), 5.46 (d, 1H, *J* = 3.7 Hz, H-1), 4.66 (d, 1H, *J* = 11.8 Hz, CHH Bn), 4.62 – 4.53 (m, 3H, CHH Bn, CH<sub>2</sub> Bn), 4.34 (q, 1H, *J* = 5.4 Hz, H-4), 4.27 (t, 1H, *J* = 3.4 Hz, H-2), 4.01 (dd, 1H, *J* = 5.4, 3.2 Hz, H-3), 3.78 (dd, 1H, *J* = 10.2, 5.2 Hz, H-5), 3.73 (dd, 1H, *J* = 10.2, 6.0 Hz, H-5); <sup>13</sup>C-APT NMR (CDCl<sub>3</sub>, 101 MHz, HSQC):  $\delta$  138.1, 137.1 (C<sub>q</sub>), 134.3 (CH<sub>arom</sub>), 130.0 (C<sub>q</sub>), 129.2, 128.7, 128.6, 128.4, 128.1, 127.9, 127.9, 127.8, 127.8, 127.7 (CH<sub>arom</sub>), 85.7 (C-1), 81.6 (C-3), 81.1 (C-4), 73.6, 72.7 (CH<sub>2</sub> Bn), 70.1 (C-2), 68.6 (C-5); <sup>13</sup>C HSQC-HECADE NMR: <sup>2</sup>*J*<sub>C1,H2</sub> = -1.1 Hz, <sup>2</sup>*J*<sub>C2,H1</sub> = -3.1 Hz, <sup>2</sup>*J*<sub>C2,H1</sub> = -4.0 Hz. And minor products are identified as *cis*-xylo (<sup>13</sup>C HSQC-HECADE NMR (CDCl<sub>3</sub>, 126 MHz): <sup>2</sup>*J*<sub>C1,H2</sub> = +0.9 Hz, <sup>2</sup>*J*<sub>C2,H1</sub> = +1.3 Hz), and *trans*-lyxo (<sup>13</sup>C HSQC-HECADE NMR (CDCl<sub>3</sub>, 126 MHz): <sup>2</sup>*J*<sub>C1,H2</sub> = -0.7 Hz, <sup>2</sup>*J*<sub>C2,H1</sub> = -3.0 Hz).

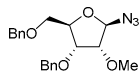

**1-Azido 3,5-di-O-benzyl-1-deoxy-2-methyl- $\beta$ -D-ribofuranoside (51).** Intermixed with **33**. (*vide supra*). <sup>1</sup>H NMR (CDCl<sub>3</sub>, 400 MHz, HH-COSY, HSQC):  $\delta$  7.34 – 7.20 (m, 10H, CH<sub>arom</sub>), 5.32 (d, 1H, *J* = 1.9 Hz, H-1), 4.60 – 4.56 (m, 2H, 2xCHH Bn), 4.53 (d, 1H, *J* = 11.9 Hz, CHH Bn), 4.51 (d, 1H, *J* = 12.2 Hz, CHH Bn), 4.29 – 4.22 (m, 1H, H-4), 4.08 (dd, 1H, *J* = 6.9, 4.6 Hz, H-3), 3.64 (dd, 1H, *J* = 10.8, 3.3 Hz, H-5), 3.52 (dd, 1H, *J* = 10.9, 4.6 Hz, H-5), 3.50 – 3.47 (m, 1H, H-2), 3.40 (s, 3H, CH<sub>3</sub> OMe); <sup>13</sup>C-APT NMR (CDCl<sub>3</sub>, 101 MHz, HSQC):  $\delta$  138.1, 137.5 (C<sub>q</sub>), 128.4, 128.4, 128.0, 127.9, 127.8, 127.6 (CH<sub>arom</sub>), 92.2 (C-1), 82.5 (C-2), 81.3 (C-4), 77.1 (C-3), 73.4, 72.7 (CH<sub>2</sub> Bn), 69.8 (C-5), 58.3 (OMe); After hydrolysis of the mixture of **51** and **33**, **3,5-di-O-benzyl-2-O-methyl- $\alpha/\beta$ -D-ribofuranose** could be isolated as a  $\alpha:\beta$  = 1:0.7 anomeric mixture. Spectroscopic data were in accord with those previously reported.<sup>18</sup> <sup>1</sup>H NMR (CDCl<sub>3</sub>, 400 MHz, HH-COSY, HSQC):  $\delta$  7.39 – 7.22 (m, 17H), 5.32 (dd, 1H, *J* = 11.2, 4.1 Hz, H-1 $\alpha$ ), 5.28 (d, 0.7H, *J* = 6.4 Hz, H-1 $\beta$ ), 4.68 (d, 1H, *J* = 11.9 Hz, CHH Bn $\alpha$ ), 4.63 (d, 0.7H, *J* = 12.0 Hz, CHH Bn $\beta$ ), 4.61 (d, 1H, *J* = 11.9 Hz, CHH Bn $\alpha$ ), 4.59 – 4.42 (m, 4.1H, CH<sub>2</sub> Bn $\alpha,\beta$ , CHH Bn $\beta$ ), 4.35 (td, 1H, *J* = 4.2, 2.4 Hz, H-4 $\alpha$ ), 4.27 – 4.17 (m, 1.4H, H-3 $\beta$ , H-4 $\beta$ ), 4.12 (d, 1H, *J* = 11.2 Hz, 1-OH $\alpha$ ), 4.01 (dd, 1H, *J* = 5.0, 2.4 Hz, H-3 $\alpha$ ), 3.78 (dd, 1H, *J* = 4.9, 4.3 Hz, H-2 $\alpha$ ), 3.67 – 3.59 (m, 2.1H, H-2 $\beta$ , H-5 $\beta$ , 1-OH $\beta$ ), 3.52 – 3.43 (m, 7.8H, CH<sub>3</sub> OMe $\alpha,\beta$ , H-5 $\beta$ , 2xH-5 $\alpha$ ); <sup>13</sup>C-APT NMR (CDCl<sub>3</sub>, 101 MHz, HSQC):  $\delta$  137.9, 137.8, 137.5, 137.4 (C<sub>q</sub>), 128.6, 128.6, 128.5, 128.5, 128.1, 128.0, 128.0, 127.9, 127.8, 127.7 (CH<sub>arom</sub>), 99.7 (C-1 $\beta$ ), 96.1 (C-1 $\alpha$ ), 83.4 (C-2 $\beta$ ), 81.0 (C-4 $\alpha$ ), 80.7 (C-3 $\beta$ ), 80.2 (C-2 $\beta$ ), 77.4 (C-3 $\alpha$ ), 77.2 (C-4 $\beta$ ), 73.6, 73.5, 72.8, 72.7 (CH<sub>2</sub> Bn), 70.0 (C-5 $\alpha$ ), 69.6 (C-5 $\beta$ ), 58.6, 58.4 (OMe); HRMS: [M+Na]<sup>+</sup> calcd for C<sub>20</sub>H<sub>24</sub>O<sub>5</sub>Na 367.15160, found 367.15164.

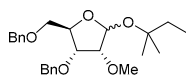

**(2-Methyl-2-butyl) 3,5-di-O-benzyl-2-methyl- $\alpha/\beta$ -D-ribofuranoside (52).** Formed as an 88:12  $\alpha/\beta$  anomeric mixture. Data for the isolated  $\alpha$ -anomer:  $[\alpha]_D^{20} = +86.3^\circ$  ( $c = 0.35$ ,  $\text{CHCl}_3$ ); IR (thin film): 698, 739, 1026, 1042, 1109, 1211, 1454, 2928, 2970;  $^1\text{H NMR}$  ( $\text{CDCl}_3$ , 500 MHz, HH-COSY, HH-NOESY, HSQC, HMBC):  $\delta$  7.37 – 7.20 (m, 10H,  $\text{CH}_{\text{arom}}$ ), 5.34 (d, 1H,  $J = 4.1$  Hz, H-1), 4.70 (d, 1H,  $J = 12.6$  Hz,  $\text{CHH Bn}$ ), 4.55 – 4.49 (m, 2H,  $\text{CHH Bn}$ ,  $\text{CHH Bn}$ ), 4.42 (d, 1H,  $J = 12.1$  Hz,  $\text{CHH Bn}$ ), 4.22 (q, 1H,  $J = 3.9$  Hz, H-4), 3.91 (dd, 1H,  $J = 6.5$ , 4.5 Hz, H-3), 3.57 (dd, 1H,  $J = 6.5$ , 4.2 Hz, H-2), 3.50 – 3.44 (m, 4H,  $\text{CH}_3$  OMe, H-5), 3.36 (dd, 1H,  $J = 10.6$ , 3.9 Hz, H-5), 1.60 (q, 2H,  $J = 7.5$  Hz,  $\text{CH}_2\text{CH}_3$  *t*-amyl), 1.26 (s, 3H,  $\text{CH}_3$  *t*-amyl), 1.24 (s, 3H,  $\text{CH}_3$  *t*-amyl), 0.93 (t, 3H,  $J = 7.5$  Hz,  $\text{CH}_2\text{CH}_3$  *t*-amyl);  $^{13}\text{C}$ -APT NMR ( $\text{CDCl}_3$ , 126 MHz, HSQC):  $\delta$  138.5, 138.2 ( $\text{C}_q$ ), 128.3, 128.2, 128.0, 127.6, 127.5, 127.5 ( $\text{CH}_{\text{arom}}$ ), 95.9 (C-1), 80.6, 80.5 (C-2, C-4), 77.0 ( $\text{C}_q$  *t*-amylOH), 75.7 (C-3), 73.3, 72.2 ( $\text{CH}_2$  Bn), 70.0 (C-5), 58.8 (OMe), 34.5 ( $\text{CH}_2$  *t*-amyl), 26.1, 25.9 ( $\text{C}_q\text{CH}_3$  *t*-amyl), 8.6 ( $\text{CH}_2\text{CH}_3$  *t*-amyl); HRMS:  $[\text{M}+\text{Na}]^+$  calcd for  $\text{C}_{25}\text{H}_{34}\text{O}_5\text{Na}$  437.22985, found 437.22953.

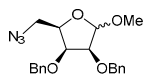

**Methyl 5-azido-2,5-di-O-benzyl-5-deoxy- $\alpha/\beta$ -D-lyxofuranoside (53).** Data for the  $\alpha$ -anomer: IR (thin film): 695, 734, 923, 1047, 1101, 1145, 1270, 1454, 2095;  $^1\text{H NMR}$  ( $\text{CDCl}_3$ , 400 MHz, HH-COSY, HSQC, HMBC):  $\delta$  7.38 – 7.24 (m, 10H,  $\text{CH}_{\text{arom}}$ ), 4.98 (d, 1H,  $J = 1.6$  Hz, H-1), 4.71 – 4.63 (m, 2H,  $2\times\text{CHH Bn}$ ), 4.59 (d, 1H,  $J = 11.9$  Hz,  $\text{CHH Bn}$ ), 4.47 (d, 1H,  $J = 11.7$  Hz,  $\text{CHH Bn}$ ), 4.29 – 4.19 (m, 2H, H-3, H-4), 3.88 (dd, 1H,  $J = 4.3$ , 1.7 Hz, H-2), 3.62 (dd, 1H,  $J = 12.8$ , 7.6 Hz, H-5), 3.45 (dd, 1H,  $J = 12.9$ , 3.8 Hz, H-5), 3.34 (s, 3H,  $\text{CH}_3$  OMe);  $^{13}\text{C}$ -APT NMR ( $\text{CDCl}_3$ , 101 MHz, HSQC, HMBC):  $\delta$  137.8 ( $\text{C}_q$ ), 128.5, 128.0, 127.9, 127.9, 127.8 ( $\text{CH}_{\text{arom}}$ ), 106.1 (C-1), 81.5 (C-2), 77.9, 77.8 (C-3, C-4), 73.2, 72.8 ( $\text{CH}_2$  Bn), 55.5 (OMe), 52.1 (C-5);  $^{13}\text{C}$  HSQC-HECADE NMR:  $^2J_{\text{C}1,\text{H}2} = -0.9$  Hz,  $^2J_{\text{C}2,\text{H}1} = -1.0$  Hz,  $^2J_{\text{C}3,\text{H}2} = +0.7$  Hz; HRMS:  $[\text{M}+\text{NH}_4]^+$  calcd for  $\text{C}_{20}\text{H}_{27}\text{N}_4\text{O}_4$  387.20268, found 387.20275. Data for the  $\beta$ -anomer:  $[\alpha]_D^{20} = -58.5^\circ$  ( $c = 0.48$ ,  $\text{CHCl}_3$ ); IR (thin film): 698, 737, 999, 1053, 1105, 1157, 1454, 2096, 2874, 2914, 3030;  $^1\text{H NMR}$  ( $\text{CDCl}_3$ , 400 MHz, HH-COSY, HSQC):  $\delta$  7.41 – 7.27 (m, 10H,  $\text{CH}_{\text{arom}}$ ), 4.89 – 4.83 (m, 2H,  $\text{CHH Bn}$ , H-1), 4.72 (d, 1H,  $J = 12.2$  Hz,  $\text{CHH Bn}$ ), 4.62 (d, 1H,  $J = 12.2$  Hz,  $\text{CHH Bn}$ ), 4.58 (d, 1H,  $J = 12.3$  Hz,  $\text{CHH Bn}$ ), 4.13 (ddd, 1H,  $J = 8.7$ , 5.9, 4.3 Hz, H-4), 4.05 (t, 1H,  $J = 5.9$  Hz, H-3), 3.83 (dd, 1H,  $J = 5.8$ , 4.5 Hz, H-2), 3.66 (dd, 1H,  $J = 13.0$ , 8.7 Hz, H-5), 3.47 (s, 3H,  $\text{CH}_3$  OMe), 3.29 (dd, 1H,  $J = 13.0$ , 4.3 Hz, H-5);  $^{13}\text{C}$ -APT NMR ( $\text{CDCl}_3$ , 101 MHz, HSQC):  $\delta$  138.1, 137.7 ( $\text{C}_q$ ), 128.6, 128.5, 128.3, 128.1, 128.0, 127.9 ( $\text{CH}_{\text{arom}}$ ), 102.0 (C-1), 79.3 (C-4), 79.0 (C-2), 75.0 (C-3), 73.8, 72.8 ( $\text{CH}_2$  Bn), 55.9 (OMe), 52.8 (C-5);  $^{13}\text{C}$  HSQC-HECADE NMR ( $\text{CDCl}_3$ , 126 MHz):  $^2J_{\text{C}1,\text{H}2} = +1.0$  Hz,  $^2J_{\text{C}2,\text{H}1} = +2.5$  Hz; HRMS:  $[\text{M}+\text{NH}_4]^+$  calcd for  $\text{C}_{20}\text{H}_{27}\text{N}_4\text{O}_4$  387.20268, found 387.20272.

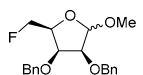

**Methyl 2,5-di-O-benzyl-5-deoxy-5-fluoro- $\alpha/\beta$ -D-lyxofuranoside (54).** Data for the  $\alpha$ -anomer: m.p. 62–64  $^\circ\text{C}$ .  $[\alpha]_D^{20} = +16.6^\circ$  ( $c = 0.62$ ,  $\text{CHCl}_3$ ); IR (thin film): 698, 737, 1009, 1026, 1069, 1107, 1150, 1454, 2922, 3032;  $^1\text{H NMR}$  ( $\text{CDCl}_3$ , 500 MHz, HH-COSY, HH-NOESY, HSQC):  $\delta$  7.36 – 7.28 (m, 10H,  $\text{CH}_{\text{arom}}$ ), 5.00 (d, 1H,  $J = 1.6$  Hz, H-1), 4.74 – 4.62 (m, 4H,  $2\times\text{CHH Bn}$ , H-5, H-5), 4.60 (d, 1H,  $J = 11.9$  Hz,  $\text{CHH Bn}$ ), 4.50 (d, 1H,  $J = 11.8$  Hz,  $\text{CHH Bn}$ ), 4.44 (dtd, 1H,  $J = 15.6$ , 6.8, 4.4 Hz, H-4), 4.30 (dd, 1H,  $J = 6.6$ , 4.6 Hz, H-3), 3.88 (dt, 1H,  $J = 4.6$ , 1.6 Hz, H-2), 3.36 (s, 3H,  $\text{CH}_3$  OMe);  $^{13}\text{C}$ -APT NMR ( $\text{CDCl}_3$ , 126 MHz, HSQC):  $\delta$  137.8, 137.7 ( $\text{C}_q$ ), 128.5, 128.5, 128.0, 127.9, 127.8, 127.8 ( $\text{CH}_{\text{arom}}$ ), 106.2 (C-1), 84.0 (d,  $J = 164.8$  Hz, C-5), 81.1 (C-2), 77.8 (d,  $J = 7.1$  Hz, C-3), 77.3 (d,  $J = 20.2$  Hz, C-4), 73.2, 72.7 ( $\text{CH}_2$  Bn), 55.5 (OMe);  $^{19}\text{F}$  NMR ( $\text{CDCl}_3$ , 471 MHz):  $\delta$  -228.75 (td,  $J = 47.6$ , 15.7 Hz);  $^{13}\text{C}$  HSQC-HECADE NMR:  $^2J_{\text{C}1,\text{H}2} = -0.8$  Hz,  $^2J_{\text{C}2,\text{H}1} = -0.8$  Hz; HRMS:  $[\text{M}+\text{NH}_4]^+$  calcd for  $\text{C}_{20}\text{H}_{27}\text{FNO}_4$  364.19186, found 364.19199. Data for the  $\beta$ -anomer:  $[\alpha]_D^{20} = -100.5^\circ$  ( $c = 0.95$ ,  $\text{CHCl}_3$ ); IR (thin film): 698, 737, 1003, 1066, 1109, 1163, 1348, 1454, 2910, 2924;  $^1\text{H NMR}$  ( $\text{CDCl}_3$ , 500 MHz, HH-COSY, HH-NOESY, HSQC):  $\delta$  7.37 – 7.27 (m, 10H,  $\text{CH}_{\text{arom}}$ ), 4.84 (dd, 1H,  $J = 4.5$ , 1.2 Hz, H-1), 4.82 (d, 1H,  $J = 12.5$  Hz,  $\text{CHH Bn}$ ), 4.70 – 4.64 (m, 2H,  $\text{CHH Bn}$ , H-5), 4.63 – 4.59 (m, 2H,  $2\times\text{CHH Bn}$ ), 4.59 – 4.52 (m, 1H, H-5), 4.28 (dddd, 1H,  $J = 14.4$ , 7.0, 6.0, 5.1 Hz, H-4), 4.11 (t, 1H,  $J = 6.0$  Hz, H-3), 3.80 (dd, 1H,  $J = 5.9$ , 4.5 Hz, H-2), 3.46 (s, 3H,  $\text{CH}_3$  OMe);  $^{13}\text{C}$ -APT NMR ( $\text{CDCl}_3$ , 126 MHz, HSQC):  $\delta$  138.2, 137.7 ( $\text{C}_q$ ), 128.6, 128.5, 128.3, 128.1, 128.0, 127.9 ( $\text{CH}_{\text{arom}}$ ), 101.7 (C-1), 83.8 (d,  $J = 165.6$  Hz, C-5), 79.1 (d,  $J = 0.9$  Hz, C-2), 78.5 (d,  $J = 21.4$  Hz, C-4), 74.7 (d,  $J = 6.0$  Hz, C-3), 73.9, 72.7 ( $\text{CH}_2$  Bn), 55.8 (OMe);  $^{19}\text{F}$  NMR ( $\text{CDCl}_3$ , 471 MHz):  $\delta$  -227.76 (td,  $J = 47.5$ , 14.4 Hz); HRMS:  $[\text{M}+\text{NH}_4]^+$  calcd for  $\text{C}_{20}\text{H}_{27}\text{FNO}_4$  364.19186, found 364.19178.

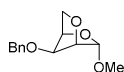

**Methyl 2,5-anhydro-3-O-benzyl- $\alpha$ -D-lyxofuranoside (55).**  $[\alpha]_D^{20} = +88.3^\circ$  ( $c = 0.41$ ,  $\text{CHCl}_3$ ); IR (thin film): 698, 741, 880, 989, 1028, 1051, 1107, 11998, 1454, 2882, 2940;  $^1\text{H NMR}$  ( $\text{CDCl}_3$ , 400 MHz, HH-COSY, HSQC):  $\delta$  7.38 – 7.28 (m, 5H,  $\text{CH}_{\text{arom}}$ ), 4.74 (s, 1H, H-1), 4.66 (d, 1H,  $J = 11.7$  Hz,  $\text{CHH Bn}$ ), 4.55 (d, 1H,  $J = 11.8$  Hz,  $\text{CHH Bn}$ ), 4.25 (d, 1H,  $J = 2.7$  Hz, H-4), 4.23 (d, 1H,  $J = 2.6$  Hz, H-3), 4.10 (s, 1H, H-2), 3.99 (d, 1H,  $J = 7.8$  Hz, H-5), 3.70 (d, 1H,  $J = 7.8$  Hz, H-5), 3.36 (s, 3H,  $\text{CH}_3$  OMe);  $^{13}\text{C}$ -APT NMR ( $\text{CDCl}_3$ , 101 MHz, HSQC):  $\delta$  137.7 ( $\text{C}_q$ ), 128.6, 128.1, 127.9 ( $\text{CH}_{\text{arom}}$ ), 106.2 (C-1), 78.6 (C-3), 76.7 (C-2), 75.0 (C-4), 72.5, 70.9 ( $\text{CH}_2$  Bn), 55.5 (OMe); HRMS:  $[\text{M}+\text{NH}_4]^+$  calcd for  $\text{C}_{13}\text{H}_{20}\text{NO}_4$  254.13868, found 254.13878.

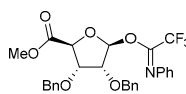

**Methyl (2,3-di-O-benzyl-1-O-(*N*-[phenyl]trifluoroacetimidoyl)- $\beta$ -D-ribofuranosyl uronate) (1).** The title compound was generated from **21** (1.0 g, 2.8 mmol) by the general procedure for imidate donor synthesis, conditions A. Yield: 85%  $\beta$  only (1.26 g, 2.38 mmol) as a white solid. Rf: 0.54 (7/3 pentane/Et<sub>2</sub>O).  $[\alpha]_D^{20} = +18.6^\circ$  ( $c = 0.90$ ,  $\text{CHCl}_3$ ); IR (thin film): 696, 1090, 1146, 1206, 1456, 1717, 1740;  $^1\text{H NMR}$  ( $\text{CDCl}_3$ , 500 MHz, HH-COSY, HSQC):  $\delta$  7.35 – 7.25 (m, 12H,  $\text{CH}_{\text{arom}}$ ), 7.08 (t, 1H,  $J = 7.5$  Hz, NPh), 6.81 (d, 2H,  $J = 7.5$  Hz, NPh), 6.29 (bs, 1H, H-1), 4.72 (d, 1H,  $J = 6.4$  Hz, H-4), 4.68 – 4.63 (m, 3H,  $\text{CH}_2$  Bn,  $\text{CHH Bn}$ ), 4.62 (d, 1H,  $J = 11.8$  Hz,  $\text{CHH Bn}$ ), 4.43 (dd, 1H,  $J = 6.3$ , 4.7 Hz, H-3), 4.09 (d, 1H,  $J = 4.5$  Hz, H-2), 3.76 (s, 3H,  $\text{CH}_3$  OMe);  $^{13}\text{C}$ -APT NMR ( $\text{CDCl}_3$ , 126 MHz, HSQC):  $\delta$  170.9 (C=O), 143.9 ( $\text{C}_q$  NPh), 137.5, 137.4 ( $\text{C}_q$  Bn), 128.9, 128.7, 128.6, 128.2, 128.2, 128.1, 128.1, 124.5, 119.7 ( $\text{CH}_{\text{arom}}$ ), 116.11 (q,  $J = 285.8$  Hz,

CF<sub>3</sub>), 102.6 (C-1), 81.2 (C-4), 80.3 (C-3), 79.7 (C-2), 73.3, 73.0 (CH<sub>2</sub> Bn), 52.5 (CH<sub>3</sub> CO<sub>2</sub>Me); <sup>19</sup>F NMR (CDCl<sub>3</sub>, 471 MHz): δ -66.62; HRMS: [M+H]<sup>+</sup> calcd for C<sub>28</sub>H<sub>27</sub>F<sub>3</sub>NO<sub>6</sub> 530.17850, found 530.17802.

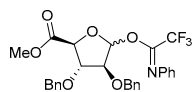

**Methyl (2,3-di-O-benzyl-1-O-(N-[phenyl]trifluoroacetimidoyl)-α/β-D-arabinofuranosyl uronate) (2).** The title compound was generated from **22** (466 mg, 1.3 mmol) by the general procedure for imidate donor synthesis, conditions A. Yield: 97%, α:β = 1:1.2 (670 mg, 1.27 mmol) as a white solid. Rf: 0.51 (8/2 pentane/Et<sub>2</sub>O). IR (thin film): 696, 1074, 1105, 1318, 1712, 1769; <sup>1</sup>H NMR (CDCl<sub>3</sub>, T = 323 K, 500 MHz, HH-COSY, HSQC): δ 7.35 – 7.20 (m, 24H, CH<sub>arom</sub>), 7.10 – 7.02 (m, 2H, NPh), 6.79 (d, 2H, J = 7.7 Hz, NPh), 6.77 – 6.74 (m, 2H, NPh), 6.41 (bs, 1H, H-1<sub>β</sub>), 6.29 (bs, 1H, H-1<sub>α</sub>), 4.82 (d, 1H, J = 3.8 Hz, H-4<sub>β</sub>), 4.76 (d, 1H, J = 11.8 Hz, CHH Bn), 4.72 – 4.61 (m, 4H, CH<sub>2</sub> Bn, CHH Bn, CHH Bn), 4.60 – 4.53 (m, 4H, CH<sub>2</sub> Bn, H-3<sub>α</sub>, H-4<sub>α</sub>), 4.50 (d, 1H, J = 12.0 Hz, CHH Bn), 4.29 (d, 1H, J = 3.1 Hz, H-3<sub>β</sub>), 4.24 – 4.18 (m, 2H, H-2<sub>α</sub>, H-2<sub>β</sub>), 3.74 (s, 3H, CH<sub>3</sub> CO<sub>2</sub>Me), 3.73 (s, 3H, CH<sub>3</sub> CO<sub>2</sub>Me); <sup>13</sup>C-APT NMR (CDCl<sub>3</sub>, T = 323 K, 126 MHz, HSQC): δ 170.7, 169.6 (C=O), 144.0, 143.8, 137.8, 137.5, 137.4, 137.1 (C<sub>q</sub>), 128.8, 128.7, 128.6, 128.6, 128.5, 128.5, 128.2, 128.1, 128.0, 128.0, 127.9, 127.9, 127.8, 124.5, 124.2, 119.8, 119.6 (CH<sub>arom</sub>), 116.1 (q, J = 286.7 Hz, CF<sub>3</sub>), 116.1 (q, J = 286.5 Hz, CF<sub>3</sub>), 104.0 (C-1<sub>α</sub>), 97.3 (C-1<sub>β</sub>), 85.2, 85.2 (C-2<sub>β</sub>, C-3<sub>α</sub>), 84.0 (C-2<sub>α</sub>), 83.7 (C-3<sub>β</sub>), 83.3 (C-4<sub>α</sub>), 80.9 (C-4<sub>β</sub>), 73.4, 73.0, 72.4, 72.2 (CH<sub>2</sub> Bn), 52.5 (OMe); <sup>19</sup>F NMR (CDCl<sub>3</sub>, 471 MHz): δ -66.18; HRMS: [M+Na]<sup>+</sup> calcd for C<sub>28</sub>H<sub>26</sub>F<sub>3</sub>NO<sub>6</sub>Na 552.16044, found 552.16010.

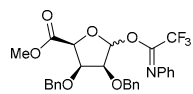

**Methyl (2,3-di-O-benzyl-1-O-(N-[phenyl]trifluoroacetimidoyl)-α/β-D-lyxofuranosyl uronate) (3).** The title compound was generated from **23** (1.05 g, 2.90 mmol) by the general procedure for imidate donor synthesis, conditions A. Yield: 85% as two separate anomers (487 mg, 0.92 mmol α and 105 mg, 0.20 mmol β respectively) as colourless oils. Rf: 0.24 and 0.69 (8/2 pentane/Et<sub>2</sub>O). Data for the α-anomer: [α]<sub>D</sub><sup>20</sup> = -5.5° (c = 1.23, CHCl<sub>3</sub>); IR (thin film): 696, 1026, 1101, 1159, 1207, 1327, 1707, 1734, 1770; <sup>1</sup>H NMR (CDCl<sub>3</sub>, T = 323 K, 500 MHz, HH-COSY, HSQC): δ 7.33 – 7.22 (m, 12H, CH<sub>arom</sub>), 7.10 – 7.02 (m, 1H, NPh), 6.80 (d, 2H, J = 7.5 Hz, NPh), 6.49 (bs, 1H, H-1), 4.81 (d, 1H, J = 5.3 Hz, H-4), 4.71 (d, 1H, J = 11.7 Hz, CHH Bn), 4.66 (s, 2H, CH<sub>2</sub> Bn), 4.61 (d, 1H, J = 11.7 Hz, CHH Bn), 4.43 (t, 1H, J = 5.1 Hz, H-3), 4.20 (dd, 1H, J = 4.6, 2.7 Hz, H-2), 3.68 (s, 3H, CH<sub>3</sub> CO<sub>2</sub>Me); <sup>13</sup>C-APT NMR (CDCl<sub>3</sub>, T = 323 K, 126 MHz, HSQC): δ 167.9 (C=O), 143.7 (C<sub>q</sub> NPh), 143.1 (q, J = 36.2 Hz, CF<sub>3</sub>-C=N), 137.7, 137.3 (C<sub>q</sub> Bn), 128.8, 128.5, 128.4, 128.1, 127.9, 127.8, 124.5, 119.7, (CH<sub>arom</sub>), 116.1 (q, J = 285.8 Hz, CF<sub>3</sub>), 103.5 (C-1), 82.0 (C-2), 79.7 (C-4), 78.4 (C-3), 73.9, 73.0 (CH<sub>2</sub> Bn), 52.1 (CH<sub>3</sub> CO<sub>2</sub>Me); HRMS: [M+NH<sub>4</sub>]<sup>+</sup> calcd for C<sub>28</sub>H<sub>30</sub>F<sub>3</sub>N<sub>2</sub>O<sub>6</sub> 547.20505, found 547.20459. Data for the β-anomer: [α]<sub>D</sub><sup>20</sup> = -66.4° (c = 0.70, CHCl<sub>3</sub>); IR (thin film): 696, 1074, 1086, 1144, 1327, 1715, 1769; <sup>1</sup>H NMR (CDCl<sub>3</sub>, T = 323 K, 500 MHz, HH-COSY, HSQC): δ 7.35 – 7.25 (m, 10H, CH<sub>arom</sub>), 7.25 – 7.19 (m, 3H, NPh), 7.09 – 6.99 (m, 1H, NPh), 6.79 (d, 2H, J = 7.7 Hz, NPh), 6.40 (bs, 1H, H-1), 4.89 (d, 1H, J = 11.7 Hz, CHH Bn), 4.74 (d, 1H, J = 5.5 Hz, H-4), 4.69 (d, 1H, J = 12.1 Hz, CHH Bn), 4.66 (d, 1H, J = 12.0 Hz, CHH Bn), 4.62 (d, 1H, J = 11.7 Hz, CHH Bn), 4.39 (t, 1H, J = 5.3 Hz, H-3), 3.98 (t, 1H, J = 4.6 Hz, H-2), 3.64 (s, 3H, CH<sub>3</sub> CO<sub>2</sub>Me); <sup>13</sup>C-APT NMR (CDCl<sub>3</sub>, T = 323 K, 126 MHz, HSQC): δ 168.3 (C=O), 144.4 (C<sub>q</sub> NPh), 138.4, 137.4 (C<sub>q</sub> Bn), 128.7, 128.7, 128.2, 128.2, 127.7, 127.4, 127.3, 124.0, 119.8 (CH<sub>arom</sub>), 116.3 (q, J = 286.8 Hz, CF<sub>3</sub>), 96.4 (C-1), 81.1 (C-4), 79.9 (C-2), 76.4 (C-3), 74.2, 73.3 (CH<sub>2</sub> Bn), 52.0 (CH<sub>3</sub> CO<sub>2</sub>Me); HRMS: [M+H]<sup>+</sup> calcd for C<sub>28</sub>H<sub>27</sub>F<sub>3</sub>NO<sub>6</sub> 530.17850, found 530.17835.

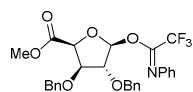

**Methyl (2,3-di-O-benzyl-1-O-(N-[phenyl]trifluoroacetimidoyl)-β-D-xylofuranosyl uronate) (4).** The title compound was generated from **24** (1.20 g, 3.0 mmol) by the general procedure for imidate donor synthesis, conditions A. Yield: 81% β only (561 mg, 1.06 mmol) as a colourless oil. Rf: 0.28 (8/2 pentane/Et<sub>2</sub>O). [α]<sub>D</sub><sup>20</sup> = +10.2° (c = 0.55, CHCl<sub>3</sub>); IR (thin film): 696, 1105, 1159, 1207, 1325, 1717, 1732, 1771; <sup>1</sup>H NMR (CDCl<sub>3</sub>, T = 323 K, 500 MHz, HH-COSY, HSQC): δ 7.34 – 7.22 (m, 12H, CH<sub>arom</sub>), 7.15 – 7.02 (m, 1H, NPh), 6.82 (d, 1H, J = 7.5 Hz, NPh), 6.32 (bs, 1H, H-1), 5.00 (d, 1H, J = 6.0 Hz, H-4), 4.57 (d, 1H, J = 12.0 Hz, CHH Bn), 4.55 – 4.50 (m, 3H, CH<sub>2</sub> Bn, CHH Bn), 4.32 (dd, 1H, J = 6.0, 1.2 Hz, H-3), 4.23 (s, 1H, H-2), 3.72 (s, 3H, CH<sub>3</sub> CO<sub>2</sub>Me); <sup>13</sup>C-APT NMR (CDCl<sub>3</sub>, T = 323 K, 126 MHz, HSQC): δ 168.6 (C=O), 144.1 (C<sub>q</sub> NPh), 137.5, 137.1 (C<sub>q</sub> Bn), 128.8, 128.7, 128.5, 128.3, 128.0, 127.9, 127.6, 124.2, 119.8 (CH<sub>arom</sub>), 116.1 (q, J = 286.8 Hz, CF<sub>3</sub>), 103.3 (C-1), 84.0 (C-2), 82.9 (C-4), 82.0 (C-3), 73.1, 72.5 (CH<sub>2</sub> Bn), 52.0 (CH<sub>3</sub> CO<sub>2</sub> Me); HRMS: [M+Na]<sup>+</sup> calcd for C<sub>28</sub>H<sub>26</sub>F<sub>3</sub>NO<sub>6</sub>Na 552.16044, found 552.15999.

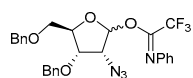

**2-azido-3,5-di-O-benzyl-2-deoxy-1-O-(N-[phenyl]trifluoroacetimidoyl)-α/β-D-ribofuranoside (5).** The title compound was generated from **41** by the general procedure for imidate donor synthesis, conditions A. Yield: 77% α:β = 1:8 as separate anomers (0.085 mmol and 0.69 mmol respectively) as a white solid. Data for the α-anomer: [α]<sub>D</sub><sup>20</sup> = +52.4° (c = 0.46, CHCl<sub>3</sub>); IR (thin film): 696, 1101, 1144, 1161, 1207, 1319, 1713, 2114, 2864; <sup>1</sup>H NMR (CDCl<sub>3</sub>, 500 MHz, HH-COSY, HSQC): δ 7.36 – 7.25 (m, 10H, CH<sub>arom</sub>), 7.25 – 7.21 (m, 2H, CH<sub>arom</sub>), 7.11 – 7.05 (m, 1H, NPh), 6.87 (d, 2H, J = 7.7 Hz, NPh), 6.45 (bs, 1H, H-1), 4.74 (d, 1H, J = 12.2 Hz, CHH Bn), 4.61 (d, 1H, J = 12.2 Hz, CHH Bn), 4.49 (d, 1H, J = 12.0 Hz, CHH Bn), 4.45 – 4.40 (m, 2H, CHH Bn, H-4), 4.18 (dd, 1H, J = 6.6, 3.1 Hz, H-3), 3.63 – 3.58 (m, 1H, H-2), 3.51 (dd, 1H, J = 10.8, 3.7 Hz, H-5), 3.45 (dd, 1H, J = 10.7, 3.3 Hz, H-5); <sup>13</sup>C-APT NMR (CDCl<sub>3</sub>, 126 MHz, HSQC): δ 144.0 (C<sub>q</sub> NPh), 137.8, 137.7 (C<sub>q</sub> Bn), 128.9, 128.6, 128.6, 128.0, 127.8, 124.5, 119.9 (CH<sub>arom</sub>), 99.9 (C-1), 84.8 (C-4), 78.3 (C-3), 73.9, 73.1 (CH<sub>2</sub> Bn), 69.6 (C-5), 61.4 (C-2); HRMS: [M+Na]<sup>+</sup> calcd for C<sub>27</sub>H<sub>25</sub>F<sub>3</sub>N<sub>4</sub>O<sub>4</sub>Na 549.17201, found 549.17174. Data for the β-anomer: [α]<sub>D</sub><sup>20</sup> = -1.6° (c = 0.70, CHCl<sub>3</sub>); IR (thin film): 696, 1090, 1144, 1159, 1207, 1331, 1715, 2108, 2862; <sup>1</sup>H NMR (CDCl<sub>3</sub>, 500 MHz, HH-COSY, HSQC): δ 7.35 – 7.24 (m, 12H, CH<sub>arom</sub>), 7.08 (t, 1H, J = 7.4 Hz, NPh), 6.80 (d, 2H, J = 7.7 Hz, NPh), 6.18 (bs, 1H, H-1), 4.64 (d, 1H, J = 11.6

H<sub>z</sub>, *CHH* Bn), 4.58 (d, 1H, *J* = 11.6 Hz, *CHH* Bn), 4.56 (d, 1H, *J* = 12.2 Hz, *CHH* Bn), 4.53 (d, 1H, *J* = 12.1 Hz, *CHH* Bn), 4.39 (dd, 1H, *J* = 7.0, 5.0 Hz, H-3), 4.33 (dt, 1H, *J* = 7.0, 4.3 Hz, H-4), 4.03 (d, 1H, *J* = 5.0 Hz, H-2), 3.64 (dd, 1H, *J* = 10.9, 4.0 Hz, H-5), 3.57 (dd, 1H, *J* = 10.9, 4.7 Hz, H-5); <sup>13</sup>C-APT NMR (CDCl<sub>3</sub>, 126 MHz, HSQC): δ 143.7 (C<sub>q</sub> NPh), 138.1, 137.2 (C<sub>q</sub> Bn), 128.9, 128.7, 128.5, 128.3, 128.1, 127.8, 127.8, 124.6, 119.7 (CH<sub>arom</sub>), 116.06 (q, *J* = 286.0 Hz, CF<sub>3</sub>), 102.5 (C-1), 82.6 (C-4), 79.0 (C-3), 73.6, 73.6 (CH<sub>2</sub> Bn), 70.0 (C-5), 64.8 (C-2); HRMS: [2M+NH<sub>4</sub>]<sup>+</sup> calcd for C<sub>54</sub>H<sub>54</sub>F<sub>6</sub>N<sub>9</sub>O<sub>8</sub> 1070.39941, found 1070.40023.

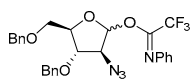

**2-azido-3,5-di-O-benzyl-2-deoxy-1-O-(*N*-[phenyl]trifluoroacetimidoyl)-α/β-D-arabinofuranoside (6).** The title compound was generated from **42** by the general procedure for imidate donor synthesis, conditions B. Yield: 71% α:β = 1.6:1 as separate anomers (0.31 mmol and 0.19 mmol respectively) as colourless oils.

Data for the α-anomer: [α]<sub>D</sub><sup>20</sup> = +5.4° (*c* = 0.50, CHCl<sub>3</sub>); IR (thin film): 696, 929, 1103, 1161, 1207, 1329, 1456, 1700, 1717, 2106, 2866, 3032; <sup>1</sup>H NMR (CDCl<sub>3</sub>, *T* = 323 K, 500 MHz, HH-COSY, HSQC): δ 7.38 – 7.22 (m, 12H, CH<sub>arom</sub>), 7.08 (t, 1H, *J* = 7.5 Hz, NPh), 6.82 (d, 2H, *J* = 7.7 Hz, NPh), 6.18 (bs, 1H, H-1), 4.63 – 4.56 (m, 2H, CH<sub>2</sub> Bn), 4.56 (d, 1H, *J* = 12.1 Hz, *CHH* Bn), 4.51 (d, 1H, *J* = 12.1 Hz, *CHH* Bn), 4.42 (q, 1H, *J* = 4.6 Hz, H-4), 4.17 (d, 1H, *J* = 2.2 Hz, H-2), 4.00 (dd, 1H, *J* = 6.0, 3.1 Hz, H-3), 3.64 (dd, 1H, *J* = 11.0, 4.2 Hz, H-5), 3.61 (dd, 1H, *J* = 11.0, 4.8 Hz, H-5); <sup>13</sup>C-APT NMR (CDCl<sub>3</sub>, *T* = 323 K, 126 MHz, HSQC): δ 143.7 (C<sub>q</sub> NPh), 138.0, 137.4 (C<sub>q</sub> Bn), 128.9, 128.7, 128.5, 128.2, 127.9, 127.9, 127.9, 124.6, 119.8 (CH<sub>arom</sub>), 116.1 (q, *J* = 286.7 Hz, CF<sub>3</sub>), 104.0 (C-1), 84.2 (C-4), 83.4 (C-3), 73.7, 73.0 (CH<sub>2</sub> Bn), 70.8 (C-5), 68.9 (C-2); HRMS: [2M+NH<sub>4</sub>]<sup>+</sup> calcd for C<sub>54</sub>H<sub>54</sub>F<sub>6</sub>N<sub>9</sub>O<sub>8</sub> 1070.39941, found 1070.40019. Data for the β-anomer: [α]<sub>D</sub><sup>20</sup> = -56.1° (*c* = 1.30, CHCl<sub>3</sub>); IR (thin film): 696, 1024, 1094, 1144, 1161, 1207, 1317, 1713, 2110, 2864; <sup>1</sup>H NMR (CDCl<sub>3</sub>, *T* = 323 K, 500 MHz, HH-COSY, HSQC): δ 7.36 – 7.22 (m, 12H, CH<sub>arom</sub>), 7.12 – 7.03 (m, 1H, NPh), 6.81 (d, 2H, *J* = 7.5 Hz, NPh), 6.43 (bs, 1H, H-1), 4.67 (d, 1H, *J* = 11.7 Hz, *CHH* Bn), 4.63 (d, 1H, *J* = 11.7 Hz, *CHH* Bn), 4.59 – 4.52 (m, 2H, CH<sub>2</sub> Bn), 4.26 (q, 1H, *J* = 5.6 Hz, H-4), 4.21 (dd, 1H, *J* = 7.5, 6.0 Hz, H-3), 4.04 (dd, 1H, *J* = 7.5, 4.5 Hz, H-2), 3.63 – 3.53 (m, 2H, H-5); <sup>13</sup>C-APT NMR (CDCl<sub>3</sub>, *T* = 323 K, 126 MHz, HSQC): δ 143.8 (C<sub>q</sub> NPh), 138.0, 137.5 (C<sub>q</sub> Bn), 128.9, 128.7, 128.6, 128.2, 128.0, 127.9, 127.9, 124.5, 119.6 (CH<sub>arom</sub>), 116.1 (d, *J* = 286.6 Hz, CF<sub>3</sub>), 98.6 (C-1), 82.9 (C-4), 81.5 (C-3), 73.7, 73.1 (CH<sub>2</sub> Bn), 70.9 (C-5), 67.4 (C-2); HRMS: [M+NH<sub>4</sub>]<sup>+</sup> calcd for C<sub>27</sub>H<sub>29</sub>F<sub>3</sub>N<sub>5</sub>O<sub>4</sub> 544.21662, found 544.21623.

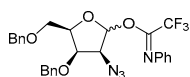

**2-azido-3,5-di-O-benzyl-2-deoxy-1-O-(*N*-[phenyl]trifluoroacetimidoyl)-α/β-D-lyxofuranoside (7).** The title compound was generated from **43** by the general procedure for imidate donor synthesis, conditions B. Yield: 67% α:β = 1:1.2 (0.30 mmol and 0.37 mmol respectively) as colourless oils. Data for the α-anomer:

[α]<sub>D</sub><sup>20</sup> = -57.5° (*c* = 0.69, CHCl<sub>3</sub>); IR (thin film): 696, 1045, 1098, 1144, 1207, 1323, 1714, 2112, 2866, 2926; <sup>1</sup>H NMR (CDCl<sub>3</sub>, *T* = 323 K, 500 MHz, HH-COSY, HSQC): δ 7.37 – 7.22 (m, 12H, CH<sub>arom</sub>), 7.11 – 7.03 (m, 1H, NPh), 6.82 (d, 2H, *J* = 7.5 Hz, NPh), 6.27 (bs, 1H, H-1), 4.71 (d, 1H, *J* = 11.5 Hz, *CHH* Bn), 4.59 (d, 1H, *J* = 11.6 Hz, *CHH* Bn), 4.56 (d, 1H, *J* = 12.0 Hz, *CHH* Bn), 4.53 – 4.47 (m, 2H, *CHH* Bn, H-4), 4.41 (t, 1H, *J* = 5.5 Hz, H-3), 4.02 (dd, 1H, *J* = 5.1, 1.9 Hz, H-1), 3.81 (dd, 1H, *J* = 10.4, 5.4 Hz, H-5), 3.71 (dd, 1H, *J* = 10.4, 6.5 Hz, H-5); <sup>13</sup>C-APT NMR (CDCl<sub>3</sub>, *T* = 323 K, 126 MHz, HSQC): δ 143.7 (C<sub>q</sub> NPh), 138.2, 137.2 (C<sub>q</sub> Bn), 128.9, 128.7, 128.5, 128.2, 127.9, 127.9, 127.8, 124.6, 119.7 (CH<sub>arom</sub>), 116.2 (q, *J* = 286.9 Hz, CF<sub>3</sub>), 102.3 (C-1), 80.7 (C-4), 78.6 (C-3), 74.4, 73.7 (CH<sub>2</sub> Bn), 68.7 (C-5), 66.2 (C-2); HRMS: [M+NH<sub>4</sub>]<sup>+</sup> calcd for C<sub>27</sub>H<sub>29</sub>F<sub>3</sub>N<sub>5</sub>O<sub>4</sub> 544.21662, found 544.21667. Data for the β-anomer: [α]<sub>D</sub><sup>20</sup> = +24.9° (*c* = 0.68, CHCl<sub>3</sub>); IR (thin film): 696, 1094, 1144, 1153, 1207, 1319, 1717, 2110, 2926; <sup>1</sup>H NMR (CDCl<sub>3</sub>, *T* = 323 K, 500 MHz, HH-COSY, HSQC): δ 7.37 – 7.21 (m, 12H, CH<sub>arom</sub>), 7.10 – 7.02 (m, 1H, NPh), 6.84 (d, 2H, *J* = 7.5 Hz, NPh), 6.41 (bs, 1H, H-1), 4.83 (d, 1H, *J* = 11.7 Hz, *CHH* Bn), 4.66 (d, 1H, *J* = 11.7 Hz, *CHH* Bn), 4.51 (d, 1H, *J* = 11.8 Hz, *CHH* Bn), 4.46 (d, 1H, *J* = 11.8 Hz, *CHH* Bn), 4.36 (q, 1H, *J* = 6.3 Hz, H-4), 4.26 (t, 1H, *J* = 5.4 Hz, H-3), 3.82 (dd, 1H, *J* = 9.9, 6.7 Hz, H-5), 3.70 (dd, 1H, *J* = 9.9, 6.2 Hz, H-5), 3.51 (t, 1H, *J* = 4.9 Hz, H-2); <sup>13</sup>C-APT NMR (CDCl<sub>3</sub>, *T* = 323 K, 126 MHz, HSQC): δ 143.9 (C<sub>q</sub> NPh), 138.1, 137.6 (C<sub>q</sub> Bn), 128.8, 128.5, 128.5, 127.9, 127.8, 127.5, 124.4, 119.7 (CH<sub>arom</sub>), 116.2 (q, *J* = 286.3 Hz, CF<sub>3</sub>), 98.5 (C-1), 82.2 (C-4), 77.7 (C-3), 74.7, 73.8 (CH<sub>2</sub> Bn), 69.0 (C-5), 62.2 (C-2); HRMS: [2M+NH<sub>4</sub>]<sup>+</sup> calcd for C<sub>54</sub>H<sub>54</sub>F<sub>6</sub>N<sub>9</sub>O<sub>8</sub> 1070.39941, found 1070.39931.

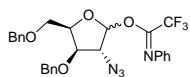

**2-azido-3,5-di-O-benzyl-2-deoxy-1-O-(*N*-[phenyl]trifluoroacetimidoyl)-α/β-D-xylofuranoside (8).** The title compound was generated from **44** by the general procedure for imidate donor synthesis, conditions A. Yield: 100% α:β = 1:1 (0.33 mmol) as a colourless oil. IR (thin film): 696, 1044, 1099, 1143, 1207, 1321,

1712, 2114; <sup>1</sup>H NMR (CDCl<sub>3</sub>, *T* = 323 K, 500 MHz, HH-COSY, HSQC): δ 7.36 – 7.23 (m, 24H, CH<sub>arom</sub>), 7.10 – 7.06 (m, 2H, NPh), 6.84 (d, 2H, *J* = 7.7 Hz, NPh), 6.80 (d, 2H, *J* = 7.6 Hz, NPh), 6.43 (bs, 1H, H-1<sub>α</sub>), 6.15 (bs, 1H, H-1<sub>β</sub>), 4.69 (d, 1H, *J* = 11.7 Hz, *CHH* Bn), 4.64 – 4.57 (m, 4H, CH<sub>2</sub> Bn, *CHH* Bn, *CHH* Bn), 4.56 – 4.50 (m, 4H, CH<sub>2</sub> Bn, *CHH* Bn, H-4<sub>β</sub>), 4.50 – 4.45 (m, 1H, H-4<sub>α</sub>), 4.32 (t, 1H, *J* = 6.7 Hz, H-3<sub>α</sub>), 4.22 (bs, 1H, H-2<sub>β</sub>), 4.17 – 4.11 (m, 1H, H-2<sub>α</sub>), 4.08 (dd, 1H, *J* = 5.8, 2.8 Hz, H-3<sub>β</sub>), 3.85 (dd, 1H, *J* = 10.5, 5.3 Hz, H-5<sub>β</sub>), 3.76 (dd, 1H, *J* = 10.5, 6.5 Hz, H-5<sub>β</sub>), 3.71 (dd, 1H, *J* = 10.7, 4.4 Hz, H-5<sub>α</sub>), 3.61 (dd, 1H, *J* = 10.7, 4.9 Hz, H-5<sub>α</sub>); <sup>13</sup>C-APT NMR (CDCl<sub>3</sub>, *T* = 323 K, 126 MHz, HSQC): δ 143.8, 143.8 (C<sub>q</sub> NPh), 138.3, 138.2, 137.4, 137.4 (C<sub>q</sub> Bn), 128.9, 128.9, 128.7, 128.5, 128.5, 128.3, 128.3, 127.9, 127.9, 127.8, 127.8, 127.8, 127.8, 124.5, 119.8, 119.7 (CH<sub>arom</sub>), 103.2 (C-1<sub>β</sub>), 98.4 (C-1<sub>α</sub>), 82.7 (C-4<sub>β</sub>), 81.6 (C-3<sub>β</sub>), 79.1 (C-3<sub>α</sub>), 73.8 (C-4<sub>α</sub>), 73.8, 73.6, 73.3 (CH<sub>2</sub> Bn), 69.1 (C-2<sub>β</sub>), 69.0 (C-5<sub>β</sub>), 68.5 (C-5<sub>α</sub>), 66.7 (C-2<sub>α</sub>); HRMS: only mass of hydrolysis found [M+Na]<sup>+</sup> calcd for C<sub>19</sub>H<sub>21</sub>N<sub>3</sub>O<sub>4</sub>Na 378.1430, found 378.1433.

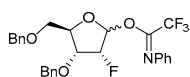

**3,5-di-O-benzyl-2-deoxy-2-fluoro-1-O-(*N*-[phenyl]trifluoroacetimidoyl)-α/β-D-ribofuranoside (9).** The title compound was generated from **45** by the general procedure for imidate donor synthesis, conditions A.

Yield: 98%  $\beta$  only (0.45 mmol) as a white solid, includes ~10% acetamide. IR (thin film): 694, 1092, 1151, 1207, 1712, 2869;  $^1\text{H}$  NMR ( $\text{CDCl}_3$ ,  $T = 328$  K, 400 MHz, HH-COSY, HSQC):  $\delta$  7.36 – 7.21 (m, 12H,  $\text{CH}_{\text{arom}}$ ), 7.11 – 7.04 (m, 1H, NPh), 6.79 (d, 2H,  $J = 8.2$  Hz, NPh), 6.36 (d, 1H,  $J = 9.1$  Hz, H-1), 4.95 (dd, 1H,  $J = 52.3$ , 3.5 Hz, H-2), 4.66 (d, 1H,  $J = 11.6$  Hz,  $\text{CHH}$  Bn), 4.60 – 4.49 (m, 3H,  $\text{CH}_2$  Bn,  $\text{CHH}$  Bn), 4.38 (dt, 1H,  $J = 7.6$ , 3.9 Hz, H-4), 4.24 (ddd, 1H,  $J = 23.6$ , 7.6, 3.6 Hz, H-3), 3.69 (dd, 1H,  $J = 11.1$ , 3.1 Hz, H-5), 3.58 (dd, 1H,  $J = 11.1$ , 4.4 Hz, H-5);  $^{13}\text{C}$ -APT NMR ( $\text{CDCl}_3$ ,  $T = 328$  K, 101 MHz, HSQC):  $\delta$  143.6 ( $\text{C}_q$  NPh), 138.2, 137.3 ( $\text{C}_q$  Bn), 129.4, 128.8, 128.6, 128.5, 128.2, 128.0, 127.8, 127.7, 124.6, 119.6 ( $\text{CH}_{\text{arom}}$ ), 116.0 (q,  $J = 286.1$  Hz,  $\text{CF}_3$ ), 101.2 (d,  $J = 32.4$  Hz, C-1), 91.0 (d,  $J = 188.6$  Hz, C-2), 82.0 (C-4), 77.0 (d,  $J = 15.7$  Hz, C-3), 73.5, 73.2 ( $\text{CH}_2$  Bn), 69.7 (C-5);  $^{19}\text{F}$  NMR ( $\text{CDCl}_3$ ,  $T = 298$  K, 471 MHz):  $\delta$  -65.81 (bs, 3F,  $\text{CF}_3$ ), -209.42 (ddd, 1F,  $J = 52.3$ , 23.9, 9.4 Hz); HRMS:  $[\text{M}+\text{H}]^+$  calcd for  $\text{C}_{27}\text{H}_{26}\text{F}_4\text{NO}_4$  504.17925, found 504.17889.

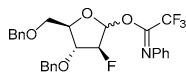

**3,5-di-O-benzyl-2-deoxy-2-fluoro-1-O-(N-phenyltrifluoroacetimidoyl)- $\alpha/\beta$ -D-arabinofuranoside (10).** The title compound was generated from **46** by the general procedure for imidate donor synthesis, conditions A. Yield: 85%  $\alpha:\beta = 5:1$  as separate anomers (0.14 mmol and 0.60 mmol respectively) as colourless oils.

Data for the  $\alpha$ -anomer:  $[\alpha]_{\text{D}}^{20} = +67.7^\circ$  ( $c = 1.39$ ,  $\text{CHCl}_3$ ); IR (thin film): 696, 933, 1101, 1153, 1159, 1207, 1327, 1454, 1714, 2866, 3032;  $^1\text{H}$  NMR ( $\text{CDCl}_3$ ,  $T = 323$  K, 500 MHz, HH-COSY, HSQC):  $\delta$  7.35 – 7.24 (m, 12H,  $\text{CH}_{\text{arom}}$ ), 7.11 – 7.06 (m, 1H, NPh), 6.83 (d, 2H,  $J = 7.5$  Hz, NPh), 6.37 (d, 1H,  $J = 8.3$  Hz, H-1), 5.17 (dd, 1H,  $J = 50.5$ , 1.6 Hz, H-2), 4.65 (d, 1H,  $J = 12.0$  Hz,  $\text{CHH}$  Bn), 4.61 – 4.55 (m, 2H,  $\text{CHH}$  Bn,  $\text{CHH}$  Bn), 4.53 (d, 1H,  $J = 12.1$  Hz,  $\text{CHH}$  Bn), 4.44 (q, 1H,  $J = 4.9$  Hz, H-4), 4.16 (dddd, 1H,  $J = 23.1$ , 5.8, 1.8, 0.9 Hz, H-3), 3.64 (d, 2H,  $J = 4.7$  Hz, H-5, H-5);  $^{13}\text{C}$ -APT NMR ( $\text{CDCl}_3$ ,  $T = 323$  K, 126 MHz, HSQC):  $\delta$  143.8 ( $\text{C}_q$  NPh), 138.1, 137.4 ( $\text{C}_q$  Bn), 128.9, 128.7, 128.6, 128.2, 127.9, 127.9, 124.6, 119.8 ( $\text{CH}_{\text{arom}}$ ), 116.2 (q,  $J = 286.8$  Hz,  $\text{CF}_3$ ), 102.7 (d,  $J = 38.8$  Hz, C-1), 98.9 (d,  $J = 184.9$  Hz, C-2), 84.3 (d,  $J = 3.4$  Hz, C-4), 82.9 (d,  $J = 25.7$  Hz, C-3), 73.8, 72.8 ( $\text{CH}_2$  Bn), 69.2 (C-5);  $^{19}\text{F}$  NMR ( $\text{CDCl}_3$ ,  $T = 323$  K, 471 MHz, HH-COSY, HSQC):  $\delta$  -66.34 (bs, 3F,  $\text{CF}_3$ ), -188.59 (ddd, 1F,  $J = 50.5$ , 23.1, 11.0 Hz, F-2); Data for the  $\beta$ -anomer:  $[\alpha]_{\text{D}}^{20} = -43.0^\circ$  ( $c = 0.6$ ,  $\text{CHCl}_3$ ); IR (thin film): 696, 1026, 1072, 1092, 1153, 1159, 1207, 1319, 1717, 2864;  $^1\text{H}$  NMR ( $\text{CDCl}_3$ ,  $T = 323$  K, 500 MHz, HH-COSY, HSQC):  $\delta$  7.35 – 7.24 (m, 12H,  $\text{CH}_{\text{arom}}$ ), 7.10 – 7.05 (m, 1H, NPh), 6.80 (dd, 2H,  $J = 8.4$ , 1.1 Hz, NPh), 6.46 (bs, 1H, H-1), 5.17 (ddd, 1H,  $J = 52.0$ , 5.8, 4.5 Hz, H-2), 4.69 (d, 1H,  $J = 11.7$  Hz,  $\text{CHH}$  Bn), 4.60 (d, 1H,  $J = 11.8$  Hz,  $\text{CHH}$  Bn), 4.57 (d, 1H,  $J = 12.1$  Hz,  $\text{CHH}$  Bn), 4.54 (d, 1H,  $J = 12.1$  Hz,  $\text{CHH}$  Bn), 4.32 (dt, 1H,  $J = 16.7$ , 5.9 Hz, H-3), 4.25 (q, 1H,  $J = 5.7$  Hz, H-4), 3.63 (dd, 1H,  $J = 10.4$ , 5.6 Hz, H-5), 3.60 (dd, 1H,  $J = 10.5$ , 5.5 Hz, H-5);  $^{13}\text{C}$ -APT NMR ( $\text{CDCl}_3$ ,  $T = 323$  K, 126 MHz, HSQC):  $\delta$  143.8 ( $\text{C}_q$  NPh), 138.1, 137.5 ( $\text{C}_q$  Bn), 128.9, 128.6, 128.6, 128.1, 127.9, 127.9, 127.9, 124.4, 119.7 ( $\text{CH}_{\text{arom}}$ ), 116.1 (q,  $J = 285.9$  Hz,  $\text{CF}_3$ ), 96.9 (d,  $J = 18.1$  Hz, C-1), 95.1 (d,  $J = 201.9$  Hz, C-2), 81.9 (d,  $J = 9.0$  Hz, C-4), 81.2 (d,  $J = 21.4$  Hz, C-3), 73.7, 72.7 ( $\text{CH}_2$  Bn), 70.9 (C-5);  $^{19}\text{F}$  NMR ( $\text{CDCl}_3$ ,  $T = 323$  K, 471 MHz, HH-COSY, HSQC):  $\delta$  -66.45 (bs, 3F,  $\text{CF}_3$ ), -203.20 (dd, 1F,  $J = 52.1$ , 16.7 Hz, F-2); HRMS:  $[\text{M}+\text{H}]^+$  calcd for  $\text{C}_{27}\text{H}_{26}\text{F}_4\text{NO}_4$  504.17925, found 504.17933.

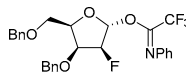

**3,5-di-O-benzyl-2-deoxy-2-fluoro-1-O-(N-phenyltrifluoroacetimidoyl)- $\alpha/\beta$ -D-lyxofuranoside (11).** The title compound was generated from **47** by the general procedure for imidate donor synthesis, conditions A. Yield: 82%  $\alpha$  only (0.54 mmol) as a colourless oil.  $[\alpha]_{\text{D}}^{20} = +50.2^\circ$  ( $c = 1.30$ ,  $\text{CHCl}_3$ ); IR (thin film): 694,

737, 931, 1086, 1097, 1150, 1207, 1321, 1715, 2872, 3032;  $^1\text{H}$  NMR ( $\text{CDCl}_3$ ,  $T = 323$  K, 500 MHz, HH-COSY, HSQC):  $\delta$  7.36 – 7.22 (m, 12H,  $\text{CH}_{\text{arom}}$ ), 7.11 – 7.04 (m, 1H, NPh), 6.82 (d, 2H,  $J = 7.5$  Hz, NPh), 6.41 (bs, 1H, H-1), 5.02 (dd, 1H,  $J = 51.7$ , 3.8 Hz, H-2), 4.69 (d, 1H,  $J = 11.6$  Hz,  $\text{CHH}$  Bn), 4.60 – 4.53 (m, 3H,  $\text{CHH}$  Bn,  $\text{CHH}$  Bn, H-4), 4.50 (d, 1H,  $J = 12.0$  Hz,  $\text{CHH}$  Bn), 4.34 (ddd, 1H,  $J = 17.6$ , 6.4, 4.3 Hz, H-3), 3.83 (dd, 1H,  $J = 10.7$ , 4.5 Hz, H-5), 3.68 (dd, 1H,  $J = 9.8$ , 7.3 Hz, H-5);  $^{13}\text{C}$ -APT NMR ( $\text{CDCl}_3$ , 126 MHz, HSQC):  $\delta$  143.6 ( $\text{C}_q$  NPh), 142.9 (q,  $J = 36.4$  Hz,  $\text{F}_3\text{CC}=\text{N}$ ), 138.3, 137.4 ( $\text{C}_q$  Bn), 128.9, 128.6, 128.5, 128.2, 127.9, 127.7, 124.6, 119.7 ( $\text{CH}_{\text{arom}}$ ), 116.2 (q,  $J = 285.9$  Hz,  $\text{CF}_3$ ), 101.3 (d,  $J = 33.4$  Hz, C-1), 92.6 (d,  $J = 192.3$  Hz, C-2), 80.2 (C-4), 76.6 (d,  $J = 15.0$  Hz, C-3), 73.7, 73.7 ( $\text{CH}_2$  Bn), 69.5 (C-5);  $^{19}\text{F}$  NMR ( $\text{CDCl}_3$ ,  $T = 323$  K, 471 MHz):  $\delta$  -66.49 (bs, 3F,  $\text{CF}_3$ ), -207.43 (ddd, 1F,  $J = 51.8$ , 17.6, 9.5 Hz, C-2-F); HRMS:  $[\text{2M}+\text{NH}_4]^+$  calcd for  $\text{C}_{54}\text{H}_{54}\text{F}_8\text{N}_3\text{O}_8$  1024.37777, found 1024.37849.

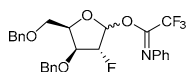

**3,5-di-O-benzyl-2-deoxy-2-fluoro-1-O-(N-phenyltrifluoroacetimidoyl)- $\alpha/\beta$ -D-xylofuranoside (12).** The title compound was generated from **48** by the general procedure for imidate donor synthesis, conditions A.

Yield: 91%  $\alpha:\beta = 37:63$  (0.36 mmol) as a colourless oil. IR (thin film): 694, 1086, 1153, 1207, 1323, 1715;  $^1\text{H}$  NMR ( $\text{CDCl}_3$ ,  $T = 323$  K, 500 MHz, HH-COSY, HSQC):  $\delta$  7.35 – 7.22 (m, 12H,  $\text{CH}_{\text{arom}}$ ), 7.11 – 7.04 (m, 1H, NPh), 6.84 – 6.78 (m, 2H, NPh), 6.46 (bs, 0.37H, H-1 $\alpha$ ), 6.34 (d, 0.63H,  $J = 12.5$  Hz, H-1 $\beta$ ), 5.23 (dt, 0.37H,  $J = 51.9$ , 4.0 Hz, H-2 $\alpha$ ), 5.18 (dd, 0.63H,  $J = 49.8$ , 1.6 Hz, H-2 $\beta$ ), 4.71 (d, 0.37H,  $J = 11.8$  Hz,  $\text{CHH}$  Bn $\alpha$ ), 4.68 – 4.50 (m, 3.63H,  $\text{CHH}$  Bn $\alpha$ ,  $\text{CH}_2$  Bn $\alpha$ , 2x $\text{CH}_2$  Bn $\beta$ , H-4 $\alpha$ , H-4 $\beta$ ), 4.41 (ddd, 0.37H,  $J = 15.7$ , 6.5, 4.8 Hz, H-3 $\alpha$ ), 4.26 (ddd, 0.63H,  $J = 16.2$ , 5.8, 1.6 Hz, H-3 $\beta$ ), 3.85 (dd, 0.63H,  $J = 10.5$ , 5.4 Hz, H-5 $\beta$ ), 3.75 (dd, 0.63H,  $J = 10.4$ , 6.6 Hz, H-5 $\beta$ ), 3.72 (dd, 0.37H,  $J = 10.7$ , 4.5 Hz, H-5 $\alpha$ ), 3.65 (dd, 0.37H,  $J = 10.6$ , 5.0 Hz, H-5 $\alpha$ );  $^{13}\text{C}$ -APT NMR ( $\text{CDCl}_3$ ,  $T = 323$  K, 126 MHz, HSQC):  $\delta$  143.9, 143.8 ( $\text{C}_q$  NPh), 138.4, 138.2, 137.4, 137.4 ( $\text{C}_q$  Bn), 128.9, 128.9, 128.7, 128.5, 128.5, 128.2, 128.1, 127.8, 127.8, 127.8, 127.6, 124.5, 124.4, 119.7 ( $\text{CH}_{\text{arom}}$ ), 116.1 (q,  $J = 286.3$  Hz,  $\text{CF}_3$ ), 102.1 (d,  $J = 37.5$  Hz, H-1 $\beta$ ), 97.0 (d,  $J = 16.8$  Hz, H-1 $\alpha$ ), 97.0 (d,  $J = 184.5$  Hz, H-2 $\beta$ ), 94.1 (d,  $J = 200.0$  Hz, H-2 $\alpha$ ), 83.1 (C-4 $\beta$ ), 80.5 (d,  $J = 25.6$  Hz, C-3 $\beta$ ), 79.9 (d,  $J = 22.9$  Hz, C-3 $\alpha$ ), 79.0 (d,  $J = 6.8$  Hz, C-4 $\alpha$ ), 73.8 ( $\text{CH}_2$  Bn $\alpha$ ), 73.7, 73.2 ( $\text{CH}_2$  Bn $\beta$ ), 72.9 ( $\text{CH}_2$  Bn $\alpha$ ), 68.9 (C-5 $\beta$ ), 68.2 (C-5 $\alpha$ );  $^{19}\text{F}$  NMR ( $\text{CDCl}_3$ ,  $T = 323$  K, 471 MHz):  $\delta$  -66.32 (s, 3F,  $\text{CF}_3$ ), -193.57 (dt, 0.63F,  $J = 49.8$ , 14.1 Hz, F-2 $\beta$ ), -202.33 (dd, 0.37F,  $J = 52.1$ , 15.6 Hz, F-2 $\alpha$ ); HRMS:  $[\text{2M}+\text{NH}_4]^+$  calcd for  $\text{C}_{54}\text{H}_{54}\text{F}_8\text{N}_3\text{O}_8$  1024.37777, found 1024.37842.

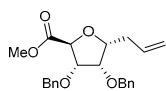

**Methyl (1-allyl-2,3-di-O-benzyl-1-deoxy- $\alpha$ -D-ribofuranosyl uronate) (65).** Donor **1** and allyltrimethylsilane (4 eq.) were condensed using the general procedure for furanosyl imidate glycosylations at  $-20^{\circ}\text{C}$  for 100 h with TfOH as the promotor. Yield = 30.5 mg, 79  $\mu\text{mol}$ , 79% as a white solid.  $R_f$ : 0.57 (4/1 pentane/EtOAc).

$[\alpha]_{\text{D}}^{20} = +28.3^{\circ}$  ( $c = 0.60$ ,  $\text{CHCl}_3$ ); IR (thin film): 698, 737, 916, 1026, 1099, 1144, 1206, 1275, 1356, 1454, 1748, 2868, 2922, 3030;  $^1\text{H}$  NMR ( $\text{CDCl}_3$ , 500 MHz, HH-COSY, HSQC):  $\delta$  7.38 – 7.27 (m, 10H,  $\text{CH}_{\text{arom}}$ ), 5.77 (ddt, 1H,  $J = 17.1, 10.2, 6.9$  Hz, CH allyl), 5.11 (dq, 1H,  $J = 17.2, 1.6$  Hz, CHH allyl), 5.04 (ddt, 1H,  $J = 10.2, 2.0, 1.1$  Hz, CHH allyl), 4.82 (d, 1H,  $J = 11.6$  Hz, CHH Bn), 4.67 (d, 1H,  $J = 12.0$  Hz, CHH Bn), 4.63 (d, 1H,  $J = 12.0$  Hz, CHH Bn), 4.59 (d, 1H,  $J = 6.0$  Hz, H-4), 4.56 (d, 1H,  $J = 11.6$  Hz, CHH Bn), 4.22 (dd, 1H,  $J = 6.0, 4.5$  Hz, H-3), 4.17 (td, 1H,  $J = 7.0, 4.1$  Hz, H-1), 3.99 (t, 1H,  $J = 4.3$  Hz, H-2), 3.73 (s, 3H,  $\text{CH}_3$   $\text{CO}_2\text{Me}$ ), 2.56 – 2.48 (m, 2H,  $\text{CH}_2$  allylic);  $^{13}\text{C}$ -APT NMR ( $\text{CDCl}_3$ , 126 MHz, HSQC):  $\delta$  172.7 (C=O), 138.2, 137.6 ( $\text{C}_q$ ), 134.6 (CH allyl), 128.6, 128.5, 128.1, 128.0, 127.9 ( $\text{CH}_{\text{arom}}$ ), 117.3 ( $\text{CH}_2$  allyl), 82.7 (C-3), 81.1 (C-1), 79.3 (C-4), 77.8 (C-2), 73.6, 72.8 ( $\text{CH}_2$  Bn), 52.4 ( $\text{CH}_3$   $\text{CO}_2\text{Me}$ ), 34.0 ( $\text{CH}_2$  allylic);  $^{13}\text{C}$  HSQC-HECADE NMR ( $\text{CDCl}_3$ , 126 MHz):  $^2J_{\text{C}_2, \text{H}_1} = +1.5$  Hz,  $^3J_{\text{Callyl}, \text{H}_2} = +0.7$  Hz; HRMS:  $[\text{M}+\text{NH}_4]^+$  calcd for  $\text{C}_{23}\text{H}_{30}\text{NO}_5$  400.21185, found 400.21173.

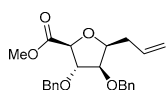

**Methyl (1-allyl-2,3-di-O-benzyl-1-deoxy- $\beta$ -D-arabinofuranosyl uronate) (66).** Donor **2** and allyltrimethylsilane (4 eq.) were condensed using the general procedure for furanosyl imidate glycosylations at  $-20^{\circ}\text{C}$  for 100 h with TfOH as the promotor. Yield = 29 mg, 76  $\mu\text{mol}$ , 76% as a white solid ( $\alpha$ : $\beta$  = 5:95).  $R_f$ : 0.64 (4/1 pentane/EtOAc).

$[\alpha]_{\text{D}}^{20} = +32.4^{\circ}$  ( $c = 0.38$ ,  $\text{CHCl}_3$ ); IR (thin film): 698, 737, 916, 1028, 1101, 1207, 1279, 1454, 1726, 1761, 2920;  $^1\text{H}$  NMR ( $\text{CDCl}_3$ , 500 MHz, HH-COSY, HSQC):  $\delta$  7.44 – 7.18 (m, 10H,  $\text{CH}_{\text{arom}}$ ), 5.79 (ddt, 1H,  $J = 17.1, 10.2, 7.0$  Hz, CH allyl), 5.14 (dq, 1H,  $J = 17.1, 1.5$  Hz, CHH allyl), 5.08 – 5.02 (m, 1H, CHH allyl), 4.66 (d, 1H,  $J = 11.9$  Hz, CHH Bn), 4.56 (d, 1H,  $J = 11.9$  Hz, CHH Bn), 4.51 (d, 1H,  $J = 1.7$  Hz, H-4), 4.49 (d, 1H,  $J = 11.8$  Hz, CHH Bn), 4.39 – 4.34 (m, 2H, CHH Bn, H-3), 4.21 (td, 1H,  $J = 7.2, 3.5$  Hz, H-1), 3.81 (dd, 1H,  $J = 3.5, 0.8$  Hz, H-2), 3.68 (s, 3H,  $\text{CH}_3$   $\text{CO}_2\text{Me}$ ), 2.64 – 2.50 (m, 2H,  $\text{CH}_2$  allylic);  $^{13}\text{C}$ -APT NMR ( $\text{CDCl}_3$ , 126 MHz, HSQC):  $\delta$  171.4 (C=O) 137.7, 137.5 ( $\text{C}_q$ ), 134.7 (CH allyl), 128.6, 128.5, 128.1, 127.9, 127.9, 127.8 ( $\text{CH}_{\text{arom}}$ ), 117.3 ( $\text{CH}_2$  allyl), 85.2 (C-3), 82.4 (C-1), 81.6 (C-4), 81.3 (C-2), 71.9, 71.8 ( $\text{CH}_2$  Bn), 52.3 ( $\text{CO}_2\text{Me}$ ), 33.3 ( $\text{CH}_2$  allylic);  $^{13}\text{C}$  HSQC-HECADE NMR ( $\text{CDCl}_3$ , 126 MHz):  $^2J_{\text{C}_1, \text{H}_2} = +2.5$  Hz,  $^2J_{\text{C}_2, \text{H}_1} = +2.5$  Hz,  $^3J_{\text{Callyl}, \text{H}_2} = +0.3$  Hz; HRMS:  $[\text{M}+\text{Na}]^+$  calcd for  $\text{C}_{23}\text{H}_{26}\text{O}_5\text{Na}$  405.16725, found 405.16656.

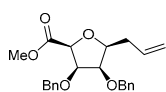

**Methyl (1-allyl-2,3-di-O-benzyl-1-deoxy- $\beta$ -D-lyxofuranosyl uronate) (67).** Donor **3** and allyltrimethylsilane (4 eq.) were condensed using the general procedure for furanosyl imidate glycosylations at  $-20^{\circ}\text{C}$  for 100 h with TfOH as the promotor. Yield = 29 mg, 76  $\mu\text{mol}$ , 76% as a white solid.  $R_f$ : 0.32 (4/1 pentane/EtOAc).

$[\alpha]_{\text{D}}^{20} = +3.6^{\circ}$  ( $c = 0.58$ ,  $\text{CHCl}_3$ ); IR (thin film): 698, 737, 1028, 1072, 1084, 1099, 1152, 1207, 1356, 1437, 1454, 1732, 1763, 2870, 2920, 2949.  $^1\text{H}$  NMR ( $\text{CDCl}_3$ , 500 MHz, HH-COSY, HSQC):  $\delta$  7.39 – 7.21 (m, 10H,  $\text{CH}_{\text{arom}}$ ), 5.92 (ddt, 1H,  $J = 17.2, 10.2, 7.0$  Hz, CH allyl), 5.15 (dq, 1H,  $J = 17.2, 1.4$  Hz, CHH allyl), 5.09 – 5.04 (m, 1H, CHH allyl), 4.76 – 4.67 (m, 3H,  $\text{CH}_2$  Bn, CHH Bn), 4.62 (d, 1H,  $J = 6.0$  Hz, H-4), 4.56 (d, 1H,  $J = 11.8$  Hz, CHH Bn), 4.34 (dd, 1H,  $J = 6.0, 4.4$  Hz, H-3), 4.13 (dt, 1H,  $J = 8.8, 5.4$  Hz, H-1), 4.04 (dd, 1H,  $J = 6.0, 4.4$  Hz, H-2), 3.66 (s, 3H,  $\text{CH}_3$   $\text{CO}_2\text{Me}$ ), 2.75 – 2.64 (m, 1H, CHH allylic), 2.58 – 2.48 (m, 1H, CHH allylic);  $^{13}\text{C}$ -APT NMR ( $\text{CDCl}_3$ , 126 MHz, HSQC):  $\delta$  170.3 (C=O), 138.2, 138.2 ( $\text{C}_q$ ), 135.8 (CH allyl), 128.5, 128.4, 127.8, 127.7, 127.6 ( $\text{CH}_{\text{arom}}$ ), 116.8 ( $\text{CH}_2$  allyl), 80.5 (C-1), 80.1 (C-3), 79.2 (C-2), 78.3 (C-4), 73.9, 73.2 ( $\text{CH}_2$  Bn), 51.9 ( $\text{CO}_2\text{Me}$ ), 35.0 ( $\text{CH}_2$  allylic);  $^{13}\text{C}$  HSQC-HECADE NMR ( $\text{CDCl}_3$ , 126 MHz):  $^2J_{\text{C}_2, \text{H}_1} = -0.25$  Hz,  $^3J_{\text{Callyl}, \text{H}_2} = +2.9$  Hz; HRMS:  $[\text{M}+\text{NH}_4]^+$  calcd for  $\text{C}_{23}\text{H}_{30}\text{NO}_5$  400.21185, found 400.21167.

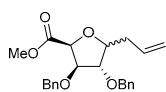

**Methyl (1-allyl-2,3-di-O-benzyl-1-deoxy- $\alpha/\beta$ -D-xylofuranosyl uronate) (68).** Donor **4** and allyltrimethylsilane (4 eq.) were condensed using the general procedure for furanosyl imidate glycosylations at  $-20^{\circ}\text{C}$  for 100 h with TfOH as the promotor. Four fractions were isolated: amide **80** (1 mg,  $R_f$ : 0.66), mixed fraction (22 mg, product **68**,  $\alpha$ : $\beta$  = 35:65 as 68 wt%, and amide **80** as 32 wt%), title product **68** (7 mg,  $\alpha$ : $\beta$  = 69:33), cyclized product **81** (2 mg,  $R_f$ : 0.38 ) Calculated total title product yield = 22 mg, 57  $\mu\text{mol}$ , 57%, ( $\alpha$ : $\beta$  = 45:55).  $R_f$ : 0.61 and 0.57 (4/1 pentane/EtOAc). Reported as a 1:1 mixture. IR (thin film): 698, 737, 1028, 1078, 1094, 1206, 1290, 1454, 1732, 1765, 2862, 2949.  $^1\text{H}$  NMR ( $\text{CDCl}_3$ , 500 MHz, HH-COSY, HSQC):  $\delta$  7.38 – 7.24 (m, 20H,  $\text{CH}_{\text{arom}}$ ), 5.88 – 5.72 (m, 2H, CH allyl), 5.16 – 5.03 (m, 4H,  $\text{CH}_2$  allyl), 4.82 (d, 1H,  $J = 5.1$  Hz, H-4 $\alpha$ ), 4.69 (d, 1H,  $J = 4.8$  Hz, H-4 $\beta$ ), 4.54 – 4.38 (m, 8H, 4x $\text{CH}_2$  Bn), 4.36 (ddd, 1H,  $J = 7.9, 6.5, 3.3$  Hz, H-1 $\alpha$ ), 4.27 (dd, 1H,  $J = 5.1, 1.0$  Hz, H-3 $\alpha$ ), 4.24 (dd, 1H,  $J = 4.8, 1.7$  Hz, H-3 $\beta$ ), 4.01 (td, 1H,  $J = 6.9, 3.3$  Hz, H-1 $\beta$ ), 3.82 (d, 1H,  $J = 3.5$  Hz, H-2 $\alpha$ ), 3.82 (d, 1H,  $J = 3.4$  Hz, H-2 $\beta$ ), 3.76 (s, 3H,  $\text{CH}_3$   $\text{CO}_2\text{Me}$ ), 3.73 (s, 3H,  $\text{CH}_3$   $\text{CO}_2\text{Me}$ ), 2.64 – 2.41 (m, 4H,  $\text{CH}_2$  allylic);  $^{13}\text{C}$ -APT NMR ( $\text{CDCl}_3$ , 126 MHz, HSQC):  $\delta$  170.6 (C=O $\alpha$ ), 169.6 (C=O $\beta$ ), 137.7 ( $\text{C}_{q\alpha}$ ), 137.7 ( $\text{C}_{q\beta}$ ), 137.6 ( $\text{C}_{q\beta}$ ), 137.5 ( $\text{C}_{q\alpha}$ ), 134.5 (CH allyl $\alpha$ ), 134.4 (CH allyl $\beta$ ), 128.6, 128.6, 128.6, 128.6, 128.1, 128.1, 128.1, 127.9, 127.9, 127.9 ( $\text{CH}_{\text{arom}}$ ), 117.6 ( $\text{CH}_2$  allylic $\beta$ ), 117.3 ( $\text{CH}_2$  allylic $\alpha$ ), 84.7 (C-2 $\beta$ ), 84.0 (C-1 $\beta$ ), 83.9 (C-3 $\beta$ ), 82.9 (C-3 $\alpha$ ), 81.6 (C-1 $\alpha$ ), 81.4 (C-2 $\alpha$ ), 80.4 (C-4 $\beta$ ), 80.0 (C-4 $\alpha$ ), 73.0, 72.5, 72.3, 72.0 ( $\text{CH}_2$  Bn), 52.1 ( $\text{CO}_2\text{Me}$ ), 52.0 ( $\text{CO}_2\text{Me}$ ), 38.1 ( $\text{CH}_2$  allylic $\beta$ ), 33.1 ( $\text{CH}_2$  allylic $\alpha$ );  $^{13}\text{C}$  HSQC-HECADE NMR ( $\text{CDCl}_3$ , 126 MHz):  $\alpha$ -anomer:  $^2J_{\text{C}_1, \text{H}_2} = +1.5$  Hz,  $^2J_{\text{C}_2, \text{H}_1} = +2.4$  Hz,  $^3J_{\text{Callyl}, \text{H}_2} = +0.2$  Hz,  $\beta$ -anomer:  $^2J_{\text{C}_1, \text{H}_2} = -1.5$  Hz,  $^2J_{\text{C}_2, \text{H}_1} = -4.5$  Hz,  $^3J_{\text{Callyl}, \text{H}_2} = +2.9$  Hz; HRMS:  $[\text{M}+\text{NH}_4]^+$  calcd for  $\text{C}_{23}\text{H}_{30}\text{NO}_5$  400.21185, found 400.21153.

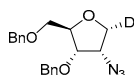

**1-[<sup>2</sup>H]-1,4-anhydro-2-azido-3,5-di-O-benzyl-2-deoxy- $\alpha$ -D-ribose (69).** Donor **5** and triethylsilane-*d* (4 eq.) were condensed using the general procedure for furanosyl imidate glycosylations at 0-5°C for 100 h with TfOH as the promotor. Yield = 23 mg, 68  $\mu$ mol, 68% as a colourless oil. Inseparable mixture of **74** and amide **98** (in a 95:5 ratio). *R<sub>f</sub>*: 0.26 (9/1 pentane/EtOAc). [ $\alpha$ ]<sub>D</sub><sup>20</sup> = +88° (*c* = 0.77, CHCl<sub>3</sub>) IR (thin film): 698, 738, 1028, 1089, 1269, 1454, 2104, 2864; <sup>1</sup>H NMR (CDCl<sub>3</sub>, 500 MHz, HH-COSY, HH-NOESY, HSQC):  $\delta$  7.38 – 7.26 (m, 10H, CH<sub>arom</sub>), 4.69 (d, 1H, *J* = 11.8 Hz, *CHH* Bn), 4.57 – 4.52 (m, 2H, *CHH* Bn, *CHH* Bn), 4.48 (d, 1H, *J* = 12.0 Hz, *CHH* Bn), 4.14 (dd, 1H, *J* = 6.1, 5.5 Hz, H-3), 4.09 – 4.02 (m, 2H, H-1, H-4), 3.89 (t, 1H, *J* = 5.4 Hz, H-2), 3.61 (dd, 1H, *J* = 10.7, 3.3 Hz, H-5), 3.50 (dd, 1H, *J* = 10.7, 4.0 Hz, H-5); <sup>13</sup>C-APT NMR (CDCl<sub>3</sub>, 126 MHz, HSQC):  $\delta$  138.1, 137.4 (C<sub>q</sub>), 128.6, 128.5, 128.2, 128.1, 127.8, 127.8 (CH<sub>arom</sub>), 80.9 (C-4), 79.9 (C-3), 73.6, 73.0 (CH<sub>2</sub> Bn), 70.2 (t, *J* = 22.8 Hz, C-1), 69.8 (C-5), 60.8 (C-2); <sup>2</sup>H NMR (CHCl<sub>3</sub>, 77 MHz):  $\delta$  3.90; <sup>13</sup>C HSQC-HECADE NMR (CDCl<sub>3</sub>, 126 MHz): <sup>2</sup>*J*<sub>C1-H2</sub>: +1.5 Hz, <sup>2</sup>*J*<sub>C2-H1</sub>: +1.3 Hz; HRMS: [M+Na]<sup>+</sup> calcd for C<sub>19</sub>H<sub>20</sub>DN<sub>3</sub>O<sub>3</sub>Na 363.1543, found 363.1546.

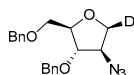

**1-[<sup>2</sup>H]-1,4-anhydro-2-azido-3,5-di-O-benzyl-2-deoxy- $\beta$ -D-arabitol (70).** Donor **6** and triethylsilane-*d* (4 eq.) were condensed using the general procedure for furanosyl imidate glycosylations at 0-5°C for 100 h with TfOH as the promotor. Yield = 19.5 mg, 57  $\mu$ mol, 57% as a colourless oil. *R<sub>f</sub>*: 0.38 (9/1 pentane/EtOAc). Spectroscopic data were in accord with those previously reported for the non-deuterated compound.<sup>19</sup> [ $\alpha$ ]<sub>D</sub><sup>20</sup> = -14.6° (*c* = 0.98, CHCl<sub>3</sub>); IR <sup>1</sup>H NMR (CDCl<sub>3</sub>, 500 MHz, HH-COSY, HSQC):  $\delta$  7.37 – 7.26 (m, 10H, CH<sub>arom</sub>), 4.59 (d, 1H, *J* = 11.8 Hz, *CHH* Bn), 4.56 (s, 2H, CH<sub>2</sub> Bn), 4.54 (d, 1H, *J* = 11.8 Hz, *CHH* Bn), 4.02 (td, 1H, *J* = 5.3, 4.3 Hz, H-4), 4.00 (bs, 1H, H-1), 3.98 (dd, 1H, *J* = 5.0, 1.9 Hz, H-2), 3.92 (dd, 1H, *J* = 4.3, 1.9 Hz, H-3), 3.59 (dd, 1H, *J* = 10.3, 5.5 Hz, H-5), 3.57 (dd, 1H, *J* = 10.3, 5.2 Hz, H-5); <sup>13</sup>C-APT NMR (CDCl<sub>3</sub>, 126 MHz, HSQC):  $\delta$  138.1, 137.4 (C<sub>q</sub>), 128.7, 128.5, 128.2, 128.0, 127.9, 127.8 (CH<sub>arom</sub>), 85.0 (C-3), 83.4 (C-4), 73.6, 72.4 (CH<sub>2</sub> Bn), 70.7 (t, *J* = 23.0 Hz, C-1), 70.5, 70.0 (C-5), 65.9 (C-2); <sup>2</sup>H NMR (CHCl<sub>3</sub>, 77 MHz):  $\delta$  4.02; <sup>13</sup>C HSQC-HECADE NMR (CDCl<sub>3</sub>, 126 MHz): <sup>2</sup>*J*<sub>C1-H2</sub>: +1.1 Hz, <sup>2</sup>*J*<sub>C2-H1</sub>: +2.3 Hz; HRMS: [M+NH<sub>4</sub>]<sup>+</sup> calcd for C<sub>19</sub>H<sub>24</sub>DN<sub>4</sub>O<sub>3</sub> 358.19839, found 358.19858.

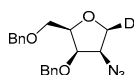

**1-[<sup>2</sup>H]-1,4-anhydro-2-azido-3,5-di-O-benzyl-2-deoxy- $\beta$ -D-lyxitol (71).** Donor **7** and triethylsilane-*d* (4 eq.) were condensed using the general procedure for furanosyl imidate glycosylations at 0-5°C for 100 h with TfOH as the promotor. Yield = 20 mg, 59  $\mu$ mol, 59% as a colourless oil. *R<sub>f</sub>*: 0.13 (9/1 pentane/EtOAc). [ $\alpha$ ]<sub>D</sub><sup>20</sup> = -37° (*c* = 1.0, CHCl<sub>3</sub>); IR (thin film): 698, 738, 1984, 1269, 1452, 2104, 2868, 2922, 3032; <sup>1</sup>H NMR (CDCl<sub>3</sub>, 500 MHz, HH-COSY, HSQC):  $\delta$  7.36 – 7.26 (m, 10H, CH<sub>arom</sub>), 4.77 (d, 1H, *J* = 11.6 Hz, *CHH* Bn), 4.61 – 4.56 (m, 2H, *CHH* Bn, *CHH* Bn), 4.50 (d, 1H, *J* = 11.9 Hz, *CHH* Bn), 4.20 (t, 1H, *J* = 5.2 Hz, H-3), 4.15 (dt, 1H, *J* = 6.9, 5.2 Hz, H-4), 3.92 (d, 1H, *J* = 6.4 Hz, H-1), 3.86 (dd, 1H, *J* = 6.3, 5.1 Hz, H-2), 3.73 (dd, 1H, *J* = 10.1, 5.0 Hz, H-5), 3.68 (dd, 1H, *J* = 10.1, 7.0 Hz, H-5); <sup>13</sup>C-APT NMR (CDCl<sub>3</sub>, 126 MHz, HSQC):  $\delta$  138.2, 137.5 (C<sub>q</sub>), 128.6, 128.5, 128.1, 128.0, 127.9, 127.8 (CH<sub>arom</sub>), 79.6, 79.6 (C-3, C-4), 74.0, 73.7 (CH<sub>2</sub> Bn), 69.0 (C-5), 68.7 (t, *J* = 22.8 Hz, C-1), 61.3 (C-2); <sup>2</sup>H NMR (CHCl<sub>3</sub>, 77 MHz):  $\delta$  3.95; <sup>13</sup>C HSQC-HECADE NMR: <sup>2</sup>*J*<sub>C2,H1</sub> = +0.2 Hz; HRMS: [M+Na]<sup>+</sup> calcd for C<sub>19</sub>H<sub>20</sub>DN<sub>3</sub>O<sub>3</sub>Na 363.1543, found 363.1551.

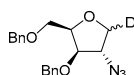

**1-[<sup>2</sup>H]-1,4-anhydro-2-azido-3,5-di-O-benzyl-2-deoxy- $\alpha/\beta$ -D-xylitol (72).** Donor **8** and triethylsilane-*d* (4 eq.) were condensed using the general procedure for furanosyl imidate glycosylations at 0-5°C for 100 h with TfOH as the promotor. Yield = 23 mg, 68  $\mu$ mol, 68% as a colourless oil ( $\alpha$ : $\beta$  = 85:15). Inseparable mixture of **72** and amide **79** (in a 73:27 ratio) *R<sub>f</sub>*: 0.30 (85/15 pentane/Et<sub>2</sub>O). IR (thin film): 696, 735, 1061, 1088, 1207, 1454, 1494, 1690, 2106, 2916; <sup>1</sup>H NMR (CDCl<sub>3</sub>, 500 MHz, HH-COSY, HSQC):  $\delta$  7.38 – 7.24 (m, 10H, CH<sub>arom</sub>), 4.65 – 4.58 (m, 2H, 2x*CHH* Bn), 4.54 (d, 1H, *J* = 11.9 Hz, *CHH* Bn), 4.52 (d, 1H, *J* = 11.9 Hz, *CHH* Bn), 4.21 – 4.15 (m, 1.85H, H-1 $\alpha$ , H-4), 4.04 (dd, 1H, *J* = 5.5, 1.9 Hz, H-2), 3.99 (dd, 1H, *J* = 4.4, 1.9 Hz, H-3), 3.74 – 3.70 (m, 1.15H, H-1 $\beta$ , H-5), 3.68 (dd, 1H, *J* = 10.0, 6.4 Hz, H-5); <sup>13</sup>C-APT NMR (CDCl<sub>3</sub>, 126 MHz, HSQC):  $\delta$  138.2, 137.4 (C<sub>q</sub>), 128.7, 128.5, 128.2, 127.9, 127.8, 127.8 (CH<sub>arom</sub>), 82.9 (C-3), 79.7 (C-4), 73.7, 72.6 (CH<sub>2</sub> Bn), 70.0 (t, *J* = 22.7 Hz C-1 $\beta$ ), 70.0 (t, *J* = 22.7, C-1 $\alpha$ ) 68.4 (C-5), 65.0 (C-2); <sup>2</sup>H NMR (CHCl<sub>3</sub>, 77 MHz):  $\delta$  4.19 (s, 0.15H), 3.75 (s, 0.85H); <sup>13</sup>C HSQC-HECADE NMR (CDCl<sub>3</sub>, 126 MHz):  $\alpha$ -anomer: <sup>2</sup>*J*<sub>C2,H1</sub> = +0.7 Hz;  $\beta$ -anomer: <sup>2</sup>*J*<sub>C2,H1</sub> = -4.3 Hz; HRMS: [M+Na]<sup>+</sup> calcd for C<sub>19</sub>H<sub>20</sub>DN<sub>3</sub>O<sub>3</sub>Na 363.1543, found 363.1549.

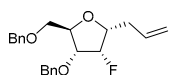

**Allyl 3,5-di-O-benzyl-1,2-dideoxy-2-fluoro- $\alpha$ -D-ribofuranoside (73).** Donor **9** and allyltrimethylsilane (4 eq.) were condensed using the general procedure for furanosyl imidate glycosylations at -20°C for 100 h with TfOH as the promotor. Yield = 27 mg, 76  $\mu$ mol, 76% as a white solid. *R<sub>f</sub>*: 0.52 (8/2 pentane/Et<sub>2</sub>O). Spectroscopic data were in accord with those previously reported.<sup>8</sup> <sup>1</sup>H NMR (CDCl<sub>3</sub>, 500 MHz, HH-COSY, HSQC):  $\delta$  7.40 – 7.19 (m, 10H, CH<sub>arom</sub>), 5.80 (ddtd, 1H, *J* = 17.3, 10.2, 7.0, 0.8 Hz, CH allyl), 5.20 – 5.14 (m, 1H, *CHH* allyl), 5.09 (ddt, 1H, *J* = 10.2, 2.1, 1.1 Hz, *CHH* allyl), 4.89 (dt, 1H, *J* = 55.2, 2.9 Hz, H-2), 4.69 (d, 1H, *J* = 11.7 Hz, *CHH* Bn), 4.59 (d, 1H, *J* = 12.1 Hz, *CHH* Bn), 4.52 (d, 1H, *J* = 11.7 Hz, *CHH* Bn), 4.49 (d, 1H, *J* = 12.1 Hz, *CHH* Bn), 4.21 – 4.16 (m, 1H, H-4), 4.11 (ddd, 1H, *J* = 8.6, 3.5, 0.5 Hz, H-3), 4.05 (dtd, 1H, *J* = 29.3, 7.4, 2.4 Hz, H-1), 3.71 (dd, 1H, *J* = 10.8, 2.4 Hz, H-5), 3.56 (dd, 1H, *J* = 10.9, 3.4 Hz, H-5), 2.49 (ddt, 2H, *J* = 7.0, 5.6, 1.4 Hz, CH<sub>2</sub> allylic); <sup>13</sup>C-APT NMR (CDCl<sub>3</sub>, 126 MHz, HSQC):  $\delta$  138.3, 137.6 (C<sub>q</sub>), 133.6 (CH allyl), 128.6, 128.5, 128.1, 128.0, 127.8, 127.7 (CH<sub>arom</sub>), 118.0 (CH allyl), 90.1 (d, *J* = 191.0 Hz, C-2), 80.0 (d, *J* = 18.3 Hz, C-1), 79.2 (C-4), 78.6 (d, *J* = 16.5 Hz, C-3), 73.6, 72.5 (CH<sub>2</sub> Bn), 69.6 (C-5), 33.7 (d, *J* = 9.3 Hz, CH allylic); <sup>19</sup>F NMR (CDCl<sub>3</sub>, 471 MHz):  $\delta$  -215.30 (ddd, *J* = 53.7, 29.4,



23.5 Hz, F-2);  $^{13}\text{C}$  HSQC-HECADE NMR ( $\text{CDCl}_3$ , 126 MHz):  $^2J_{\text{C}_2,\text{H}_1} = +4.9$  Hz,  $^3J_{\text{Callyl},\text{H}_2} = +0.2$  Hz; HRMS:  $[\text{M}+\text{NH}_4]^+$  calcd for  $\text{C}_{22}\text{H}_{29}\text{FNO}_3$  374.21260, found 374.21252.

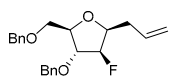

**Allyl 3,5-di-O-benzyl-1,2-dideoxy-2-fluoro- $\beta$ -D-arabinofuranoside (74).** Donor **10** and allyltrimethylsilane (4 eq.) were condensed using the general procedure for furanosyl imidate glycosylations at  $-20^\circ\text{C}$  for 100 h with TfOH as the promotor. Yield = 28 mg, 79  $\mu\text{mol}$ , 79% as a colourless oil.  $R_f$ : 0.80 (9/1 pentane/EtOAc).

$[\alpha]_D^{20} = -29.7^\circ$  ( $c = 0.93$ ,  $\text{CHCl}_3$ ); IR (thin film): 700, 712, 1026, 1070, 1096, 1269, 1452, 2924;  $^1\text{H}$  NMR ( $\text{CDCl}_3$ , 500 MHz, HH-COSY, HH-NOESY, HSQC):  $\delta$  7.36 – 7.25 (m, 10H,  $\text{CH}_{\text{arom}}$ ), 5.84 (ddtd, 1H,  $J = 17.2, 10.2, 7.1, 0.7$  Hz, CH allyl), 5.17 (dq, 1H,  $J = 17.1, 1.5$  Hz, CHH allyl), 5.10 (ddt, 1H,  $J = 10.2, 2.0, 1.1$  Hz, CHH allyl), 4.88 (dd, 1H,  $J = 52.0, 2.8$  Hz, H-2), 4.66 – 4.53 (m, 4H, 2xCH<sub>2</sub> Bn), 4.04 – 3.98 (m, 2.5H, H-1, H-3, H-4), 3.95 (td, 0.5H,  $J = 7.2, 2.8$  Hz, H-3), 3.65 – 3.59 (m, 1H, H-5), 3.56 – 3.51 (m, 1H, H-5), 2.55 – 2.42 (m, 2H, CH<sub>2</sub> allylic);  $^{13}\text{C}$ -APT NMR ( $\text{CDCl}_3$ , 126 MHz, HSQC):  $\delta$  138.2, 137.4 ( $\text{C}_q$ ), 133.8 (CH allyl), 128.6, 128.5, 128.1, 127.9, 127.9, 127.8 ( $\text{CH}_{\text{arom}}$ ), 117.8 (CH<sub>2</sub> allyl), 95.89 (d,  $J = 186.6$  Hz, C-2), 84.71 (d,  $J = 27.3$  Hz, C-3), 82.5 (C-4), 80.70 (d,  $J = 20.9$  Hz, C-1), 73.6, 72.2 (CH<sub>2</sub> Bn), 70.2 (C-5), 32.63 (d,  $J = 8.1$  Hz, CH<sub>2</sub> allylic);  $^{19}\text{F}$  NMR ( $\text{CDCl}_3$ , 471 MHz):  $\delta$  -198.80 (ddd,  $J = 50.6, 29.6, 20.2$  Hz);  $^{13}\text{C}$  HSQC-HECADE NMR ( $\text{CDCl}_3$ , 126 MHz):  $^2J_{\text{C}_1,\text{H}_2} = +4.2$  Hz,  $^2J_{\text{C}_2,\text{H}_1} = +5.6$  Hz,  $^3J_{\text{Callyl},\text{H}_2} = 0.1$  Hz; HRMS:  $[\text{M}+\text{NH}_4]^+$  calcd for  $\text{C}_{22}\text{H}_{29}\text{FNO}_3$  374.21260, found 374.21280.

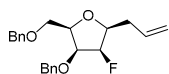

**Allyl 3,5-di-O-benzyl-1,2-dideoxy-2-fluoro- $\beta$ -D-lyxofuranoside (75).** Donor **11** and allyltrimethylsilane (4 eq.) were condensed using the general procedure for furanosyl imidate glycosylations at  $-20^\circ\text{C}$  for 100 h with TfOH as the promotor. Yield = 32 mg, 90  $\mu\text{mol}$ , 90% as a white solid.  $R_f$ : 0.28 (9/1 pentane/EtOAc).  $[\alpha]_D^{20} =$

$-10.5^\circ$  ( $c = 1.07$ ,  $\text{CHCl}_3$ ); IR (thin film): 696, 711, 737, 1026, 1070, 1271, 1452, 2870, 2922;  $^1\text{H}$  NMR ( $\text{CDCl}_3$ , 500 MHz, HH-COSY, HSQC):  $\delta$  7.42 – 7.21 (m, 10H,  $\text{CH}_{\text{arom}}$ ), 5.82 (ddt, 1H,  $J = 17.2, 10.2, 7.0$  Hz, CH allyl), 5.17 (dd, 1H,  $J = 17.1, 1.5$  Hz, CHH allyl), 5.12 – 5.06 (m, 1H, CHH allyl), 4.89 (ddd, 1H,  $J = 54.6, 4.0, 2.9$  Hz, H-2), 4.69 (d, 1H,  $J = 11.9$  Hz, CHH Bn), 4.62 (d, 1H,  $J = 12.2$  Hz, CHH Bn), 4.58 – 4.51 (m, 2H, 2xCHH Bn), 4.28 (td, 1H,  $J = 7.7, 3.6$  Hz, H-4), 4.19 (ddd, 1H,  $J = 22.8, 7.8, 4.0$  Hz, H-3), 3.84 (dtd, 1H,  $J = 27.3, 7.2, 2.8$  Hz, H-1), 3.80 (dd, 1H,  $J = 10.6, 3.7$  Hz, H-5), 3.65 (ddd, 1H,  $J = 10.6, 7.7, 1.7$  Hz, H-5), 2.51 (t, 2H,  $J = 7.1$  Hz, CH<sub>2</sub> allylic);  $^{13}\text{C}$ -APT NMR ( $\text{CDCl}_3$ , 126 MHz, HSQC):  $\delta$  138.6, 137.5 ( $\text{C}_q$ ), 133.7 (CH allyl), 128.6, 128.4, 128.1, 127.9, 127.8, 127.6 ( $\text{CH}_{\text{arom}}$ ), 117.9 (CH<sub>2</sub> allyl), 90.2 (d,  $J = 193.1$  Hz, C-2), 79.3 (d,  $J = 18.8$  Hz, C-1), 78.6 (d,  $J = 15.7$  Hz, C-3), 78.2 (C-4), 73.5, 72.8 (CH<sub>2</sub> Bn), 70.6 (d,  $J = 2.7$  Hz, C-5), 33.9 (d,  $J = 8.1$  Hz, CH<sub>2</sub> allylic);  $^{19}\text{F}$  NMR ( $\text{CDCl}_3$ , 471 MHz):  $\delta$  -213.57 (ddd,  $J = 54.5, 27.2, 22.9$  Hz);  $^{13}\text{C}$  HSQC-HECADE NMR ( $\text{CDCl}_3$ , 126 MHz):  $^2J_{\text{C}_1,\text{H}_2} = +1.2$  Hz,  $^2J_{\text{C}_2,\text{H}_1} = +5.2$  Hz,  $^3J_{\text{Callyl},\text{H}_2} = +0.4$  Hz; HRMS:  $[\text{M}+\text{NH}_4]^+$  calcd for  $\text{C}_{22}\text{H}_{29}\text{FNO}_3$  374.21260, found 374.21295.

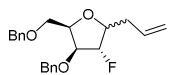

**Allyl 3,5-di-O-benzyl-1,2-dideoxy-2-fluoro- $\alpha/\beta$ -D-xylofuranoside (76).** Donor **12** and allyltrimethylsilane (4 eq.) were condensed using the general procedure for furanosyl imidate glycosylations at  $-20^\circ\text{C}$  for 100 h with TfOH as the promotor. Yield = 22 mg, 62  $\mu\text{mol}$ , 62% as a colourless oil ( $\alpha:\beta = 70:30$ ), and 12 mg (24%)

of the anomeric amide (**78**).  $R_f$ : 0.53 and 0.40 (9/1 pentane/Et<sub>2</sub>O). IR (thin film): 696, 735, 1028, 1076, 1088, 1454, 2868, 2922;  $^1\text{H}$  NMR ( $\text{CDCl}_3$ , 500 MHz, HH-COSY, HSQC):  $\delta$  7.37 – 7.25 (m, 10H,  $\text{CH}_{\text{arom}}$ ), 5.88 – 5.77 (m, 1H, CH allyl), 5.19 – 5.07 (m, 2H, CH<sub>2</sub> allyl), 4.91 (ddd, 0.7H,  $J = 51.4, 2.8, 1.3$  Hz, H-2 $\alpha$ ), 4.79 (ddd, 0.3H,  $J = 52.6, 2.9, 1.4$  Hz, H-2 $\beta$ ), 4.65 (d, 0.3H,  $J = 11.9$  Hz, CHH Bn $\beta$ ), 4.65 – 4.58 (m, 1.7H, 2xCHH Bn $\alpha$ , CHH Bn $\beta$ ), 4.56 (d, 0.7H,  $J = 11.9$  Hz, CHH Bn $\alpha$ ), 4.53 – 4.49 (m, 1.3H, 2xCHH Bn $\beta$ , CHH Bn $\alpha$ ), 4.42 – 4.36 (m, 0.7H, H-4 $\alpha$ ), 4.26 – 4.12 (m, 1.7H, H-1 $\alpha$ , H-3 $\alpha$ , H-4 $\beta$ ), 4.08 (ddd, 0.3H,  $J = 8.9, 4.3, 1.3$  Hz, H-3 $\beta$ ), 4.02 (dddd, 0.3H,  $J = 13.9, 7.3, 6.5, 2.8$  Hz, H-1 $\beta$ ), 3.76 (dd, 0.3H,  $J = 10.0, 5.3$  Hz, H-5 $\beta$ ), 3.73 – 3.69 (m, 1H, H-5 $\alpha$ , H-5 $\beta$ ), 3.67 (dd, 0.7H,  $J = 9.8, 6.4$  Hz, H-5 $\alpha$ ), 2.54 – 2.36 (m, 2H, CH<sub>2</sub> allylic);  $^{13}\text{C}$ -APT NMR ( $\text{CDCl}_3$ , 126 MHz, HSQC):  $\delta$  138.3, 138.2, 137.6 ( $\text{C}_q$ ), 134.0 (CH allyl $\alpha$ ), 133.8 (CH allyl $\beta$ ), 128.6, 128.6, 128.5, 128.1, 128.0, 127.9, 127.9, 127.8, 127.7, 127.7, 127.7 ( $\text{CH}_{\text{arom}}$ ), 117.8 (CH<sub>2</sub> allyl $\beta$ ), 117.7 (CH<sub>2</sub> allyl $\alpha$ ), 97.7 (d,  $J = 182.9$  Hz, C-2 $\beta$ ), 94.4 (d,  $J = 187.9$  Hz, C-2 $\alpha$ ), 82.4 (d,  $J = 35.5$  Hz, C-3 $\beta$ ), 82.4 (d,  $J = 13.9$  Hz, C-1 $\beta$ ), 81.8 (d,  $J = 25.8$  Hz, C-3 $\alpha$ ), 79.8 (d,  $J = 1.6$  Hz, C-4 $\beta$ ), 79.6 (d,  $J = 19.0$  Hz, C-1 $\alpha$ ), 78.9 (C-4 $\alpha$ ), 73.6 (CH<sub>2</sub> Bn $\beta$ ), 73.6, 72.9 (CH<sub>2</sub> Bn $\alpha$ ), 72.1 (CH<sub>2</sub> Bn $\beta$ ), 68.3 (C-5 $\beta$ ), 68.2 (C-5 $\alpha$ ), 37.4 (d,  $J = 7.6$  Hz, CH<sub>2</sub> allylic $\beta$ ), 33.1 (d,  $J = 10.3$  Hz, CH<sub>2</sub> allylic $\alpha$ );  $^{19}\text{F}$  NMR ( $\text{CDCl}_3$ , 471 MHz):  $\delta$  -183.53 (dddd, 0.3F,  $J = 52.6, 28.0, 13.2, 1.8$  Hz), -201.43 (dddd, 0.7F,  $J = 51.4, 31.9, 9.9, 2.5$  Hz);  $^{13}\text{C}$  HSQC-HECADE NMR ( $\text{CDCl}_3$ , 126 MHz):  $\alpha$ -anomer:  $^2J_{\text{C}_1,\text{H}_2} = +5.0$  Hz,  $^2J_{\text{C}_2,\text{H}_1} = +4.5$  Hz,  $^3J_{\text{Callyl},\text{H}_2} = +0.3$  Hz,  $\beta$ -anomer:  $^2J_{\text{C}_1,\text{H}_2} = +1.3$  Hz,  $^2J_{\text{C}_2,\text{H}_1} = -5.4$  Hz,  $^3J_{\text{Callyl},\text{H}_2} = +2.8$  Hz; HRMS:  $[\text{M}+\text{Na}]^+$  calcd for  $\text{C}_{22}\text{H}_{25}\text{FO}_3\text{Na}$  379.1685, found 379.1685.

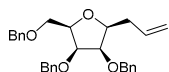

**Allyl 2,3,5-tri-O-benzyl-1-deoxy- $\beta$ -D-lyxofuranoside (77).**  $R_f$ : 0.47 (9/1 pentane/EtOAc).  $^1\text{H}$  NMR ( $\text{CDCl}_3$ , 400 MHz, HH-COSY, HSQC):  $\delta$  7.36 – 7.24 (m, 15H,  $\text{CH}_{\text{arom}}$ ), 5.82 (ddt, 1H,  $J = 17.1, 10.2, 7.0$  Hz, CH allyl), 5.07

(dq, 1H,  $J = 17.1, 1.5$  Hz, CHH allyl), 5.02 (ddt, 1H,  $J = 10.2, 2.2, 1.2$  Hz, CHH allyl), 4.76 (d, 1H,  $J = 11.8$  Hz, CHH Bn), 4.68 (d, 1H,  $J = 11.9$  Hz, CHH Bn), 4.61 (d, 1H,  $J = 11.9$  Hz, CHH Bn), 4.59 (d, 1H,  $J = 12.1$  Hz, CHH Bn), 4.54 (d, 1H,  $J = 11.8$  Hz, CHH Bn), 4.52 (d, 1H,  $J = 12.1$  Hz, CHH Bn), 4.24 – 4.19 (m, 1H, H-4), 4.17 (dd, 1H,  $J = 6.1, 3.9$  Hz, H-3), 4.01 – 3.94 (m, 2H, H-1, H-2), 3.83 (dd, 1H,  $J = 10.1, 4.8$  Hz, H-5), 3.72 (dd, 1H,  $J = 10.1, 6.6$  Hz, H-5), 2.53 – 2.46 (m, 2H, CH<sub>2</sub> allylic);  $^{13}\text{C}$ -APT NMR ( $\text{CDCl}_3$ , 101 MHz, HSQC):  $\delta$  138.6, 138.5, 138.4 ( $\text{C}_q$  Bn), 135.6 (CH allyl), 128.5, 128.4, 128.4, 127.9, 127.7, 127.7, 127.6, 127.5 ( $\text{CH}_{\text{arom}}$ ), 116.7 (CH<sub>2</sub> allyl), 79.6 (C-3), 79.1 (C-1), 78.9 (C-2), 78.0 (C-4), 73.4, 73.3, 73.3 (CH<sub>2</sub> Bn), 70.5 (C-5), 35.4 (CH

allylic);  $^{13}\text{C}$  HSQC-HECADE NMR ( $\text{CDCl}_3$ , 101 MHz):  $^2J_{\text{C}1,\text{H}2} = +1.0$  Hz,  $^2J_{\text{C}2,\text{H}1} = +1.5$  Hz,  $^3J_{\text{H}2,\text{C-allyl}} = +1.6$  Hz; HRMS:  $[\text{M}+\text{H}]^+$  calcd for  $\text{C}_{29}\text{H}_{33}\text{O}_4$  445.23709, found 445.23704.

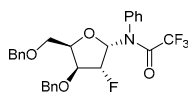

**3,5-di-O-benzyl-1,2-dideoxy-2-fluoro-1-N-[phenyl]trifluoroacetyl- $\alpha/\beta$ -D-xylofuranoside (78).** IR (thin film): 698, 737, 1070, 1153, 1188, 1207, 1454, 1495, 1595, 1690, 2862, 2922;  $^1\text{H}$  NMR ( $\text{CDCl}_3$ , 500 MHz, HH-COSY, HSQC):  $\delta$  7.43 – 7.19 (m, 15H,  $\text{CH}_{\text{arom}}$ ), 6.31 (dd, 1H,  $J = 11.0, 5.1$  Hz, H-1), 5.45 (ddd, 1H,  $J = 52.9, 5.0, 3.8$  Hz, H-2), 4.65 (d, 1H,  $J = 11.9$  Hz,  $\text{CHH}$  Bn), 4.47 (d, 1H,  $J = 11.9$  Hz,  $\text{CHH}$  Bn), 4.40 (s, 2H,  $\text{CH}_2$  Bn), 3.91 (dt, 1H,  $J = 14.3, 4.1$  Hz, H-3), 3.77 (qd, 1H,  $J = 4.7, 1.7$  Hz, H-4), 3.56 (ddd, 1H,  $J = 10.5, 4.4, 0.7$  Hz, H-5), 3.49 (dd, 1H,  $J = 10.6, 4.8$  Hz, H-5);  $^{13}\text{C}$ -APT NMR ( $\text{CDCl}_3$ , 101 MHz, HSQC):  $\delta$  138.0, 137.1 ( $\text{C}_q$ ), 134.2, 132.0, 130.5, 129.6, 128.6, 128.5, 128.2, 127.9, 127.8, 127.7 ( $\text{CH}_{\text{arom}}$ ), 93.5 (d,  $J = 194.8$  Hz, C-2), 87.2 (d,  $J = 17.4$  Hz, C-1), 80.1 (d,  $J = 23.2$  Hz, C-3), 79.1 (d,  $J = 3.5$  Hz, C-4), 73.4, 72.6 ( $\text{CH}_2$  Bn), 68.0 (C-5);  $^{19}\text{F}$  NMR ( $\text{CDCl}_3$ , 471 MHz):  $\delta$  -68.17 (s, 3F,  $\text{CF}_3$ ), -196.37 (dt, 1F,  $J = 53.1, 12.7$  Hz, F-2).

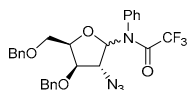

**2-azido-3,5-di-O-benzyl-1,2-dideoxy-1-N-[phenyl]trifluoroacetyl- $\alpha/\beta$ -D-xylofuranoside (79).** Intermixed with **76**. The anomeric amide was formed in an  $\alpha:\beta = 93:7$  ratio. Data for the  $\alpha$ -anomer:  $^1\text{H}$  NMR ( $\text{CDCl}_3$ , 500 MHz, HH-COSY, HSQC):  $\delta$  7.17 (dd, 2H,  $J = 6.6, 2.6$  Hz, NPh), 6.33 (d, 1H,  $J = 6.6$  Hz, H-1), 4.59 (t, 1H,  $J = 6.6$  Hz, H-2), 4.50 (d, 1H,  $J = 11.7$  Hz,  $\text{CHH}$  Bn), 4.46 – 4.40 (m, 3H,  $\text{CH}_2$  Bn,  $\text{CHH}$  Bn), 3.66 (t, 1H,  $J = 4.3$  Hz, H-4), 3.59 (t, 1H,  $J = 6.8$  Hz, H-3), 3.49 (dd, 1H,  $J = 10.7, 4.0$  Hz, H-5), 3.41 (dd, 1H,  $J = 10.7, 4.5$  Hz, H-5);  $^{13}\text{C}$ -APT NMR ( $\text{CDCl}_3$ , 126 MHz, HSQC):  $\delta$  157.0 (q,  $J = 36.4$  Hz,  $\text{F}_3\text{C-C=O}$ ), 138.0, 137.0 ( $\text{C}_q$ ), 132.0, 130.7, 129.6, 129.5, 128.7, 128.3, 128.1, 127.8, 127.8, 127.7, 126.5, 120.6 ( $\text{CH}_{\text{arom}}$ ), 116.0 (q,  $J = 288.7$  Hz,  $\text{CF}_3$ ), 86.9 (C-1), 80.9 (C-3), 78.6 (C-4), 73.5, 73.3 ( $\text{CH}_2$  Bn), 68.6 (C-5), 67.1 (C-2);  $^{19}\text{F}$  NMR ( $\text{CDCl}_3$ , 471 MHz):  $\delta$  -68.04 (s,  $\text{CF}_3,\alpha$ ), -68.18 (s,  $\text{CF}_3,\beta$ );  $^{13}\text{C}$  HSQC-HECADE NMR ( $\text{CDCl}_3$ , 126 MHz):  $\alpha$ -anomer:  $^2J_{\text{C}1,\text{H}2} = -0.2$  Hz,  $^2J_{\text{C}2,\text{H}1} = +1.1$  Hz; Diagnostic peaks for the  $\beta$ -anomer:  $^1\text{H}$  NMR ( $\text{CDCl}_3$ , 500 MHz, HH-COSY, HSQC): 5.98 (d, 0.07H,  $J = 6.2$  Hz, H-1), 4.28 (td, 0.07H,  $J = 6.3, 4.6$  Hz, H-4);  $^{13}\text{C}$  HSQC-HECADE NMR:  $^2J_{\text{C}1,\text{H}2} = -4.0$  Hz,  $^2J_{\text{C}2,\text{H}1} = -2.1$  Hz.

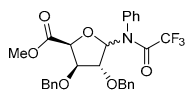

**Methyl (2,3-di-O-benzyl-1-deoxy-1-N-[phenyl]trifluoroacetyl- $\alpha/\beta$ -D-xylofuranosyl uronate) (80).**  $^1\text{H}$  NMR ( $\text{CDCl}_3$ , 500 MHz, HH-COSY, HH-NOESY, HSQC, HMBC):  $\delta$  7.41 – 7.28 (m, 18H,  $\text{CH}_{\text{arom}}$ ), 7.15 (dd, 2H,  $J = 7.3, 2.0$  Hz,  $\text{CH}_{\text{arom}}$ ), 6.59 (d, 1H,  $J = 6.1$  Hz, H-1), 4.70 (d, 1H,  $J = 11.2$  Hz,  $\text{CHH}$  Bn), 4.58 (d, 1H,  $J = 11.2$  Hz,  $\text{CHH}$  Bn), 4.51 (t, 1H,  $J = 6.1$  Hz, H-2), 4.44 (d, 1H,  $J = 11.7$  Hz,  $\text{CHH}$  Bn), 4.38 (d, 1H,  $J = 11.9$  Hz,  $\text{CHH}$  Bn), 4.15 (d, 1H,  $J = 6.5$  Hz, H-4), 3.77 – 3.72 (m, 1H, H-3), 3.67 (s, 3H,  $\text{CH}_3$   $\text{CO}_2\text{Me}$ );  $^{13}\text{C}$ -APT NMR ( $\text{CDCl}_3$ , 126 MHz, HSQC, HMBC):  $\delta$  169.5 (C=O), 137.3, 137.1 ( $\text{C}_q$ ), 129.6, 128.7, 128.6, 128.5, 128.3, 128.2, 128.1, 127.9 ( $\text{CH}_{\text{arom}}$ ), 87.6 (C-1), 81.9 (C-2), 81.1 (C-3), 78.2 (C-4), 74.3, 72.9 ( $\text{CH}_2$  Bn), 52.3 ( $\text{CO}_2\text{Me}$ );  $^{19}\text{F}$  NMR ( $\text{CDCl}_3$ , 471 MHz):  $\delta$  -68.09;  $^{13}\text{C}$  HSQC-HECADE NMR ( $\text{CDCl}_3$ , 126 MHz):  $^2J_{\text{C}1,\text{H}2} = +1.5$  Hz.

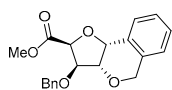

**Methyl (2S,3R,3aS,9bR)-3-(benzyloxy)-3,3a,5,9b-tetrahydro-2H-furo[3,2-c]isochromene-2-carboxylate (81).**  $^1\text{H}$  NMR ( $\text{CDCl}_3$ , 500 MHz, HH-COSY, HH-NOESY, HSQC):  $\delta$  7.61 – 7.57 (m, 1H,  $\text{CH}_{\text{arom}}$ ), 7.37 – 7.28 (m, 7H,  $\text{CH}_{\text{arom}}$ ), 7.08 – 7.04 (m, 1H,  $\text{CH}_{\text{arom}}$ ), 5.16 (d, 1H,  $J = 2.8$  Hz, H-1), 4.92 (d, 1H,  $J = 4.9$  Hz, H-4), 4.78 (d, 1H,  $J = 14.6$  Hz,  $\text{CHH}$  Bn ( $\text{C}_{-2}$ )), 4.72 (d, 1H,  $J = 11.9$  Hz,  $\text{CHH}$  Bn ( $\text{C}_{-3}$ )), 4.65 (d, 1H,  $J = 14.8$  Hz,  $\text{CHH}$  Bn ( $\text{C}_{-2}$ )), 4.64 (d, 1H,  $J = 12.0$  Hz,  $\text{CHH}$  Bn ( $\text{C}_{-3}$ )), 4.44 (d, 1H,  $J = 5.1$  Hz, H-3), 4.26 (d, 1H,  $J = 3.0$  Hz, H-2), 3.76 (s, 3H,  $\text{CH}_3$   $\text{CO}_2\text{Me}$ );  $^{13}\text{C}$ -APT NMR ( $\text{CDCl}_3$ , 126 MHz, HSQC):  $\delta$  170.2 (C=O), 134.4, 130.9, 130.3 ( $\text{C}_q$ ), 128.7, 128.6, 128.1, 127.7, 127.7, 124.2 ( $\text{CH}_{\text{arom}}$ ), 85.2 (C-3), 80.4 (C-4), 79.5 (C-2), 74.9 (C-1), 73.2 ( $\text{CH}_2$  Bn ( $\text{C}_{-3}$ )), 67.2 ( $\text{CH}_2$  Bn ( $\text{C}_{-2}$ )), 52.1 ( $\text{CO}_2\text{Me}$ ).

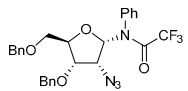

**3,5-di-O-benzyl-1,2-dideoxy-2-fluoro-1-N-[phenyl]trifluoroacetyl- $\alpha$ -D-ribofuranoside (98).** Intermixed with **74**. Diagnostic peaks:  $^1\text{H}$  NMR ( $\text{CDCl}_3$ , 500 MHz):  $\delta$  6.04 (d, 1H,  $J = 5.1$  Hz, H-1), 4.61 (t, 1H,  $J = 5.5$  Hz, H-2), 4.44 (d, 1H,  $J = 11.6$  Hz,  $\text{CHH}$  Bn), 4.41 (d, 1H,  $J = 12.0$  Hz,  $\text{CHH}$  Bn), 4.30 (d, 1H,  $J = 12.0$  Hz,  $\text{CHH}$  Bn), 3.44 (dd, 1H,  $J = 11.3, 2.5$  Hz, H-5), 3.32 (dd, 1H,  $J = 11.3, 3.5$  Hz, H-5);  $^{13}\text{C}$ -APT NMR ( $\text{CDCl}_3$ , 126 MHz, HSQC):  $\delta$  88.1 (C-1), 80.3 (C-4), 77.0 (C-3), 73.4, 73.3 ( $\text{CH}_2$  Bn), 68.0 (C-5), 62.9 (C-2).

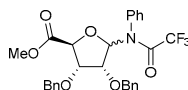

**Methyl (2,3-di-O-benzyl-1-deoxy-1-N-[phenyl]trifluoroacetyl- $\alpha$ -D-ribofuranosyl uronate) (99).**  $^1\text{H}$  NMR ( $\text{CDCl}_3$ , 400 MHz, HH-COSY, HSQC):  $\delta$  7.43 – 7.16 (m, 14H,  $\text{CH}_{\text{arom}}$ ), 7.09 – 7.00 (m, 1H, NPh), 6.44 (d, 1H,  $J = 5.8$  Hz, H-1), 4.75 (d, 1H,  $J = 11.1$  Hz,  $\text{CHH}$  Bn), 4.65 (d, 1H,  $J = 11.0$  Hz,  $\text{CHH}$  Bn), 4.48 – 4.39 (m, 2H,  $\text{CHH}$  Bn, H-2), 4.35 (d, 1H,  $J = 12.0$  Hz,  $\text{CHH}$  Bn), 4.02 – 3.99 (m, 2H, H-3, H-4), 3.67 (s, 3H,  $\text{CH}_3$   $\text{CO}_2\text{Me}$ );  $^{13}\text{C}$ -APT NMR ( $\text{CDCl}_3$ , 101 MHz, HSQC):  $\delta$  170.5 (C=O), 137.4, 137.0, 133.5 ( $\text{C}_q$ ), 132.1, 131.8, 129.1, 128.6, 128.5, 128.3, 128.2, 128.2, 128.1 ( $\text{CH}_{\text{arom}}$ ), 88.5 (C-1), 79.9, 79.0 (C-3, C-4), 77.2 (C-2), 74.5, 72.8 ( $\text{CH}_2$  Bn), 52.7 ( $\text{CO}_2\text{Me}$ );  $^{19}\text{F}$  NMR ( $\text{CDCl}_3$ , 471 MHz):  $\delta$  -68.03.

## Conformational energy landscape calculations

In an adaptation of our previous work,<sup>20</sup> all calculations were performed with Density Functional Theory calculations with the B3LYP hybrid functional. The starting conformer for the Conformational Energy Landscapes (CEL) was obtained by a conformer distribution search in the Spartan 10 program in the gas phase,<sup>21</sup> with a 6-31G(d) basis set. All resulting geometries were further optimized at the 6-311G(d,p) level in the Gaussian 03 program,<sup>22</sup> with a polarized continuum model (PCM) to correct for solvation in dichloromethane, and further corrected for their zero-point energy (ZPE). The geometry with the lowest, ZPE corrected solvated energy, was selected and used as the starting geometry for the CEL. Two dihedral angles of the five-membered ring were constrained: C4-O4-C1-C2 (D3) and C1-C2-C3-C4 (D1) by scanning with 10° per step, over 9 steps (-40° to 40°), totaling 81 conformations spanning the entire pseudo rotational sphere with a maximum puckering amplitude ( $\tau_m$ ) of 40°. All other internal coordinates were unconstrained. Three separate staggered rotamers (*gg*, *gt*, *tg*) of the O4-C4-C5-O5 dihedral angle (-65°, 65°, 175°) were considered and their CEL maps were calculated separately by pre-rotating the C4-C5 bond (not constrained), bringing the total conformations for each configuration to 243 geometries. The final denoted free Gibbs energy was calculated using Equation (1) in which  $\Delta E_{gas}$  is the gas-phase energy (electronic energy),  $\Delta G_{gas,QH}^T$  (T = reaction temperature and pressure = 1 atm.) is the sum of corrections from the electronic energy to free Gibbs energy in the quasi-harmonic oscillator approximation also including zero-point-vibrational energy, and  $\Delta G_{solv}$  is their corresponding free solvation Gibbs energy. The  $\Delta G_{gas,QH}^T$  were computed using the quasi-harmonic approximation in the gas phase according to the work of Truhlar. The quasi-harmonic approximation is the same as the harmonic oscillator approximation except that vibrational frequencies lower than 100 cm<sup>-1</sup> were raised to 100 cm<sup>-1</sup> as a way to correct for the breakdown of the harmonic oscillator model for the free energies of low-frequency vibrational modes.

$$\begin{aligned}\Delta G_{in\ solution}^T &= \Delta E_{gas} + \Delta G_{gas,QH}^T + \Delta G_{solv} \\ &= \Delta G_{gas}^T + \Delta G_{solv}\end{aligned}\tag{1}$$

All found minima were checked for negative frequencies. The CEL was visualized as a polar contour plot by the Origin pro 9 software, with the energy plotted as 0.5 kcal·mol<sup>-1</sup> colored intervals, the phase angle P as the azimuth angle and the puckering amplitude ( $\tau_m$ ) as the radius, with a smoothing factor of 0.001.

D-ribose oxocarbenium ion (82)

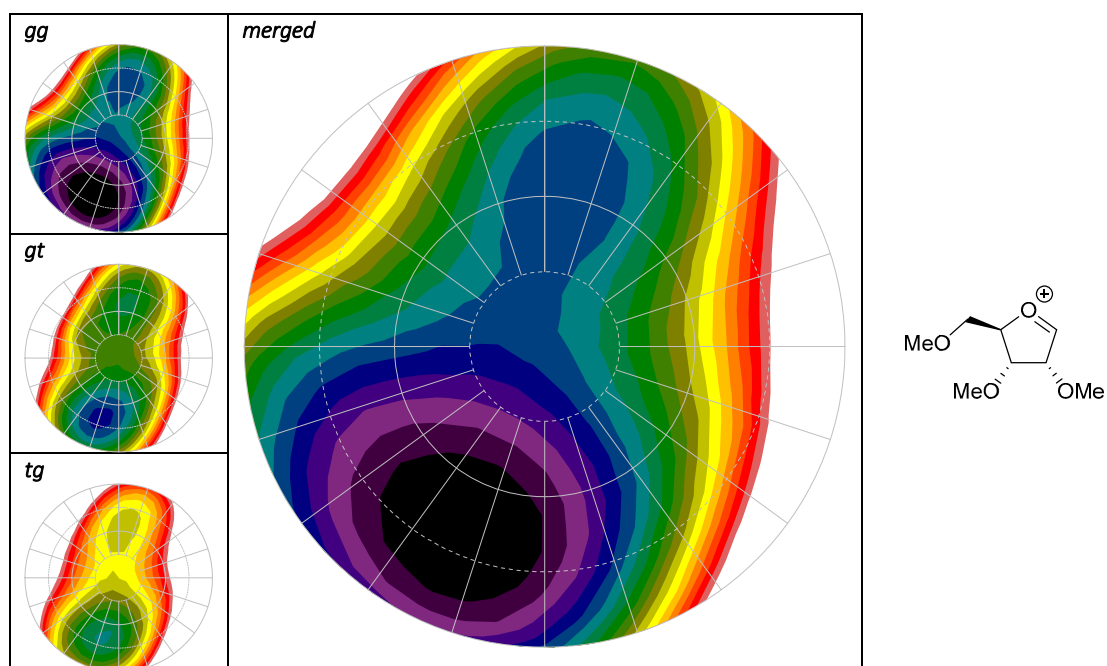

Local minima

$E_3$  conformation (0.0 kcal / mol)

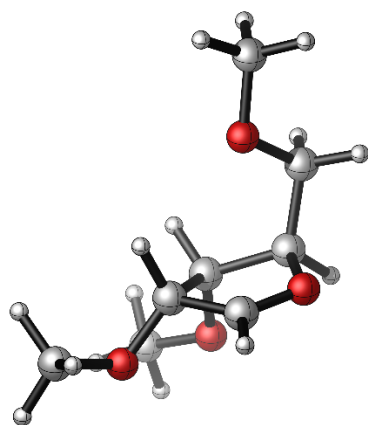

D1 =  $-20^\circ$       P =  $198.6^\circ$   
 D3 =  $0^\circ$          $\tau_m = 21.1$

$E_{\text{gas}}(\text{B3LYP}) = -614.607960713$  a.u.

$E_{\text{soln}}(\text{B3LYP}) = -614.675828735$  a.u.

Zero-point energy correction = 0.229998 a.u.

Atom coordinates

|   |           |           |           |
|---|-----------|-----------|-----------|
| C | -0.855997 | 0.953000  | 0.769794  |
| C | 0.320121  | 0.791380  | -0.205010 |
| C | 0.753193  | -0.706461 | -0.002357 |
| C | 0.165063  | -1.021303 | 1.334185  |
| O | -0.664237 | -0.192684 | 1.762579  |
| C | -2.233284 | 0.771095  | 0.178814  |
| O | 1.315697  | 1.694532  | 0.185101  |
| O | 2.133069  | -0.901065 | -0.014193 |
| O | -2.211561 | -0.420133 | -0.578461 |
| C | -3.470746 | -0.737647 | -1.170811 |
| C | 2.233164  | 2.068239  | -0.850705 |
| C | 2.567677  | -2.140795 | -0.596569 |
| H | -0.774275 | 1.853992  | 1.381129  |
| H | -0.004608 | 0.953240  | -1.239309 |
| H | 0.213697  | -1.324694 | -0.736824 |
| H | 0.407039  | -1.873970 | 1.980230  |
| H | -2.982553 | 0.725800  | 0.981170  |
| H | -2.448243 | 1.652558  | -0.444003 |
| H | -3.336636 | -1.671607 | -1.714639 |
| H | -4.241515 | -0.870054 | -0.402633 |
| H | -3.784287 | 0.048290  | -1.867705 |
| H | 2.874636  | 2.837234  | -0.422757 |
| H | 2.840704  | 1.217328  | -1.164607 |
| H | 1.693210  | 2.481296  | -1.710585 |
| H | 2.202423  | -2.231047 | -1.625181 |
| H | 3.655486  | -2.110234 | -0.590732 |
| H | 2.226025  | -2.998372 | -0.007815 |

**<sup>4</sup>T<sub>3</sub> conformation (1.1 kcal / mol)**E<sub>gas</sub>(B3LYP) = -614.606333411 a.u.E<sub>solv</sub>(B3LYP) = -614.674656437 a.u.

Zero-point energy correction = 0.230540 a.u.

## Atom coordinates

|   |           |           |           |
|---|-----------|-----------|-----------|
| C | -0.808253 | 0.938588  | 0.838045  |
| C | 0.326053  | 0.843801  | -0.195014 |
| C | 0.691229  | -0.690242 | -0.199781 |
| C | -0.079824 | -1.202261 | 0.980021  |
| O | -0.652655 | -0.322710 | 1.663978  |
| C | -2.199576 | 0.833776  | 0.250076  |
| O | 1.368825  | 1.665039  | 0.248234  |
| O | 2.033907  | -0.929485 | 0.138872  |
| O | -2.180761 | -0.294625 | -0.600110 |
| C | -3.462563 | -0.661659 | -1.113732 |
| C | 2.315703  | 2.018837  | -0.763812 |
| C | 2.625835  | -2.074518 | -0.500188 |
| H | -0.687838 | 1.768274  | 1.535461  |
| H | -0.031634 | 1.138384  | -1.188815 |
| H | 0.385410  | -1.170439 | -1.136620 |
| H | -0.031634 | -2.212164 | 1.401461  |
| H | -2.943679 | 0.724534  | 1.050012  |
| H | -2.409485 | 1.761242  | -0.301648 |
| H | -3.312106 | -1.547560 | -1.728793 |
| H | -4.156886 | -0.894088 | -0.298501 |
| H | -3.878422 | 0.143490  | -1.729311 |
| H | 3.003854  | 2.726477  | -0.303615 |
| H | 2.873624  | 1.144960  | -1.109826 |
| H | 1.812887  | 2.498358  | -1.612142 |
| H | 2.569355  | -1.971314 | -1.588549 |
| H | 3.665327  | -2.090892 | -0.178285 |
| H | 2.135082  | -3.002940 | -0.192301 |

**<sup>4</sup>E conformation (1.1 kcal / mol)**E<sub>gas</sub>(B3LYP) = -614.607154588 a.u.E<sub>solv</sub>(B3LYP) = -614.674729958 a.u.

Zero-point energy correction = 0.230406 a.u.

## Atom coordinates

|   |           |           |           |
|---|-----------|-----------|-----------|
| C | 0.777119  | -1.170163 | 0.589800  |
| C | -0.417084 | -0.844042 | -0.317812 |
| C | -0.604048 | 0.703948  | -0.094560 |
| C | 0.112932  | 0.900437  | 1.211712  |
| O | 0.619366  | -0.137511 | 1.699774  |
| C | 2.157694  | -0.938825 | 0.018661  |
| O | -1.503413 | -1.599348 | 0.133711  |
| O | -1.938046 | 1.064606  | 0.136699  |
| O | 2.173776  | 0.360826  | -0.532147 |
| C | 3.470084  | 0.794945  | -0.952045 |

|   |           |           |           |
|---|-----------|-----------|-----------|
| C | -2.548253 | -1.785087 | -0.828736 |
| C | -2.310148 | 2.360271  | -0.363321 |
| H | 0.678634  | -2.140431 | 1.078467  |
| H | -0.176227 | -1.048153 | -1.369130 |
| H | -0.129389 | 1.266490  | -0.903776 |
| H | 0.070039  | 1.787813  | 1.852986  |
| H | 2.906327  | -1.044398 | 0.815686  |
| H | 2.346135  | -1.711821 | -0.740315 |
| H | 3.352272  | 1.806485  | -1.337437 |
| H | 4.169544  | 0.801426  | -0.108786 |
| H | 3.857124  | 0.144868  | -1.744057 |
| H | -3.267660 | -2.460103 | -0.367386 |
| H | -3.037162 | -0.838763 | -1.068703 |
| H | -2.151734 | -2.244094 | -1.741885 |
| H | -2.129591 | 2.417736  | -1.441707 |
| H | -3.373016 | 2.468001  | -0.155652 |
| H | -1.758531 | 3.157464  | 0.145195  |

**<sup>3</sup>E conformation (1.9 kcal / mol)**E<sub>gas</sub>(B3LYP) = -614.605473408 a.u.E<sub>solv</sub>(B3LYP) = -614.672694683 a.u.

Zero-point energy correction = 0.229720 a.u.

## Atom coordinates

|   |           |           |           |
|---|-----------|-----------|-----------|
| C | 0.713766  | -1.309936 | 0.275273  |
| C | -0.517851 | -0.755006 | -0.440311 |
| C | -0.574225 | 0.683325  | 0.164313  |
| C | -0.214560 | 0.352467  | 1.579411  |
| O | 0.466301  | -0.691783 | 1.695841  |
| C | 2.107338  | -0.959935 | -0.177701 |
| O | -1.617243 | -1.536966 | -0.080001 |
| O | -1.815532 | 1.302811  | 0.047171  |
| O | 2.233311  | 0.427666  | -0.392994 |
| C | 3.552340  | 0.816115  | -0.780448 |
| C | -2.731827 | -1.488402 | -0.984830 |
| C | -1.764591 | 2.708529  | -0.240536 |
| H | 0.629638  | -2.382314 | 0.464521  |
| H | -0.360141 | -0.713490 | -1.526956 |
| H | 0.262559  | 1.261855  | -0.252190 |
| H | -0.493300 | 0.891112  | 2.493291  |
| H | 2.821188  | -1.310662 | 0.581537  |
| H | 2.288462  | -1.535269 | -1.099597 |
| H | 3.537174  | 1.897515  | -0.906926 |
| H | 4.279982  | 0.548533  | -0.005706 |
| H | 3.836382  | 0.341120  | -1.726369 |
| H | -3.438081 | -2.236743 | -0.628655 |
| H | -3.198973 | -0.502866 | -0.978952 |
| H | -2.410134 | -1.745509 | -2.000176 |
| H | -1.214414 | 2.892993  | -1.169527 |
| H | -2.797281 | 3.032011  | -0.355951 |
| H | -1.300099 | 3.264956  | 0.580483  |

4-CO<sub>2</sub>Me-D-ribose oxocarbenium ion (83)

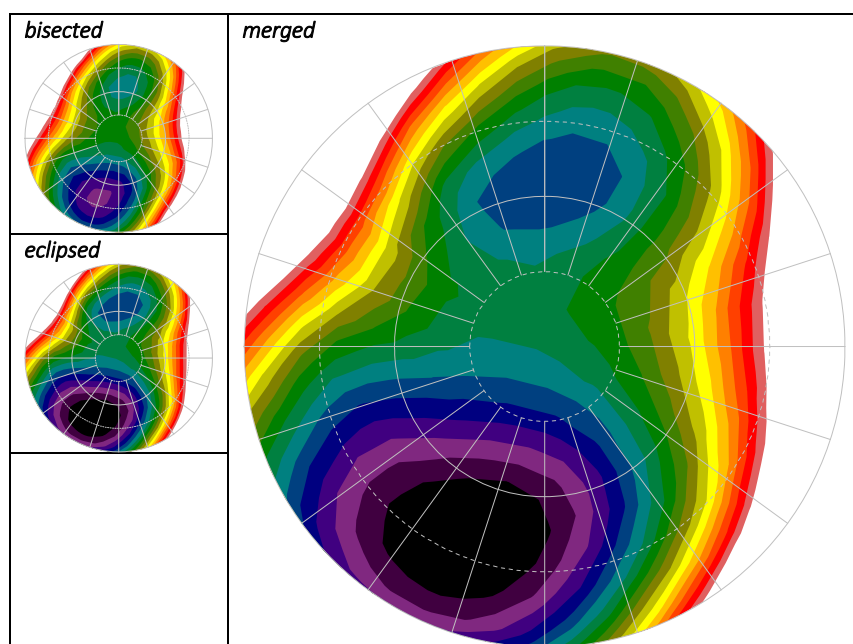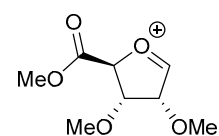

Local minima

*E*<sub>3</sub> conformation (0.0 kcal / mol)

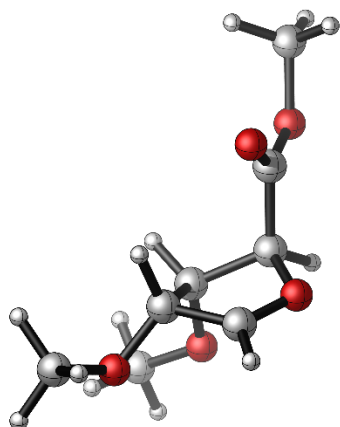

D1 = -30°      P = 198.1°  
D3 = 0°      τ<sub>m</sub> = 31.6

*E*<sub>gas</sub>(B3LYP) = -688.657855795 a.u.

*E*<sub>solv</sub>(B3LYP) = -688.728244100 a.u.

Zero-point energy correction = 0.211450 a.u.

Atom coordinates

|   |           |           |           |
|---|-----------|-----------|-----------|
| C | 0.430113  | 0.730224  | -0.129081 |
| C | 1.193014  | -0.647608 | -0.167617 |
| C | 0.823447  | -1.199659 | 1.169368  |
| O | -0.197359 | -0.682018 | 1.682133  |
| C | -0.765612 | 0.373934  | 0.772094  |
| C | -1.932093 | -0.285629 | 0.036350  |
| O | -2.895223 | 0.592539  | -0.169479 |
| C | -4.059873 | 0.121027  | -0.905839 |
| O | -1.911938 | -1.439883 | -0.310068 |
| O | 1.158901  | 1.722830  | 0.517772  |
| O | 2.567040  | -0.502678 | -0.318247 |
| C | 1.987486  | 2.538435  | -0.327875 |
| C | 3.217322  | -1.539280 | -1.073274 |
| H | 0.110653  | 1.020945  | -1.139098 |
| H | 0.724538  | -1.291775 | -0.933040 |
| H | 1.349731  | -1.962434 | 1.755698  |
| H | -1.077691 | 1.188197  | 1.427553  |
| H | -3.755809 | -0.231886 | -1.891013 |
| H | -4.541118 | -0.682613 | -0.349144 |
| H | -4.711427 | 0.986422  | -0.984544 |
| H | 2.797426  | 1.951439  | -0.762637 |
| H | 1.386200  | 2.999429  | -1.119017 |
| H | 2.396574  | 3.314353  | 0.316746  |
| H | 4.261921  | -1.244479 | -1.148572 |
| H | 3.147068  | -2.504516 | -0.561550 |
| H | 2.777736  | -1.618062 | -2.073037 |

**$^4T_3$  conformation (0.3 kcal / mol)** $E_{\text{gas}}(\text{B3LYP}) = -688.657512962$  a.u. $E_{\text{solv}}(\text{B3LYP}) = -688.728181859$  a.u.

Zero-point energy correction = 0.211760 a.u.

## Atom coordinates

|   |           |           |           |
|---|-----------|-----------|-----------|
| C | 0.413742  | 0.715390  | -0.119144 |
| C | 1.225335  | -0.635968 | -0.256855 |
| C | 0.728197  | -1.409359 | 0.921555  |
| O | -0.221620 | -0.879221 | 1.547491  |
| C | -0.758241 | 0.287521  | 0.785735  |
| C | -1.935811 | -0.273127 | -0.014378 |
| O | -2.954159 | 0.562526  | -0.005468 |
| C | -4.125468 | 0.170733  | -0.778254 |
| O | -1.863878 | -1.333177 | -0.585834 |
| O | 1.118653  | 1.703446  | 0.561566  |
| O | 2.602536  | -0.458568 | -0.127958 |
| C | 1.931268  | 2.554864  | -0.260029 |
| C | 3.411502  | -1.316550 | -0.953354 |
| H | 0.065270  | 1.048113  | -1.106135 |
| H | 0.927467  | -1.150690 | -1.185395 |
| H | 1.176220  | -2.308021 | 1.360874  |
| H | -1.042734 | 1.035727  | 1.525851  |
| H | -3.847546 | 0.031088  | -1.822578 |
| H | -4.537482 | -0.751792 | -0.370189 |
| H | -4.824217 | 0.994491  | -0.665638 |
| H | 2.753453  | 1.995638  | -0.710140 |
| H | 1.323371  | 3.026276  | -1.040315 |
| H | 2.328573  | 3.320669  | 0.403872  |
| H | 4.440724  | -1.004426 | -0.788427 |
| H | 3.297381  | -2.365786 | -0.664147 |
| H | 3.144112  | -1.192354 | -2.007663 |

|   |           |           |           |
|---|-----------|-----------|-----------|
| H | 0.076210  | 0.624128  | 1.378812  |
| H | -2.152560 | -0.253865 | 1.524948  |
| H | -1.721199 | -2.702233 | 0.395833  |
| H | 0.446418  | -0.268486 | -1.529653 |
| H | 4.140908  | 0.729214  | 0.919800  |
| H | 4.614363  | -0.259441 | -0.491298 |
| H | 4.407031  | 1.512538  | -0.671680 |
| H | -2.105071 | 2.517529  | 0.731109  |
| H | -0.471438 | 2.918283  | 1.342704  |
| H | -1.049522 | 3.606208  | -0.199492 |
| H | -4.440129 | -0.073256 | -1.204547 |
| H | -4.210018 | -1.287191 | 0.080501  |
| H | -4.210593 | 0.455890  | 0.48995   |

 **$^3E$  conformation (2.5 kcal / mol)** $E_{\text{gas}}(\text{B3LYP}) = -688.648674301$  a.u. $E_{\text{solv}}(\text{B3LYP}) = -688.723230292$  a.u.

Zero-point energy correction = 0.211721 a.u.

## Atom coordinates

|   |           |           |           |
|---|-----------|-----------|-----------|
| C | -0.356994 | 0.468650  | 0.377262  |
| C | -1.660920 | -0.376980 | 0.553145  |
| C | -1.171957 | -1.760545 | 0.282157  |
| O | -0.031698 | -1.822524 | -0.240297 |
| C | 0.546043  | -0.462668 | -0.456862 |
| C | 1.999428  | -0.529932 | -0.009858 |
| O | 2.662702  | 0.485792  | -0.541563 |
| C | 4.059558  | 0.618723  | -0.161445 |
| O | 2.430982  | -1.365571 | 0.740028  |
| O | -0.509969 | 1.658124  | -0.322883 |
| O | -2.525543 | -0.195287 | -0.554164 |
| C | -1.069496 | 2.728862  | 0.444257  |
| C | -3.935026 | -0.286706 | -0.264649 |

2-N<sub>3</sub>-D-ribose oxocarbenium ion (84)

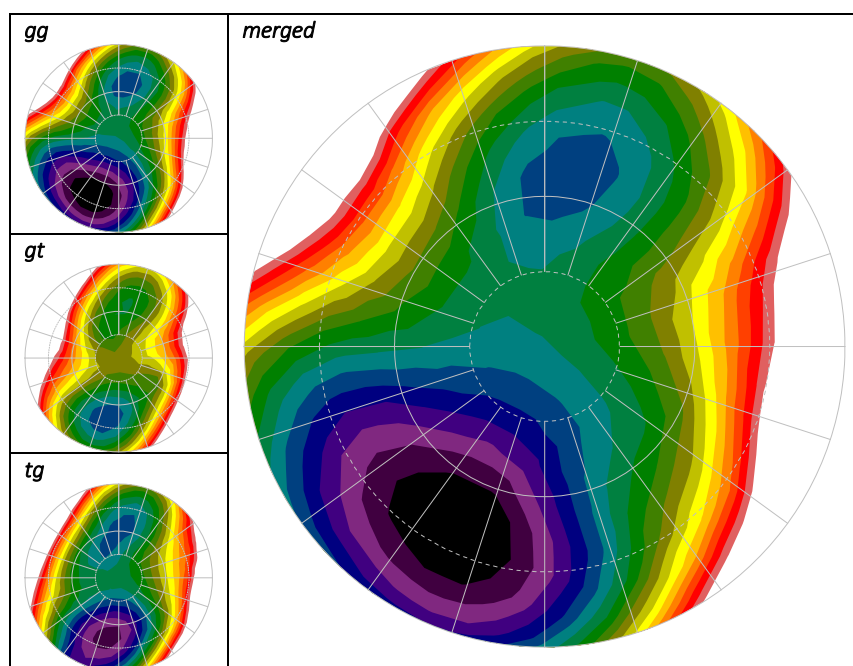

Local minima

<sup>4</sup>T<sub>3</sub> conformation (0.0 kcal / mol)

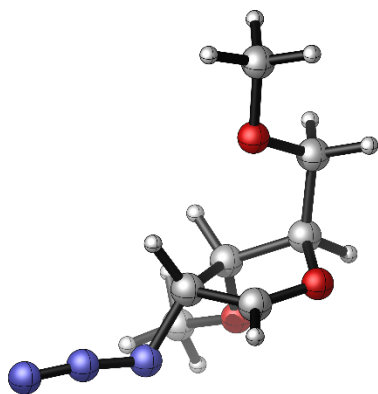

D1 = -20°      P = 219.4°  
D3 = 10°      τ<sub>m</sub> = 25.9

E<sub>gas</sub>(B3LYP) = -663.673787863 a.u.

E<sub>solv</sub>(B3LYP) = -663.748259231 a.u.

Zero-point energy correction = 0.200834 a.u.

Atom coordinates

|   |           |           |           |
|---|-----------|-----------|-----------|
| C | 0.063291  | 0.936029  | -0.289757 |
| C | 0.632750  | -0.478967 | 0.097998  |
| C | -0.032965 | -0.727458 | 1.413184  |
| O | -0.894361 | 0.113897  | 1.745930  |
| C | -1.200030 | 1.045344  | 0.577445  |
| C | -2.484441 | 0.535855  | -0.032500 |
| O | 0.913863  | 1.984137  | 0.074741  |
| O | -2.223556 | -0.747512 | -0.556699 |
| C | -3.386832 | -1.403334 | -1.064500 |
| C | 1.824649  | 2.415159  | -0.944666 |
| N | 2.081586  | -0.482658 | 0.298269  |
| N | 2.690712  | -1.464562 | -0.154261 |
| N | 3.376264  | -2.283223 | -0.515480 |
| H | -0.193333 | 0.956506  | -1.355664 |
| H | 0.287584  | -1.239772 | -0.615911 |
| H | 0.225080  | -1.510255 | 2.135851  |
| H | -1.311143 | 2.032808  | 1.028625  |
| H | -3.272743 | 0.506407  | 0.732342  |
| H | -2.787626 | 1.248629  | -0.813970 |
| H | -4.135755 | -1.534469 | -0.275097 |
| H | -3.825317 | -0.833720 | -1.891566 |
| H | -3.065124 | -2.378682 | -1.426397 |
| H | 2.314566  | 3.305908  | -0.554513 |
| H | 2.576208  | 1.650812  | -1.156458 |
| H | 1.281577  | 2.668982  | -1.861933 |



### **E<sub>3</sub> conformation (0.1 kcal / mol)**

E<sub>gas</sub>(B3LYP) = -663.673443200 a.u.

E<sub>solv</sub>(B3LYP) = -663.747948953 a.u.

Zero-point energy correction = 0.200716 a.u.

#### Atom coordinates

|   |           |           |           |
|---|-----------|-----------|-----------|
| C | 0.034408  | 0.890613  | -0.248171 |
| C | 0.696042  | -0.475298 | 0.164618  |
| C | 0.081970  | -0.730165 | 1.497753  |
| O | -0.900920 | -0.015862 | 1.779188  |
| C | -1.216619 | 0.956245  | 0.643632  |
| C | -2.508218 | 0.477976  | 0.026983  |
| O | 0.831977  | 1.993943  | 0.074106  |
| O | -2.255525 | -0.772071 | -0.576126 |
| C | -3.418004 | -1.358351 | -1.162733 |
| C | 1.692563  | 2.458252  | -0.974604 |
| N | 2.151045  | -0.419593 | 0.258431  |
| N | 2.770303  | -1.383848 | -0.216087 |
| N | 3.469398  | -2.178553 | -0.604439 |
| H | -0.239216 | 0.866905  | -1.309038 |
| H | 0.331906  | -1.276898 | -0.499906 |
| H | 0.415088  | -1.462532 | 2.243053  |
| H | -1.321804 | 1.923258  | 1.139880  |
| H | -3.285234 | 0.404687  | 0.800559  |
| H | -2.825569 | 1.234235  | -0.707328 |
| H | -4.193455 | -1.528145 | -0.406775 |
| H | -3.819292 | -0.719046 | -1.957559 |
| H | -3.109671 | -2.312982 | -1.586479 |
| H | 2.149508  | 3.374981  | -0.605217 |
| H | 2.473212  | 1.728352  | -1.200902 |
| H | 1.112204  | 2.677421  | -1.877843 |

### **E<sub>4</sub> conformation (1.4 kcal / mol)**

E<sub>gas</sub>(B3LYP) = -663.672509788 a.u.

E<sub>solv</sub>(B3LYP) = -663.746300564 a.u.

Zero-point energy correction = 0.200954 a.u.

#### Atom coordinates

|   |           |           |           |
|---|-----------|-----------|-----------|
| C | 0.100966  | 1.001271  | -0.332367 |
| C | 0.573346  | -0.469939 | -0.027097 |
| C | -0.141680 | -0.747309 | 1.263181  |
| O | -0.857599 | 0.190608  | 1.685032  |
| C | -1.168760 | 1.125735  | 0.522267  |
| C | -2.456033 | 0.604480  | -0.075370 |
| O | 1.002255  | 1.971322  | 0.115112  |
| O | -2.206147 | -0.703299 | -0.543060 |
| C | -3.385920 | -1.416633 | -0.925102 |
| C | 1.966676  | 2.399309  | -0.854590 |
| N | 2.006874  | -0.541653 | 0.270815  |
| N | 2.594345  | -1.567878 | -0.108252 |
| N | 3.265783  | -2.426653 | -0.395153 |
| H | -0.133270 | 1.107582  | -1.398978 |

|   |           |           |           |
|---|-----------|-----------|-----------|
| H | 0.253556  | -1.165123 | -0.811019 |
| H | 0.030232  | -1.600042 | 1.929886  |
| H | -1.278842 | 2.116401  | 0.965337  |
| H | -3.246508 | 0.613870  | 0.687114  |
| H | -2.748529 | 1.284435  | -0.888730 |
| H | -4.079599 | -1.498506 | -0.081162 |
| H | -3.884677 | -0.917439 | -1.762687 |
| H | -3.065070 | -2.410382 | -1.233407 |
| H | 2.532683  | 3.201248  | -0.383198 |
| H | 2.645833  | 1.587640  | -1.126920 |
| H | 1.465533  | 2.783075  | -1.750313 |

### **E<sub>3</sub> conformation (2.8 kcal / mol)**

E<sub>gas</sub>(B3LYP) = -663.668454842 a.u.

E<sub>solv</sub>(B3LYP) = -663.743609461 a.u.

Zero-point energy correction = 0.200842 a.u.

#### Atom coordinates

|   |           |           |           |
|---|-----------|-----------|-----------|
| C | -0.064156 | 0.624060  | -0.092643 |
| C | 1.072452  | -0.343050 | -0.557249 |
| C | 0.490147  | -1.678510 | -0.228832 |
| O | -0.519971 | -1.649432 | 0.508671  |
| C | -0.894704 | -0.223064 | 0.883522  |
| C | -2.393329 | -0.107708 | 0.792690  |
| O | 0.351252  | 1.763628  | 0.592553  |
| O | -2.773820 | -0.288665 | -0.551221 |
| C | -4.181183 | -0.177128 | -0.752475 |
| C | 0.825478  | 2.820779  | -0.247501 |
| N | 2.216551  | -0.276201 | 0.378688  |
| N | 3.332578  | -0.541019 | -0.102941 |
| N | 4.403982  | -0.730544 | -0.394179 |
| H | -0.668058 | 0.867123  | -0.975470 |
| H | 1.362994  | -0.244035 | -1.609508 |
| H | 0.890308  | -2.659950 | -0.508543 |
| H | -0.539783 | -0.114244 | 1.913546  |
| H | -2.860658 | -0.854521 | 1.449816  |
| H | -2.662201 | 0.891922  | 1.169881  |
| H | -4.722096 | -0.937998 | -0.177041 |
| H | -4.542670 | 0.817590  | -0.464663 |
| H | -4.360412 | -0.333294 | -1.815412 |
| H | 1.030820  | 3.663577  | 0.410128  |
| H | 1.747623  | 2.536779  | -0.766027 |
| H | 0.064438  | 3.104873  | -0.982782 |

2-F-D-ribose oxocarbenium ion (85)

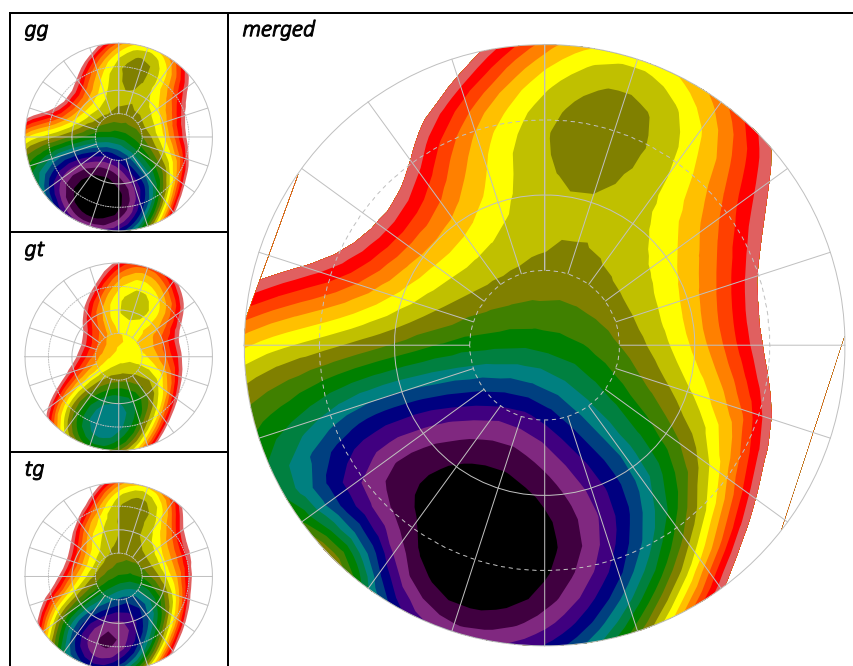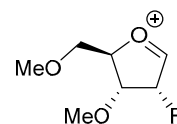

Local minima

$E_3$  conformation (0.0 kcal / mol)

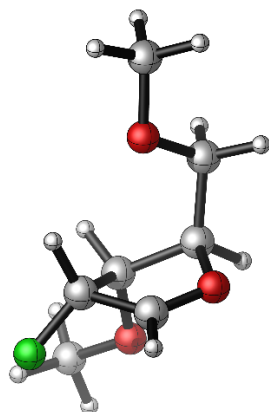

D1 = -30°      P = 198.1°  
D3 = 0°       $\tau_m$  = 31.6

$E_{\text{gas}}(\text{B3LYP}) = -599.309735677$  a.u.  
 $E_{\text{solv}}(\text{B3LYP}) = -599.383496458$  a.u.  
Zero-point energy correction = 0.190013 a.u.

Atom coordinates

|   |           |           |           |
|---|-----------|-----------|-----------|
| C | -0.713537 | -0.533413 | -0.189527 |
| C | -0.606203 | 0.993354  | -0.469373 |
| C | -0.166341 | 1.510503  | 0.862487  |
| O | 0.339719  | 0.645323  | 1.602439  |
| C | 0.355412  | -0.728468 | 0.894496  |
| C | 1.774392  | -0.975382 | 0.449953  |
| O | -1.952600 | -0.864726 | 0.368650  |
| O | 2.101647  | -0.011976 | -0.525483 |
| C | 3.450282  | -0.103400 | -0.987687 |
| C | -2.971373 | -1.223813 | -0.577927 |
| F | -1.785082 | 1.581733  | -0.857111 |
| H | -0.476504 | -1.120054 | -1.086389 |
| H | 0.185551  | 1.217248  | -1.197267 |
| H | -0.250301 | 2.538522  | 1.236986  |
| H | 0.035828  | -1.425439 | 1.672193  |
| H | 2.446138  | -0.916816 | 1.317849  |
| H | 1.817718  | -2.000802 | 0.051860  |
| H | 3.633963  | -1.073000 | -1.464130 |
| H | 3.586158  | 0.692023  | -1.718766 |
| H | 4.155183  | 0.035744  | -0.160110 |
| H | -3.834644 | -1.526081 | 0.012416  |
| H | -3.240427 | -0.377617 | -1.213548 |
| H | -2.638840 | -2.064581 | -1.196484 |

**<sup>4</sup>T<sub>3</sub> conformation (0.5 kcal / mol)**E<sub>gas</sub>(B3LYP) = -599.308567619 a.u.E<sub>solv</sub>(B3LYP) = -599.382833168 a.u.

Zero-point energy correction = 0.190254 a.u.

## Atom coordinates

|   |           |           |           |
|---|-----------|-----------|-----------|
| C | -0.712835 | -0.540374 | -0.149087 |
| C | -0.626817 | 0.970289  | -0.540936 |
| C | 0.022648  | 1.581432  | 0.664363  |
| O | 0.416475  | 0.764180  | 1.517977  |
| C | 0.338366  | -0.659432 | 0.965530  |
| C | 1.743116  | -0.983051 | 0.511201  |
| O | -1.955092 | -0.864928 | 0.407451  |
| O | 2.046389  | -0.089397 | -0.537873 |
| C | 3.394023  | -0.181348 | -1.005980 |
| C | -2.958681 | -1.252396 | -0.542206 |
| F | -1.850268 | 1.571223  | -0.735891 |
| H | -0.451885 | -1.178409 | -1.002468 |
| H | 0.009826  | 1.131054  | -1.420998 |
| H | 0.099319  | 2.651668  | 0.893737  |
| H | 0.002726  | -1.270693 | 1.805089  |
| H | 2.443360  | -0.875550 | 1.350586  |
| H | 1.754495  | -2.031828 | 0.179697  |
| H | 3.594722  | -1.176971 | -1.416433 |
| H | 3.504583  | 0.564753  | -1.791237 |
| H | 4.101388  | 0.030108  | -0.196347 |
| H | -3.824725 | -1.556755 | 0.043109  |
| H | -3.233060 | -0.419884 | -1.194272 |
| H | -2.609425 | -2.098063 | -1.145191 |

**<sup>4</sup>E conformation (1.4 kcal / mol)**E<sub>gas</sub>(B3LYP) = -599.305963072 a.u.E<sub>solv</sub>(B3LYP) = -599.380668173 a.u.

Zero-point energy correction = 0.190278 a.u.

## Atom coordinates

|   |           |           |           |
|---|-----------|-----------|-----------|
| C | -0.667707 | -0.521031 | -0.055428 |
| C | -0.757723 | 0.913200  | -0.679910 |
| C | 0.002416  | 1.761113  | 0.297043  |
| O | 0.475065  | 1.147452  | 1.270136  |
| C | 0.358140  | -0.361098 | 1.080126  |
| C | 1.759319  | -0.799749 | 0.717015  |
| O | -1.876513 | -0.923748 | 0.525449  |
| O | 2.042964  | -0.199516 | -0.529120 |
| C | 3.370290  | -0.439779 | -1.000768 |
| C | -2.806456 | -1.521772 | -0.387329 |
| F | -2.041919 | 1.408615  | -0.749438 |
| H | -0.308938 | -1.233949 | -0.806176 |
| H | -0.289025 | 0.969799  | -1.671551 |
| H | 0.091637  | 2.854780  | 0.278963  |
| H | 0.006414  | -0.744547 | 2.039621  |
| H | 2.471189  | -0.485266 | 1.491738  |

|   |           |           |           |
|---|-----------|-----------|-----------|
| H | 1.764925  | -1.898248 | 0.660435  |
| H | 3.540604  | -1.511277 | -1.153573 |
| H | 3.463927  | 0.082137  | -1.951810 |
| H | 4.110963  | -0.049305 | -0.293863 |
| H | -3.644762 | -1.864337 | 0.217078  |
| H | -3.162697 | -0.798559 | -1.125680 |
| H | -2.348747 | -2.377557 | -0.896448 |

**<sup>3</sup>E conformation (5.2 kcal / mol)**E<sub>gas</sub>(B3LYP) = -599.297953875 a.u.E<sub>solv</sub>(B3LYP) = -599.374549517 a.u.

Zero-point energy correction = 0.190081 a.u.

## Atom coordinates

|   |           |           |           |
|---|-----------|-----------|-----------|
| C | 0.609740  | 0.395296  | -0.177045 |
| C | 1.595127  | -0.699624 | -0.647516 |
| C | 0.721561  | -1.929480 | -0.550735 |
| O | -0.267921 | -1.778234 | 0.189058  |
| C | -0.305709 | -0.361450 | 0.793074  |
| C | -1.746872 | 0.054376  | 0.873156  |
| O | 1.193741  | 1.449514  | 0.520750  |
| O | -2.261965 | 0.129430  | -0.434250 |
| C | -3.629856 | 0.531588  | -0.472963 |
| C | 1.815202  | 2.442789  | -0.304877 |
| F | 2.589647  | -0.907240 | 0.303268  |
| H | 0.027945  | 0.727620  | -1.048525 |
| H | 2.055923  | -0.558759 | -1.629005 |
| H | 0.883577  | -2.914153 | -1.007513 |
| H | 0.149395  | -0.480743 | 1.782069  |
| H | -2.304358 | -0.663917 | 1.491098  |
| H | -1.767499 | 1.029265  | 1.387059  |
| H | -3.758598 | 1.531231  | -0.040606 |
| H | -3.922260 | 0.550835  | -1.521917 |
| H | -4.264186 | -0.180381 | 0.068533  |
| H | 2.137433  | 3.235888  | 0.367260  |
| H | 2.687525  | 2.037047  | -0.827745 |
| H | 1.102280  | 2.844575  | -1.033152 |

D-arabinose oxocarbenium ion (86)

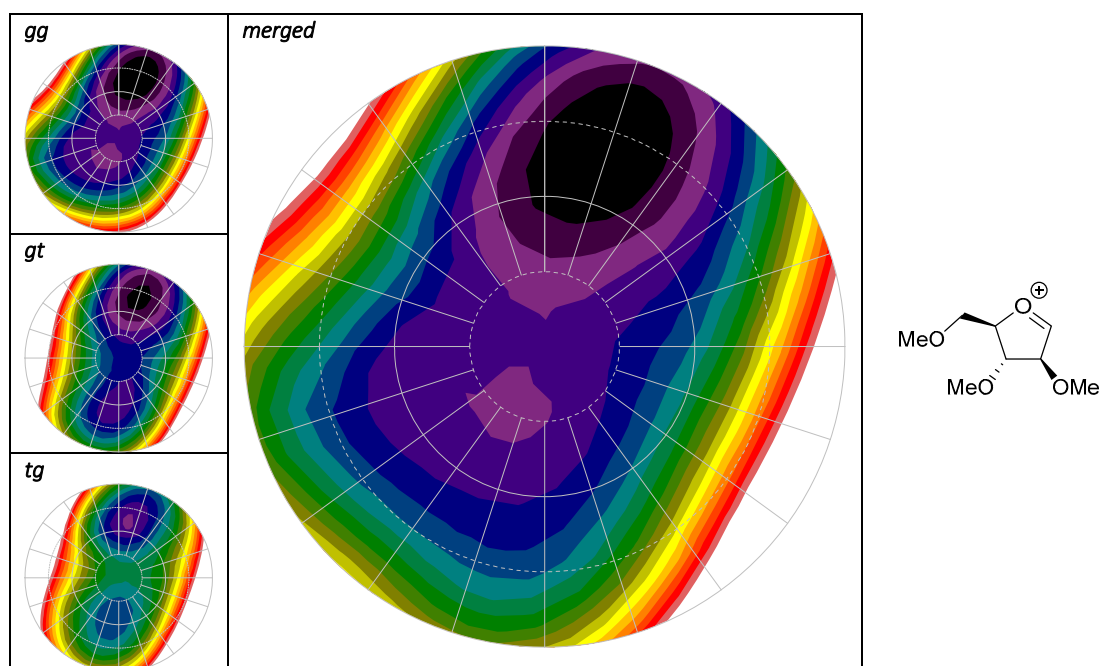

Local minima

<sup>3</sup>E conformation (0.0 kcal / mol)

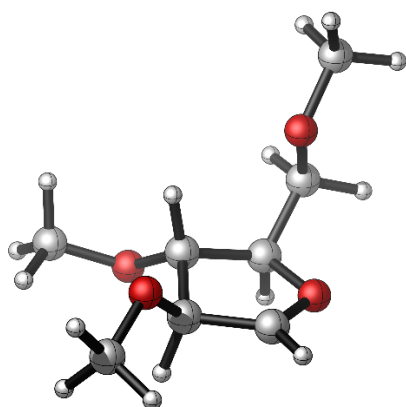

D1 = 20°      P = 18.0°  
D3 = 0°      τ<sub>m</sub> = 21.0

E<sub>gas</sub>(B3LYP) = -614.604741498 a.u.  
E<sub>solv</sub>(B3LYP) = -614.674465019 a.u.  
Zero-point energy correction = 0.229580 a.u.

Atom coordinates

|   |           |           |           |
|---|-----------|-----------|-----------|
| C | 0.867804  | 0.086242  | -1.077616 |
| C | -0.260693 | 0.621400  | -0.180951 |
| C | -1.370602 | -0.464939 | -0.283823 |
| C | -0.598217 | -1.650299 | -0.760272 |
| O | 0.554470  | -1.403215 | -1.174459 |
| O | -1.995300 | -0.718825 | 0.941643  |
| C | 2.277308  | 0.207031  | -0.565591 |
| O | -0.620309 | 1.883509  | -0.662355 |
| O | 2.317559  | -0.319270 | 0.739491  |
| C | 3.608245  | -0.235804 | 1.338076  |
| C | -1.370156 | 2.676331  | 0.265486  |
| C | -3.378324 | -1.099929 | 0.862040  |
| H | 0.768732  | 0.459309  | -2.101997 |
| H | 0.068832  | 0.658342  | 0.864415  |
| H | -2.075722 | -0.177461 | -1.089439 |
| H | -0.914715 | -2.700633 | -0.748657 |
| H | 2.962883  | -0.325036 | -1.240532 |
| H | 2.538930  | 1.277323  | -0.591179 |
| H | 3.522163  | -0.669178 | 2.333603  |
| H | 4.348126  | -0.800945 | 0.758309  |
| H | 3.937027  | 0.807283  | 1.422142  |
| H | -1.472238 | 3.660983  | -0.187516 |
| H | -2.365151 | 2.253726  | 0.440337  |
| H | -0.840224 | 2.762002  | 1.220353  |
| H | -3.723336 | -1.193681 | 1.889842  |
| H | -3.958897 | -0.330157 | 0.342352  |
| H | -3.499954 | -2.059652 | 0.349319  |

**Flat-E<sub>3</sub> conformation (1.2 kcal / mol)** $E_{\text{gas}}(\text{B3LYP}) = -614.604880013$  a.u. $E_{\text{solv}}(\text{B3LYP}) = -614.673300847$  a.u.

Zero-point energy correction = 0.229857 a.u.

## Atom coordinates

|   |           |           |           |
|---|-----------|-----------|-----------|
| C | 0.578887  | -1.186059 | 0.649564  |
| C | -0.620759 | -0.765857 | -0.212175 |
| C | -1.083362 | 0.602972  | 0.371069  |
| C | -0.288368 | 0.705117  | 1.635437  |
| O | 0.564962  | -0.188293 | 1.807916  |
| O | -0.695551 | 1.704240  | -0.415545 |
| C | 1.954062  | -1.086979 | 0.039763  |
| O | -1.602235 | -1.764677 | -0.059405 |
| O | 2.090098  | 0.201106  | -0.507039 |
| C | 3.375171  | 0.444546  | -1.071097 |
| C | -2.626685 | -1.734267 | -1.055440 |
| C | -1.629600 | 2.795892  | -0.447460 |
| H | 0.407304  | -2.154969 | 1.124505  |
| H | -0.328558 | -0.623244 | -1.259509 |
| H | -2.159527 | 0.585462  | 0.594384  |
| H | -0.331370 | 1.510463  | 2.378081  |
| H | 2.712846  | -1.287386 | 0.809944  |
| H | 2.029550  | -1.876114 | -0.725664 |
| H | 3.361426  | 1.464208  | -1.453506 |
| H | 4.162227  | 0.350195  | -0.312852 |
| H | 3.583411  | -0.249640 | -1.894478 |
| H | -3.270677 | -2.590161 | -0.860232 |
| H | -3.226423 | -0.817761 | -0.996022 |
| H | -2.194598 | -1.817966 | -2.059061 |
| H | -1.210407 | 3.524152  | -1.139138 |
| H | -2.604874 | 2.454454  | -0.810311 |
| H | -1.744600 | 3.257108  | 0.538486  |

|   |           |           |           |
|---|-----------|-----------|-----------|
| H | 0.083489  | -2.353816 | 0.760186  |
| H | -0.503370 | -0.533212 | -1.374231 |
| H | -2.009986 | 0.946945  | 0.498848  |
| H | -0.293669 | 1.162813  | 2.563098  |
| H | 2.459899  | -1.715393 | 0.666944  |
| H | 1.788993  | -1.976264 | -0.960115 |
| H | 3.532379  | 1.226560  | -1.171334 |
| H | 4.159431  | -0.151598 | -0.227636 |
| H | 3.522494  | -0.411261 | -1.877760 |
| H | -3.739074 | -1.940085 | -0.885422 |
| H | -3.352124 | -0.210854 | -1.029770 |
| H | -2.569187 | -1.392746 | -2.119105 |
| H | -0.295745 | 3.698838  | -0.867676 |
| H | -1.879421 | 2.872557  | -0.912813 |
| H | -1.196954 | 3.431378  | 0.645531  |

**E<sub>3</sub> conformation (2.2 kcal / mol)** $E_{\text{gas}}(\text{B3LYP}) = -614.603563697$  a.u. $E_{\text{solv}}(\text{B3LYP}) = -614.671733582$  a.u.

Zero-point energy correction = 0.229791 a.u.

## Atom coordinates

|   |           |           |           |
|---|-----------|-----------|-----------|
| C | 0.365811  | -1.342467 | 0.457969  |
| C | -0.767594 | -0.665852 | -0.317067 |
| C | -0.943782 | 0.723161  | 0.365583  |
| C | -0.296163 | 0.487420  | 1.699838  |
| O | 0.380457  | -0.558234 | 1.782945  |
| O | -0.235110 | 1.779432  | -0.227486 |
| C | 1.770139  | -1.305203 | -0.085674 |
| O | -1.916841 | -1.461765 | -0.139199 |
| O | 2.088821  | 0.018268  | -0.423365 |
| C | 3.401327  | 0.167529  | -0.953740 |
| C | -2.945874 | -1.226914 | -1.103690 |
| C | -0.958156 | 3.016414  | -0.338538 |

4-CO<sub>2</sub>Me-d-arabinose oxocarbenium ion (87)

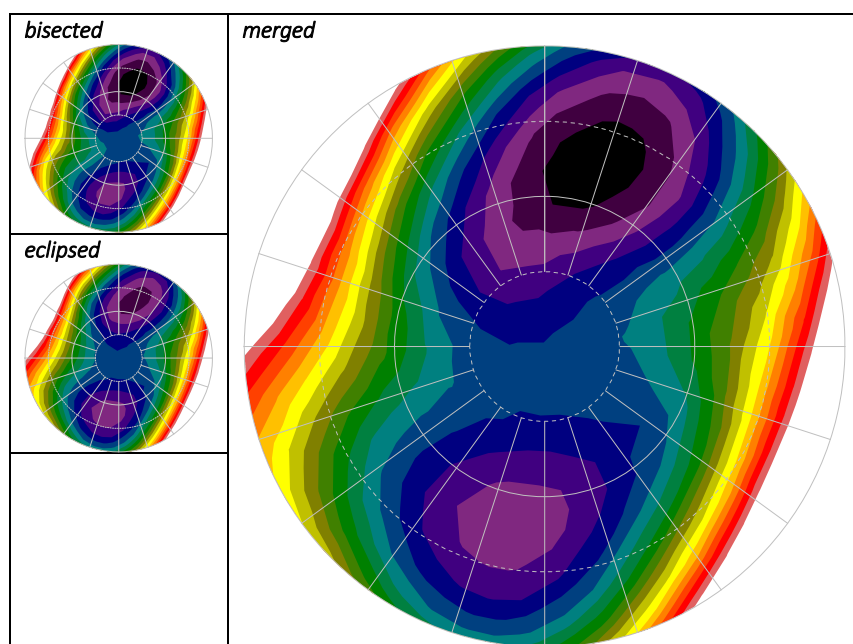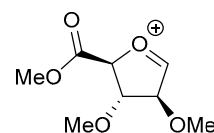

Local minima

<sup>3</sup>E conformation (0.0 kcal / mol)

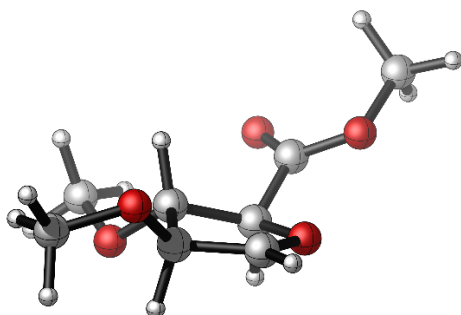

D1 = 20°      P = 18.0°  
D3 = 0°      τ<sub>m</sub> = 21.0

E<sub>gas</sub>(B3LYP) = -688.651725363 a.u.

E<sub>soln</sub>(B3LYP) = -688.726623078 a.u.

Zero-point energy correction = 0.210926 a.u.

Atom coordinates

|   |           |           |           |
|---|-----------|-----------|-----------|
| C | -0.688150 | 0.438614  | -0.010363 |
| C | -1.674119 | -0.738530 | -0.241807 |
| C | -0.780001 | -1.870116 | -0.573071 |
| O | 0.402151  | -1.551252 | -0.839895 |
| C | 0.594005  | -0.060659 | -0.747500 |
| C | 1.923872  | 0.245114  | -0.076333 |
| O | 2.645024  | -0.832209 | 0.173853  |
| C | 3.939655  | -0.610835 | 0.800754  |
| O | 2.219176  | 1.387075  | 0.168994  |
| O | -1.245037 | 1.595739  | -0.554209 |
| O | -2.536525 | -1.062232 | 0.793862  |
| C | -0.727491 | 2.837999  | -0.047802 |
| C | -3.800682 | -0.371614 | 0.764479  |
| H | -0.493821 | 0.537701  | 1.068200  |
| H | -2.203974 | -0.525242 | -1.201329 |
| H | -1.042424 | -2.934105 | -0.606477 |
| H | 0.611756  | 0.293278  | -1.785439 |
| H | 4.561560  | 0.004457  | 0.151004  |
| H | 3.802718  | -0.120711 | 1.764389  |
| H | 4.365625  | -1.602424 | 0.923727  |
| H | -1.344797 | 3.617225  | -0.491022 |
| H | -0.816926 | 2.872931  | 1.043226  |
| H | 0.317405  | 2.977142  | -0.331395 |
| H | -4.353985 | -0.729793 | 1.630037  |
| H | -3.656380 | 0.708834  | 0.835679  |
| H | -4.347599 | -0.616101 | -0.151586 |

$E_3$  conformation (1.2 kcal / mol)

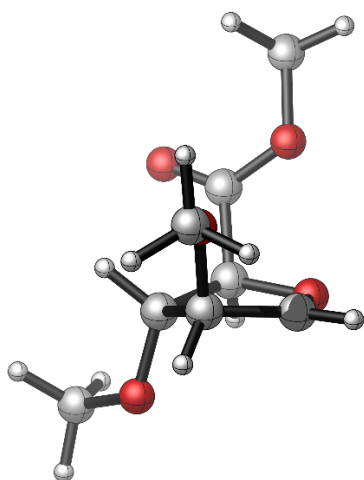

D1 = -20°      P = 198.2°  
D3 = 0°         $\tau_m$  = 21.0

$E_{\text{gas}}(\text{B3LYP}) = -688.654490261$  a.u.  
 $E_{\text{soln}}(\text{B3LYP}) = -688.726938637$  a.u.  
Zero-point energy correction = 0.211547 a.u.

Atom coordinates

|   |           |           |           |
|---|-----------|-----------|-----------|
| C | -1.077442 | -0.508004 | -0.259524 |
| C | -1.345046 | 0.955287  | 0.140411  |
| C | -0.650176 | 1.074763  | 1.457211  |
| O | 0.130412  | 0.128378  | 1.718768  |
| C | 0.148886  | -0.886173 | 0.606909  |
| C | 1.487873  | -0.835473 | -0.123131 |
| O | 2.315199  | 0.076898  | 0.354427  |
| C | 3.611092  | 0.179225  | -0.299587 |
| O | 1.684689  | -1.588545 | -1.040947 |
| O | -2.215617 | -1.241195 | 0.108903  |
| O | -0.552789 | 1.840285  | -0.637164 |
| C | -2.305734 | -2.532658 | -0.504722 |
| C | -1.169106 | 3.103081  | -0.962152 |
| H | -0.849922 | -0.579983 | -1.330393 |
| H | -2.415456 | 1.189036  | 0.154536  |
| H | -0.678679 | 1.916590  | 2.157819  |
| H | 0.050266  | -1.852009 | 1.108327  |
| H | 4.140046  | -0.769742 | -0.216366 |
| H | 3.473048  | 0.442647  | -1.347955 |
| H | 4.134913  | 0.966408  | 0.235060  |
| H | -3.238081 | -2.972116 | -0.155071 |
| H | -2.325247 | -2.438752 | -1.595808 |
| H | -1.470452 | -3.178792 | -0.211038 |
| H | -0.444966 | 3.631561  | -1.578785 |
| H | -2.092389 | 2.931556  | -1.522781 |
| H | -1.380321 | 3.686729  | -0.061922 |

${}^3T_4$  conformation (0.9 kcal / mol)

$E_{\text{gas}}(\text{B3LYP}) = -688.654180078$  a.u.  
 $E_{\text{soln}}(\text{B3LYP}) = -688.726491044$  a.u.  
Zero-point energy correction = 0.211589 a.u.

Atom coordinates

|   |           |           |           |
|---|-----------|-----------|-----------|
| C | -1.001965 | -0.607168 | -0.250505 |
| C | -1.479110 | 0.809119  | 0.119735  |
| C | -0.844906 | 1.035891  | 1.454479  |
| O | 0.130251  | 0.281808  | 1.687651  |
| C | 0.241316  | -0.808000 | 0.655036  |
| C | 1.579427  | -0.706023 | -0.066725 |
| O | 2.291934  | 0.346938  | 0.292837  |
| C | 3.579124  | 0.511230  | -0.364089 |
| O | 1.875715  | -1.541706 | -0.881239 |
| O | -2.040454 | -1.486738 | 0.091154  |
| O | -0.775619 | 1.794037  | -0.619007 |
| C | -1.934440 | -2.780469 | -0.515263 |
| C | -1.547017 | 2.949582  | -1.009520 |
| H | -0.736261 | -0.656625 | -1.314108 |
| H | -2.569381 | 0.900259  | 0.084645  |
| H | -1.030000 | 1.856211  | 2.156885  |
| H | 0.213746  | -1.735301 | 1.232222  |
| H | 4.218132  | -0.342488 | -0.139612 |
| H | 3.434136  | 0.599319  | -1.440548 |
| H | 3.992133  | 1.426549  | 0.050168  |
| H | -2.813954 | -3.338646 | -0.199618 |
| H | -1.921934 | -2.693238 | -1.607066 |
| H | -1.033321 | -3.309141 | -0.183693 |
| H | -0.864213 | 3.576203  | -1.579524 |
| H | -2.389290 | 2.638261  | -1.633425 |
| H | -1.908989 | 3.498967  | -0.136388 |

2-N<sub>3</sub>-D-arabinose oxocarbenium ion (88)

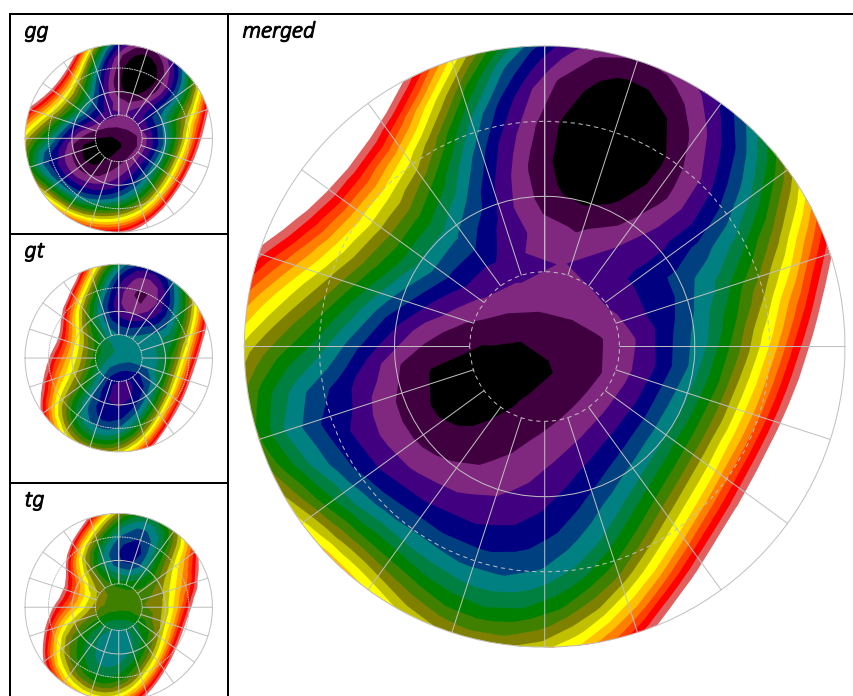

Local minima

<sup>3</sup>E conformation (0.0 kcal / mol)

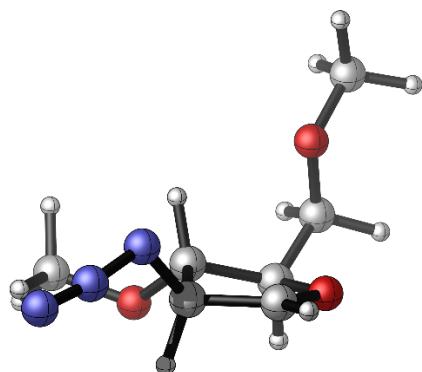

D1 = 20°      P = 18.3°  
D3 = 0°      τ<sub>m</sub> = 21.1

E<sub>gas</sub>(B3LYP) = -663.669685310 a.u.

E<sub>solv</sub>(B3LYP) = -663.745302055 a.u.

Zero-point energy correction = 0.200297 a.u.

Atom coordinates

|   |           |           |           |
|---|-----------|-----------|-----------|
| C | -0.023596 | 0.635430  | -0.222194 |
| C | -1.148999 | -0.427157 | -0.425990 |
| C | -0.378434 | -1.613715 | -0.887977 |
| O | 0.801246  | -1.382595 | -1.224167 |
| C | 1.143256  | 0.095017  | -1.065990 |
| C | 2.520063  | 0.166209  | -0.463430 |
| O | -0.327179 | 1.912532  | -0.700030 |
| O | 2.460995  | -0.393205 | 0.827250  |
| C | 3.714111  | -0.369872 | 1.506612  |
| C | -1.075901 | 2.730850  | 0.207007  |
| N | -1.903953 | -0.729126 | 0.788208  |
| N | -3.139955 | -0.725846 | 0.685805  |
| N | -4.265555 | -0.742338 | 0.746139  |
| H | 0.247777  | 0.646543  | 0.839776  |
| H | -1.789751 | -0.119836 | -1.277798 |
| H | -0.736138 | -2.649750 | -0.940716 |
| H | 1.115924  | 0.496641  | -2.084254 |
| H | 3.233147  | -0.368486 | -1.106935 |
| H | 2.810873  | 1.229061  | -0.444216 |
| H | 3.552063  | -0.826382 | 2.482127  |
| H | 4.469879  | -0.944336 | 0.957396  |
| H | 4.070652  | 0.658721  | 1.640734  |
| H | -1.104738 | 3.725669  | -0.234127 |
| H | -2.100356 | 2.363169  | 0.328434  |
| H | -0.586588 | 2.775731  | 1.185874  |



**Flat-<sup>4</sup>E conformation (0.3 kcal / mol)**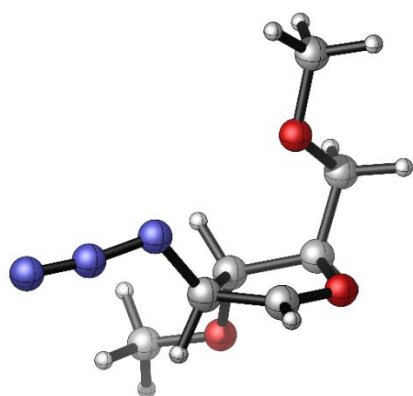

D1 = -10°      P = 232.8°  
 D3 = 10°      τ<sub>m</sub> = 16.5

E<sub>gas</sub>(B3LYP) = -663.670483626 a.u.  
 E<sub>soln</sub>(B3LYP) = -663.744837496 a.u.  
 Zero-point energy correction = 0.200374 a.u.

## Atom coordinates

|   |           |           |           |
|---|-----------|-----------|-----------|
| C | 0.206076  | 0.991091  | -0.283747 |
| C | 0.888475  | -0.109913 | 0.600312  |
| C | -0.033409 | -0.207179 | 1.769322  |
| O | -1.025545 | 0.546674  | 1.736869  |
| C | -1.165752 | 1.212869  | 0.365142  |
| C | -2.342577 | 0.527286  | -0.281992 |
| O | 0.898037  | 2.212695  | -0.230006 |
| O | -1.976937 | -0.817039 | -0.475464 |
| C | -2.997937 | -1.615042 | -1.070511 |
| C | 2.031071  | 2.280938  | -1.100260 |
| N | 1.045206  | -1.427596 | -0.017747 |
| N | 2.208108  | -1.850180 | -0.102570 |
| N | 3.201689  | -2.360087 | -0.261545 |
| H | 0.099171  | 0.619387  | -1.308953 |
| H | 1.839185  | 0.279137  | 1.006448  |
| H | 0.101371  | -0.845211 | 2.650865  |
| H | -1.352943 | 2.266072  | 0.584190  |
| H | -3.231549 | 0.625413  | 0.357151  |
| H | -2.543125 | 1.046666  | -1.232438 |
| H | -2.595664 | -2.623197 | -1.156548 |
| H | -3.897235 | -1.632210 | -0.443471 |
| H | -3.257599 | -1.239434 | -2.067152 |
| H | 2.417580  | 3.295594  | -1.022011 |
| H | 2.818394  | 1.578251  | -0.800187 |
| H | 1.737285  | 2.075640  | -2.135653 |

**Flat conformation (0.4 kcal / mol)**

E<sub>gas</sub>(B3LYP) = -663.670577856 a.u.  
 E<sub>soln</sub>(B3LYP) = -663.744990888 a.u.  
 Zero-point energy correction = 0.200428 a.u.

## Atom coordinates

|   |           |           |           |
|---|-----------|-----------|-----------|
| C | 0.049595  | 0.970242  | -0.105382 |
| C | 1.083862  | -0.018772 | 0.520944  |
| C | 0.330643  | -0.616688 | 1.661708  |
| O | -0.836941 | -0.207738 | 1.811787  |
| C | -1.214376 | 0.831315  | 0.761671  |
| C | -2.448429 | 0.298053  | 0.080740  |
| O | 0.453059  | 2.312192  | -0.029928 |
| O | -2.080458 | -0.884384 | -0.588979 |
| C | -3.163974 | -1.509183 | -1.273127 |
| C | 1.380670  | 2.702551  | -1.046821 |
| N | 1.439726  | -1.115172 | -0.392838 |
| N | 2.621432  | -1.495843 | -0.364480 |
| N | 3.653524  | -1.938054 | -0.464617 |
| H | -0.150032 | 0.656075  | -1.134930 |
| H | 1.959386  | 0.521486  | 0.917157  |
| H | 0.693333  | -1.393683 | 2.345740  |
| H | -1.409095 | 1.741348  | 1.335259  |
| H | -3.236184 | 0.117933  | 0.825782  |
| H | -2.804610 | 1.077356  | -0.612006 |
| H | -2.763055 | -2.406772 | -1.741797 |
| H | -3.961070 | -1.787954 | -0.573496 |
| H | -3.575854 | -0.848036 | -2.045100 |
| H | 1.532901  | 3.773855  | -0.927544 |
| H | 2.343880  | 2.190790  | -0.933835 |
| H | 0.974401  | 2.495418  | -2.043125 |

**Flat-<sup>E</sup><sub>3</sub> conformation (0.9 kcal / mol)**

E<sub>gas</sub>(B3LYP) = -663.670961102 a.u.  
 E<sub>soln</sub>(B3LYP) = -663.745204890 a.u.  
 Zero-point energy correction = 0.200530 a.u.

|   |           |           |           |
|---|-----------|-----------|-----------|
| C | 0.148935  | 1.027398  | -0.236751 |
| C | 1.037144  | -0.024885 | 0.501769  |
| C | 0.262048  | -0.289864 | 1.751384  |
| O | -0.861717 | 0.245896  | 1.811121  |
| C | -1.168029 | 1.060419  | 0.554316  |
| C | -2.376203 | 0.414421  | -0.073439 |
| O | 0.699835  | 2.318977  | -0.166813 |
| O | -1.998085 | -0.871888 | -0.497437 |
| C | -3.054842 | -1.601739 | -1.114818 |
| C | 1.711254  | 2.578320  | -1.144819 |
| N | 1.148856  | -1.310541 | -0.203616 |
| N | 2.278982  | -1.824418 | -0.223114 |
| N | 3.238386  | -2.405069 | -0.339141 |
| H | -0.017795 | 0.701651  | -1.269586 |
| H | 2.015002  | 0.401747  | 0.770388  |
| H | 0.567805  | -0.935578 | 2.583292  |
| H | -1.382059 | 2.063895  | 0.930478  |
| H | -3.198113 | 0.381353  | 0.656120  |
| H | -2.691332 | 1.055404  | -0.912395 |
| H | -2.643375 | -2.569484 | -1.397917 |
| H | -3.889261 | -1.749751 | -0.418622 |
| H | -3.419444 | -1.084905 | -2.010774 |
| H | 1.990350  | 3.623931  | -1.026888 |
| H | 2.598651  | 1.953212  | -0.987941 |

2-F-D-arabinose oxocarbenium ion (89)

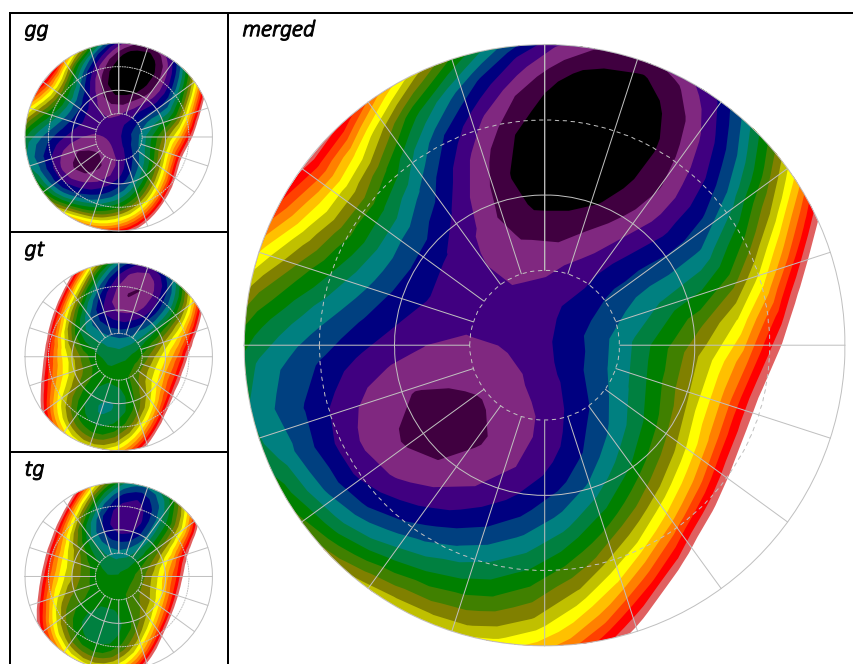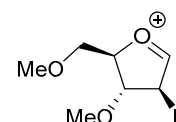

Local minima

${}^3E$  conformation (0.0 kcal / mol)

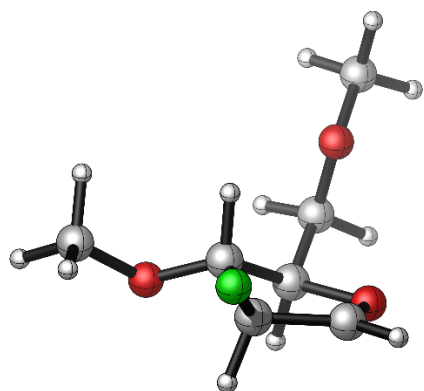

D1 = 30°  
D3 = 0°

P = 18.0°  
 $\tau_m$  = 31.5

$E_{\text{gas}}(\text{B3LYP}) = -599.303899915$  a.u.

$E_{\text{soln}}(\text{B3LYP}) = -599.380563768$  a.u.

Zero-point energy correction = 0.189574 a.u.

Atom coordinates

|   |           |           |           |
|---|-----------|-----------|-----------|
| C | -0.661357 | 0.350470  | -0.077910 |
| C | -1.648658 | -0.833110 | 0.058478  |
| C | -0.738940 | -2.004620 | -0.059544 |
| O | 0.355283  | -1.742062 | -0.599731 |
| C | 0.425255  | -0.260300 | -0.983257 |
| C | 1.841892  | 0.196422  | -0.780980 |
| O | -1.164802 | 1.476571  | -0.723054 |
| O | 2.145414  | 0.102886  | 0.589445  |
| C | 3.465405  | 0.544377  | 0.900516  |
| C | -1.923227 | 2.355351  | 0.121342  |
| F | -2.371214 | -0.867232 | 1.225915  |
| H | -0.251077 | 0.578336  | 0.915758  |
| H | -2.340245 | -0.849765 | -0.806906 |
| H | -0.922583 | -3.030056 | 0.286745  |
| H | 0.125887  | -0.229392 | -2.036638 |
| H | 2.517320  | -0.418507 | -1.393194 |
| H | 1.898841  | 1.232923  | -1.151305 |
| H | 3.589705  | 0.429964  | 1.976434  |
| H | 4.215789  | -0.063492 | 0.380876  |
| H | 3.602293  | 1.597757  | 0.627606  |
| H | -2.172943 | 3.220844  | -0.489353 |
| H | -2.843885 | 1.874673  | 0.467153  |
| H | -1.327546 | 2.671099  | 0.984436  |

**Flat-<sup>4</sup>E conformation (0.6 kcal / mol)**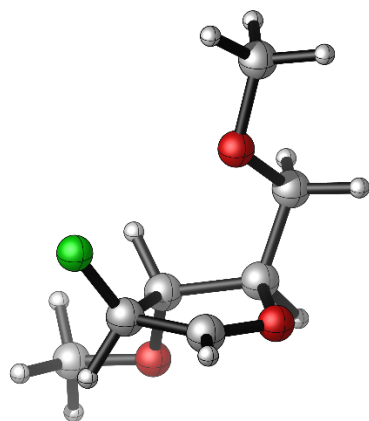

D1 = -10°      P = 232.8°  
 D3 = 10°      τ<sub>m</sub> = 16.5

E<sub>gas</sub>(B3LYP) = -599.305030720 a.u.  
 E<sub>solv</sub>(B3LYP) = -599.379865593 a.u.  
 Zero-point energy correction = 0.189772 a.u.

## Atom coordinates

|   |           |           |           |
|---|-----------|-----------|-----------|
| C | -0.886163 | -0.367565 | -0.153666 |
| C | -0.841882 | 1.183372  | -0.086054 |
| C | -0.026052 | 1.449915  | 1.146963  |
| O | 0.372239  | 0.433254  | 1.740755  |
| C | 0.121987  | -0.832083 | 0.903204  |
| C | 1.488114  | -1.215030 | 0.390033  |
| O | -2.146561 | -0.866529 | 0.218445  |
| O | 1.903608  | -0.169470 | -0.456276 |
| C | 3.204353  | -0.353683 | -1.013185 |
| C | -3.111252 | -0.852529 | -0.839214 |
| F | -0.253000 | 1.803245  | -1.165770 |
| H | -0.580791 | -0.693291 | -1.157147 |
| H | -1.846803 | 1.605768  | 0.066702  |
| H | 0.218713  | 2.431671  | 1.572149  |
| H | -0.301070 | -1.552978 | 1.605455  |
| H | 2.180677  | -1.369497 | 1.229033  |
| H | 1.379303  | -2.168755 | -0.149859 |
| H | 3.403502  | 0.518739  | -1.633573 |
| H | 3.961833  | -0.422579 | -0.223802 |
| H | 3.240188  | -1.257607 | -1.631989 |
| H | -4.018246 | -1.295492 | -0.431687 |
| H | -3.330624 | 0.168118  | -1.175075 |
| H | -2.758599 | -1.445729 | -1.690154 |

**Flat-<sup>4</sup>T<sub>3</sub> conformation (1.1 kcal / mol)**

E<sub>gas</sub>(B3LYP) = -599.304860928 a.u.  
 E<sub>solv</sub>(B3LYP) = -599.379368612 a.u.  
 Zero-point energy correction = 0.189835 a.u.

## Atom coordinates

|   |           |           |           |
|---|-----------|-----------|-----------|
| C | -0.921301 | -0.301453 | -0.280061 |
| C | -0.719928 | 1.126587  | 0.303615  |
| C | 0.160436  | 0.883460  | 1.494511  |
| O | 0.366645  | -0.320695 | 1.746712  |
| C | 0.076119  | -1.165146 | 0.496630  |
| C | 1.438243  | -1.315457 | -0.138813 |
| O | -2.209513 | -0.796642 | -0.017131 |
| O | 1.845385  | -0.014074 | -0.493982 |
| C | 3.190463  | 0.081362  | -0.966551 |
| C | -3.206205 | -0.332572 | -0.933774 |
| F | -0.176589 | 2.054823  | -0.548803 |
| H | -0.683217 | -0.291566 | -1.352677 |
| H | -1.671741 | 1.521124  | 0.698666  |
| H | 0.538064  | 1.637645  | 2.196164  |
| H | -0.351455 | -2.099520 | 0.862576  |
| H | 2.135961  | -1.790707 | 0.563990  |
| H | 1.327020  | -1.967523 | -1.018322 |
| H | 3.366990  | 1.132729  | -1.187201 |
| H | 3.897538  | -0.259507 | -0.202095 |
| H | 3.322334  | -0.510905 | -1.878372 |
| H | -4.137646 | -0.815265 | -0.643231 |
| H | -3.334436 | 0.755231  | -0.878033 |
| H | -2.947206 | -0.614543 | -1.960378 |

**Flat-<sup>4</sup>T<sub>3</sub> conformation (1.2 kcal / mol)**

E<sub>gas</sub>(B3LYP) = -599.304258277 a.u.  
 E<sub>solv</sub>(B3LYP) = -599.378943699 a.u.  
 Zero-point energy correction = 0.189846 a.u.

## Atom coordinates

|   |           |           |           |
|---|-----------|-----------|-----------|
| C | -0.870313 | -0.382142 | -0.105445 |
| C | -0.959718 | 1.157553  | -0.262248 |
| C | -0.185524 | 1.668926  | 0.921799  |
| O | 0.392937  | 0.794189  | 1.585669  |
| C | 0.160214  | -0.611280 | 1.009768  |
| C | 1.526572  | -1.088798 | 0.588196  |
| O | -2.087668 | -0.924202 | 0.345121  |
| O | 1.953505  | -0.241821 | -0.451731 |
| C | 3.265895  | -0.535959 | -0.927133 |
| C | -3.053898 | -1.136327 | -0.689740 |
| F | -0.337658 | 1.655661  | -1.391373 |
| H | -0.534737 | -0.820493 | -1.053935 |
| H | -1.995645 | 1.518846  | -0.230225 |
| H | -0.048997 | 2.718490  | 1.212470  |
| H | -0.256789 | -1.179104 | 1.844931  |
| H | 2.212180  | -1.064023 | 1.446971  |
| H | 1.424093  | -2.135832 | 0.261406  |
| H | 3.481761  | 0.184883  | -1.714279 |
| H | 4.005265  | -0.432865 | -0.124092 |
| H | 3.316479  | -1.551050 | -1.338335 |
| H | -3.917756 | -1.593861 | -0.210897 |
| H | -3.361209 | -0.193862 | -1.158351 |
| H | -2.655285 | -1.809253 | -1.456954 |

D-lyxose oxocarbenium ion (90)

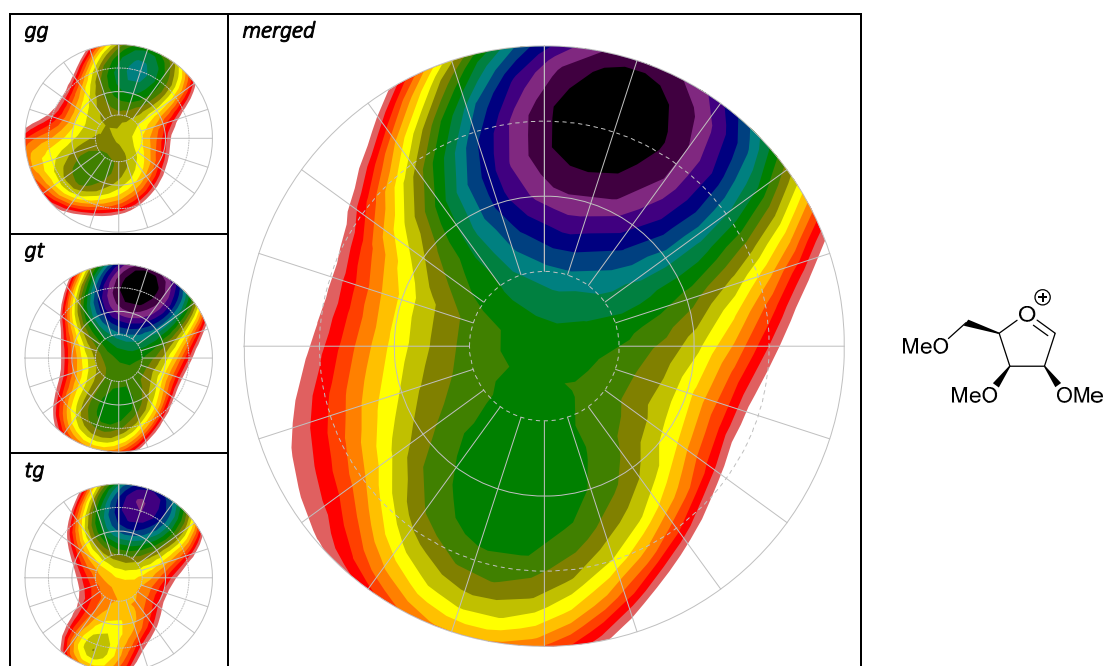

Local minima

$^3E$  conformation (0.0 kcal / mol)

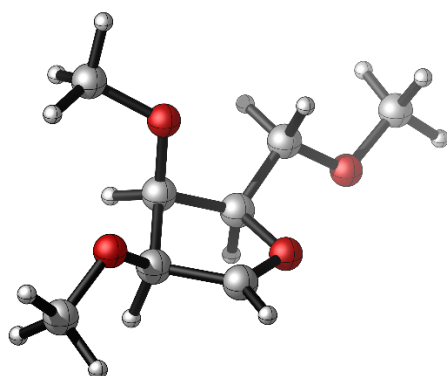

D1 = 30°      P = 18.5°  
D3 = 0°       $\tau_m$  = 31.6

$E_{\text{gas}}(\text{B3LYP}) = -614.601741093$  a.u.

$E_{\text{solv}}(\text{B3LYP}) = -614.675167100$  a.u.

Zero-point energy correction = 0.229442 a.u.

Atom coordinates

|   |           |           |           |
|---|-----------|-----------|-----------|
| C | -0.839987 | -0.331030 | 0.564493  |
| C | 0.453449  | 0.483932  | 0.602649  |
| C | 1.528020  | -0.627922 | 0.328328  |
| C | 0.749548  | -1.579046 | -0.518496 |
| O | -0.490711 | -1.460949 | -0.427783 |
| C | -2.083633 | 0.347977  | 0.061088  |
| O | 0.416725  | 1.447718  | -0.406428 |
| O | 2.678371  | -0.162884 | -0.296344 |
| O | -3.168240 | -0.524842 | 0.275786  |
| C | -4.400908 | 0.004574  | -0.203414 |
| C | 1.252849  | 2.594903  | -0.194923 |
| C | 3.906876  | -0.762649 | 0.147737  |
| H | -1.026159 | -0.868128 | 1.499847  |
| H | 0.598849  | 0.918625  | 1.600192  |
| H | 1.719455  | -1.151800 | 1.288136  |
| H | 1.144036  | -2.333023 | -1.210284 |
| H | -2.195246 | 1.286892  | 0.626764  |
| H | -1.968571 | 0.612336  | -0.998217 |
| H | -5.166967 | -0.740995 | 0.006285  |
| H | -4.655780 | 0.940650  | 0.309477  |
| H | -4.359161 | 0.188205  | -1.284277 |
| H | 1.022249  | 3.287273  | -1.002974 |
| H | 1.019900  | 3.065845  | 0.766606  |
| H | 2.308089  | 2.320349  | -0.232874 |
| H | 4.702642  | -0.250348 | -0.389255 |
| H | 4.035096  | -0.622277 | 1.226163  |
| H | 3.935129  | -1.830375 | -0.092210 |

### $E_3$ conformation (4.2 kcal / mol)

$E_{\text{gas}}(\text{B3LYP}) = -614.596154162$  a.u.

$E_{\text{solv}}(\text{B3LYP}) = -614.668959666$  a.u.

Zero-point energy correction = 0.230126 a.u.

#### Atom coordinates

|   |           |           |           |
|---|-----------|-----------|-----------|
| C | 0.801932  | 0.177142  | -0.939456 |
| C | -0.644015 | 0.703655  | -0.860105 |
| C | -1.493563 | -0.563421 | -0.516557 |
| C | -0.576620 | -1.667376 | -0.934899 |
| O | 0.604421  | -1.318346 | -1.158180 |
| C | 1.662579  | 0.349342  | 0.290480  |
| O | -0.710789 | 1.729257  | 0.080568  |
| O | -1.569276 | -0.765052 | 0.882676  |
| O | 2.946539  | -0.146638 | -0.013798 |
| C | 3.869741  | 0.034302  | 1.055311  |
| C | -1.930043 | 2.474103  | 0.055660  |
| C | -2.787192 | -1.369058 | 1.357548  |
| H | 1.341516  | 0.488044  | -1.835973 |
| H | -0.953062 | 1.045552  | -1.859804 |
| H | -2.469673 | -0.592034 | -1.014711 |
| H | -0.801974 | -2.739069 | -0.979237 |
| H | 1.677800  | 1.424890  | 0.514680  |
| H | 1.219313  | -0.166917 | 1.153702  |
| H | 4.822432  | -0.376334 | 0.722769  |
| H | 3.995875  | 1.098059  | 1.293500  |
| H | 3.541460  | -0.497353 | 1.957397  |
| H | -1.806661 | 3.286684  | 0.769468  |
| H | -2.114037 | 2.887357  | -0.942654 |
| H | -2.782661 | 1.857747  | 0.359669  |
| H | -2.702673 | -1.387518 | 2.442380  |
| H | -3.649072 | -0.764889 | 1.057941  |
| H | -2.902669 | -2.390131 | 0.982849  |

4-CO<sub>2</sub>Me-D-lyxose oxocarbenium ion (91)

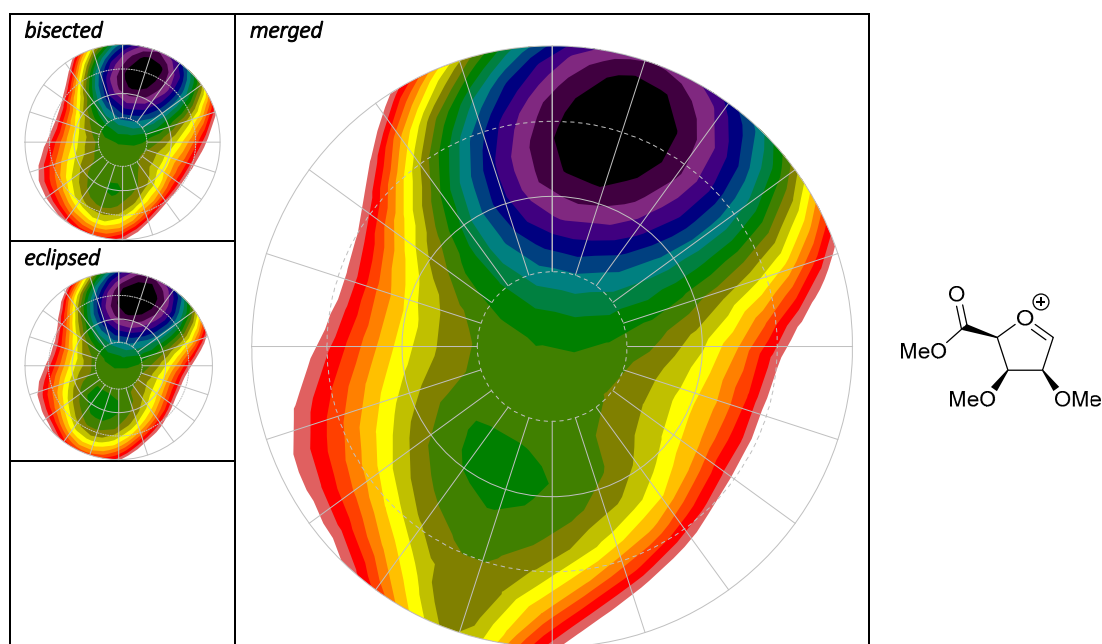

Local minima

<sup>3</sup>E conformation (0.0 kcal / mol)

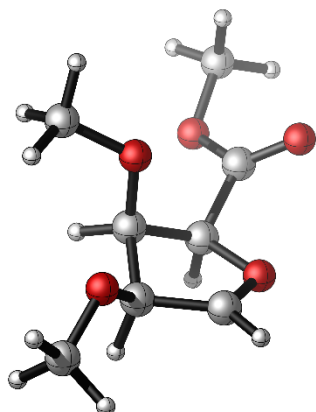

D1 = 30°      P = 18.0°  
D3 = 0°      τ<sub>m</sub> = 31.5

E<sub>gas</sub>(B3LYP) = -688.652417408 a.u.

E<sub>solv</sub>(B3LYP) = -688.729998238 a.u.

Zero-point energy correction = 0.211213 a.u.

Atom coordinates

|   |           |           |           |
|---|-----------|-----------|-----------|
| C | 0.400033  | 0.359248  | 0.550907  |
| C | 1.760943  | -0.411169 | 0.407603  |
| C | 1.321062  | -1.628120 | -0.331734 |
| O | 0.092787  | -1.867015 | -0.251260 |
| C | -0.583248 | -0.818565 | 0.594135  |
| C | -1.944051 | -0.556675 | -0.038943 |
| O | -2.615180 | 0.277810  | 0.743377  |
| C | -3.929296 | 0.685428  | 0.275685  |
| O | -2.314645 | -1.041869 | -1.071712 |
| O | 0.114189  | 1.130500  | -0.573870 |
| O | 2.750826  | 0.306632  | -0.246160 |
| C | 0.517500  | 2.506888  | -0.498874 |
| C | 4.081001  | 0.143120  | 0.276371  |
| H | 0.367123  | 0.930358  | 1.486680  |
| H | 2.050837  | -0.760777 | 1.422213  |
| H | 1.929249  | -2.307376 | -0.941150 |
| H | -0.674287 | -1.261715 | 1.592084  |
| H | -3.837976 | 1.187578  | -0.687291 |
| H | -4.575290 | -0.187459 | 0.183554  |
| H | -4.302083 | 1.366337  | 1.035648  |
| H | 0.145732  | 2.976939  | -1.407615 |
| H | 0.066418  | 2.989458  | 0.374744  |
| H | 1.604728  | 2.590645  | -0.457619 |
| H | 4.712537  | 0.819703  | -0.295615 |
| H | 4.112267  | 0.411482  | 1.337471  |
| H | 4.433273  | -0.884568 | 0.142994  |

**${}^3T_4$  conformation (1.4 kcal / mol)** $E_{\text{gas}}(\text{B3LYP}) = -688.650429648$  a.u. $E_{\text{solv}}(\text{B3LYP}) = -688.728063024$  a.u.

Zero-point energy correction = 0.211393 a.u.

## Atom coordinates

|   |           |           |           |
|---|-----------|-----------|-----------|
| C | 0.392508  | 0.350988  | 0.648346  |
| C | 1.772659  | -0.390758 | 0.474239  |
| C | 1.351299  | -1.703695 | -0.100054 |
| O | 0.114033  | -1.896024 | -0.140519 |
| C | -0.599094 | -0.826639 | 0.635081  |
| C | -1.911863 | -0.556835 | -0.089135 |
| O | -2.651236 | 0.247014  | 0.662537  |
| C | -3.925183 | 0.663199  | 0.101609  |
| O | -2.196444 | -1.016909 | -1.160276 |
| O | 0.097195  | 1.177338  | -0.435600 |
| O | 2.653160  | 0.248984  | -0.391311 |
| C | 0.513116  | 2.542326  | -0.294492 |
| C | 4.038691  | 0.208655  | -0.003131 |
| H | 0.351767  | 0.878330  | 1.608771  |
| H | 2.193489  | -0.576814 | 1.481403  |
| H | 1.990261  | -2.450155 | -0.586429 |
| H | -0.762361 | -1.258333 | 1.628125  |
| H | -3.758458 | 1.198967  | -0.832767 |
| H | -4.554394 | -0.209232 | -0.073648 |
| H | -4.365426 | 1.315429  | 0.850586  |
| H | 0.140065  | 3.062614  | -1.174946 |
| H | 0.074836  | 2.985022  | 0.606668  |
| H | 1.602009  | 2.617336  | -0.259407 |
| H | 4.571196  | 0.809300  | -0.737640 |
| H | 4.166655  | 0.636242  | 0.996557  |
| H | 4.423905  | -0.815375 | -0.020696 |

|   |           |           |           |
|---|-----------|-----------|-----------|
| H | -0.746064 | 0.833553  | -2.078727 |
| H | -2.668949 | 0.055782  | -0.913513 |
| H | -1.955042 | -2.548231 | -0.579504 |
| H | 1.171468  | -0.570538 | -2.043575 |
| H | 3.061470  | 0.834416  | 1.783163  |
| H | 3.970766  | -0.597211 | 1.220018  |
| H | 4.331343  | 1.018548  | 0.530806  |
| H | -0.323688 | 3.543076  | 0.212013  |
| H | -0.968513 | 3.106948  | -1.393916 |
| H | -1.829027 | 2.603303  | 0.093305  |
| H | -2.870659 | -0.038167 | 2.627650  |
| H | -3.627537 | 0.681251  | 1.174300  |
| H | -3.577443 | -1.096381 | 1.380503  |

 **$E_3$  conformation (4.4 kcal / mol)** $E_{\text{gas}}(\text{B3LYP}) = -688.648076709$  a.u. $E_{\text{solv}}(\text{B3LYP}) = -688.723410595$  a.u.

Zero-point energy correction = 0.211763 a.u.

## Atom coordinates

|   |           |           |           |
|---|-----------|-----------|-----------|
| C | -0.487938 | 0.536141  | -1.051056 |
| C | -1.715890 | -0.229650 | -0.450538 |
| C | -1.341674 | -1.651204 | -0.722194 |
| O | -0.145123 | -1.827794 | -1.059810 |
| C | 0.615516  | -0.543994 | -1.104770 |
| C | 1.555282  | -0.561352 | 0.105072  |
| O | 2.608958  | 0.195844  | -0.153589 |
| C | 3.557871  | 0.369342  | 0.931483  |
| O | 1.332528  | -1.179380 | 1.111436  |
| O | -0.028849 | 1.604666  | -0.290664 |
| O | -1.734704 | -0.173346 | 0.957496  |
| C | -0.845870 | 2.775782  | -0.356509 |
| C | -3.042397 | -0.159443 | 1.559932  |

2-N<sub>3</sub>-D-lyxose oxocarbenium ion (92)

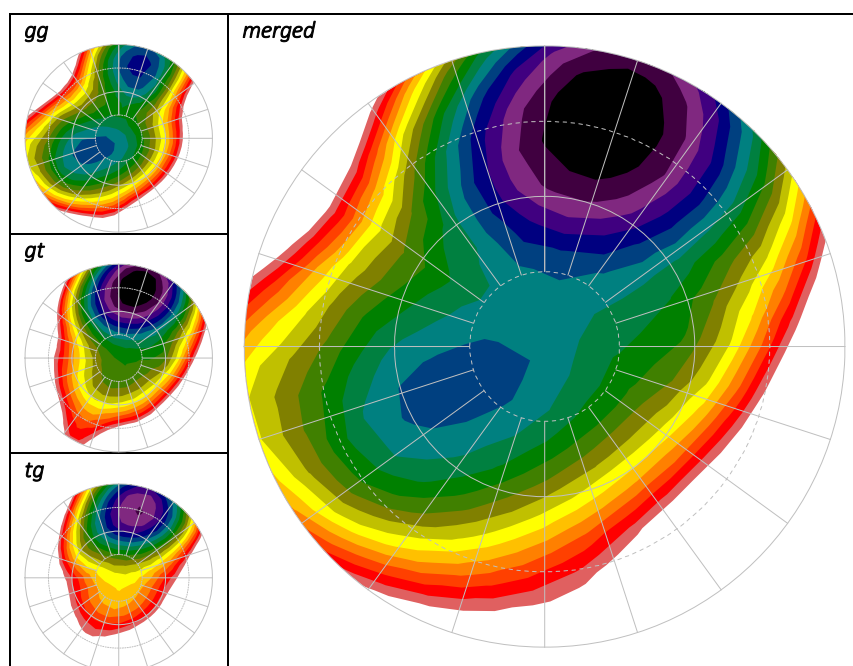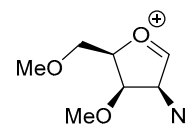

Local minima

<sup>3</sup>E conformation (0.0 kcal / mol)

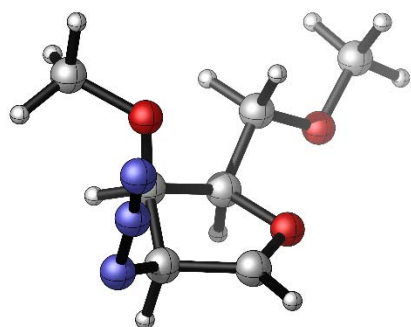

D1 = 30°      P = 18.0°  
D3 = 0°      τ<sub>m</sub> = 31.5

E<sub>gas</sub>(B3LYP) = -663.664855053 a.u.

E<sub>solv</sub>(B3LYP) = -663.745117164 a.u.

Zero-point energy correction = 0.200229 a.u.

Atom coordinates

|   |           |           |           |
|---|-----------|-----------|-----------|
| C | -0.339629 | 0.287244  | -0.904115 |
| C | -1.298786 | -0.949130 | -0.800812 |
| C | -0.558277 | -1.824099 | 0.151728  |
| O | 0.657242  | -1.559463 | 0.253371  |
| C | 1.021240  | -0.372588 | -0.668202 |
| C | 2.084743  | 0.432967  | 0.024907  |
| O | -0.634294 | 1.206913  | 0.107903  |
| O | 3.273382  | -0.321178 | 0.012165  |
| C | 4.348488  | 0.336751  | 0.676958  |
| C | -1.144024 | 2.477900  | -0.330785 |
| N | -2.698936 | -0.711658 | -0.525525 |
| N | -2.988578 | -0.195737 | 0.570252  |
| N | -3.442076 | 0.248346  | 1.501918  |
| H | -0.379894 | 0.724276  | -1.908175 |
| H | -1.260778 | -1.490724 | -1.766888 |
| H | -0.962107 | -2.649867 | 0.751343  |
| H | 1.405194  | -0.868375 | -1.565895 |
| H | 2.195030  | 1.375675  | -0.535937 |
| H | 1.765972  | 0.686225  | 1.044614  |
| H | 5.210148  | -0.326646 | 0.614149  |
| H | 4.589104  | 1.291001  | 0.191615  |
| H | 4.107889  | 0.521087  | 1.731339  |
| H | -1.338545 | 3.052307  | 0.572913  |
| H | -0.404731 | 2.999516  | -0.945907 |
| H | -2.073324 | 2.354419  | -0.895280 |



**<sup>3</sup>T<sub>4</sub> conformation (1.4 kcal / mol)**E<sub>gas</sub>(B3LYP) = -663.663724900 a.u.E<sub>solv</sub>(B3LYP) = -663.743244896 a.u.

Zero-point energy correction = 0.200449 a.u.

## Atom coordinates

|   |           |           |           |
|---|-----------|-----------|-----------|
| C | -0.355770 | 0.320770  | -0.987239 |
| C | -1.353129 | -0.895834 | -0.887347 |
| C | -0.564656 | -1.902273 | -0.118786 |
| O | 0.624199  | -1.591816 | 0.096198  |
| C | 1.001436  | -0.342901 | -0.723297 |
| C | 2.018343  | 0.438093  | 0.062950  |
| O | -0.625317 | 1.272198  | 0.002821  |
| O | 3.224793  | -0.288901 | 0.043066  |
| C | 4.259795  | 0.346004  | 0.788455  |
| C | -1.309106 | 2.452078  | -0.450275 |
| N | -2.683674 | -0.651942 | -0.362399 |
| N | -2.770657 | -0.232882 | 0.809641  |
| N | -3.052102 | 0.134539  | 1.837003  |
| H | -0.372641 | 0.747192  | -1.996379 |
| H | -1.500926 | -1.317518 | -1.897987 |
| H | -0.949487 | -2.822940 | 0.338089  |
| H | 1.437844  | -0.778089 | -1.627675 |
| H | 2.125857  | 1.419635  | -0.425311 |
| H | 1.655839  | 0.612495  | 1.084507  |
| H | 5.139217  | -0.292472 | 0.713808  |
| H | 4.494239  | 1.335726  | 0.376497  |
| H | 3.978256  | 0.454363  | 1.843300  |
| H | -1.436294 | 3.083067  | 0.427384  |
| H | -0.709172 | 2.979087  | -1.198635 |
| H | -2.288585 | 2.203986  | -0.870757 |

|   |           |           |           |
|---|-----------|-----------|-----------|
| H | 2.304942  | -1.224835 | -1.023461 |
| H | 0.236451  | -1.709478 | -2.617959 |
| H | -0.499837 | -2.500626 | 1.167425  |
| H | -2.577077 | -1.320556 | 0.952609  |
| H | -1.529307 | -0.303338 | 1.979482  |
| H | -2.737824 | 2.020024  | -0.526877 |
| H | -3.754627 | 0.811426  | 0.303073  |
| H | -2.581890 | 1.790686  | 1.234310  |
| H | 1.914071  | 1.660121  | 2.480603  |
| H | 2.534504  | -0.010308 | 2.591237  |
| H | 2.844635  | 0.970846  | 1.126241  |

**Flat-E<sub>3</sub> conformation (3.2 kcal / mol)**E<sub>gas</sub>(B3LYP) = -663.665621486 a.u.E<sub>solv</sub>(B3LYP) = -663.741970436 a.u.

Zero-point energy correction = 0.201372 a.u.

## Atom coordinates

|   |           |           |           |
|---|-----------|-----------|-----------|
| C | 0.929958  | -0.885596 | 0.678364  |
| C | 1.343314  | -0.725075 | -0.835727 |
| C | 0.292954  | -1.516660 | -1.539979 |
| O | -0.635547 | -1.945372 | -0.824964 |
| C | -0.469845 | -1.547175 | 0.634947  |
| C | -1.673734 | -0.694804 | 0.963117  |
| O | 0.868153  | 0.319766  | 1.376672  |
| O | -1.748274 | 0.330113  | 0.001353  |
| C | -2.766929 | 1.287380  | 0.278074  |
| C | 2.122867  | 0.750848  | 1.919807  |
| N | 1.506279  | 0.602227  | -1.414921 |
| N | 0.669407  | 1.494602  | -1.179682 |
| N | 0.062106  | 2.438911  | -1.095393 |
| H | 1.635250  | -1.583712 | 1.147173  |

2-F-D-lyxose oxocarbenium ion (93)

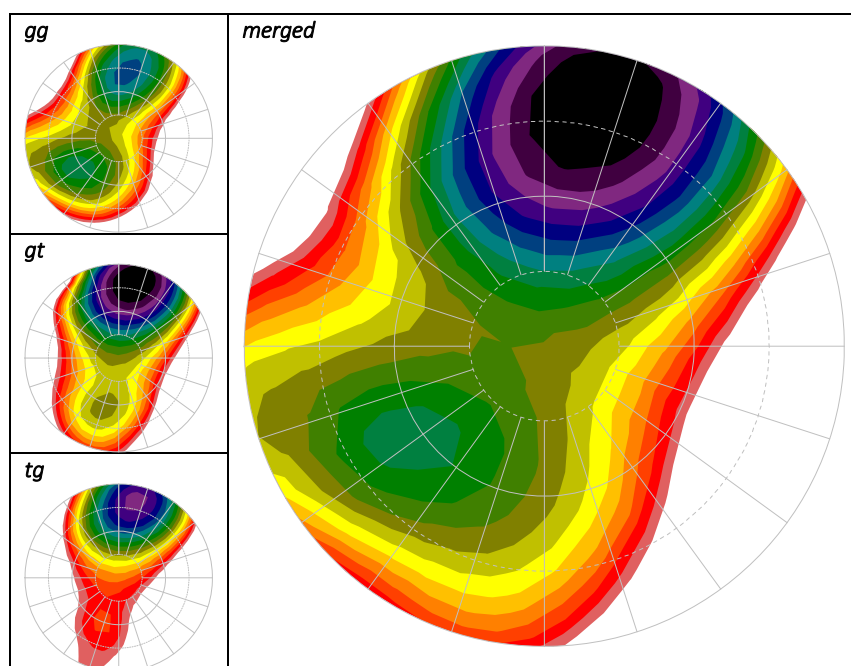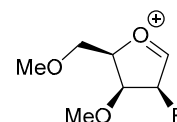

Local minima

<sup>3</sup>E conformation (0.0 kcal / mol)

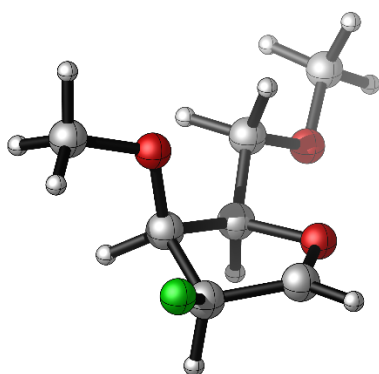

D1 = 30°

P = 18.0°

D3 = 0°

$\tau_m = 31.5$

$E_{\text{gas}}(\text{B3LYP}) = -599.301489062$  a.u.

$E_{\text{sol}}(\text{B3LYP}) = -599.381342125$  a.u.

Zero-point energy correction = 0.189563 a.u.

Atom coordinates

|   |           |           |           |
|---|-----------|-----------|-----------|
| C | 0.867450  | 0.325310  | 0.639593  |
| C | 1.792402  | -0.903875 | 0.400869  |
| C | 0.939121  | -1.786110 | -0.445278 |
| O | -0.276542 | -1.524630 | -0.377249 |
| C | -0.512411 | -0.336932 | 0.589578  |
| C | -1.659258 | 0.471401  | 0.050964  |
| O | 0.972970  | 1.253083  | -0.398925 |
| O | -2.836637 | -0.276131 | 0.243969  |
| C | -3.992763 | 0.377635  | -0.272404 |
| C | 1.938962  | 2.296171  | -0.190982 |
| F | 2.992673  | -0.622809 | -0.191376 |
| H | 1.041572  | 0.766862  | 1.629694  |
| H | 1.961279  | -1.444023 | 1.354178  |
| H | 1.270144  | -2.601588 | -1.101001 |
| H | -0.772714 | -0.837580 | 1.527867  |
| H | -1.678303 | 1.420576  | 0.610743  |
| H | -1.490044 | 0.713187  | -1.006541 |
| H | -4.838708 | -0.281174 | -0.080436 |
| H | -4.160806 | 1.339317  | 0.228575  |
| H | -3.901913 | 0.546857  | -1.352508 |
| H | 1.848766  | 2.962506  | -1.046890 |
| H | 1.714308  | 2.847352  | 0.728361  |
| H | 2.953022  | 1.892818  | -0.146054 |

**${}^3T_4$  conformation (2.1 kcal / mol)** $E_{\text{gas}}(\text{B3LYP}) = -599.297992637$  a.u. $E_{\text{soln}}(\text{B3LYP}) = -599.377924089$  a.u.

Zero-point energy correction = 0.189703 a.u.

## Atom coordinates

|   |           |           |           |
|---|-----------|-----------|-----------|
| C | 0.878818  | 0.322230  | 0.665781  |
| C | 1.826736  | -0.888341 | 0.380491  |
| C | 0.921211  | -1.885382 | -0.273017 |
| O | -0.280307 | -1.564891 | -0.283024 |
| C | -0.510391 | -0.329473 | 0.613499  |
| C | -1.635536 | 0.474479  | 0.023409  |
| O | 0.963855  | 1.287217  | -0.341650 |
| O | -2.825942 | -0.252215 | 0.219564  |
| C | -3.964337 | 0.399560  | -0.336732 |
| C | 1.953667  | 2.303650  | -0.123791 |
| F | 2.882337  | -0.608390 | -0.447758 |
| H | 1.064260  | 0.735596  | 1.665413  |
| H | 2.201904  | -1.322575 | 1.324518  |
| H | 1.228675  | -2.791187 | -0.811294 |
| H | -0.798139 | -0.785694 | 1.565763  |
| H | -1.653749 | 1.442914  | 0.547884  |
| H | -1.443020 | 0.675850  | -1.038432 |
| H | -4.822617 | -0.240420 | -0.135895 |
| H | -4.125985 | 1.380037  | 0.128696  |
| H | -3.854783 | 0.530663  | -1.420425 |
| H | 1.850243  | 3.005430  | -0.949437 |
| H | 1.768624  | 2.821681  | 0.823488  |
| H | 2.961696  | 1.881994  | -0.127421 |

|   |           |           |           |
|---|-----------|-----------|-----------|
| H | -2.344741 | -0.009337 | -1.581629 |
| H | -1.173756 | -1.350779 | -1.445389 |
| H | -2.548098 | -1.430857 | 1.864272  |
| H | -3.463729 | -1.488914 | 0.335231  |
| H | -1.974383 | -2.462235 | 0.527098  |
| H | 2.375245  | -2.767638 | -0.181872 |
| H | 3.182984  | -1.349244 | -0.903027 |
| H | 2.746082  | -1.355141 | 0.834745  |

 **$E_3$  conformation (4.7 kcal / mol)** $E_{\text{gas}}(\text{B3LYP}) = -599.296869616$  a.u. $E_{\text{soln}}(\text{B3LYP}) = -599.374149207$  a.u.

Zero-point energy correction = 0.190376 a.u.

## Atom coordinates

|   |           |           |           |
|---|-----------|-----------|-----------|
| C | 1.060217  | 0.186001  | -0.648366 |
| C | 1.102045  | 1.002463  | 0.677423  |
| C | 0.081627  | 2.077595  | 0.394057  |
| O | -0.634747 | 1.869498  | -0.602329 |
| C | -0.290629 | 0.554208  | -1.295810 |
| C | -1.459964 | -0.370685 | -1.039448 |
| O | 1.139018  | -1.195005 | -0.498111 |
| O | -1.677724 | -0.407894 | 0.348395  |
| C | -2.462142 | -1.514048 | 0.781639  |
| C | 2.443430  | -1.681391 | -0.165511 |
| F | 0.680478  | 0.304462  | 1.787986  |
| H | 1.868425  | 0.577317  | -1.286948 |
| H | 2.084676  | 1.440011  | 0.891562  |
| H | -0.124799 | 2.970799  | 0.996735  |
| H | -0.212082 | 0.828207  | -2.350181 |

D-xylose oxocarbenium ion (94)

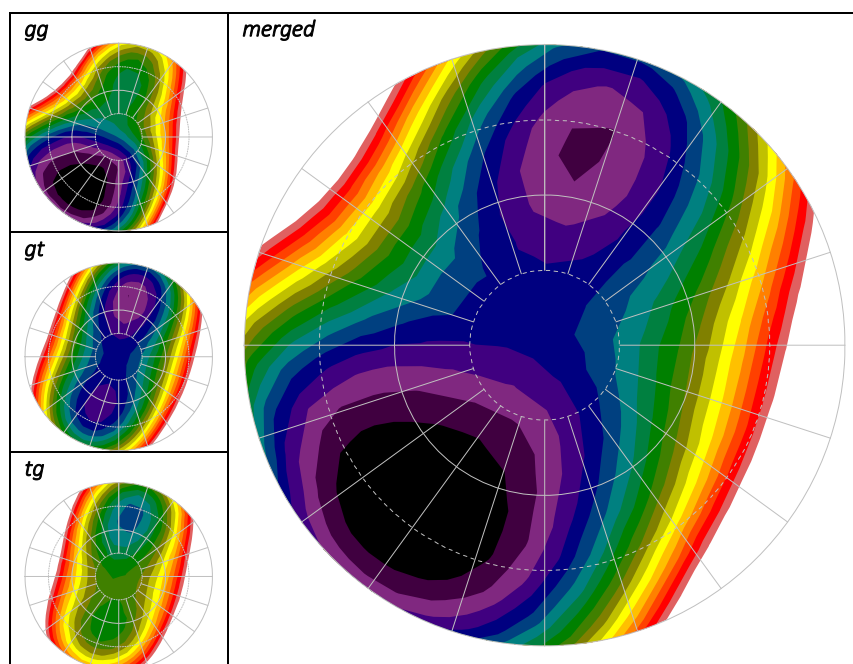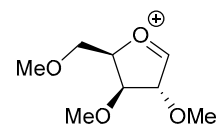

Local minima

${}^4T_3$  conformation (0.0 kcal / mol)

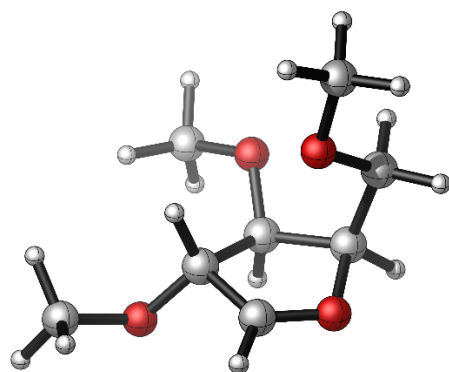

D1 = -20°      P = 219.6°  
D3 = 10°       $\tau_m$  = 26.0

$E_{\text{gas}}(\text{B3LYP}) = -614.607621849$  a.u.

$E_{\text{solv}}(\text{B3LYP}) = -614.674769993$  a.u.

Zero-point energy correction = 0.230333 a.u.

Atom coordinates

|   |           |           |           |
|---|-----------|-----------|-----------|
| C | 0.881193  | -0.012355 | -1.359097 |
| C | -0.371466 | 0.667528  | -0.763149 |
| C | -0.999319 | -0.437608 | 0.135164  |
| C | -0.374775 | -1.671954 | -0.438404 |
| O | 0.510295  | -1.476907 | -1.302917 |
| C | 2.147010  | 0.126518  | -0.538657 |
| O | 0.002772  | 1.839263  | -0.109593 |
| O | -2.391460 | -0.524778 | -0.039076 |
| O | 1.872995  | -0.383754 | 0.747636  |
| C | 2.976684  | -0.290554 | 1.645905  |
| C | -3.121573 | -0.988068 | 1.108034  |
| C | -1.081461 | 2.731935  | 0.161788  |
| H | 1.051303  | 0.195995  | -2.416254 |
| H | -1.090864 | 0.868287  | -1.572718 |
| H | -0.692889 | -0.298764 | 1.179375  |
| H | -0.682794 | -2.710063 | -0.268146 |
| H | 2.963892  | -0.426611 | -1.022120 |
| H | 2.404656  | 1.193697  | -0.514041 |
| H | 2.655733  | -0.734095 | 2.587445  |
| H | 3.842441  | -0.841935 | 1.260407  |
| H | 3.256816  | 0.755802  | 1.812430  |
| H | -4.173846 | -0.941211 | 0.834206  |
| H | -2.858626 | -2.020361 | 1.361385  |
| H | -2.930195 | -0.339943 | 1.969922  |
| H | -0.636970 | 3.636007  | 0.574334  |
| H | -1.626566 | 2.973883  | -0.757407 |
| H | -1.776668 | 2.306077  | 0.893285  |

**<sup>4</sup>E conformation (0.4 kcal / mol)**

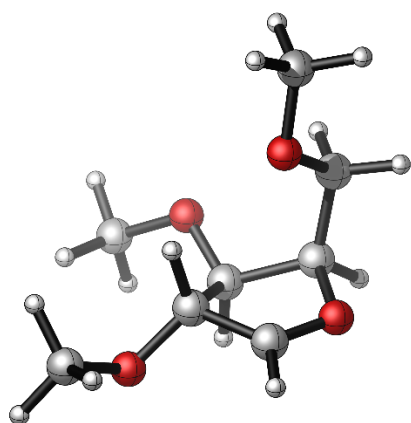

D1 = -20°      P = 232.0°  
D3 = 20°      τ<sub>m</sub> = 33.3

E<sub>gas</sub>(B3LYP) = -614.607890375 a.u.  
E<sub>soln</sub>(B3LYP) = -614.674459414 a.u.  
Zero-point energy correction = 0.230535 a.u.

Atom coordinates

|   |           |           |           |
|---|-----------|-----------|-----------|
| C | 0.875110  | 0.283383  | -1.334999 |
| C | -0.430122 | 0.780922  | -0.677700 |
| C | -0.920481 | -0.461497 | 0.122583  |
| C | -0.171045 | -1.561595 | -0.572071 |
| O | 0.580556  | -1.183781 | -1.507563 |
| C | 2.111824  | 0.350561  | -0.460106 |
| O | -0.157978 | 1.920723  | 0.075504  |
| O | -2.285739 | -0.718104 | -0.114563 |
| O | 1.824947  | -0.364762 | 0.722985  |
| C | 2.958468  | -0.575629 | 1.566732  |
| C | -2.979105 | -1.373756 | 0.959678  |
| C | -1.317503 | 2.673549  | 0.442250  |
| H | 1.054589  | 0.670828  | -2.338283 |
| H | -1.176743 | 0.976928  | -1.462967 |
| H | -0.664708 | -0.379241 | 1.182982  |
| H | -0.350960 | -2.638461 | -0.483236 |
| H | 2.964913  | -0.088094 | -0.994394 |
| H | 2.318565  | 1.409479  | -0.258437 |
| H | 2.611772  | -1.159013 | 2.418379  |
| H | 3.741257  | -1.129203 | 1.035981  |
| H | 3.360741  | 0.380208  | 1.919059  |
| H | -4.018281 | -1.449332 | 0.645233  |
| H | -2.581123 | -2.377437 | 1.141236  |
| H | -2.907260 | -0.780240 | 1.877091  |
| H | -0.955026 | 3.572071  | 0.938632  |
| H | -1.898934 | 2.950257  | -0.444294 |
| H | -1.955971 | 2.113024  | 1.133920  |

**<sup>3</sup>E conformation (1.0 kcal / mol)**

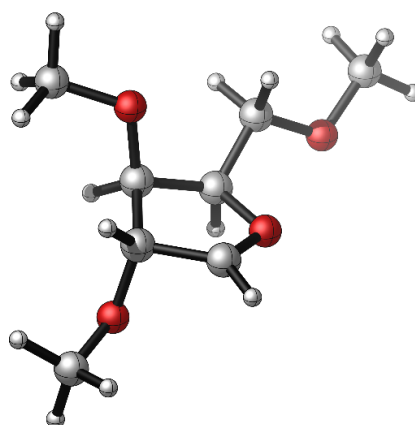

D1 = 20°      P = 18.0°  
D3 = 0°      τ<sub>m</sub> = 21.0

E<sub>gas</sub>(B3LYP) = -614.601682902 a.u.  
E<sub>soln</sub>(B3LYP) = -614.672404985 a.u.  
Zero-point energy correction = 0.229832 a.u.

Atom coordinates

|   |           |           |           |
|---|-----------|-----------|-----------|
| C | 0.659420  | -0.310701 | -0.428394 |
| C | -0.516122 | 0.668304  | -0.390786 |
| C | -1.648471 | -0.136073 | 0.299345  |
| C | -0.893347 | -1.220150 | 1.006663  |
| O | 0.298920  | -1.340410 | 0.658364  |
| C | 2.031748  | 0.233231  | -0.131540 |
| O | -0.147471 | 1.784189  | 0.383694  |
| O | -2.383963 | -0.889706 | -0.653222 |
| O | 2.959058  | -0.806788 | -0.340817 |
| C | 4.298636  | -0.406835 | -0.069354 |
| C | -3.782247 | -1.072330 | -0.359535 |
| C | -0.918771 | 2.961124  | 0.125762  |
| H | 0.668855  | -0.932657 | -1.328211 |
| H | -0.819355 | 0.941160  | -1.410635 |
| H | -2.273250 | 0.472074  | 0.961394  |
| H | -1.292958 | -1.952197 | 1.718004  |
| H | 2.199634  | 1.076888  | -0.819000 |
| H | 2.077514  | 0.625862  | 0.892218  |
| H | 4.930717  | -1.274543 | -0.254554 |
| H | 4.608292  | 0.414489  | -0.728114 |
| H | 4.413681  | -0.090539 | 0.975045  |
| H | -4.188191 | -1.633666 | -1.198822 |
| H | -3.928046 | -1.640207 | 0.563860  |
| H | -4.279163 | -0.100457 | -0.281638 |
| H | -0.498182 | 3.746086  | 0.751927  |
| H | -0.843385 | 3.249153  | -0.928445 |
| H | -1.973575 | 2.820858  | 0.389844  |

4-CO<sub>2</sub>Me-D-xylose oxocarbenium ion (95)

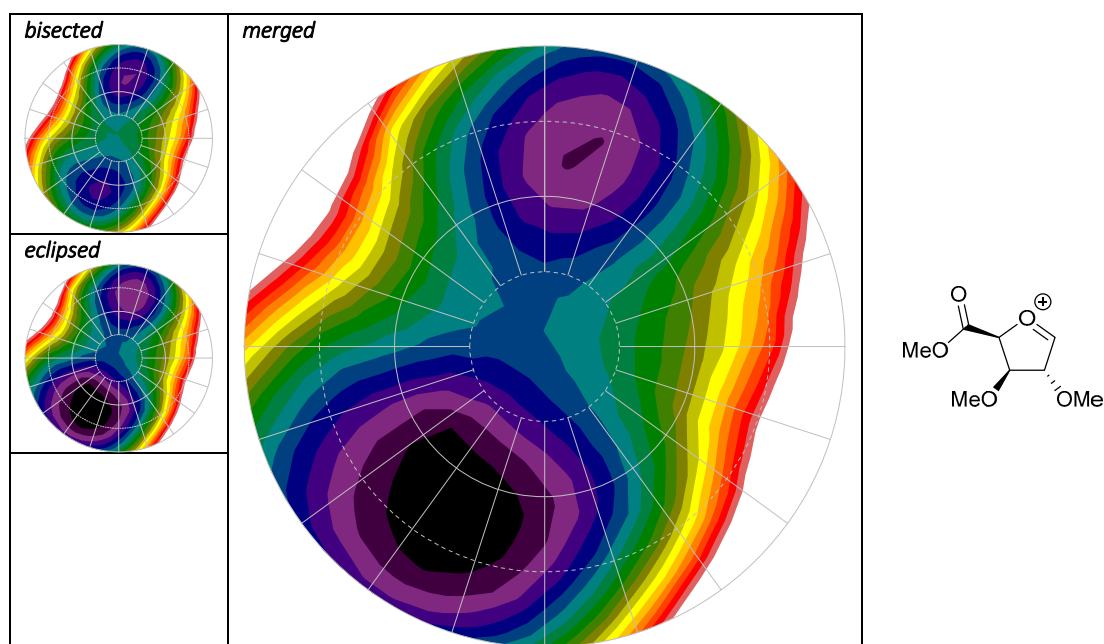

Local minima

Flat-<sup>4</sup>E conformation (0.0 kcal / mol)

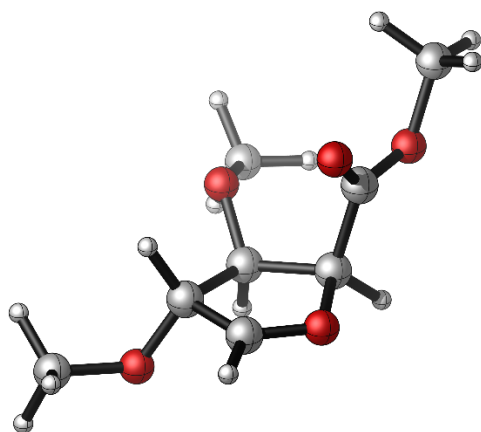

D1 = -10°

P = 232.4°

D3 = 10°

$\tau_m = 16.5$

$E_{\text{gas}}(\text{B3LYP}) = -688.655714009$  a.u.

$E_{\text{solv}}(\text{B3LYP}) = -688.727673410$  a.u.

Zero-point energy correction = 0.211641 a.u.

Atom coordinates

|   |           |           |           |
|---|-----------|-----------|-----------|
| C | -0.514223 | 0.628408  | -0.471114 |
| C | -1.655601 | -0.128388 | 0.251050  |
| C | -1.384226 | -1.557501 | -0.086913 |
| O | -0.373077 | -1.756018 | -0.801912 |
| C | 0.443258  | -0.517368 | -0.937048 |
| C | 1.602347  | -0.691461 | 0.050679  |
| O | 2.679300  | -0.068653 | -0.394027 |
| C | 3.837288  | -0.069546 | 0.488264  |
| O | 1.481152  | -1.287770 | 1.088742  |
| O | 0.083693  | 1.539659  | 0.402156  |
| O | -2.913913 | 0.184243  | -0.290031 |
| C | 0.686843  | 2.677403  | -0.236156 |
| C | -3.998475 | 0.225692  | 0.655665  |
| H | -0.940308 | 1.119903  | -1.356260 |
| H | -1.584821 | 0.041595  | 1.338352  |
| H | -2.024786 | -2.422209 | 0.121577  |
| H | 0.765444  | -0.490028 | -1.978686 |
| H | 4.589500  | 0.515818  | -0.032647 |
| H | 3.573787  | 0.387692  | 1.441635  |
| H | 4.176844  | -1.093340 | 0.642676  |
| H | 1.052757  | 3.313133  | 0.568048  |
| H | 1.523944  | 2.379901  | -0.874414 |
| H | -0.055928 | 3.222412  | -0.827338 |
| H | -4.873279 | 0.538404  | 0.089027  |
| H | -4.182330 | -0.759162 | 1.095916  |
| H | -3.781325 | 0.950751  | 1.446139  |

$E_3$  conformation (0.2 kcal / mol)

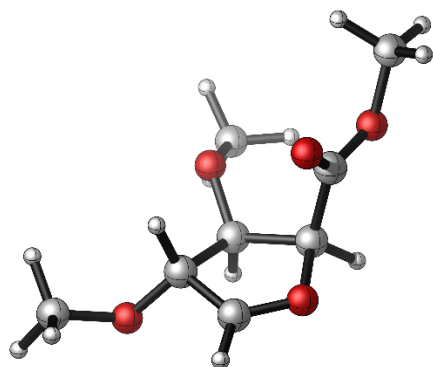

D1 = -20°      P = 198.2°  
D3 = 0°         $\tau_m$  = 21.0

$E_{\text{gas}}(\text{B3LYP}) = -688.655814018$  a.u.  
 $E_{\text{solv}}(\text{B3LYP}) = -688.728454663$  a.u.  
Zero-point energy correction = 0.211566 a.u.

Atom coordinates

|   |           |           |           |
|---|-----------|-----------|-----------|
| C | -0.521804 | 0.576244  | -0.571132 |
| C | -1.625765 | -0.221404 | 0.165242  |
| C | -1.394304 | -1.609856 | -0.325455 |
| O | -0.302650 | -1.793302 | -0.914018 |
| C | 0.502664  | -0.534663 | -0.970215 |
| C | 1.597268  | -0.687457 | 0.087441  |
| O | 2.672496  | -0.008278 | -0.272305 |
| C | 3.768857  | 0.022090  | 0.684510  |
| O | 1.437996  | -1.315580 | 1.101587  |
| O | 0.000293  | 1.552953  | 0.274350  |
| O | -2.906618 | 0.228649  | -0.158964 |
| C | 0.578707  | 2.684175  | -0.397501 |
| C | -3.846869 | 0.263872  | 0.928581  |
| H | -0.962189 | 1.004920  | -1.482640 |
| H | -1.410149 | -0.206618 | 1.251742  |
| H | -2.074052 | -2.467608 | -0.253205 |
| H | 0.895805  | -0.493026 | -1.987019 |
| H | 4.530372  | 0.643142  | 0.221689  |
| H | 3.425405  | 0.455961  | 1.623294  |
| H | 4.137238  | -0.989976 | 0.849673  |
| H | 0.875745  | 3.378504  | 0.386326  |
| H | 1.458586  | 2.394509  | -0.979324 |
| H | -0.160080 | 3.159877  | -1.050177 |
| H | -4.754294 | 0.706773  | 0.522950  |
| H | -4.066145 | -0.742896 | 1.297996  |
| H | -3.460903 | 0.882895  | 1.744665  |

$^3E$  conformation (1.1 kcal / mol)

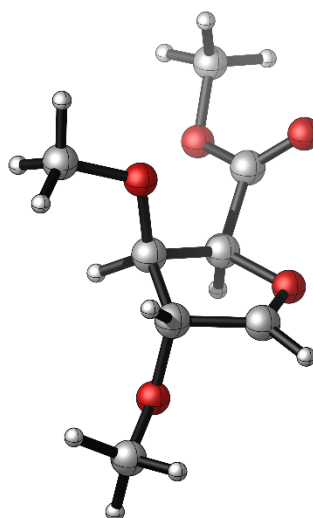

D1 = 20°        P = 18.0°  
D3 = 0°         $\tau_m$  = 21.0

$E_{\text{gas}}(\text{B3LYP}) = -688.653100738$  a.u.  
 $E_{\text{solv}}(\text{B3LYP}) = -688.727214809$  a.u.  
Zero-point energy correction = 0.211584 a.u.

Atom coordinates

|   |           |           |           |
|---|-----------|-----------|-----------|
| C | 0.428301  | 0.568540  | 0.286601  |
| C | 1.793532  | 0.091466  | -0.270539 |
| C | 1.464650  | -1.261900 | -0.817833 |
| O | 0.353747  | -1.713858 | -0.456876 |
| C | -0.355232 | -0.743042 | 0.448897  |
| C | -1.809692 | -0.680209 | -0.004220 |
| O | -2.504852 | -0.023559 | 0.913856  |
| C | -3.911583 | 0.193767  | 0.623688  |
| O | -2.221912 | -1.158570 | -1.024618 |
| O | -0.248891 | 1.360301  | -0.656829 |
| O | 2.667102  | -0.273015 | 0.788284  |
| C | 0.026173  | 2.762675  | -0.562769 |
| C | 4.067879  | -0.016640 | 0.560345  |
| H | 0.561023  | 1.066600  | 1.255645  |
| H | 2.234631  | 0.777311  | -1.000956 |
| H | 2.109187  | -1.921342 | -1.410393 |
| H | -0.261316 | -1.190982 | 1.443414  |
| H | -4.295085 | 0.746372  | 1.476772  |
| H | -4.012896 | 0.773151  | -0.293902 |
| H | -4.419612 | -0.764821 | 0.520017  |
| H | -0.596294 | 3.245419  | -1.313903 |
| H | -0.233475 | 3.139234  | 0.432163  |
| H | 1.078756  | 2.982407  | -0.775062 |
| H | 4.574618  | -0.330105 | 1.470787  |
| H | 4.447346  | -0.593369 | -0.287687 |
| H | 4.227397  | 1.051789  | 0.387560  |

2-N<sub>3</sub>-D-xylose oxocarbenium ion (96)

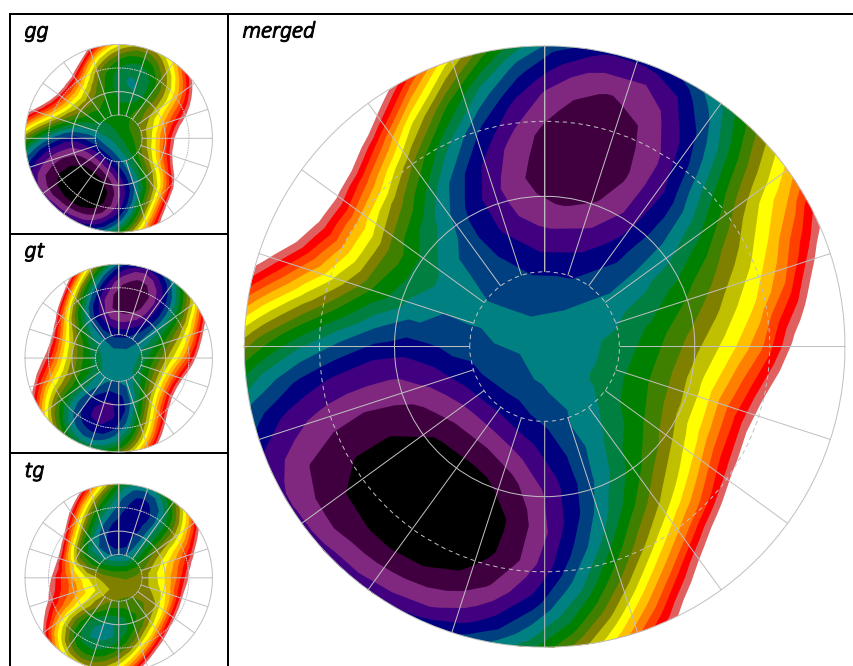

Local minima

<sup>4</sup>T<sub>3</sub> conformation (0.0 kcal / mol)

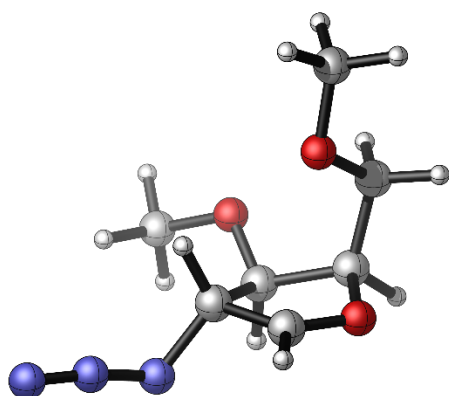

D1 = -20°      P = 219.4°  
D3 = 10°      τ<sub>m</sub> = 25.9

E<sub>gas</sub>(B3LYP) = -663.672575796 a.u.

E<sub>solv</sub>(B3LYP) = -663.746133264 a.u.

Zero-point energy correction = 0.200985 a.u.

Atom coordinates

|   |           |           |           |
|---|-----------|-----------|-----------|
| C | -0.041453 | 0.798806  | -0.791994 |
| C | -0.849177 | -0.329530 | -0.076754 |
| C | -0.258271 | -1.554043 | -0.696648 |
| O | 0.730880  | -1.360402 | -1.438140 |
| C | 1.215996  | 0.066837  | -1.312898 |
| C | 2.388390  | 0.019475  | -0.355432 |
| O | 0.350499  | 1.866790  | 0.008889  |
| O | 1.934881  | -0.576338 | 0.839526  |
| C | 2.942625  | -0.676092 | 1.844435  |
| C | -0.678956 | 2.826469  | 0.267570  |
| N | -2.277747 | -0.279772 | -0.419110 |
| N | -3.069327 | -0.622868 | 0.474544  |
| N | -3.900652 | -0.890668 | 1.187126  |
| H | -0.640542 | 1.136541  | -1.651871 |
| H | -0.653911 | -0.331525 | 1.004890  |
| H | -0.654517 | -2.574534 | -0.634292 |
| H | 1.519236  | 0.353038  | -2.321003 |
| H | 3.208596  | -0.557283 | -0.804459 |
| H | 2.723635  | 1.053675  | -0.200662 |
| H | 3.793481  | -1.267868 | 1.486972  |
| H | 3.291596  | 0.317934  | 2.146102  |
| H | 2.487651  | -1.175624 | 2.698584  |
| H | -0.202479 | 3.647214  | 0.800779  |
| H | -1.111841 | 3.195731  | -0.668682 |
| H | -1.471823 | 2.403929  | 0.893858  |



$E_3$  conformation (0.1 kcal / mol)

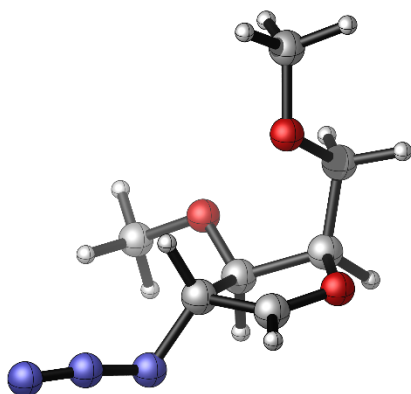

D1 = -20°      P = 198.2°  
D3 = 0°       $\tau_m$  = 21.0

$E_{\text{gas}}(\text{B3LYP}) = -663.670727128$  a.u.  
 $E_{\text{solV}}(\text{B3LYP}) = -663.745199693$  a.u.  
Zero-point energy correction = 0.200744 a.u.

Atom coordinates

|   |           |           |           |
|---|-----------|-----------|-----------|
| C | -0.038726 | 0.639228  | -0.870798 |
| C | -0.893499 | -0.389496 | -0.065386 |
| C | -0.339172 | -1.685072 | -0.551675 |
| O | 0.732407  | -1.608925 | -1.187497 |
| C | 1.206555  | -0.171475 | -1.303307 |
| C | 2.410207  | -0.057994 | -0.394077 |
| O | 0.363881  | 1.770502  | -0.167414 |
| O | 2.006374  | -0.475020 | 0.890863  |
| C | 2.999077  | -0.267576 | 1.892120  |
| C | -0.624056 | 2.802108  | -0.076837 |
| N | -2.321312 | -0.291038 | -0.386047 |
| N | -3.112438 | -0.468274 | 0.553747  |
| N | -3.944660 | -0.590131 | 1.304573  |
| H | -0.617268 | 0.909480  | -1.767656 |
| H | -0.675094 | -0.314709 | 1.012336  |
| H | -0.780895 | -2.679804 | -0.415156 |
| H | 1.473715  | -0.058840 | -2.355545 |
| H | 3.227328  | -0.682843 | -0.780378 |
| H | 2.730160  | 0.992404  | -0.408329 |
| H | 3.917309  | -0.818255 | 1.654999  |
| H | 3.232055  | 0.798461  | 1.996803  |
| H | 2.586367  | -0.641821 | 2.828104  |
| H | -0.126426 | 3.660062  | 0.371902  |
| H | -0.999540 | 3.071015  | -1.070319 |
| H | -1.462450 | 2.500160  | 0.559465  |

$^3E$  conformation (0.8 kcal / mol)

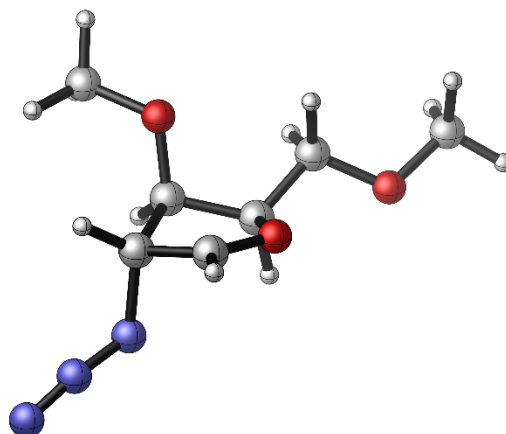

D1 = 30°      P = 18.0°  
D3 = 0°       $\tau_m$  = 31.5

$E_{\text{gas}}(\text{B3LYP}) = -663.668124678$  a.u.  
 $E_{\text{solV}}(\text{B3LYP}) = -663.744734611$  a.u.  
Zero-point energy correction = 0.200464 a.u.

Atom coordinates

|   |           |           |           |
|---|-----------|-----------|-----------|
| C | -0.257663 | 0.787467  | -0.397852 |
| C | -1.473068 | 0.143169  | 0.319603  |
| C | -0.784806 | -0.781987 | 1.281214  |
| O | 0.395694  | -1.050669 | 0.976938  |
| C | 0.786465  | -0.321499 | -0.336293 |
| C | 2.233064  | 0.076953  | -0.237673 |
| O | 0.215485  | 1.886627  | 0.335699  |
| O | 3.008962  | -1.094681 | -0.327581 |
| C | 4.405366  | -0.837724 | -0.212139 |
| C | -0.396418 | 3.138259  | 0.001508  |
| N | -2.162775 | -0.808380 | -0.578041 |
| N | -3.389117 | -0.930618 | -0.411536 |
| N | -4.496662 | -1.131738 | -0.391989 |
| H | -0.502595 | 1.034259  | -1.439991 |
| H | -2.145290 | 0.859249  | 0.802504  |
| H | -1.224128 | -1.284721 | 2.151102  |
| H | 0.631837  | -1.100650 | -1.088637 |
| H | 2.434620  | 0.767557  | -1.072855 |
| H | 2.415969  | 0.623793  | 0.695986  |
| H | 4.754664  | -0.179232 | -1.017485 |
| H | 4.644829  | -0.378730 | 0.755223  |
| H | 4.910107  | -1.799958 | -0.289316 |
| H | 0.091102  | 3.889464  | 0.620165  |
| H | -0.239968 | 3.372200  | -1.056740 |
| H | -1.470036 | 3.133875  | 0.220345  |

2-F-D-xylose oxocarbenium ion (97)

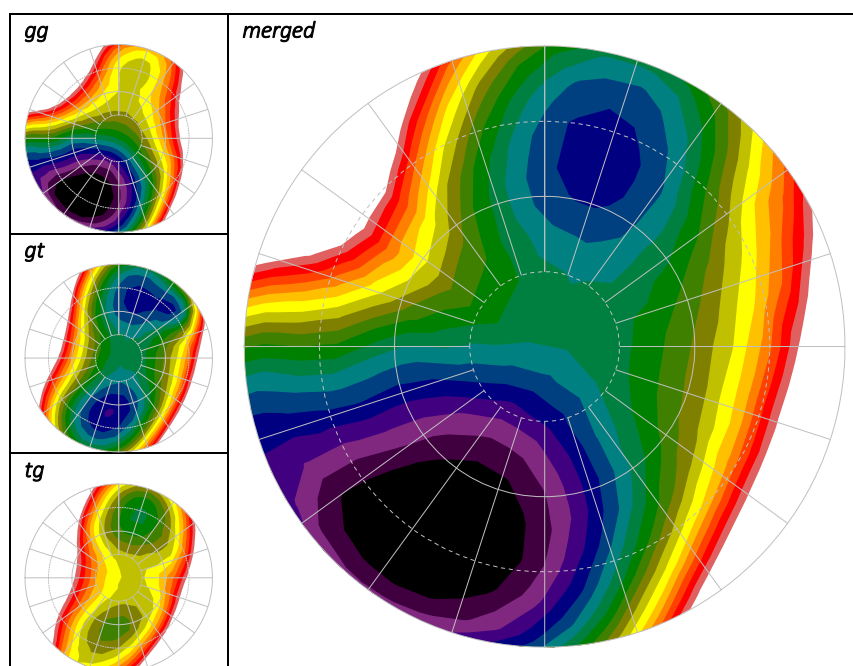

Local minima

${}^4T_3$  conformation (0.0 kcal / mol)

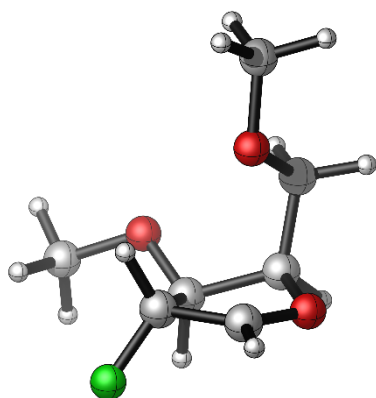

D1 = -20°      P = 219.4°  
D3 = 10°       $\tau_m$  = 25.9

$E_{\text{gas}}(\text{B3LYP}) = -599.307105502$  a.u.

$E_{\text{soln}}(\text{B3LYP}) = -599.381056097$  a.u.

Zero-point energy correction = 0.190330 a.u.

Atom coordinates

|   |           |           |           |
|---|-----------|-----------|-----------|
| C | 0.917655  | 0.195379  | 0.570953  |
| C | 0.996466  | -0.739495 | -0.660243 |
| C | 0.146983  | -1.897360 | -0.232196 |
| O | -0.459013 | -1.735055 | 0.846517  |
| C | -0.352082 | -0.295948 | 1.307479  |
| C | -1.641511 | 0.362047  | 0.859765  |
| O | 0.796026  | 1.553428  | 0.296221  |
| O | -1.741616 | 0.160259  | -0.532325 |
| C | -2.894333 | 0.761682  | -1.121966 |
| C | 2.027471  | 2.187020  | -0.069104 |
| F | 2.271718  | -1.212167 | -0.920845 |
| H | 1.799305  | -0.019133 | 1.197499  |
| H | 0.587110  | -0.274915 | -1.565006 |
| H | 0.082144  | -2.877750 | -0.719766 |
| H | -0.261564 | -0.349473 | 2.393109  |
| H | -2.491963 | -0.083426 | 1.393074  |
| H | -1.571105 | 1.426222  | 1.120989  |
| H | -2.870476 | 1.849922  | -0.997933 |
| H | -2.868880 | 0.516060  | -2.182542 |
| H | -3.812946 | 0.362710  | -0.676719 |
| H | 1.800659  | 3.243993  | -0.194863 |
| H | 2.777643  | 2.060366  | 0.719422  |
| H | 2.417528  | 1.785916  | -1.011081 |

**<sup>4</sup>E conformation (0.0 kcal / mol)**

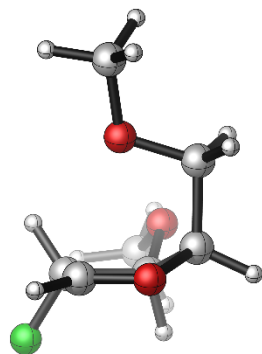

D1 = -20°      P = 232.8°  
D3 = 20°      τ<sub>m</sub> = 33.1

E<sub>gas</sub>(B3LYP) = -599.307199314 a.u.  
E<sub>solv</sub>(B3LYP) = -599.380553495 a.u.  
Zero-point energy correction = 0.190433 a.u.

Atom coordinates

|   |           |           |           |
|---|-----------|-----------|-----------|
| C | -0.990414 | -0.133978 | 0.533723  |
| C | -0.792302 | 0.857461  | -0.641124 |
| C | 0.262317  | 1.775236  | -0.087064 |
| O | 0.654390  | 1.482048  | 1.068168  |
| C | 0.312861  | 0.043386  | 1.347593  |
| C | 1.501398  | -0.738183 | 0.815130  |
| O | -1.133592 | -1.471371 | 0.182298  |
| O | 1.650667  | -0.365167 | -0.539381 |
| C | 2.894976  | -0.754103 | -1.132145 |
| C | -2.450825 | -1.822613 | -0.258969 |
| F | -1.910896 | 1.644314  | -0.884392 |
| H | -1.838507 | 0.233352  | 1.135011  |
| H | -0.481342 | 0.368354  | -1.568162 |
| H | 0.581016  | 2.734491  | -0.512764 |
| H | 0.197296  | -0.037737 | 2.428860  |
| H | 2.396728  | -0.493996 | 1.400640  |
| H | 1.273539  | -1.805970 | 0.921258  |
| H | 2.985388  | -1.844743 | -1.145502 |
| H | 2.884761  | -0.376459 | -2.153181 |
| H | 3.737187  | -0.319184 | -0.583726 |
| H | -2.435143 | -2.895534 | -0.440767 |
| H | -3.192038 | -1.587830 | 0.512827  |
| H | -2.710609 | -1.300900 | -1.186498 |

**E<sub>3</sub> conformation (0.1 kcal / mol)**

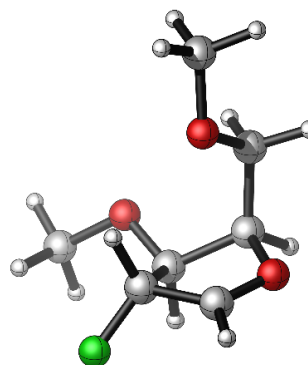

D1 = -30°      P = 198.1°  
D3 = 0°      τ<sub>m</sub> = 31.6

E<sub>gas</sub>(B3LYP) = -599.306785301 a.u.  
E<sub>solv</sub>(B3LYP) = -599.381040096 a.u.  
Zero-point energy correction = 0.190108 a.u.

Atom coordinates

|   |           |           |           |
|---|-----------|-----------|-----------|
| C | 0.924546  | 0.162361  | 0.576201  |
| C | 0.940381  | -0.769935 | -0.660921 |
| C | 0.226597  | -1.964714 | -0.123603 |
| O | -0.467862 | -1.738179 | 0.889452  |
| C | -0.379029 | -0.267318 | 1.289294  |
| C | -1.653559 | 0.399737  | 0.829152  |
| O | 0.872820  | 1.524206  | 0.308555  |
| O | -1.783625 | 0.189950  | -0.558513 |
| C | -2.948496 | 0.798706  | -1.115456 |
| C | 2.139850  | 2.115706  | -0.009268 |
| F | 2.205465  | -1.117246 | -1.088144 |
| H | 1.790090  | -0.105607 | 1.204710  |
| H | 0.365492  | -0.346181 | -1.494489 |
| H | 0.270565  | -2.992430 | -0.506254 |
| H | -0.307691 | -0.290155 | 2.378275  |
| H | -2.506053 | -0.021493 | 1.379864  |
| H | -1.562773 | 1.465457  | 1.082467  |
| H | -2.915823 | 1.887159  | -0.992598 |
| H | -2.955199 | 0.552840  | -2.176273 |
| H | -3.856970 | 0.405948  | -0.644145 |
| H | 1.958533  | 3.184021  | -0.110234 |
| H | 2.862181  | 1.937499  | 0.794871  |
| H | 2.536058  | 1.723081  | -0.951248 |

### <sup>3</sup>E conformation (2.3 kcal / mol)

E<sub>gas</sub>(B3LYP) = -599.298277566 a.u.

E<sub>solv</sub>(B3LYP) = -599.376251453 a.u.

Zero-point energy correction = 0.189647 a.u.

#### Atom coordinates

|   |           |           |           |
|---|-----------|-----------|-----------|
| C | -0.959849 | 0.405511  | -0.439196 |
| C | -1.937987 | -0.623413 | 0.171626  |
| C | -1.010937 | -1.592675 | 0.867406  |
| O | 0.183398  | -1.468749 | 0.557913  |
| C | 0.380988  | -0.326921 | -0.478363 |
| C | 1.616051  | 0.440618  | -0.093043 |
| O | -0.839123 | 1.522802  | 0.405515  |
| O | 2.724560  | -0.397966 | -0.313852 |
| C | 3.958374  | 0.216754  | 0.047600  |
| C | -1.808927 | 2.550954  | 0.167033  |
| F | -2.574000 | -1.392106 | -0.798088 |
| H | -1.280088 | 0.668835  | -1.457644 |
| H | -2.685227 | -0.189656 | 0.842895  |
| H | -1.293805 | -2.399502 | 1.555856  |
| H | 0.537586  | -0.897483 | -1.399036 |
| H | 1.643062  | 1.338857  | -0.730424 |
| H | 1.551434  | 0.777047  | 0.949725  |
| H | 3.972233  | 0.479222  | 1.112727  |
| H | 4.743148  | -0.510995 | -0.154782 |
| H | 4.139290  | 1.120761  | -0.547306 |
| H | -1.576883 | 3.354446  | 0.863580  |
| H | -1.733233 | 2.918209  | -0.861908 |
| H | -2.828477 | 2.195543  | 0.354120  |

Methyl (2,3-di-O-benzyl-1-O-(*N*-[phenyl]trifluoroacetimidoyl)- $\beta$ -D-ribofuranosyl uronate) (**1 $\beta$** ). [T=328 K]

$^1\text{H}$  NMR, 500 MHz,  $\text{CDCl}_3$  of compound **1 $\beta$**

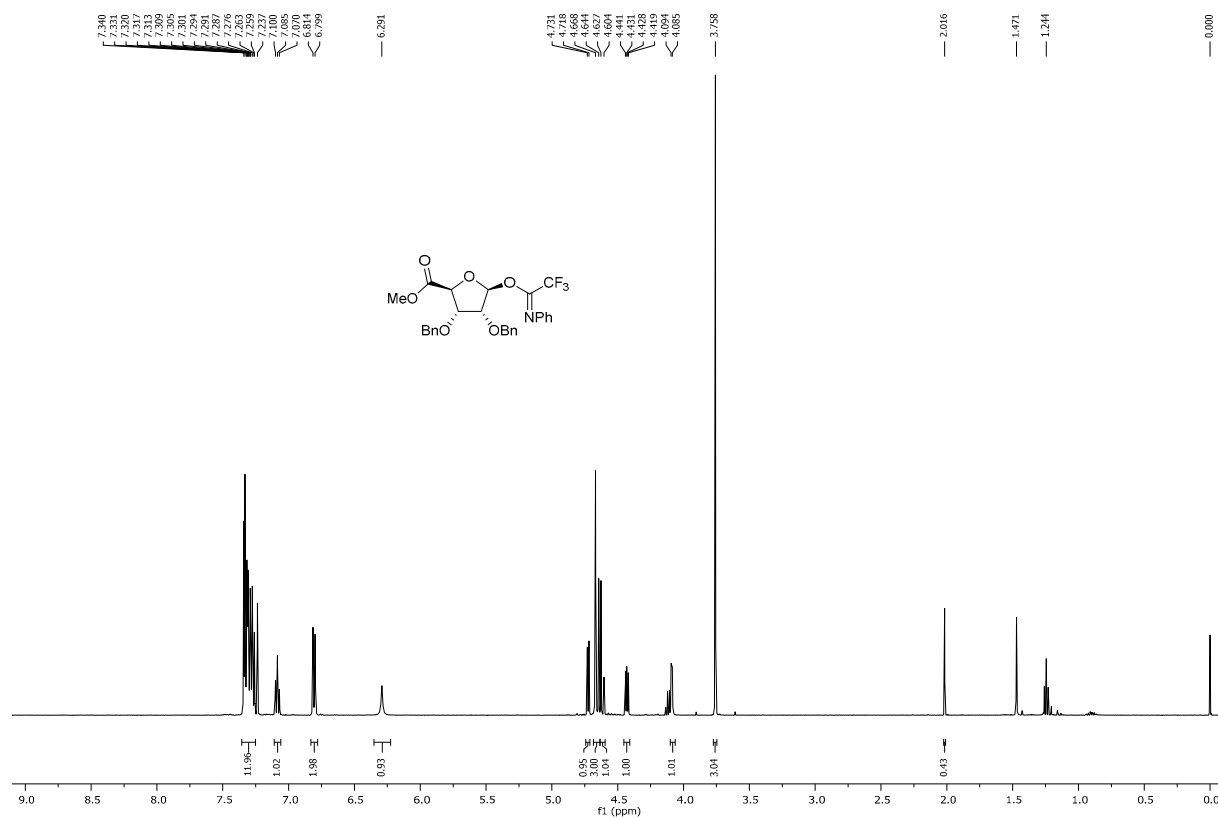

$^{13}\text{C}$ -APT NMR, 126 MHz,  $\text{CDCl}_3$  of compound **1 $\beta$**

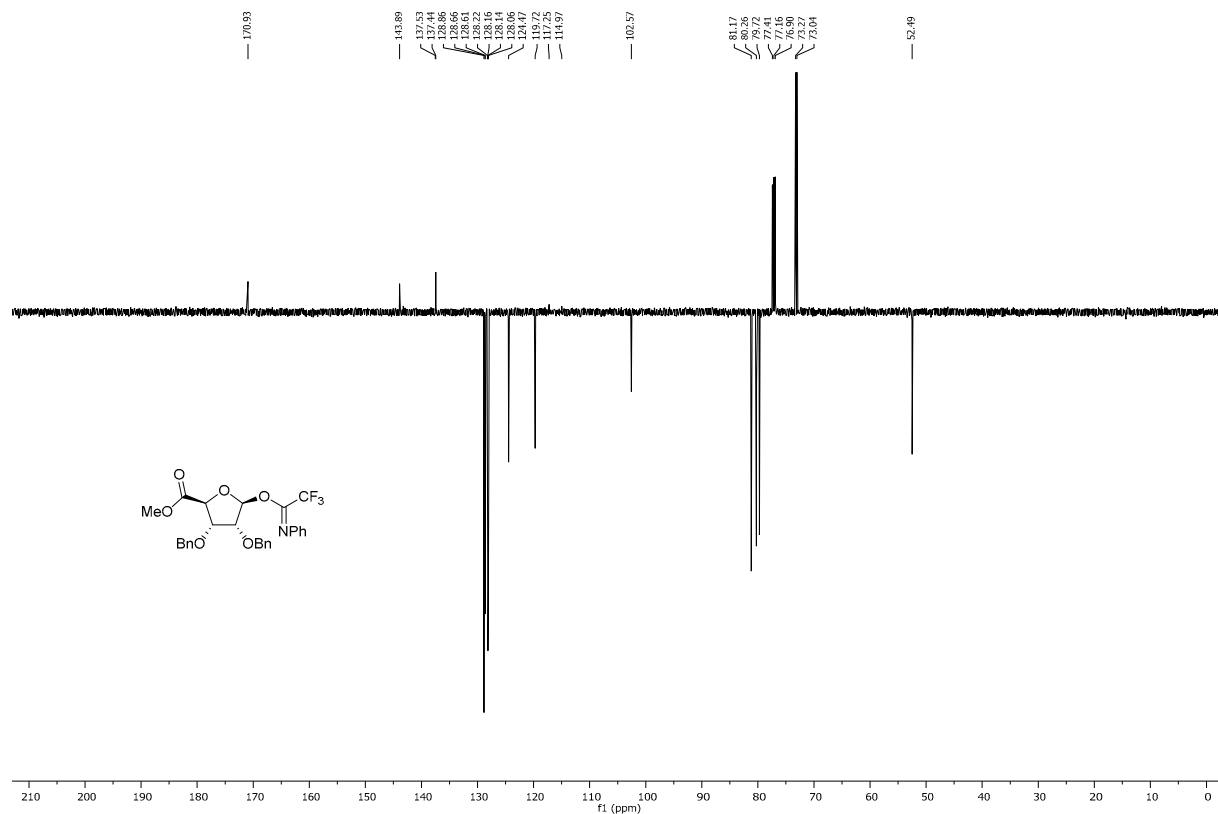

$^1\text{H}$ - $^1\text{H}$  COSY of compound **1 $\beta$**

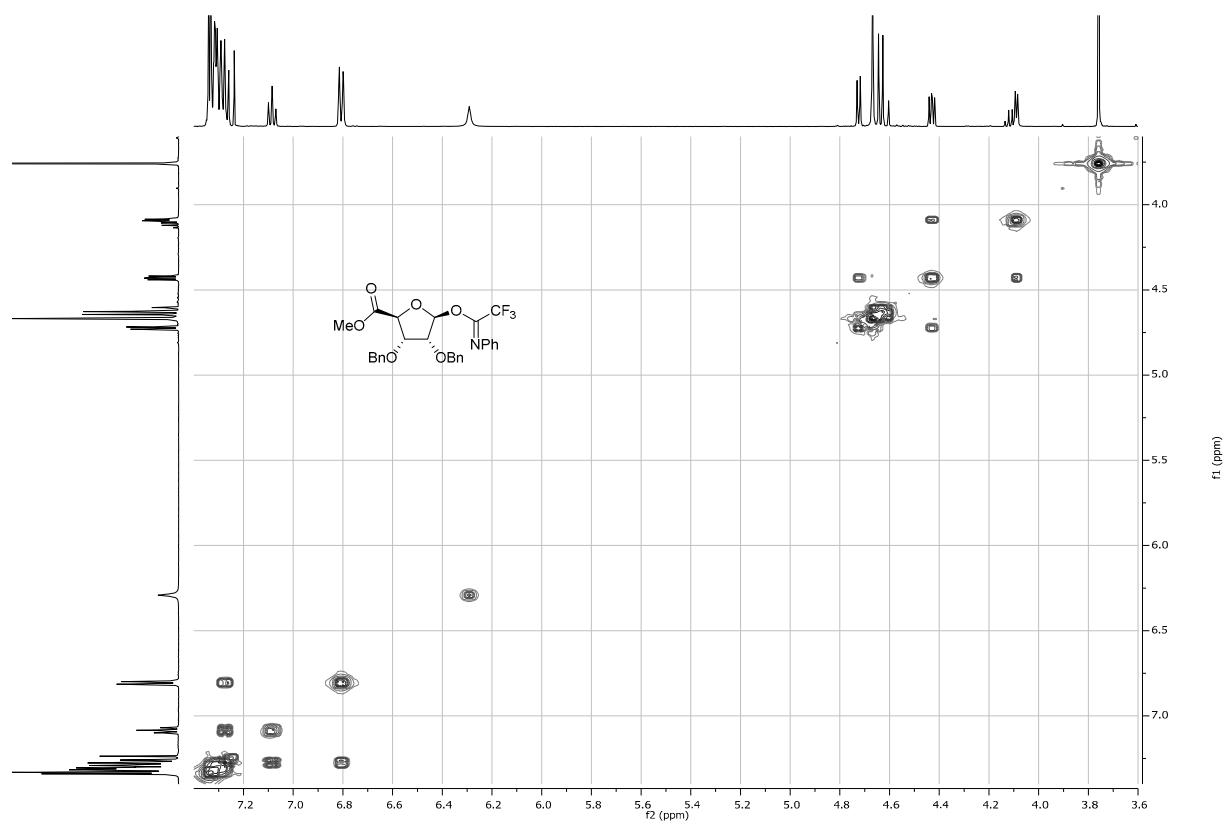

$^1\text{H}$ - $^{13}\text{C}$  HSQC of compound **1 $\beta$**

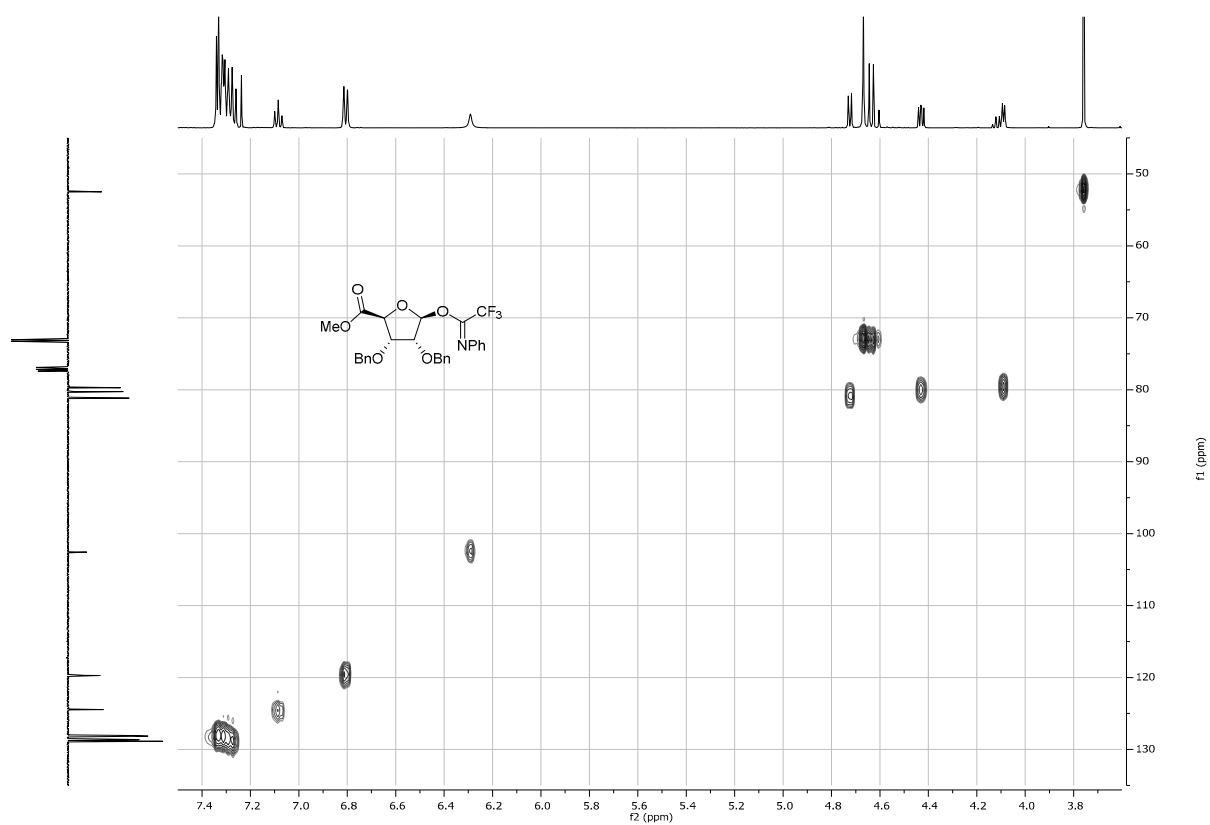

Methyl (2,3-di-O-benzyl-1-O-(*N*-[phenyl]trifluoroacetimidoyl)- $\alpha/\beta$ -D-arabinofuranosyl uronate) (2) [*T* = 323 K]

$^1\text{H}$  NMR, 500 MHz,  $\text{CDCl}_3$  of compound 2

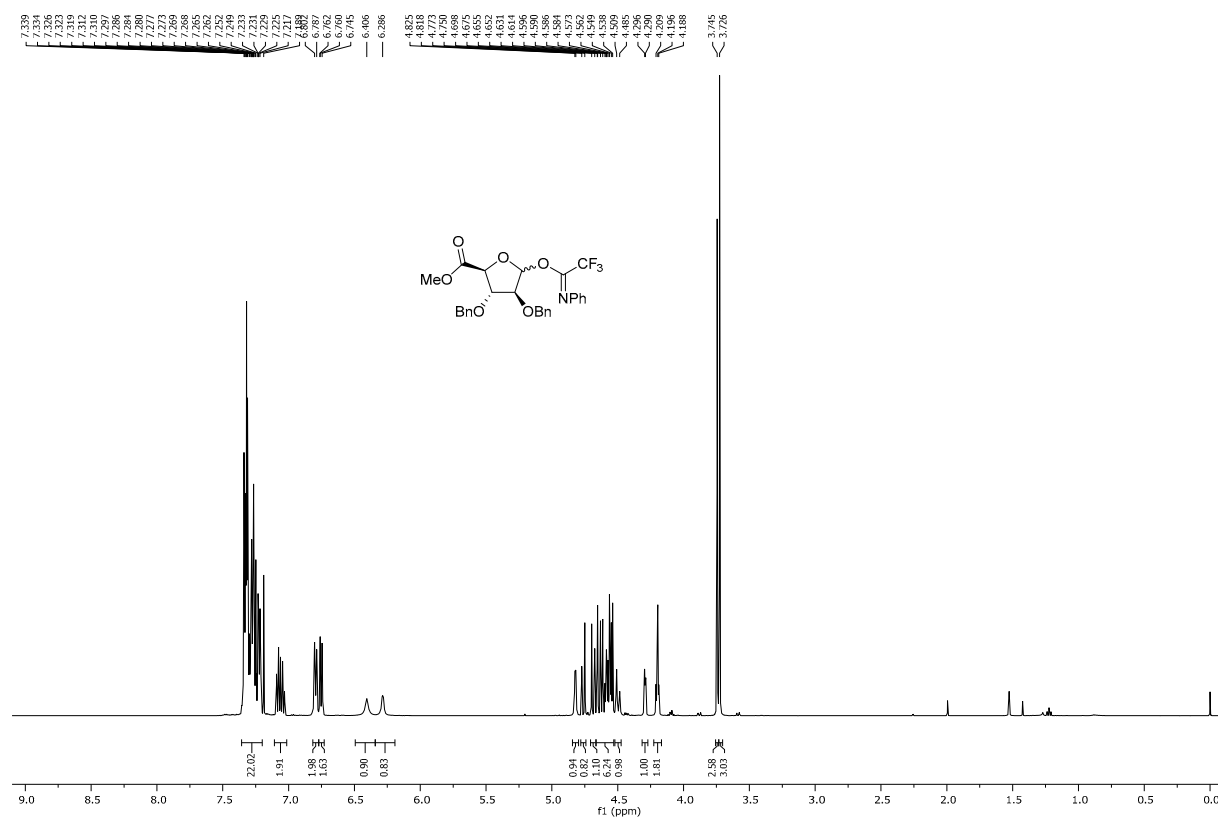

$^{13}\text{C}$ -APT NMR, 126 MHz,  $\text{CDCl}_3$  of compound 2

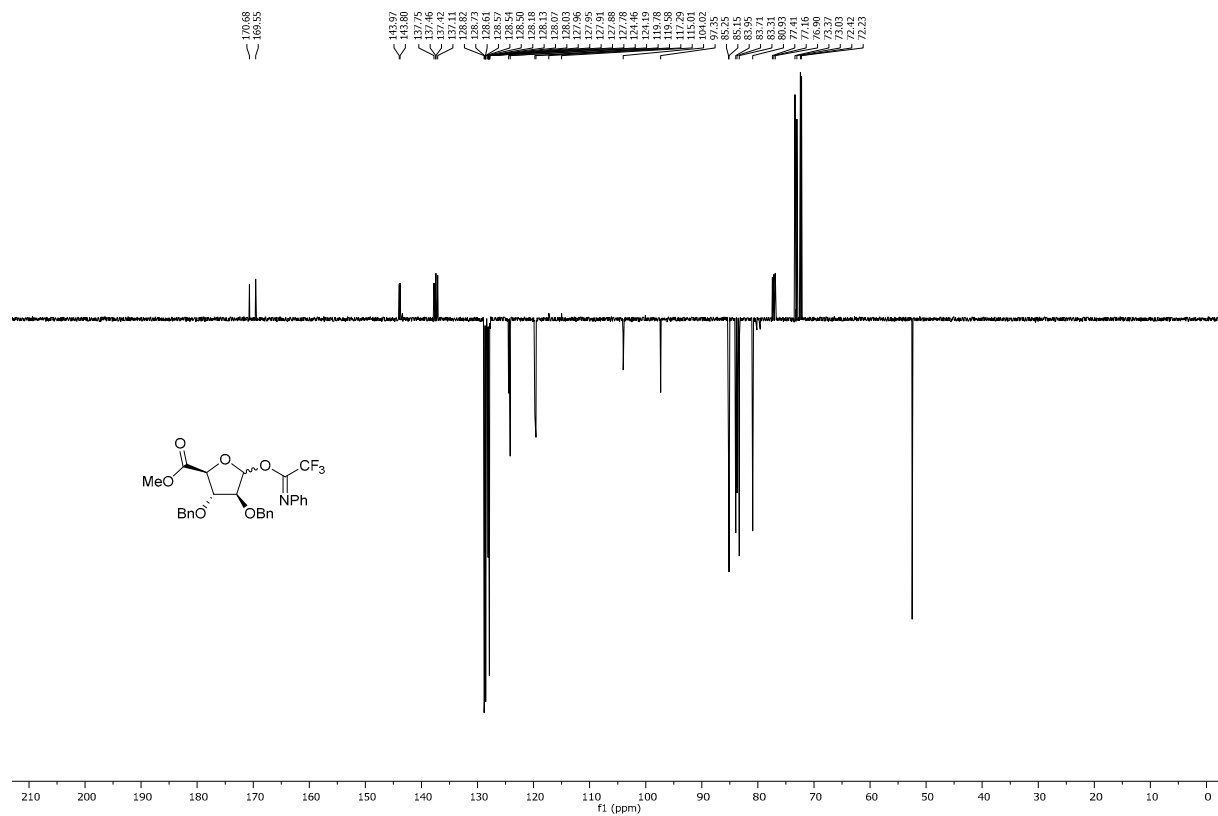

$^1\text{H}$ - $^1\text{H}$  COSY of compound **2**

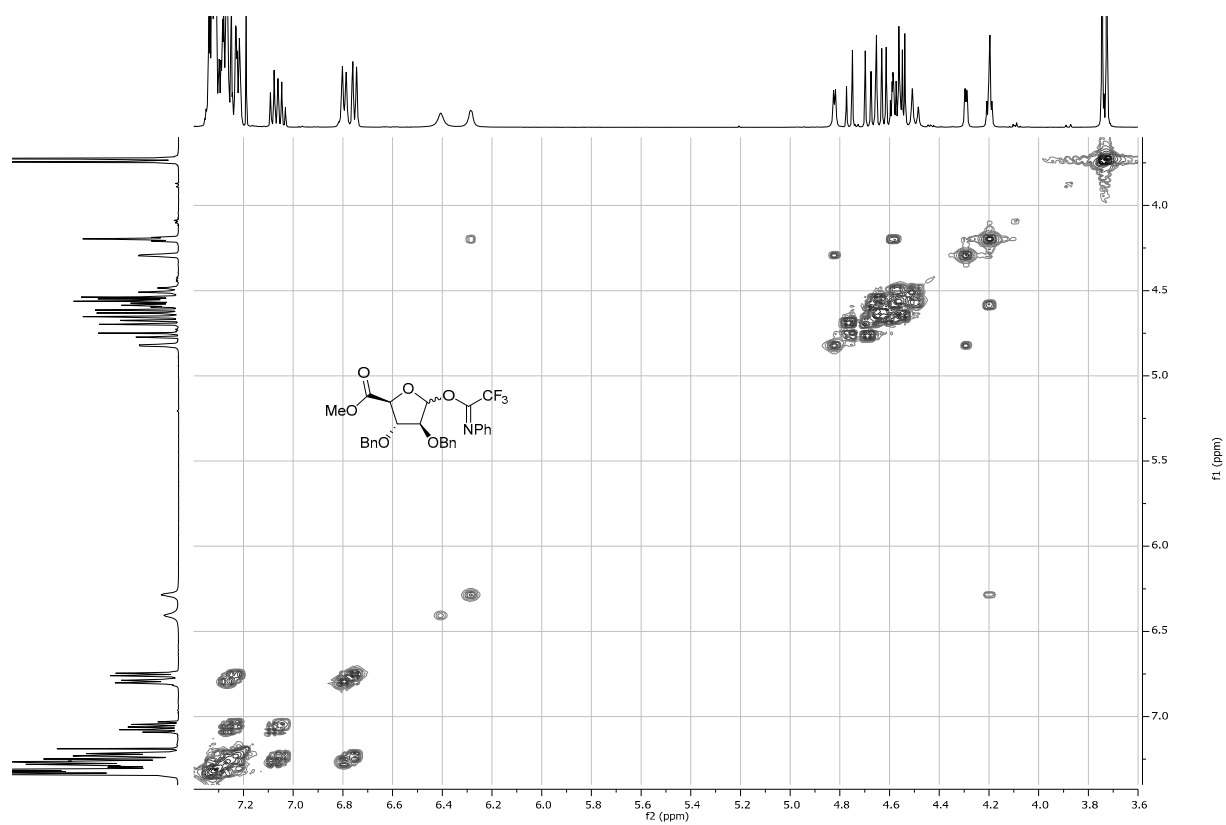

$^1\text{H}$ - $^{13}\text{C}$  HSQC of compound **2**

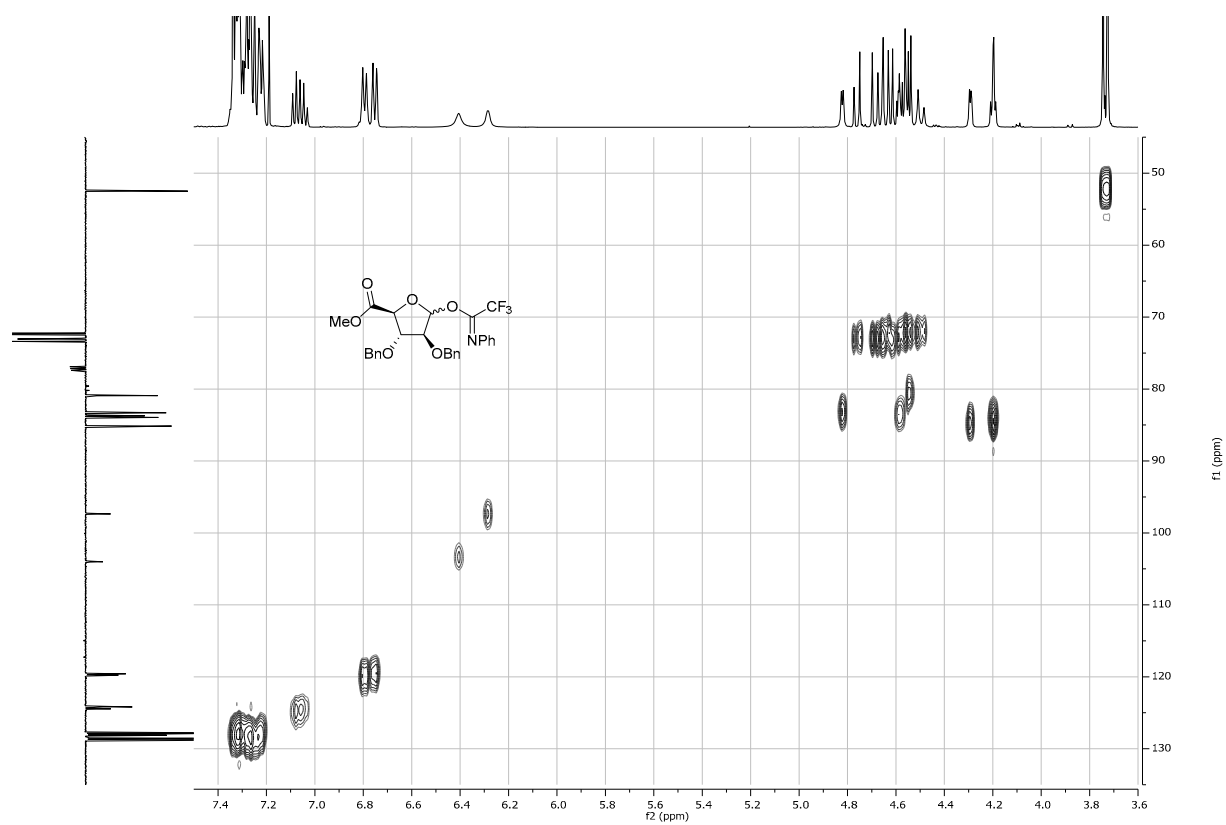



Methyl (2,3-di-*O*-benzyl-1-*O*-(*N*-[phenyl]trifluoroacetimidoyl)- $\alpha$ -D-lyxofuranosyl uronate) (**3 $\alpha$** ). [*T* = 323 K]

$^1\text{H}$  NMR, 500 MHz,  $\text{CDCl}_3$  of compound **3 $\alpha$**

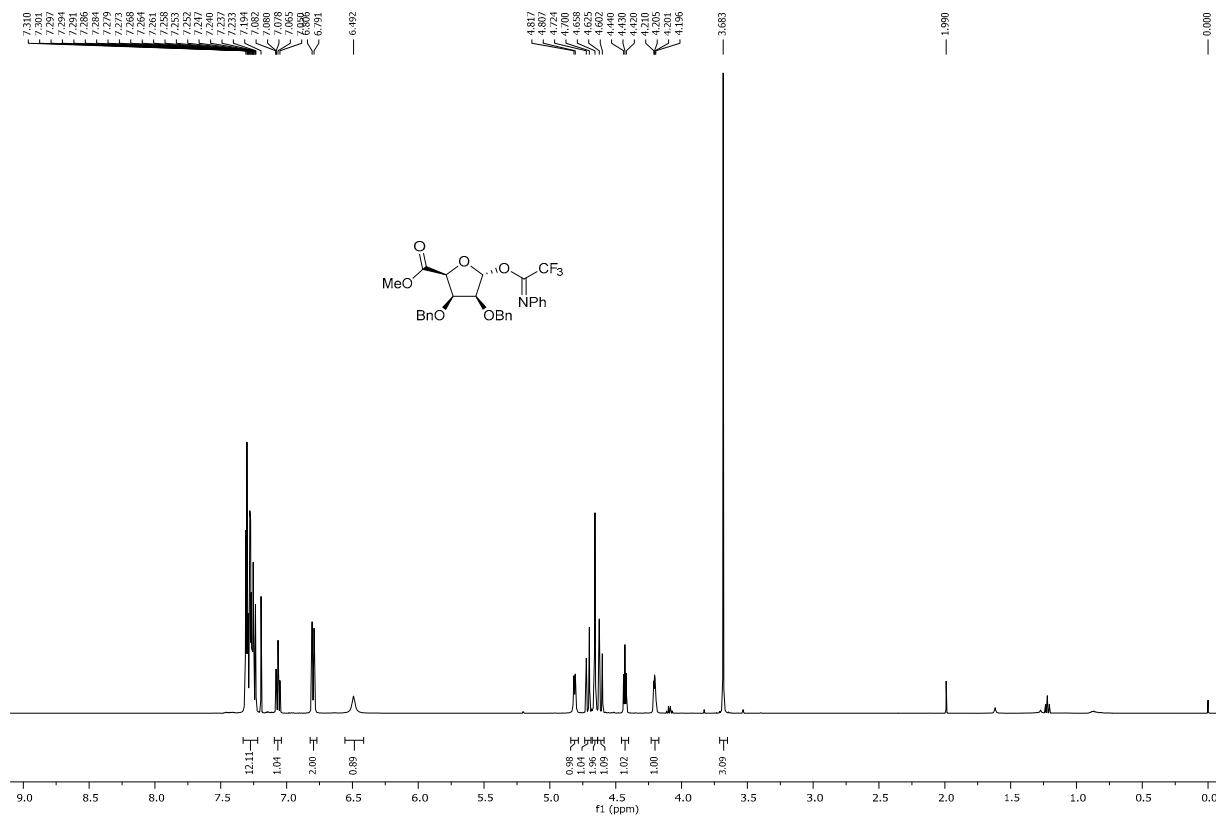

$^{13}\text{C}$ -APT NMR, 126 MHz,  $\text{CDCl}_3$  of compound **3 $\alpha$**

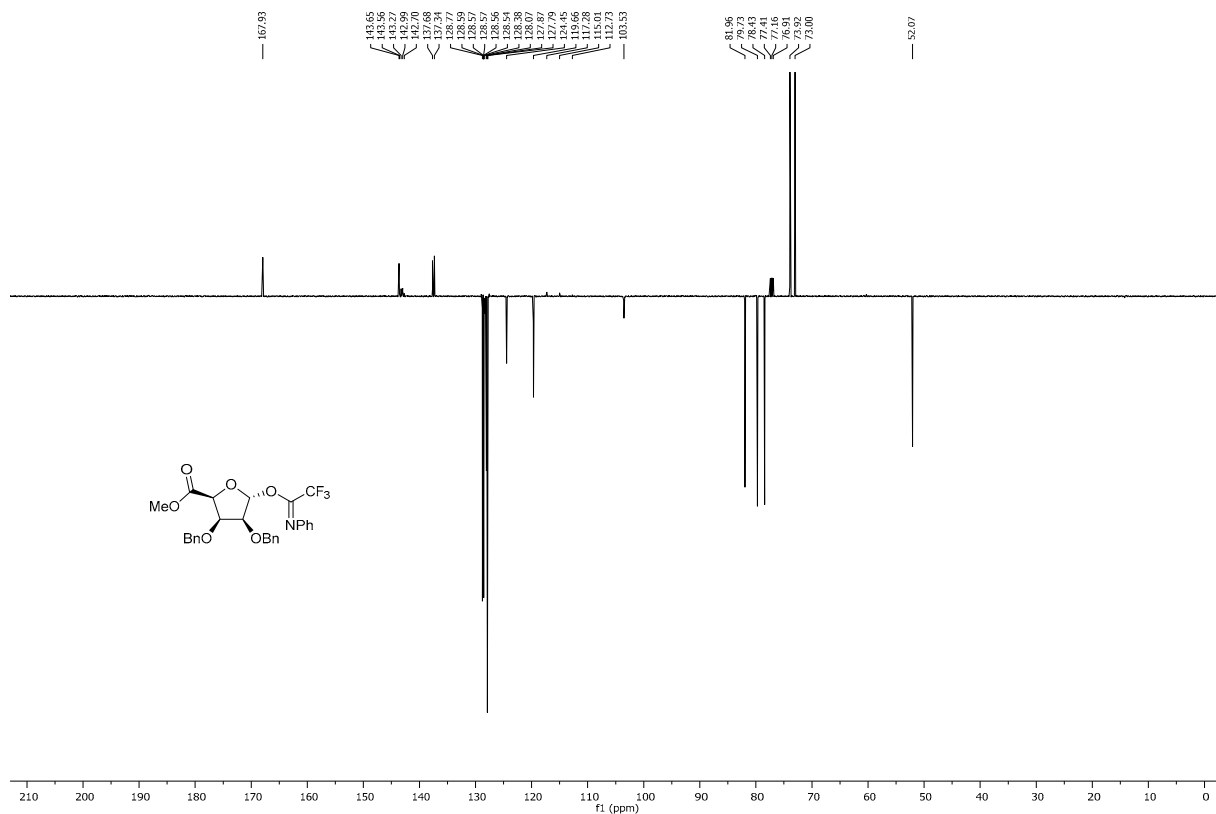

$^1\text{H}$ - $^1\text{H}$  COSY of compound **3a**

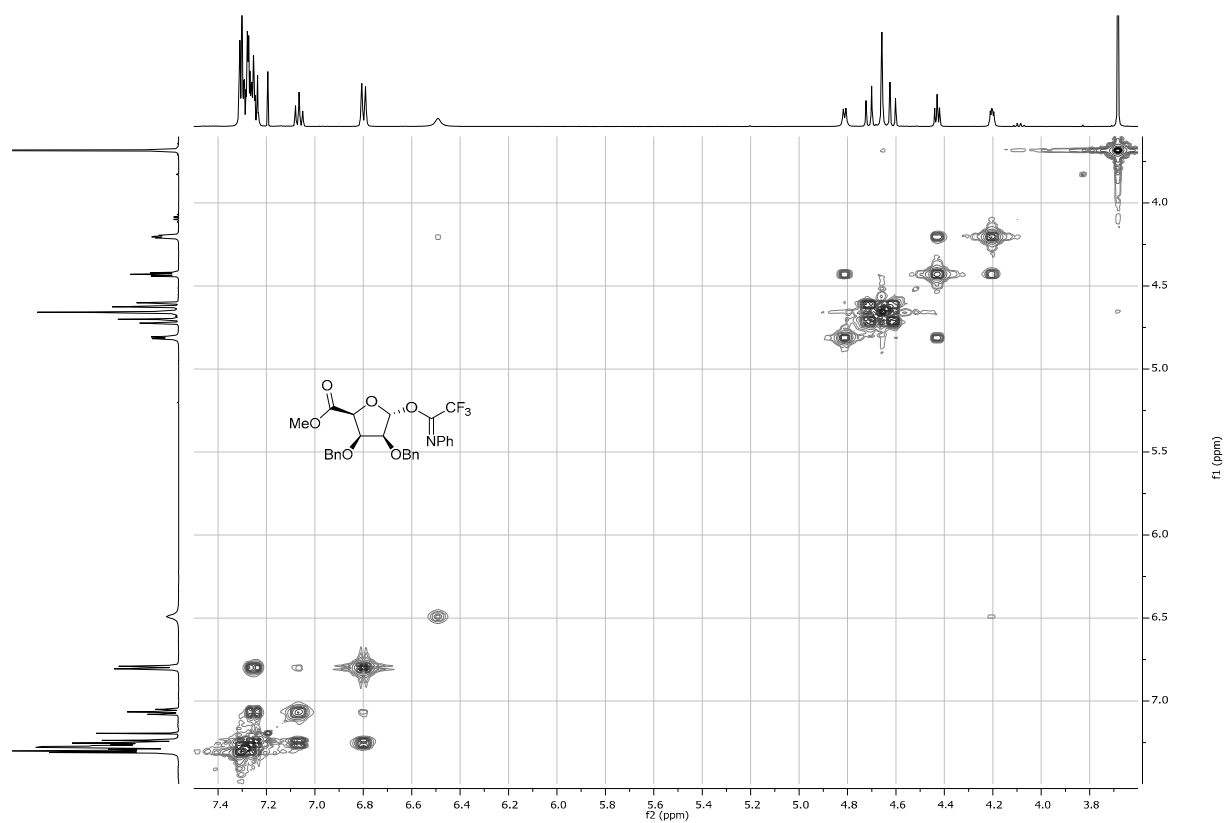

$^1\text{H}$ - $^{13}\text{C}$  HSQC of compound **3a**

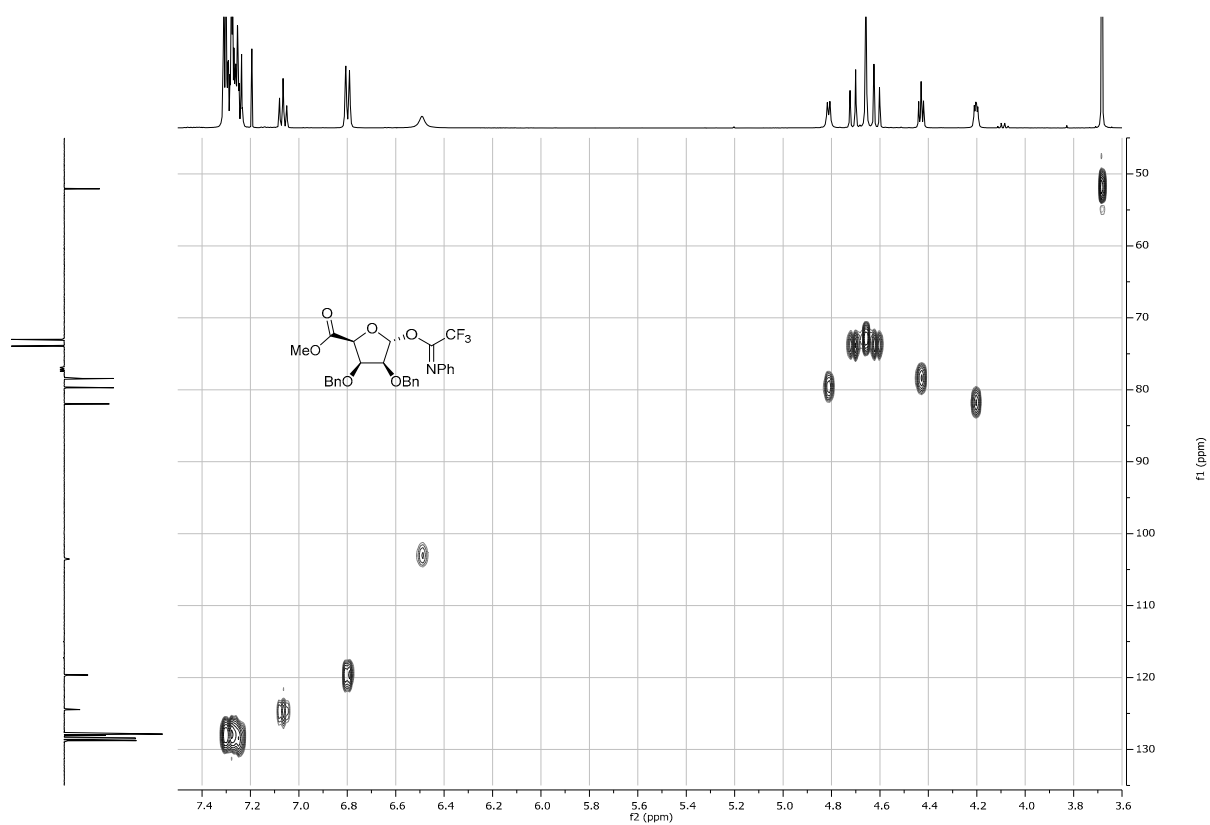

Methyl (2,3-di-O-benzyl-1-O-(*N*-[phenyl]trifluoroacetimidoyl)- $\beta$ -D-lyxofuranosyl uronate) (**3 $\beta$** ). [T = 323 K]

$^1\text{H}$  NMR, 500 MHz,  $\text{CDCl}_3$  of compound **3 $\beta$**

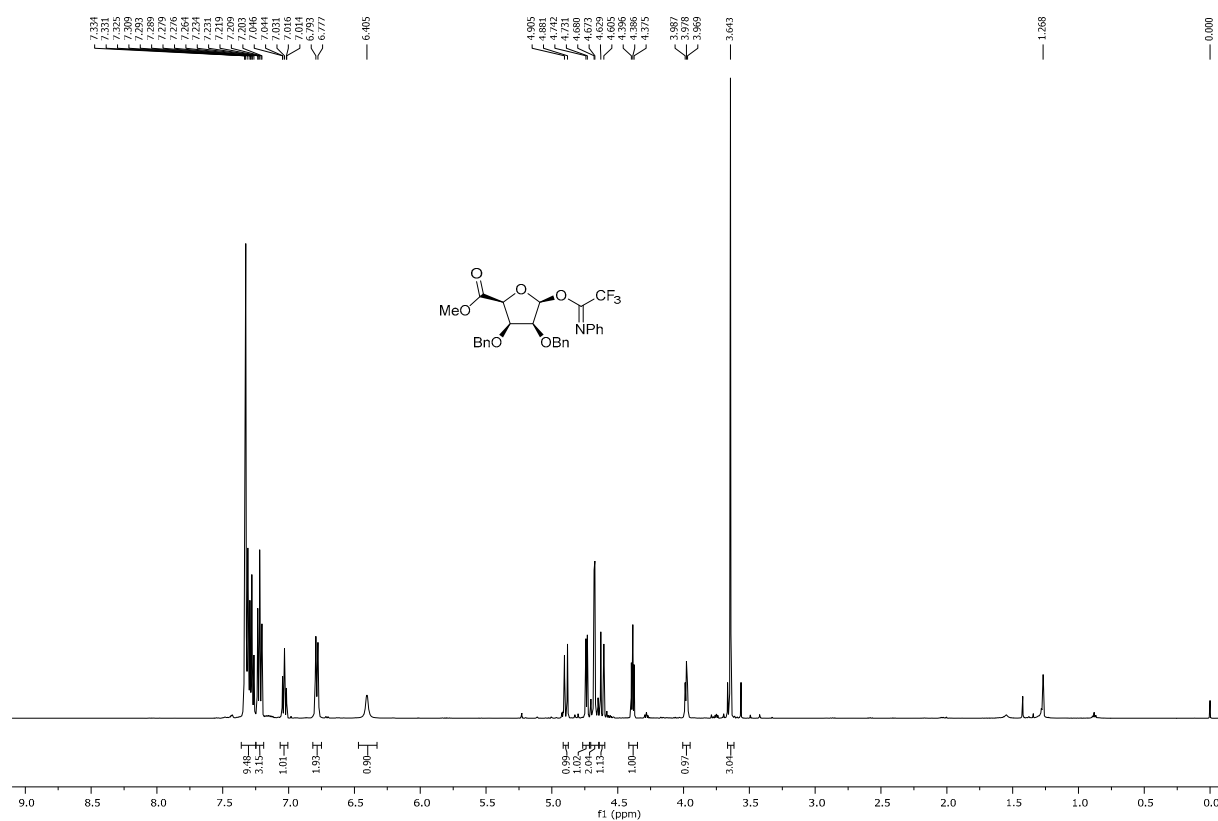

$^{13}\text{C}$ -APT NMR, 126 MHz,  $\text{CDCl}_3$  of compound **3 $\beta$**

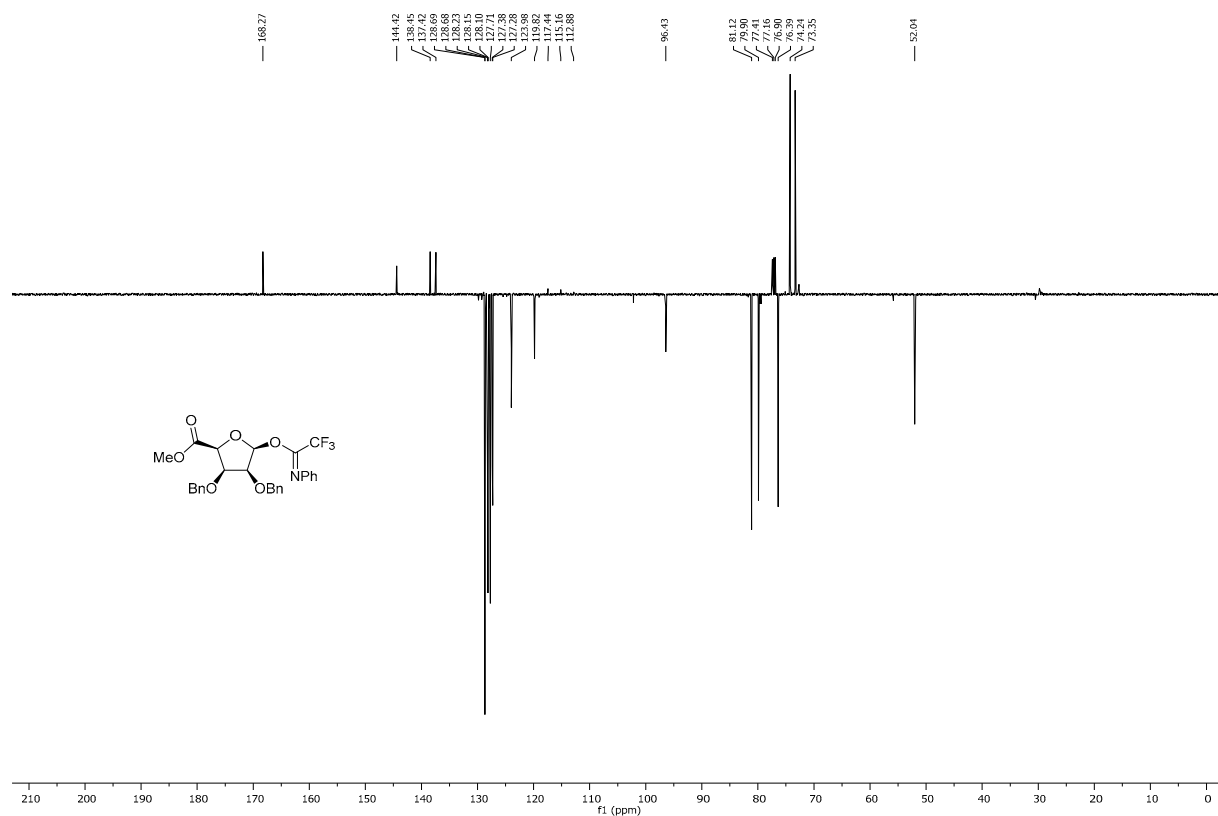

$^1\text{H}$ - $^1\text{H}$  COSY of compound **3 $\beta$**

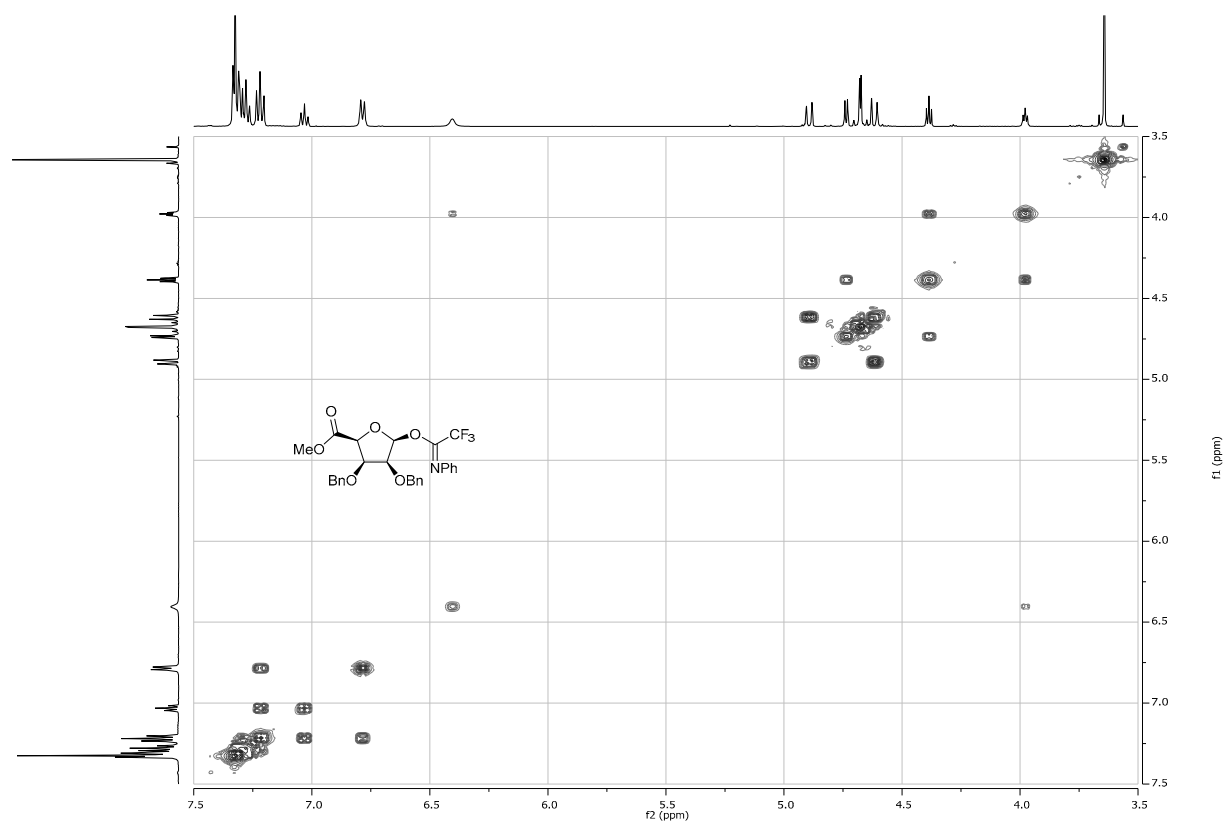

$^1\text{H}$ - $^{13}\text{C}$  HSQC of compound **3 $\beta$**

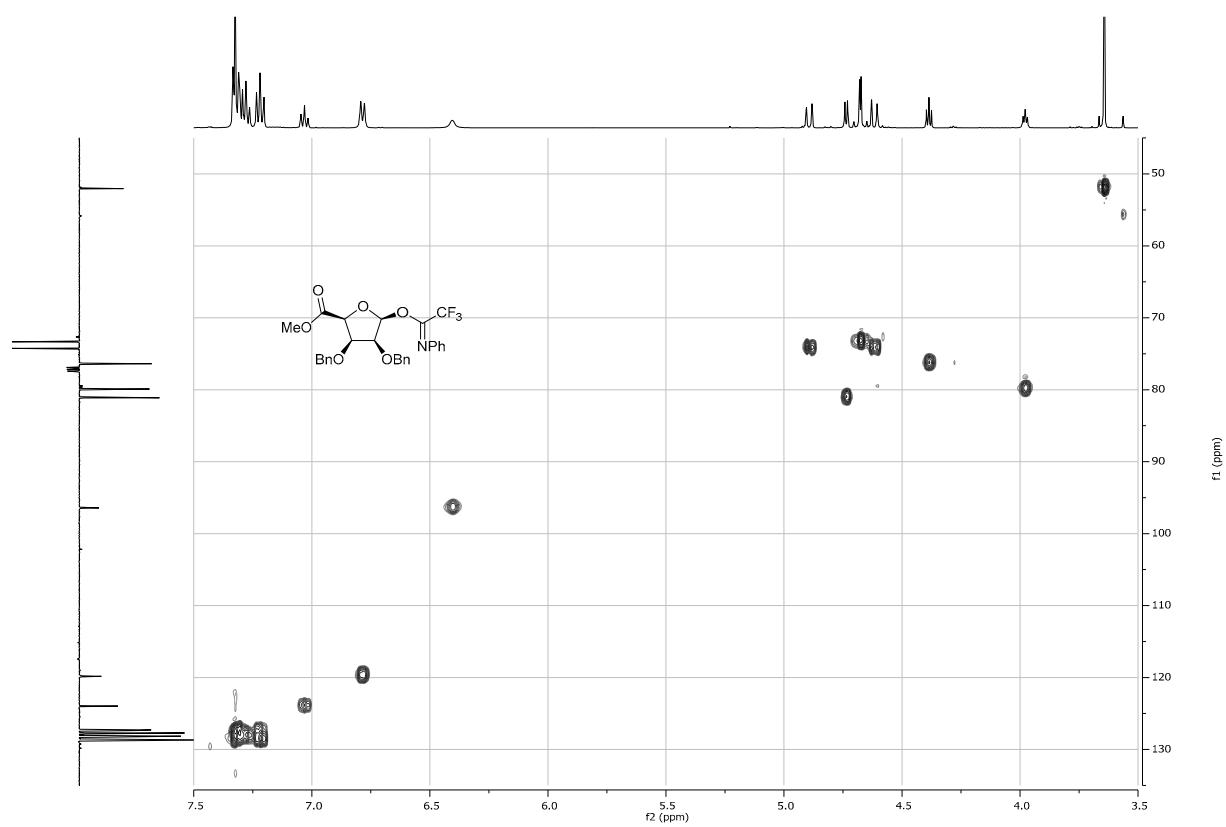

Methyl (2,3-di-O-benzyl-1-O-(*N*-[phenyl]trifluoroacetimidoyl)- $\beta$ -D-xylofuranosyl uronate) (**4 $\alpha$** ) [*T* = 323 K]

$^1\text{H}$  NMR, 500 MHz,  $\text{CDCl}_3$  of compound **4 $\alpha$**

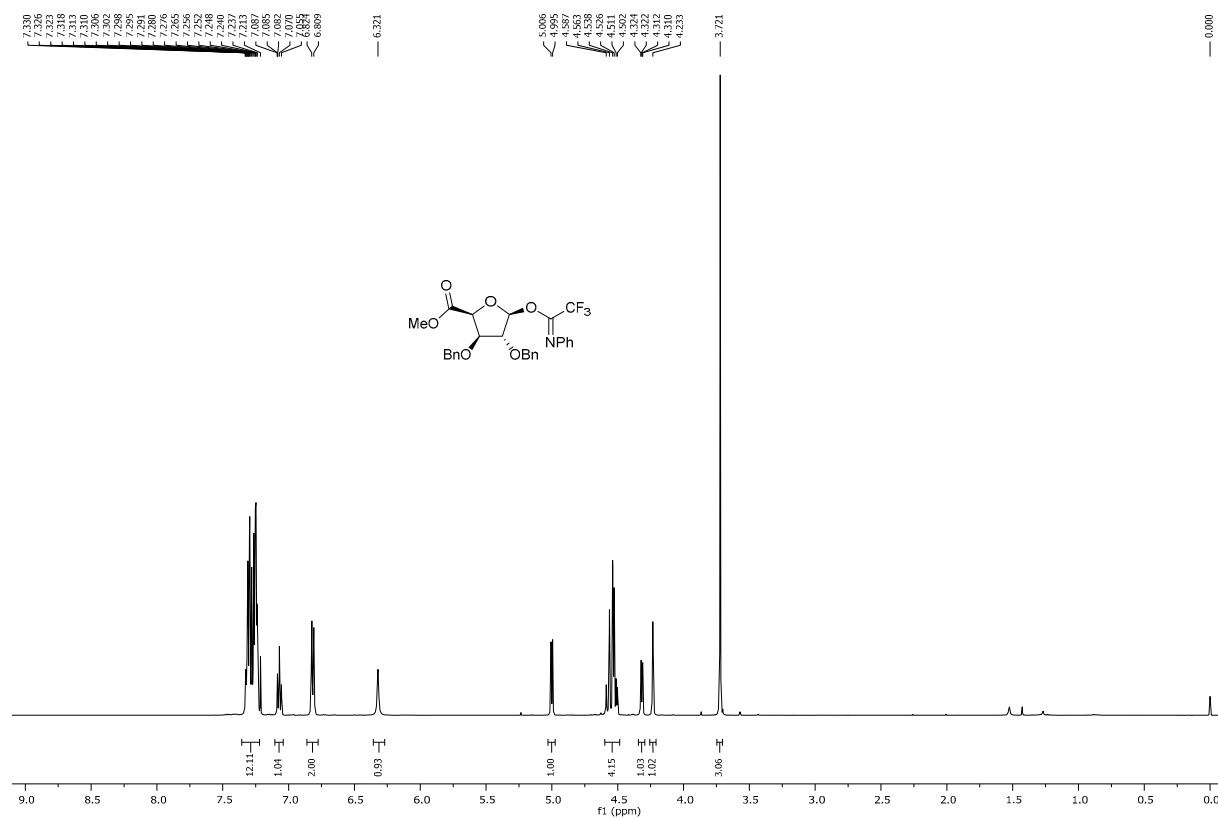

$^{13}\text{C}$ -APT NMR, 126 MHz,  $\text{CDCl}_3$  of compound **4 $\alpha$**

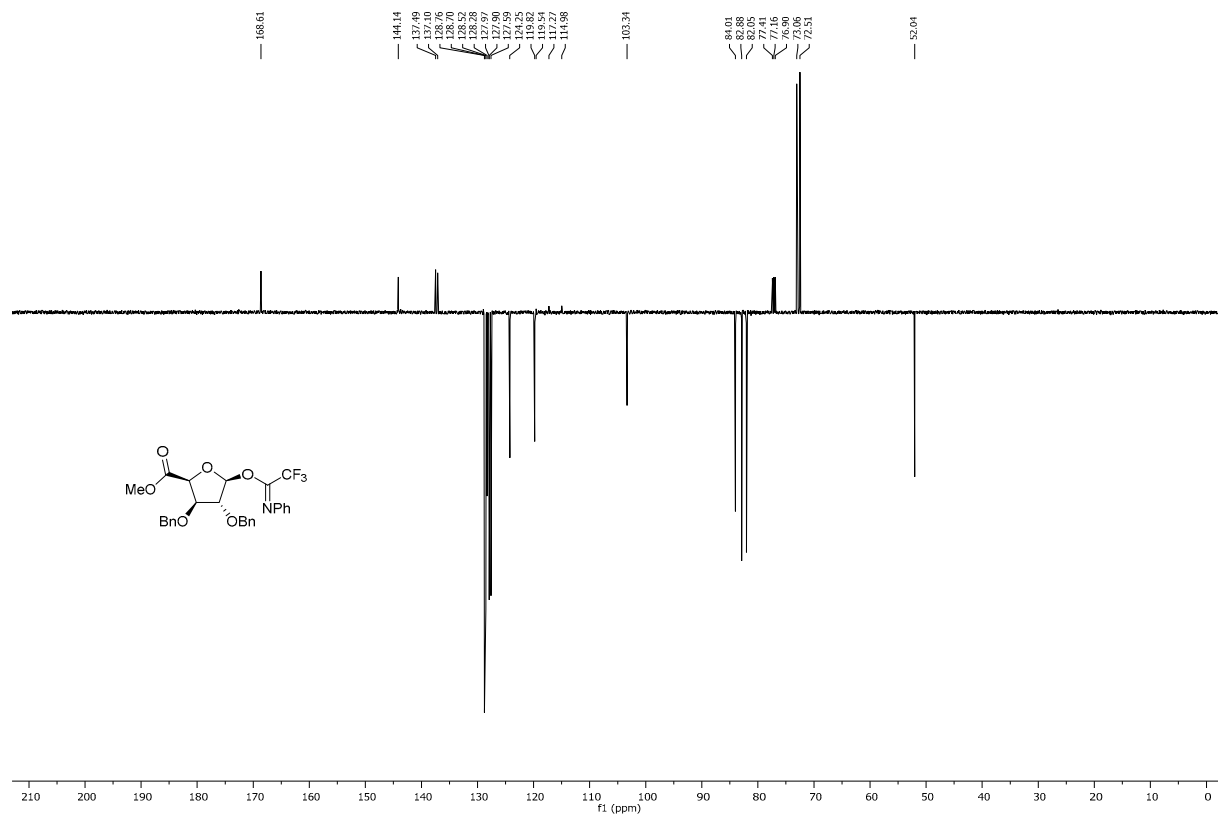

$^1\text{H}$ - $^1\text{H}$  COSY of compound **4a**

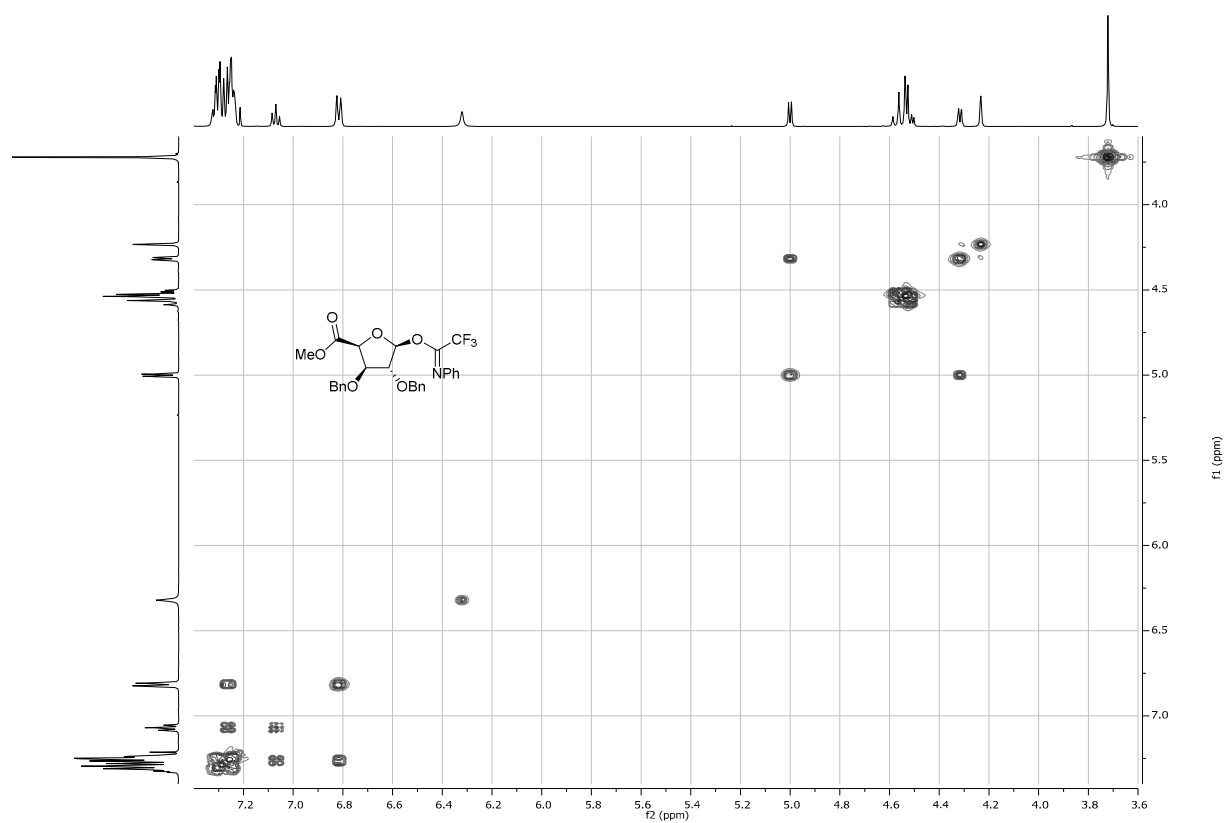

$^1\text{H}$ - $^{13}\text{C}$  HSQC of compound **4a**

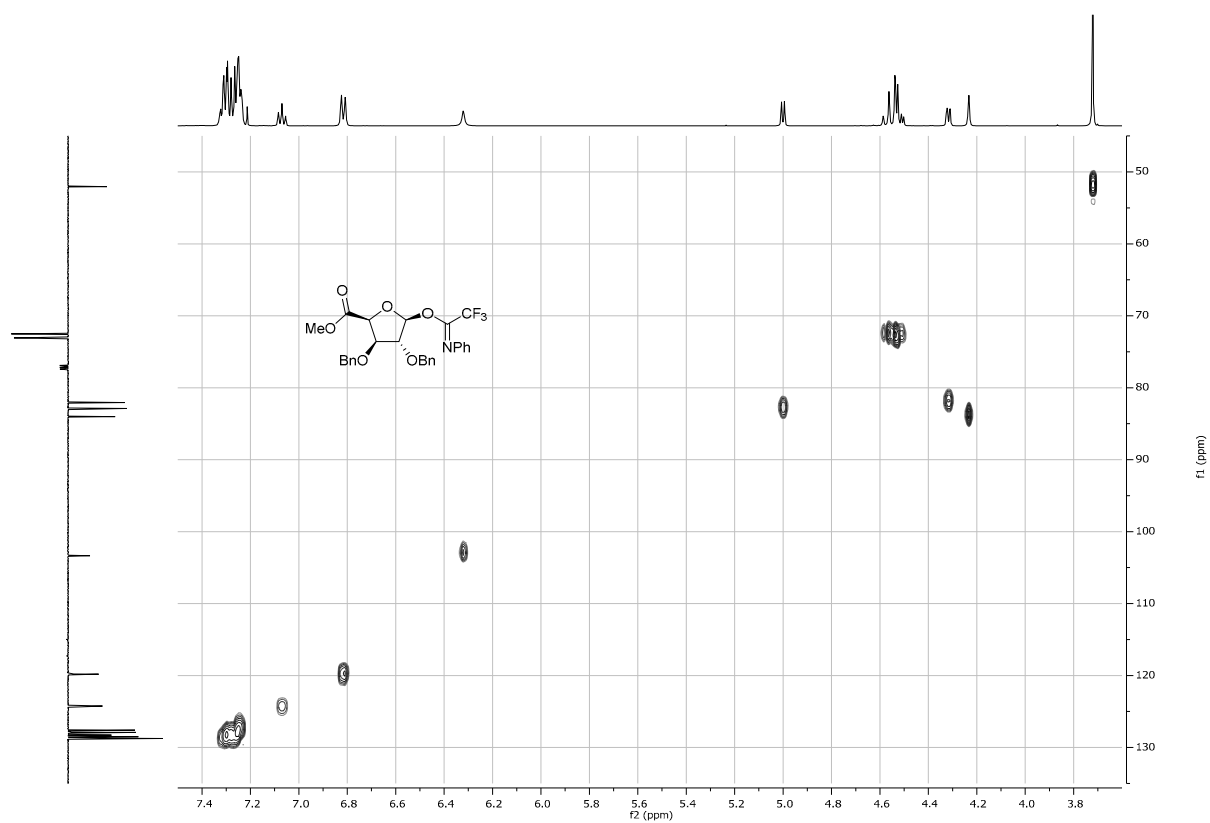

2-azido-3,5-di-O-benzyl-2-deoxy-1-O-(*N*-[phenyl]trifluoroacetimidoyl)- $\alpha$ -D-ribofuranoside (**5 $\alpha$** ) [*T* = 323 K]

$^1\text{H}$  NMR, 500 MHz,  $\text{CDCl}_3$  of compound **5 $\alpha$**

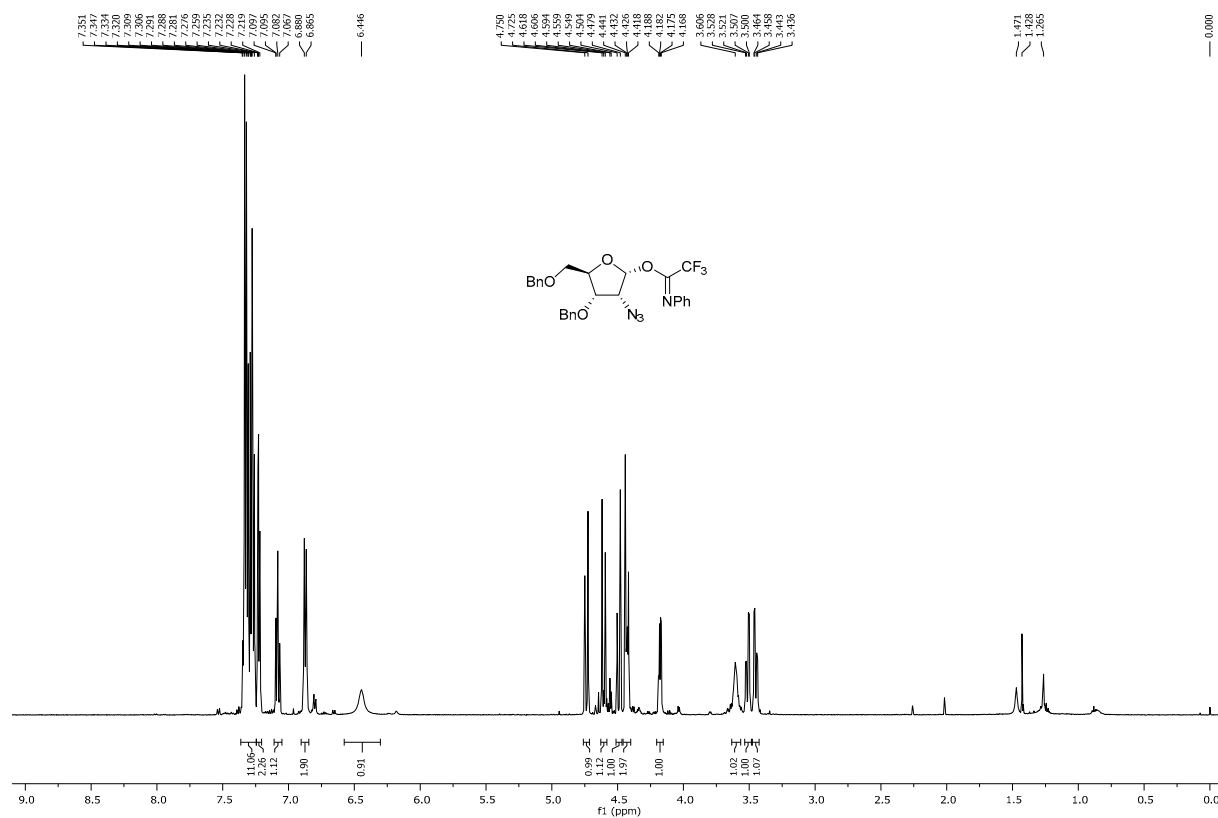

$^{13}\text{C}$ -APT NMR, 126 MHz,  $\text{CDCl}_3$  of compound **5 $\alpha$**

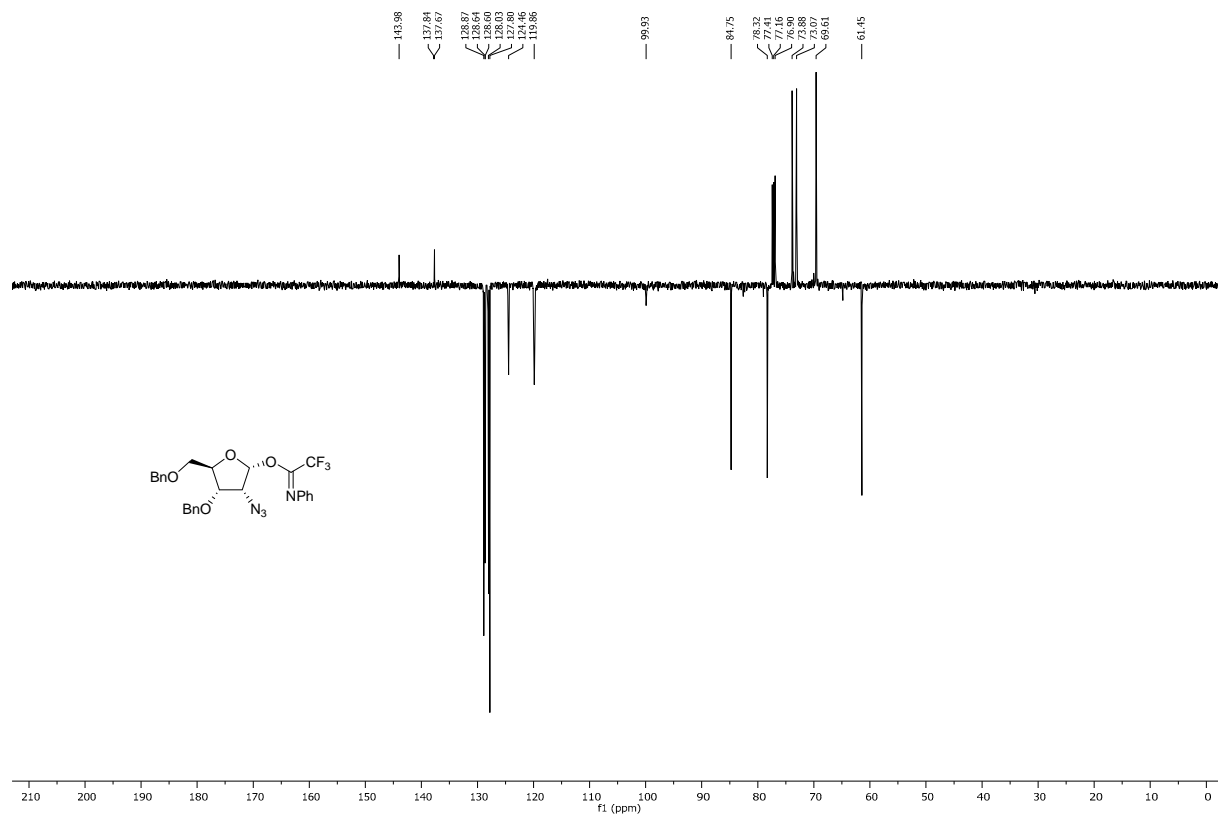

$^1\text{H}$ - $^1\text{H}$  COSY of compound **5 $\alpha$**

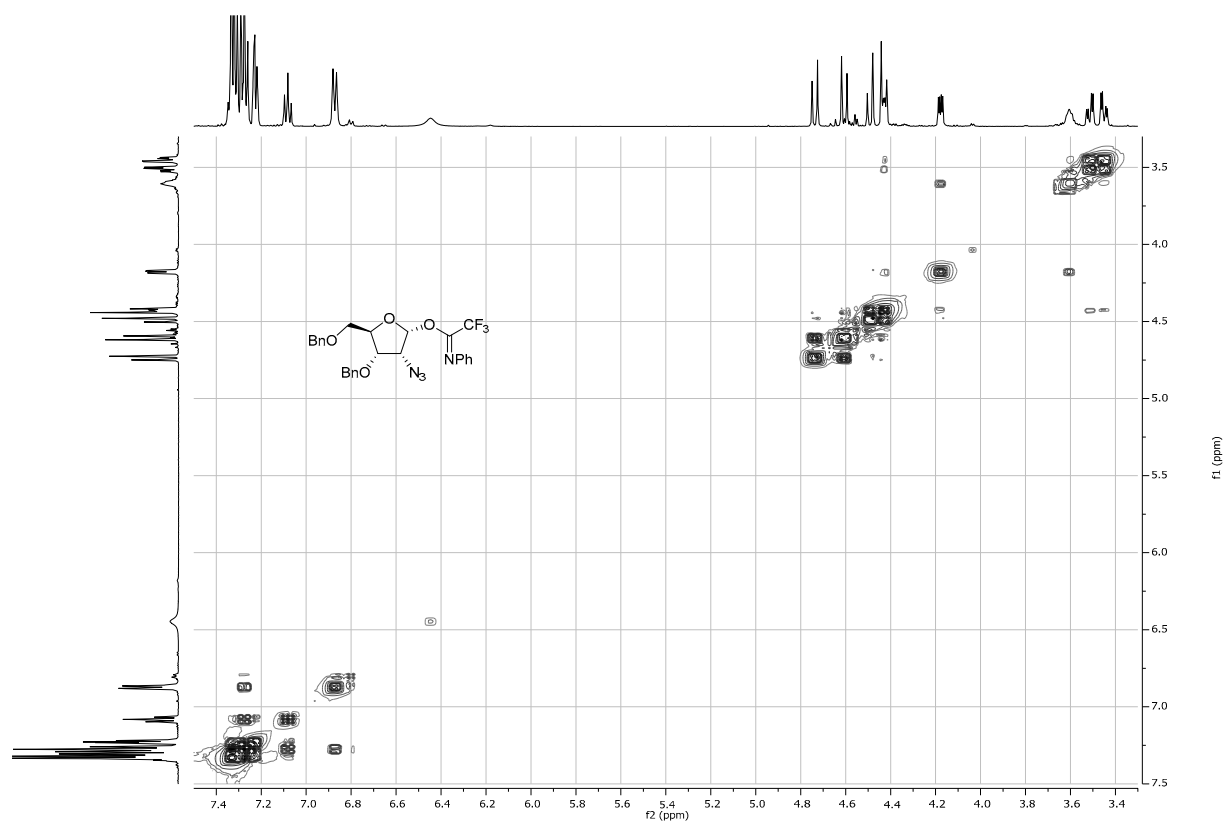

$^1\text{H}$ - $^{13}\text{C}$  HSQC of compound **5 $\alpha$**

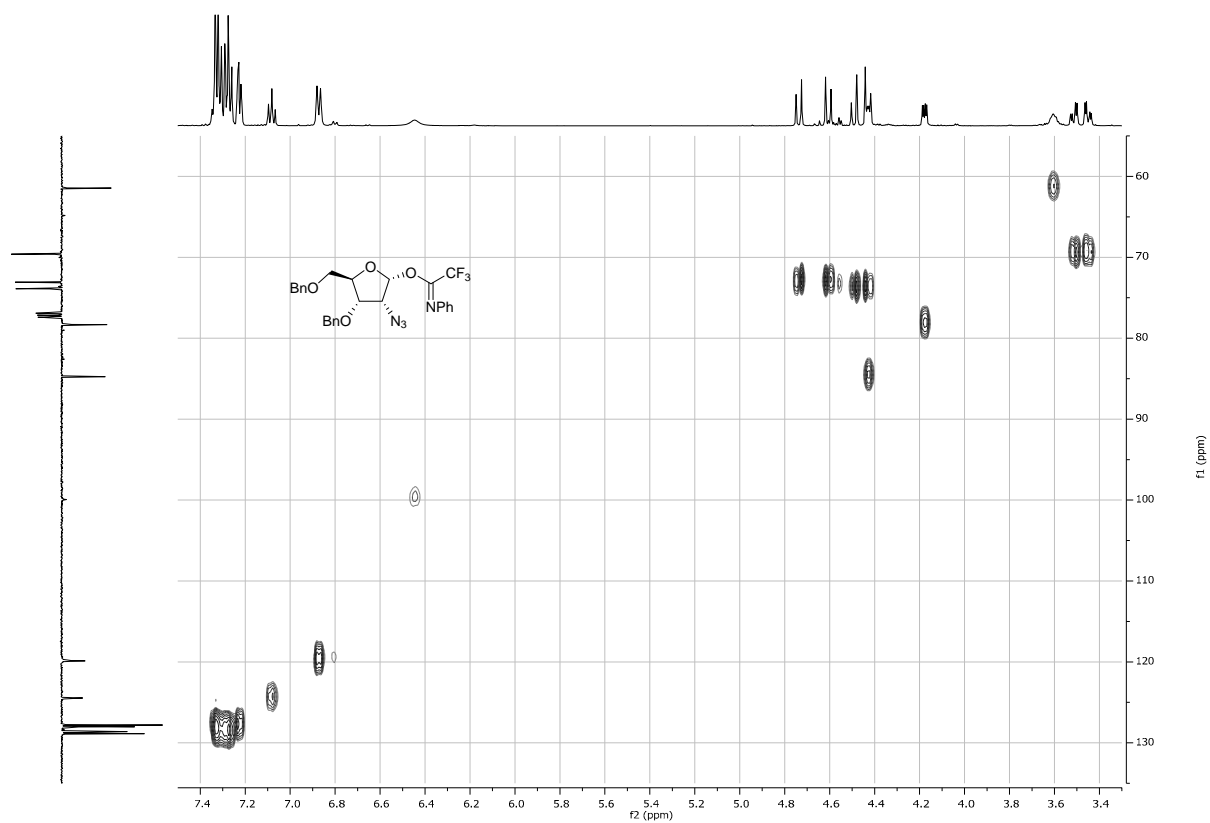



2-azido-3,5-di-O-benzyl-2-deoxy-1-O-(*N*-[phenyl]trifluoroacetimidoyl)- $\beta$ -D-ribofuranoside (**5 $\beta$** ) [*T* = 323 K]

$^1\text{H}$  NMR, 500 MHz,  $\text{CDCl}_3$  of compound **5 $\beta$**

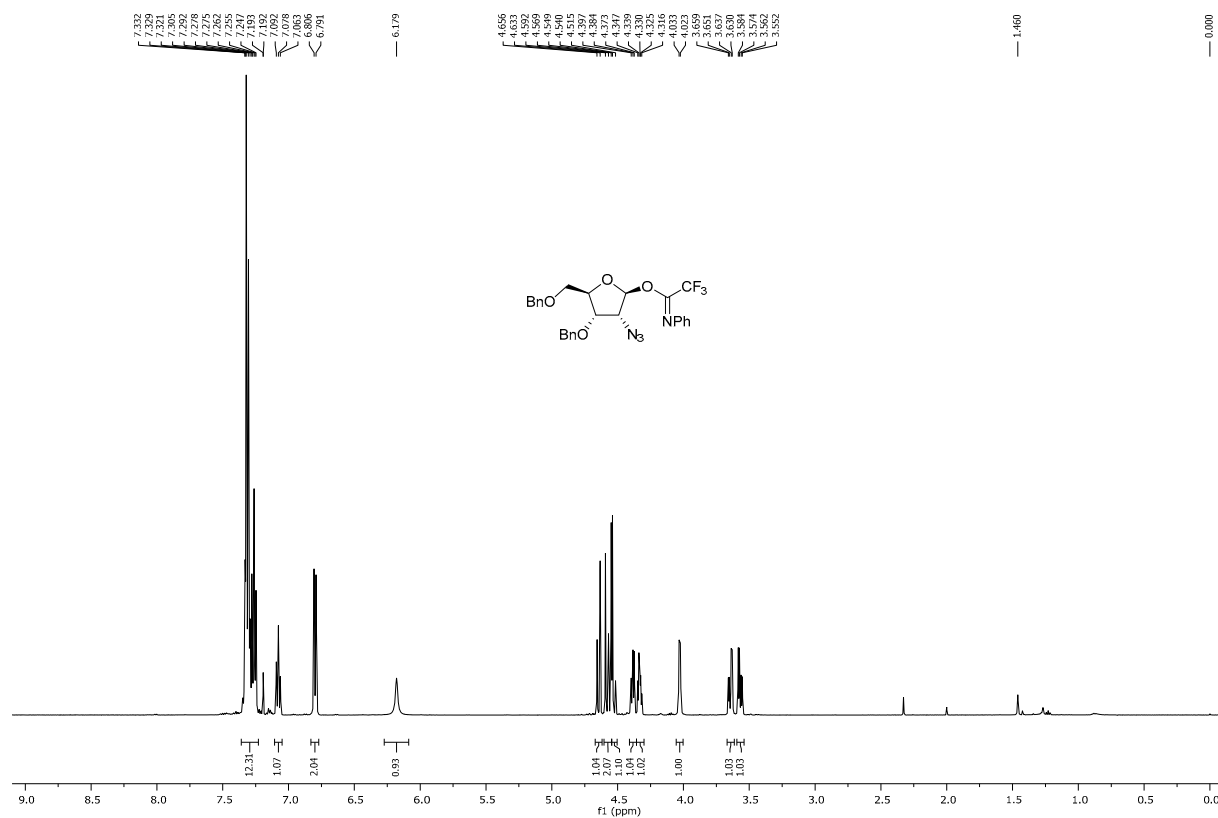

$^{13}\text{C}$ -APT NMR, 126 MHz,  $\text{CDCl}_3$  of compound **5 $\beta$**

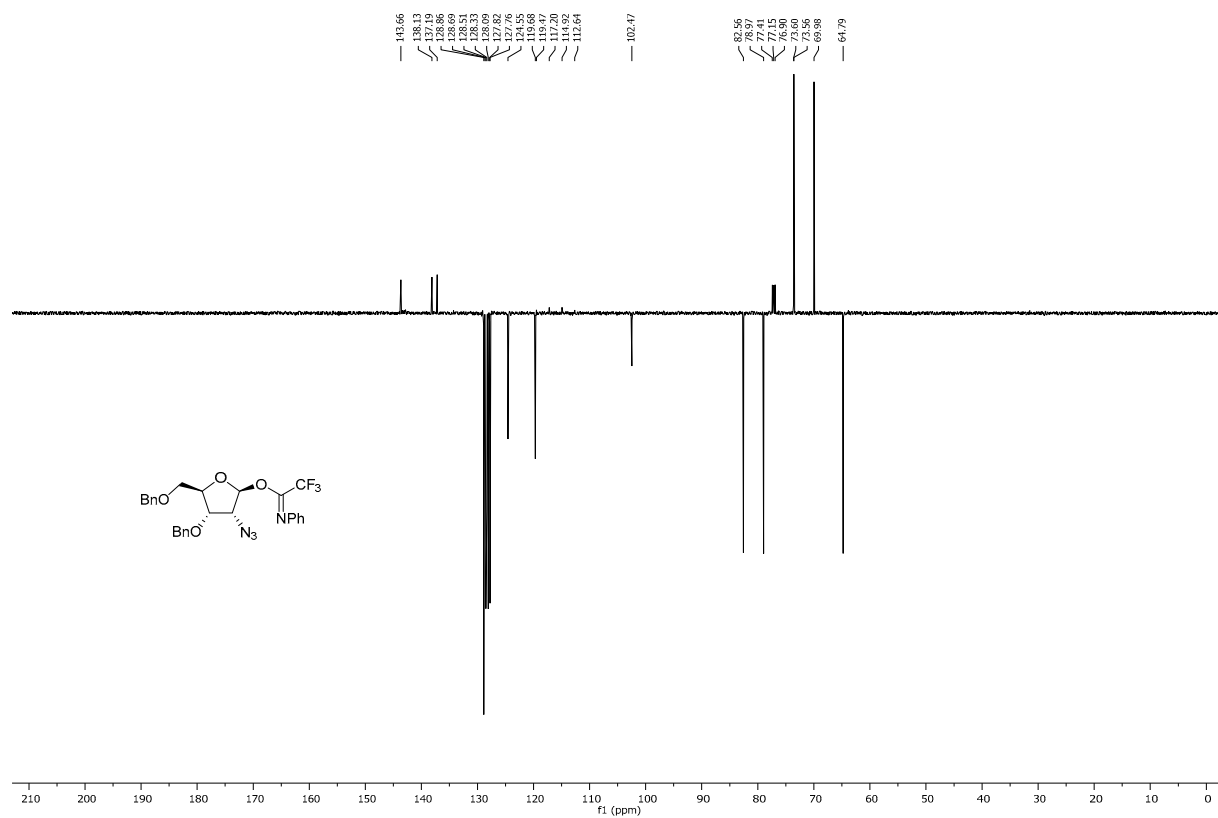

$^1\text{H}$ - $^1\text{H}$  COSY of compound **5 $\beta$**

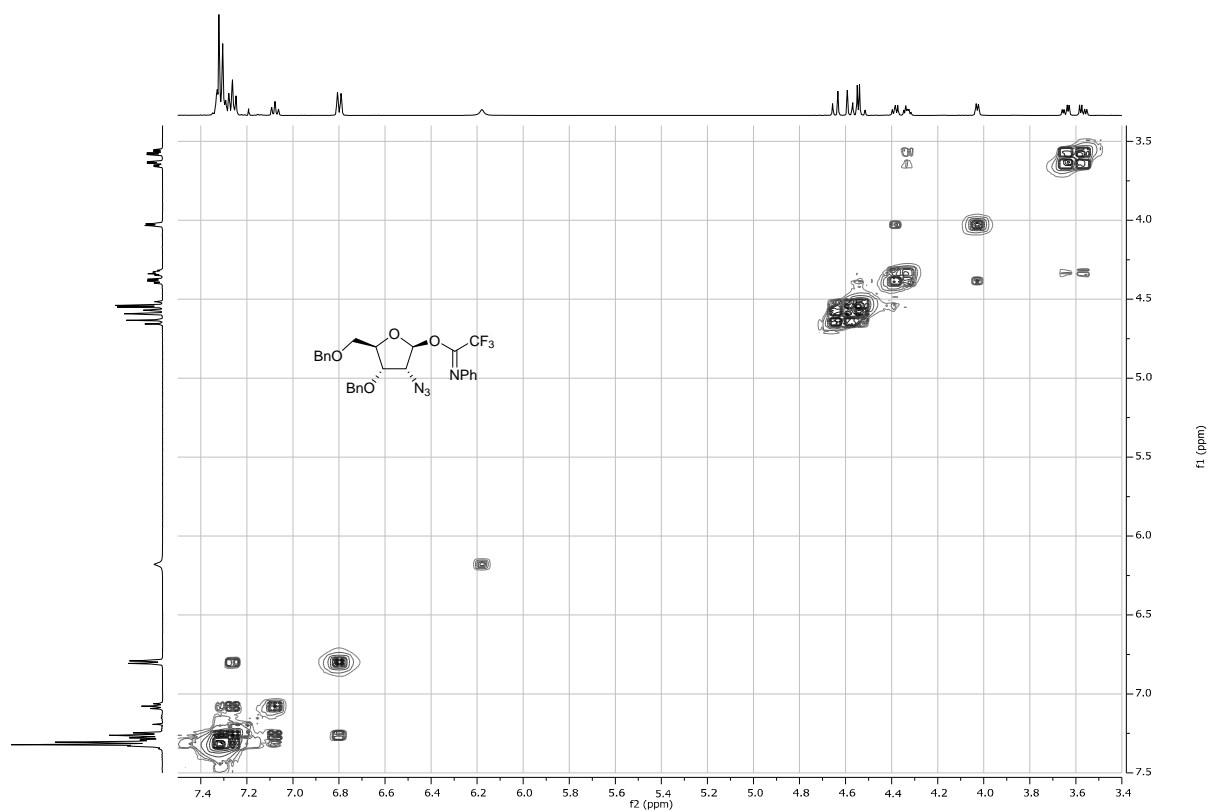

$^1\text{H}$ - $^{13}\text{C}$  HSQC of compound **5 $\beta$**

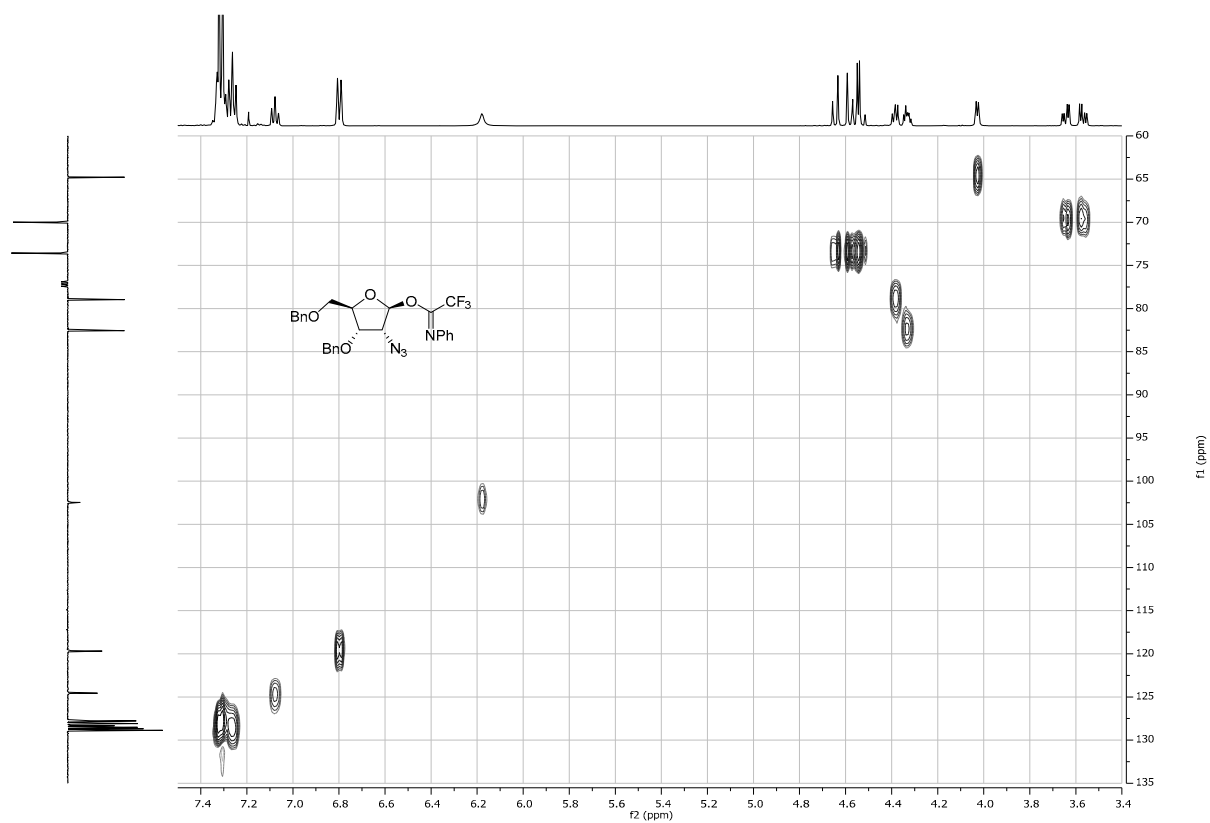

2-azido-3,5-di-O-benzyl-2-deoxy-1-O-(*N*-[phenyl]trifluoroacetimidoyl)- $\alpha$ -D-arabinofuranoside (**6a**) [*T* = 323 K]

$^1\text{H}$  NMR, 500 MHz,  $\text{CDCl}_3$  of compound **6a**

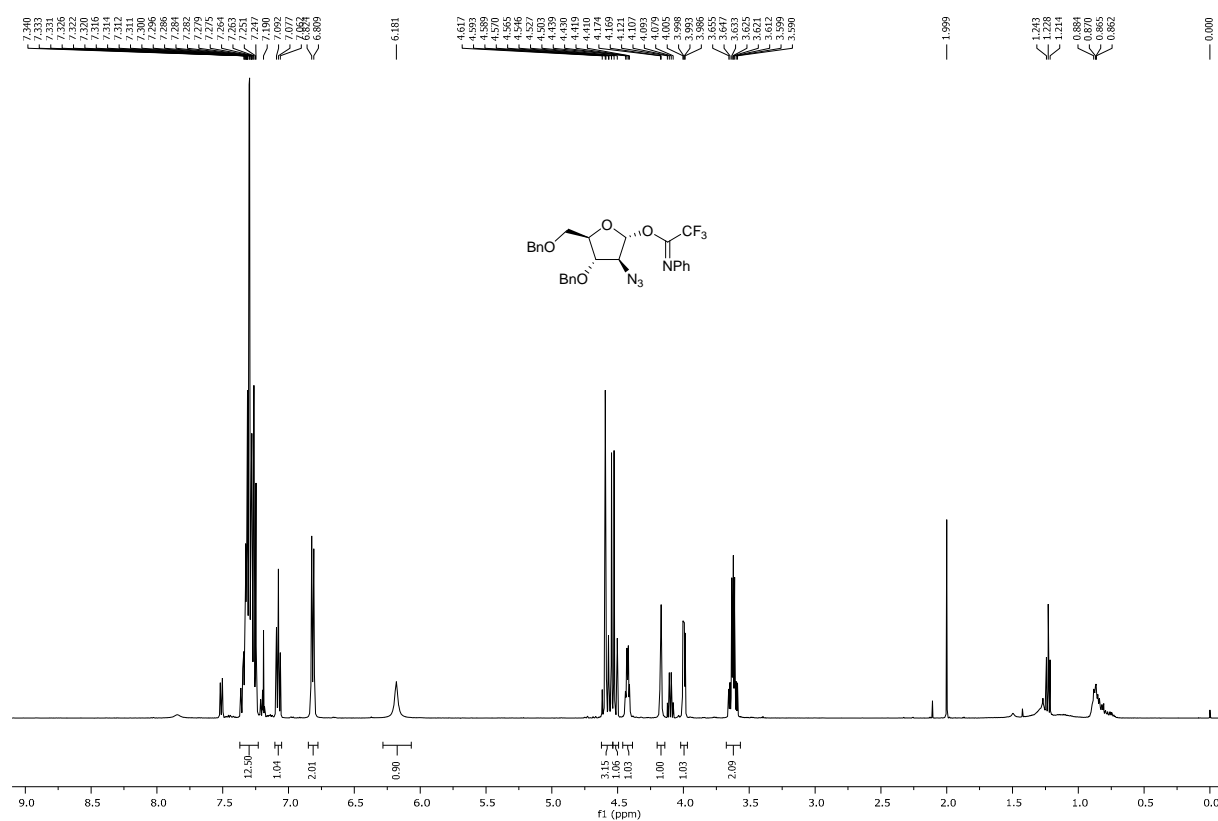

$^{13}\text{C}$ -APT NMR, 126 MHz,  $\text{CDCl}_3$  of compound **6a**

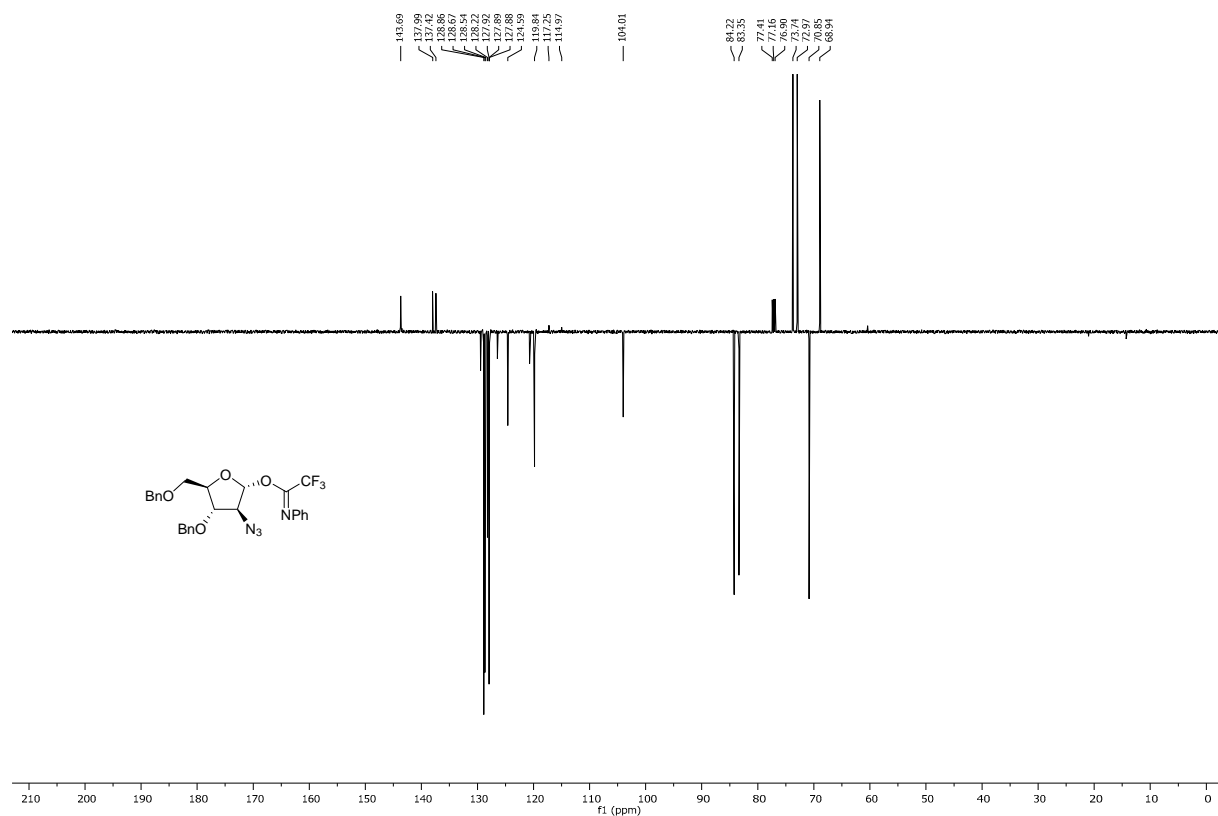

$^1\text{H}$ - $^1\text{H}$  COSY of compound **6 $\alpha$**

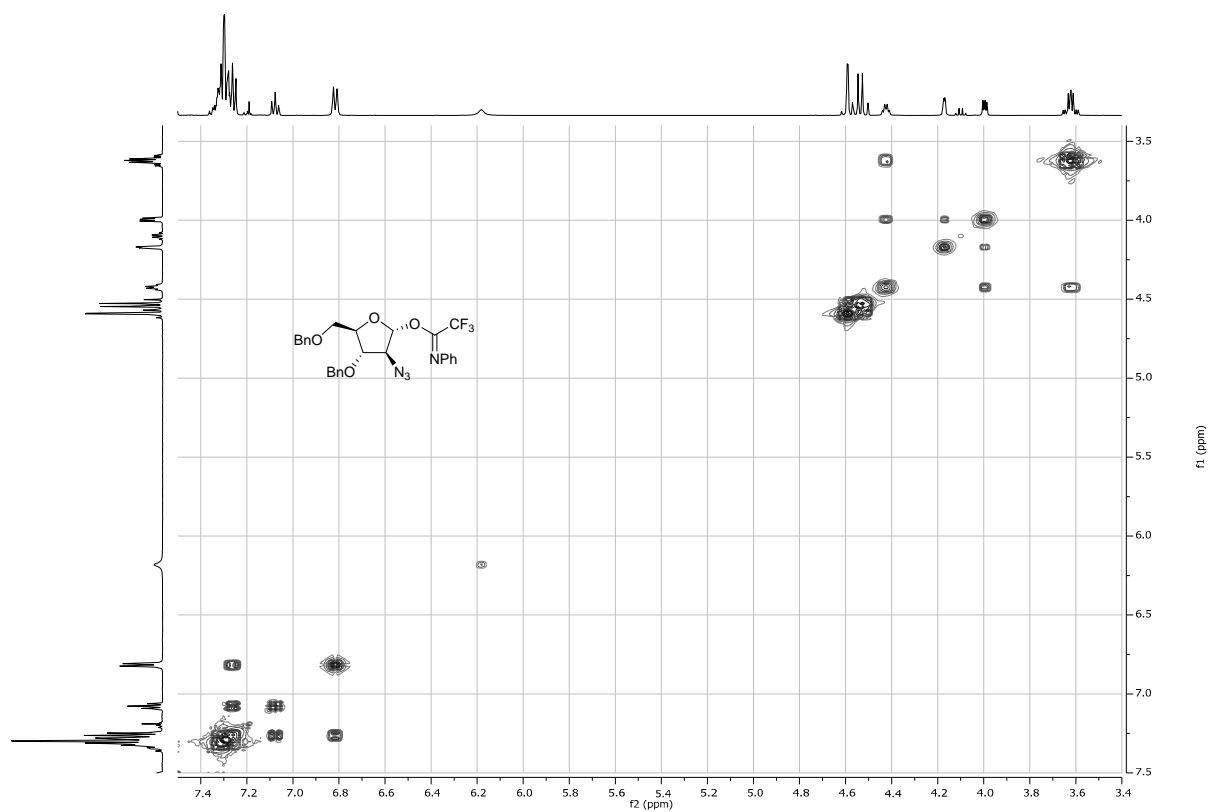

$^1\text{H}$ - $^{13}\text{C}$  HSQC of compound **6 $\alpha$**

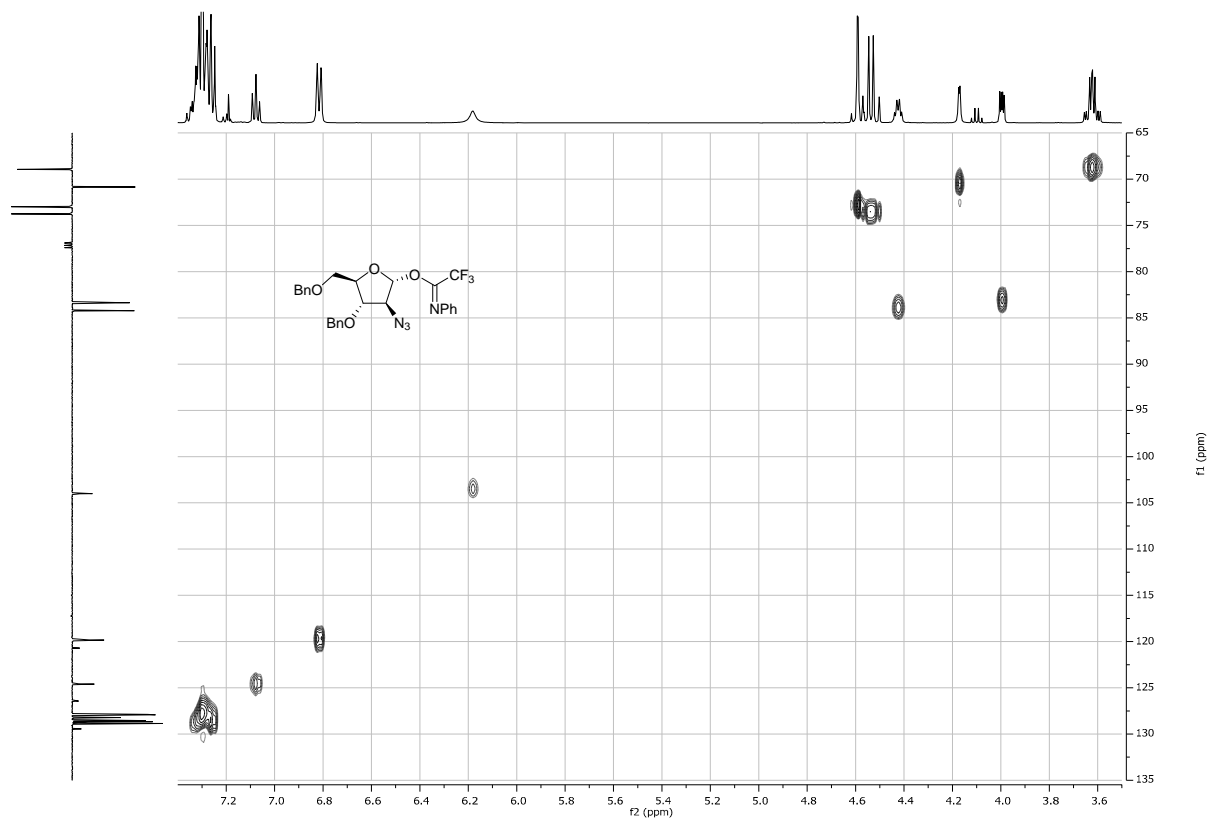

2-azido-3,5-di-O-benzyl-2-deoxy-1-O-(*N*-[phenyl]trifluoroacetimidoyl)- $\beta$ -D-arabinofuranoside (**6 $\beta$** ) [*T* = 323 K]

$^1\text{H}$  NMR, 500 MHz,  $\text{CDCl}_3$  of compound **6 $\beta$**

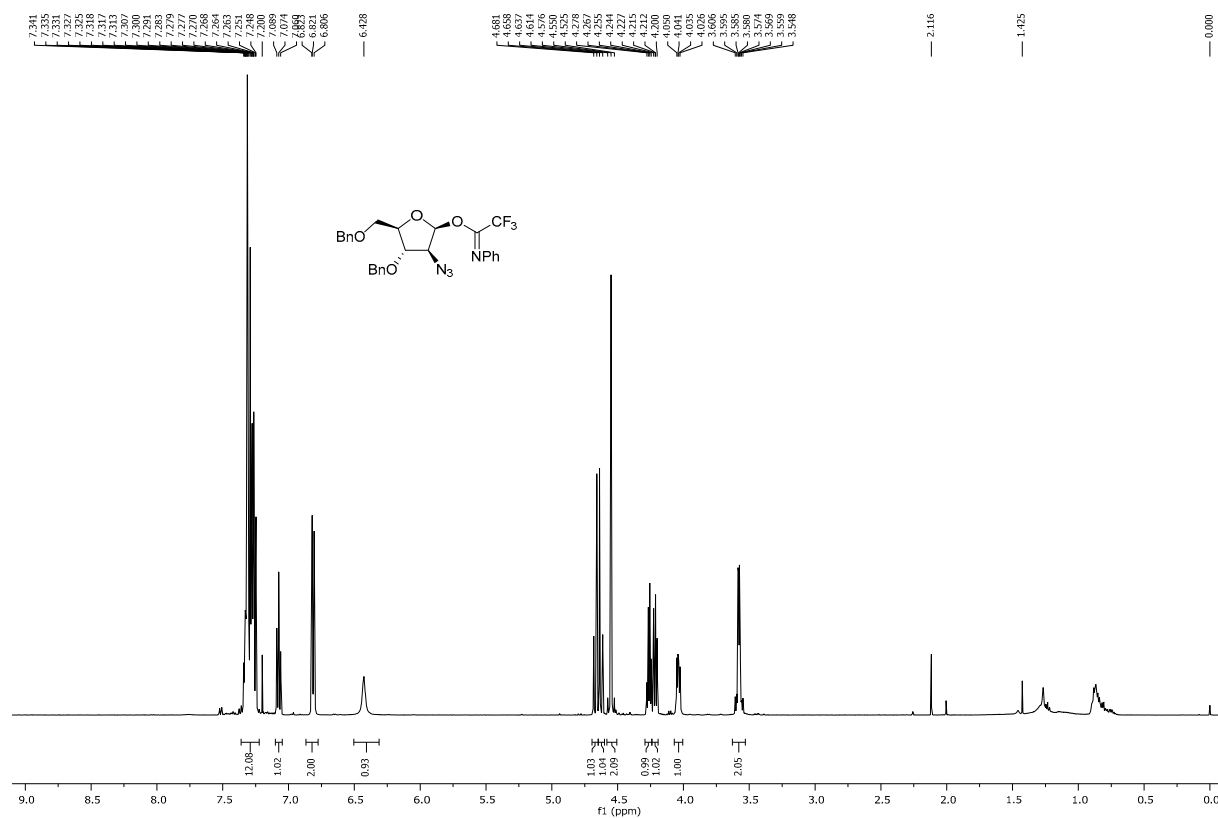

$^{13}\text{C}$ -APT NMR, 126 MHz,  $\text{CDCl}_3$  of compound **6 $\beta$**

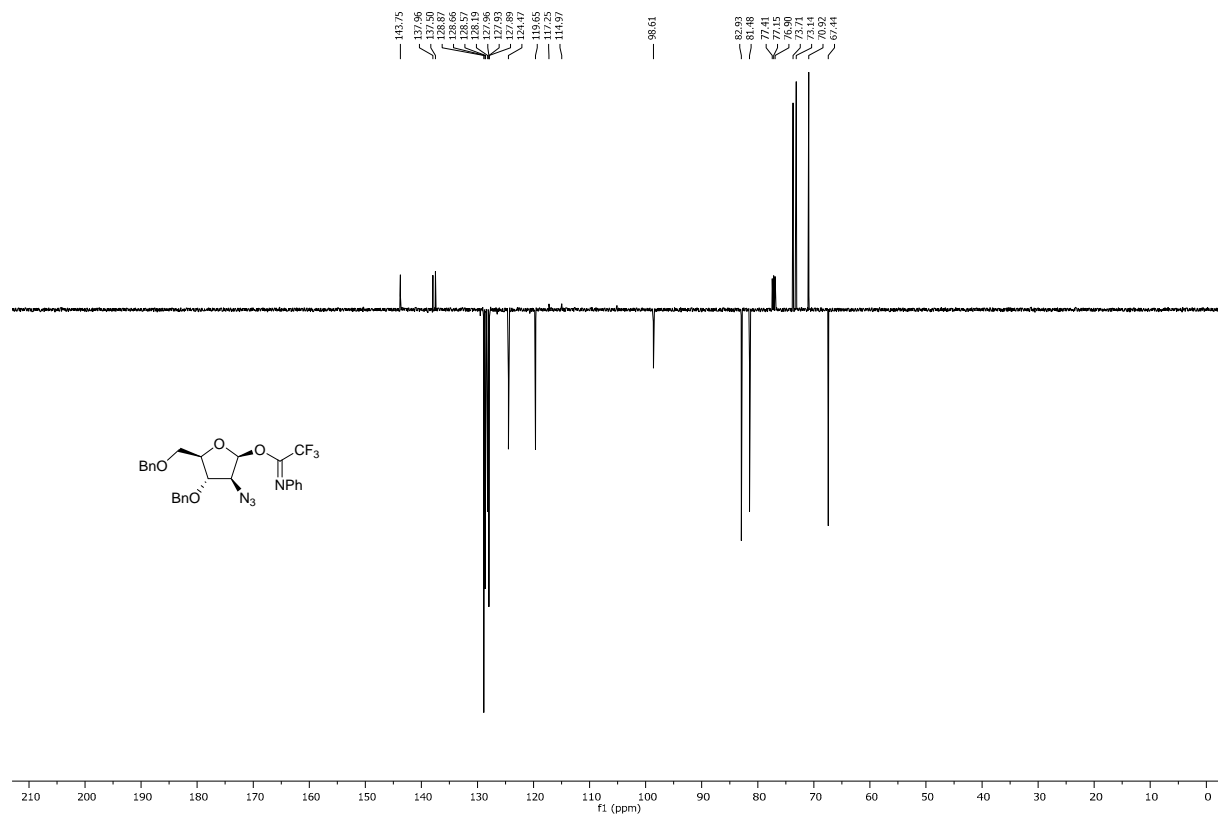

$^1\text{H}$ - $^1\text{H}$  COSY of compound **6 $\beta$**

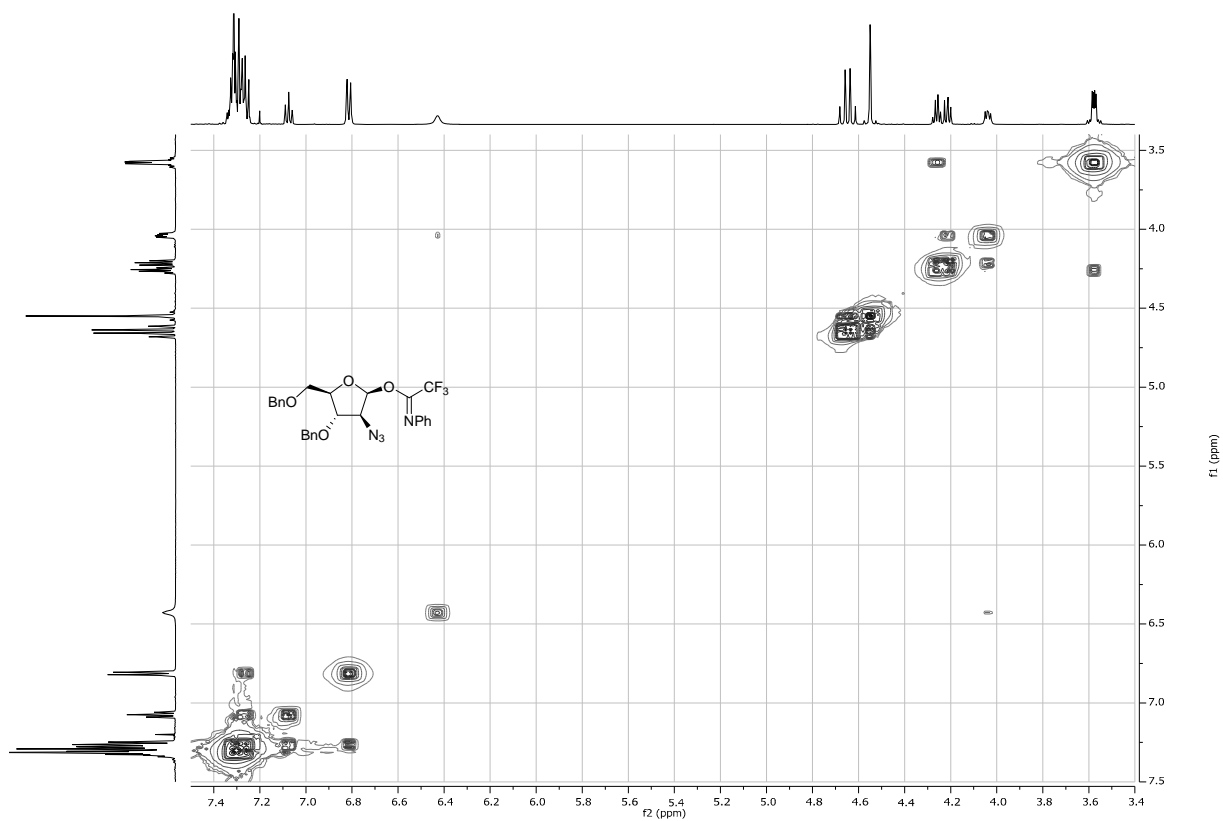

$^1\text{H}$ - $^{13}\text{C}$  HSQC of compound **6 $\beta$**

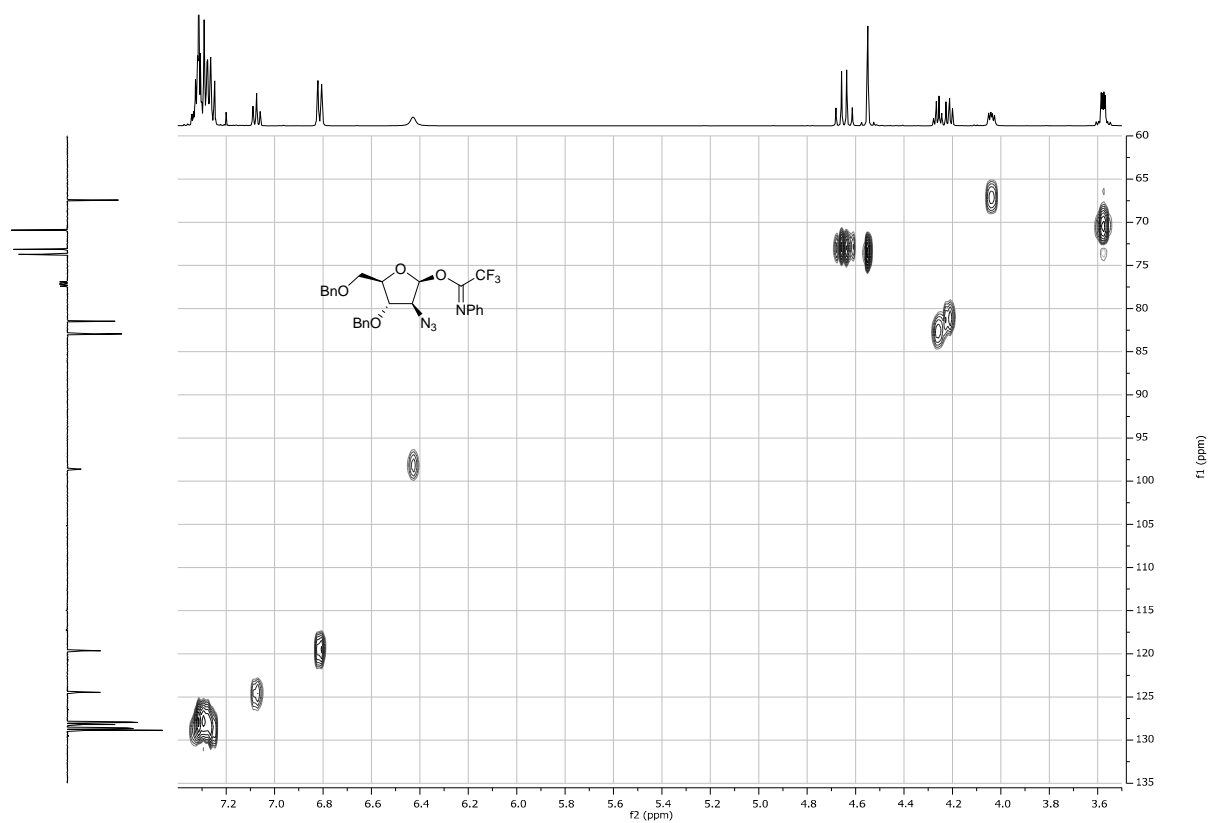

2-azido-3,5-di-O-benzyl-2-deoxy-1-O-(*N*-[phenyl]trifluoroacetimidoyl)- $\alpha$ -D-lyxofuranoside (**7a**) [*T* = 323 K]

$^1\text{H}$  NMR, 500 MHz,  $\text{CDCl}_3$  of compound **7a**

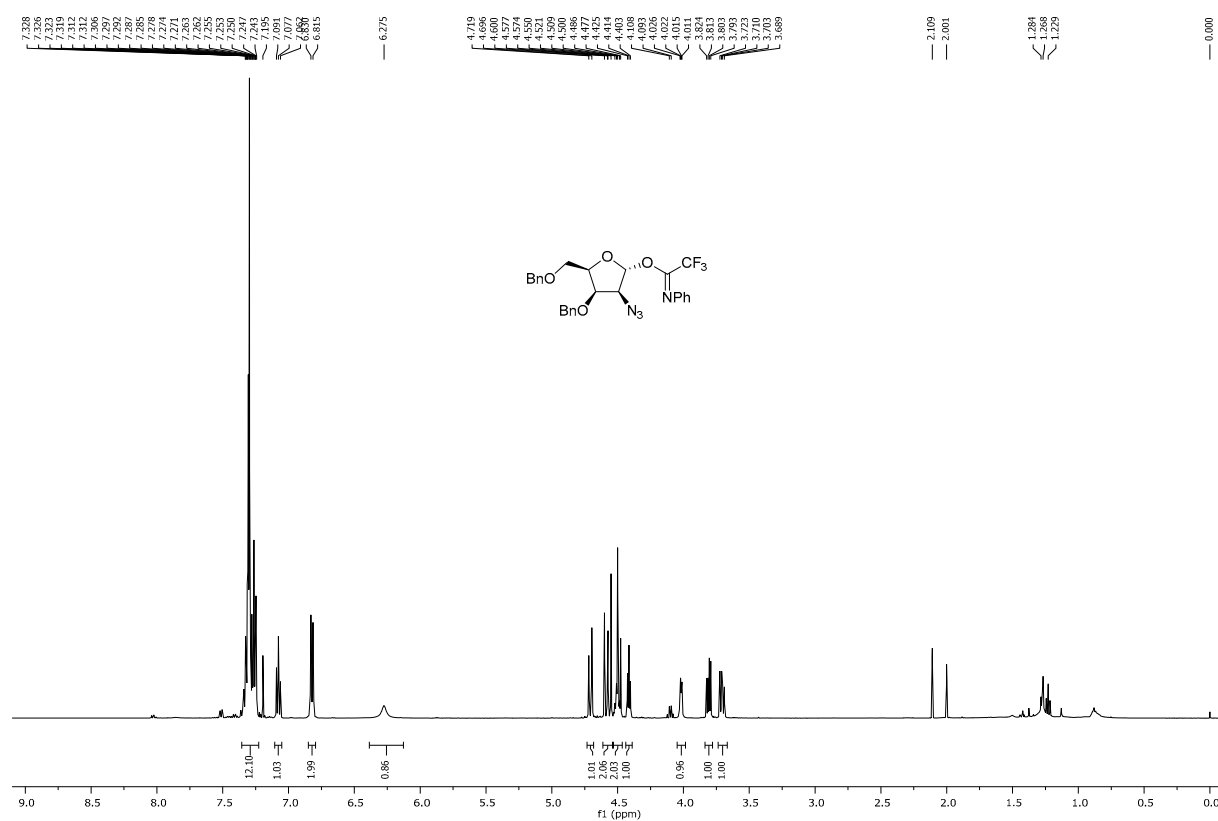

$^{13}\text{C}$ -APT NMR, 126 MHz,  $\text{CDCl}_3$  of compound **7a**

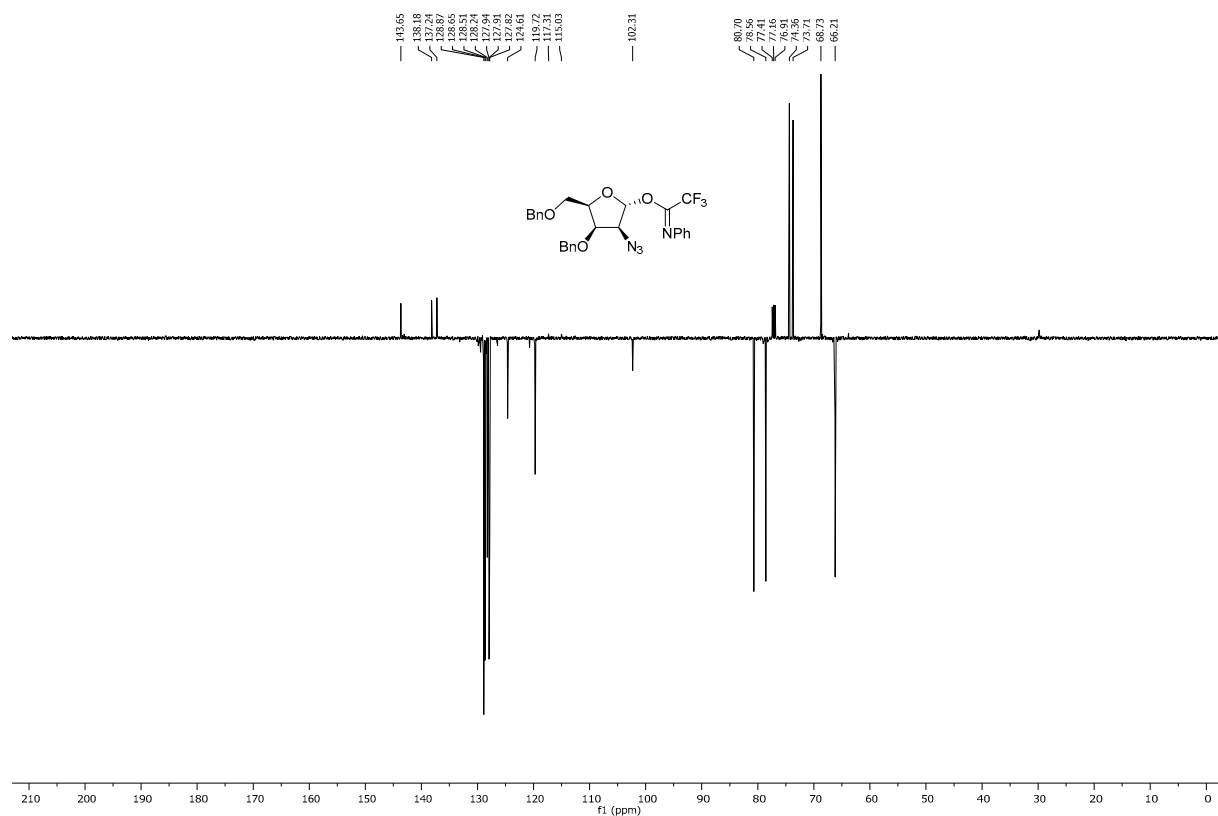

$^1\text{H}$ - $^1\text{H}$  COSY of compound **7 $\alpha$**

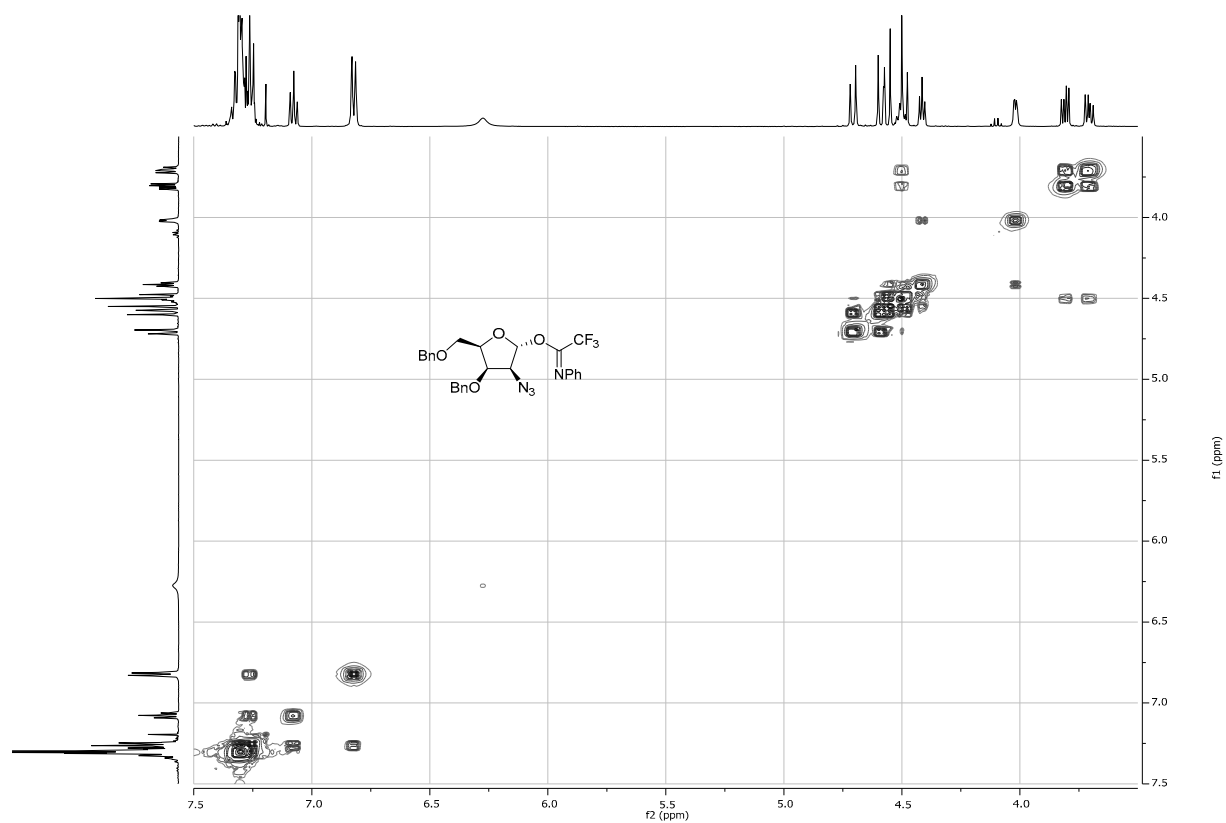

$^1\text{H}$ - $^{13}\text{C}$  HSQC of compound **7 $\alpha$**

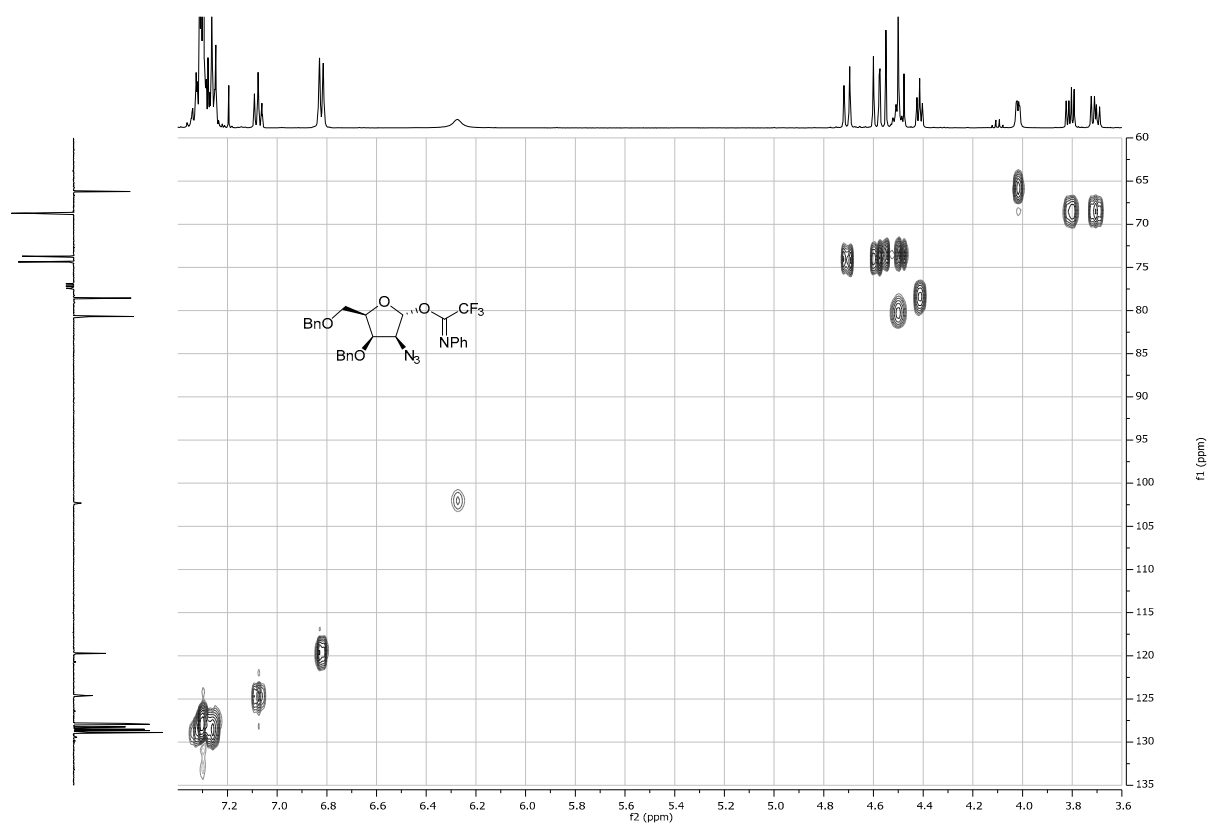



2-azido-3,5-di-O-benzyl-2-deoxy-1-O-(*N*-[phenyl]trifluoroacetimidoyl)- $\beta$ -D-lyxofuranoside (**7 $\beta$** ) [*T* = 323 K]

$^1\text{H}$  NMR, 500 MHz,  $\text{CDCl}_3$  of compound **7 $\beta$**

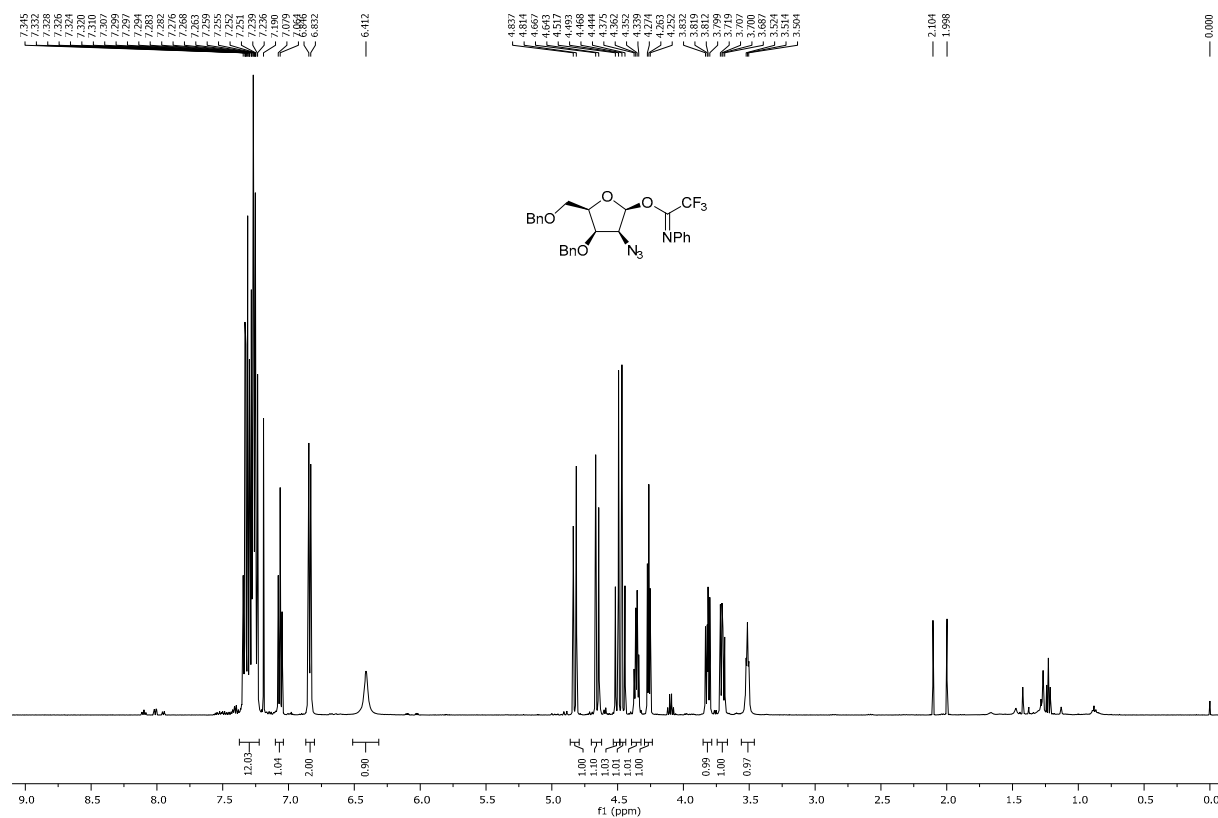

$^{13}\text{C}$ -APT NMR, 126 MHz,  $\text{CDCl}_3$  of compound **7 $\beta$**

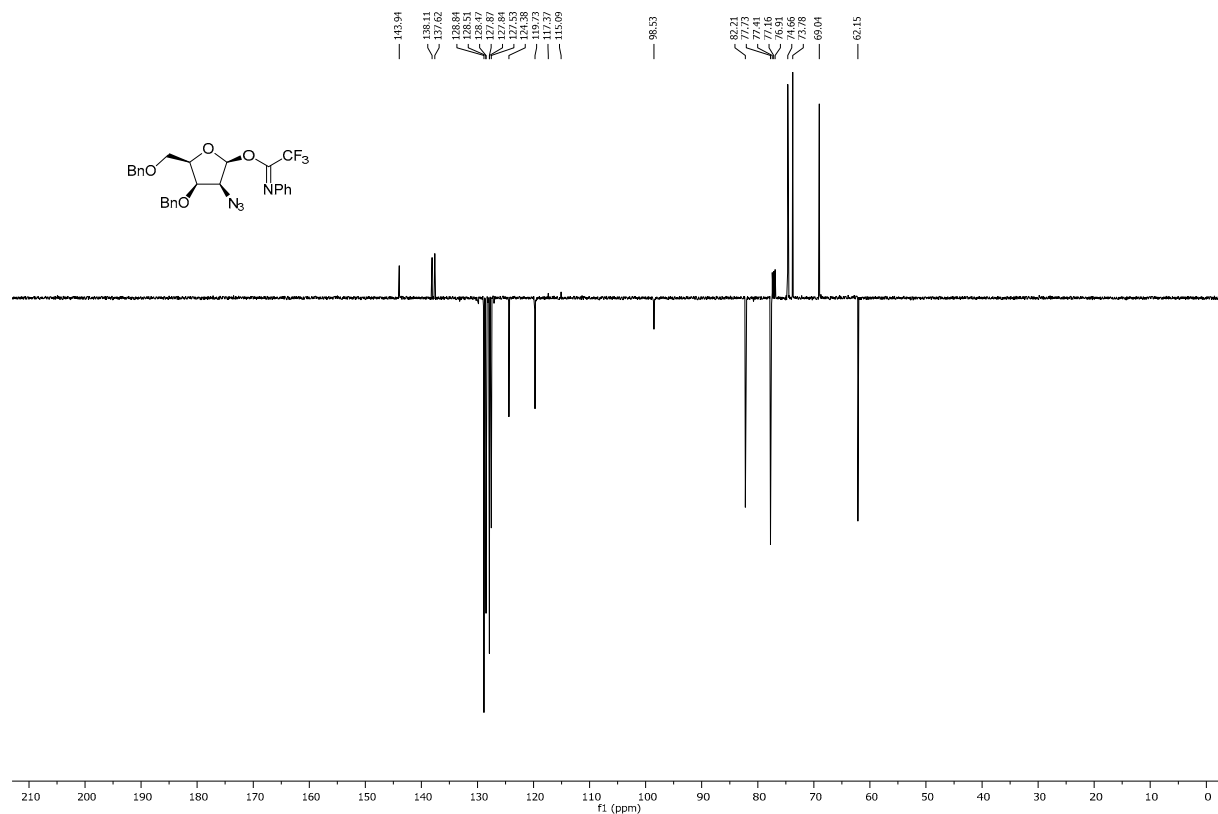

$^1\text{H}$ - $^1\text{H}$  COSY of compound **7b**

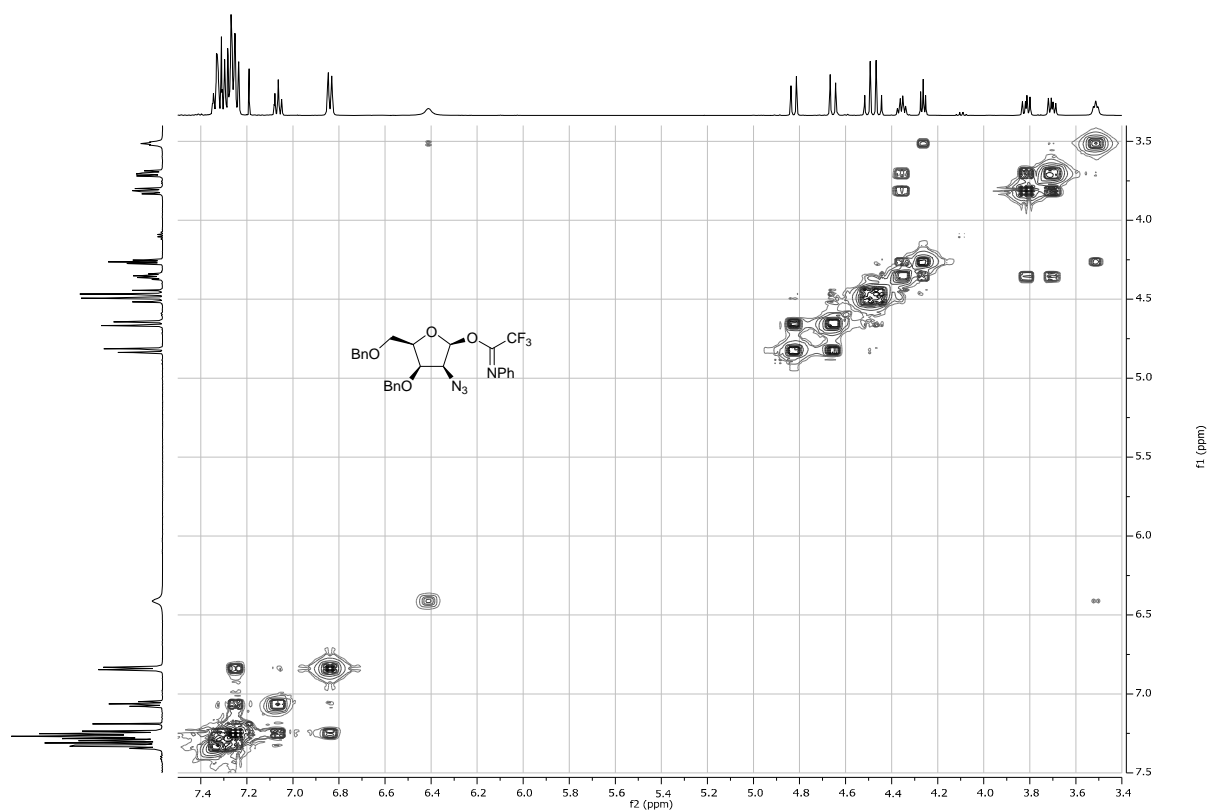

$^1\text{H}$ - $^{13}\text{C}$  HSQC of compound **7b**

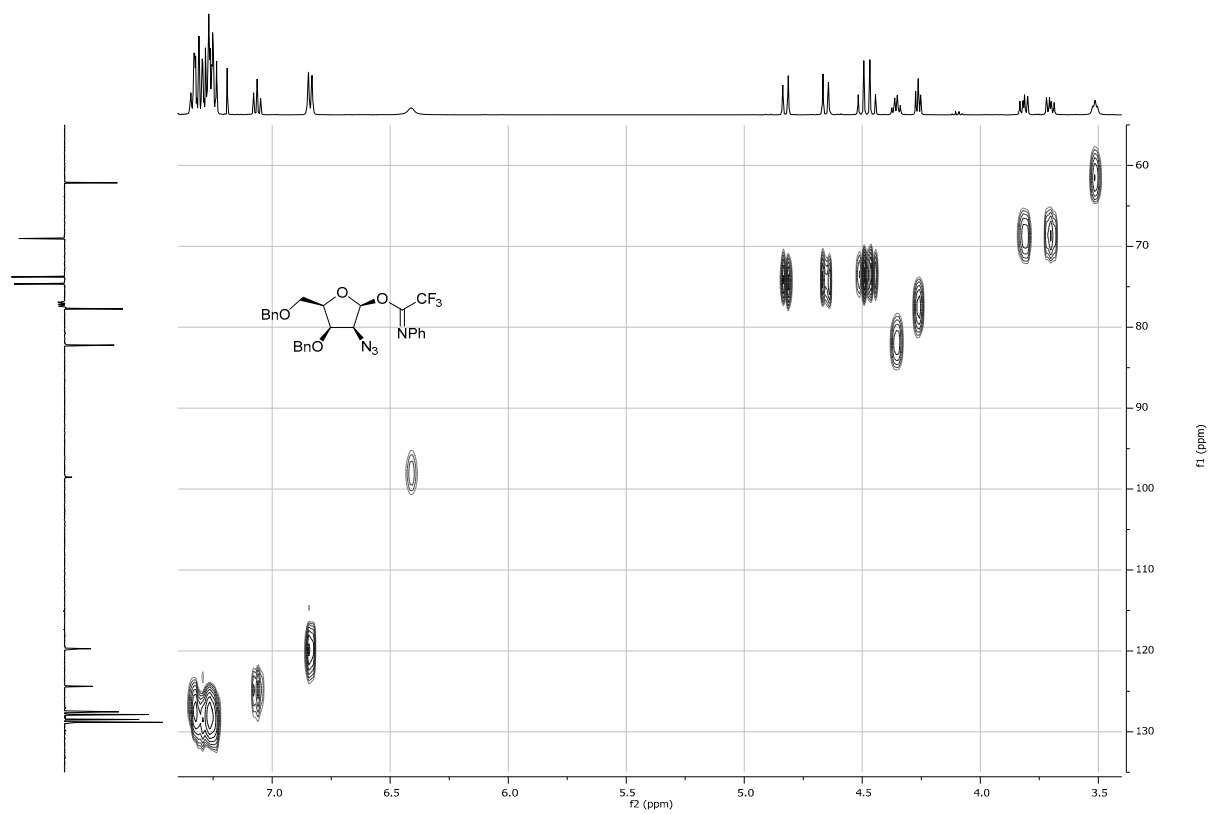

2-azido-3,5-di-O-benzyl-2-deoxy-1-O-(*N*-[phenyl]trifluoroacetimidoyl)- $\alpha/\beta$ -D-xylofuranoside (**8**). [*T* = 323 K]

$^1\text{H}$  NMR, 500 MHz,  $\text{CDCl}_3$  of compound **8**

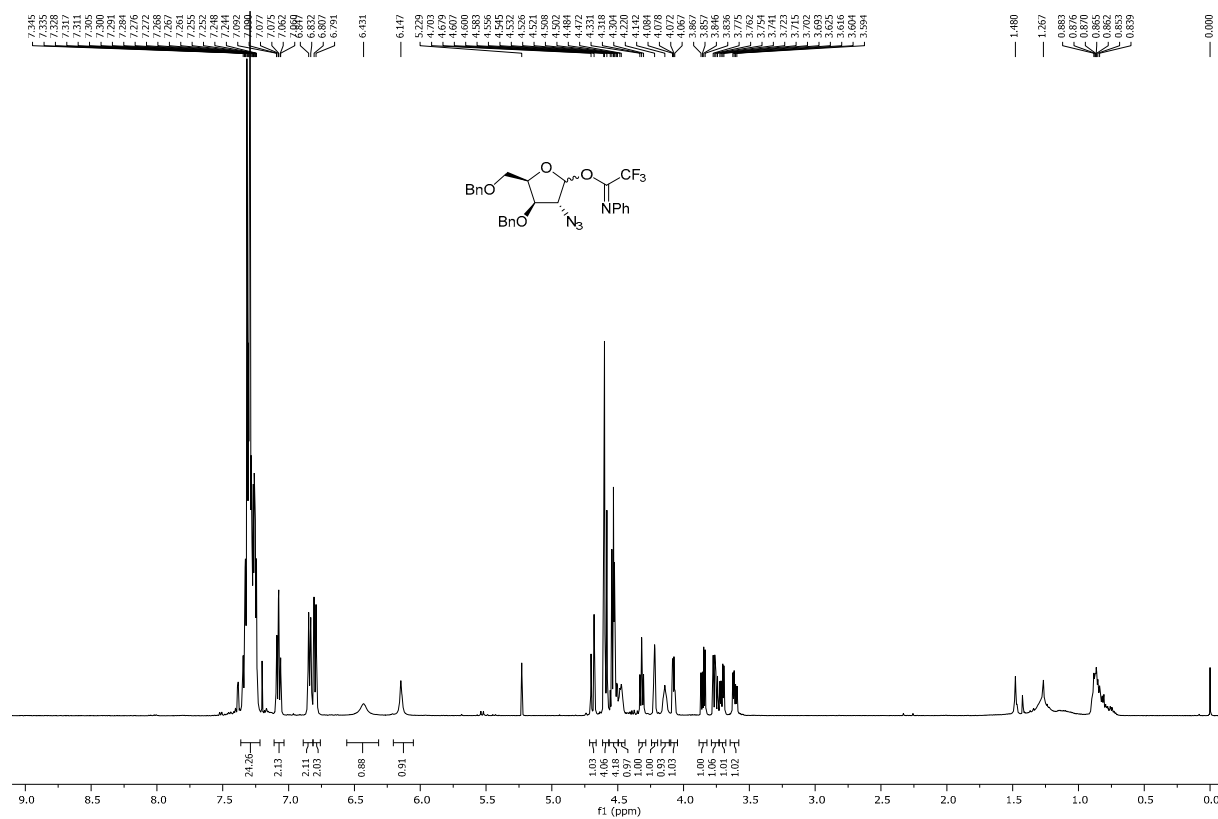

$^{13}\text{C}$ -APT NMR, 126 MHz,  $\text{CDCl}_3$  of compound **8**

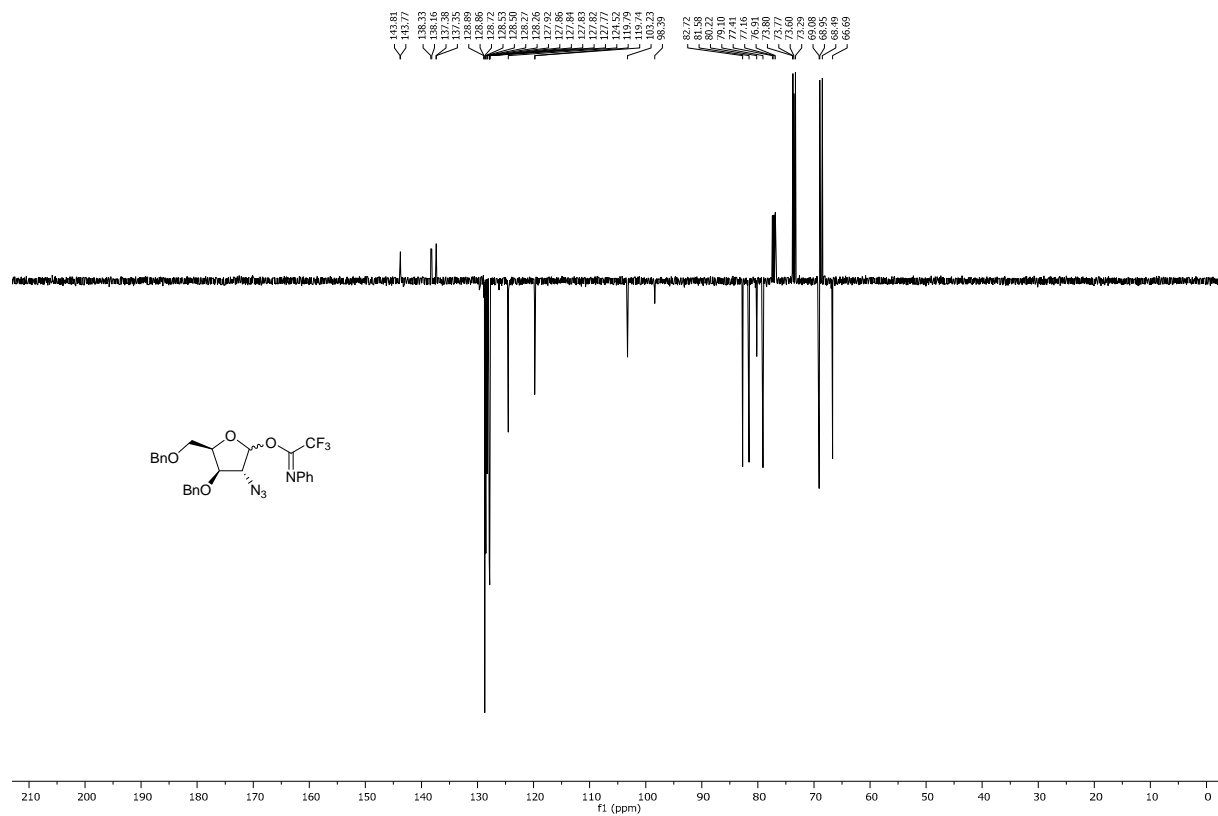

$^1\text{H}$ - $^1\text{H}$  COSY of compound **8**

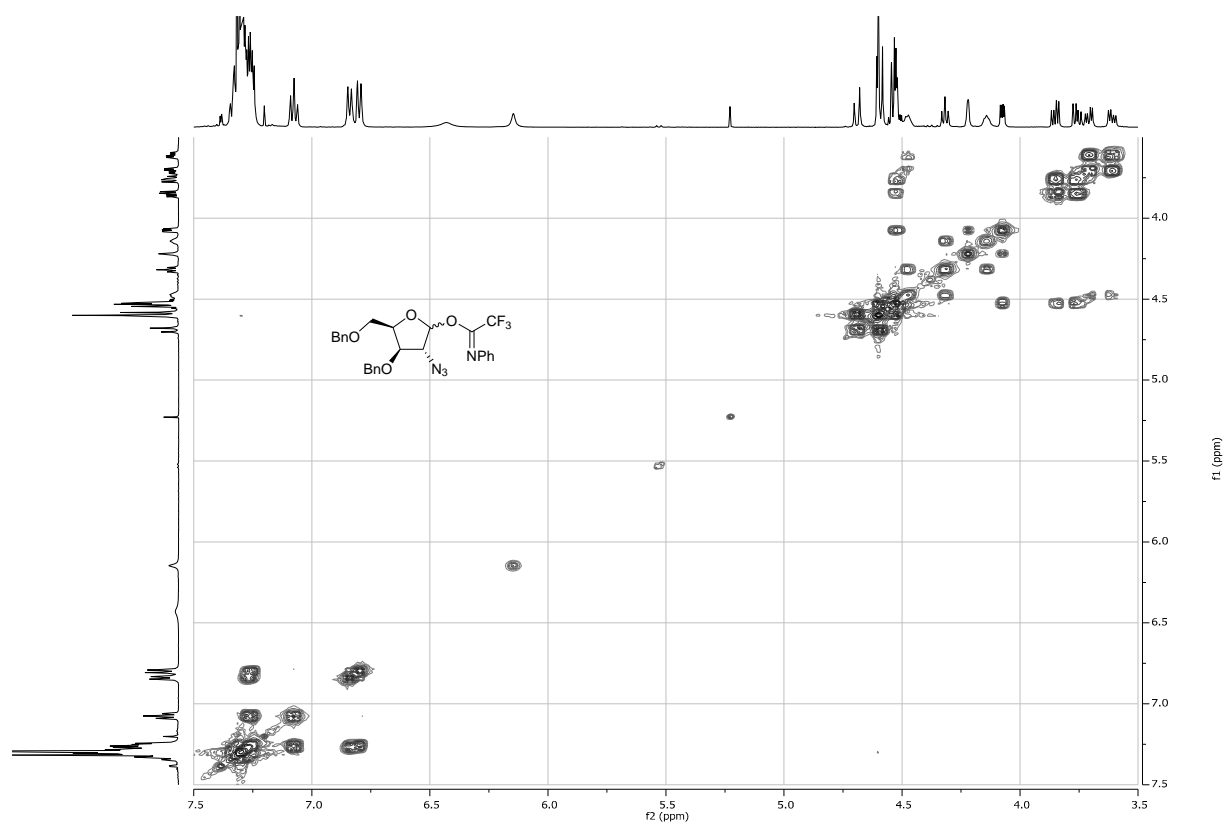

$^1\text{H}$ - $^{13}\text{C}$  HSQC of compound **8**

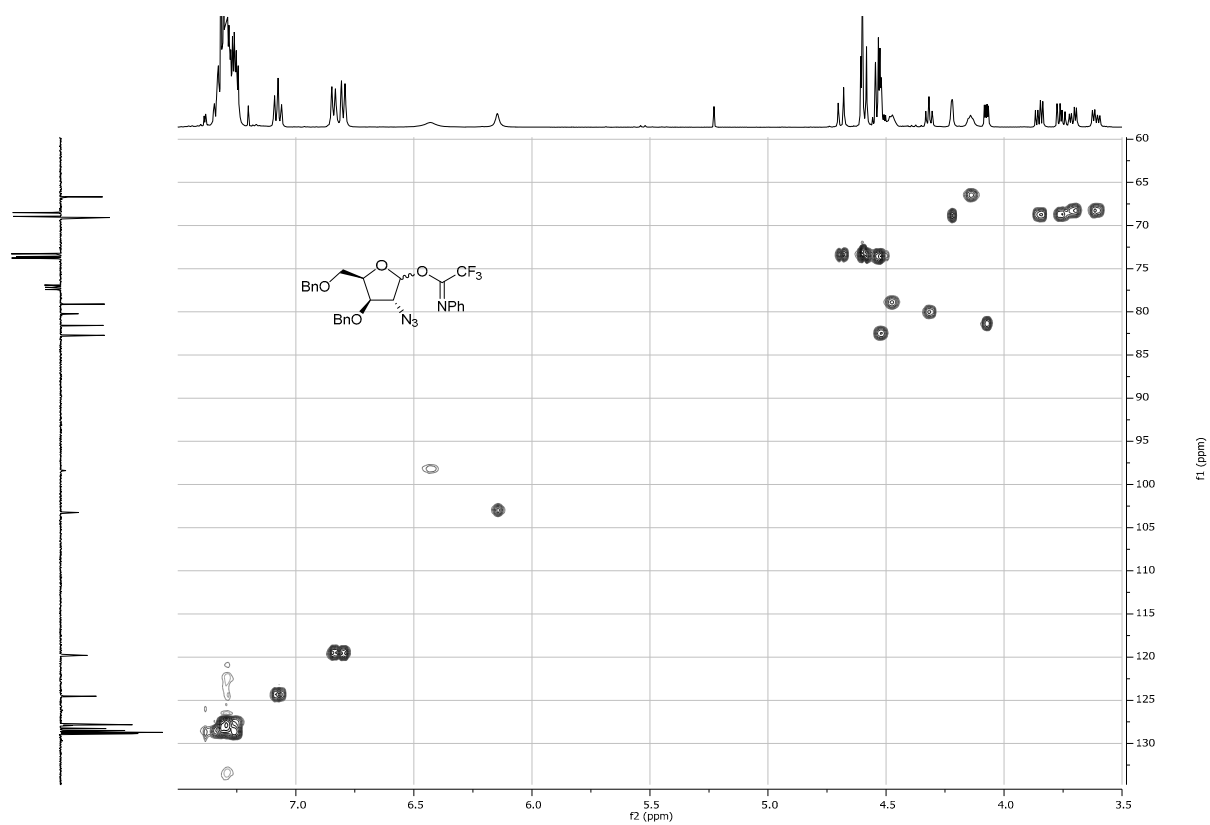

3,5-di-*O*-benzyl-2-deoxy-2-fluoro-1-*O*-(*N*-[phenyl]trifluoroacetimidoyl)- $\beta$ -D-ribofuranoside (**9 $\beta$** ). [T = 323 K]

$^1\text{H}$  NMR, 400 MHz,  $\text{CDCl}_3$  of compound **9 $\beta$**

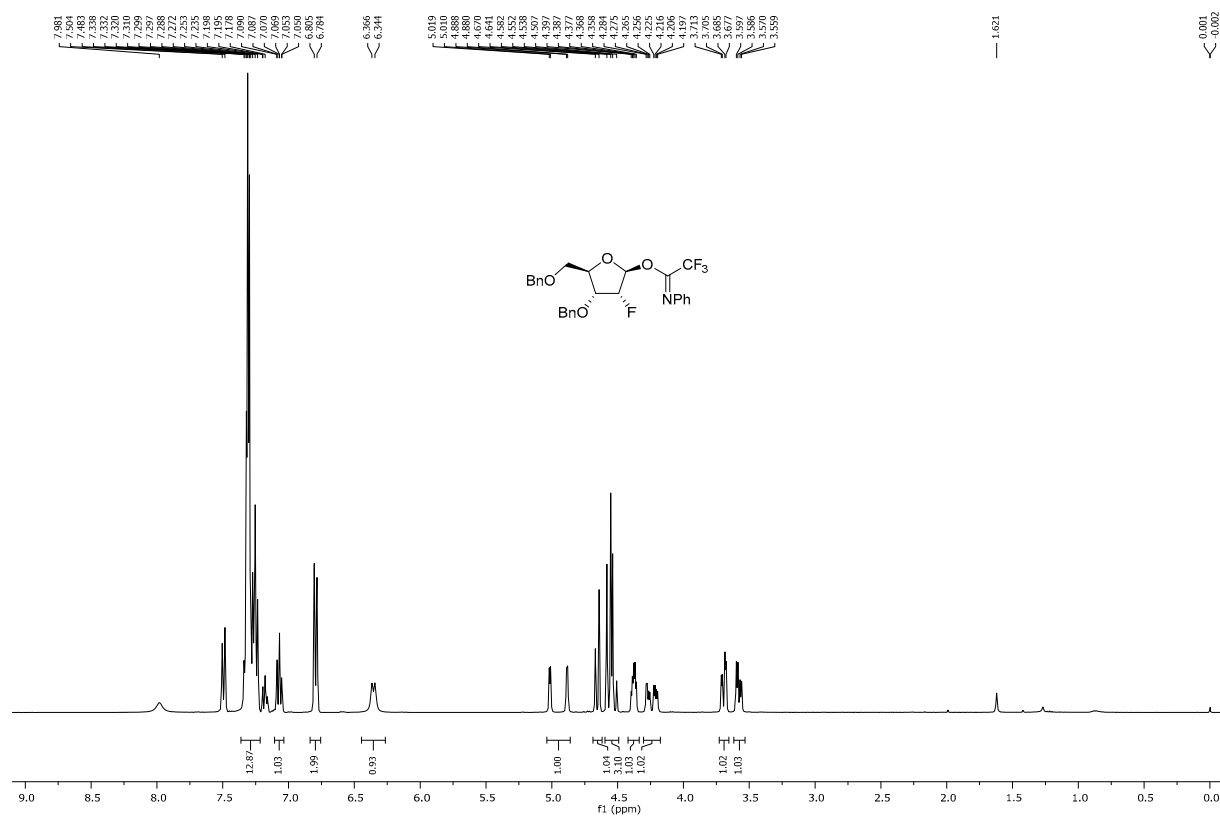

$^{19}\text{F}$ -decoupled  $^1\text{H}$  NMR, (-200 ppm), T = 298 K

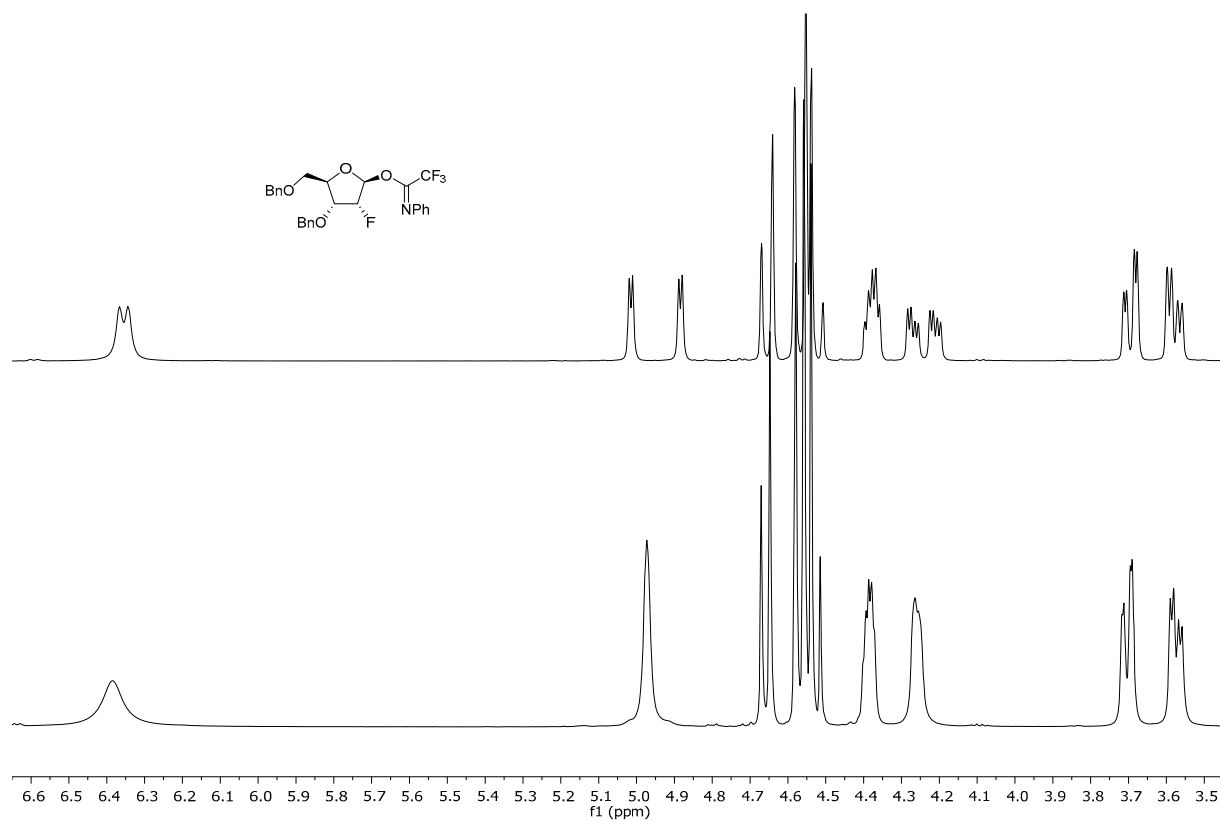

$^{13}\text{C}$ -APT NMR, 101 MHz,  $\text{CDCl}_3$  of compound **9 $\beta$**

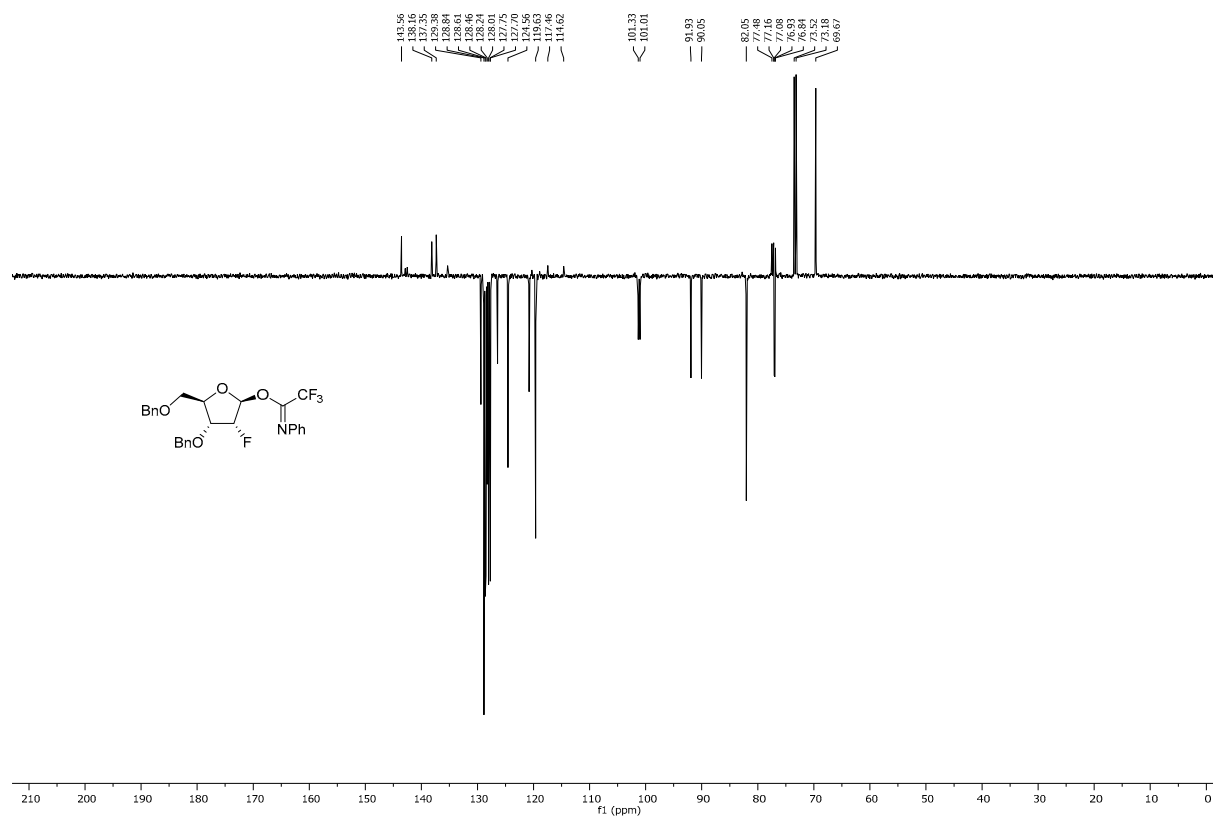

$^{19}\text{F}$  NMR, 471 MHz,  $\text{CDCl}_3$  of compound **9 $\beta$**

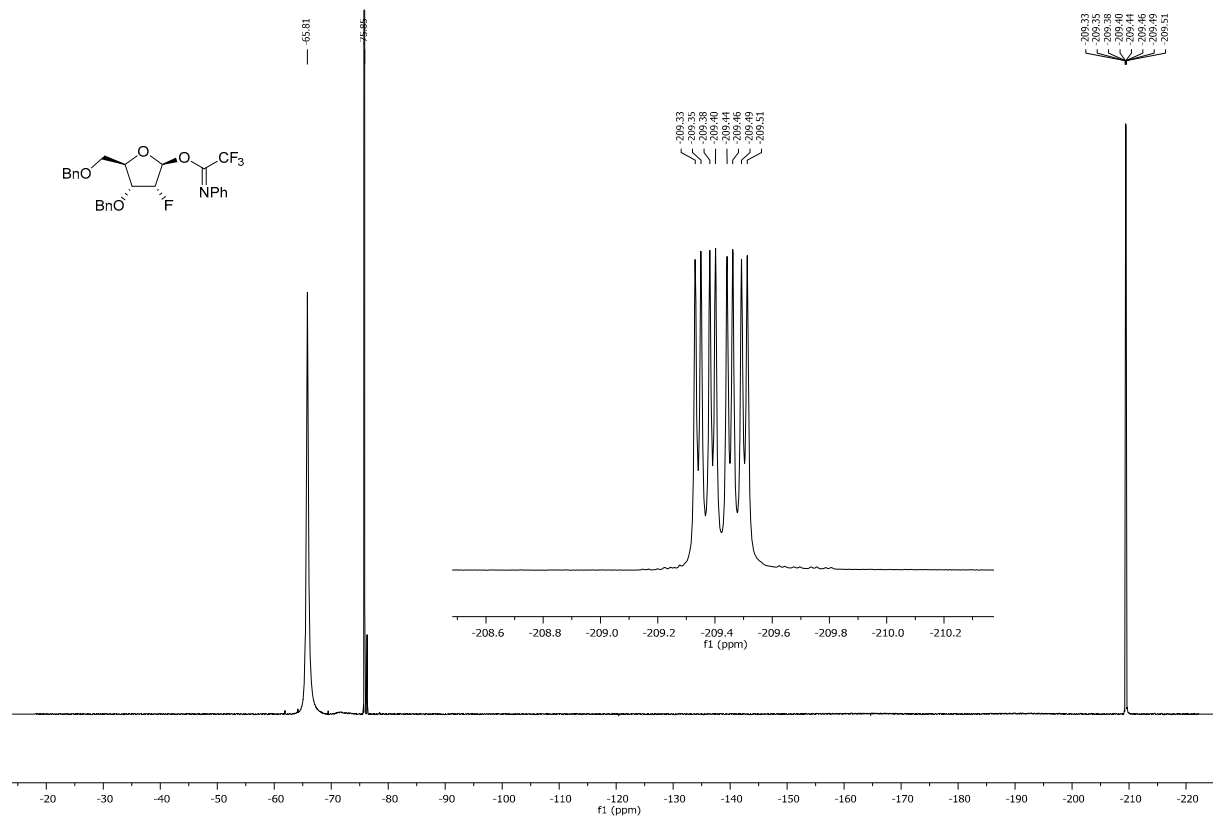

$^1\text{H}$ - $^1\text{H}$  COSY of compound **9 $\beta$**

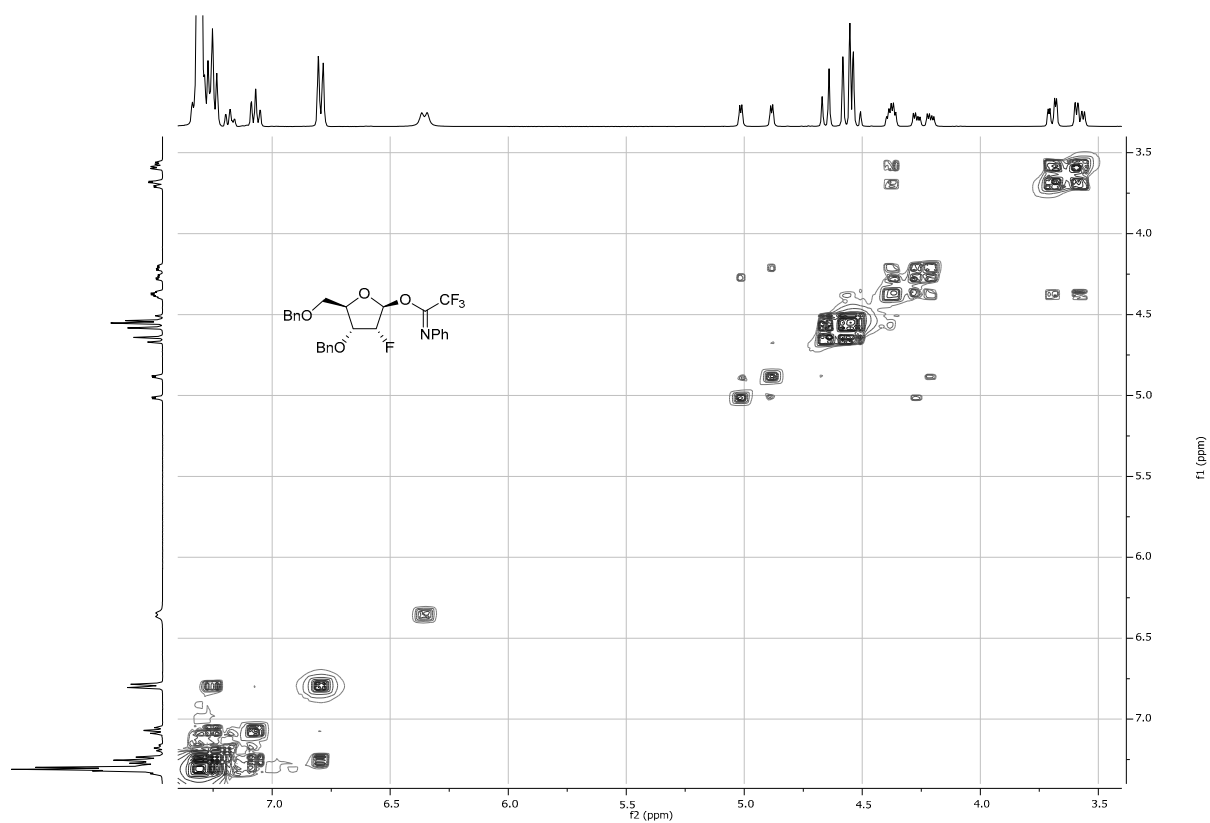

$^1\text{H}$ - $^{13}\text{C}$  HSQC of compound **9 $\beta$**

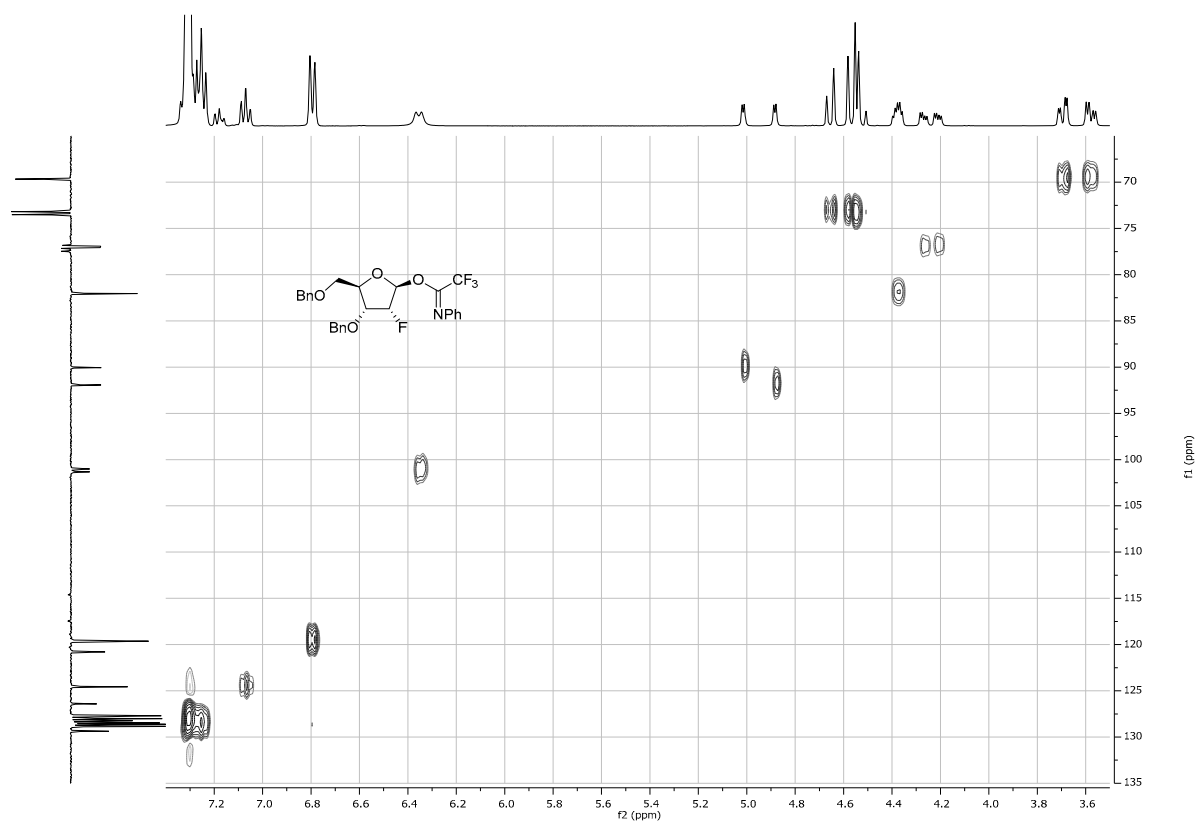

3,5-di-O-benzyl-2-deoxy-2-fluoro-1-O-(*N*-[phenyl]trifluoroacetimidoyl)- $\alpha$ -D-arabinofuranoside (**10 $\alpha$** ) [*T* = 323 K]

$^1\text{H}$  NMR, 500 MHz,  $\text{CDCl}_3$  of compound **10 $\alpha$**

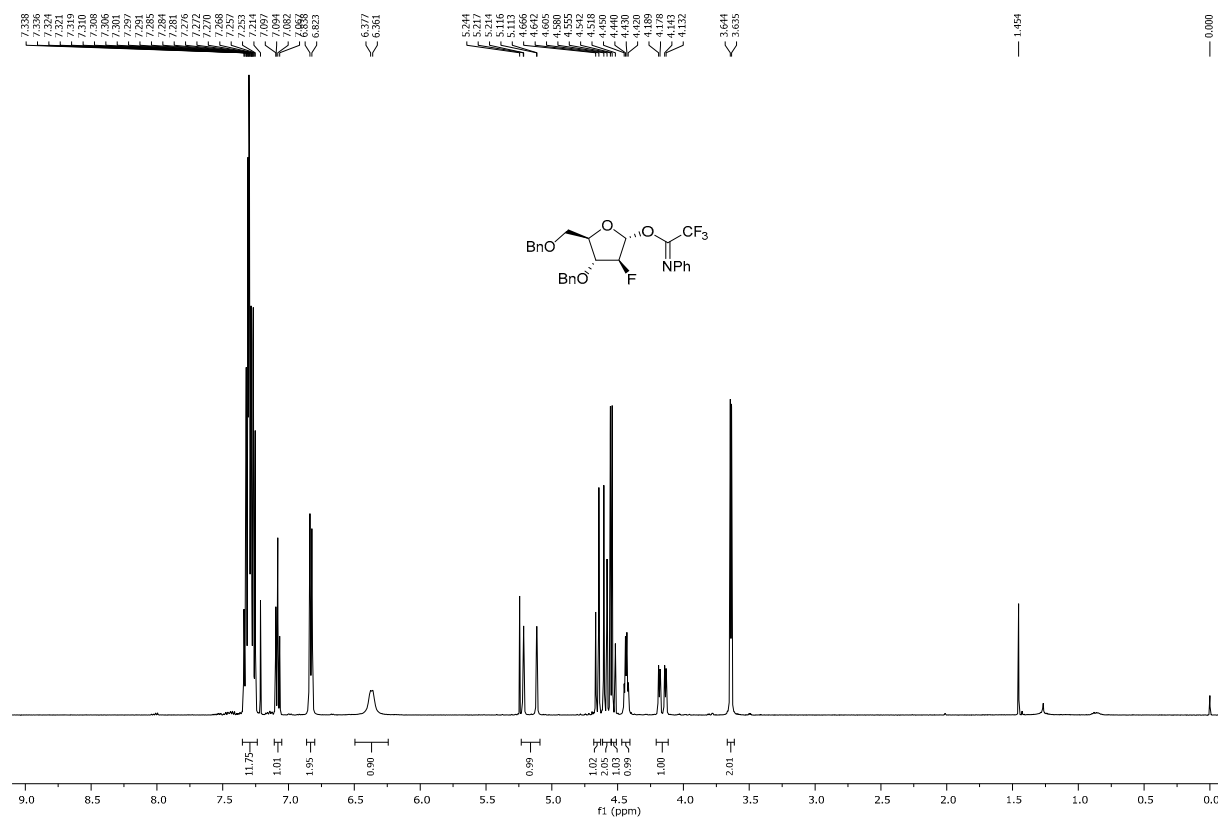

$^{19}\text{F}$ -decoupled  $^1\text{H}$  NMR, (-188 ppm)

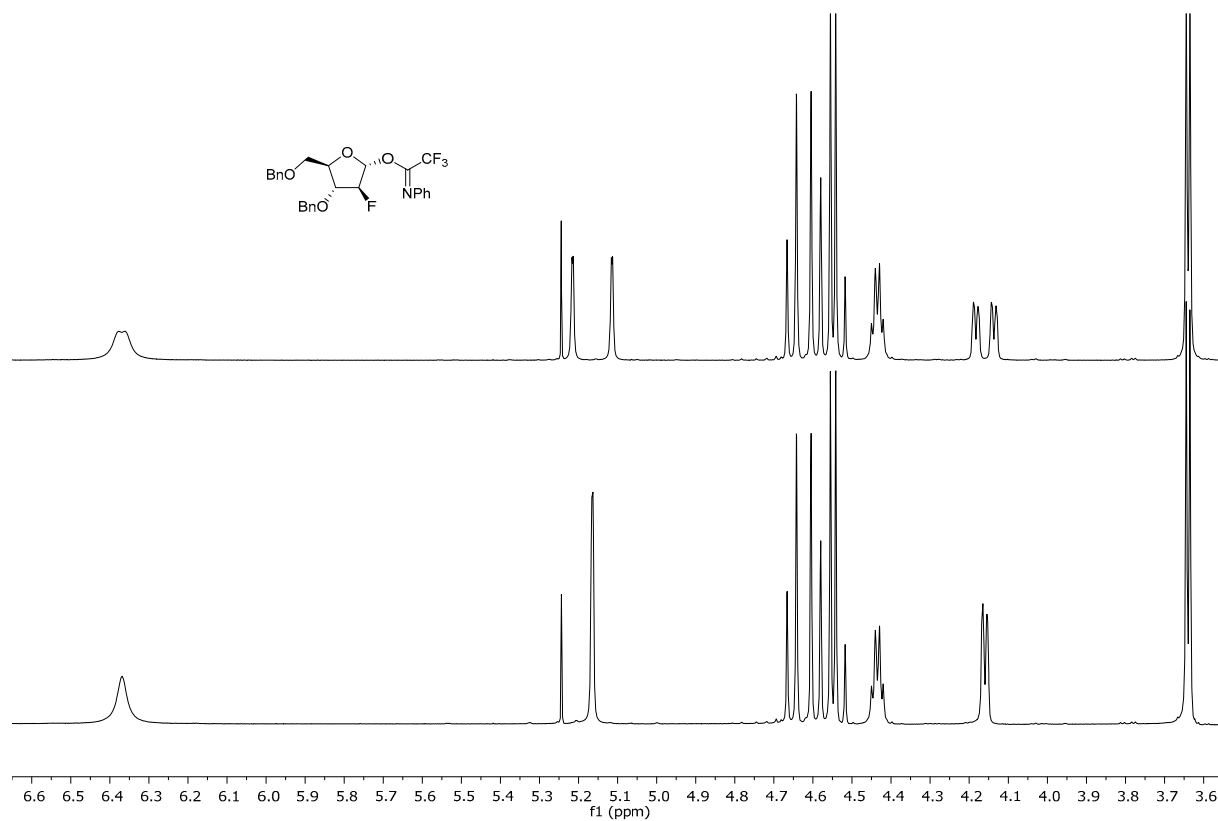



$^{13}\text{C}$ -APT NMR, 126 MHz,  $\text{CDCl}_3$  of compound **10 $\alpha$**

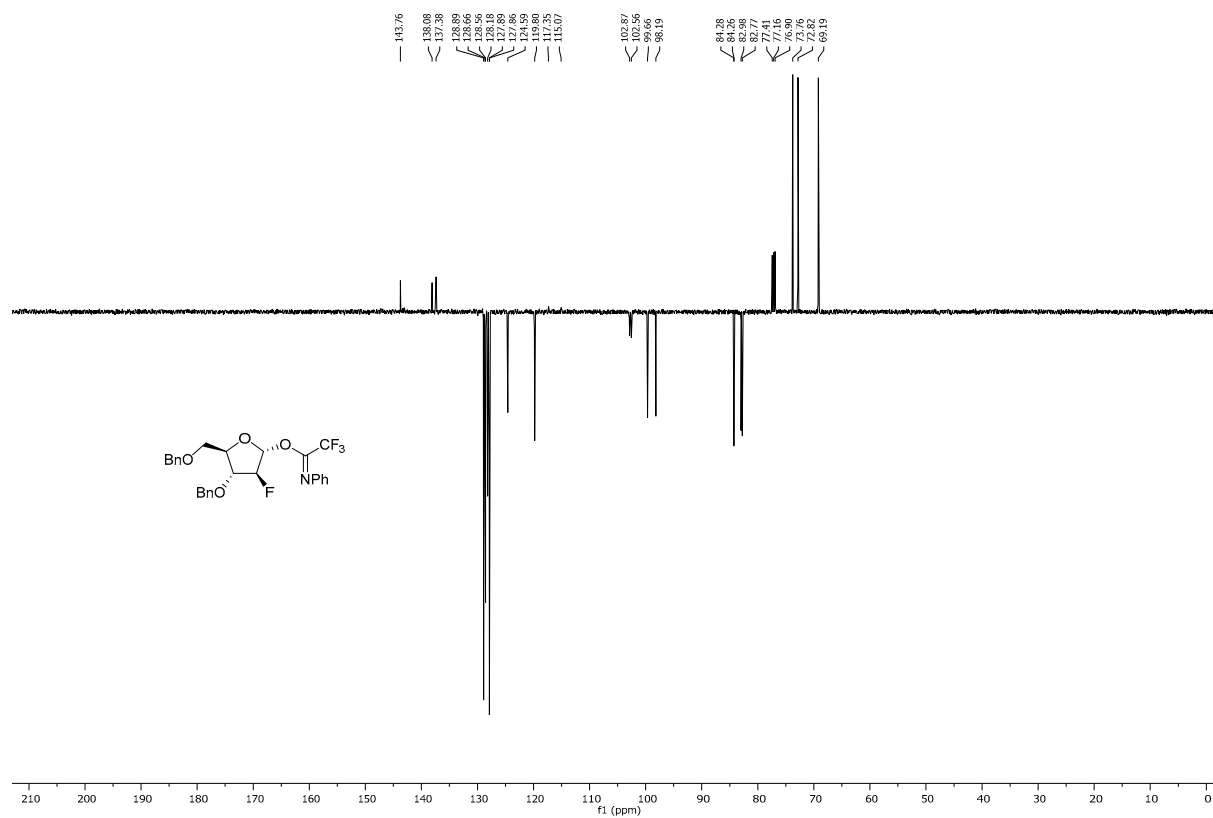

$^{19}\text{F}$  NMR, 471 MHz,  $\text{CDCl}_3$  of compound **10 $\alpha$**

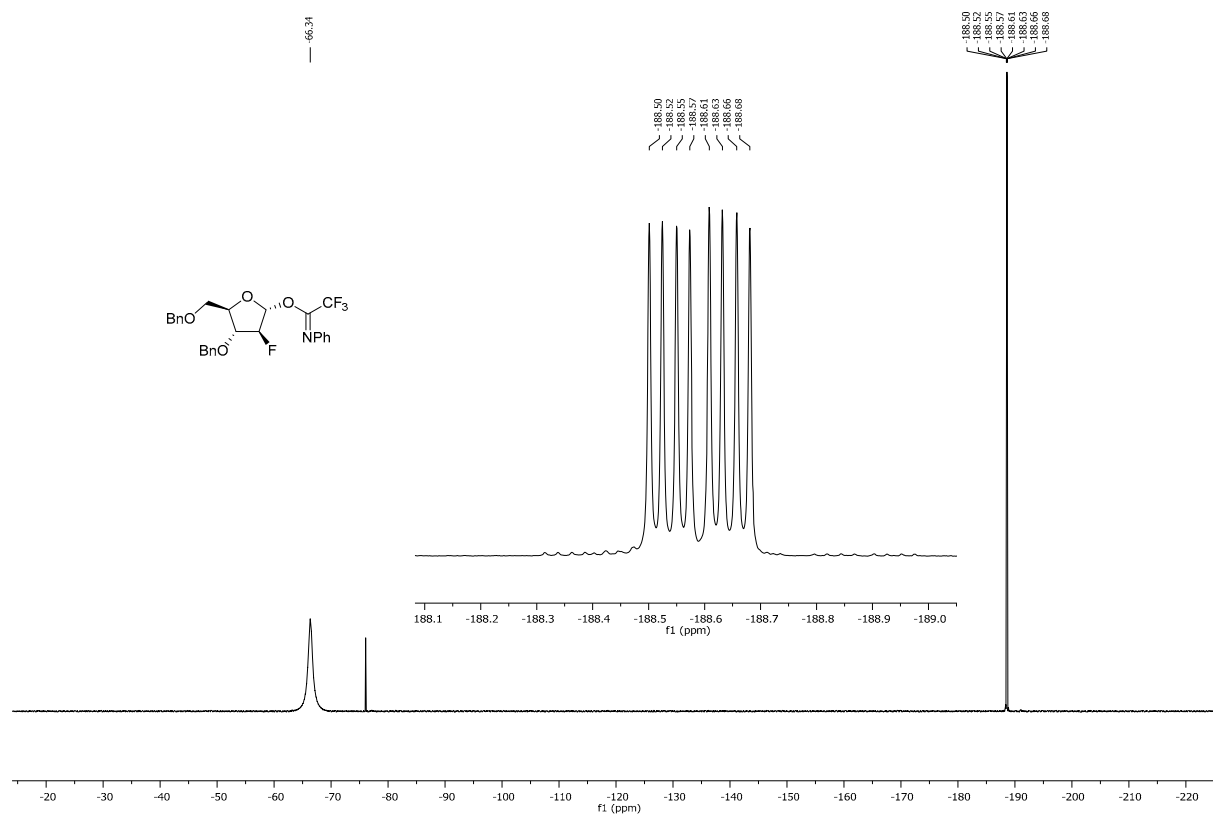

$^1\text{H}$ - $^1\text{H}$  COSY of compound **10 $\alpha$**

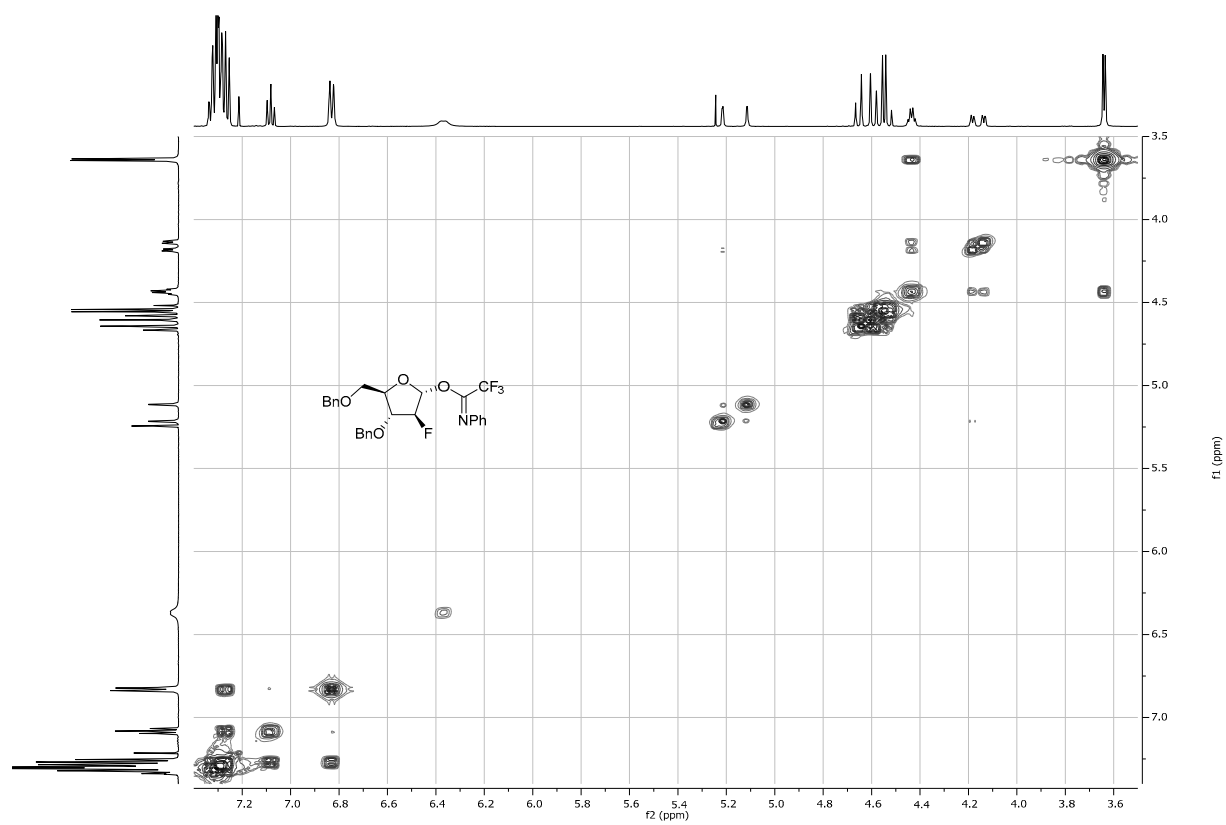

$^1\text{H}$ - $^{13}\text{C}$  HSQC of compound **10 $\alpha$**

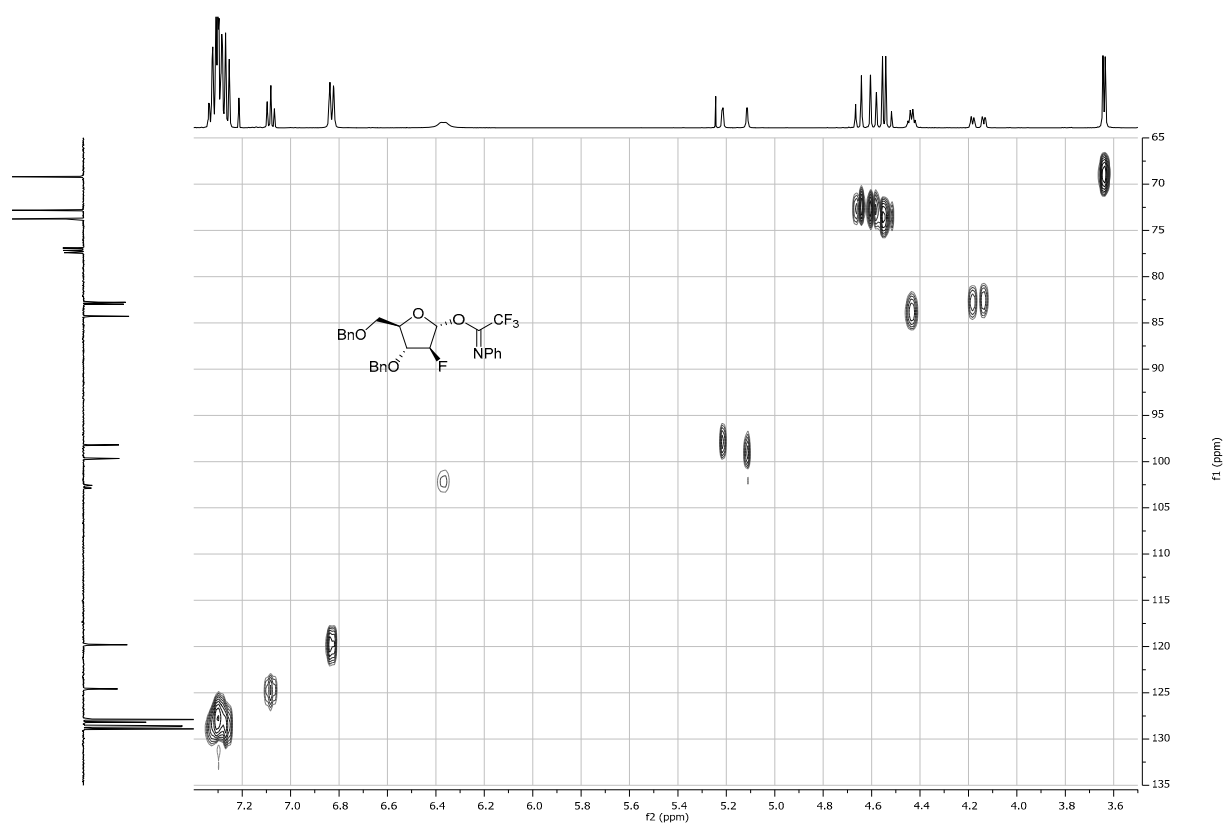

3,5-di-O-benzyl-2-deoxy-2-fluoro-1-O-(*N*-[phenyl]trifluoroacetimidoyl)- $\beta$ -D-arabinofuranoside (**10 $\beta$** ) [*T* = 323 K]

$^1\text{H}$  NMR, 500 MHz,  $\text{CDCl}_3$  of compound **10 $\beta$**

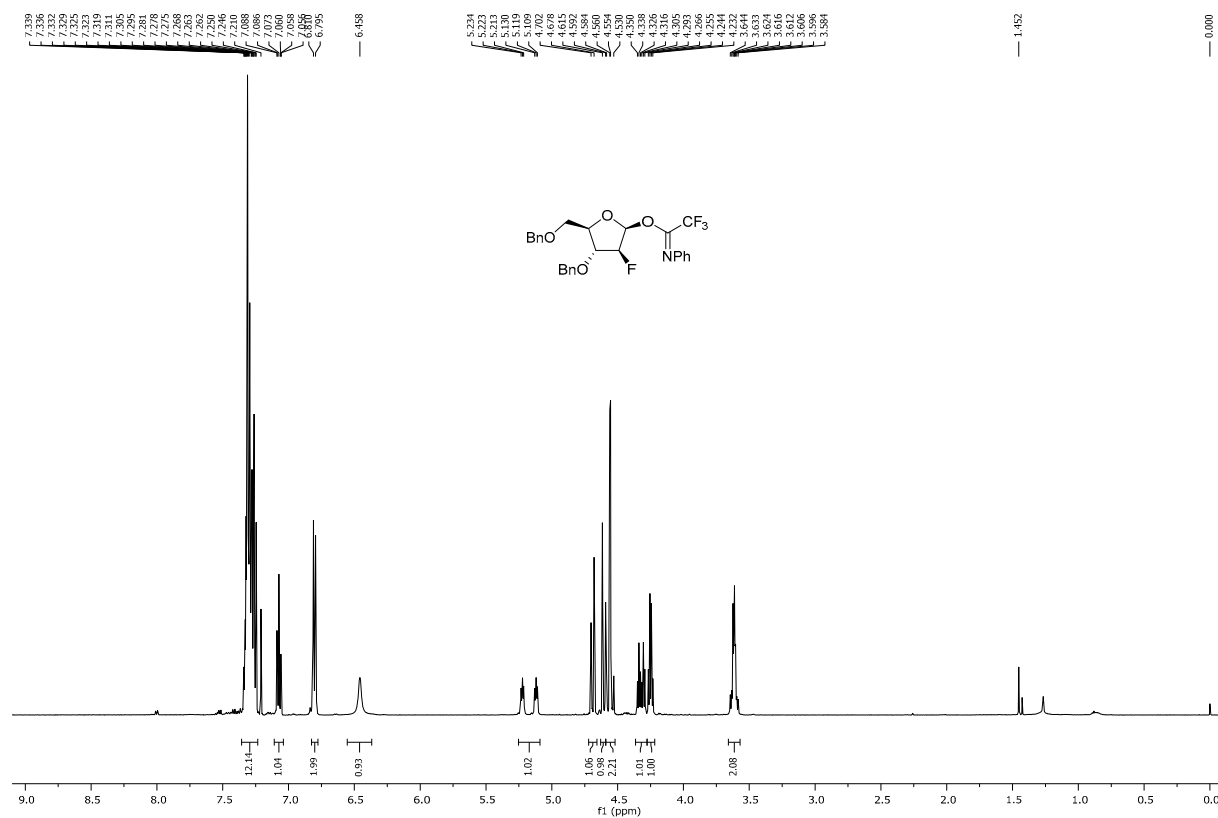

$^{19}\text{F}$ -decoupled  $^1\text{H}$  NMR, (-200 ppm)

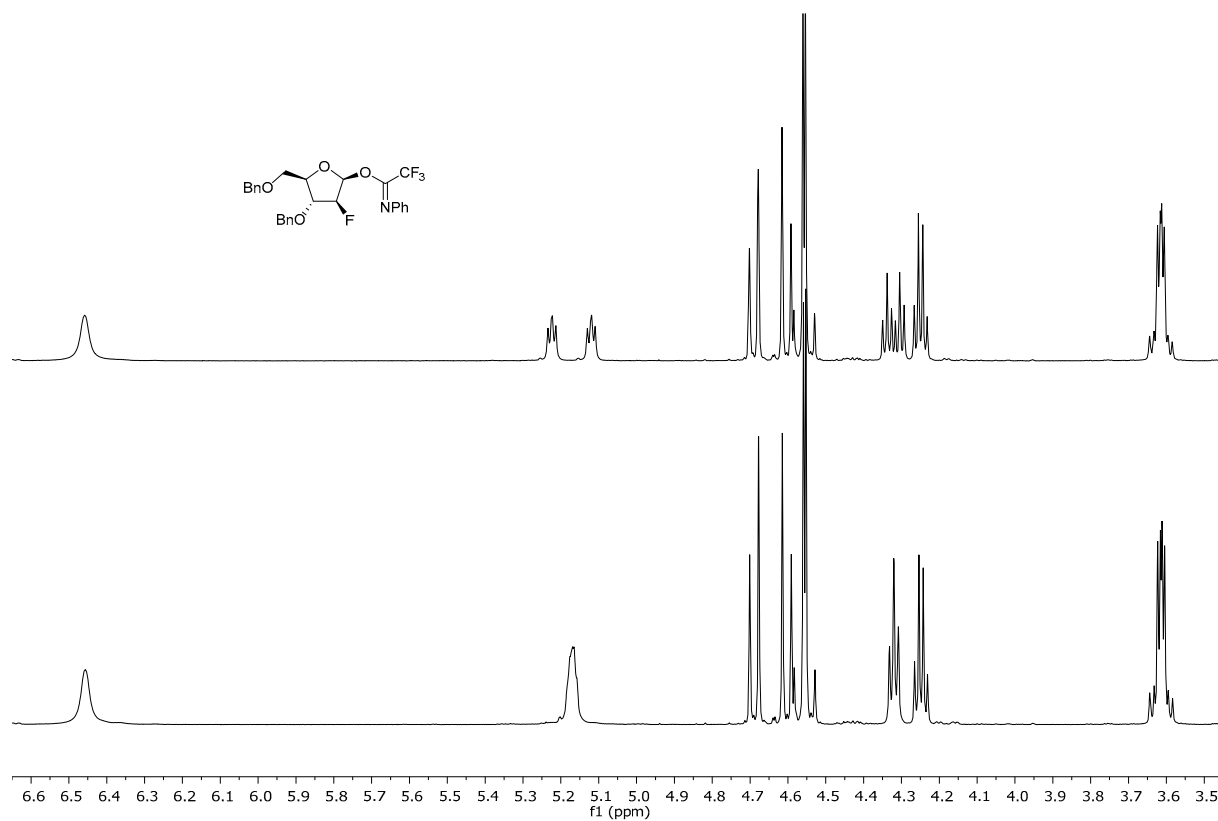

<sup>13</sup>C-APT NMR, 126 MHz, CDCl<sub>3</sub> of compound **10β**

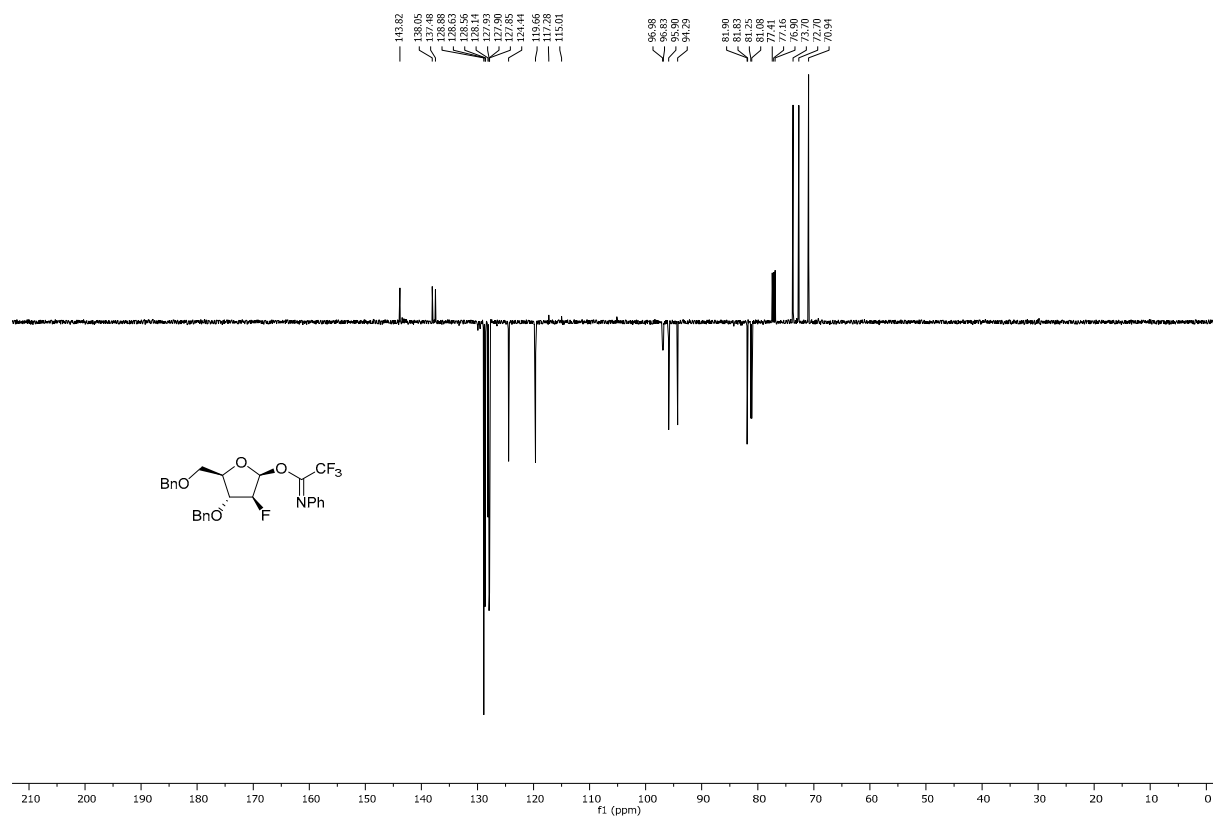

<sup>19</sup>F NMR, 471 MHz, CDCl<sub>3</sub> of compound **10β**

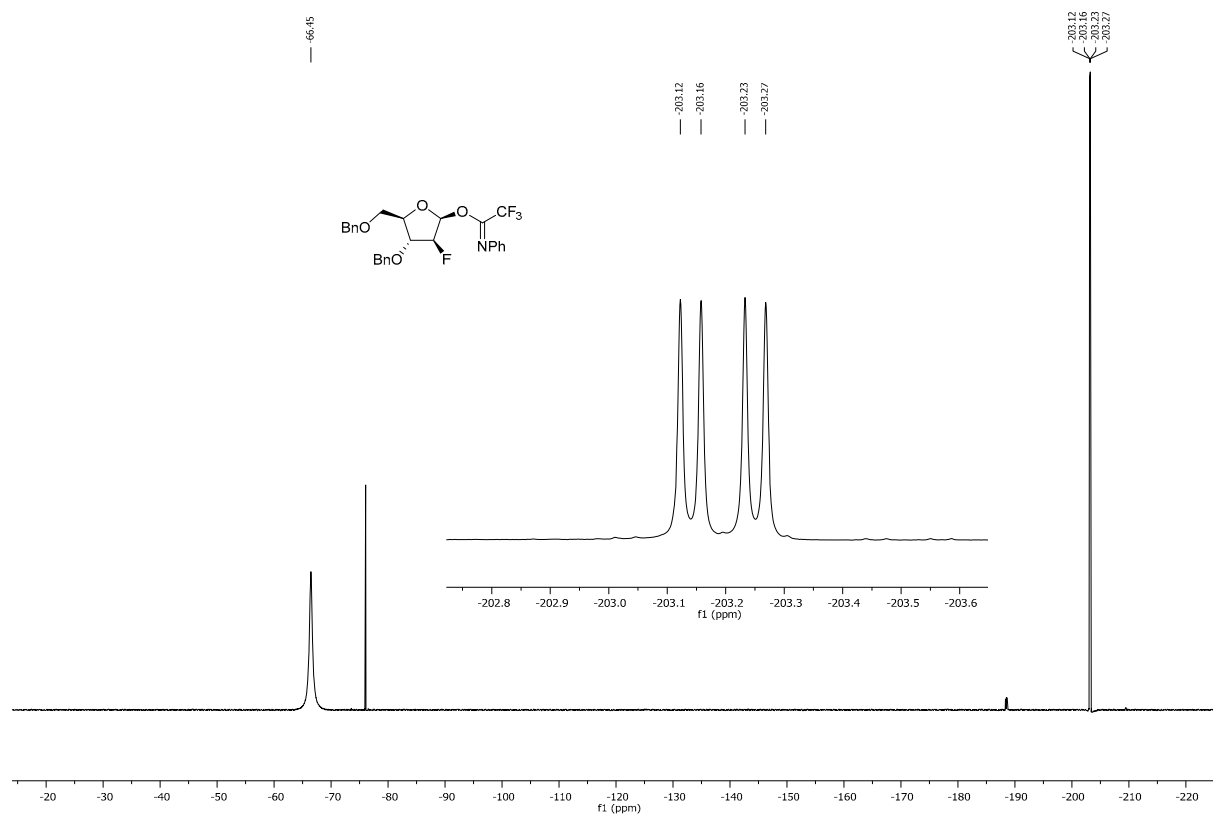

<sup>1</sup>H-<sup>1</sup>H COSY of compound **10β**

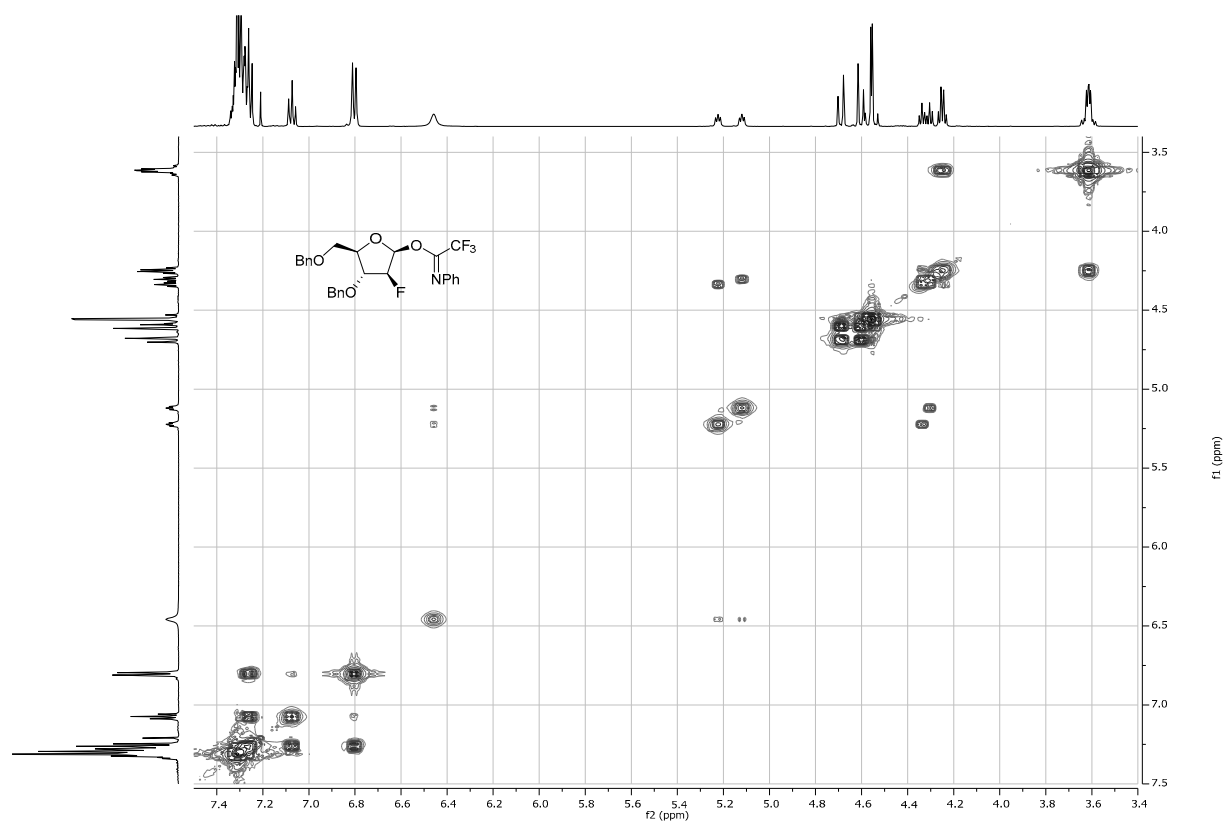

<sup>1</sup>H-<sup>13</sup>C HSQC of compound **10β**

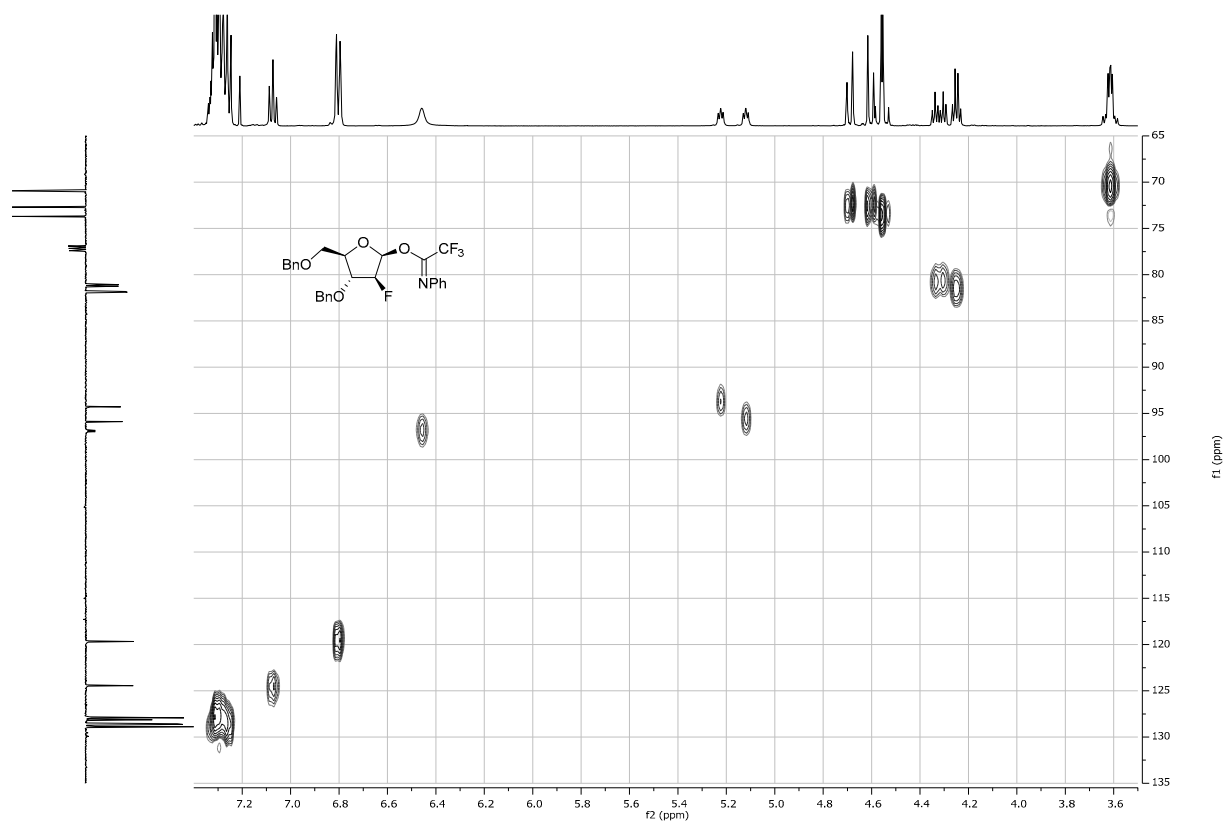

3,5-di-O-benzyl-2-deoxy-2-fluoro-1-O-(*N*-[phenyl]trifluoroacetimidoyl)- $\alpha$ -D-lyxofuranoside (**11 $\alpha$** ) [*T* = 323 K]

$^1\text{H}$  NMR, 500 MHz,  $\text{CDCl}_3$  of compound **11 $\alpha$**

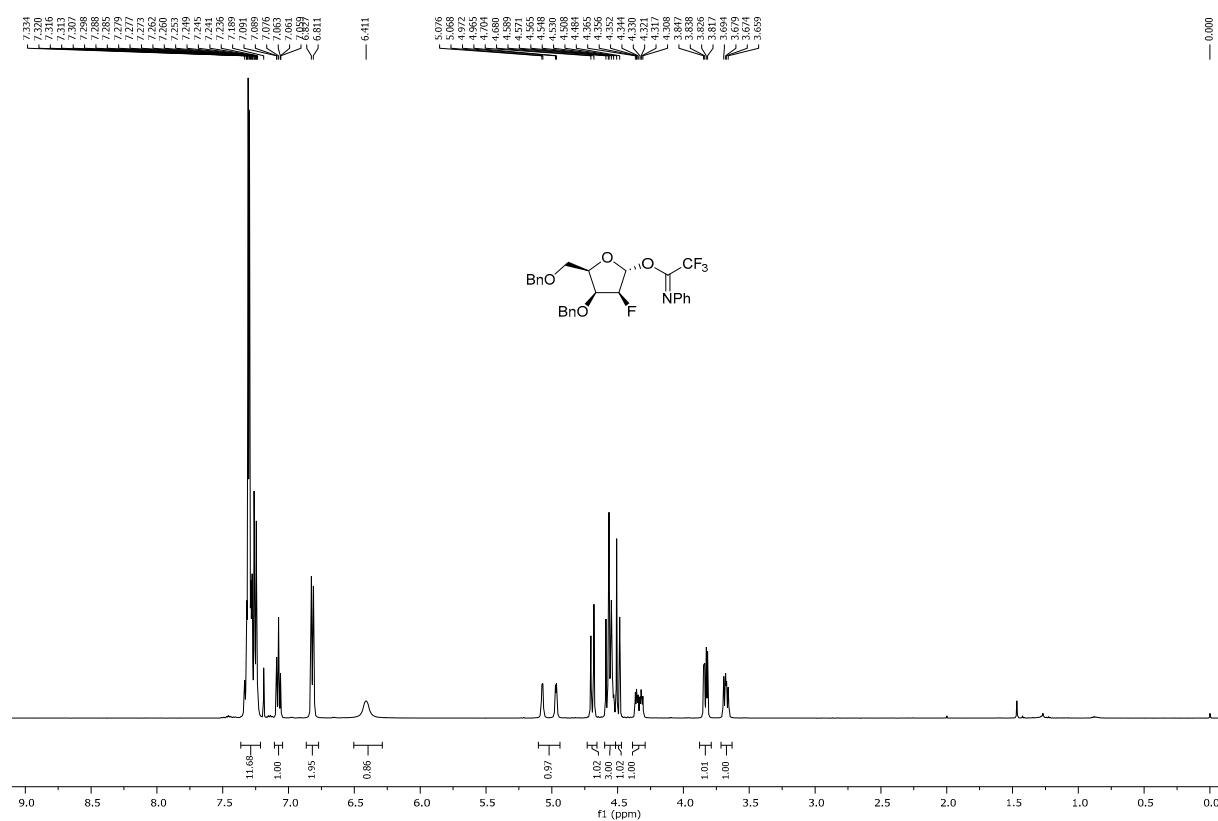

$^{19}\text{F}$ -decoupled  $^1\text{H}$  NMR, (-207 ppm)

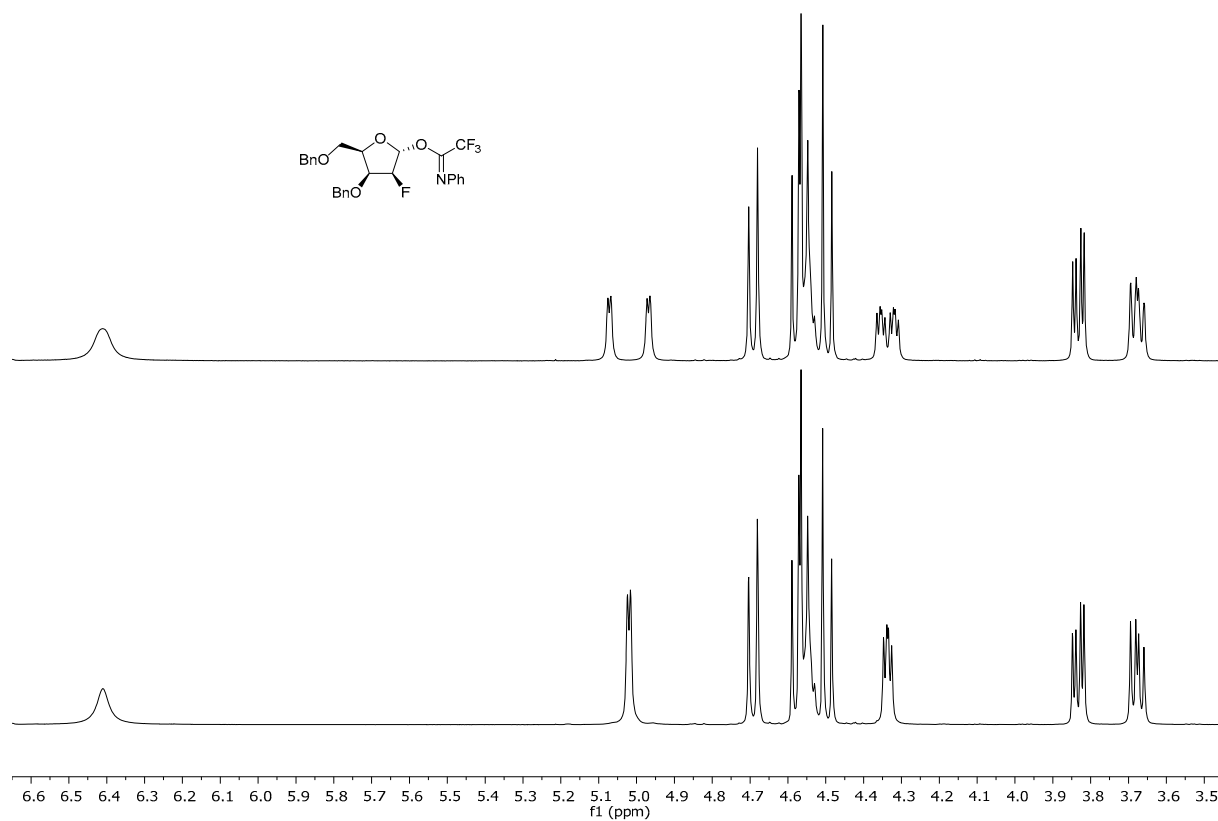

$^{13}\text{C}$ -APT NMR, 126 MHz,  $\text{CDCl}_3$  of compound **11 $\alpha$**

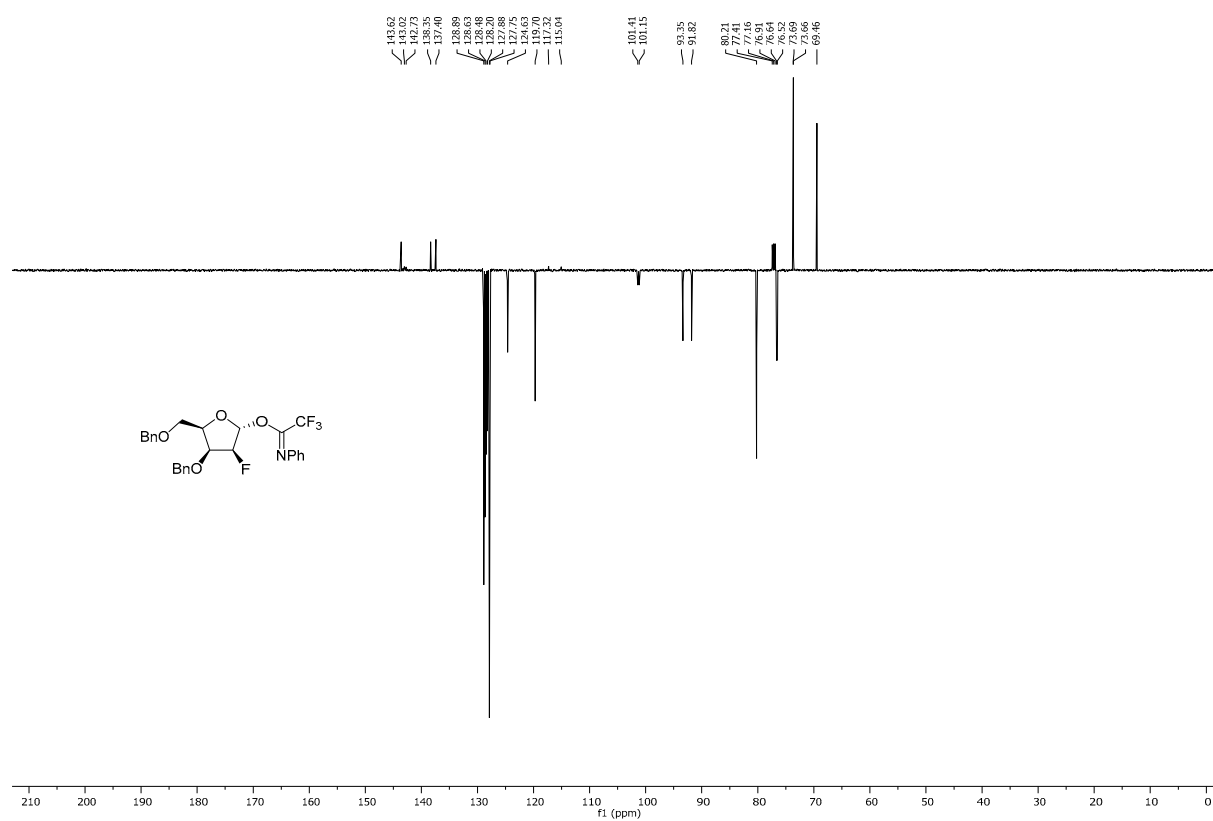

$^{19}\text{F}$  NMR, 471 MHz,  $\text{CDCl}_3$  of compound **11 $\alpha$**

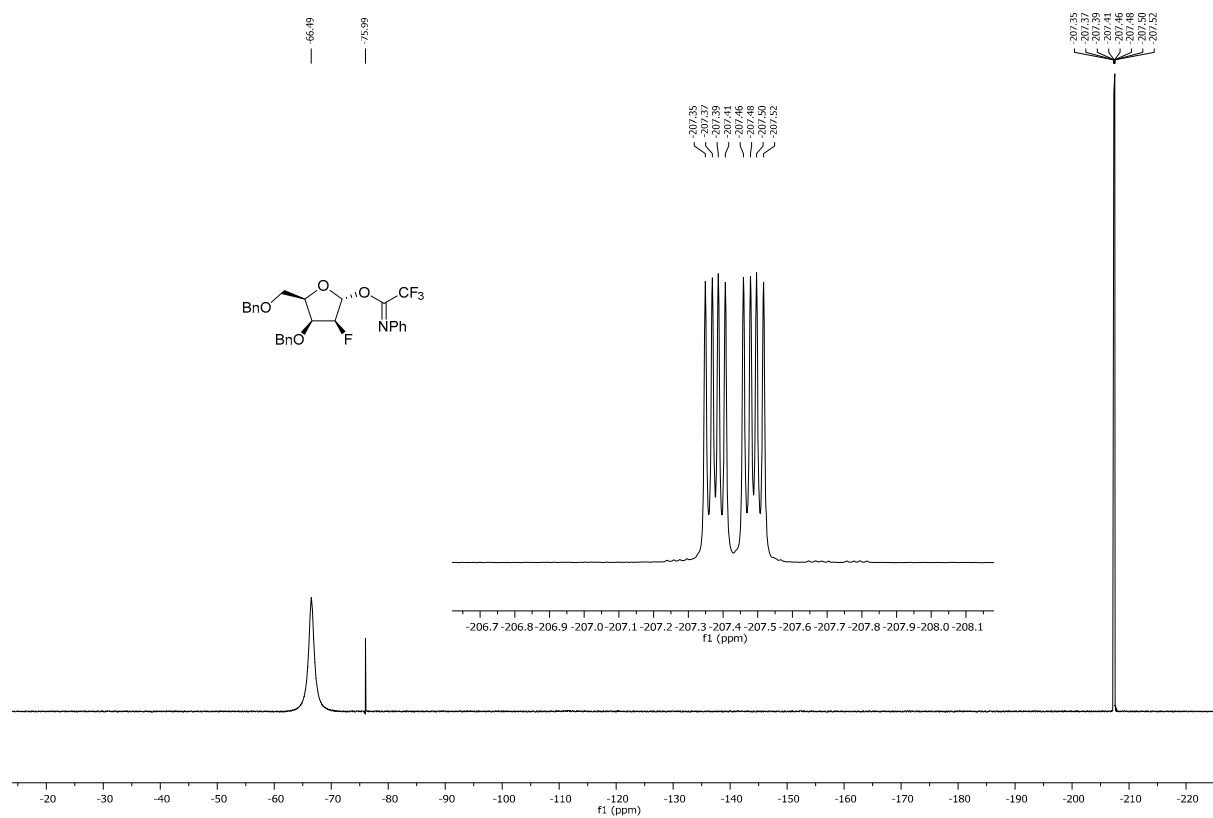

$^1\text{H}$ - $^1\text{H}$  COSY of compound **11 $\alpha$**

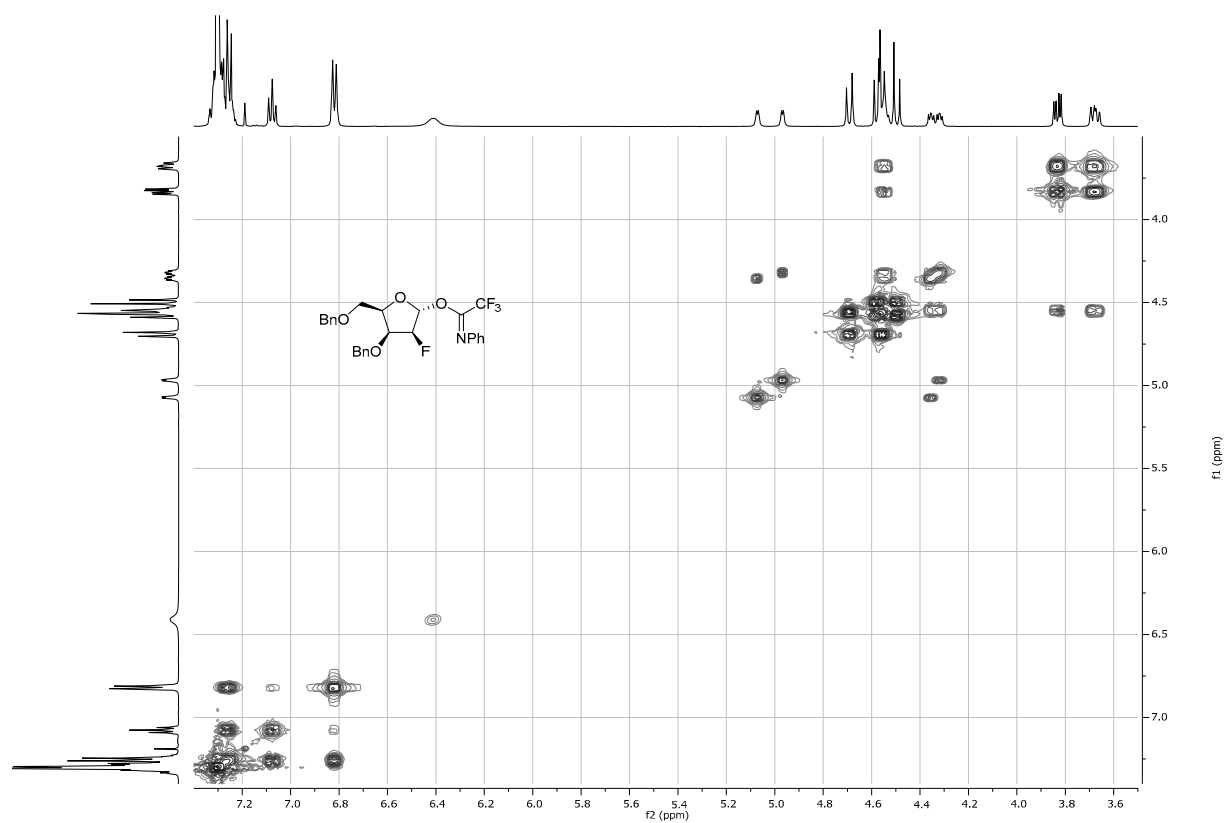

$^1\text{H}$ - $^{13}\text{C}$  HSQC of compound **11 $\alpha$**

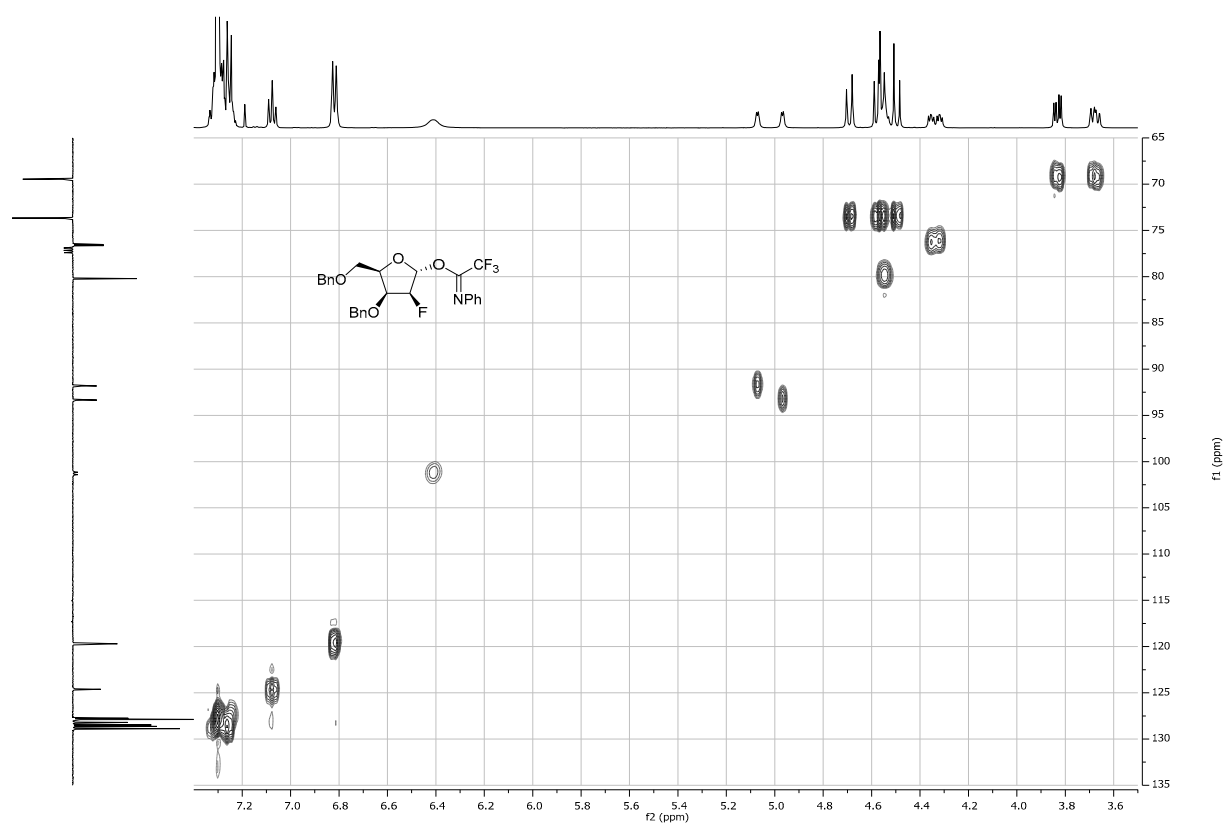



3,5-di-*O*-benzyl-2-deoxy-2-fluoro-1-*O*-(*N*-[phenyl]trifluoroacetimidoyl)- $\alpha/\beta$ -D-xylofuranoside (**12**) [*T* = 323 K]

$^1\text{H}$  NMR, 500 MHz,  $\text{CDCl}_3$  of compound **12**

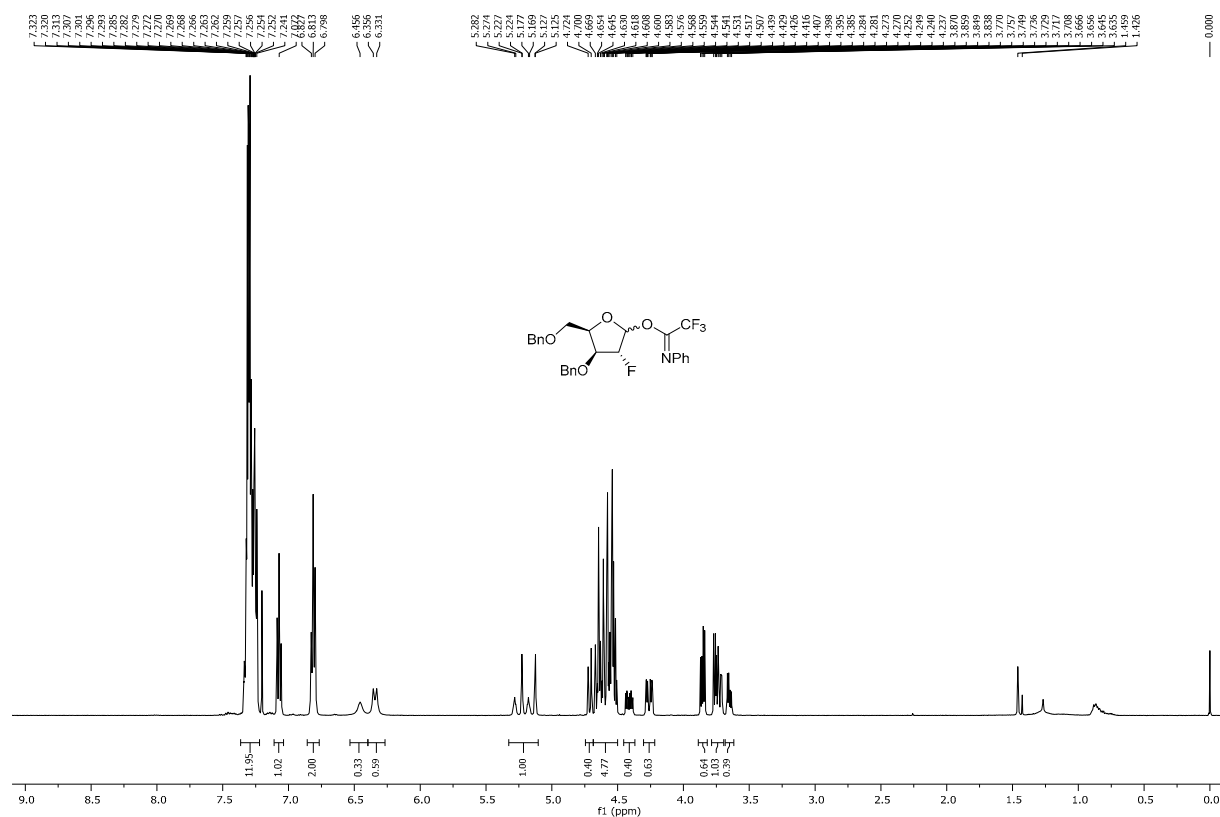

$^{19}\text{F}$ -decoupled  $^1\text{H}$  NMR, (-200 ppm)

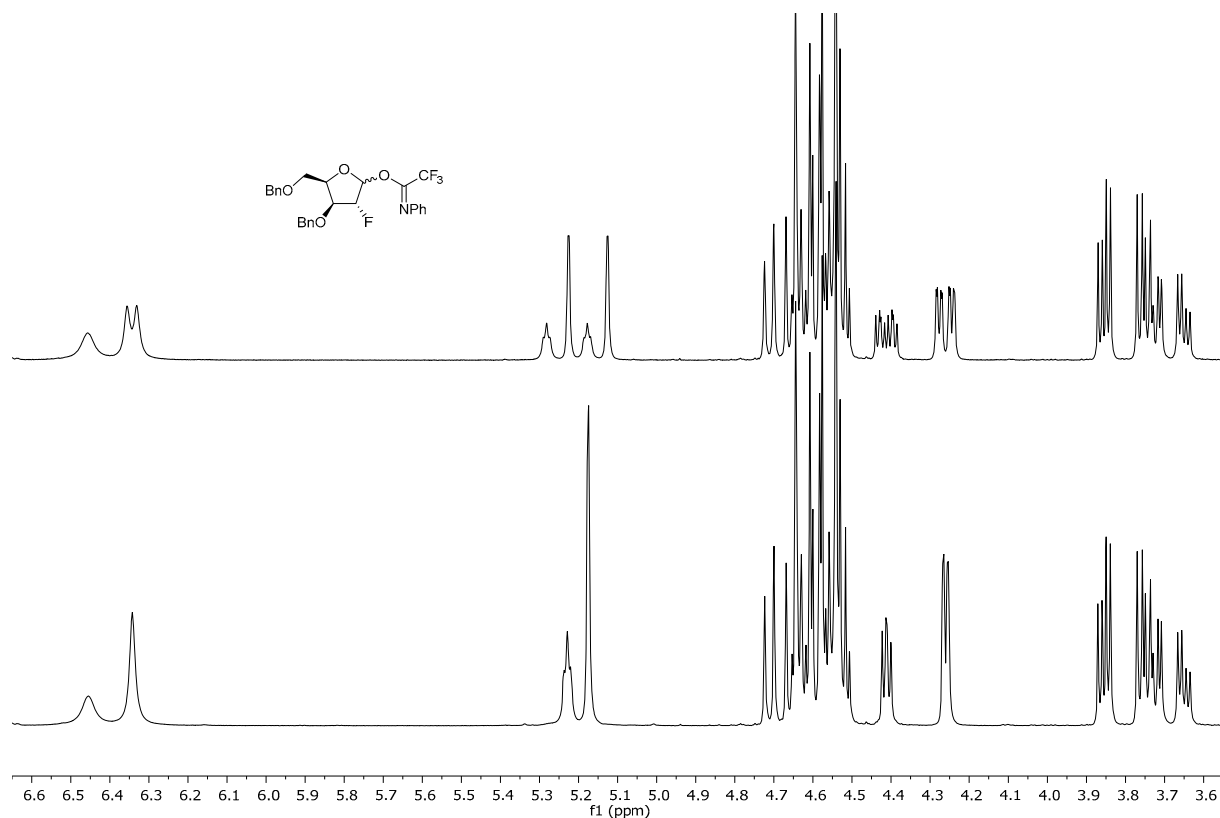

$^{13}\text{C}$ -APT NMR, 126 MHz,  $\text{CDCl}_3$  of compound **12**

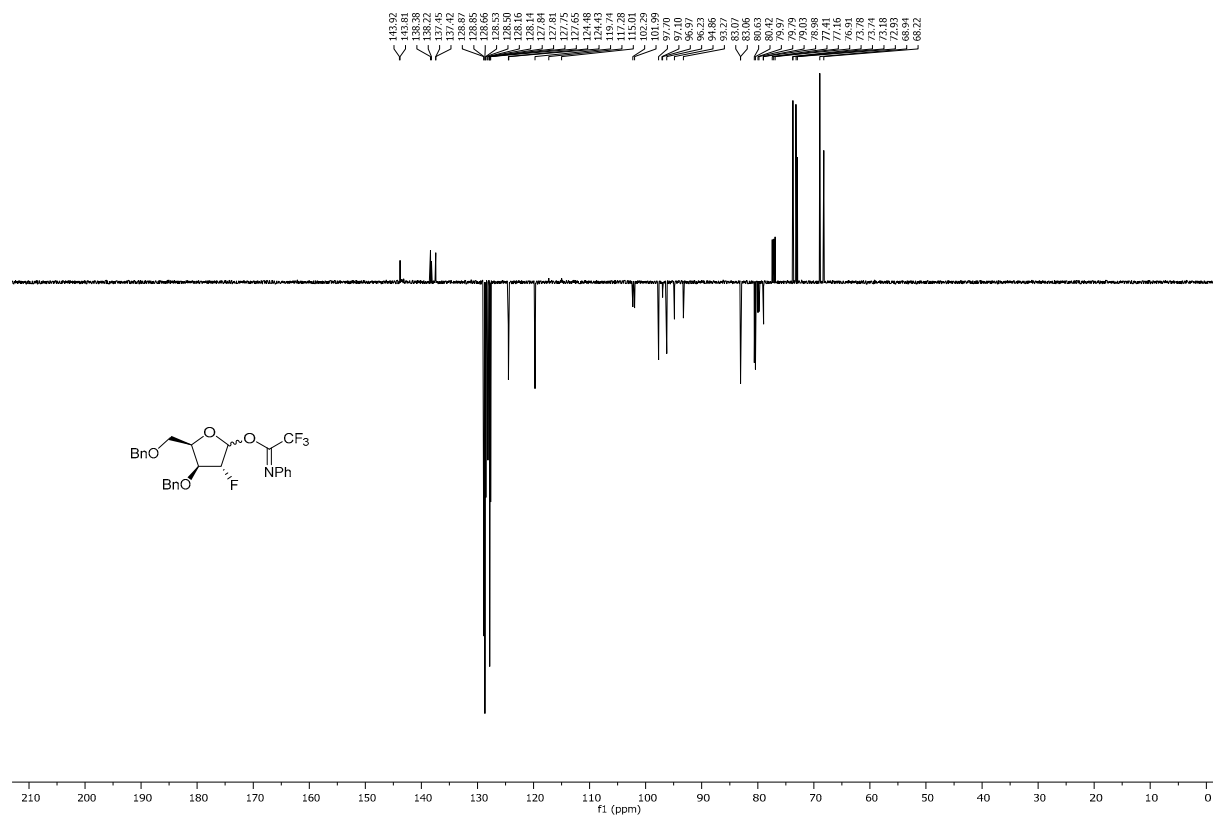

$^{19}\text{F}$  NMR, 471 MHz,  $\text{CDCl}_3$  of compound **12**

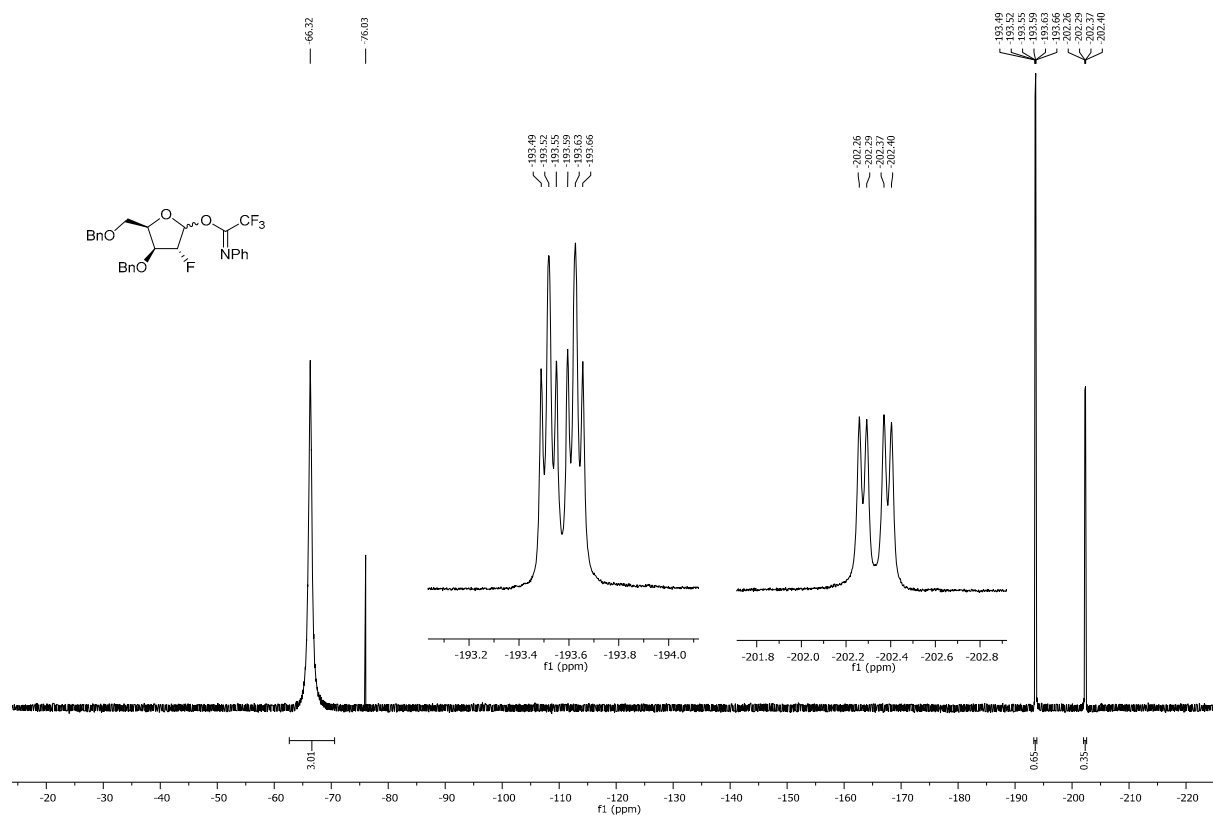

$^1\text{H}$ - $^1\text{H}$  COSY of compound **12**

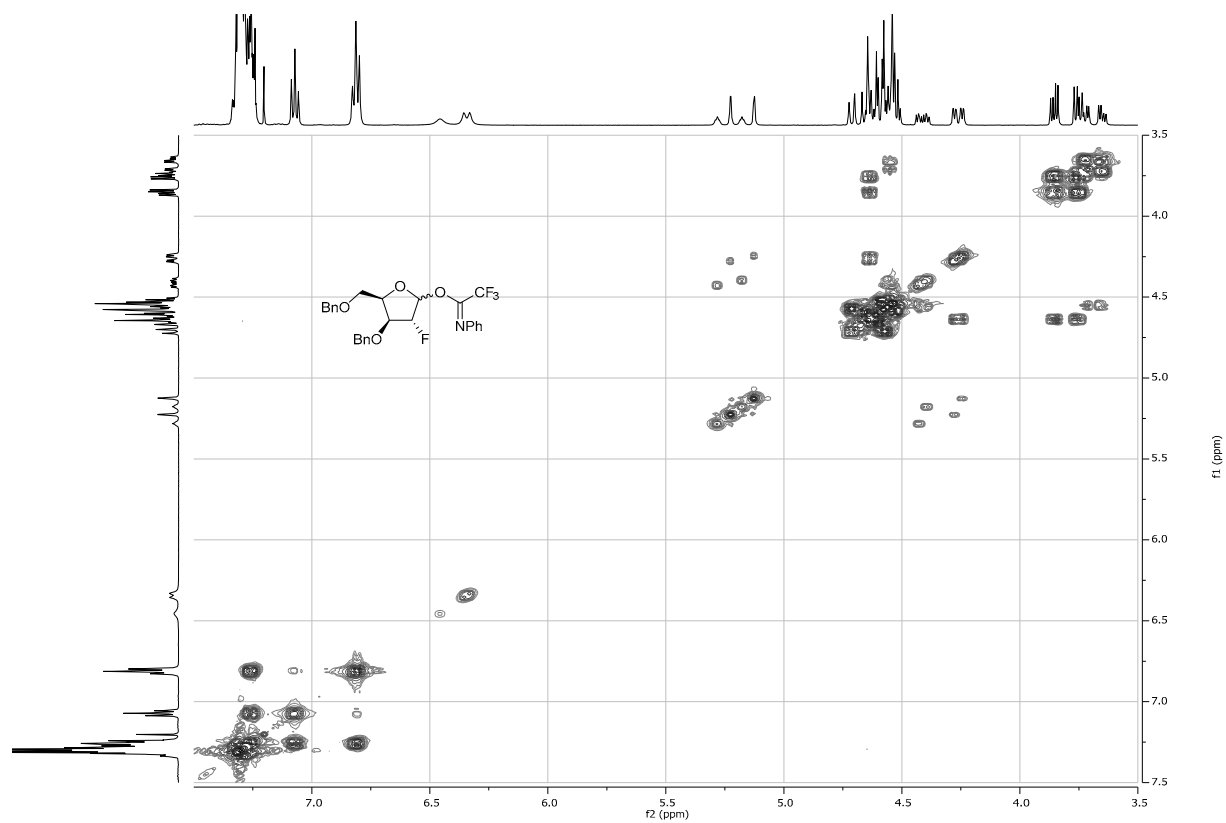

$^1\text{H}$ - $^{13}\text{C}$  HSQC of compound **12**

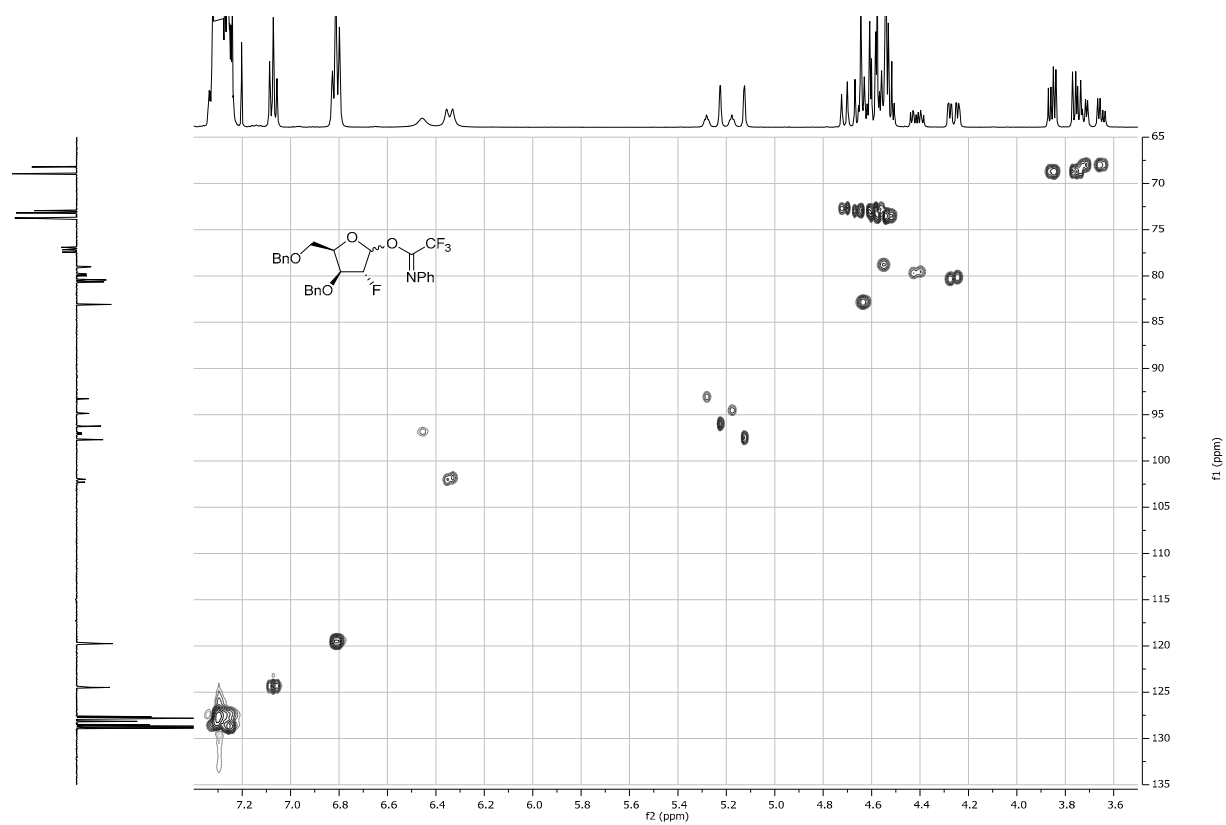

# Methyl (methyl 2,3-di-O-benzyl-β-D-ribofuranosyl uronate) (17)

<sup>1</sup>H NMR, 400 MHz, CDCl<sub>3</sub> of compound **17**

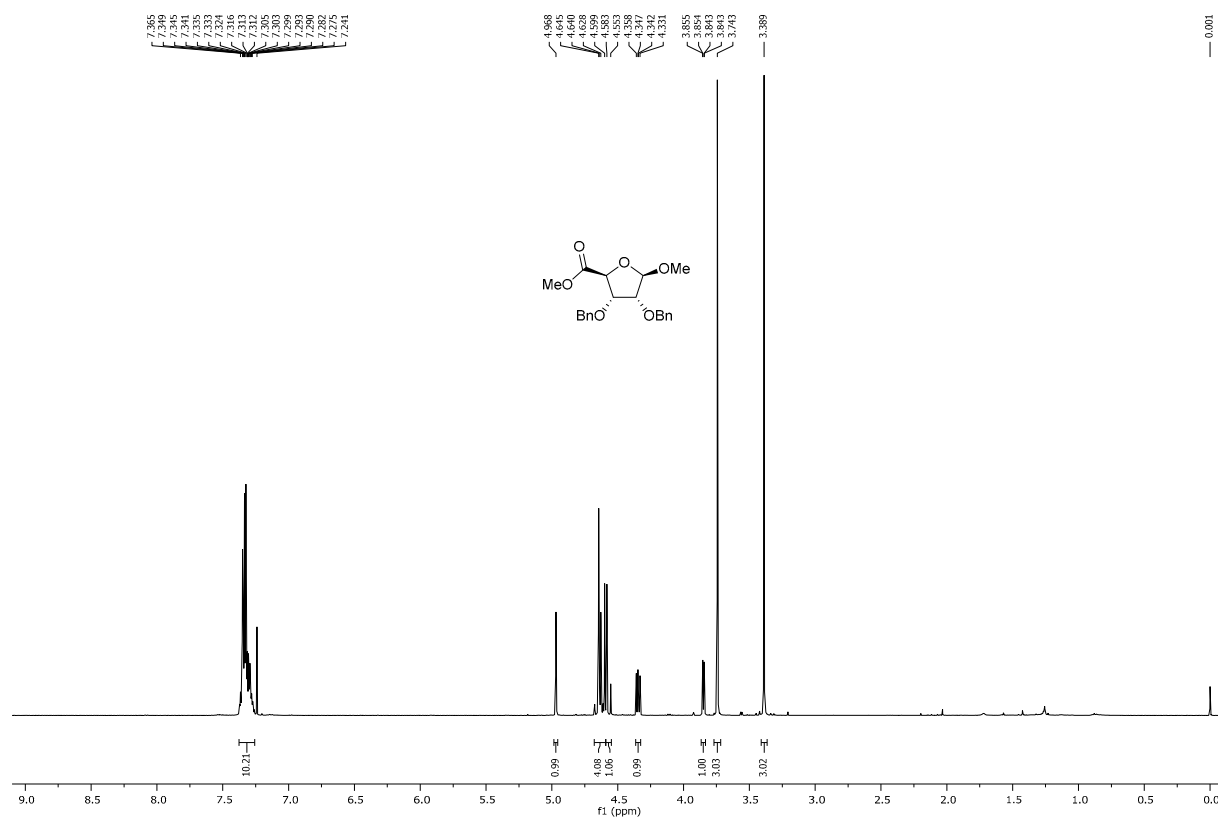

<sup>13</sup>C-APT NMR, 101 MHz, CDCl<sub>3</sub> of compound **17**

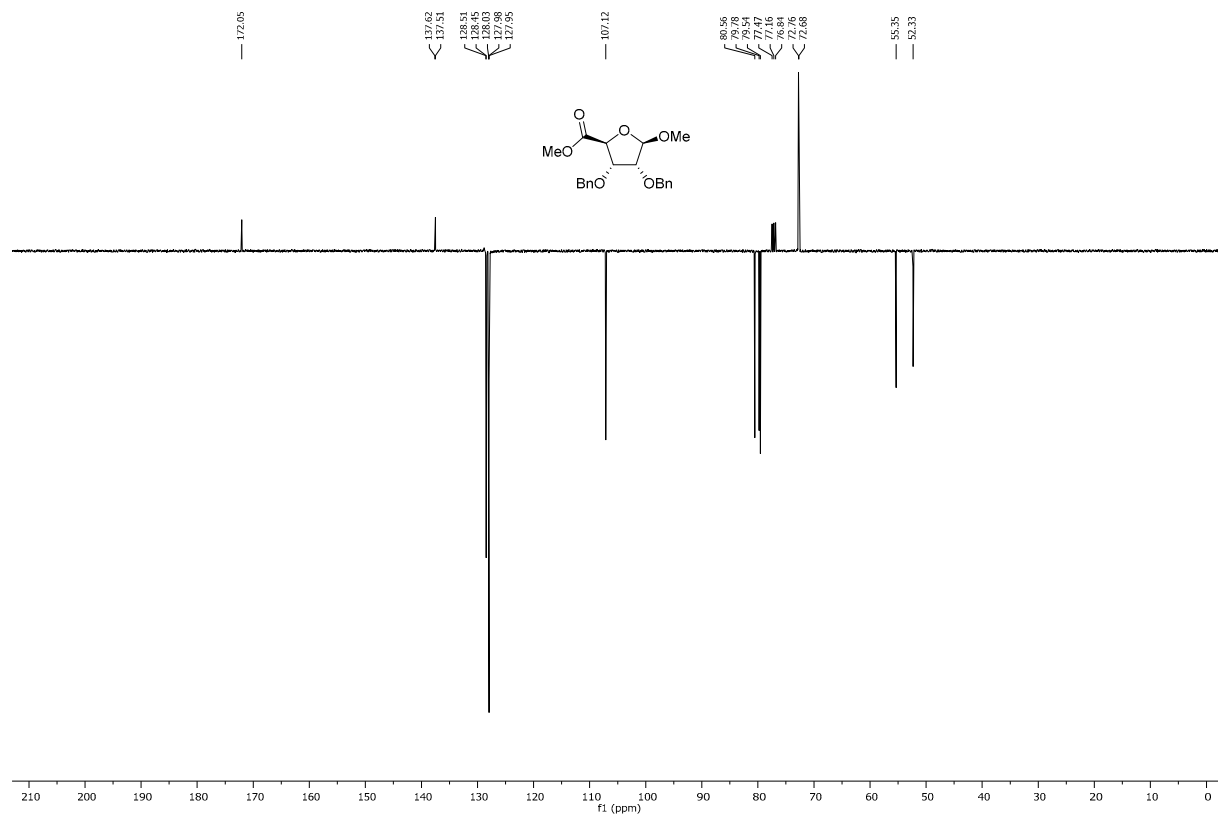

$^1\text{H}$ - $^1\text{H}$  COSY of compound **17**

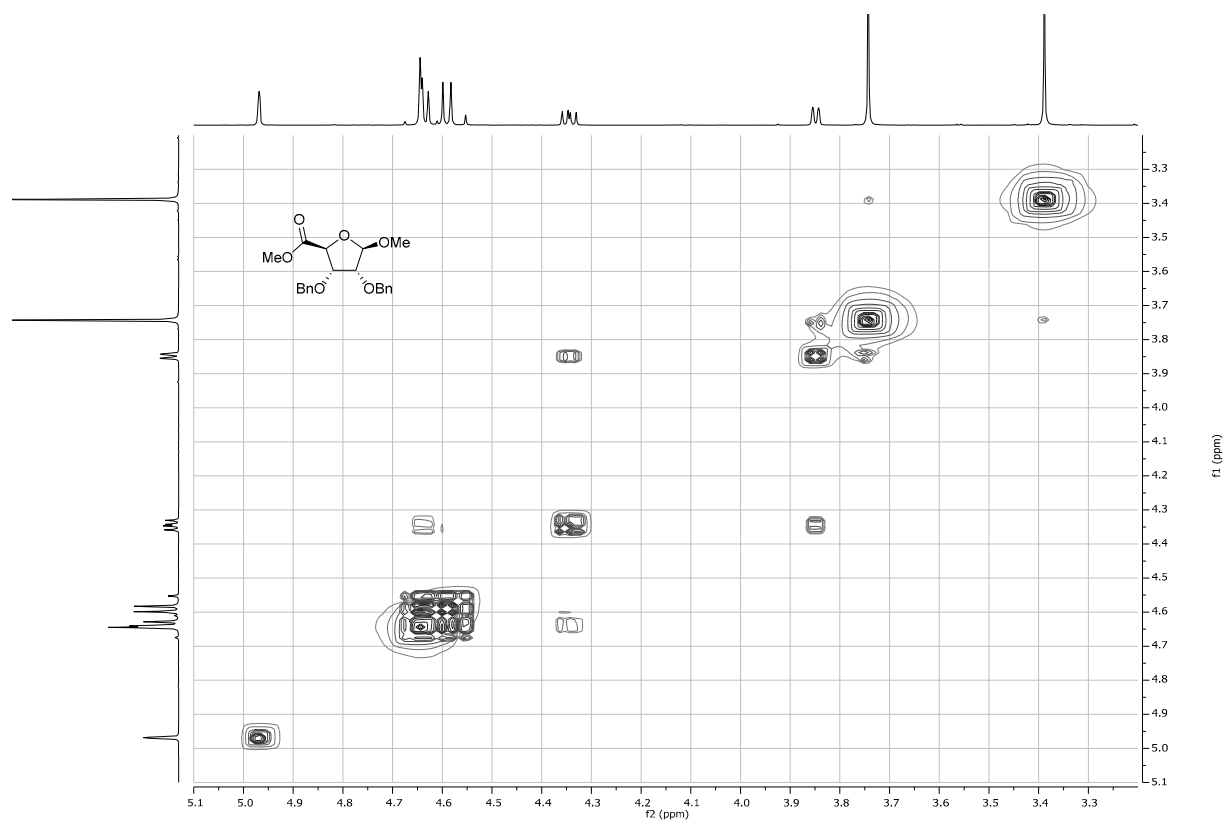

$^1\text{H}$ - $^{13}\text{C}$  HSQC of compound **17**

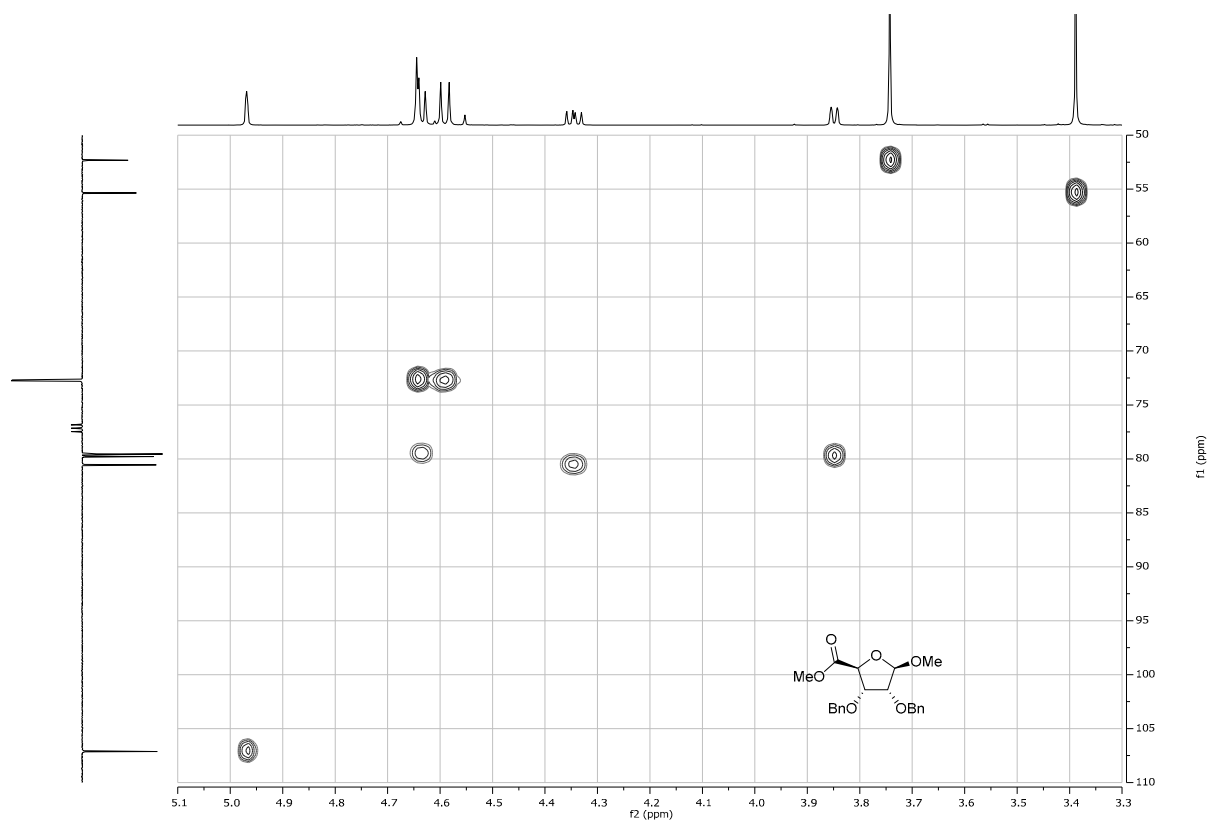

Methyl (methyl 2,3-di-O-benzyl- $\alpha/\beta$ -D-arabinofuranosyl uronate) (**18**)

$^1\text{H}$  NMR, 400 MHz,  $\text{CDCl}_3$  of compound **18**

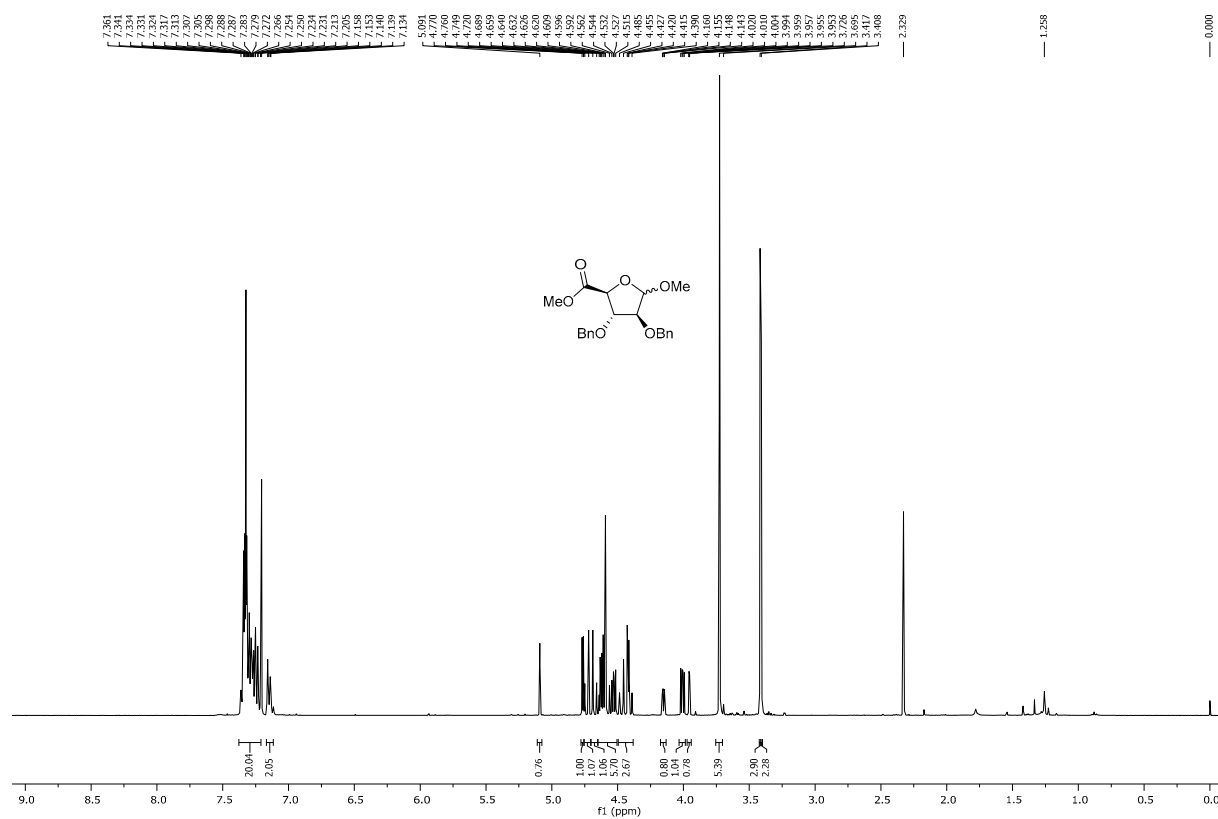

$^{13}\text{C}$ -APT NMR, 101 MHz,  $\text{CDCl}_3$  of compound **18**

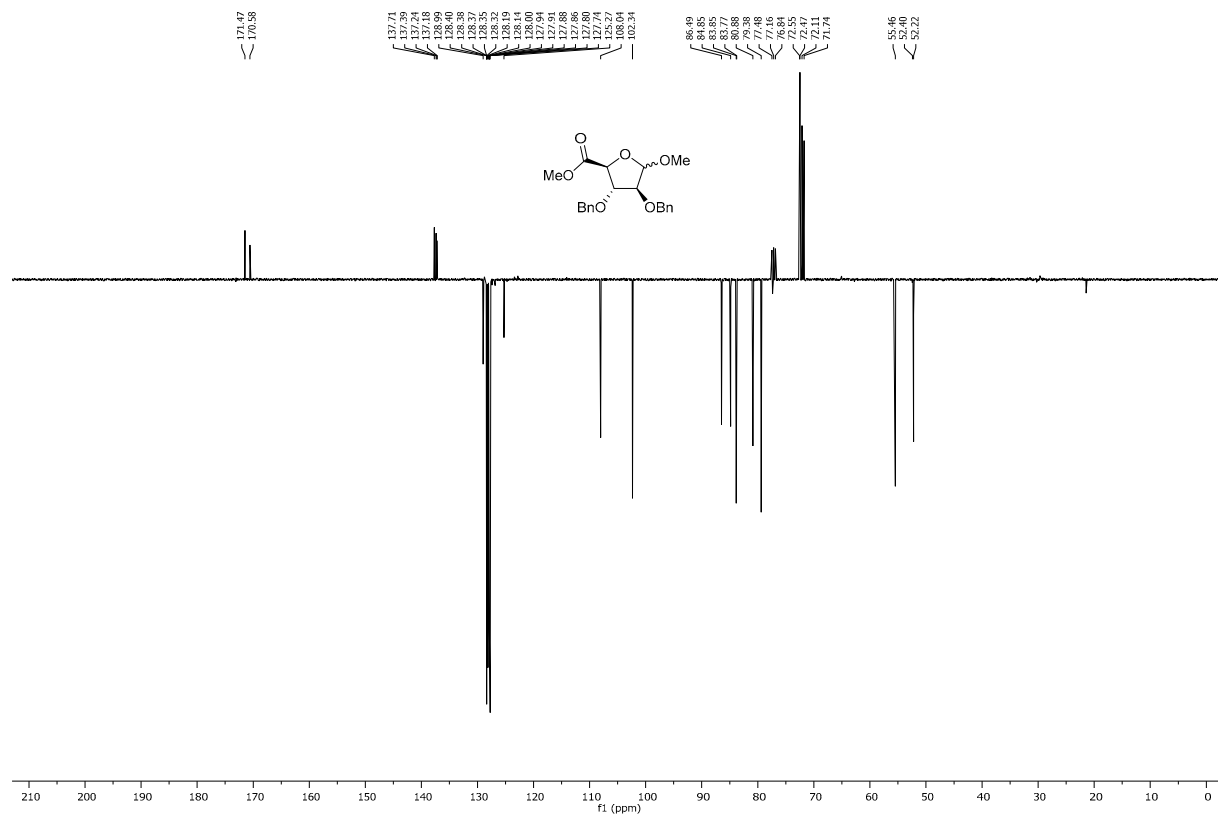

$^1\text{H}$ - $^1\text{H}$  COSY of compound **18**

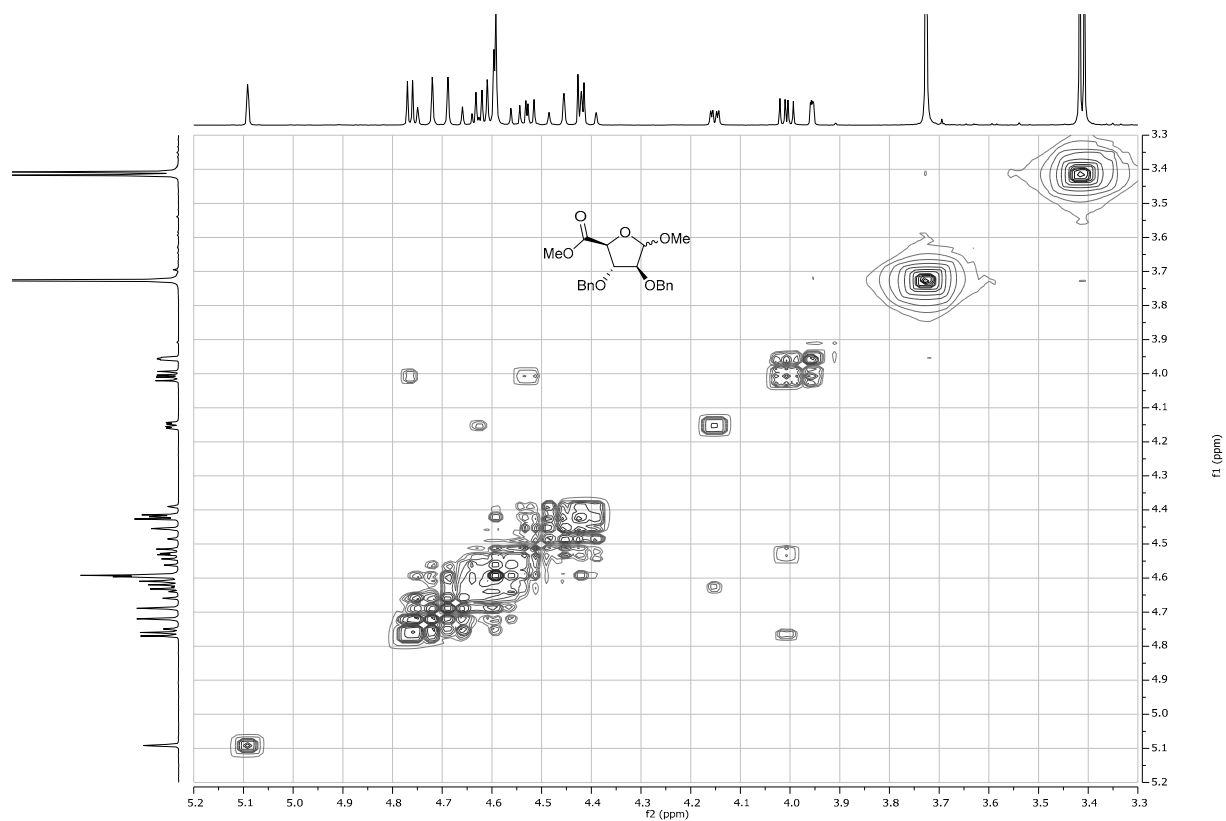

$^1\text{H}$ - $^{13}\text{C}$  HSQC of compound **18**

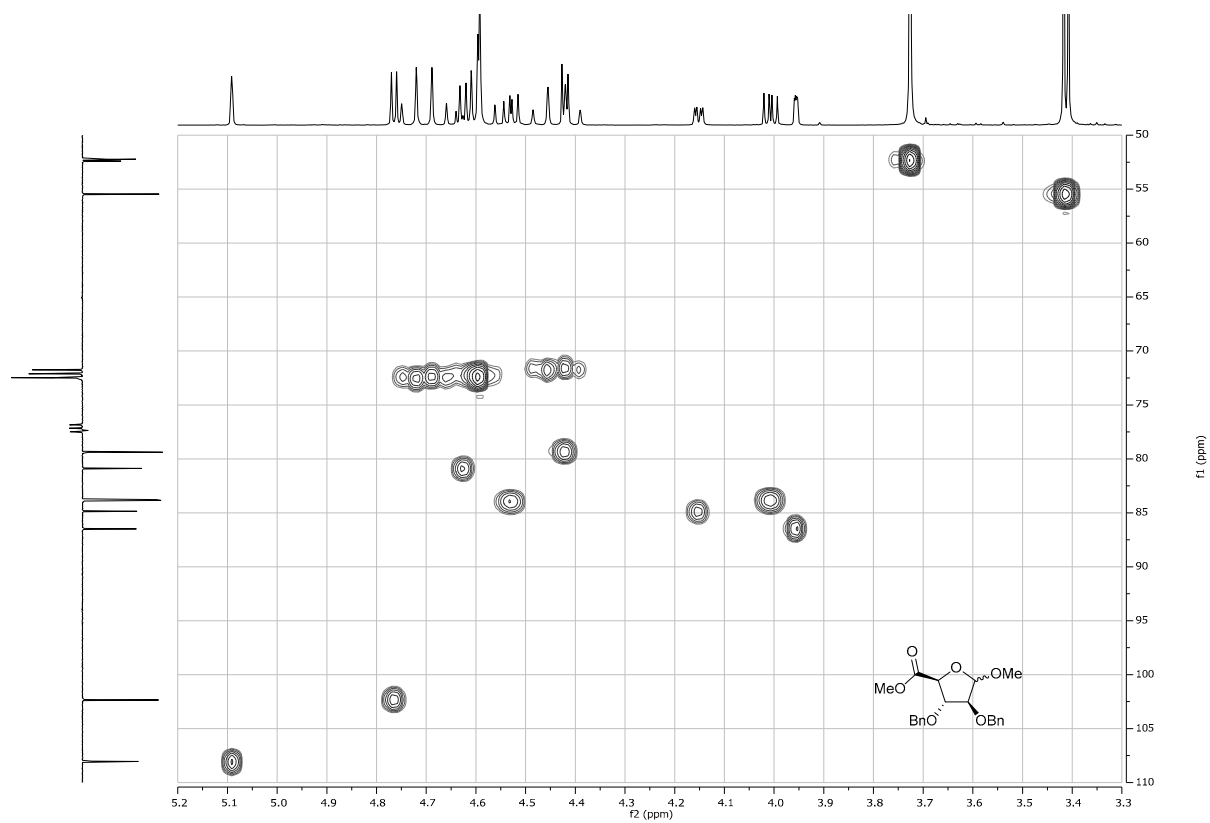

# Methyl (methyl 2,3-di-O-benzyl- $\alpha$ -D-lyxofuranosyl uronate) (19)

$^1\text{H}$  NMR, 500 MHz,  $\text{CDCl}_3$  of compound **19**

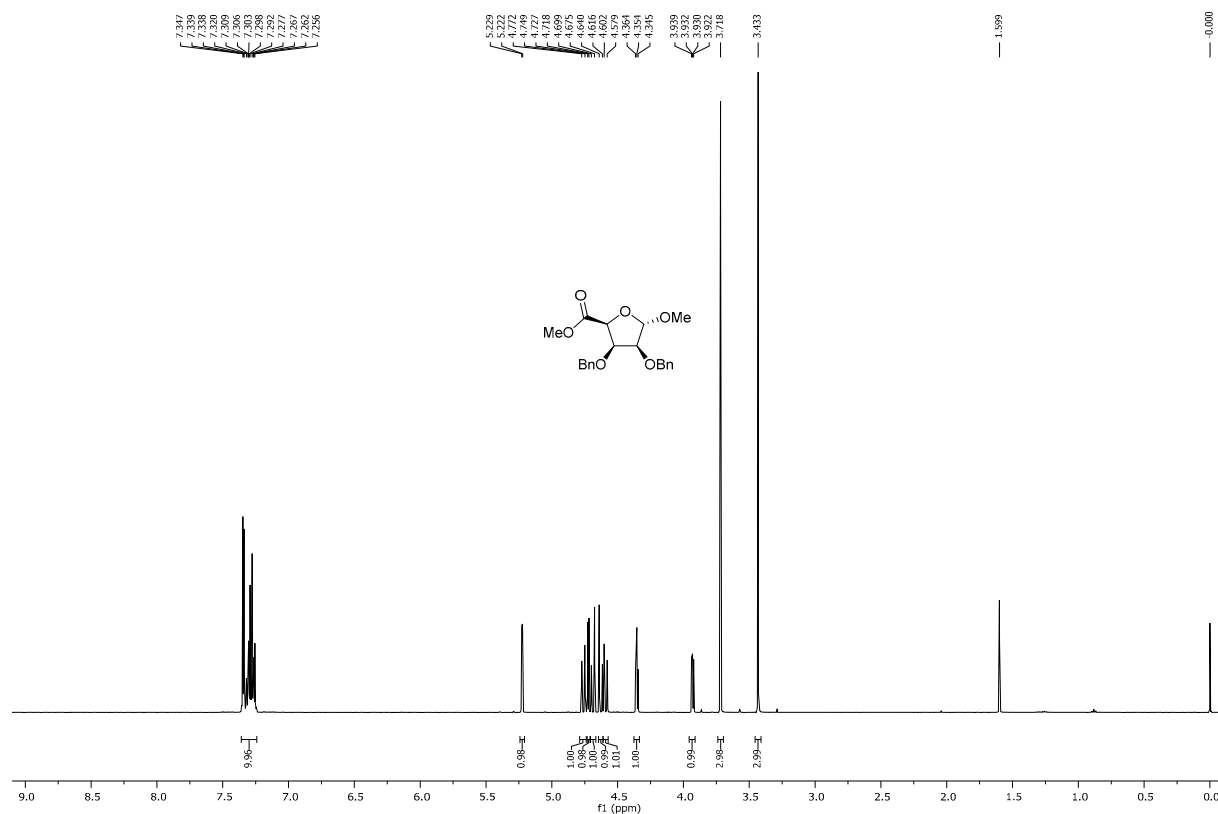

$^{13}\text{C}$ -APT NMR, 126 MHz,  $\text{CDCl}_3$  of compound **19**

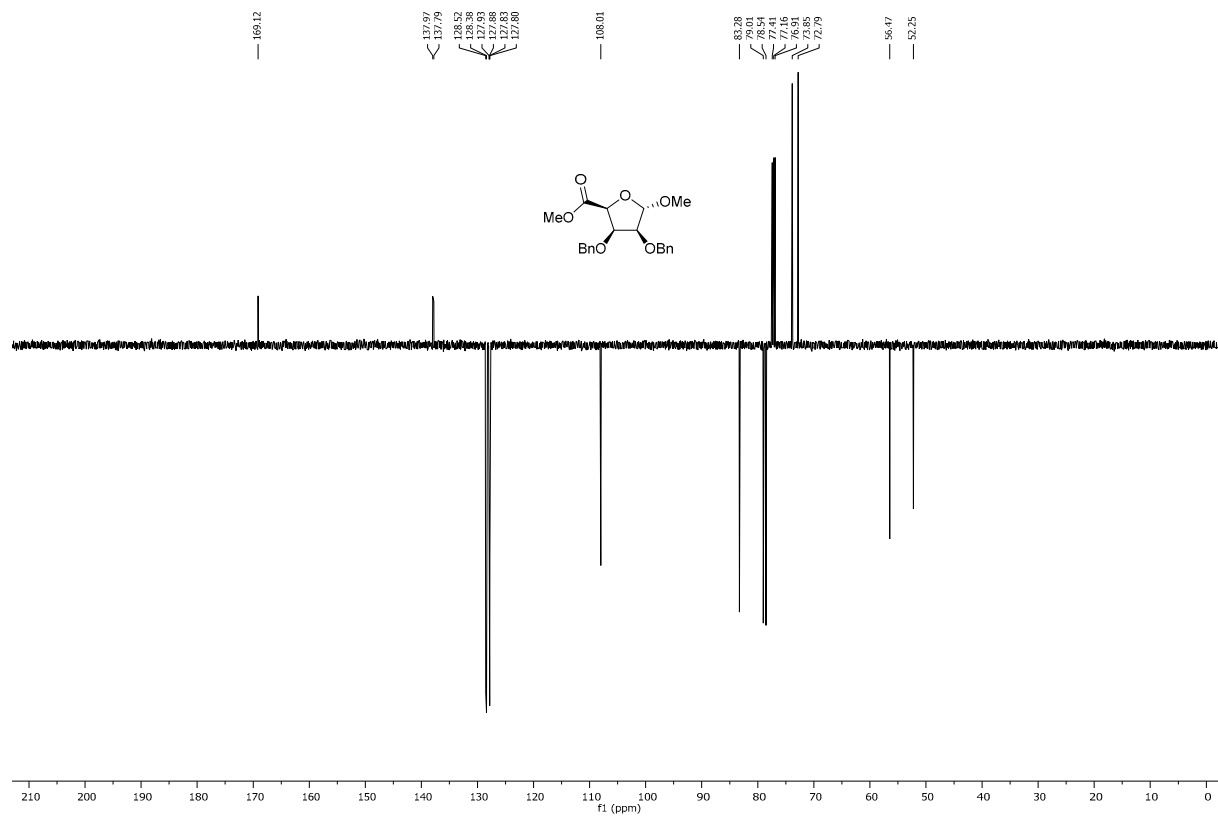



$^1\text{H}$ - $^1\text{H}$  COSY of compound **19**

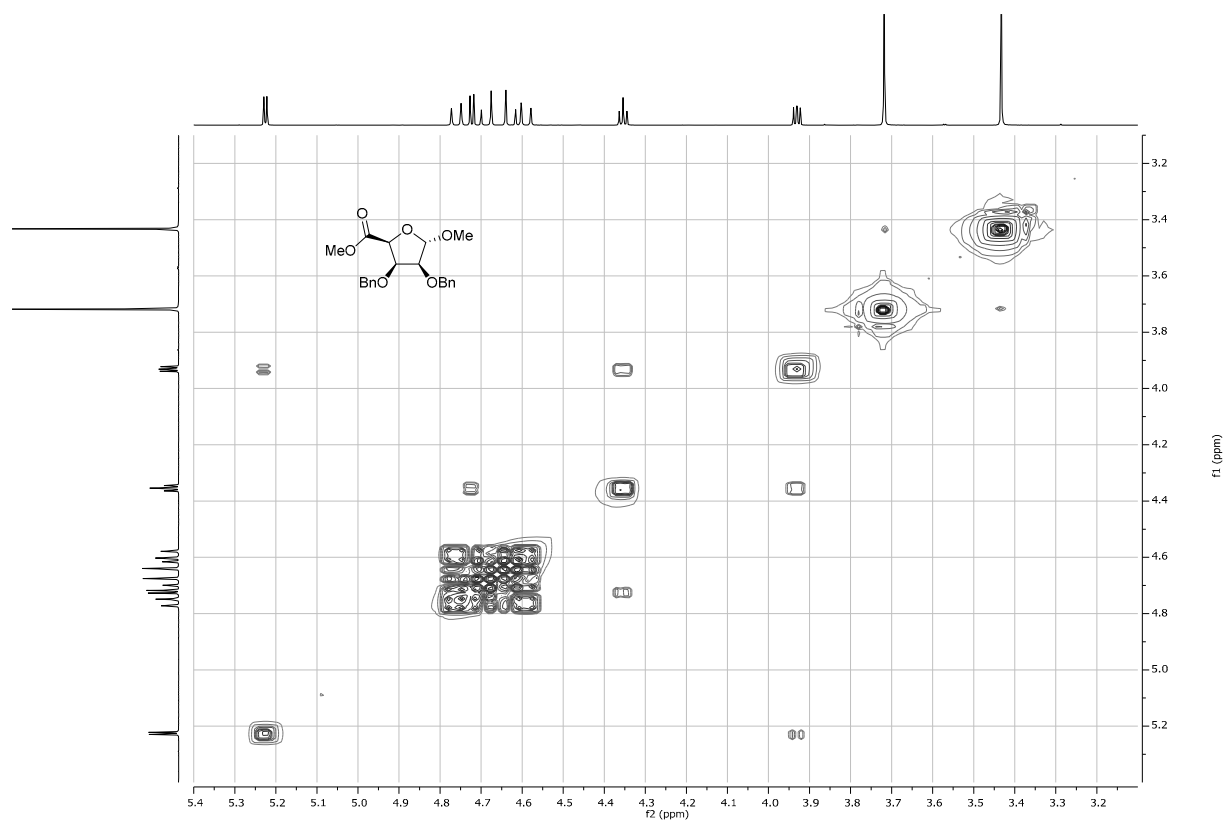

$^1\text{H}$ - $^{13}\text{C}$  HSQC of compound **19**

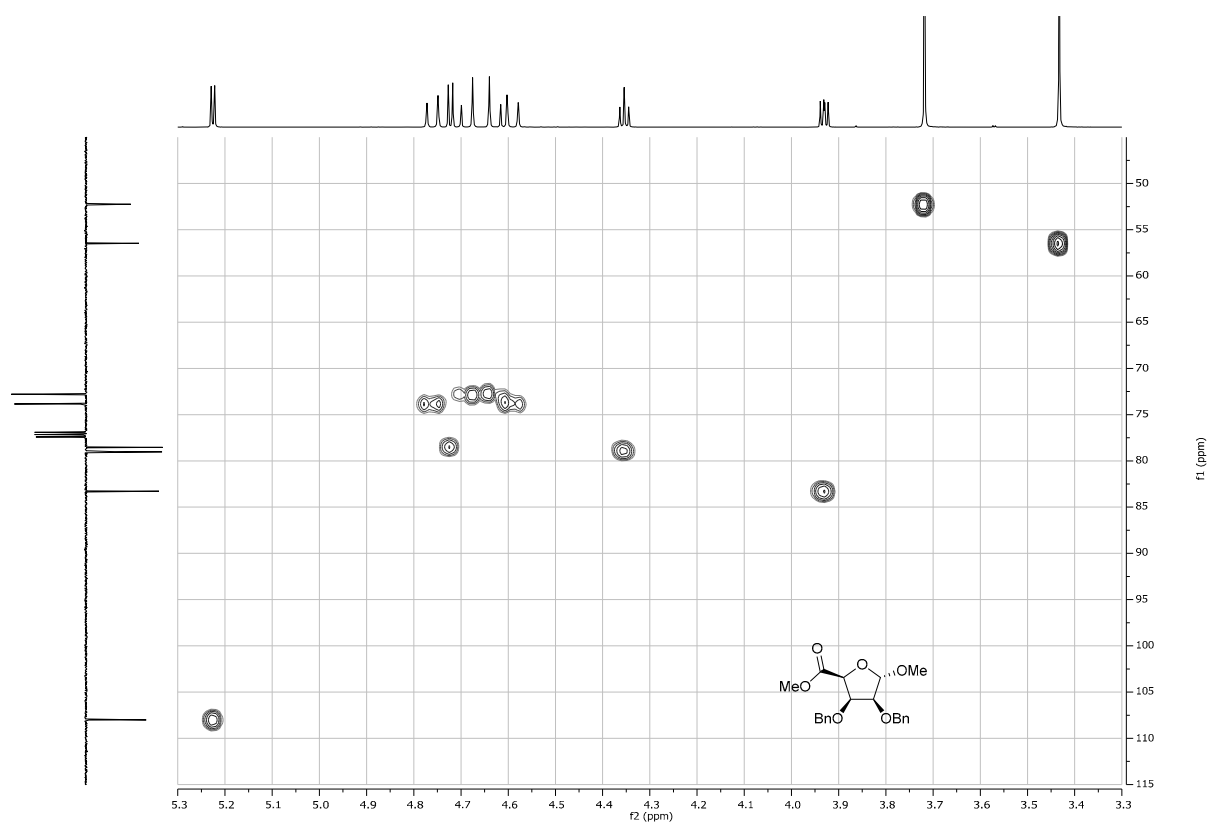

$^1\text{H}$ - $^1\text{H}$  NOESY of compound **19**

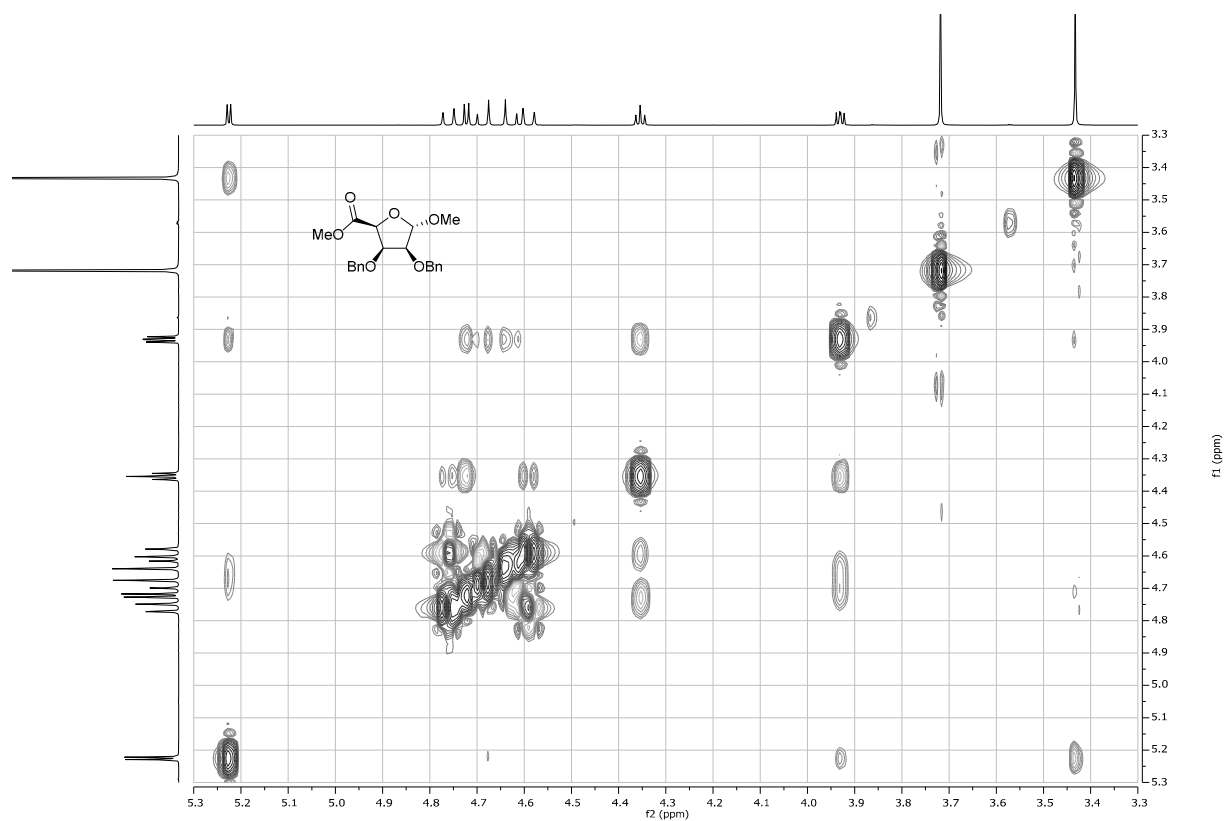

$^1\text{H}$ - $^{13}\text{C}$  HSQC-HECADE of compound **19**

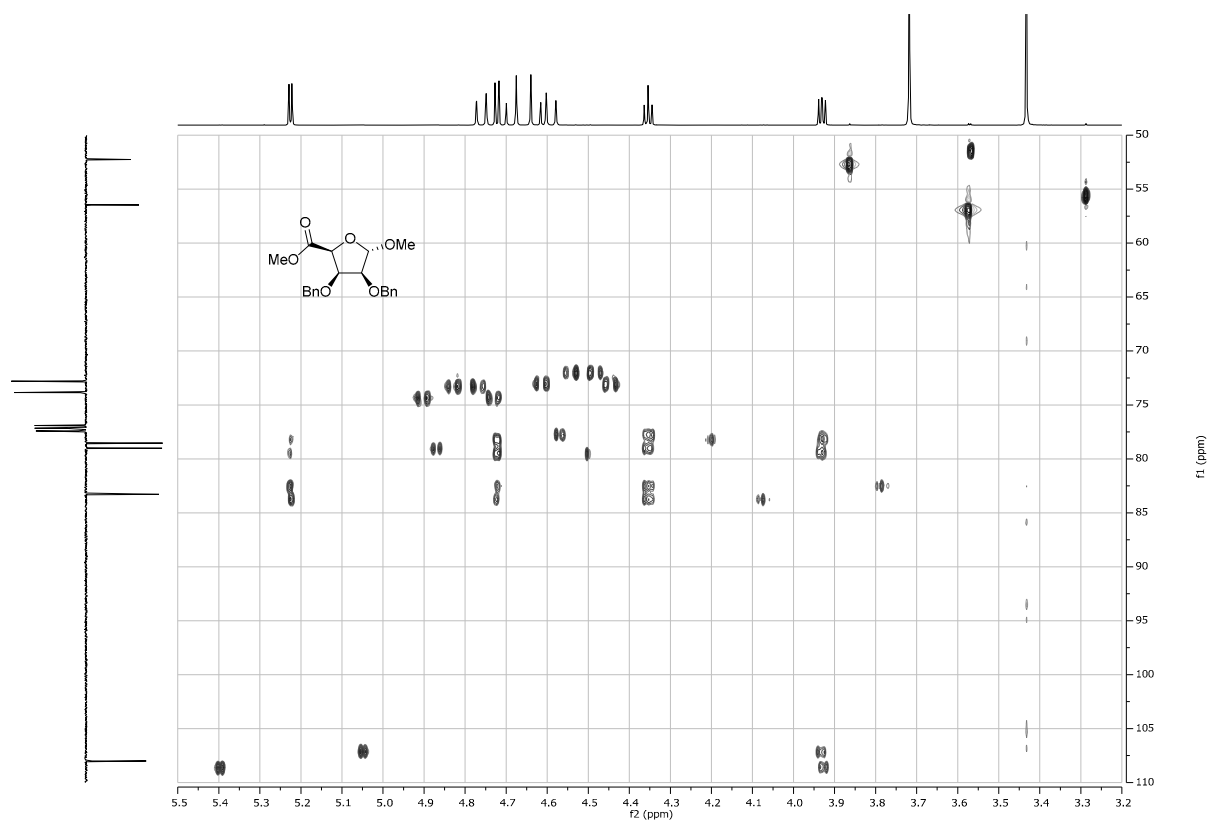

Methyl (methyl 2,3-di-O-benzyl- $\alpha/\beta$ -D-xylofuranosyl uronate) (20)

$^1\text{H}$  NMR, 400 MHz,  $\text{CDCl}_3$  of compound 20

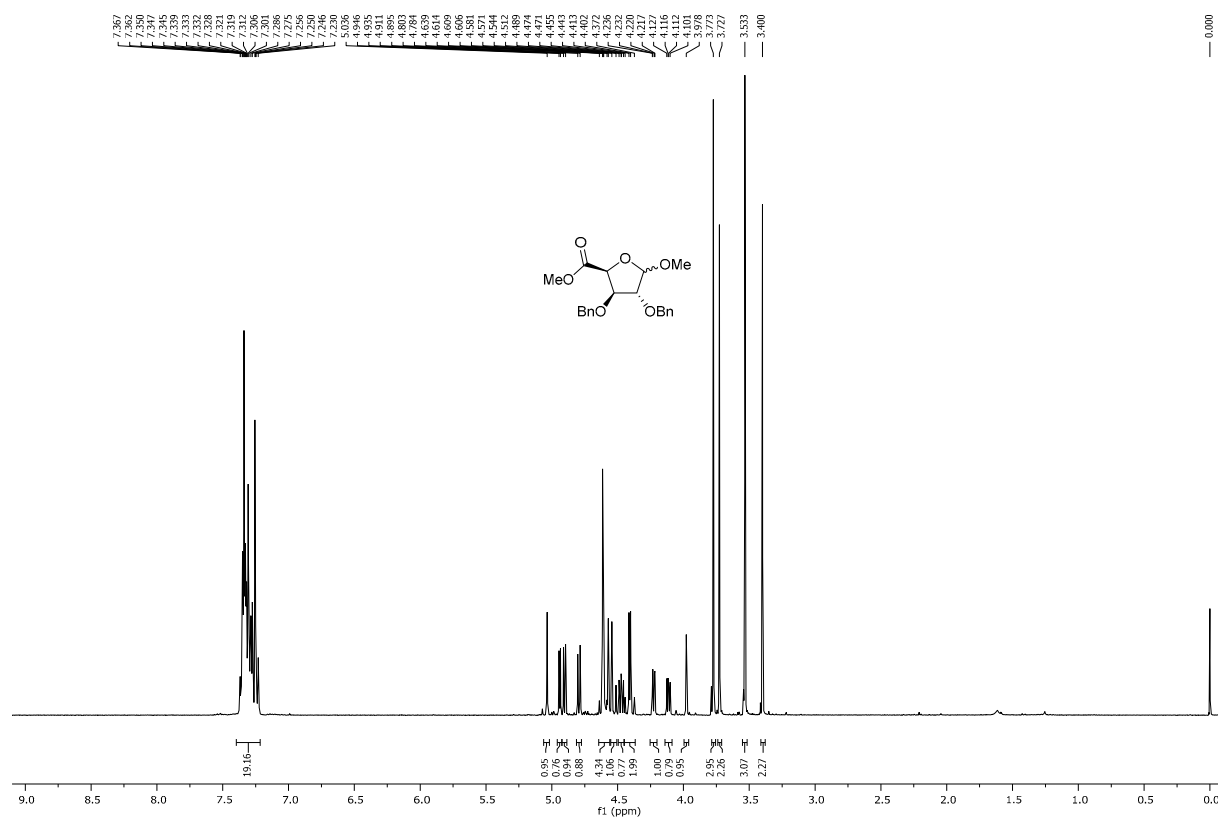

$^{13}\text{C}$ -APT NMR, 101 MHz,  $\text{CDCl}_3$  of compound 20

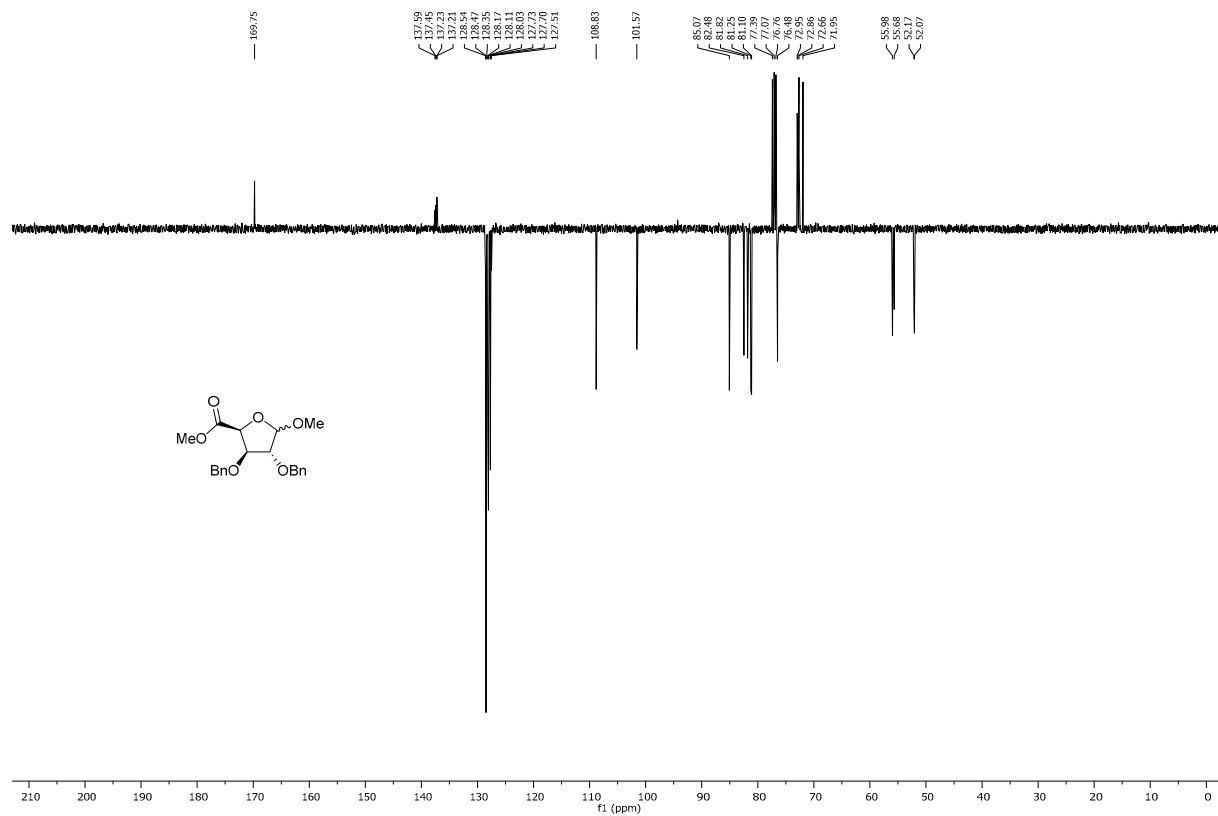

$^1\text{H}$ - $^1\text{H}$  COSY of compound **20**

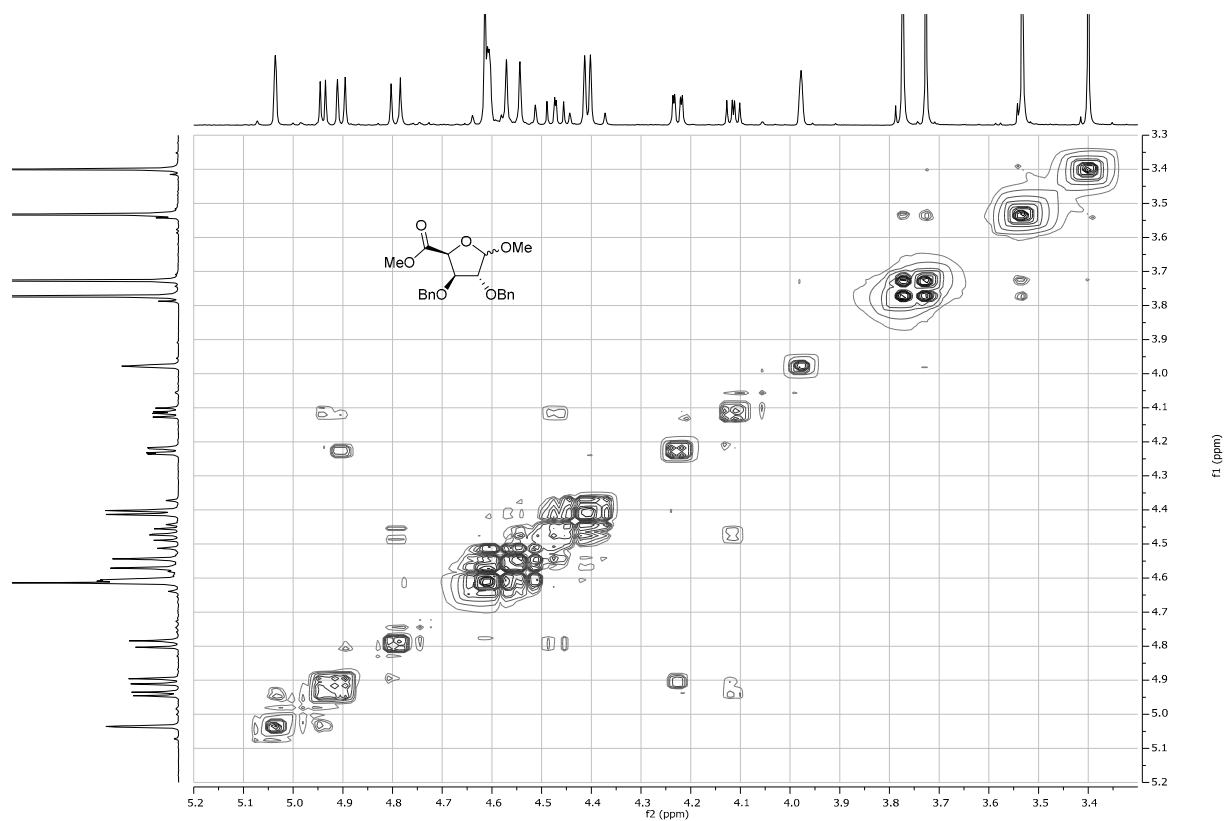

$^1\text{H}$ - $^{13}\text{C}$  HSQC of compound **20**

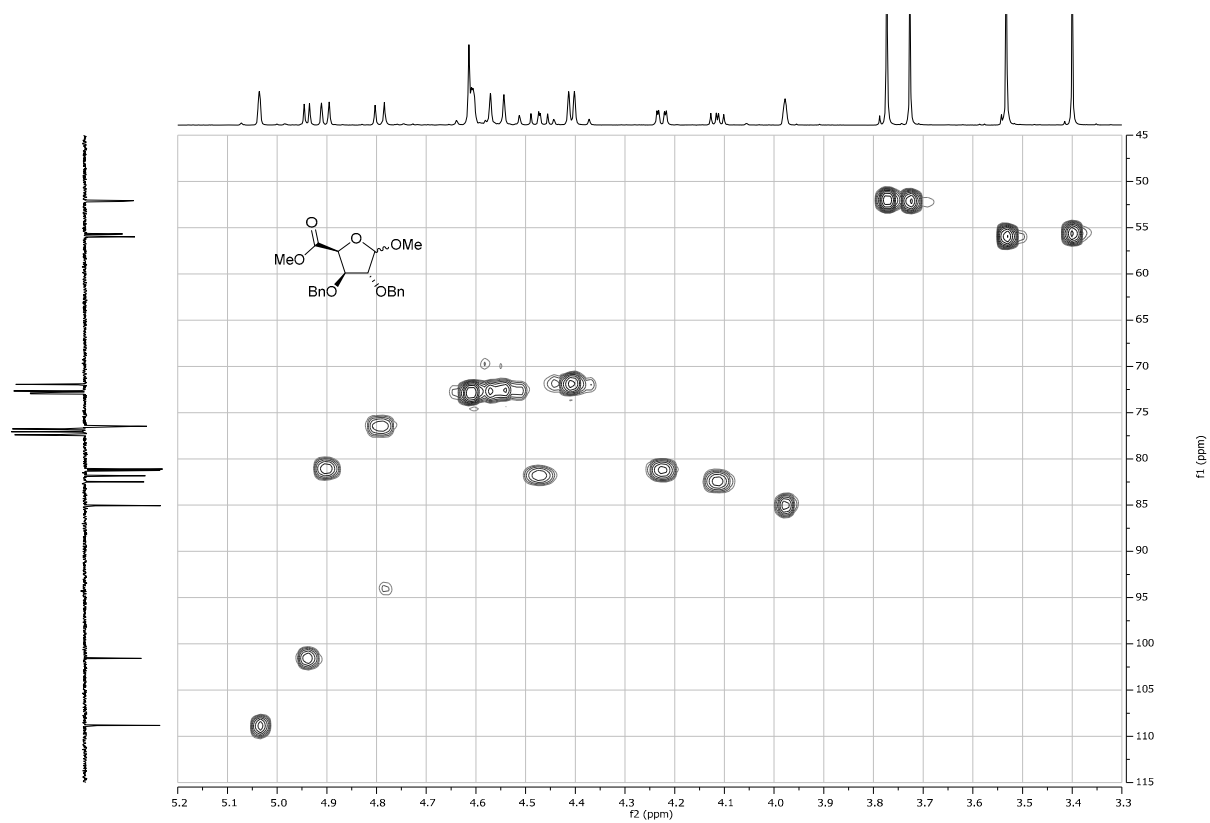

Methyl (2,3-di-O-benzyl- $\alpha/\beta$ -D-ribofuranosyl uronate) (21)

$^1\text{H}$  NMR, 400 MHz,  $\text{CDCl}_3$  of compound **21**

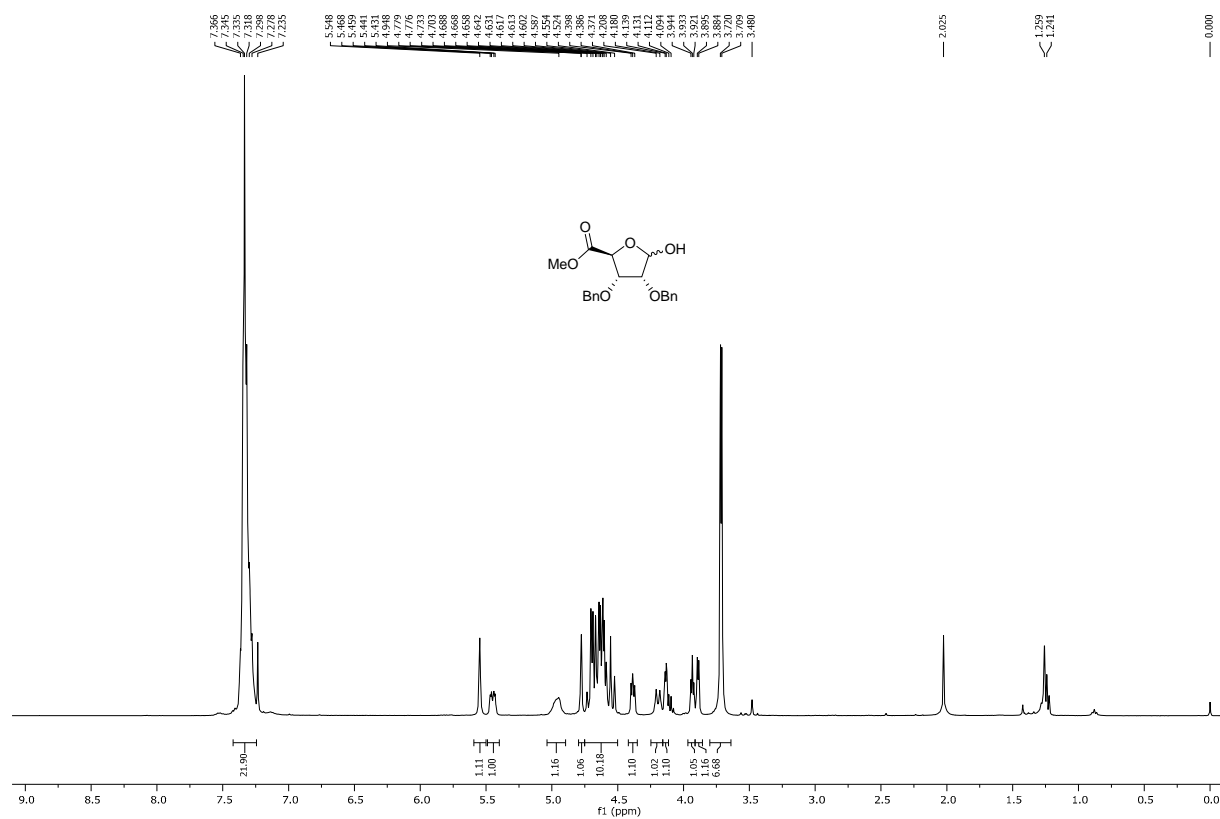

$^{13}\text{C}$ -APT NMR, 101 MHz,  $\text{CDCl}_3$  of compound **21**

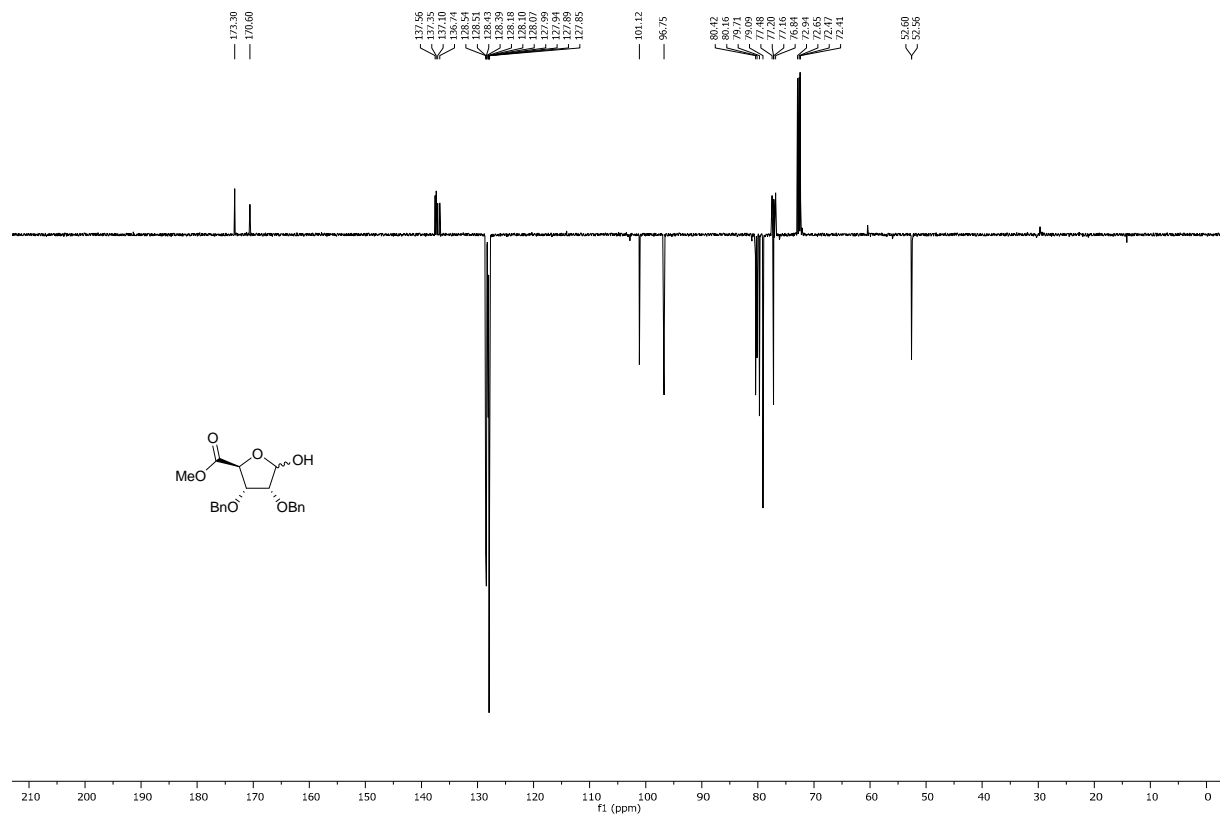

$^1\text{H}$ - $^1\text{H}$  COSY of compound **21**

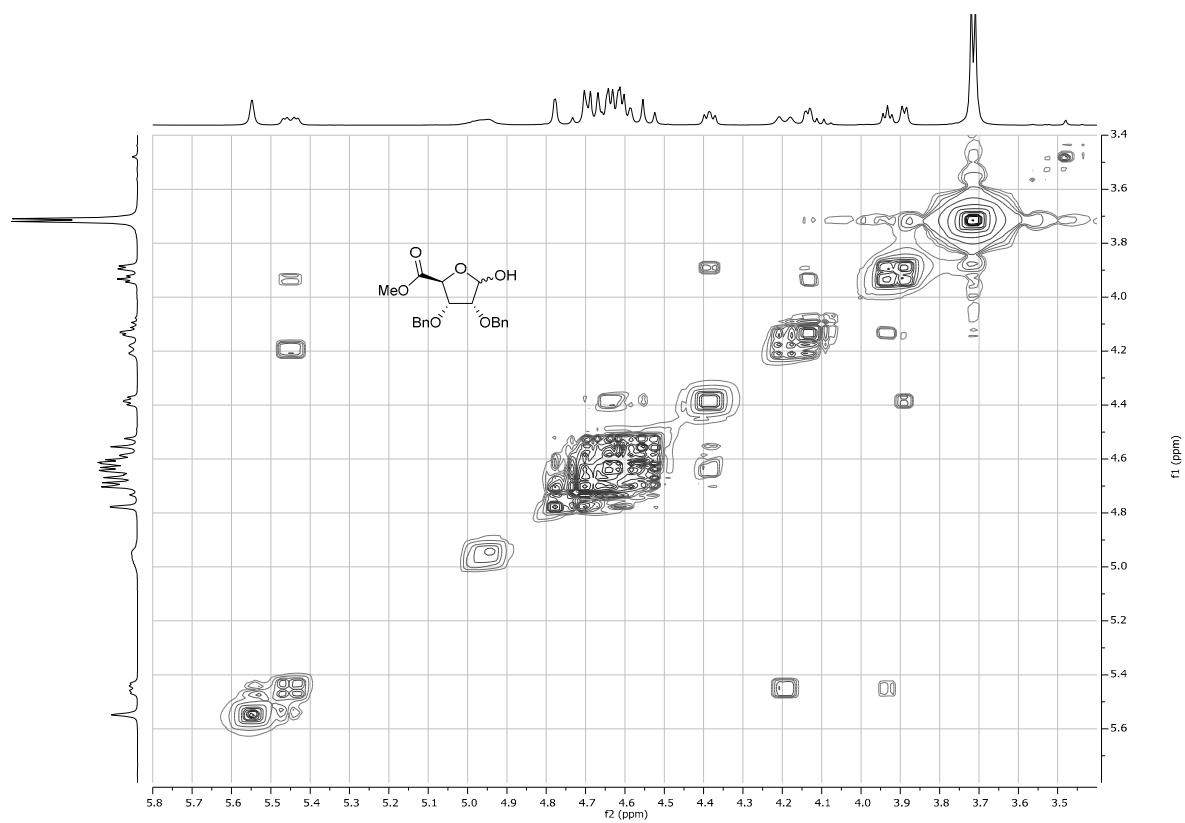

$^1\text{H}$ - $^{13}\text{C}$  HSQC of compound **21**

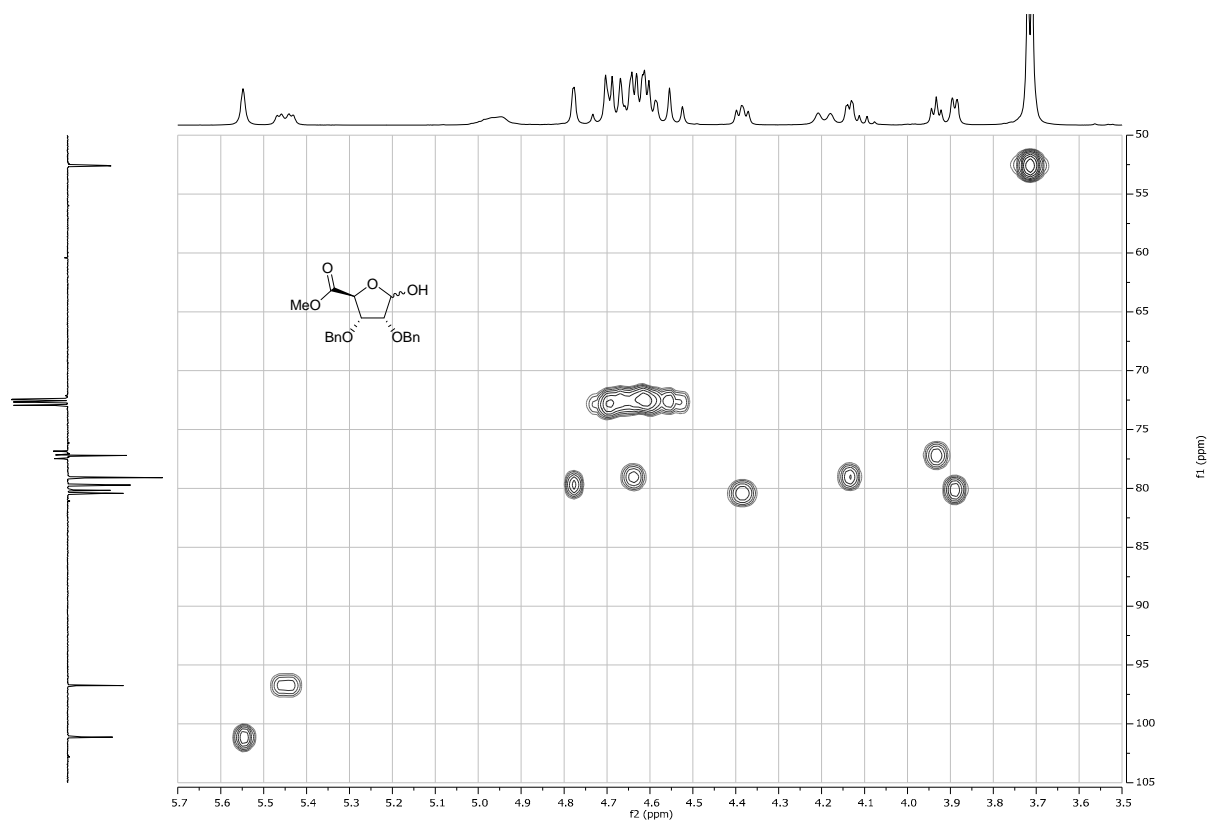

$^1\text{H}$ - $^1\text{H}$  NOESY of compound **21**

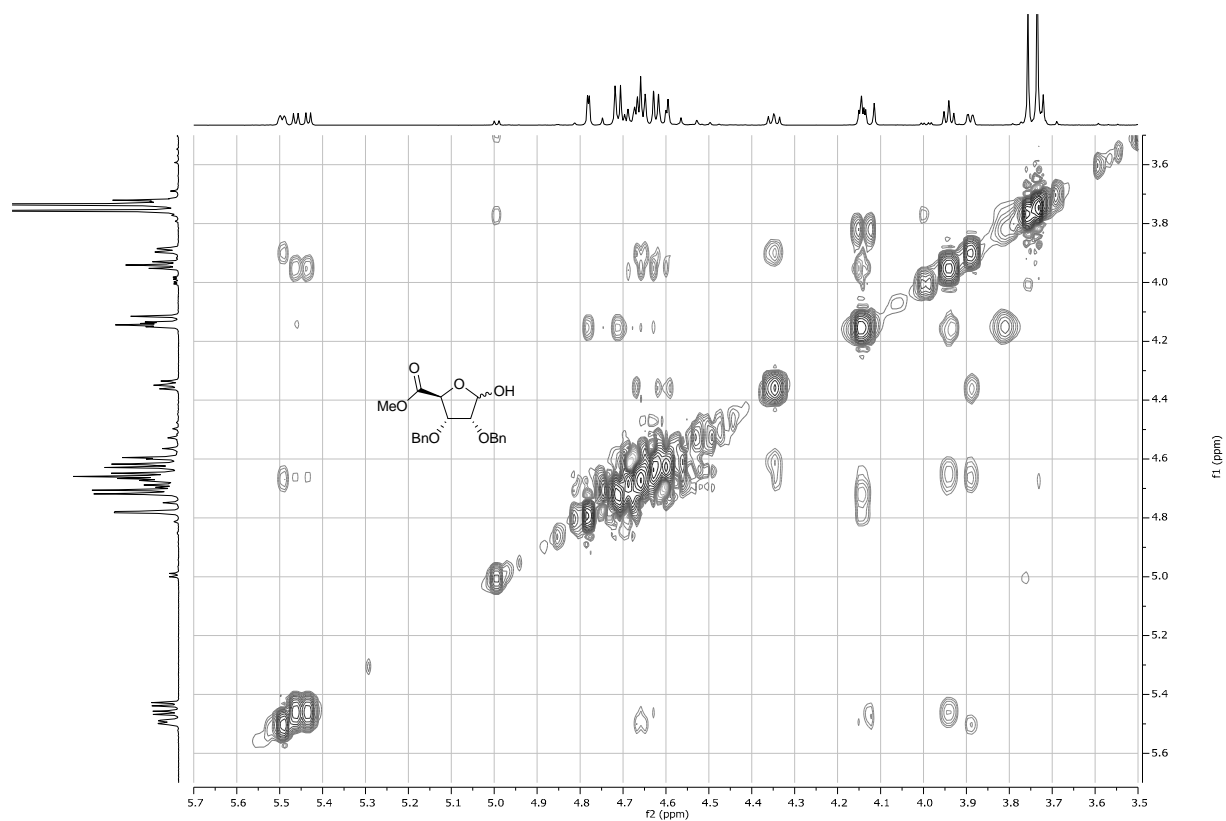

Methyl (2,3-di-*O*-benzyl- $\alpha/\beta$ -D-arabinofuranosyl uronate) (**22**)

$^1\text{H}$  NMR, 400 MHz,  $\text{CDCl}_3$  of compound **22**

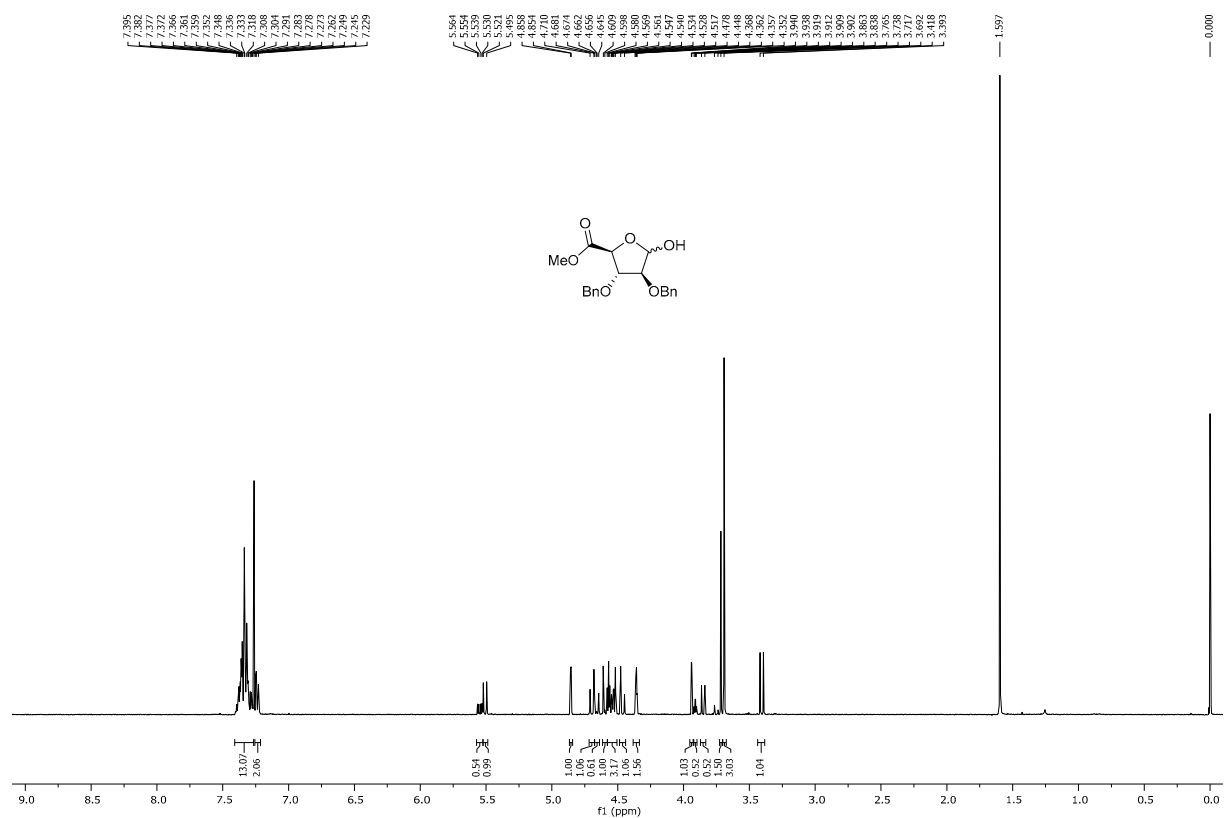

$^{13}\text{C}$ -APT NMR, 101 MHz,  $\text{CDCl}_3$  of compound **22**

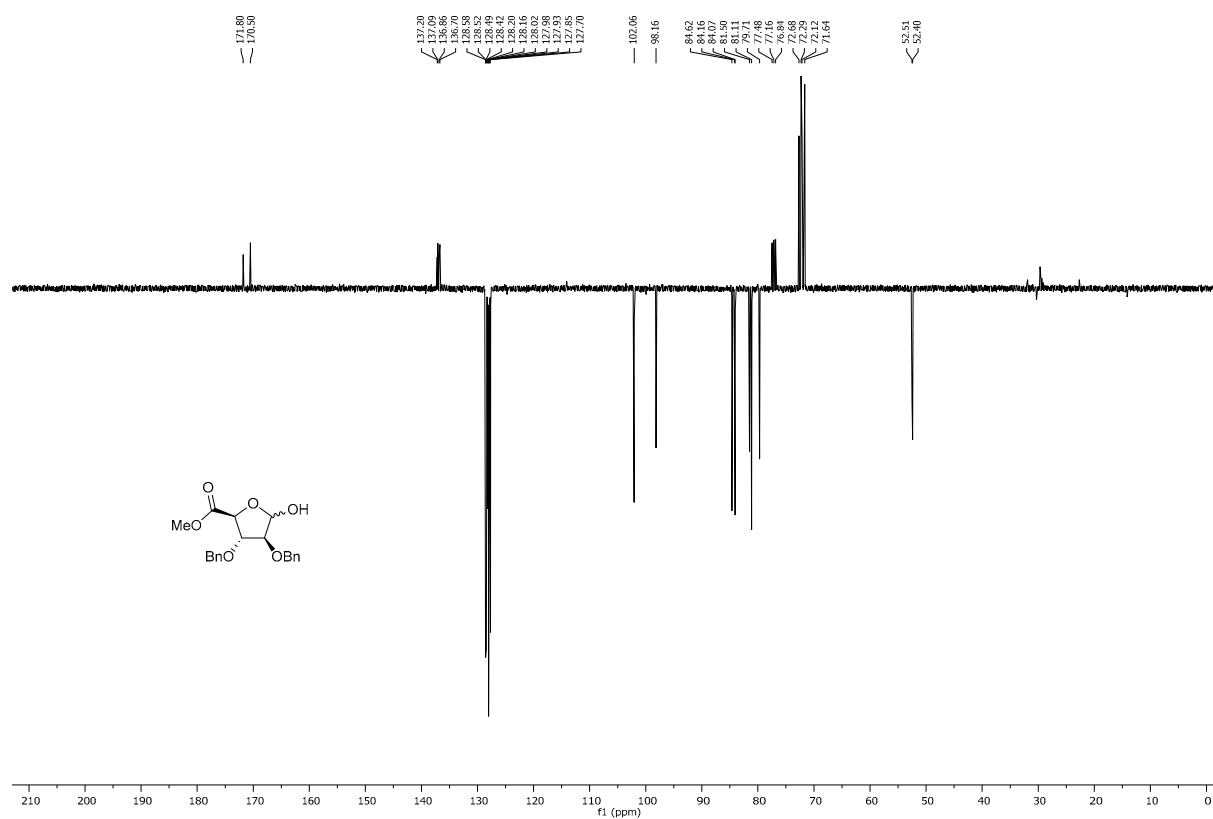

$^1\text{H}$ - $^1\text{H}$  COSY of compound **22**

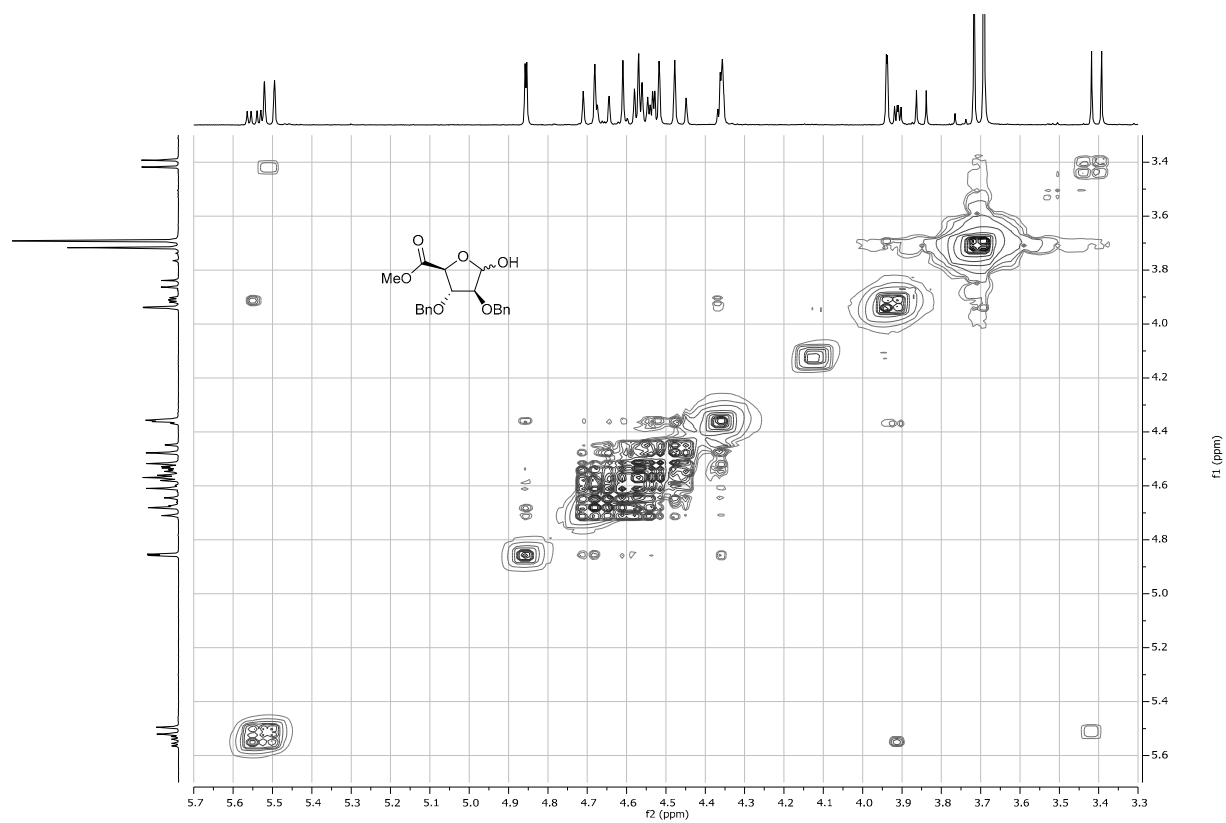



$^1\text{H}$ - $^{13}\text{C}$  HSQC of compound **22**

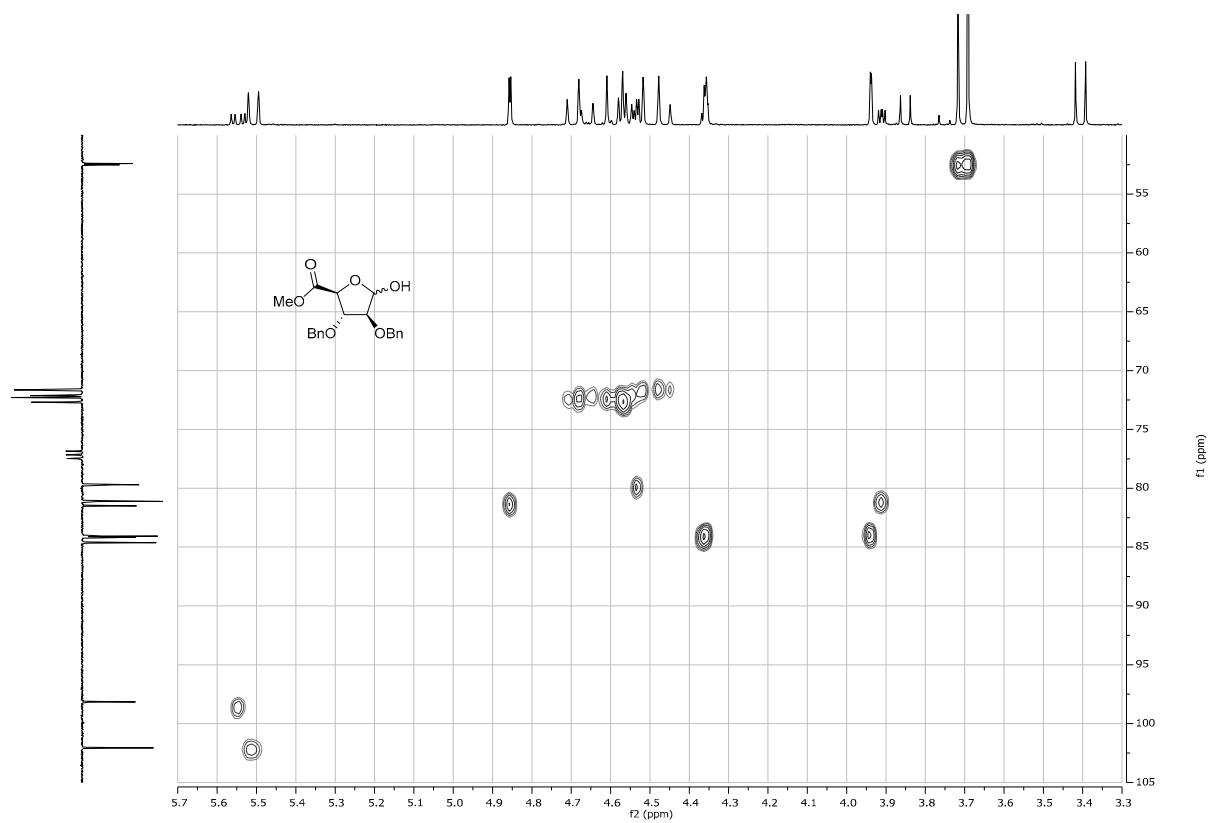

$^1\text{H}$ - $^1\text{H}$  NOESY of compound **22**

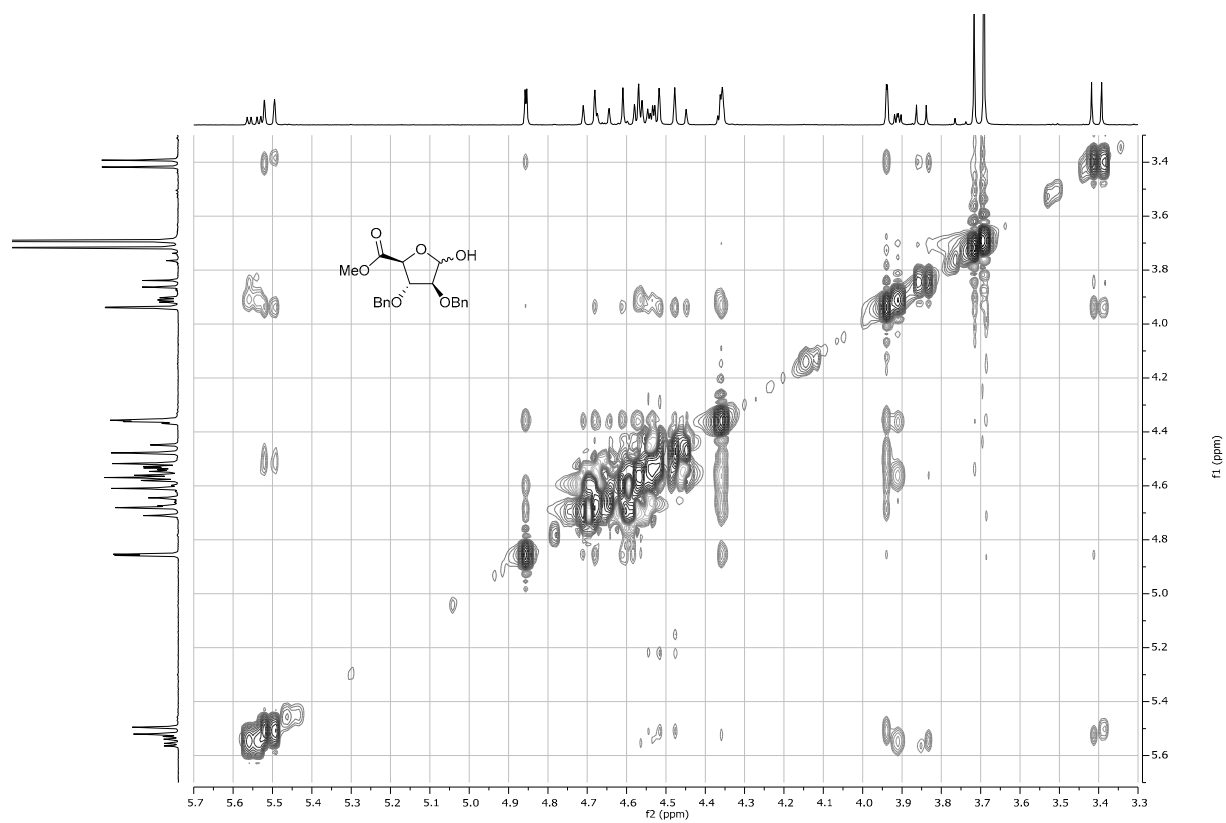

Methyl (2,3-di-O-benzyl- $\alpha/\beta$ -D-lyxofuranosyl uronate) (23)

$^1\text{H}$  NMR, 400 MHz,  $\text{CDCl}_3$  of compound 23

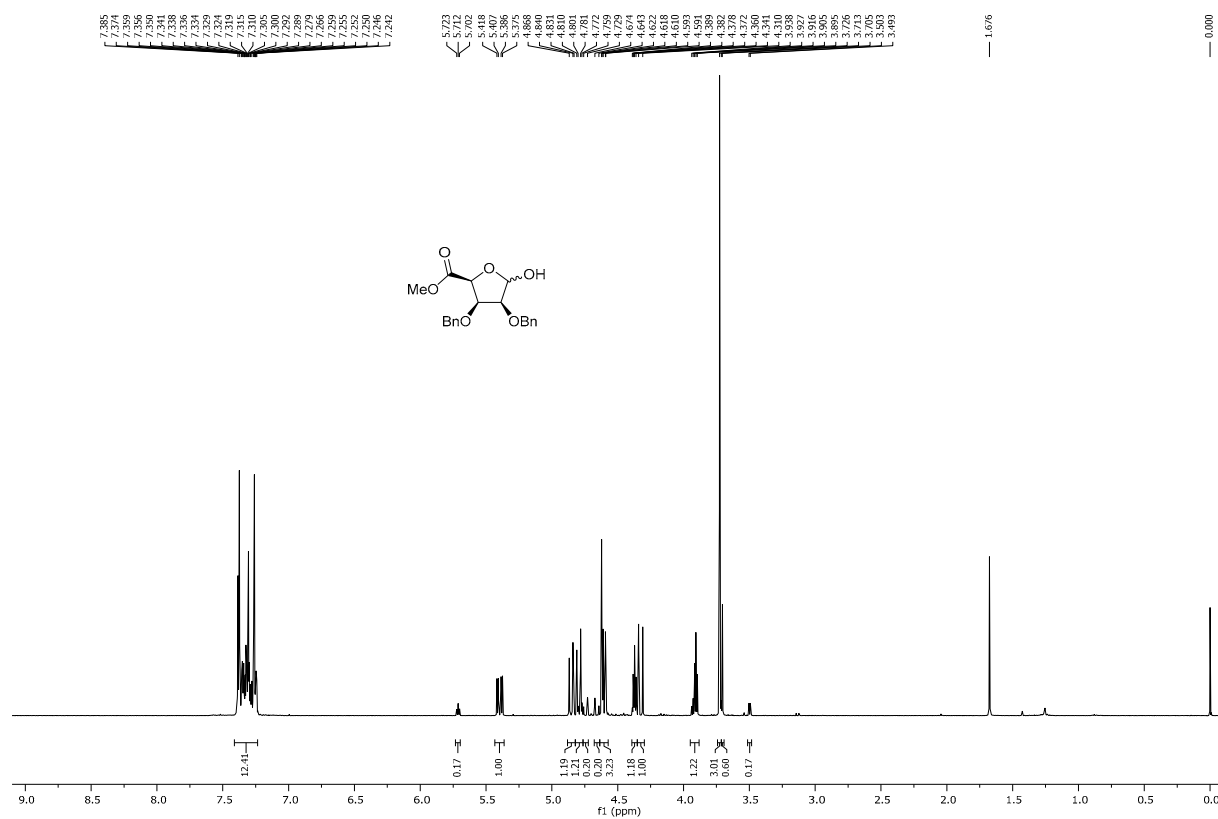

$^{13}\text{C}$ -APT NMR, 101 MHz,  $\text{CDCl}_3$  of compound 23

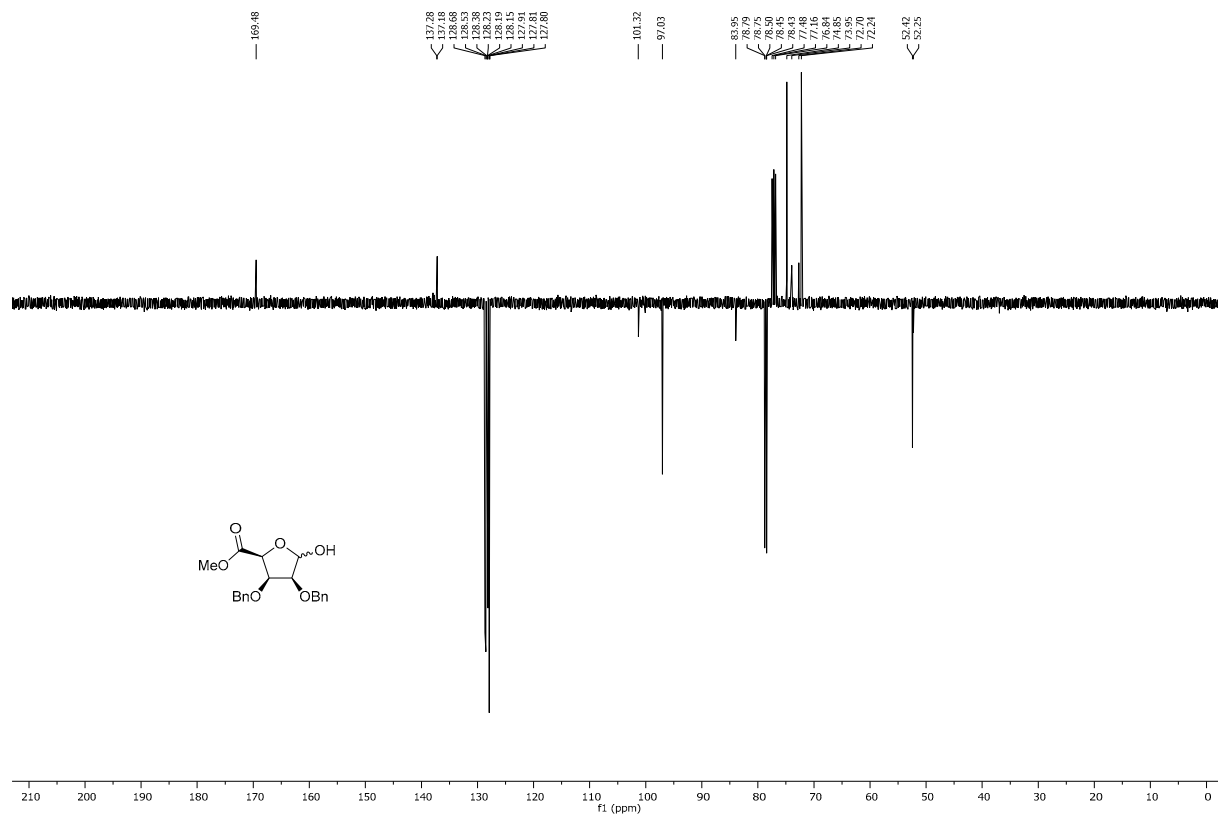

$^1\text{H}$ - $^1\text{H}$  COSY of compound **23**

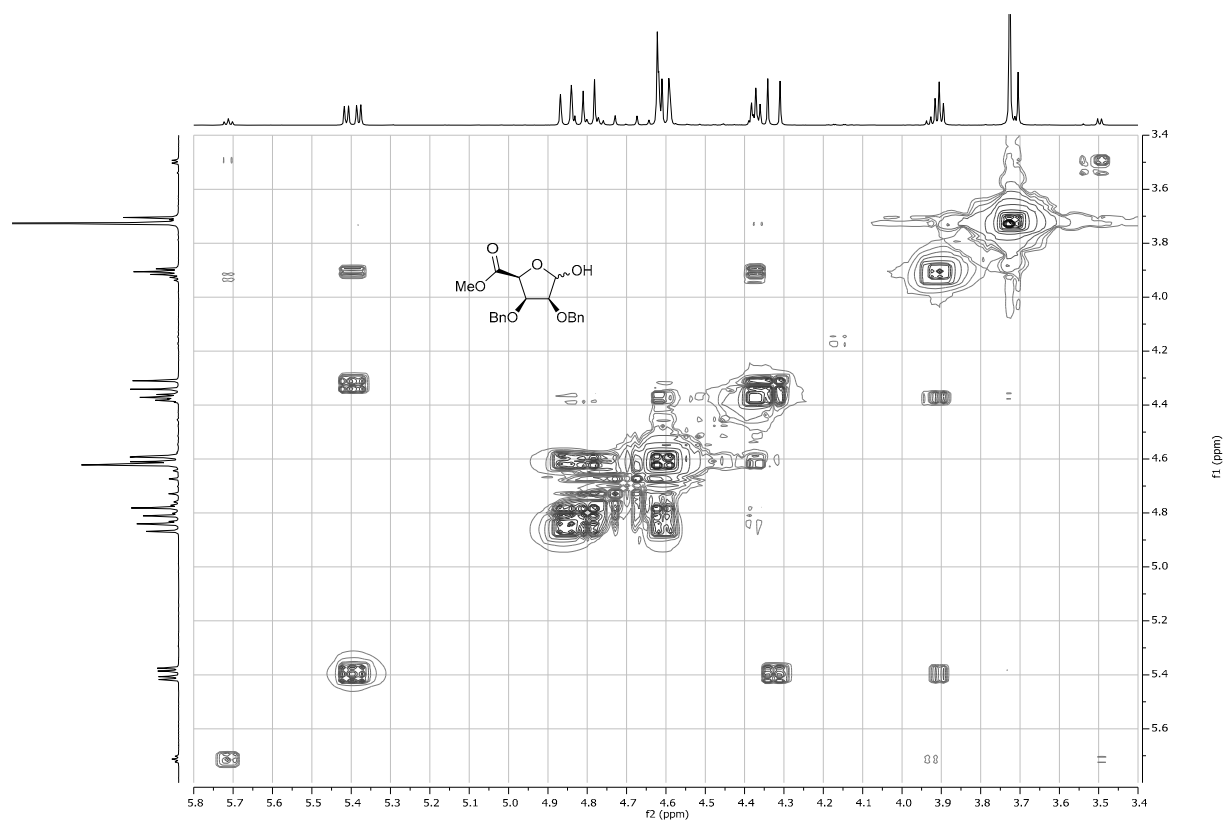

$^1\text{H}$ - $^{13}\text{C}$  HSQC of compound **23**

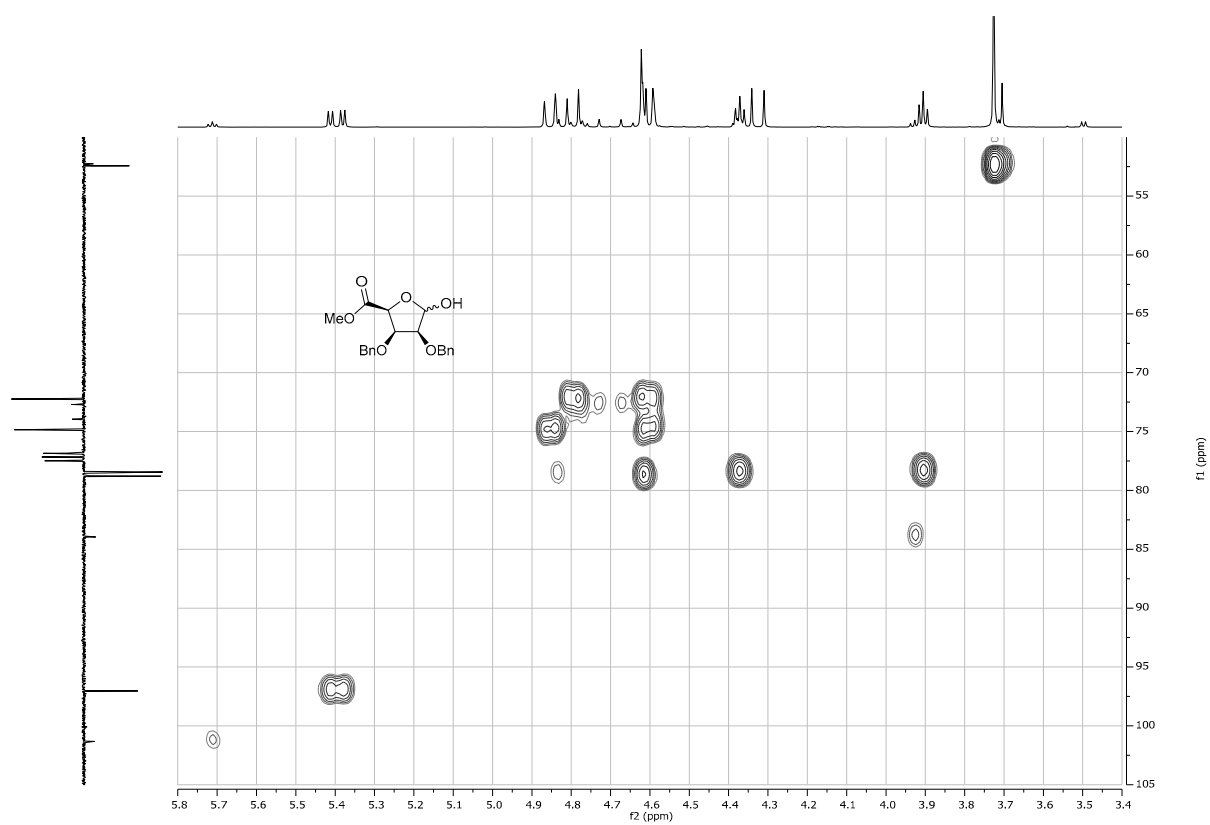

$^1\text{H}$ - $^1\text{H}$  NOESY of compound **23**

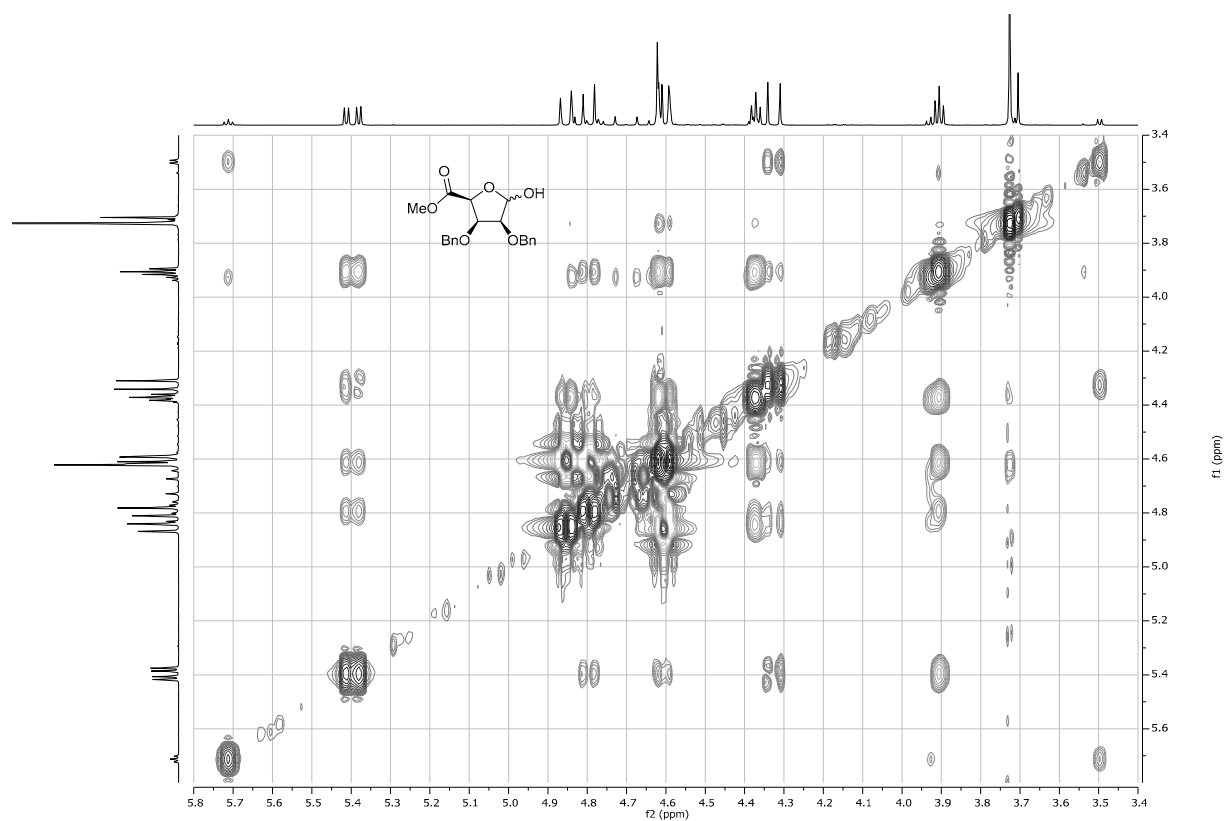

Methyl (2,3-di-O-benzyl- $\alpha/\beta$ -D-xylofuranosyl uronate) (**24**)

$^1\text{H}$  NMR, 400 MHz,  $\text{CDCl}_3$  of compound **24**

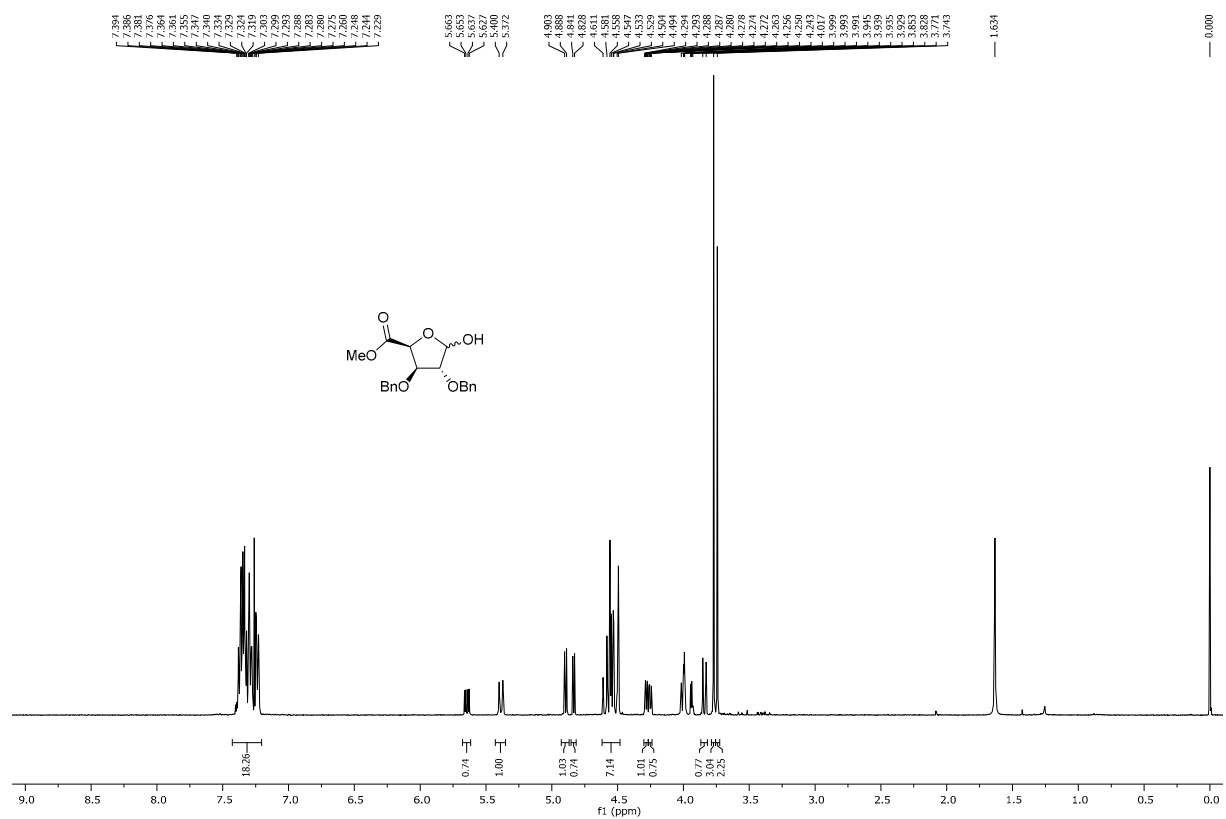

$^{13}\text{C}$ -APT NMR, 101 MHz,  $\text{CDCl}_3$  of compound **24**

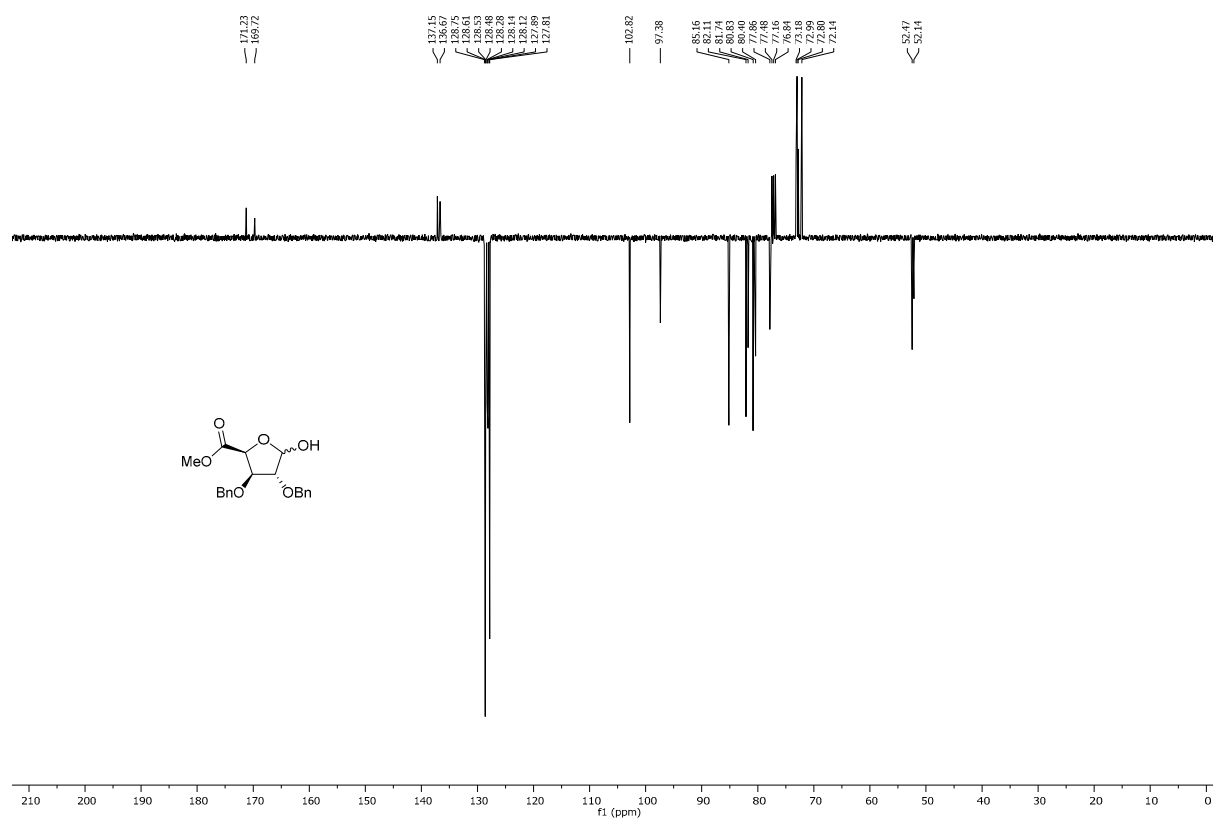

$^1\text{H}$ - $^1\text{H}$  COSY of compound **24**

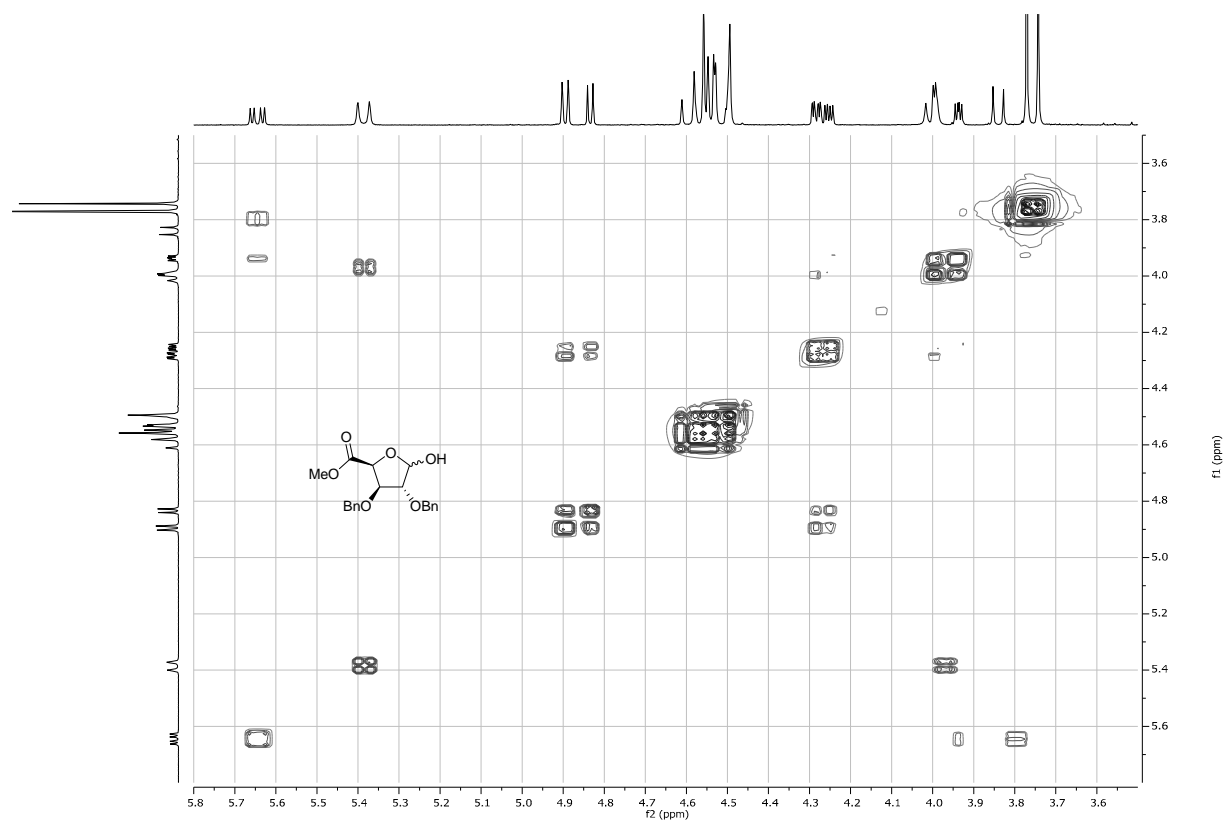

$^1\text{H}$ - $^{13}\text{C}$  HSQC of compound **24**

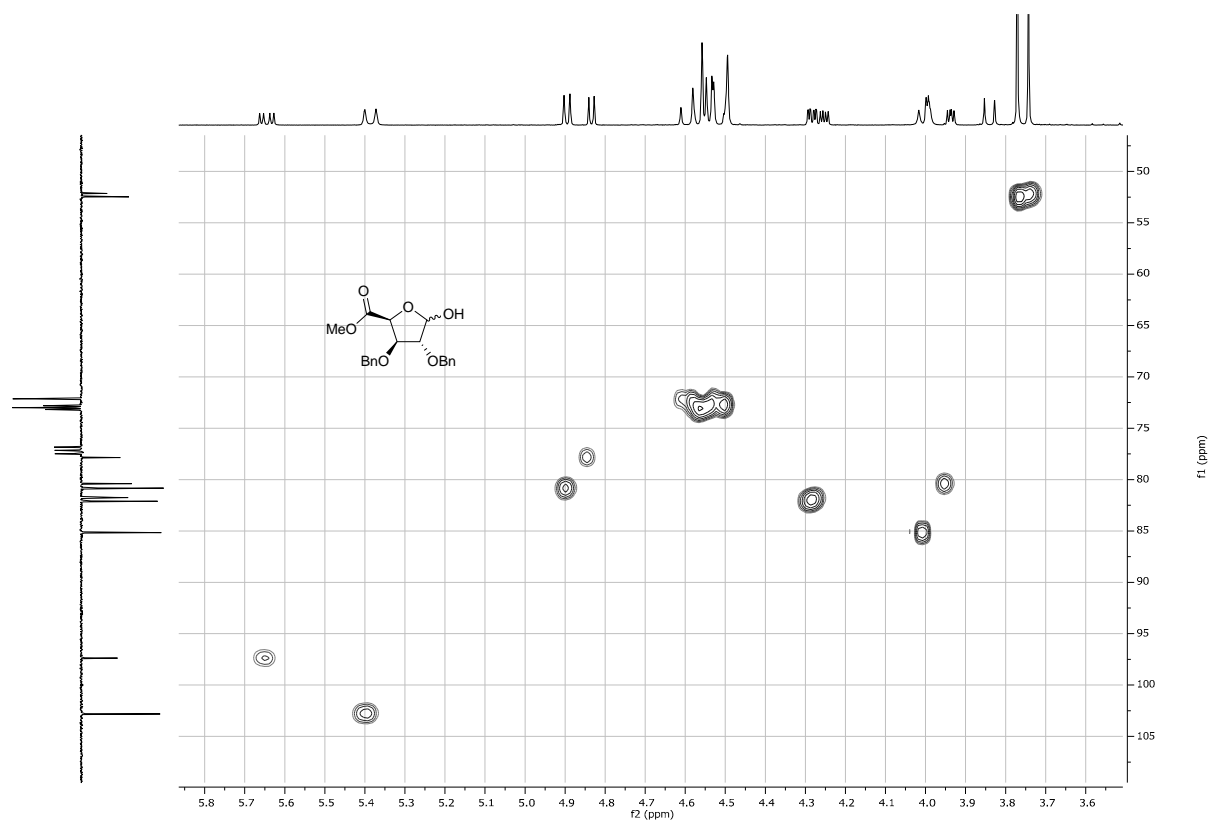

$^1\text{H}$ - $^1\text{H}$  NOESY of compound **24**

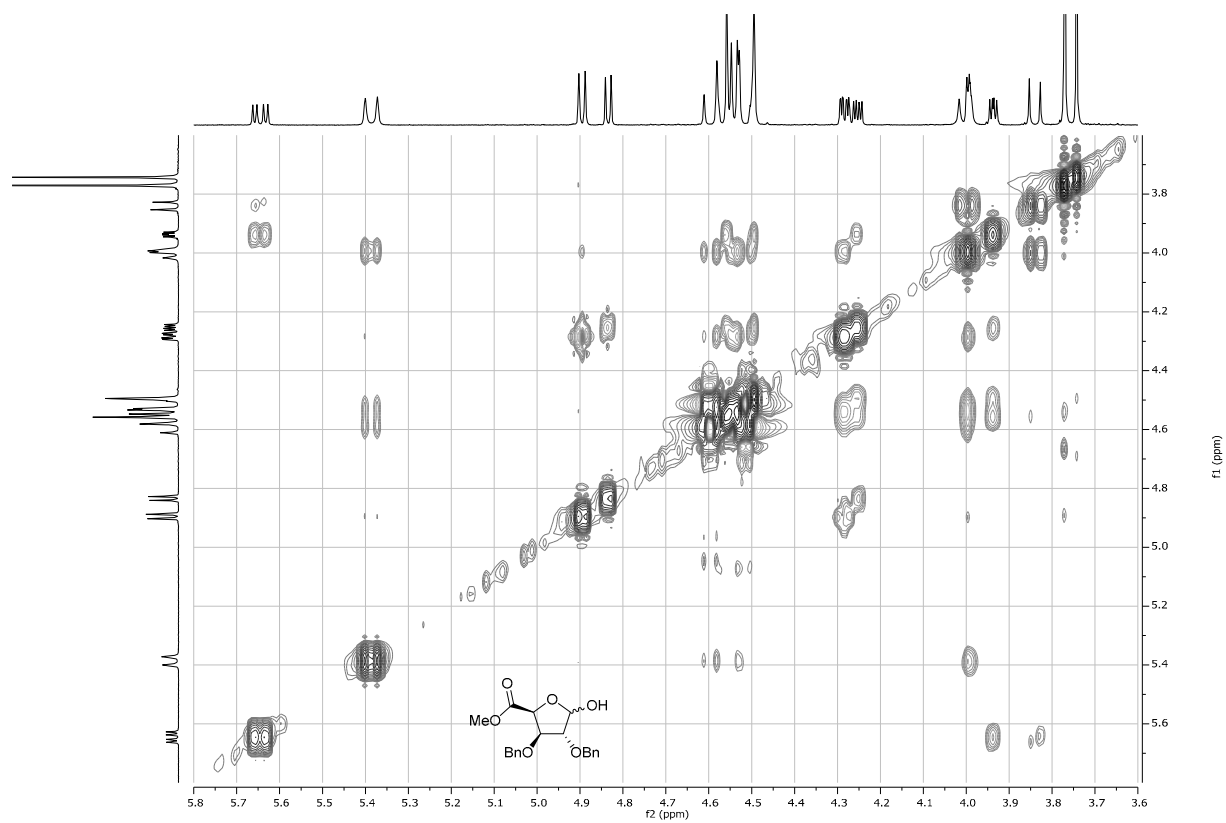

Methyl 3,5-di-O-benzyl-2-O-trifluoromethanesulfonate- $\alpha$ -D-ribofuranoside (29).

$^1\text{H}$  NMR, 400 MHz,  $\text{CDCl}_3$  of compound 29

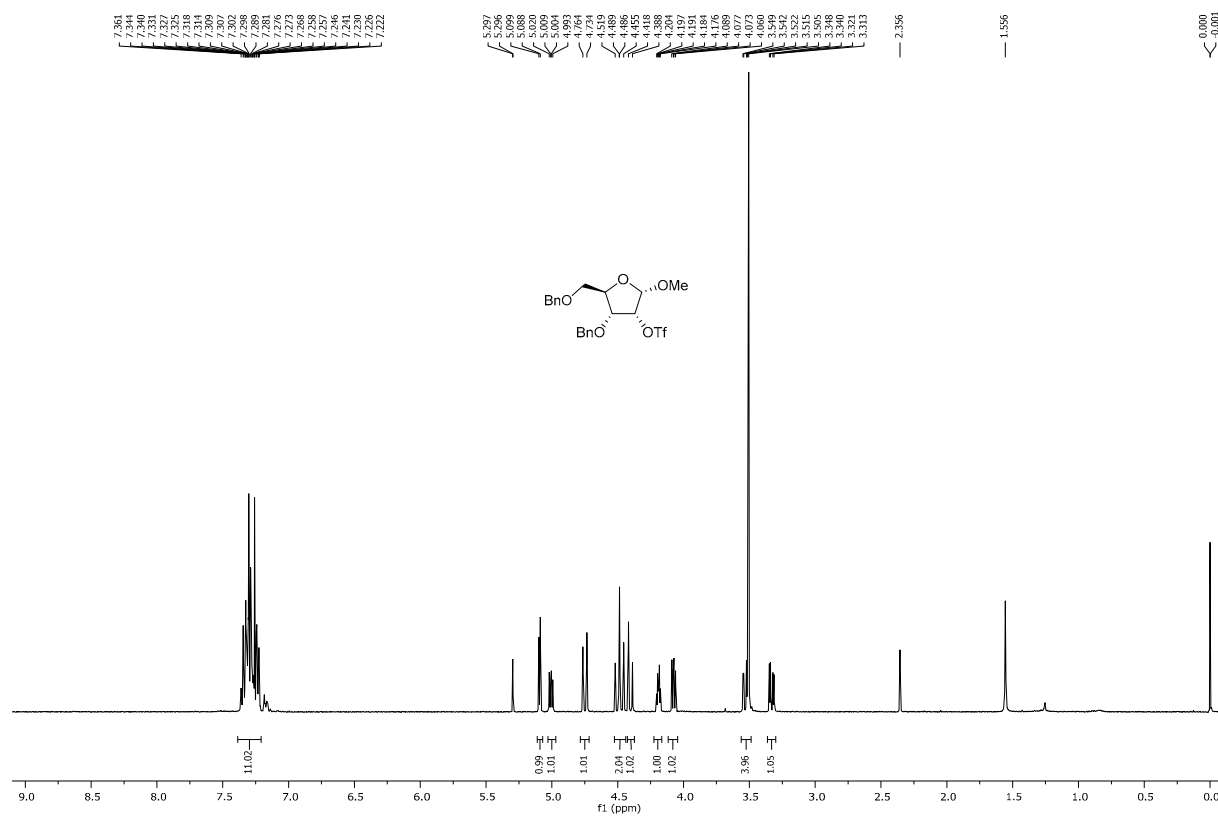

$^{13}\text{C}$ -APT NMR, 101 MHz,  $\text{CDCl}_3$  of compound 29

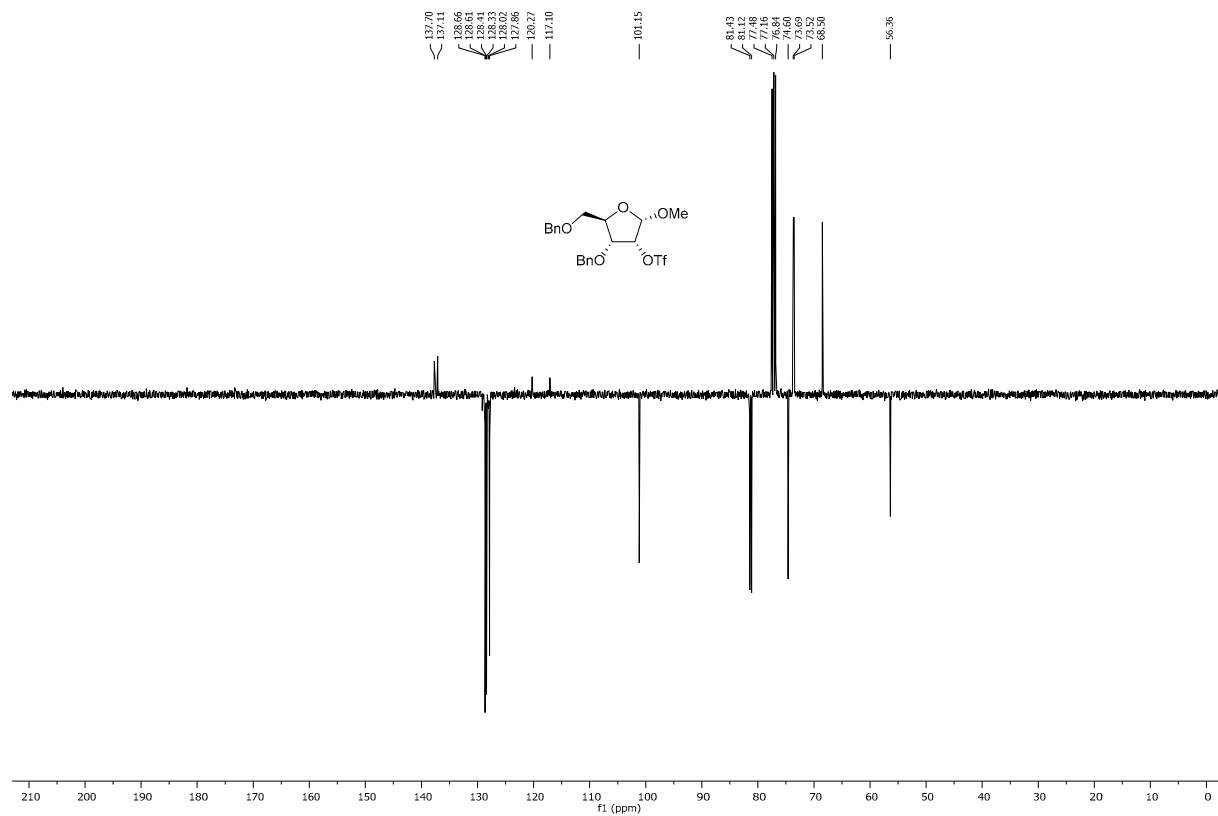

$^1\text{H}$ - $^1\text{H}$  COSY of compound **29**

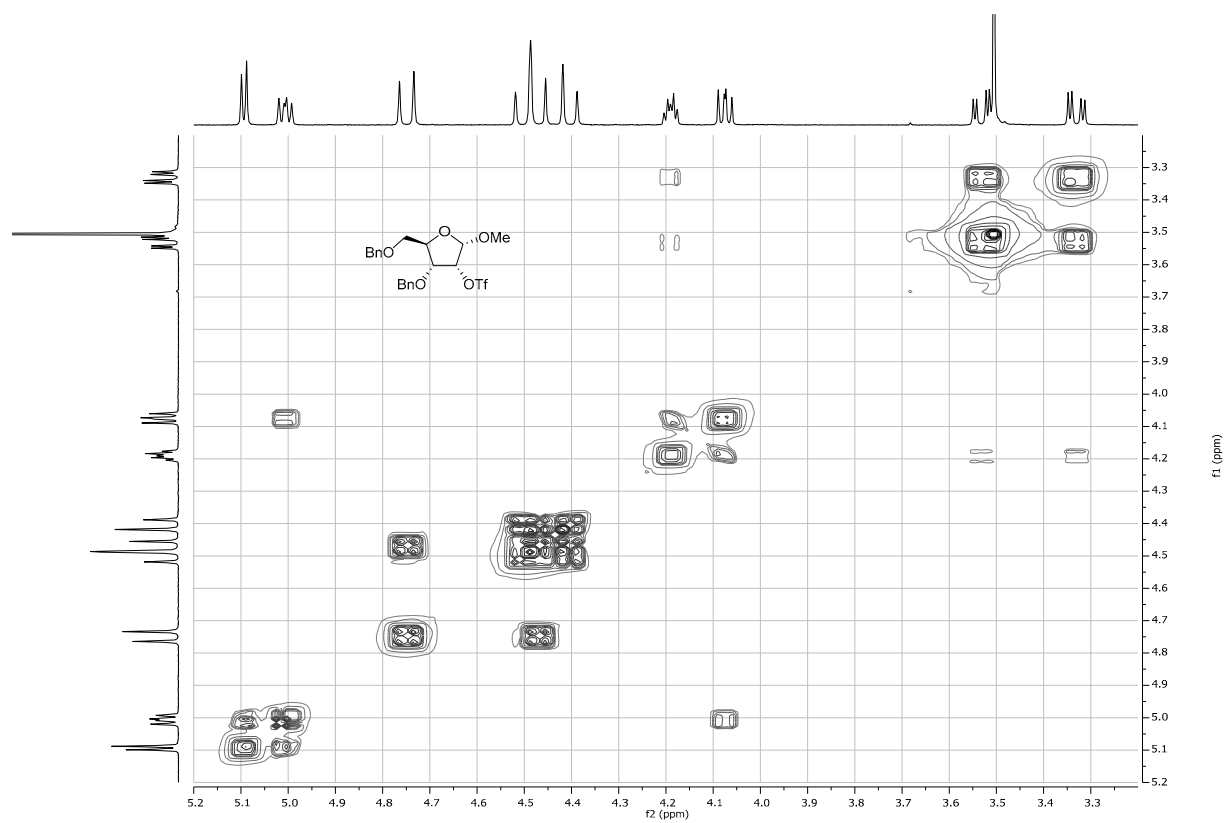

$^1\text{H}$ - $^{13}\text{C}$  HSQC of compound **29**

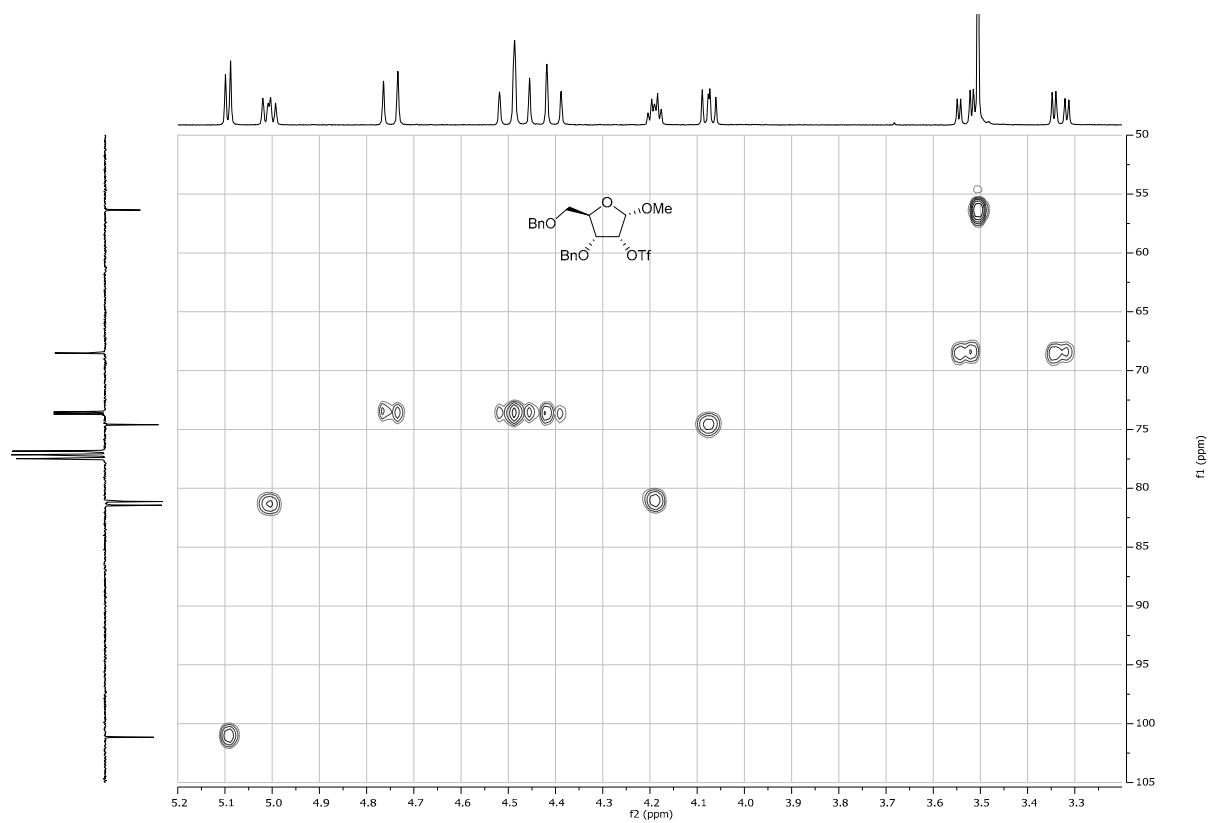



Methyl 3,5-di-O-benzyl-2-O-trifluoromethanesulfonate- $\alpha/\beta$ -D-arabinofuranoside (30).

$^1\text{H}$  NMR, 400 MHz,  $\text{CDCl}_3$  of compound 30

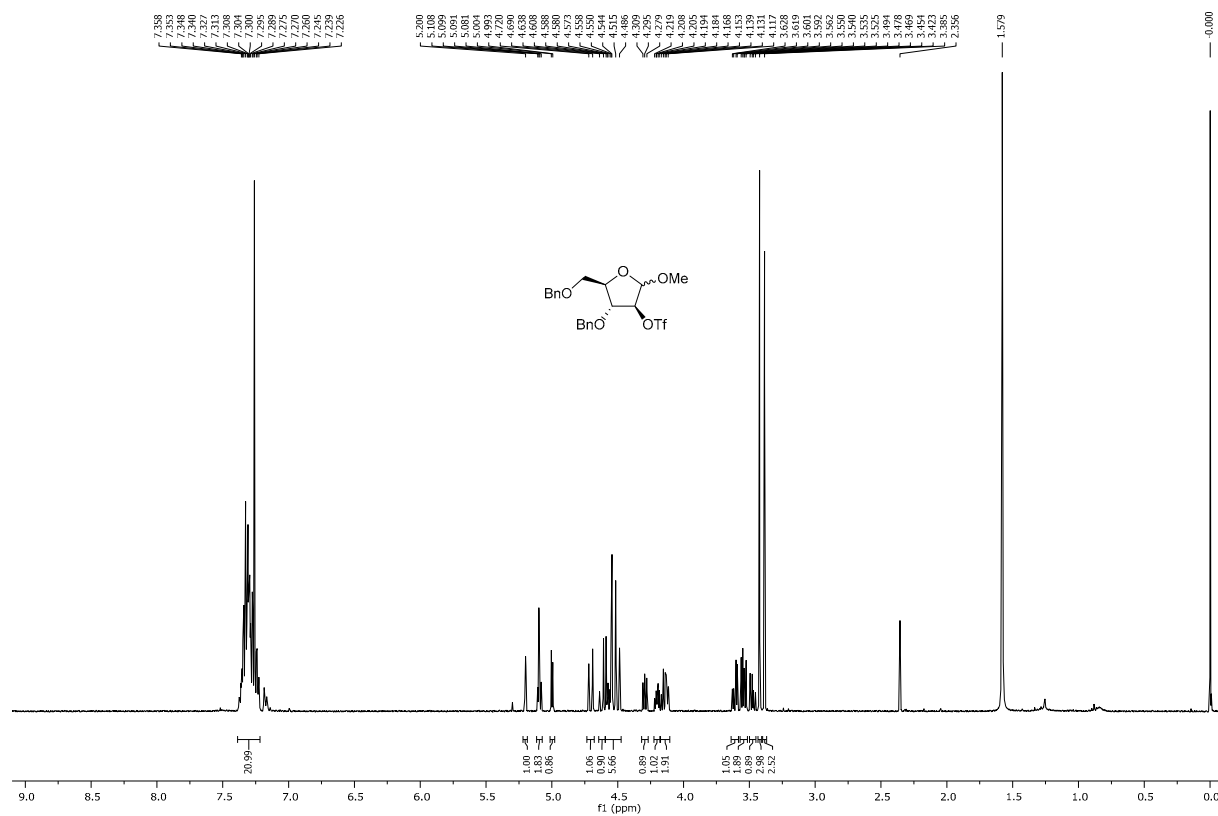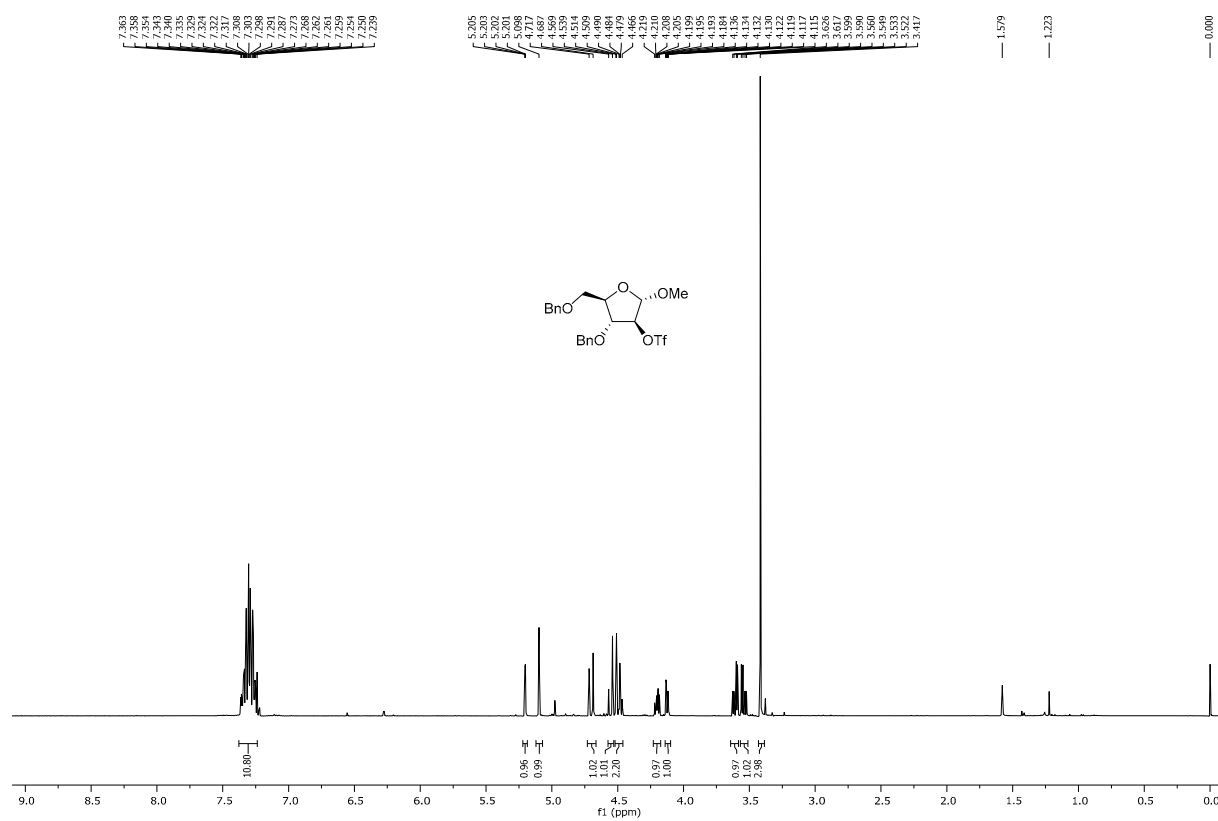

$^{13}\text{C}$ -APT NMR, 101 MHz,  $\text{CDCl}_3$  of compound **30**

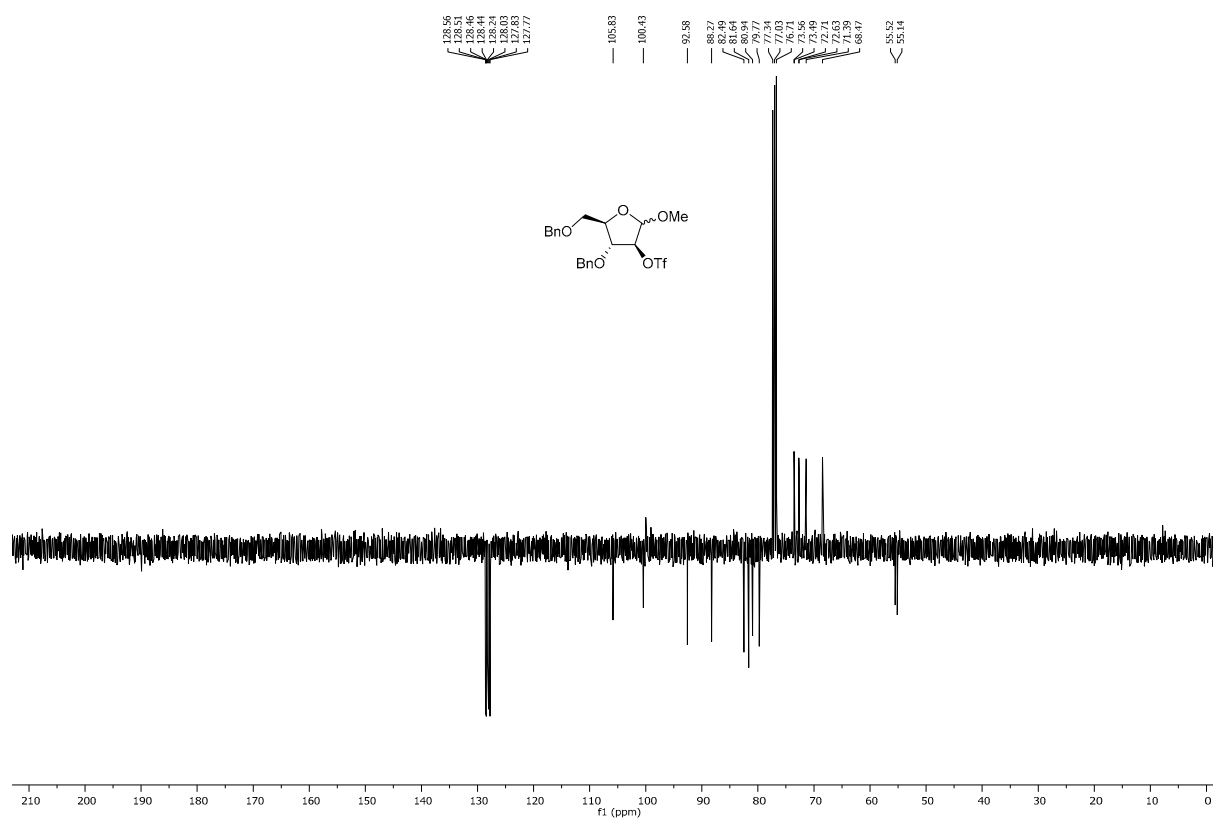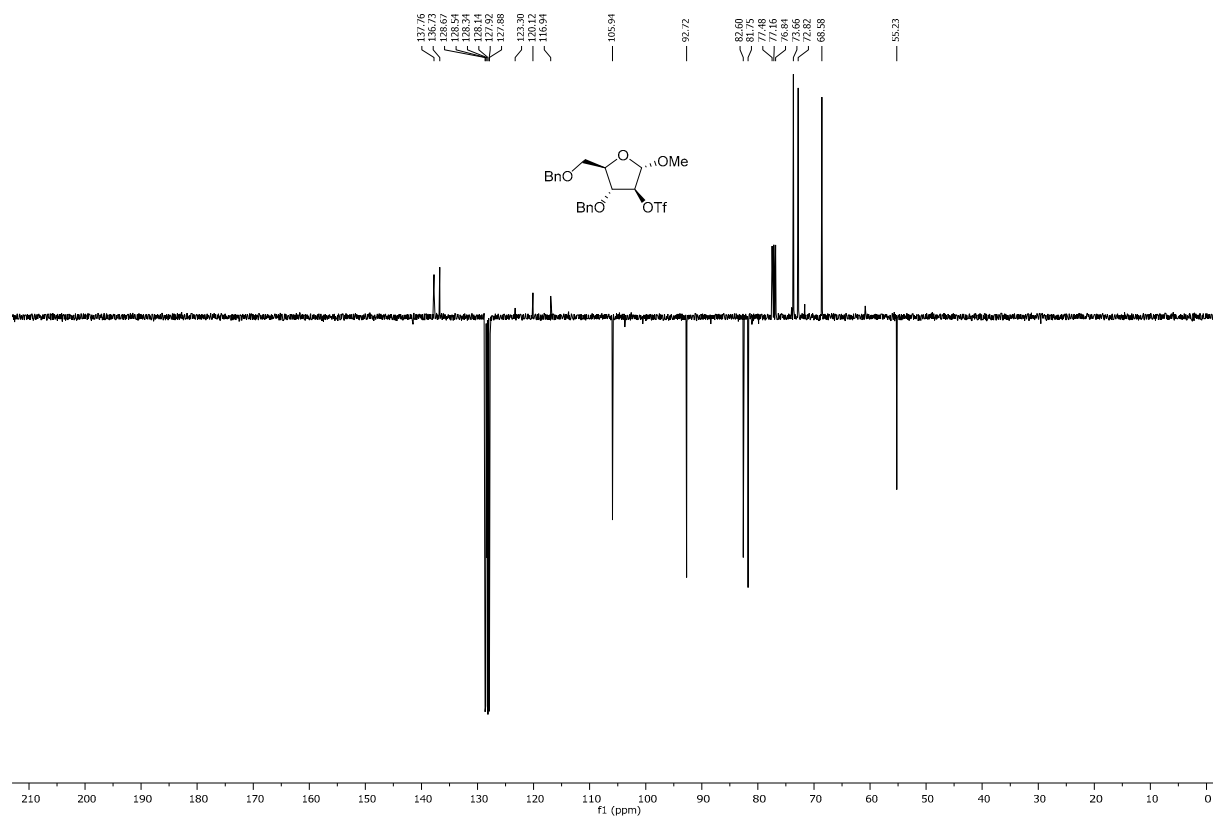

$^1\text{H}$ - $^1\text{H}$  COSY of compound **30**

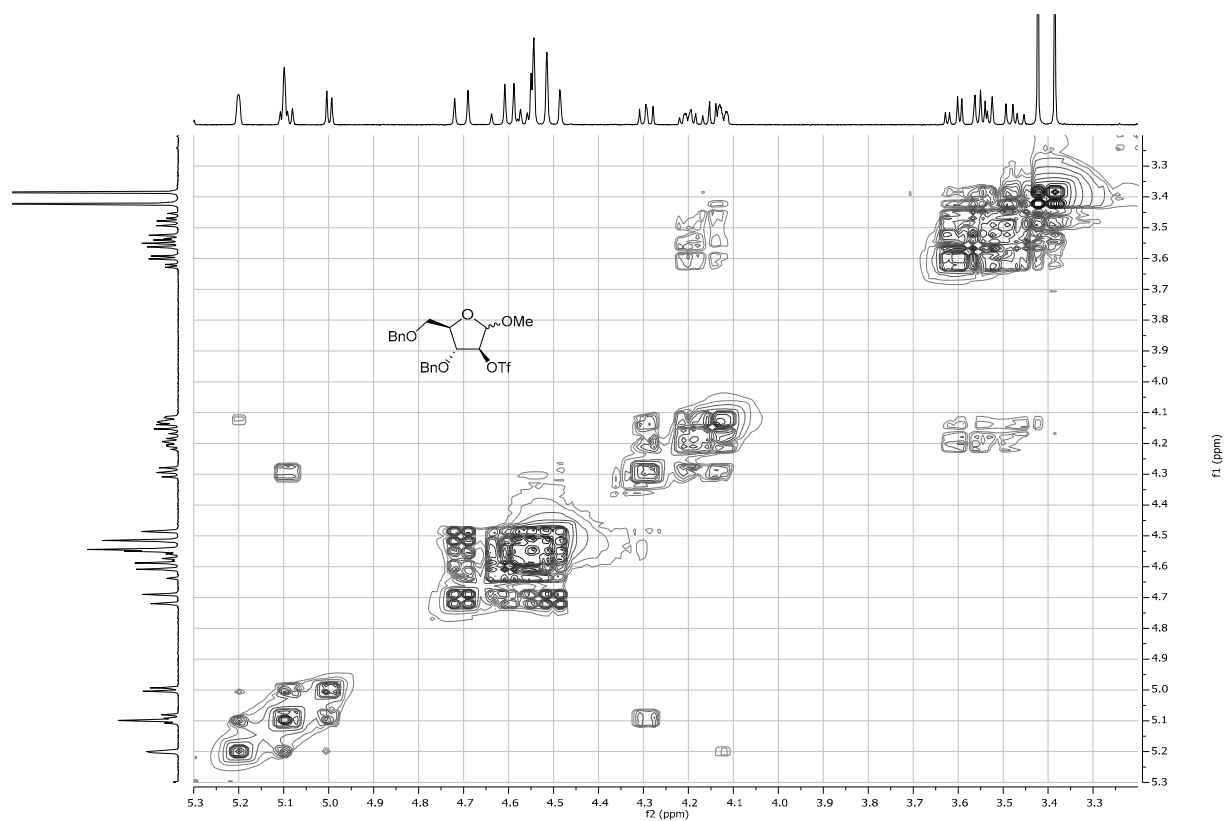

$^1\text{H}$ - $^{13}\text{C}$  HSQC of compound **30**

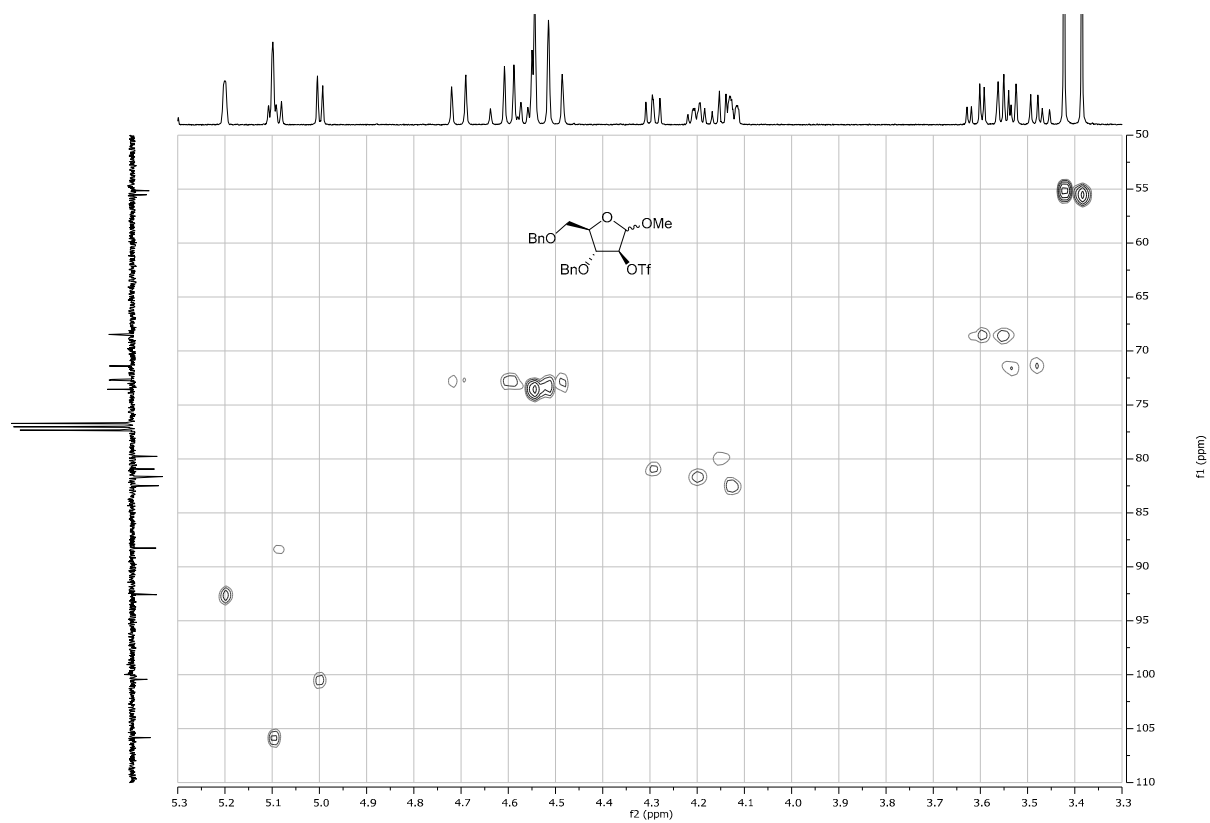

Methyl 3,5-di-O-benzyl-2-O-trifluoromethanesulfonate- $\alpha$ -D-lyxofuranoside (**31**).

$^1\text{H}$  NMR, 400 MHz,  $\text{CDCl}_3$  of compound **31**

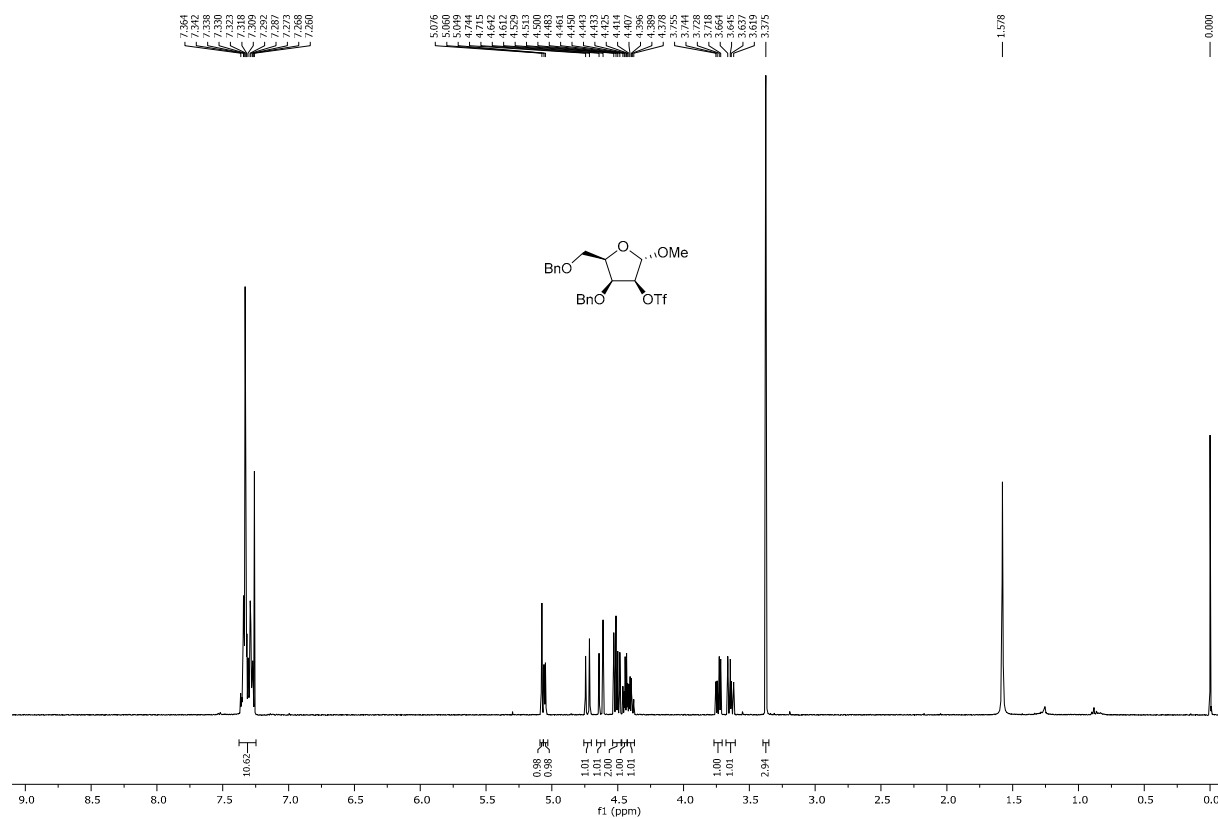

$^{13}\text{C}$ -APT NMR, 101 MHz,  $\text{CDCl}_3$  of compound **31**

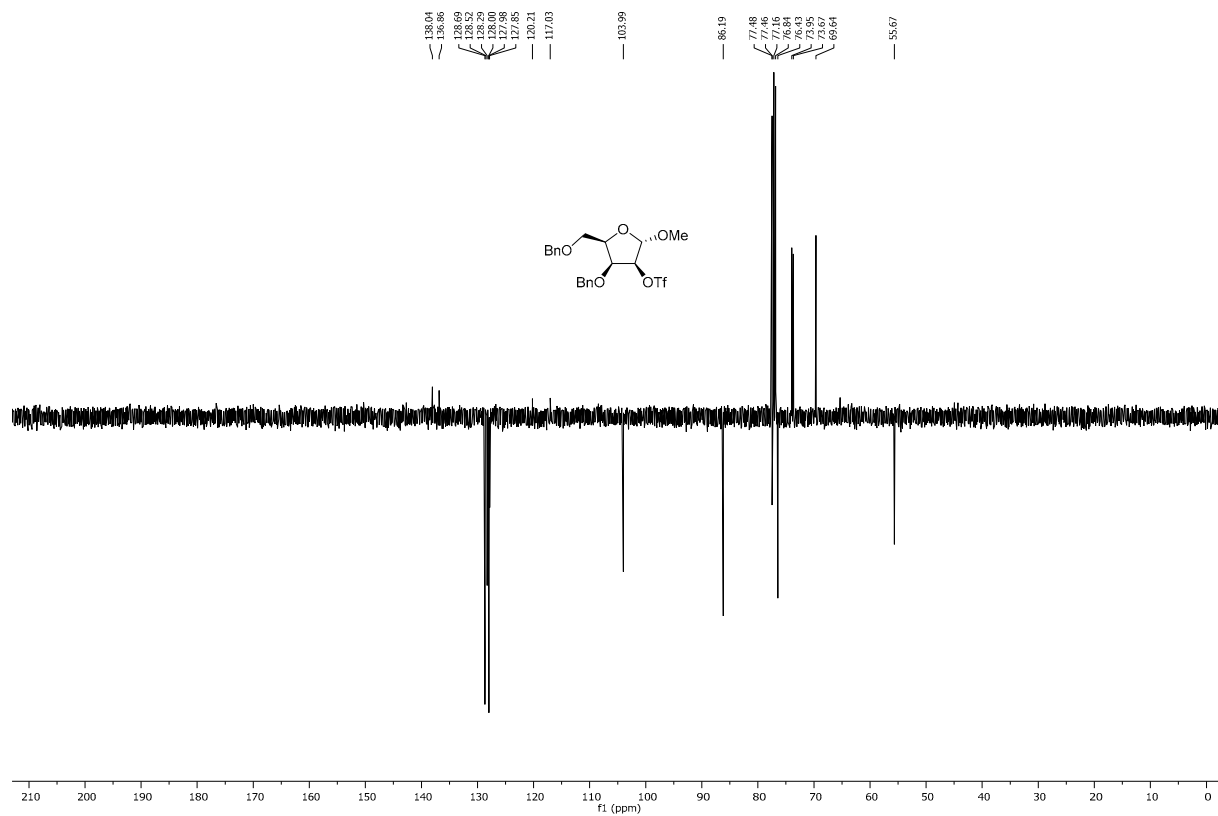

$^1\text{H}$ - $^1\text{H}$  COSY of compound **31**

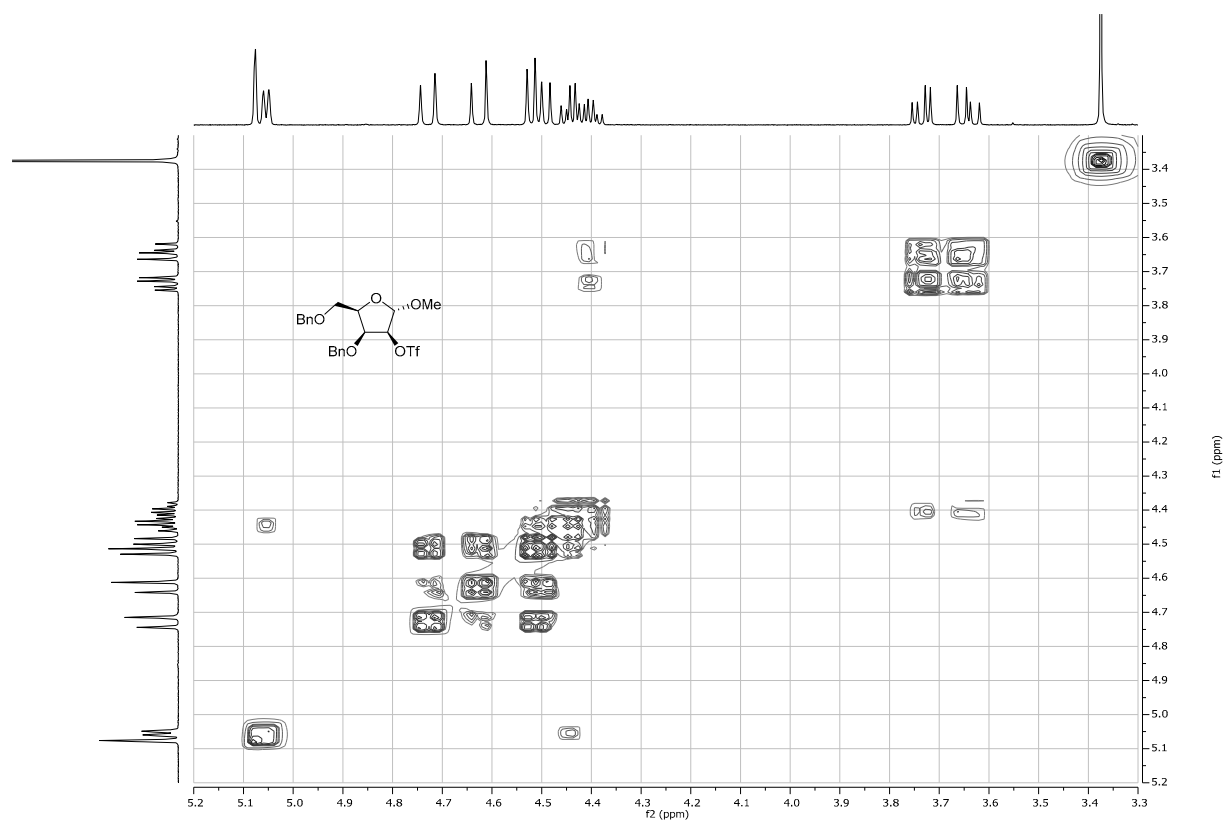

$^1\text{H}$ - $^{13}\text{C}$  HSQC of compound **31**

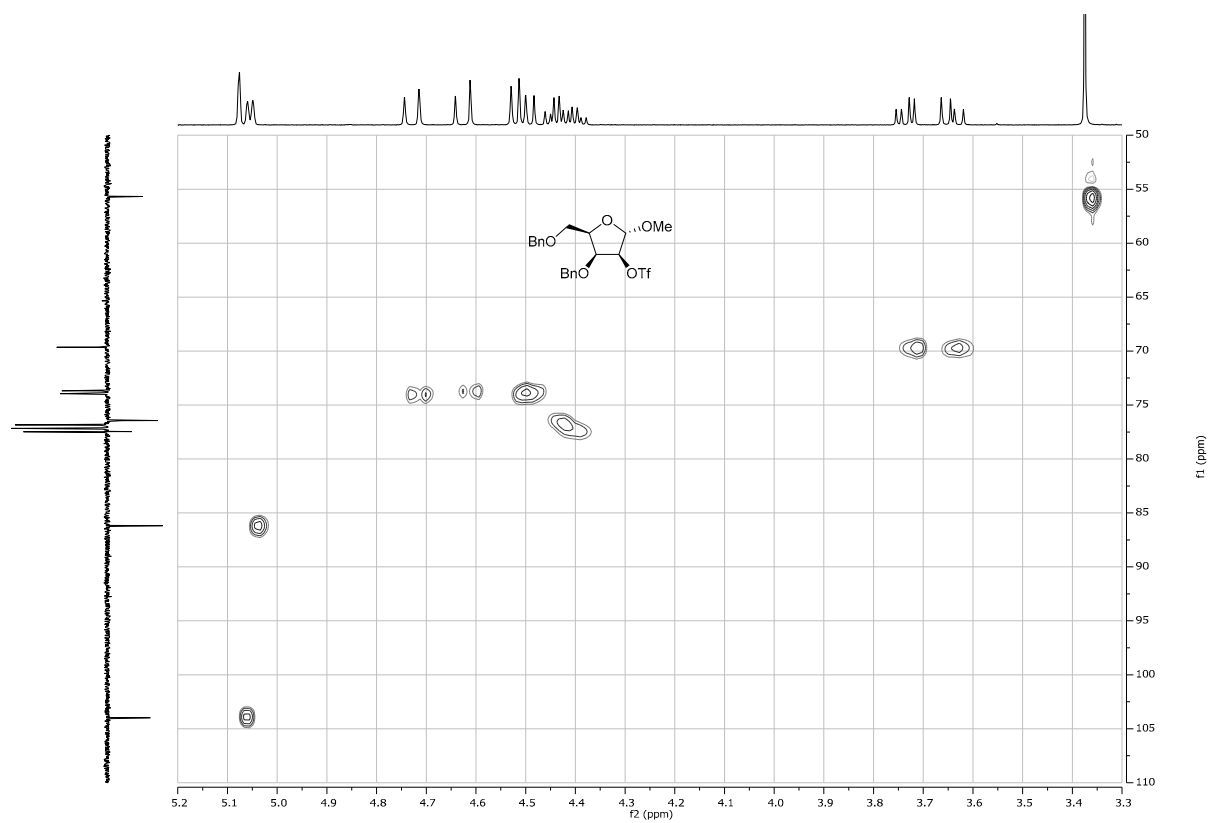

Methyl 3,5-di-O-benzyl-2-O-trifluoromethanesulfonate- $\alpha$ -D-xylofuranoside (**32 $\alpha$** ).

$^1\text{H}$  NMR, 400 MHz,  $\text{CDCl}_3$  of compound **32 $\alpha$**

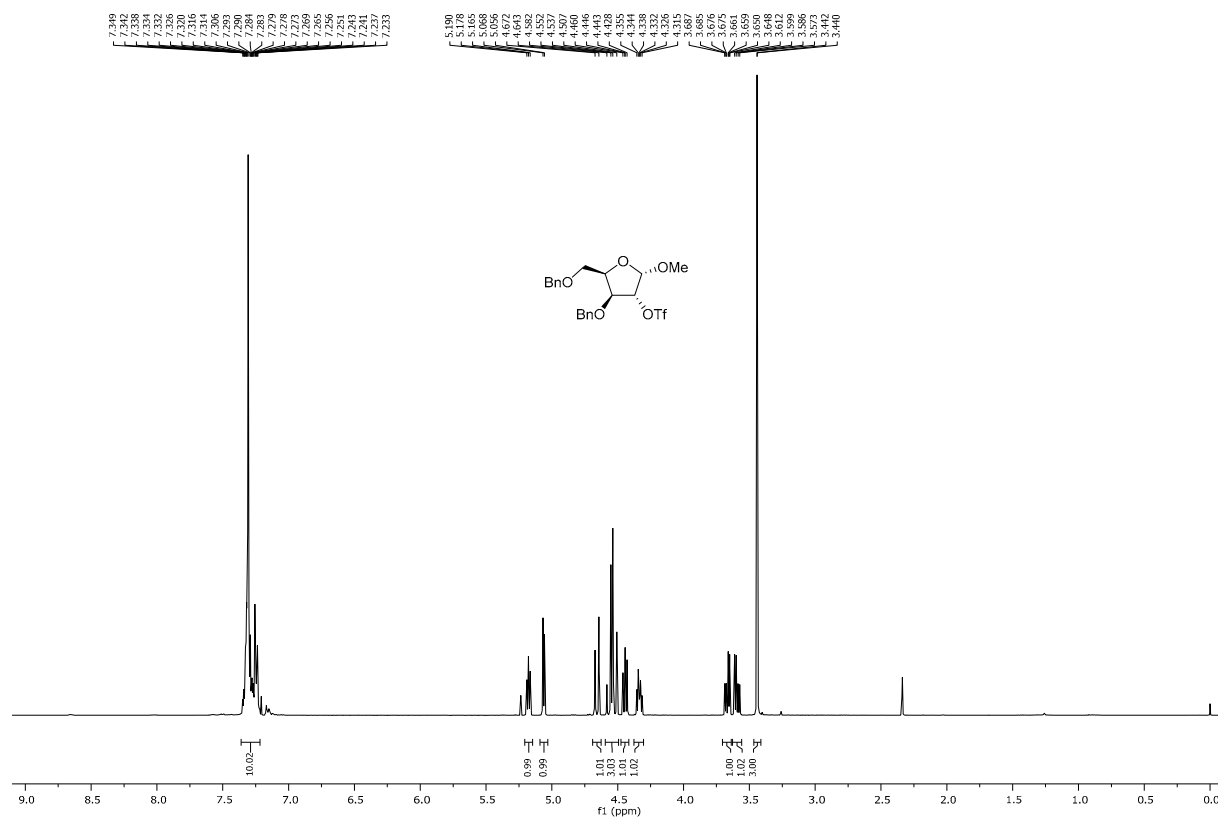

$^{13}\text{C}$ -APT NMR, 101 MHz,  $\text{CDCl}_3$  of compound **32 $\alpha$**

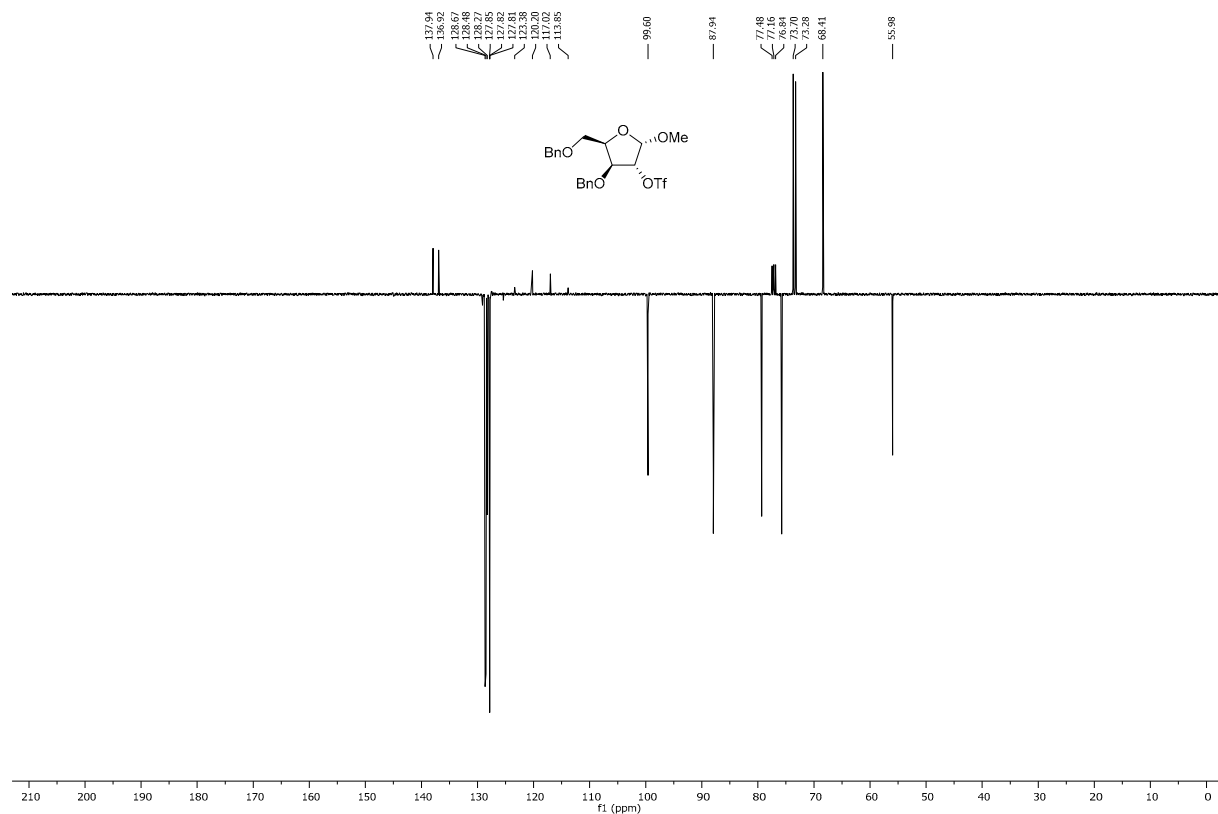

$^1\text{H}$ - $^1\text{H}$  COSY of compound **32 $\alpha$**

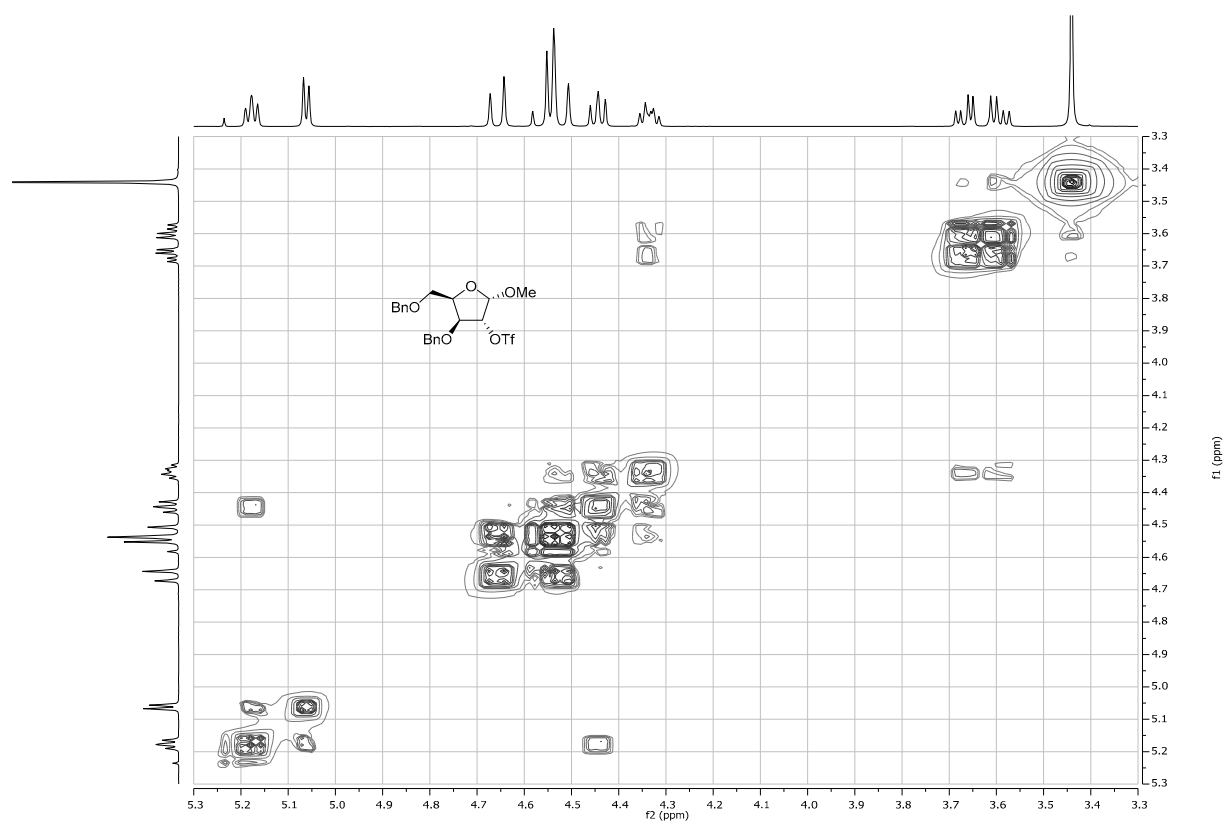

$^1\text{H}$ - $^{13}\text{C}$  HSQC of compound **32 $\alpha$**

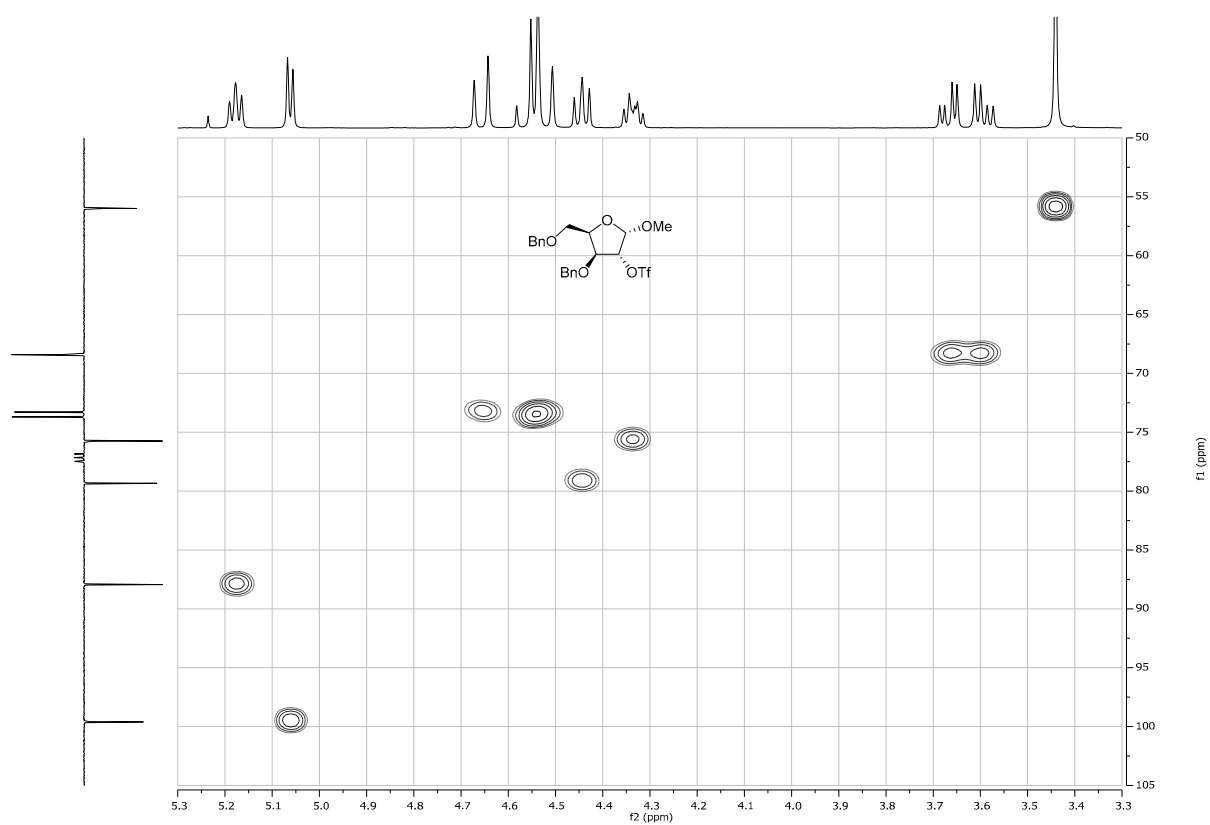





$^1\text{H}$ - $^1\text{H}$  COSY of compound **32 $\beta$**

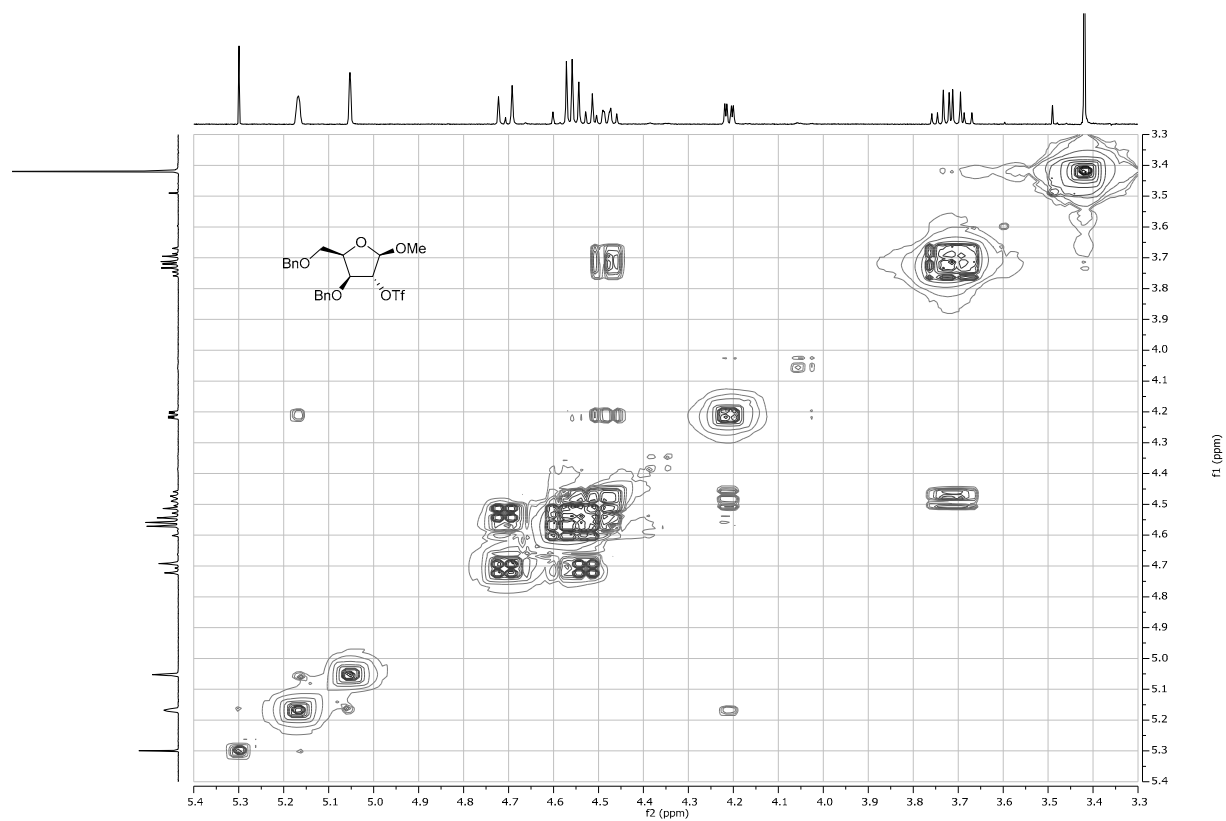

$^1\text{H}$ - $^{13}\text{C}$  HSQC of compound **32 $\beta$**

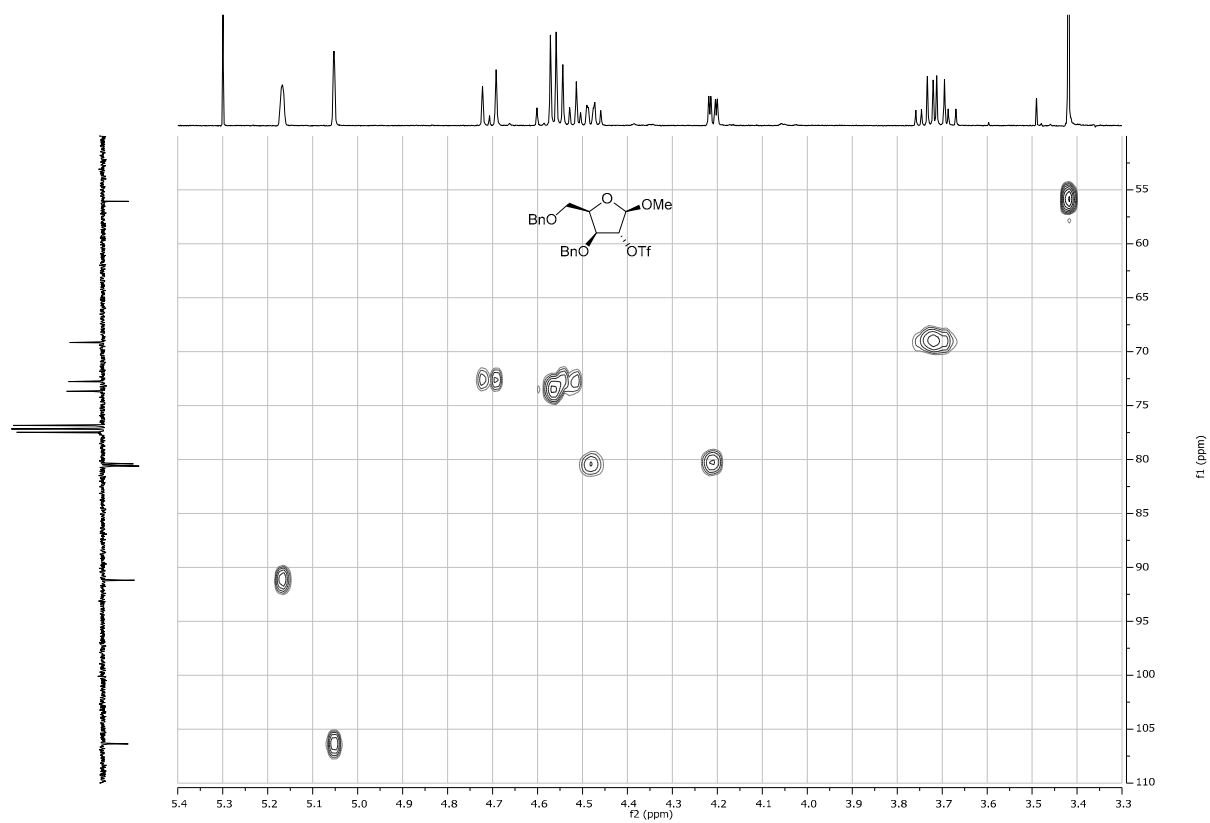

Methyl 2-azido-3,5-di-O-benzyl-2-deoxy- $\alpha$ -D-ribofuranoside (**33 $\alpha$** )

$^1\text{H}$  NMR, 400 MHz,  $\text{CDCl}_3$  of compounds **33 $\alpha$**  and **51**

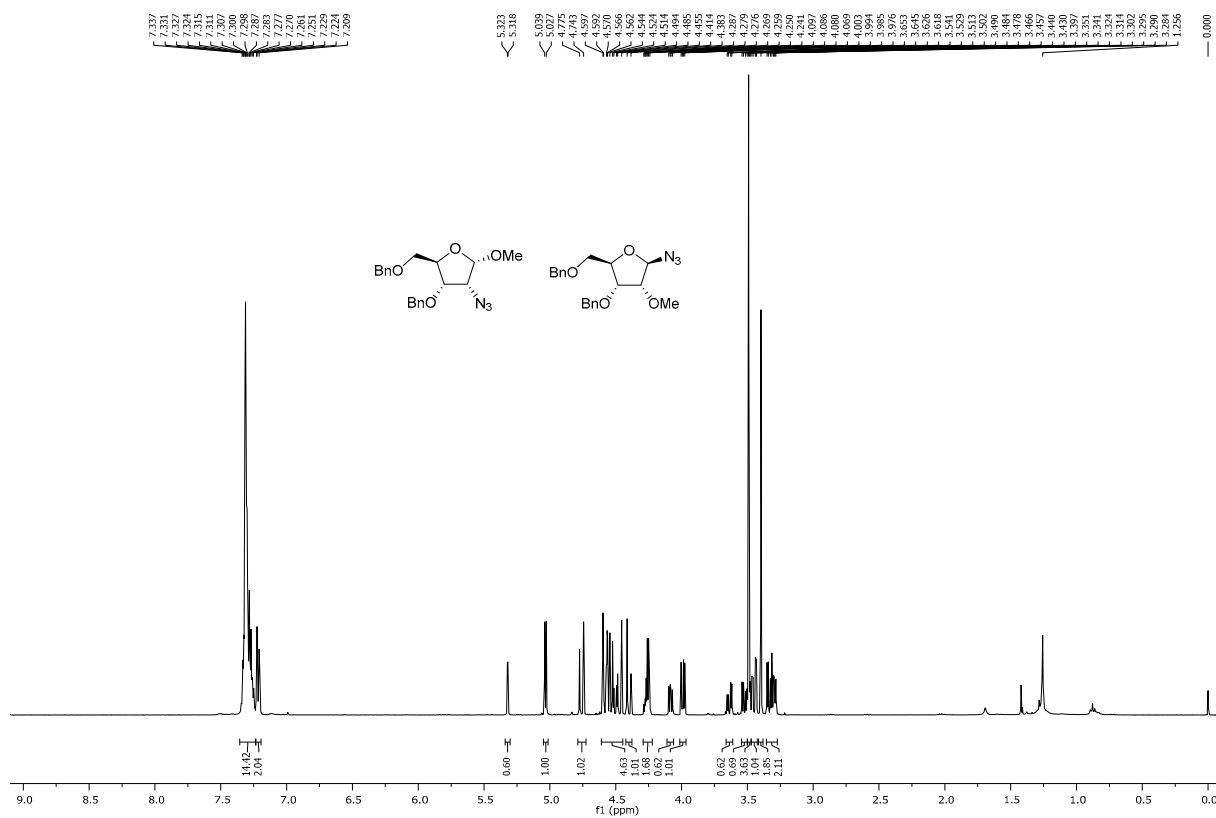

$^{13}\text{C}$ -APT NMR, 101 MHz,  $\text{CDCl}_3$  of compounds **33 $\alpha$**  and **51**

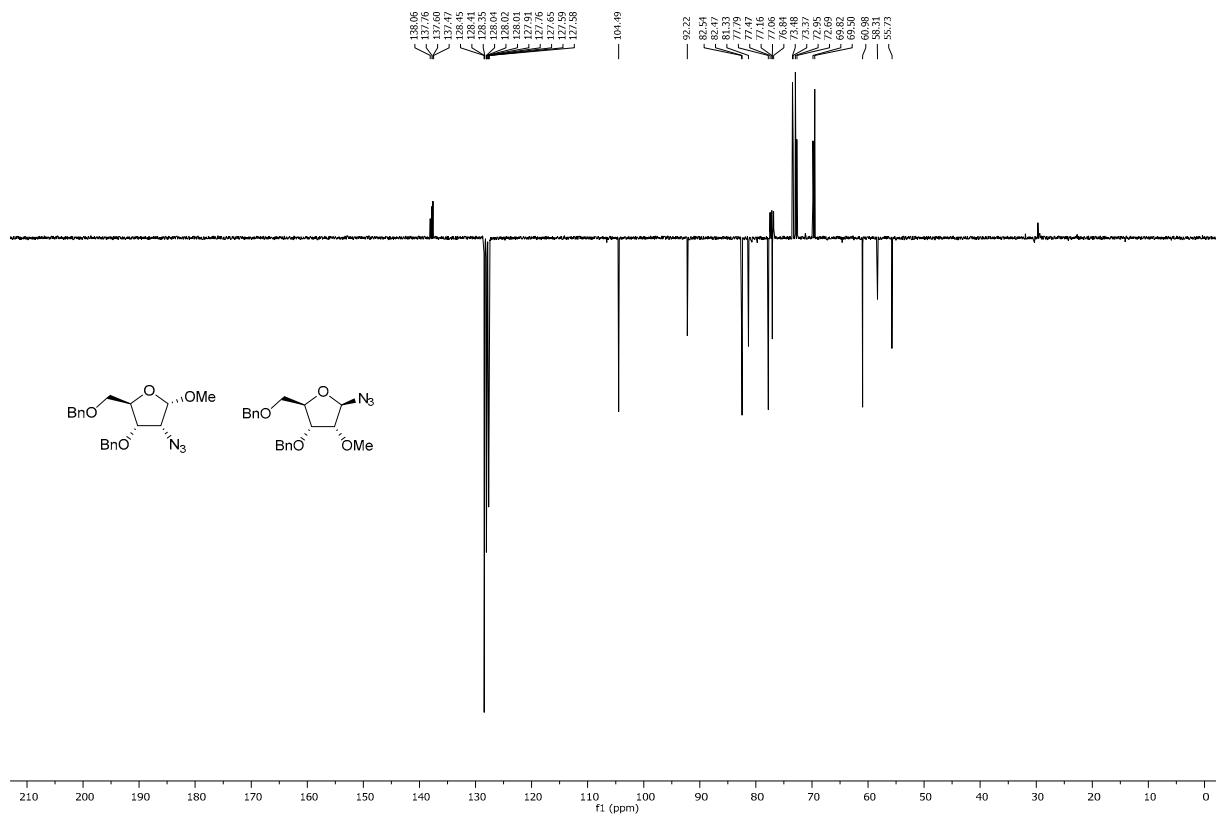

$^1\text{H}$ - $^1\text{H}$  COSY of compound compounds **33 $\alpha$**  and **51**

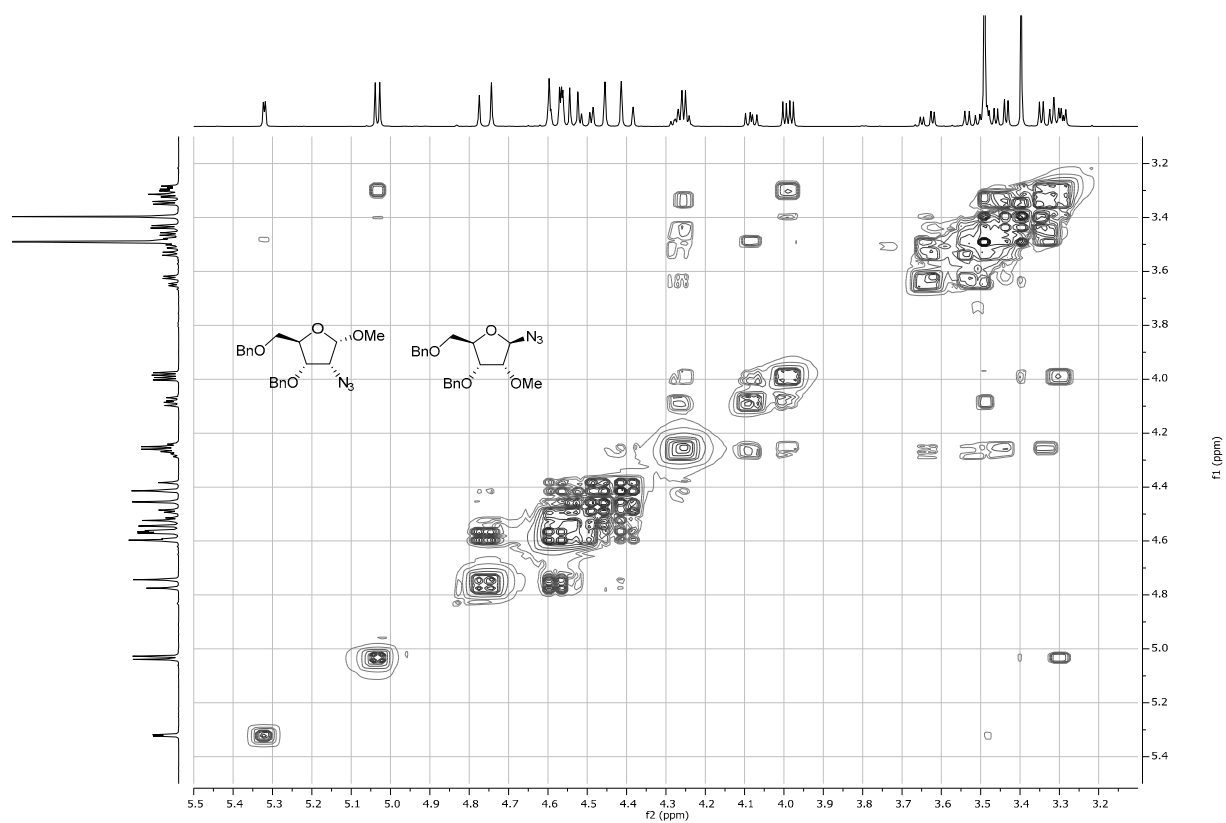

$^1\text{H}$ - $^{13}\text{C}$  HSQC of compound compounds **33 $\alpha$**  and **51**

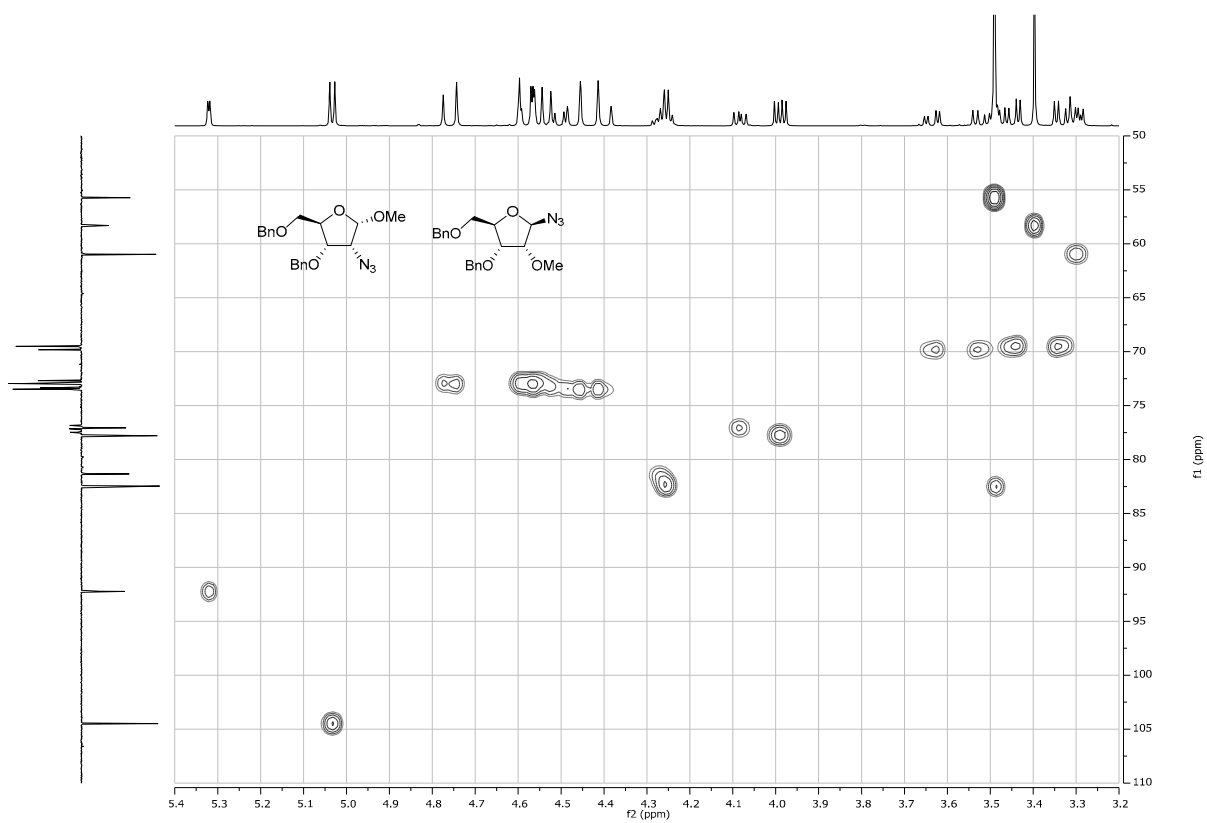

$^1\text{H}$ - $^{13}\text{C}$  HMBC of compound compounds **33 $\alpha$**  and **51**

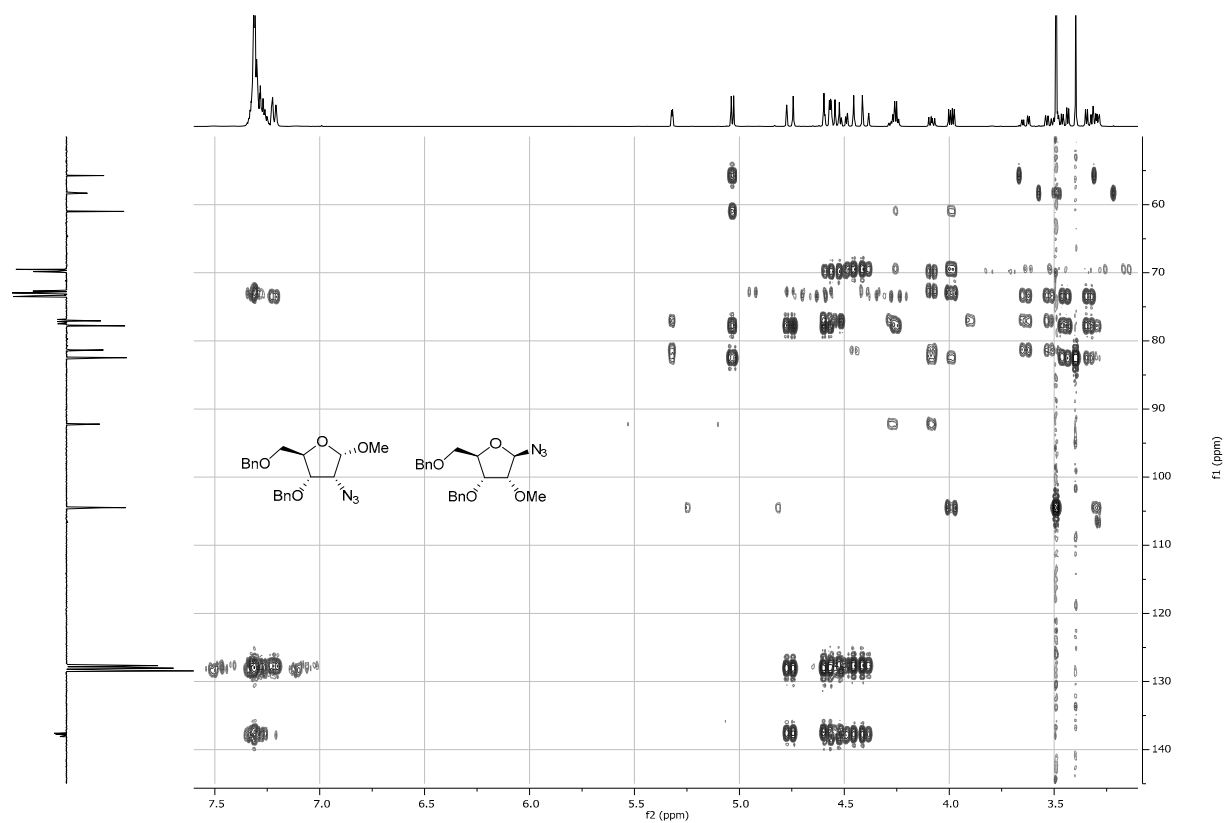

$^1\text{H}$ - $^1\text{H}$  NOESY of compound compounds **33 $\alpha$**  and **51**

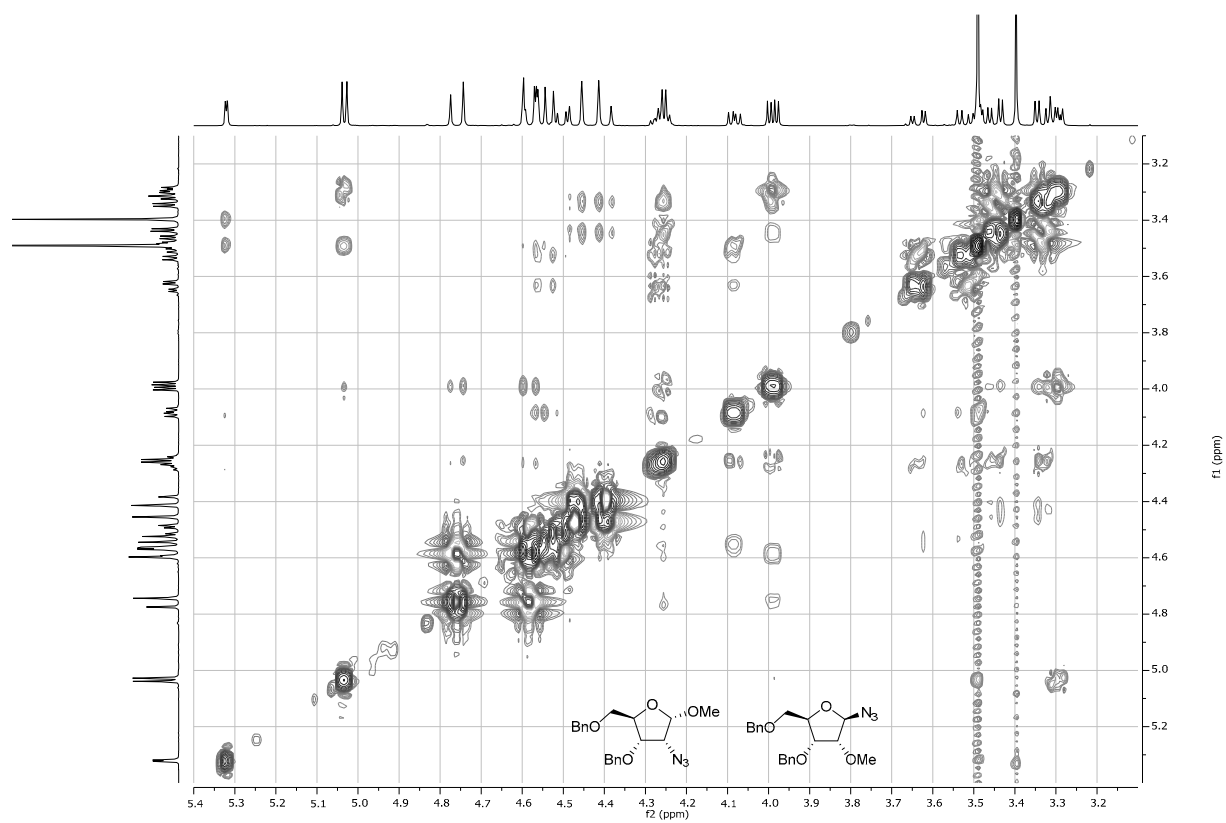

# Methyl 2-azido-3,5-di-O-benzyl-2-deoxy-β-D-ribofuranoside (**33β**)

<sup>1</sup>H NMR, 400 MHz, CDCl<sub>3</sub> of compound **33β**

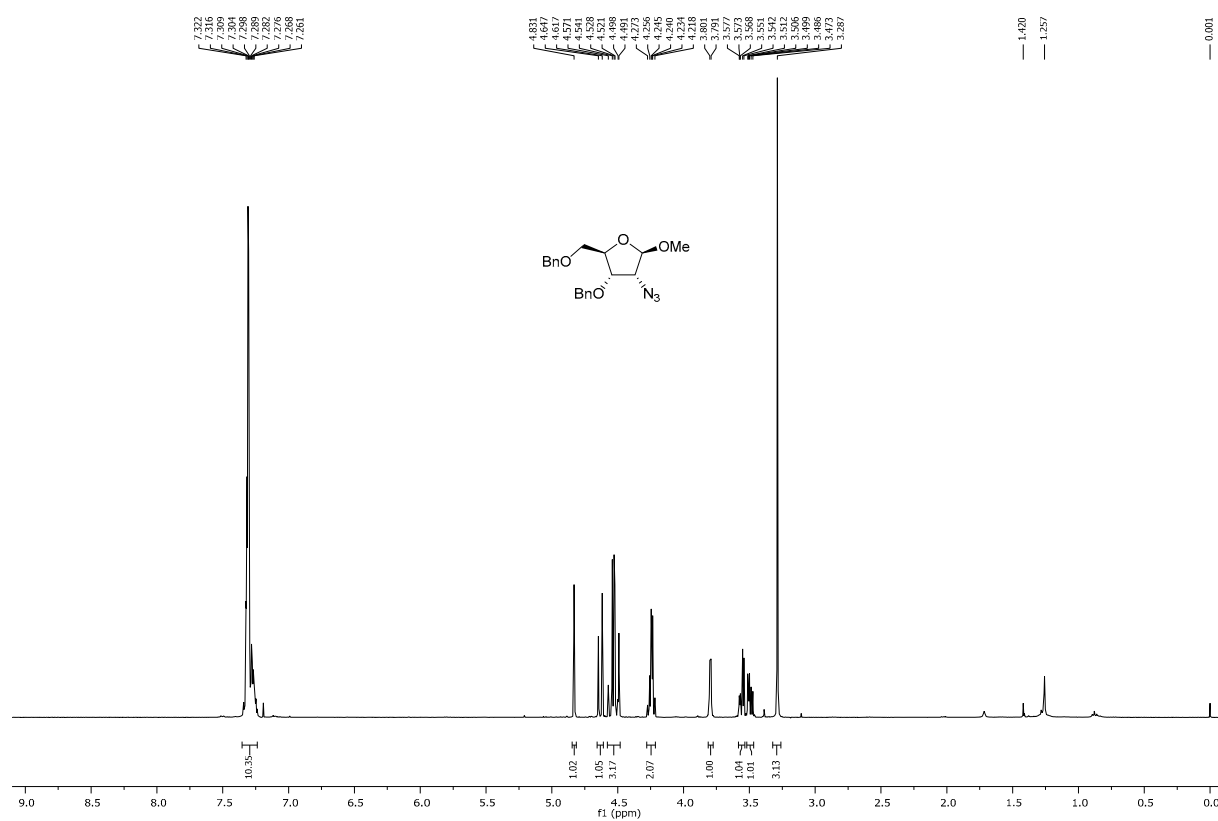

<sup>13</sup>C-APT NMR, 101 MHz, CDCl<sub>3</sub> of compound **33β**

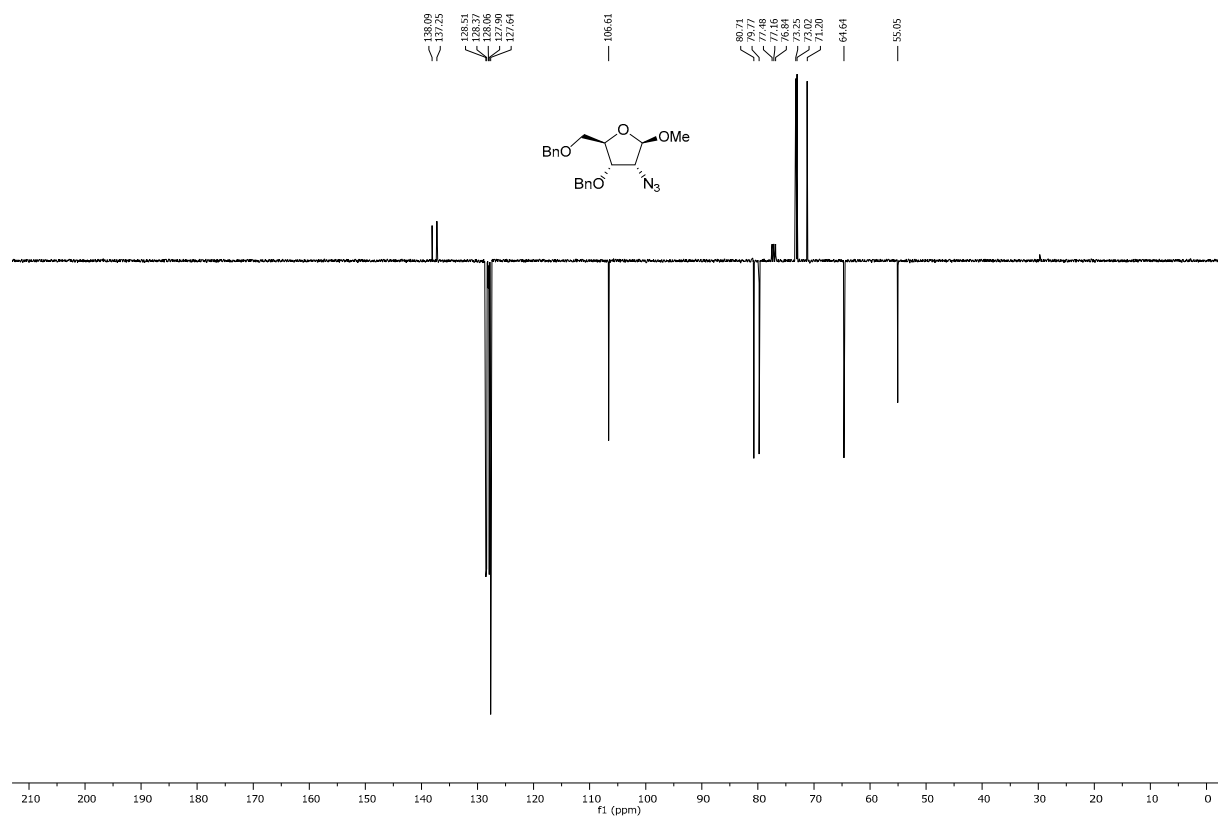

$^1\text{H}$ - $^1\text{H}$  COSY of compound **33 $\beta$**

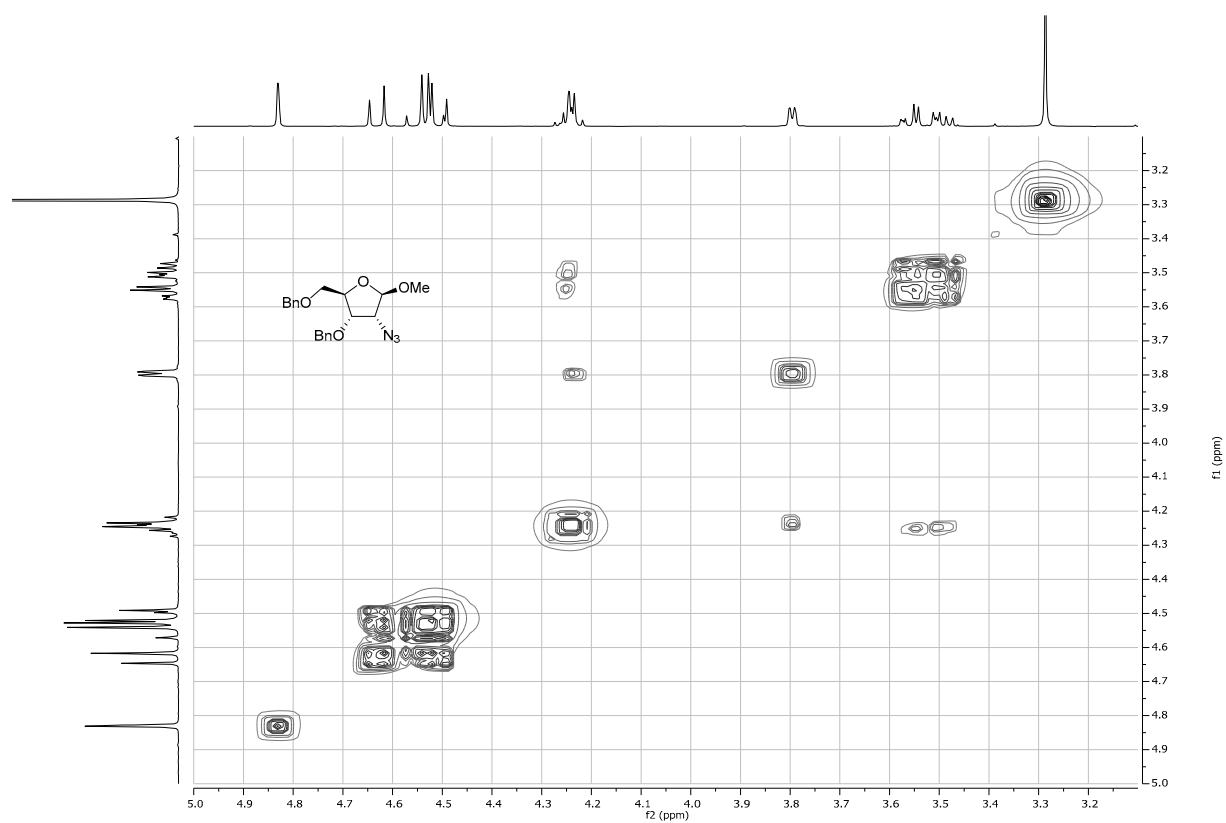

$^1\text{H}$ - $^{13}\text{C}$  HSQC of compound **33 $\beta$**

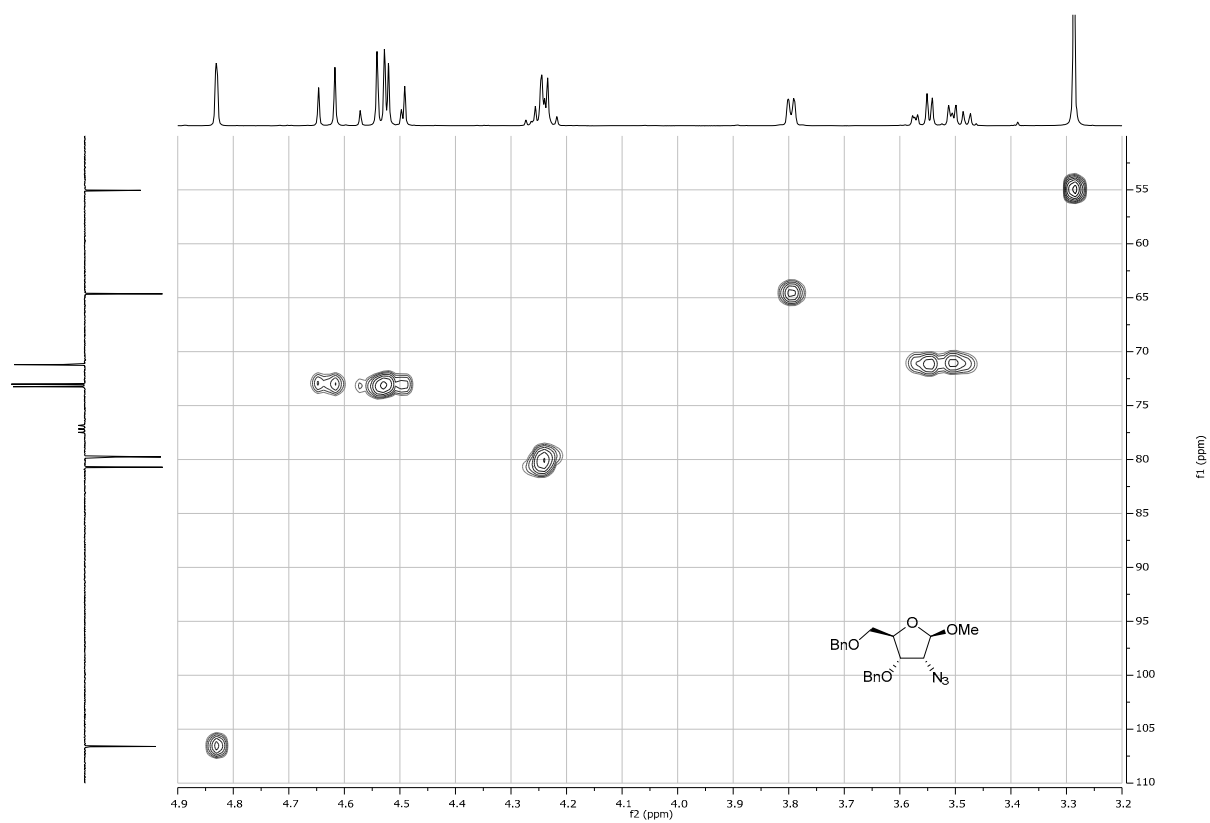

$^1\text{H}$ - $^{13}\text{C}$  HMBC of compound **33 $\beta$**

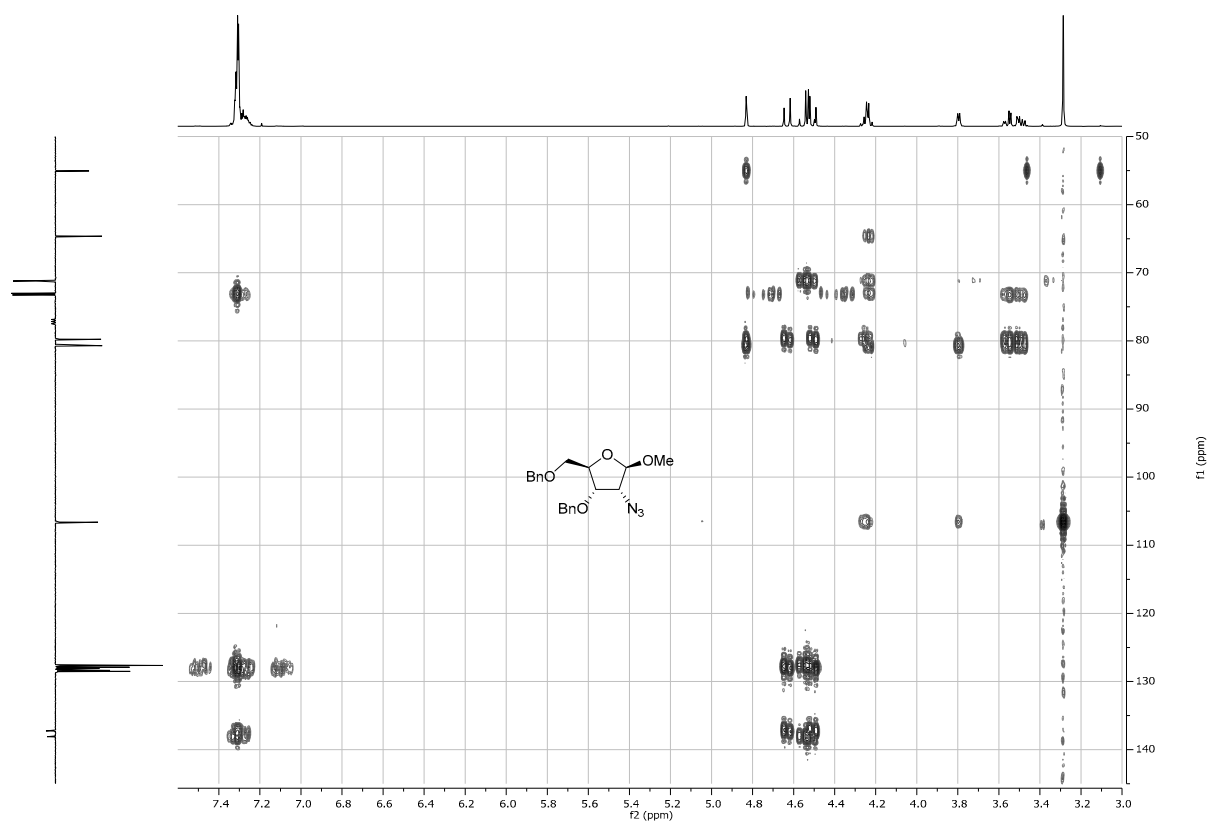

Methyl 2-azido-3,5-di-*O*-benzyl-2-deoxy- $\alpha$ -D-arabinofuranoside (**34**)

$^1\text{H}$  NMR, 400 MHz,  $\text{CDCl}_3$  of compound **34**

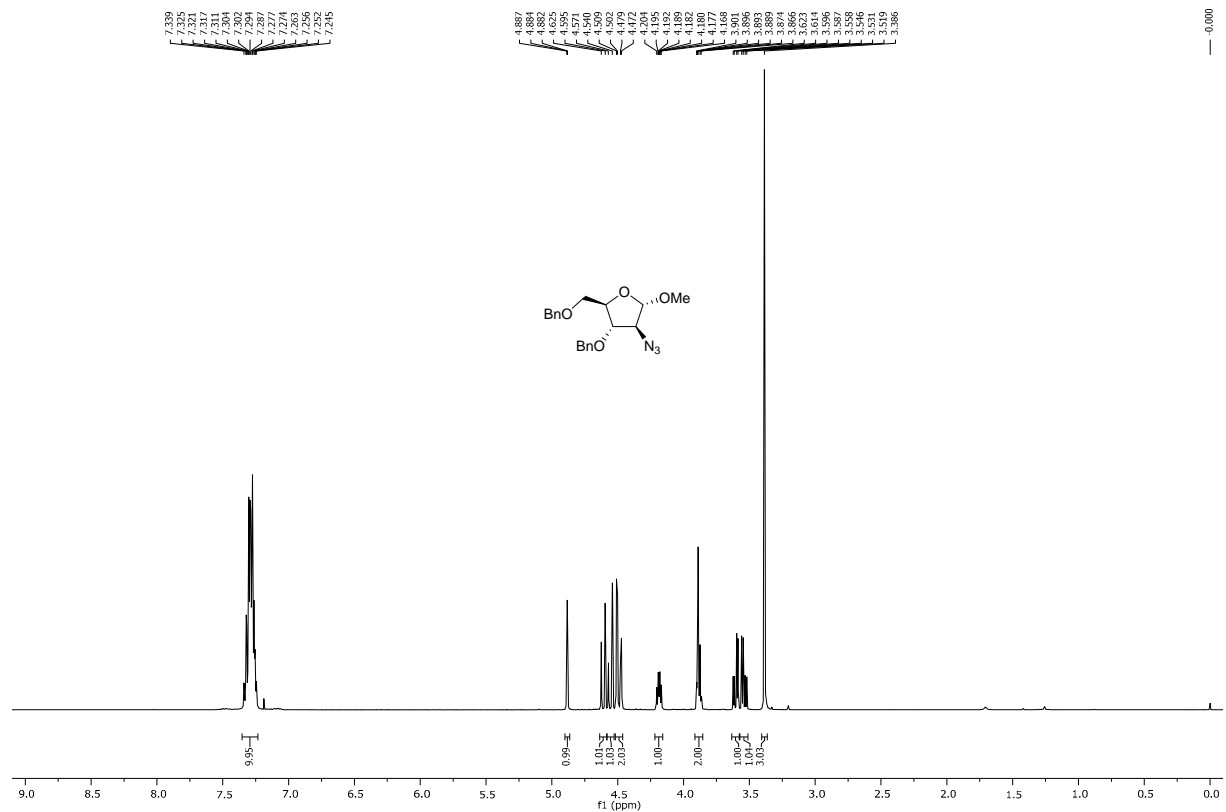

$^{13}\text{C}$ -APT NMR, 101 MHz,  $\text{CDCl}_3$  of compound **34**

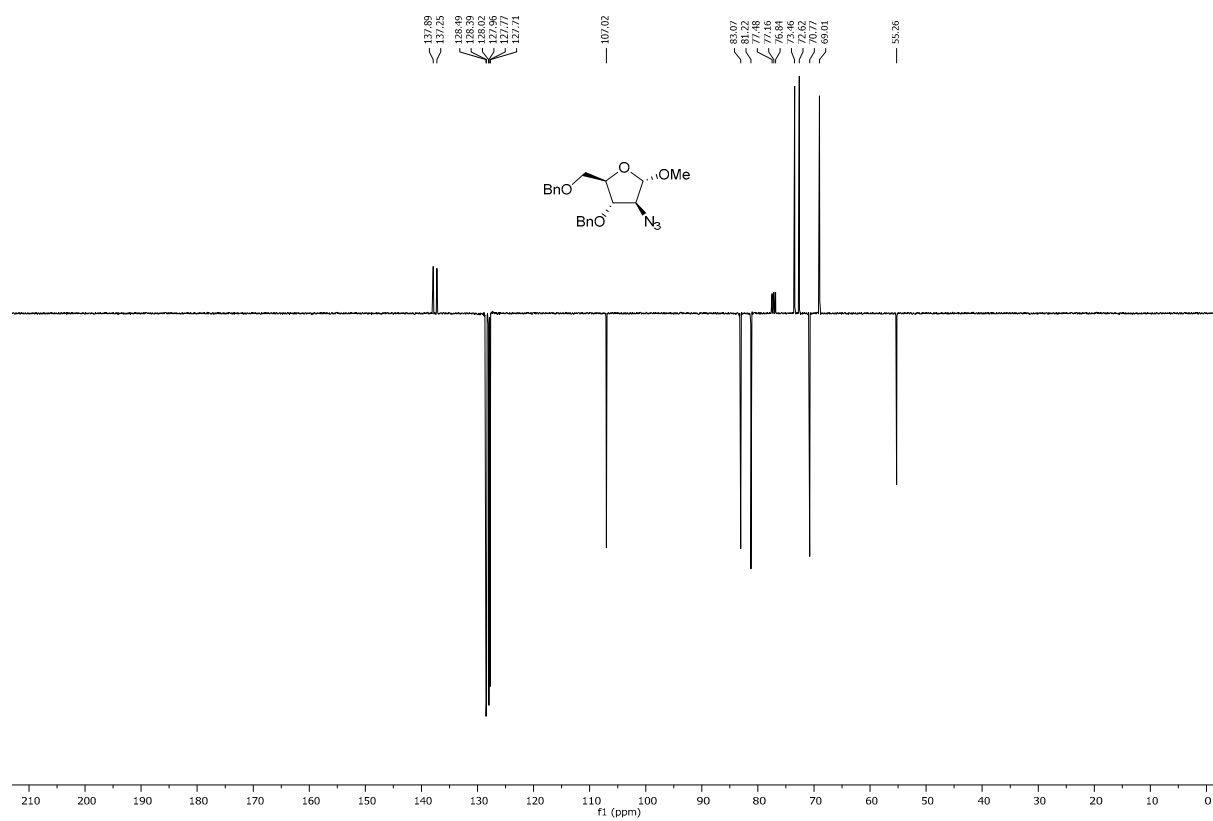

$^1\text{H}$ - $^1\text{H}$  COSY of compound **34**

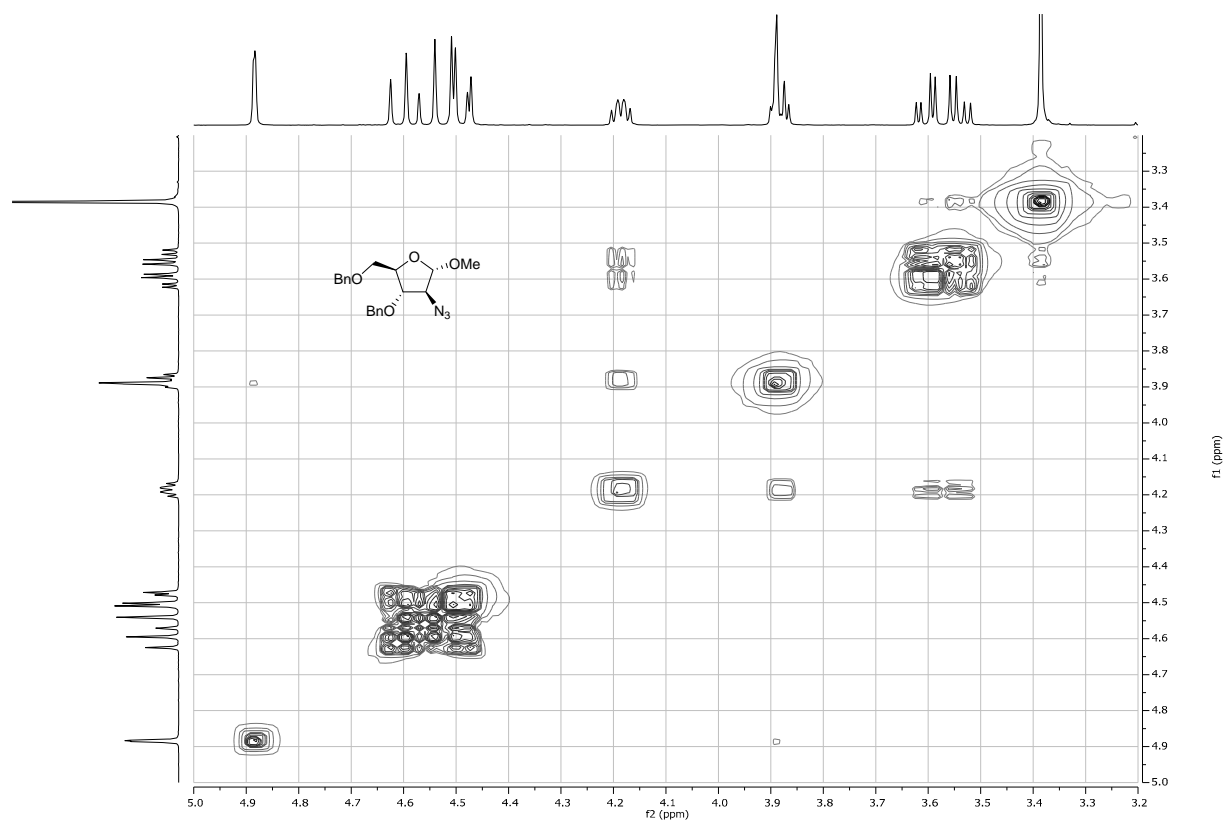



$^1\text{H}$ - $^{13}\text{C}$  HSQC of compound **34**

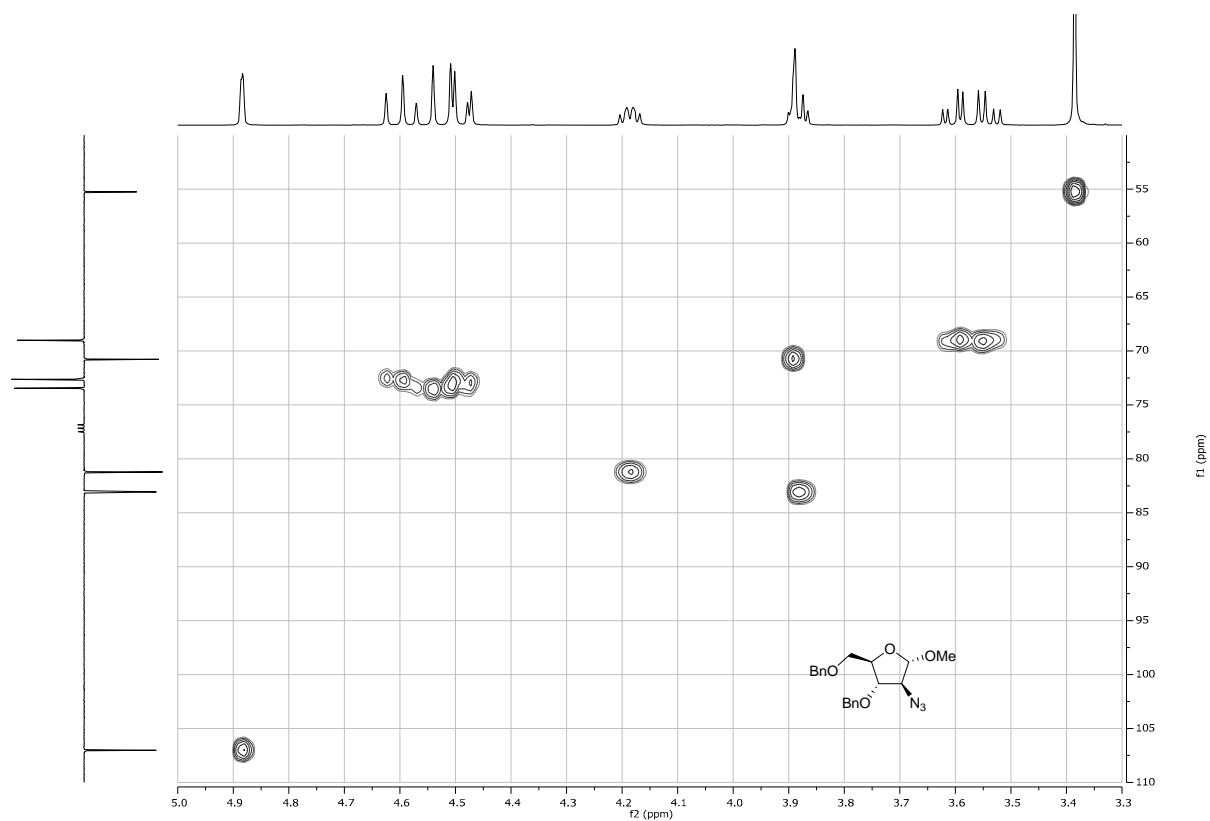

$^1\text{H}$ - $^1\text{H}$  NOESY of compound **34**

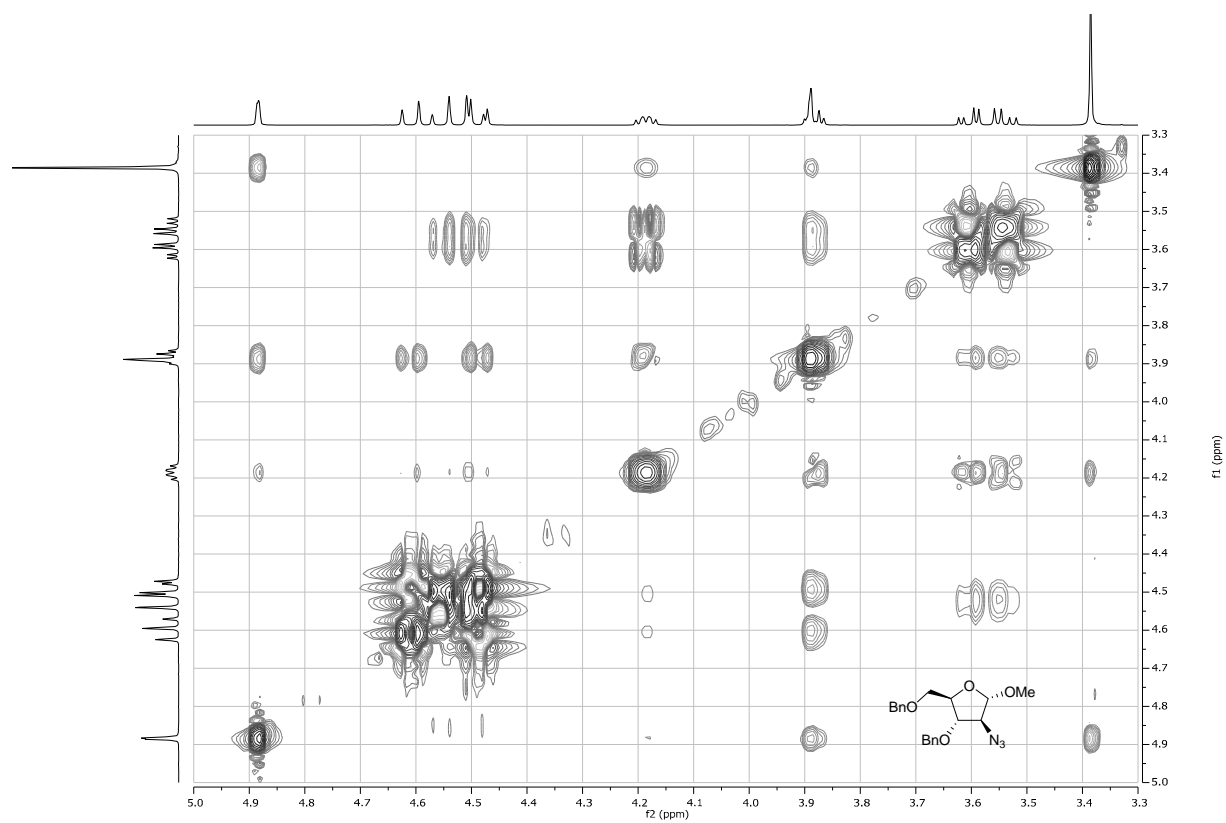

$^1\text{H}$ - $^{13}\text{C}$  HSQC-HECADE of compound **34**

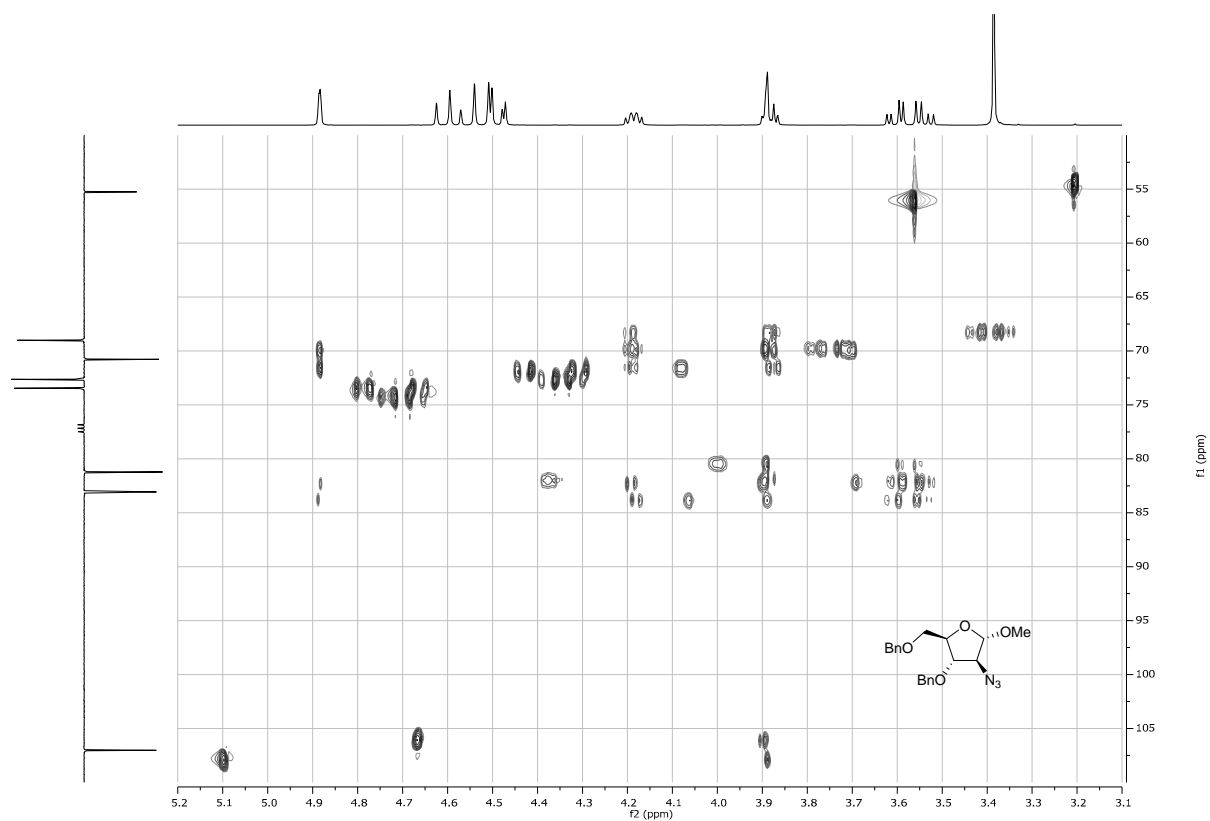

Methyl 2-azido-3,5-di-O-benzyl-2-deoxy- $\alpha$ -D-lyxofuranoside (**35**)

$^1\text{H}$  NMR, 400 MHz,  $\text{CDCl}_3$  of compound **35**

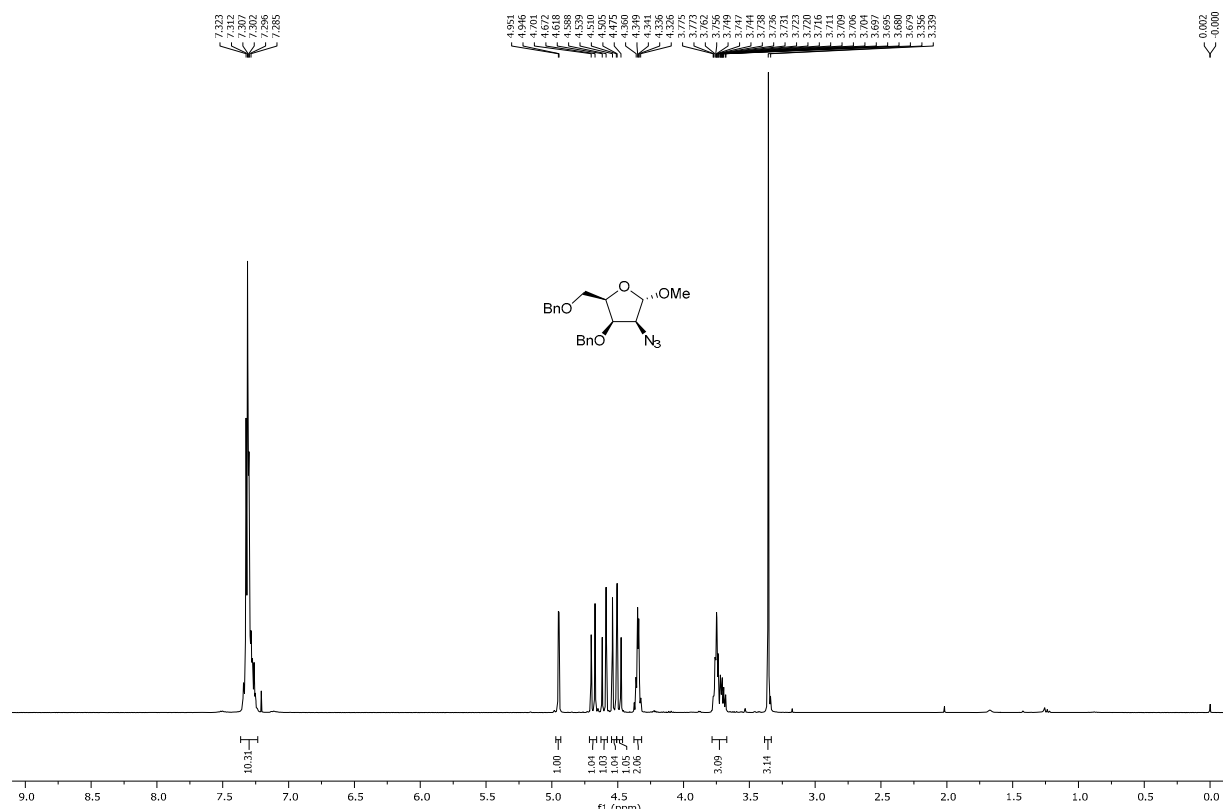

$^{13}\text{C}$ -APT NMR, 101 MHz,  $\text{CDCl}_3$  of compound **35**

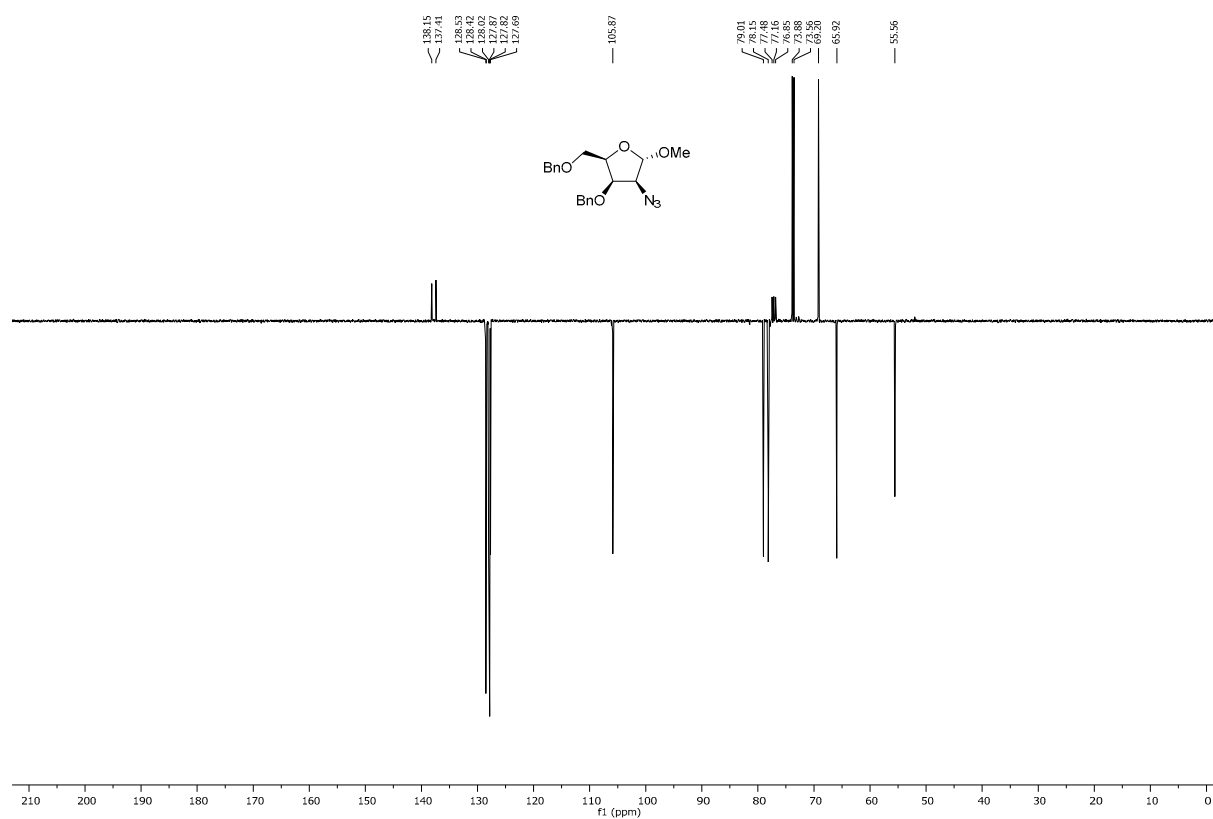

$^1\text{H}$ - $^1\text{H}$  COSY of compound **35**

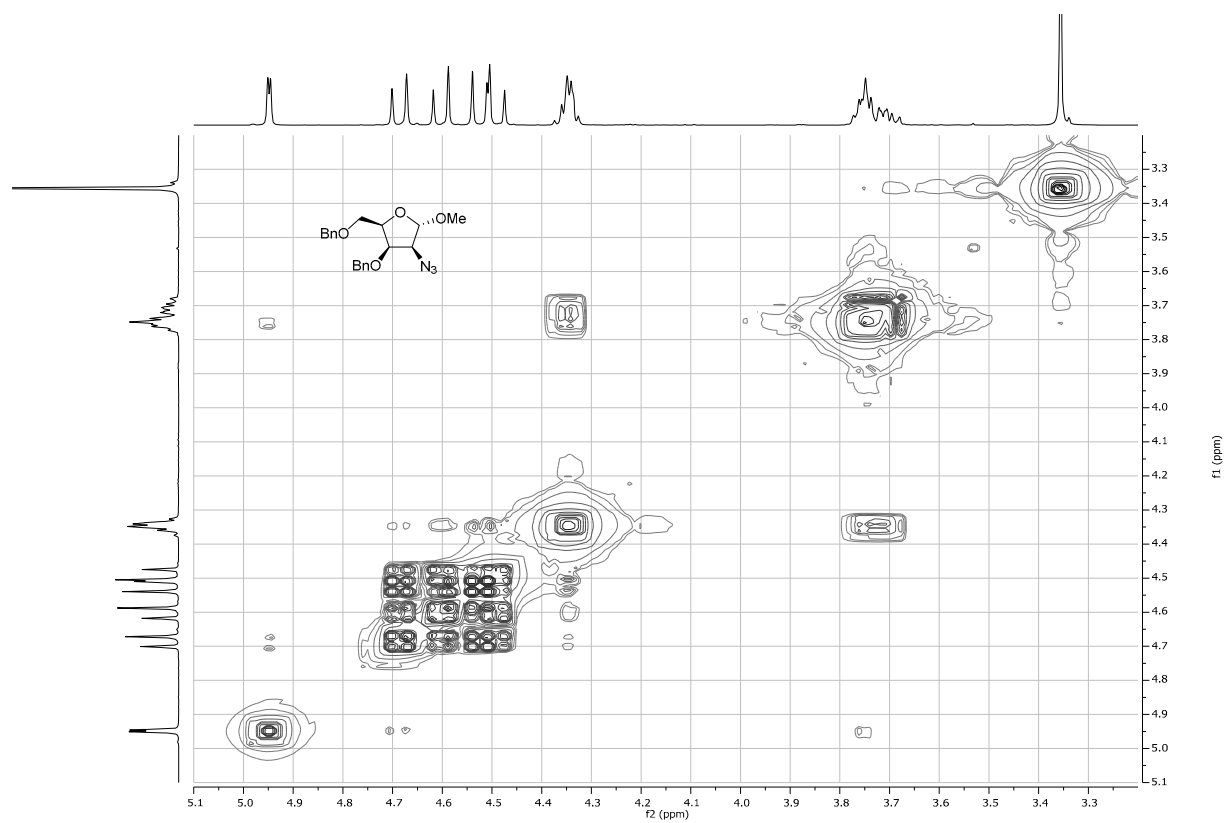

$^1\text{H}$ - $^{13}\text{C}$  HSQC of compound **35**

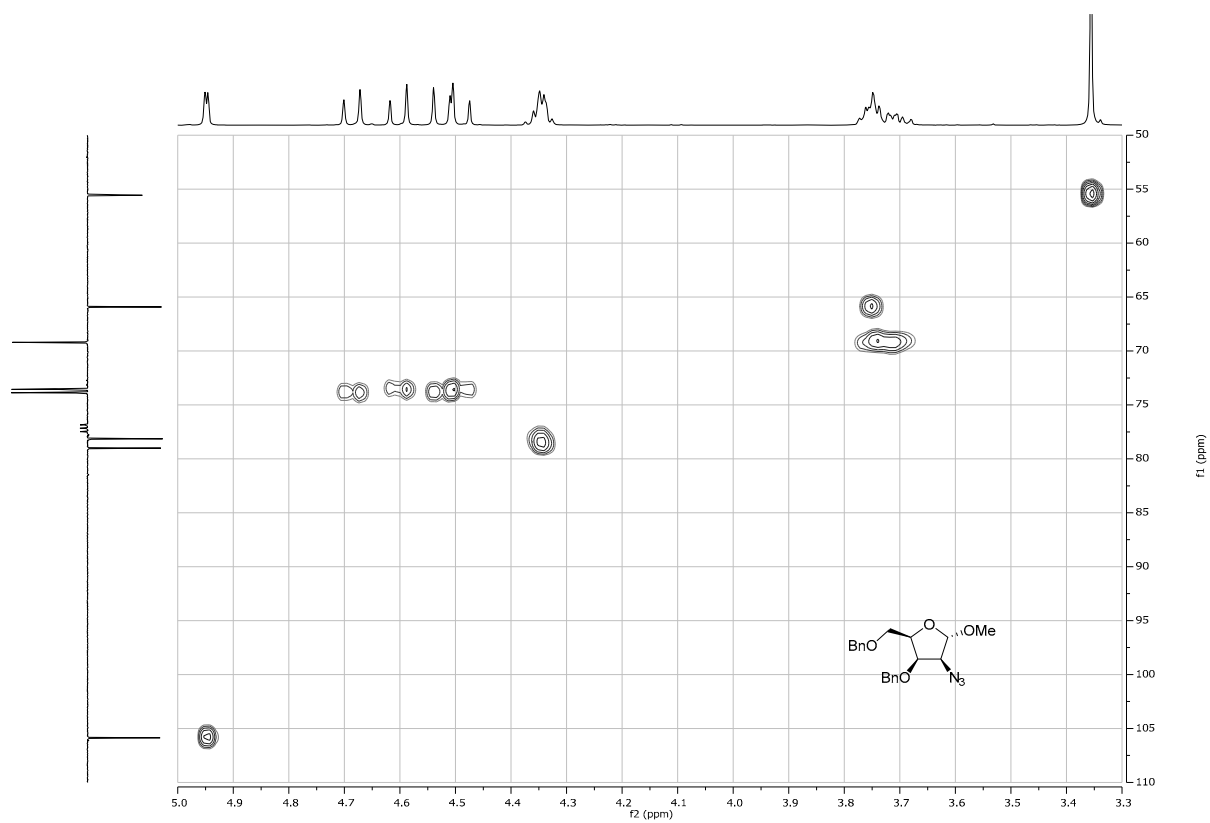

$^1\text{H}$ - $^{13}\text{C}$  HSQC-HECADE of compound **35**

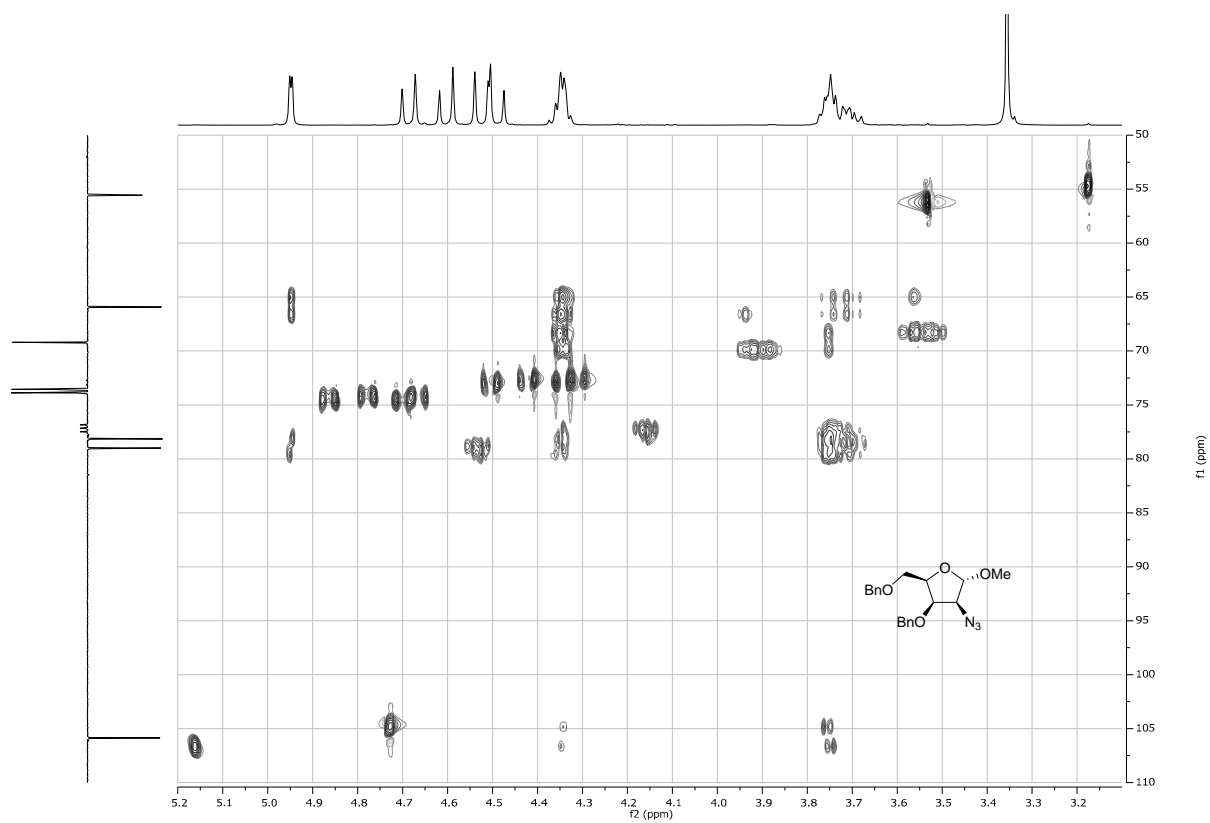

# Methyl 3,5-di-O-benzyl-2-deoxy-2-fluoro- $\alpha$ -D-ribofuranoside (**37 $\alpha$** )

$^1\text{H}$  NMR, 400 MHz,  $\text{CDCl}_3$  of compound **37 $\alpha$**

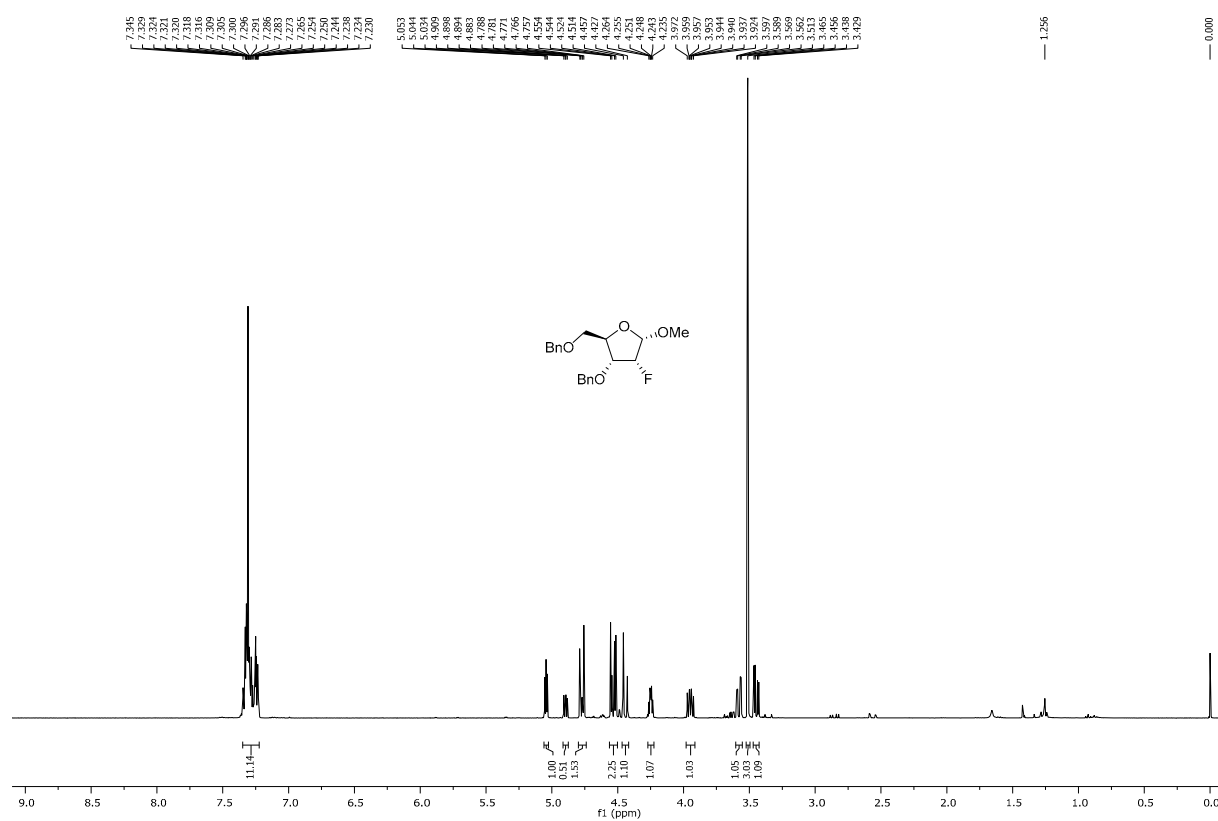

$^{19}\text{F}$ -decoupled  $^1\text{H}$  NMR, (-210 ppm)

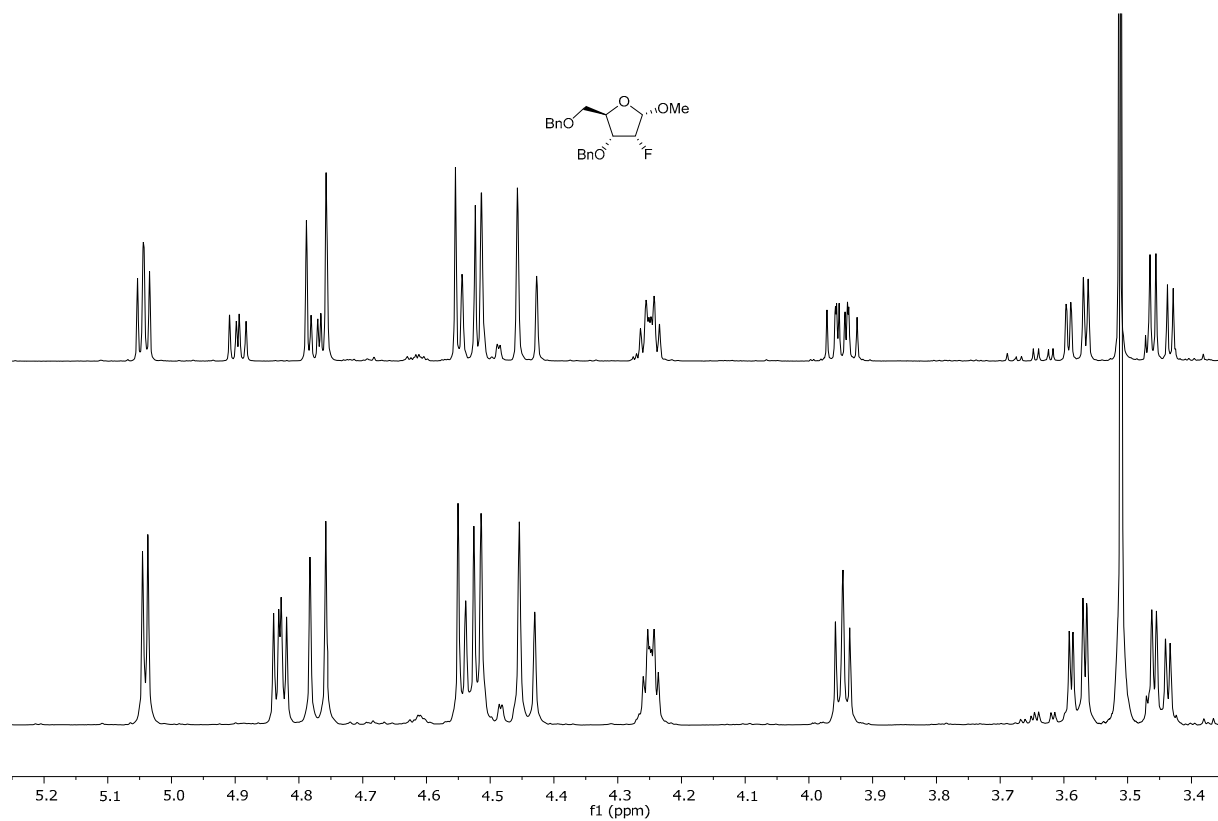

$^{13}\text{C}$ -APT NMR, 101 MHz,  $\text{CDCl}_3$  of compound **37 $\alpha$**

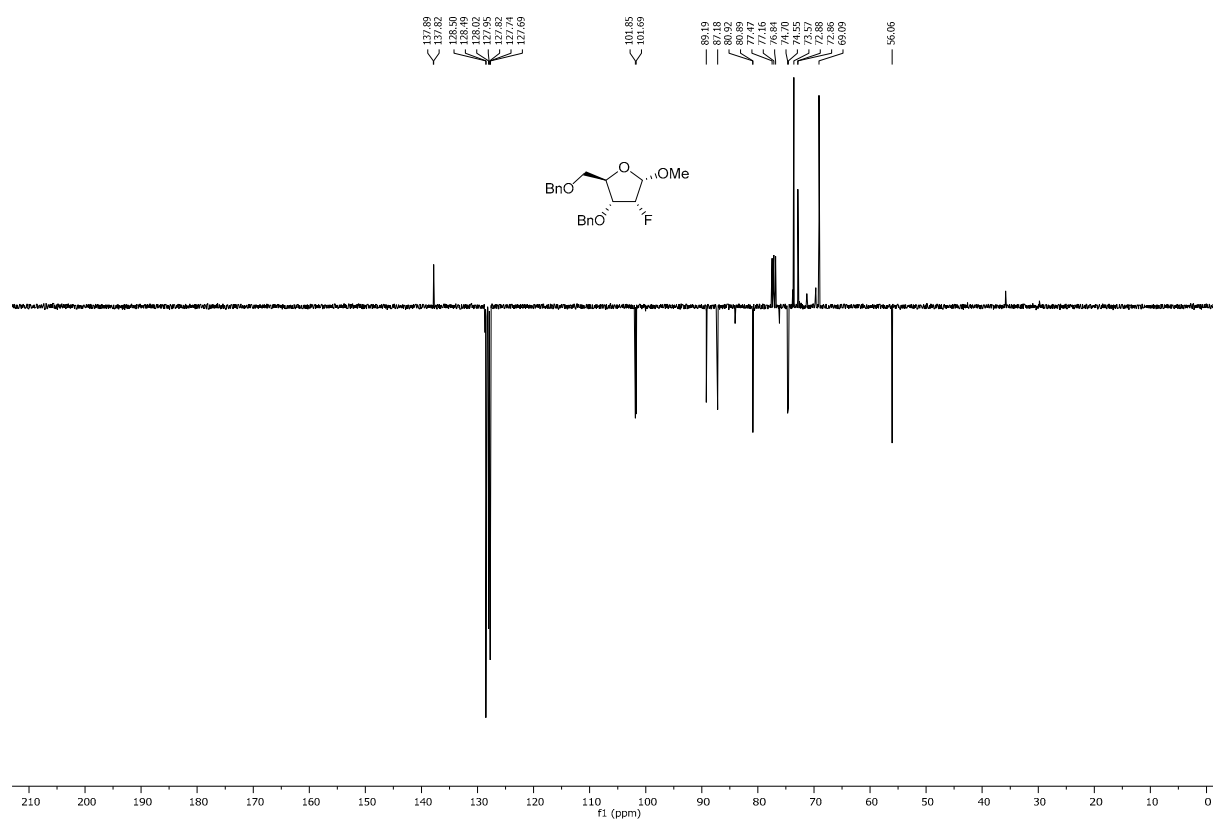

$^{19}\text{F}$  NMR, 471 MHz,  $\text{CDCl}_3$  of compound **37 $\alpha$**

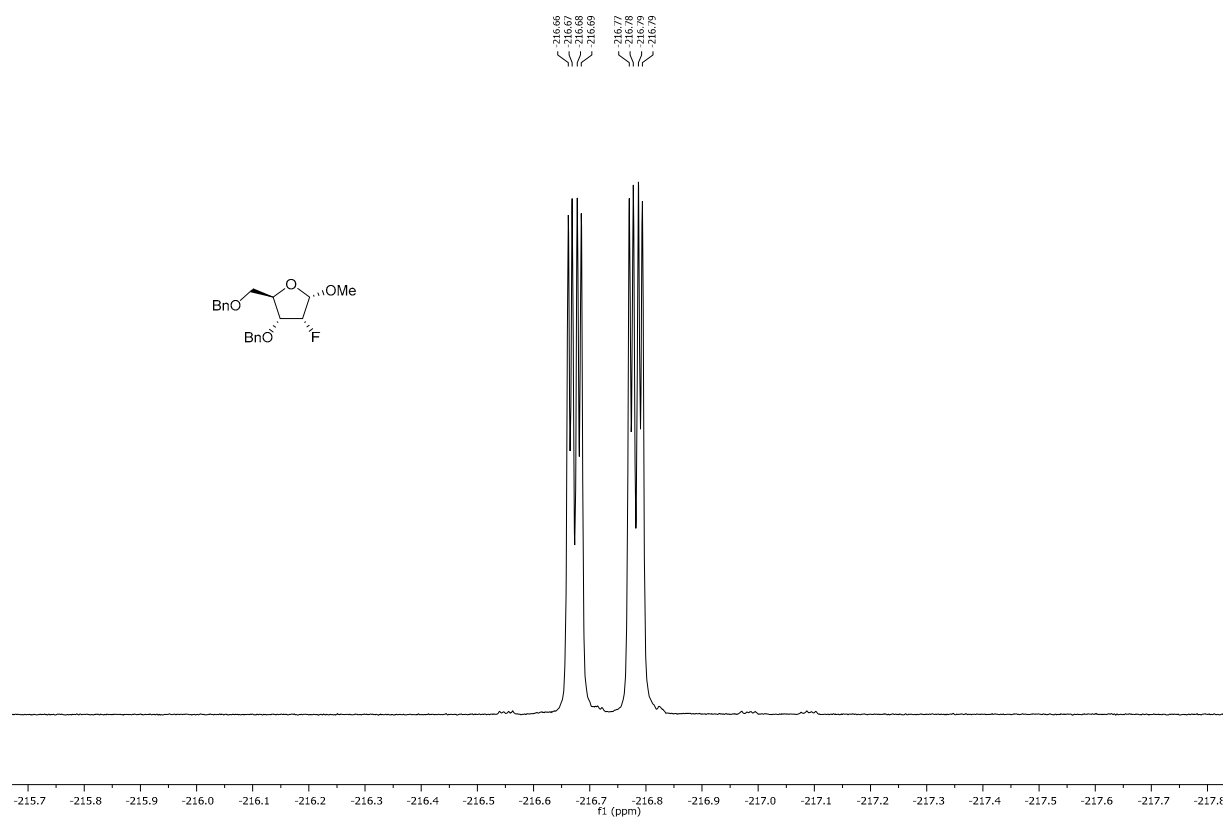

$^1\text{H}$ - $^1\text{H}$  COSY of compound **37 $\alpha$**

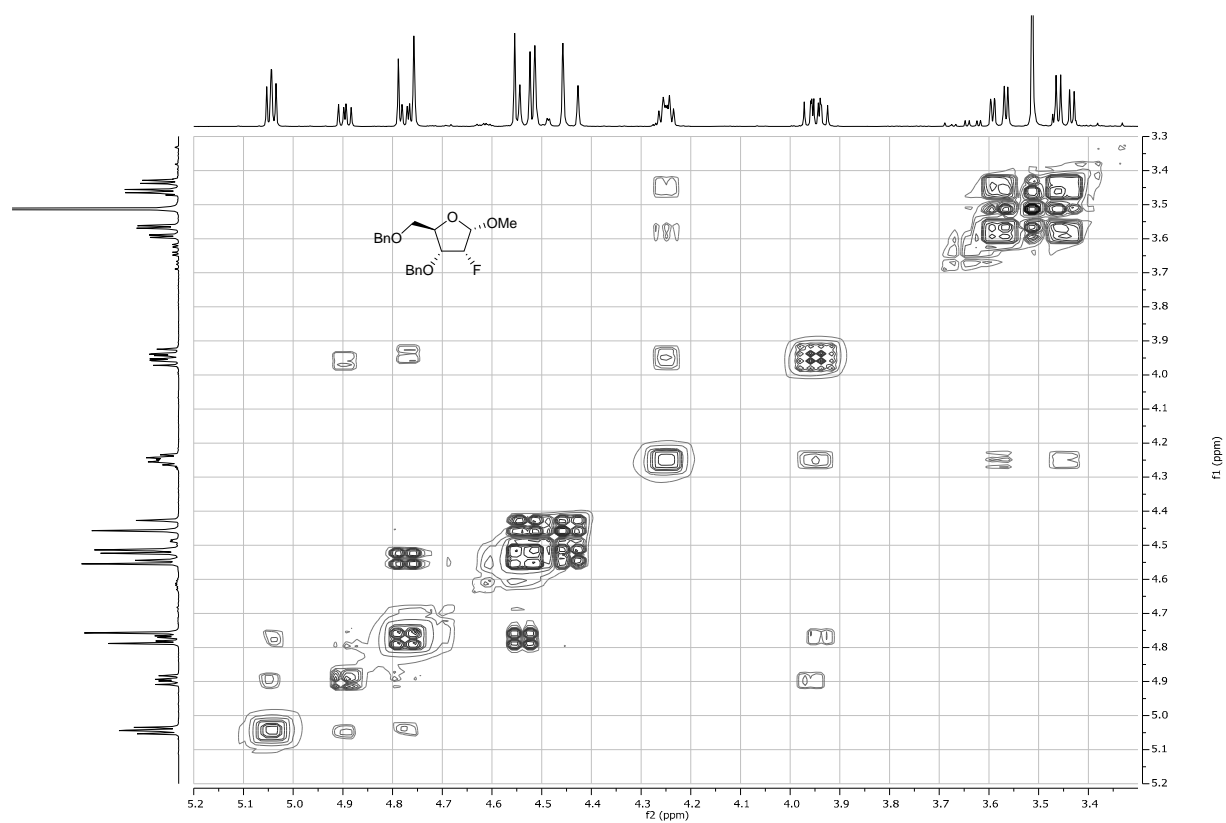

$^1\text{H}$ - $^{13}\text{C}$  HSQC of compound **37 $\alpha$**

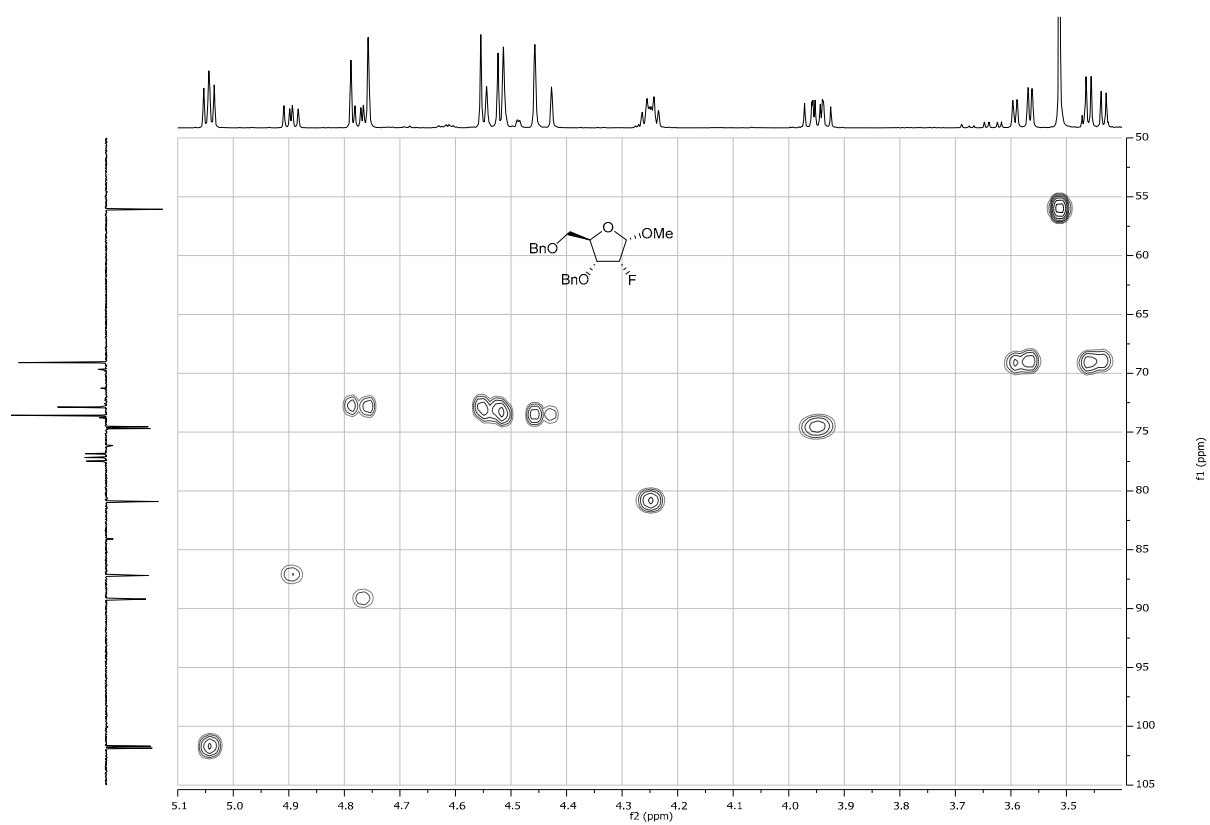

$^1\text{H}$ - $^{13}\text{C}$  HMBC of compound **37 $\alpha$**

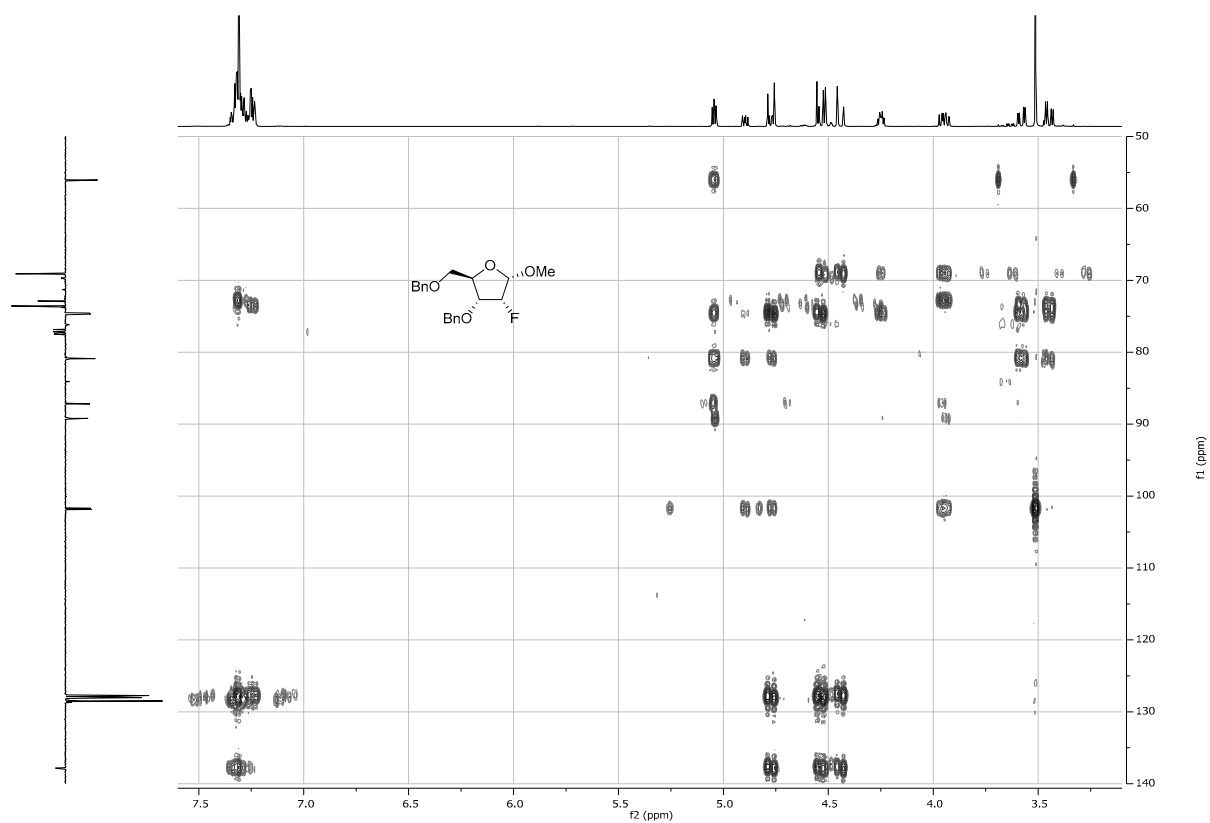

$^1\text{H}$ - $^1\text{H}$  NOESY of compound **37 $\alpha$**

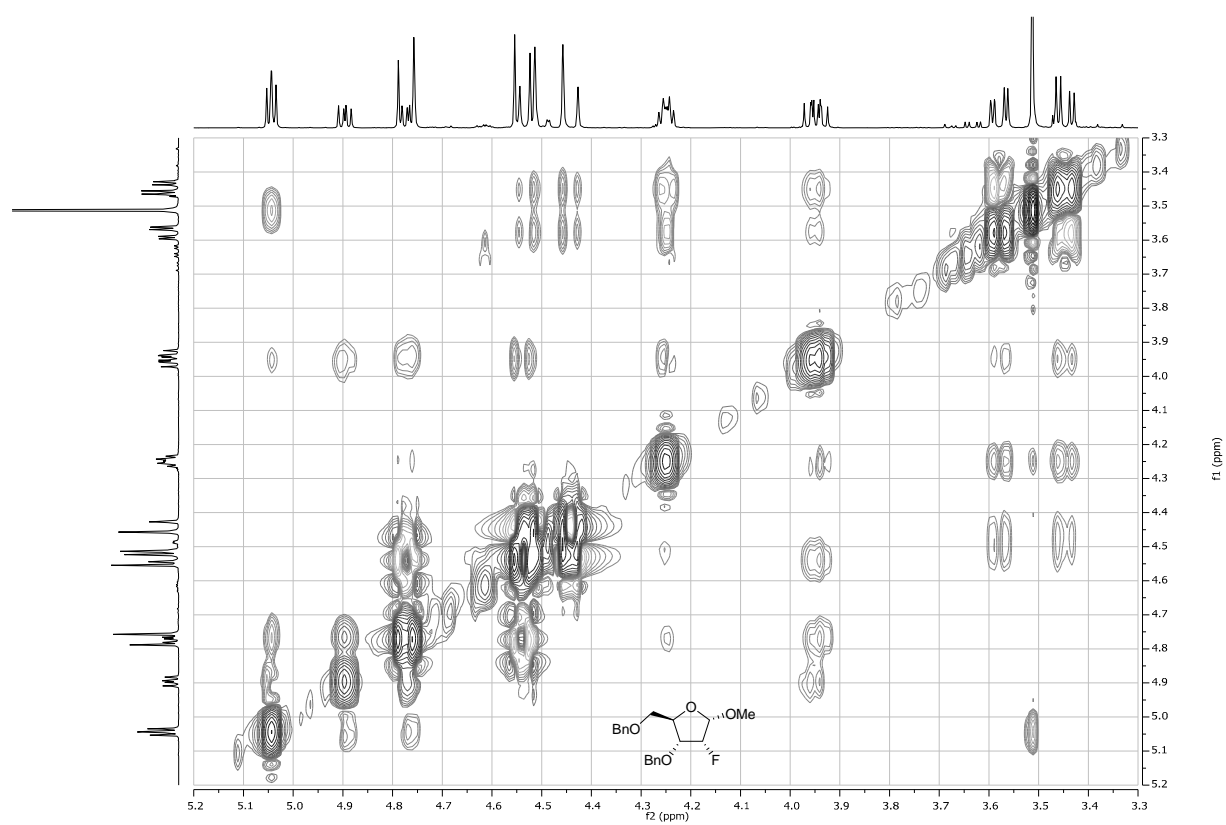



$^1\text{H}$ - $^{13}\text{C}$  HSQC-HECADE of compound **37 $\alpha$**

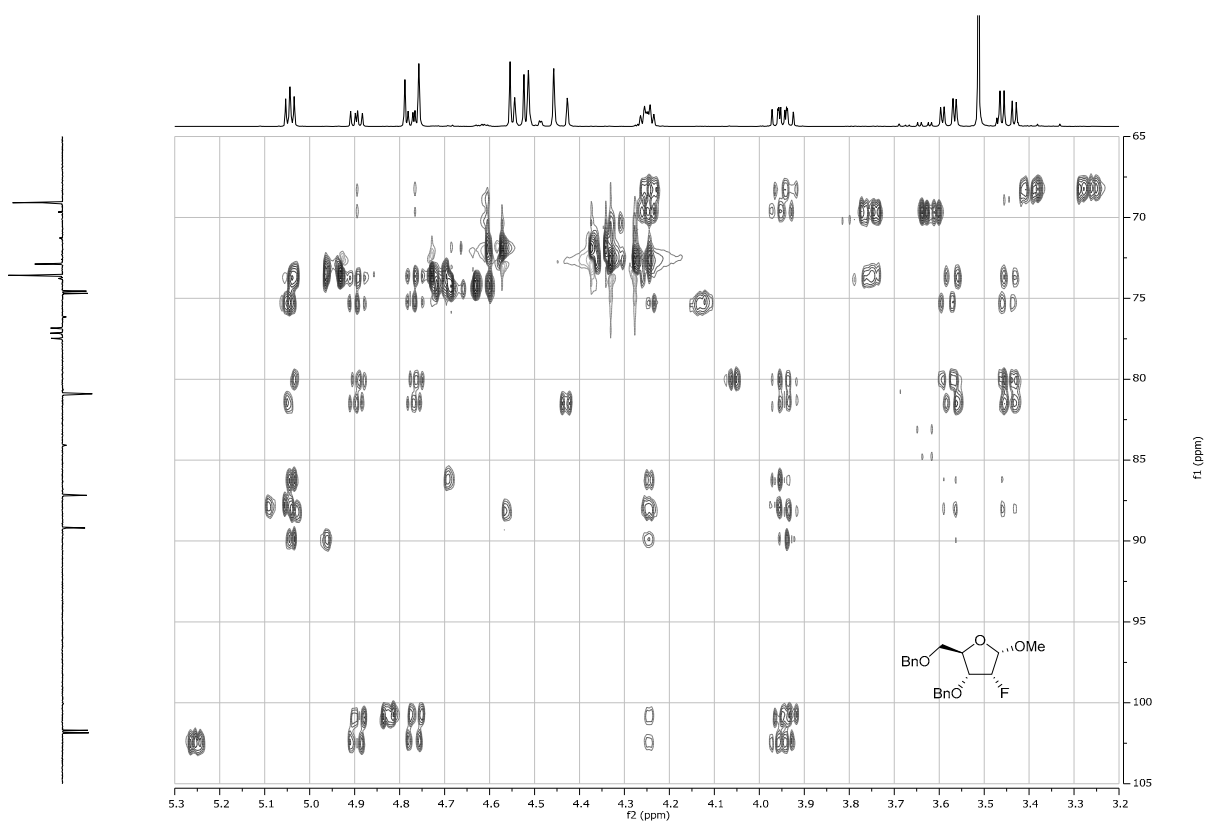

Methyl 3,5-di-O-benzyl-2-deoxy-2-fluoro- $\beta$ -D-ribofuranoside (**37 $\beta$** )

$^1\text{H}$  NMR, 400 MHz,  $\text{CDCl}_3$  of compound **37 $\beta$**

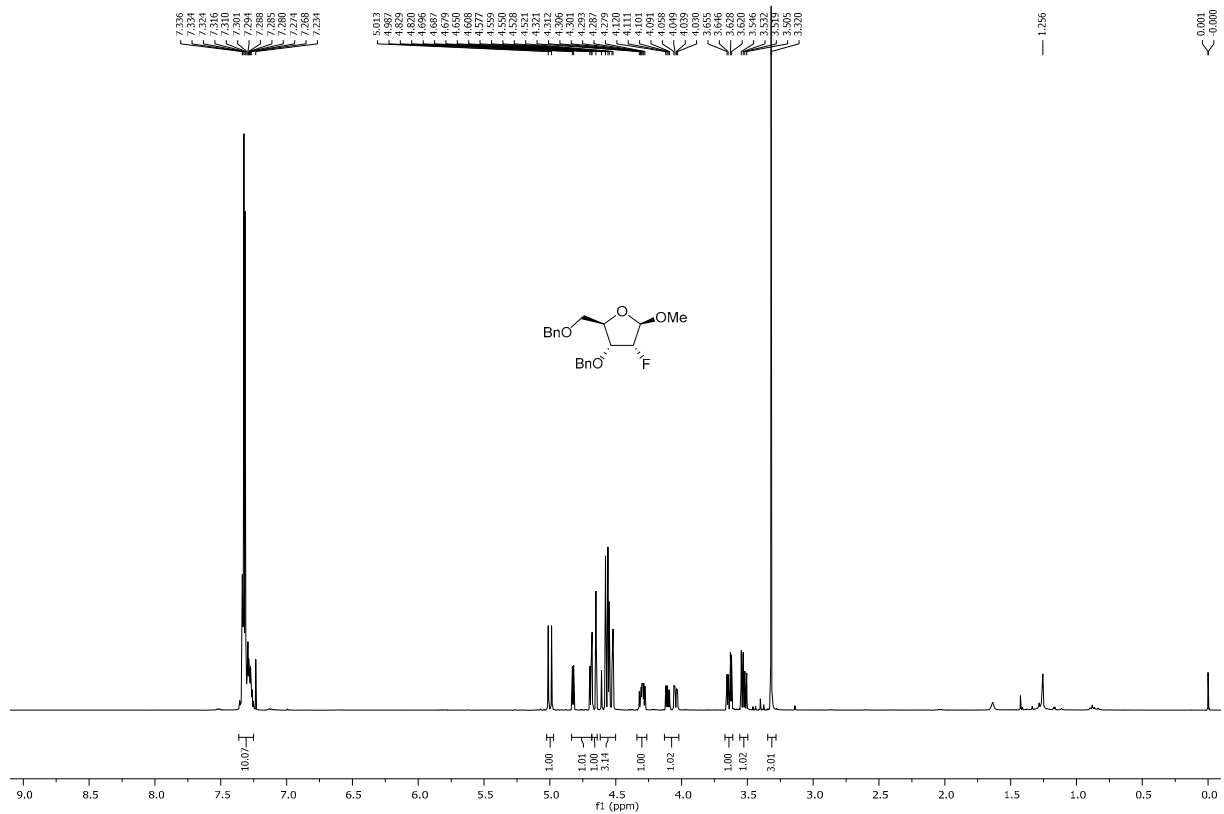

$^{13}\text{C}$ -APT NMR, 101 MHz,  $\text{CDCl}_3$  of compound **37 $\beta$**

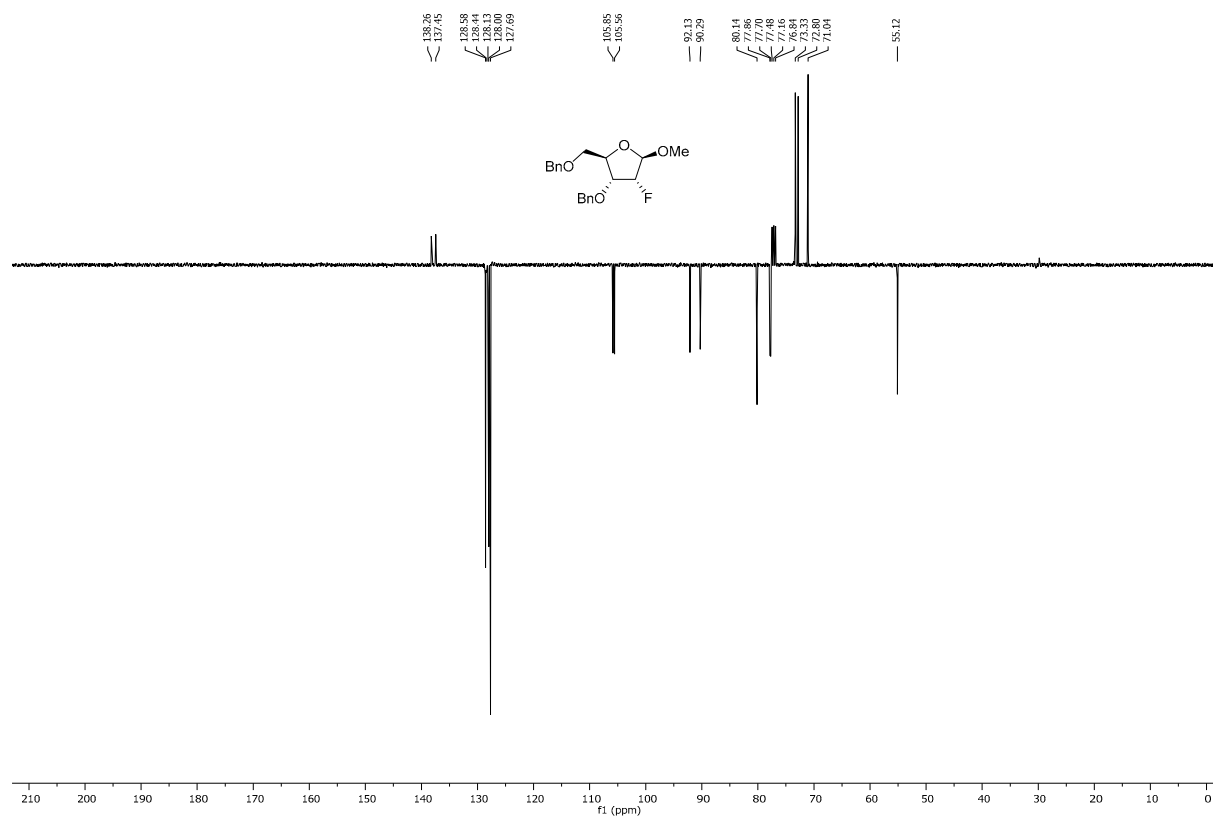

$^{19}\text{F}$  NMR, 471 MHz,  $\text{CDCl}_3$  of compound **37 $\beta$**

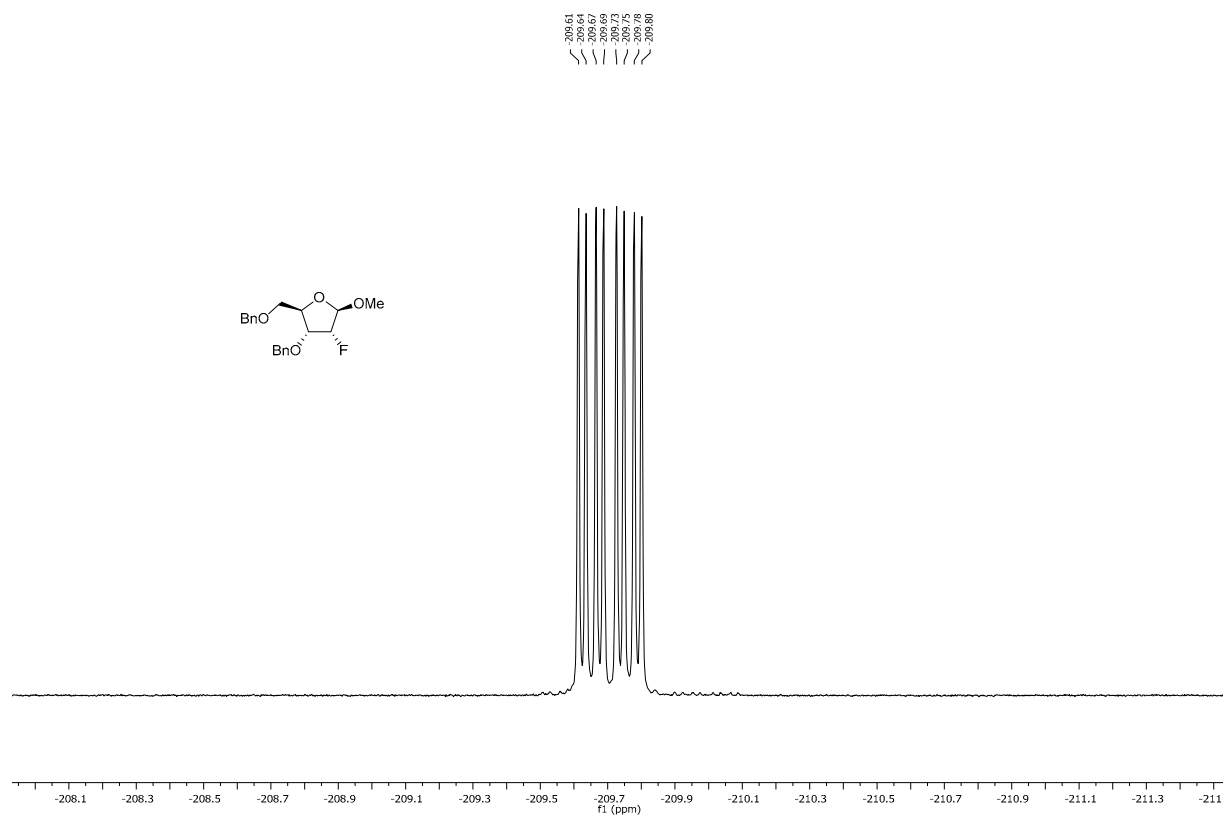

$^1\text{H}$ - $^1\text{H}$  COSY of compound **37 $\beta$**

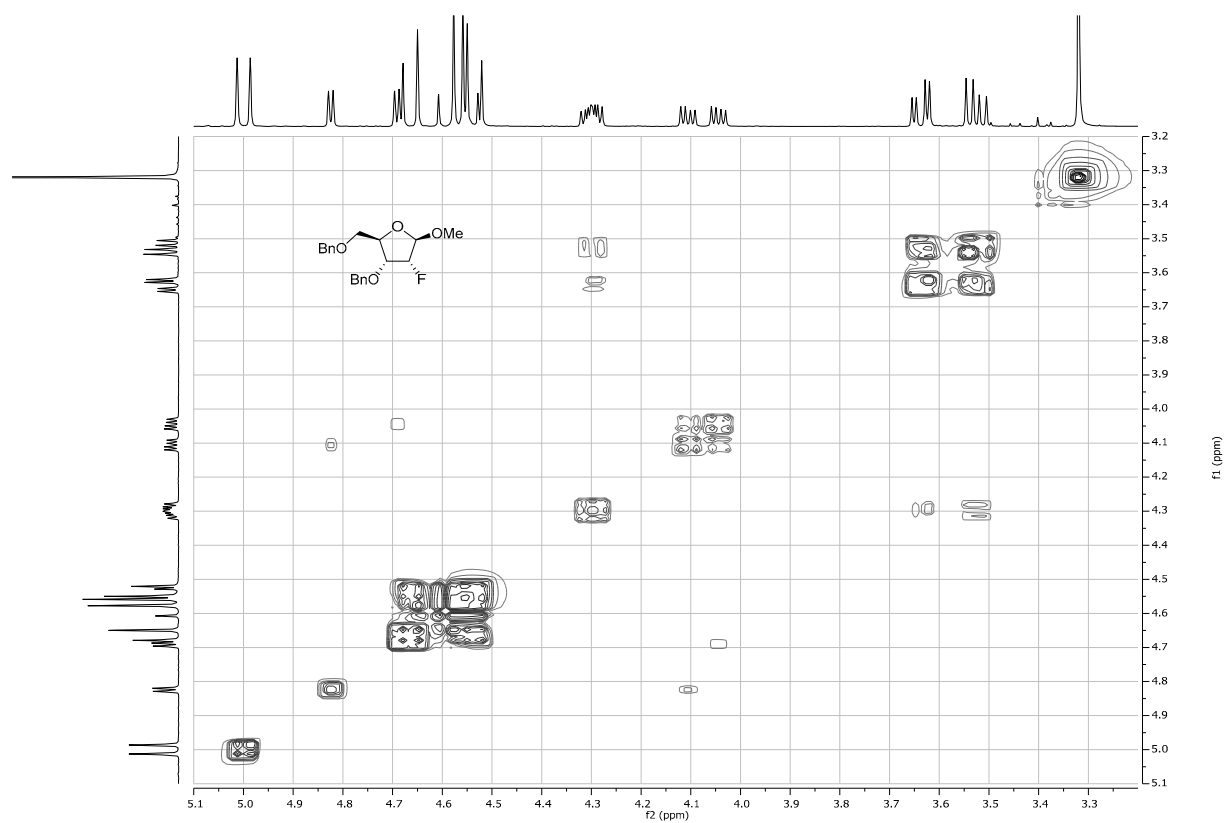

$^1\text{H}$ - $^{13}\text{C}$  HSQC of compound **37 $\beta$**

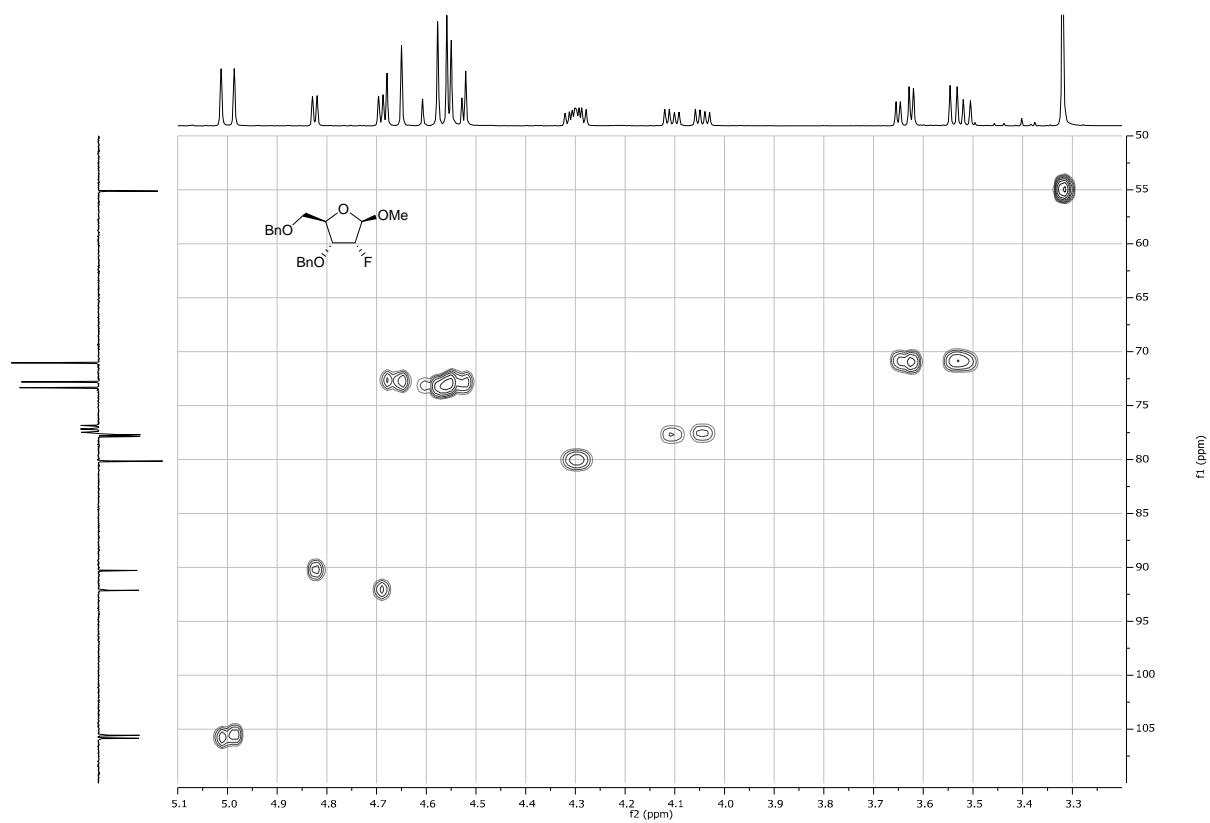

$^1\text{H}$ - $^{13}\text{C}$  HMBC of compound **37 $\beta$**

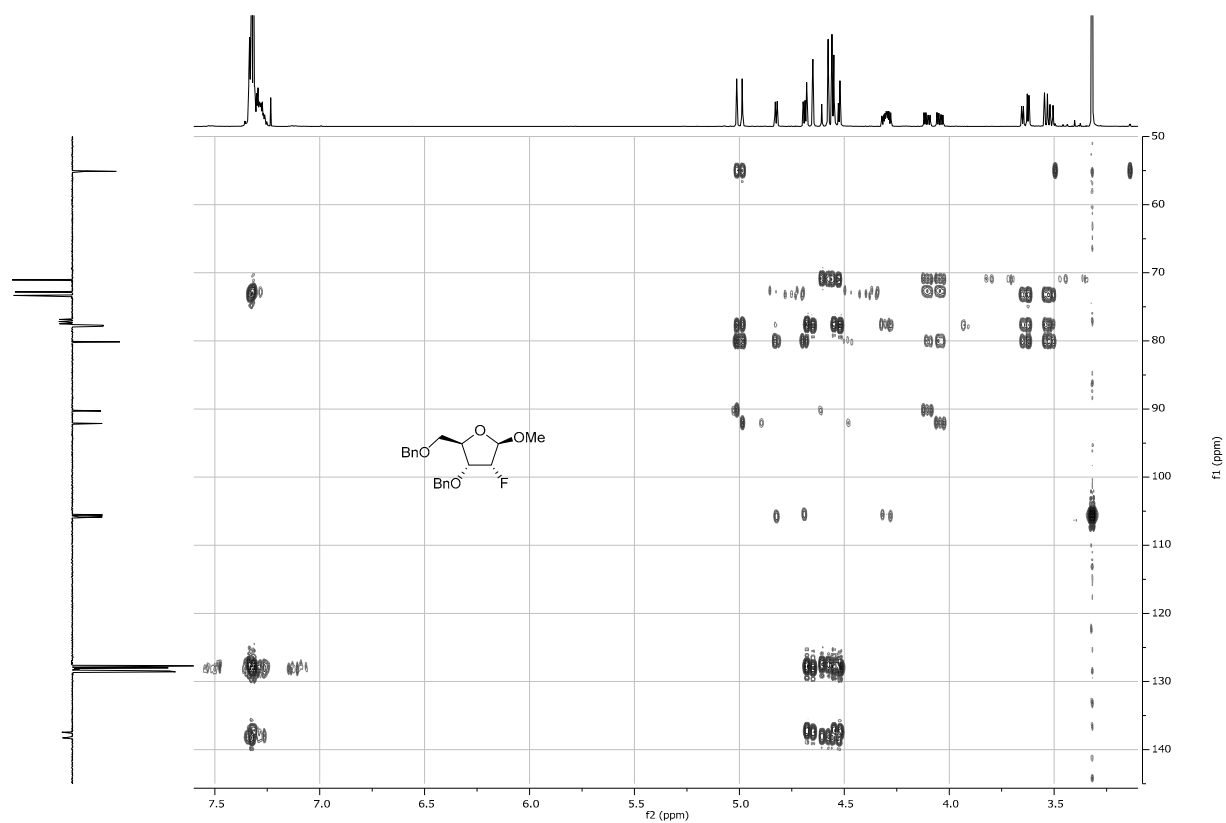

$^1\text{H}$ - $^1\text{H}$  NOESY of compound **37 $\beta$**

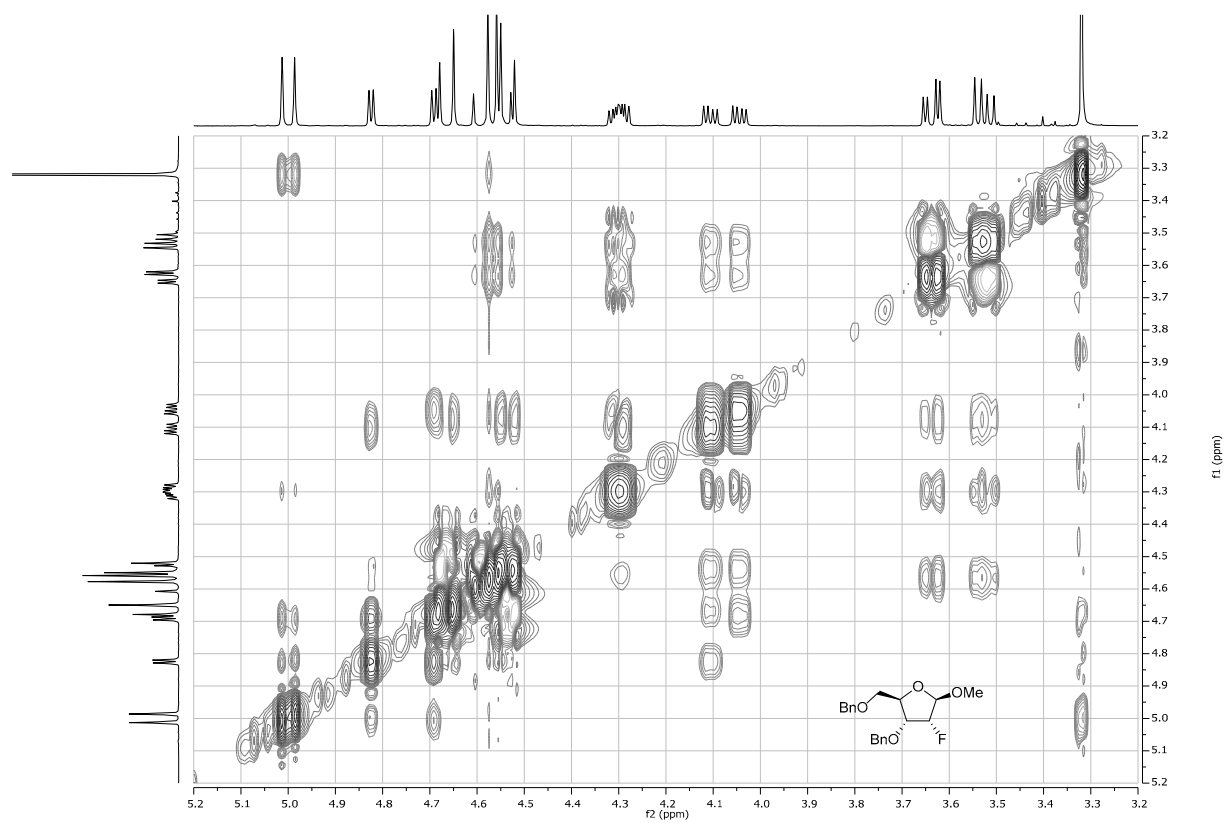

# Methyl 3,5-di-O-benzyl-2-deoxy-2-fluoro- $\alpha$ -D-arabinofuranoside (38)

$^1\text{H}$  NMR, 500 MHz,  $\text{CDCl}_3$  of compound **38**

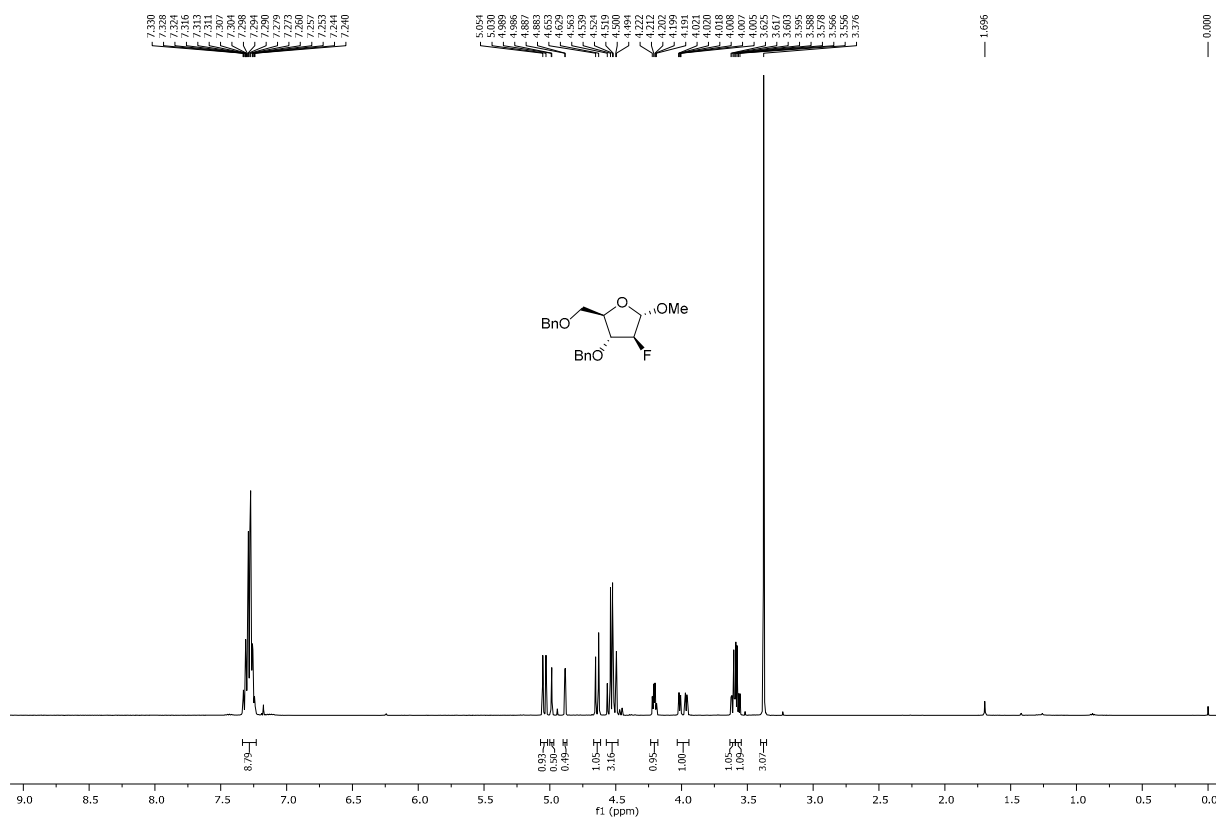

$^{13}\text{C}$ -APT NMR, 126 MHz,  $\text{CDCl}_3$  of compound **38**

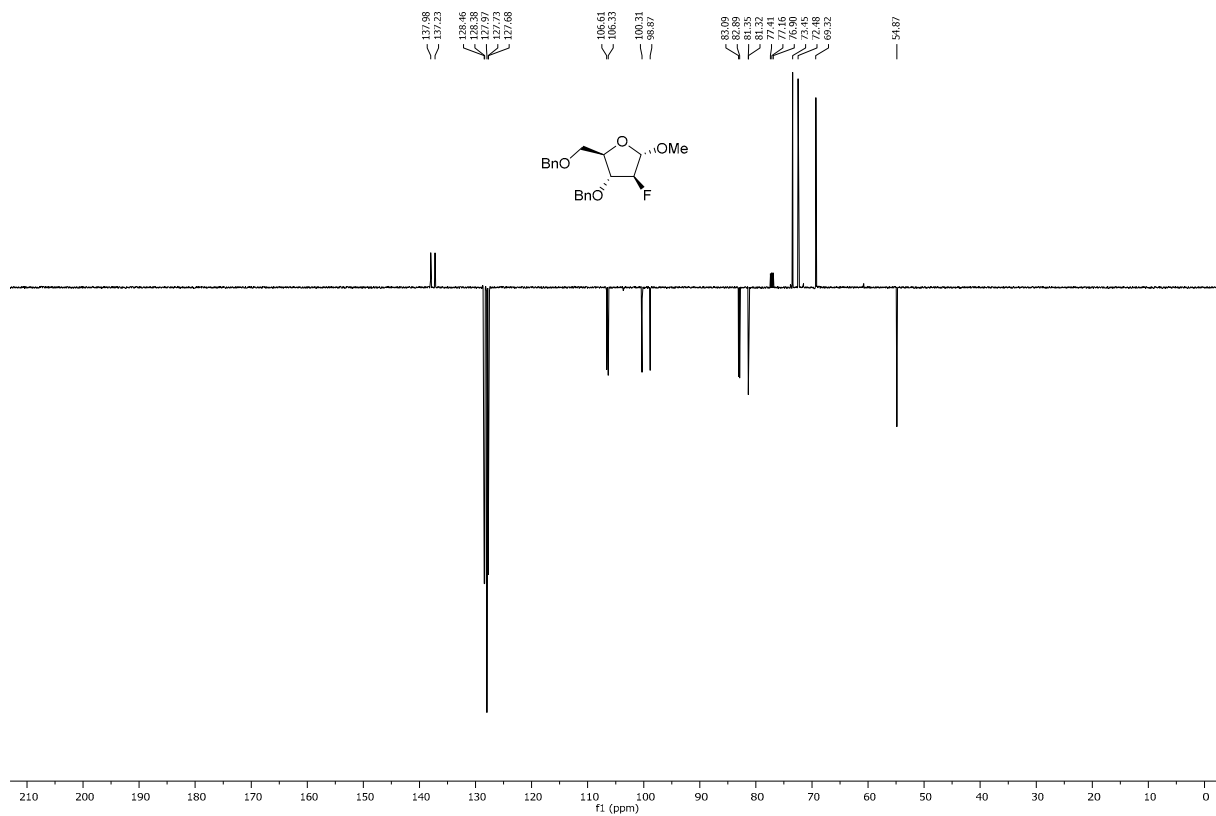

$^{19}\text{F}$  NMR, 471 MHz,  $\text{CDCl}_3$  of compound **38**

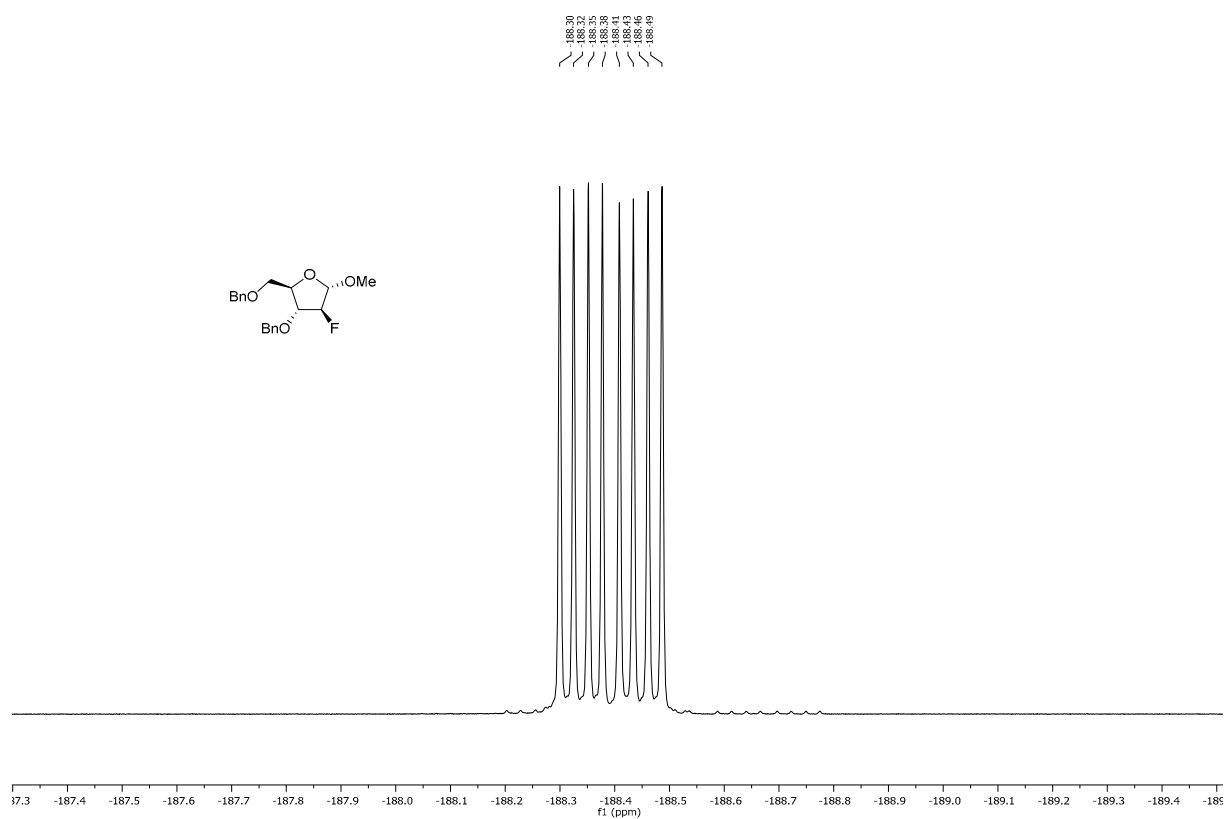

$^1\text{H}$ - $^1\text{H}$  COSY of compound **38**

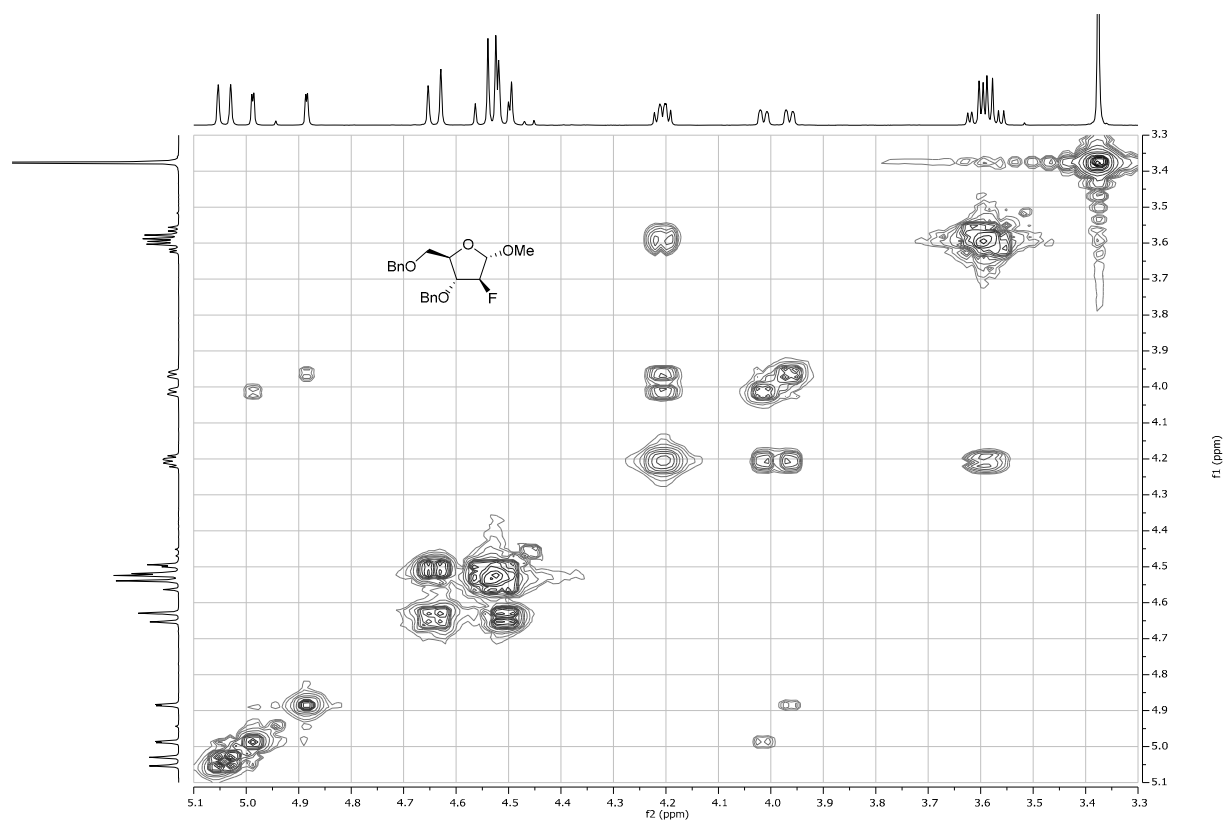

$^1\text{H}$ - $^{13}\text{C}$  HSQC of compound **38**

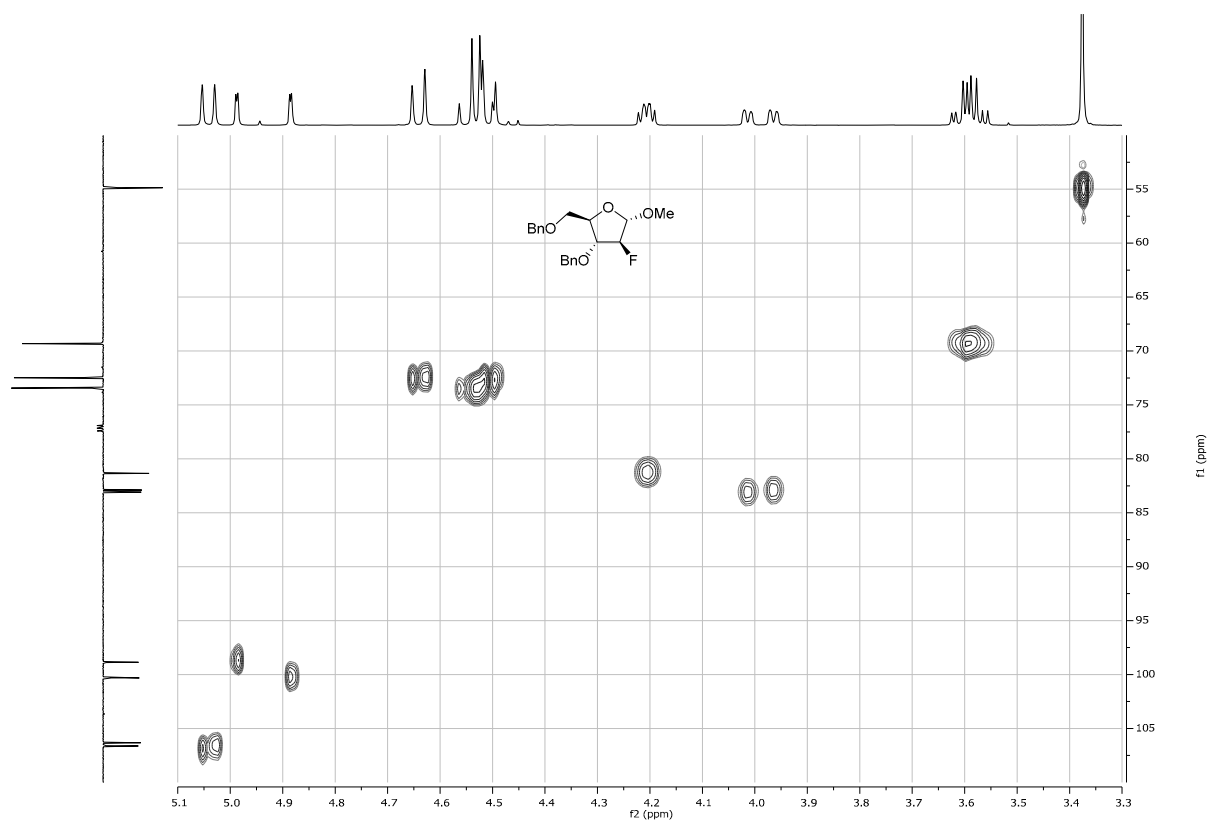

$^1\text{H}$ - $^{13}\text{C}$  HSQC-HECADE of compound **38**

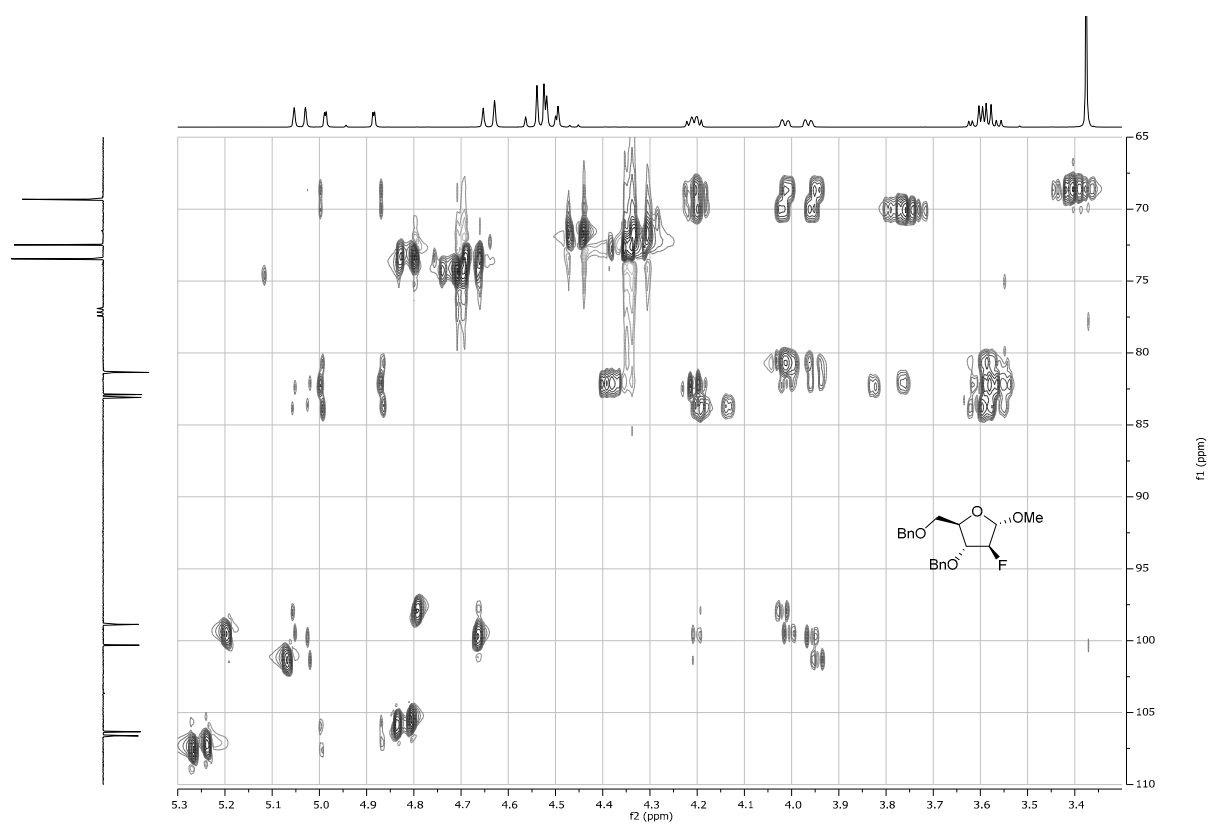

# Methyl 3,5-di-O-benzyl-2-deoxy-2-fluoro- $\alpha$ -D-lyxofuranoside (39)

$^1\text{H}$  NMR, 500 MHz,  $\text{CDCl}_3$  of compound 39

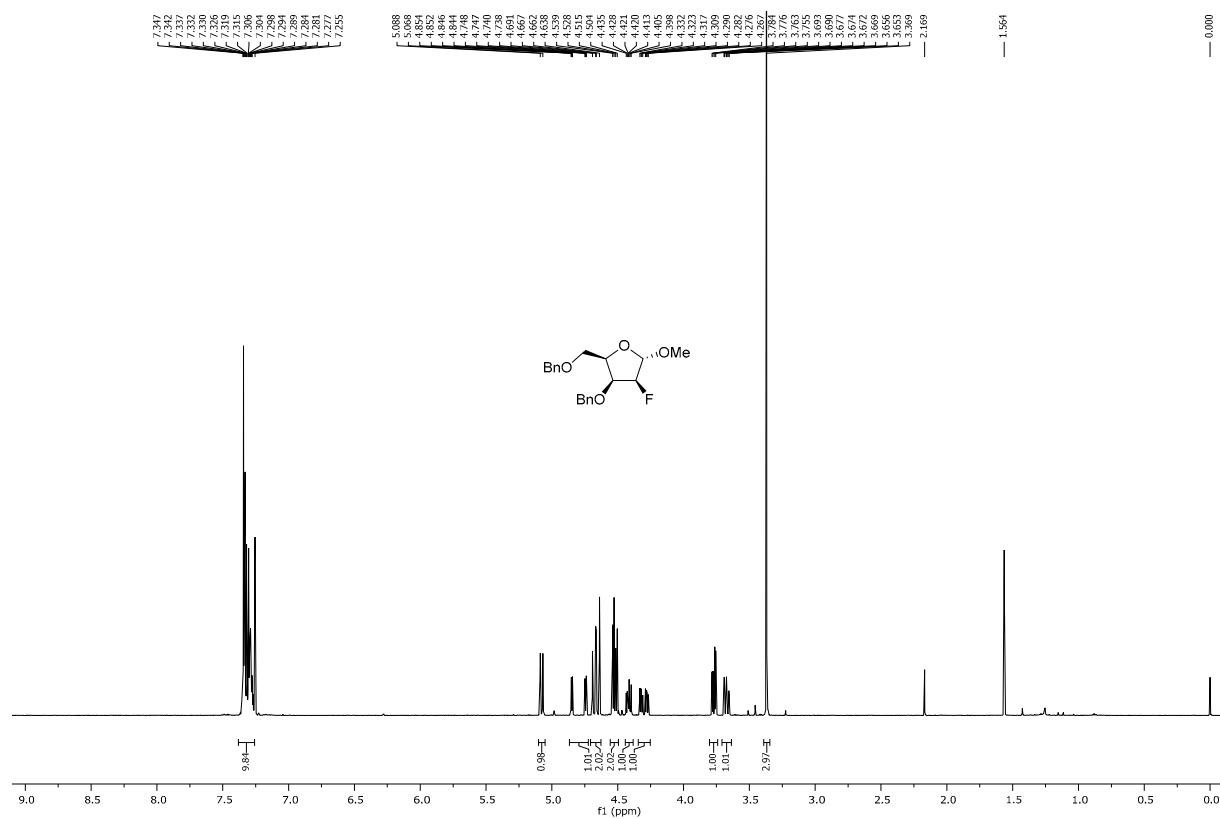

$^{19}\text{F}$ -decoupled  $^1\text{H}$  NMR, (-208 ppm)

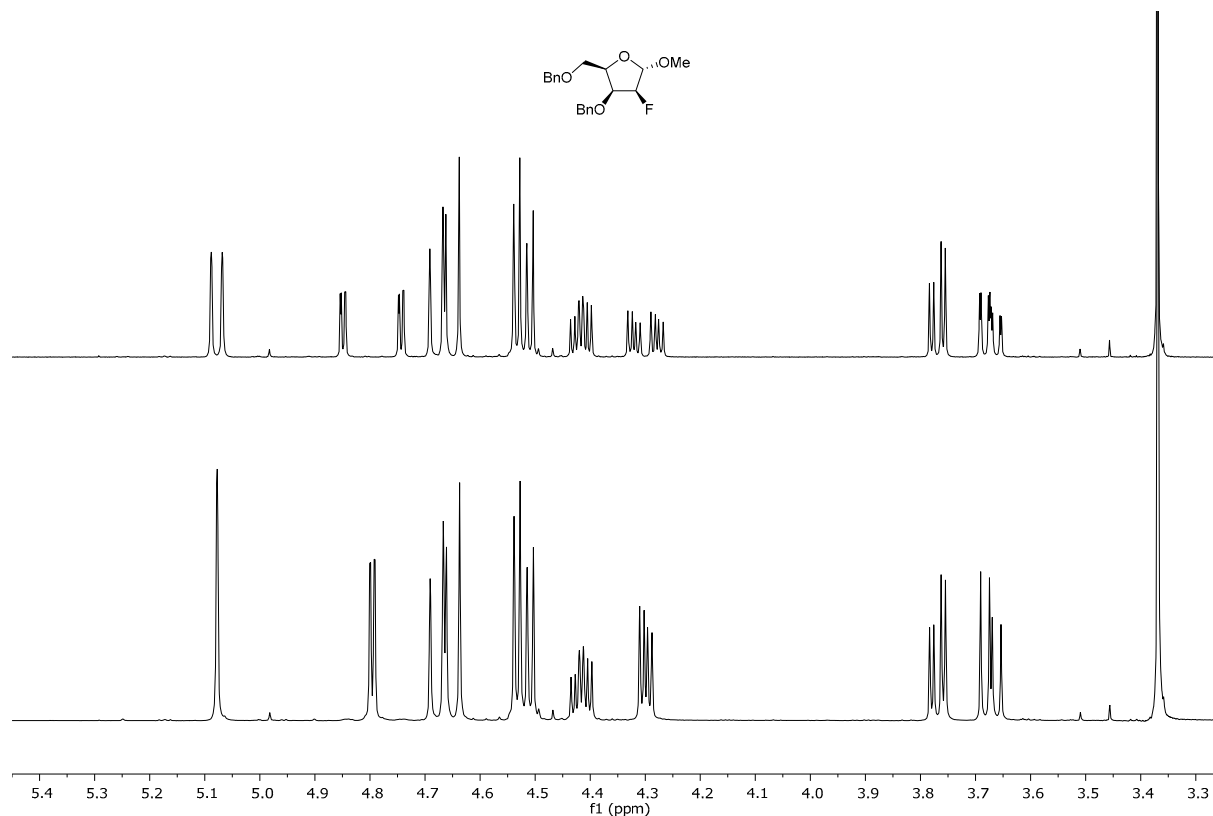



$^{13}\text{C}$ -APT NMR, 126 MHz,  $\text{CDCl}_3$  of compound **39**

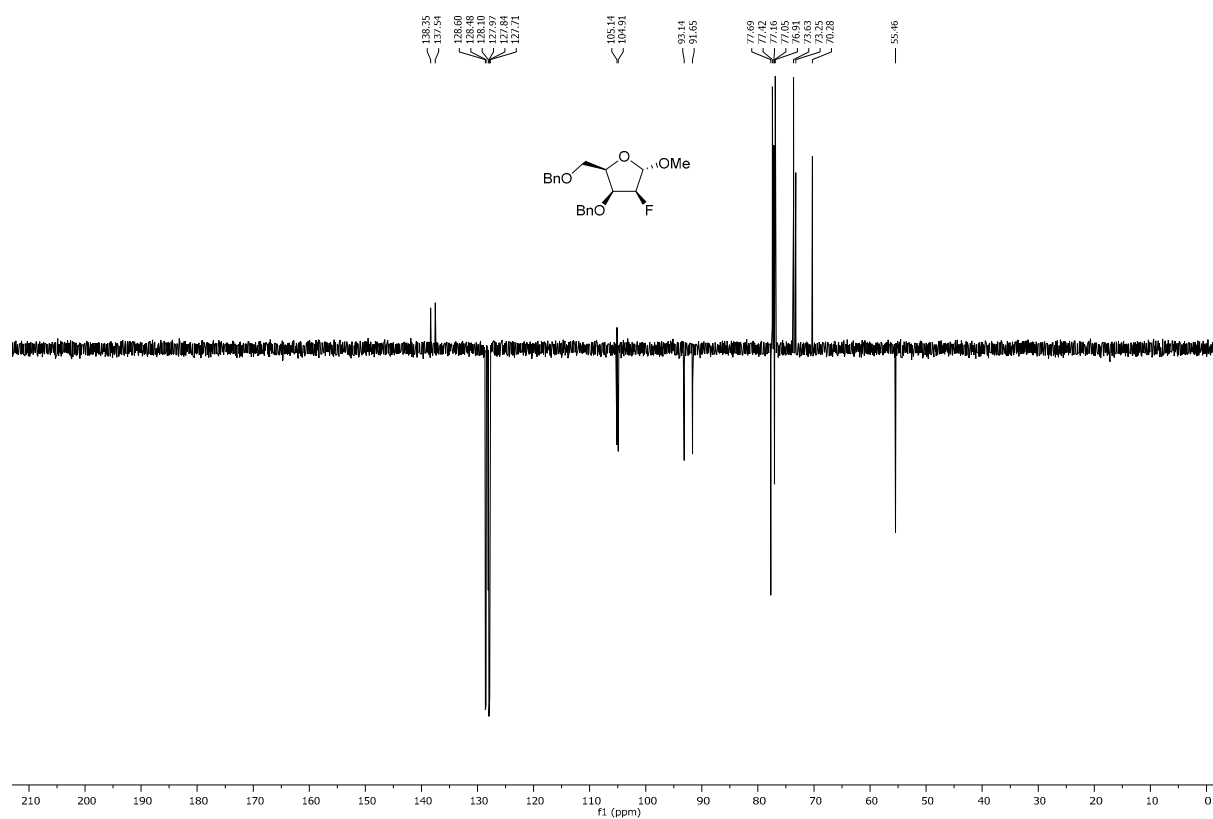

$^{19}\text{F}$  NMR, 471 MHz,  $\text{CDCl}_3$  of compound **35**

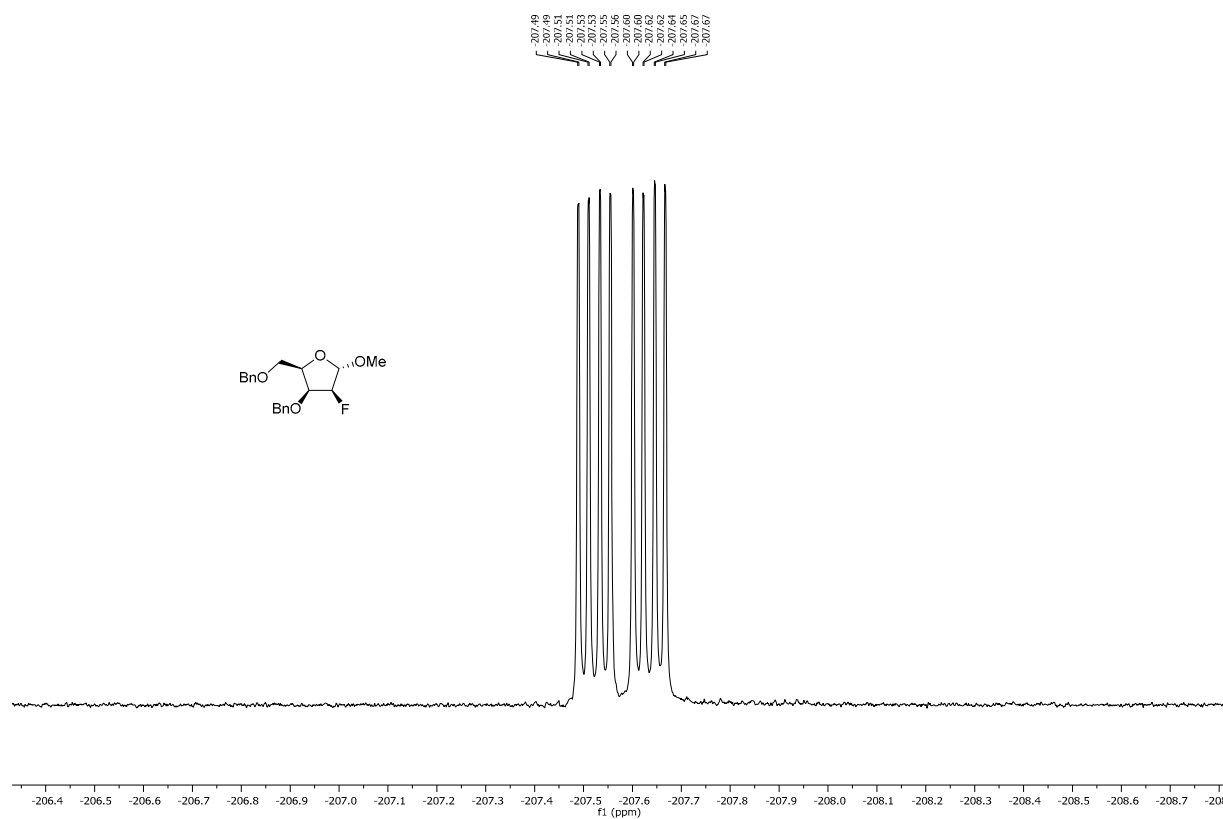

$^1\text{H}$ - $^1\text{H}$  COSY of compound **39**

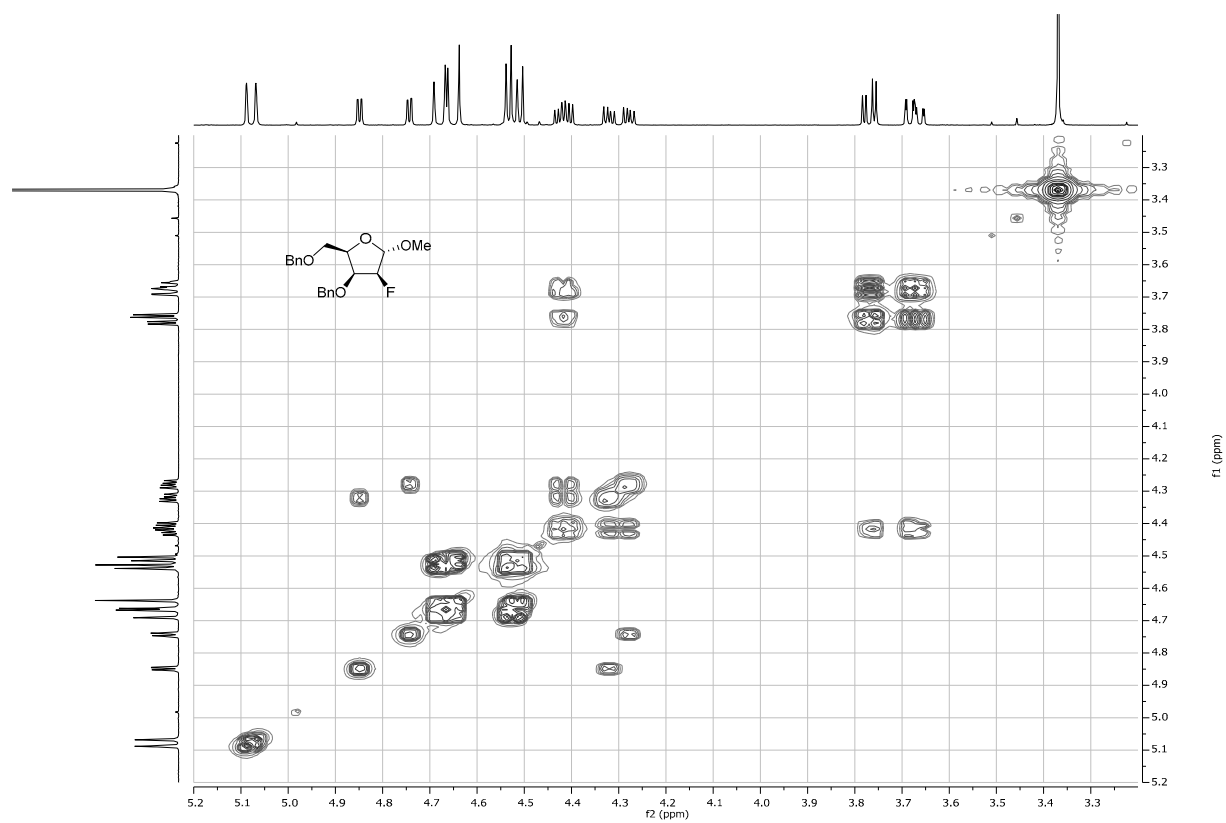

$^1\text{H}$ - $^{13}\text{C}$  HSQC of compound **39**

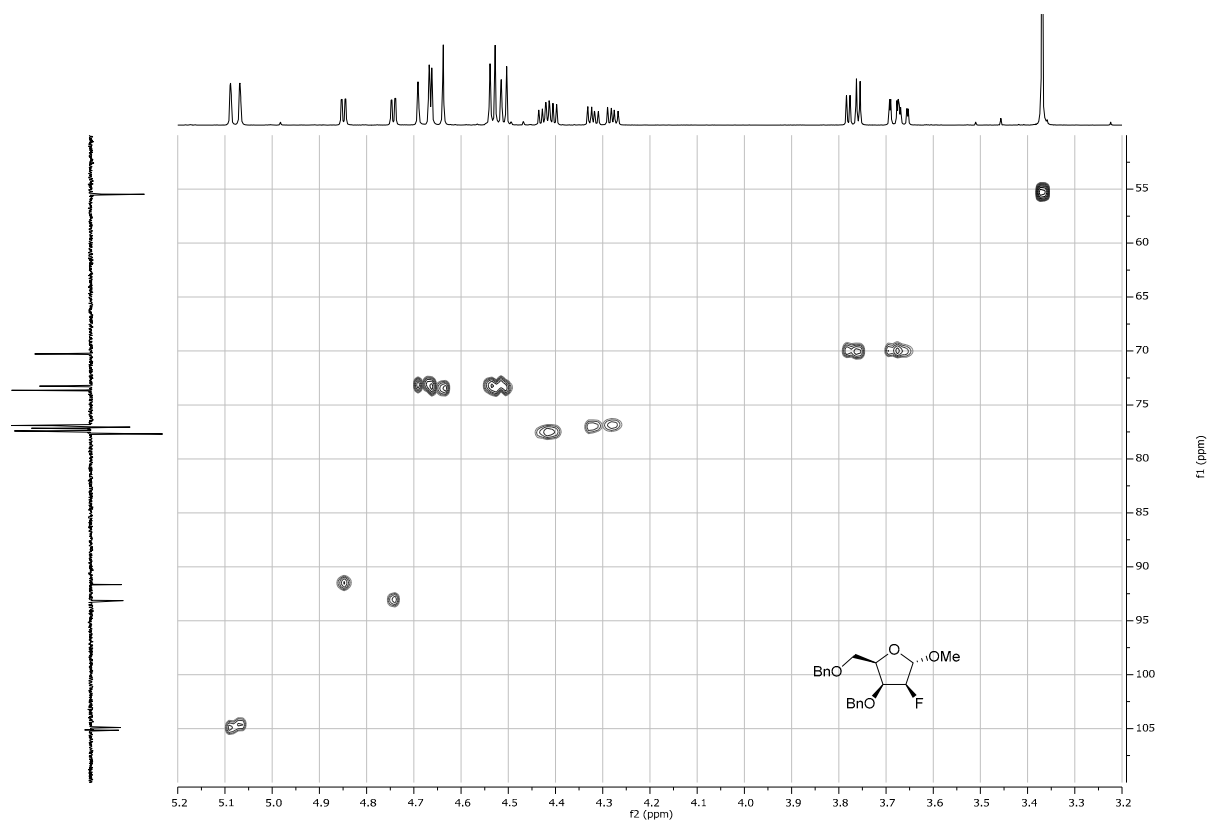

$^1\text{H}$ - $^1\text{H}$  NOESY of compound **39**

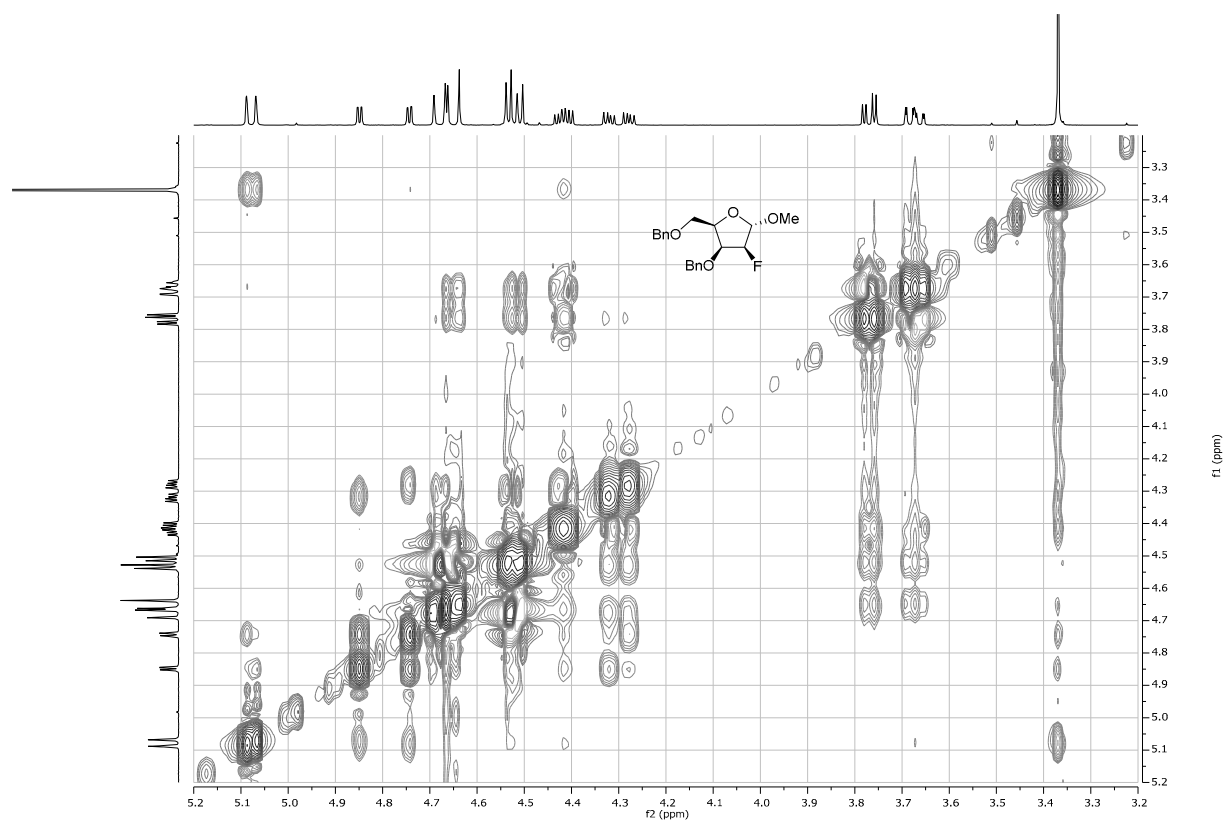

$^1\text{H}$ - $^{13}\text{C}$  HSQC-HECADE of compound **39**

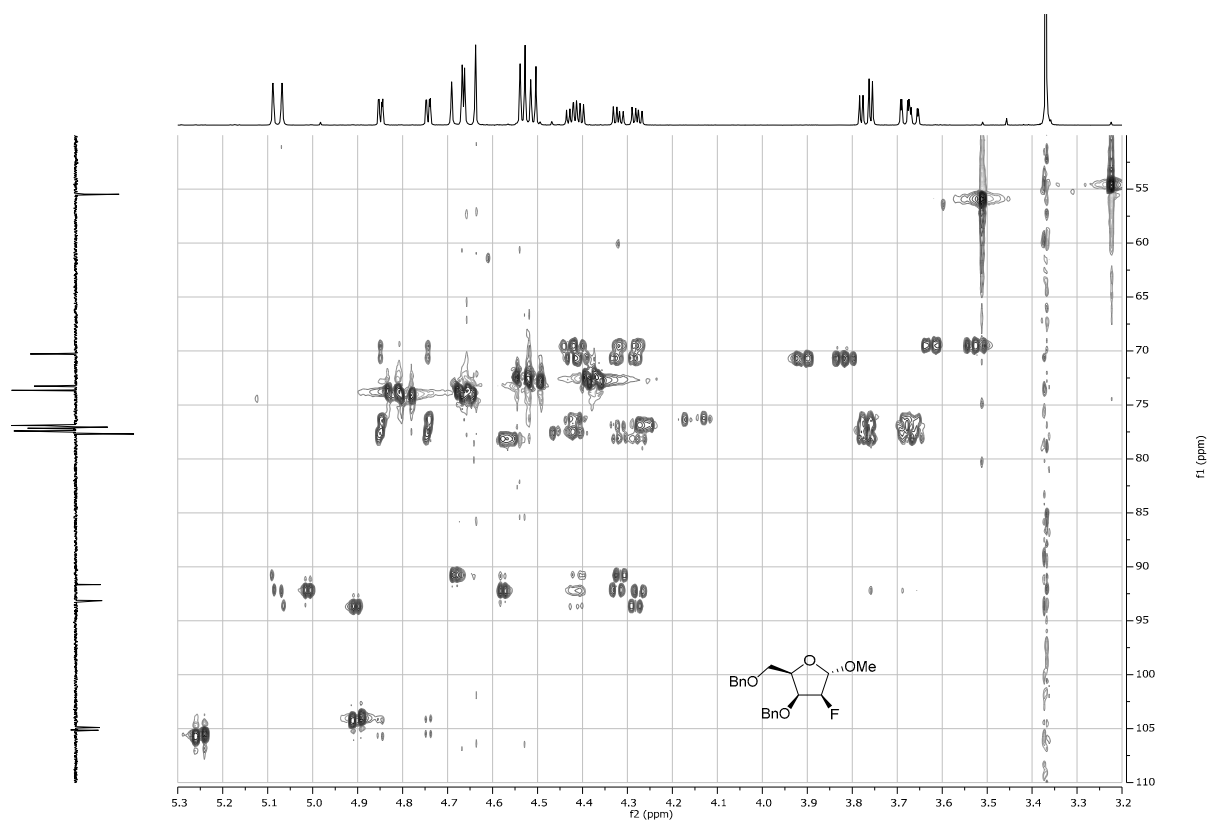

# Methyl 3,5-di-O-benzyl-2-deoxy-2-fluoro-β-D-xylofuranoside (40β)

<sup>1</sup>H NMR, 500 MHz, CDCl<sub>3</sub> of compound 40β

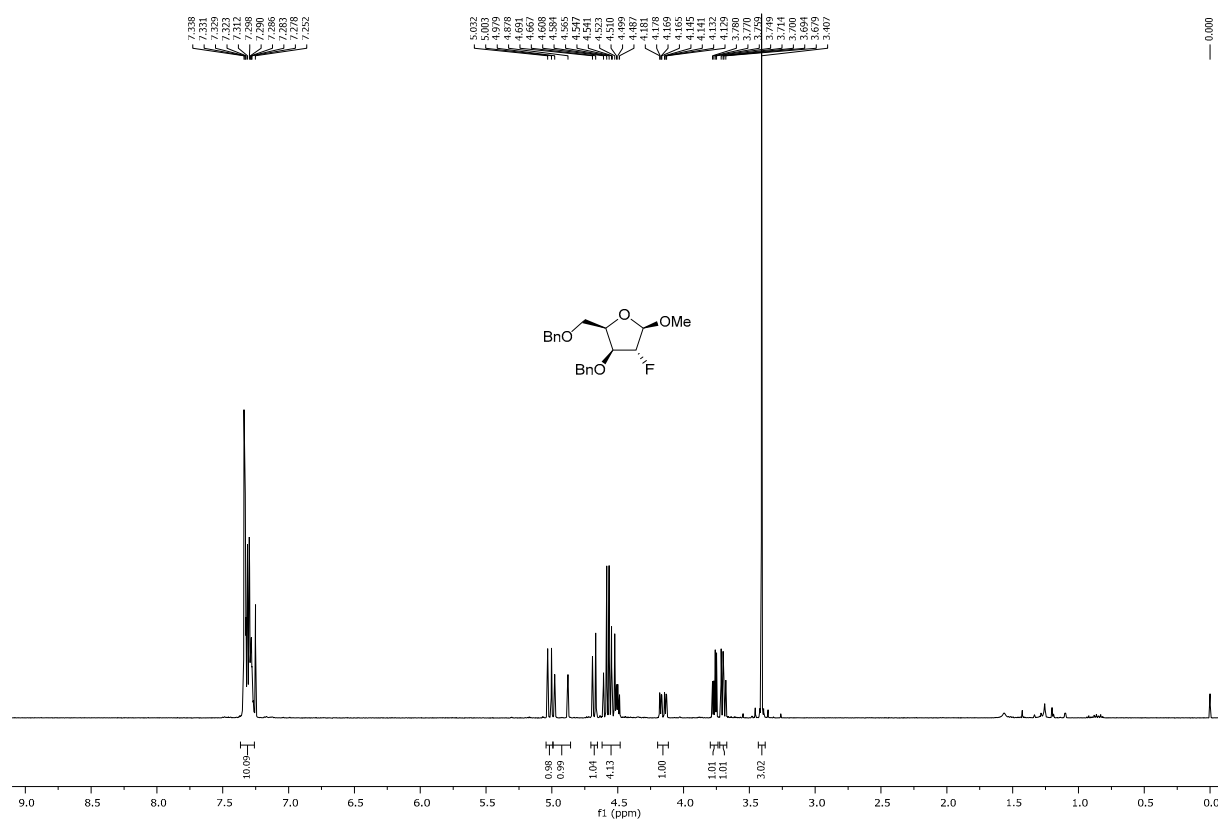

<sup>19</sup>F-decoupled <sup>1</sup>H NMR, (-190 ppm)

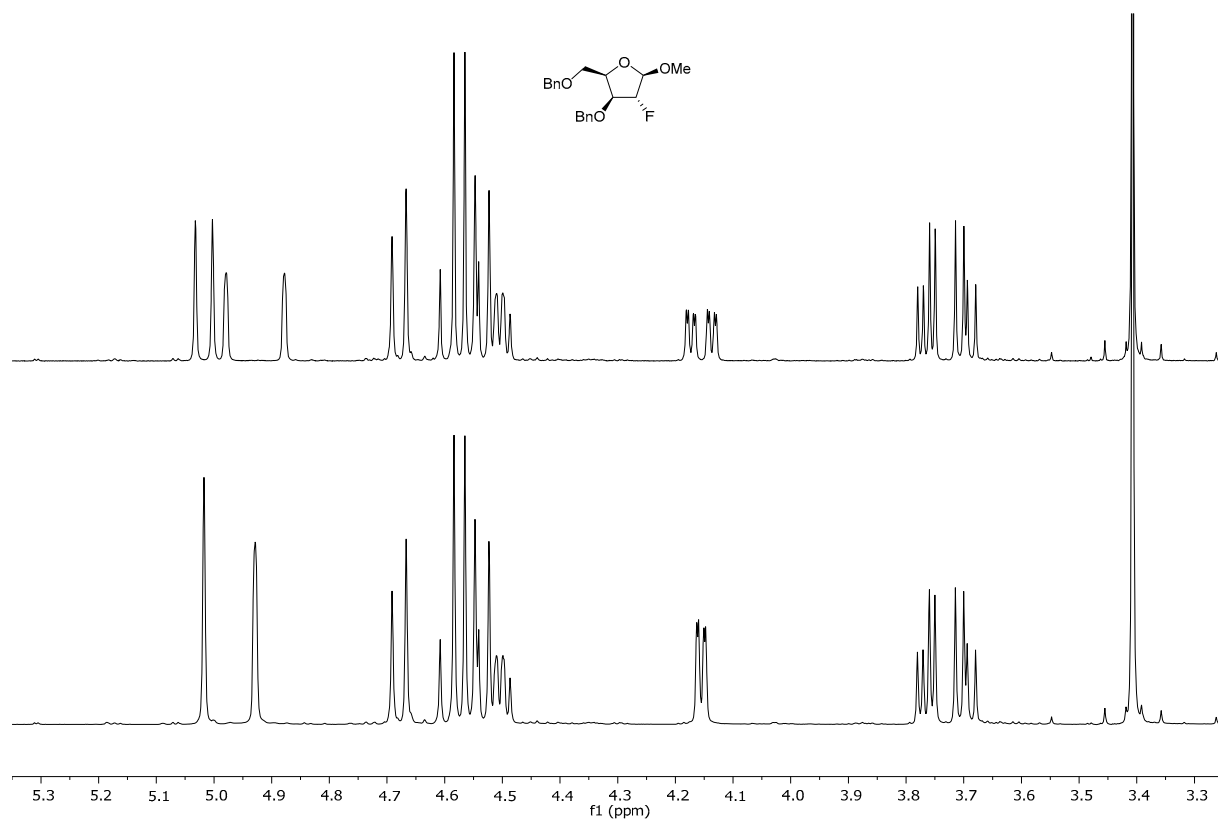

$^{13}\text{C}$ -APT NMR, 126 MHz,  $\text{CDCl}_3$  of compound **40 $\beta$**

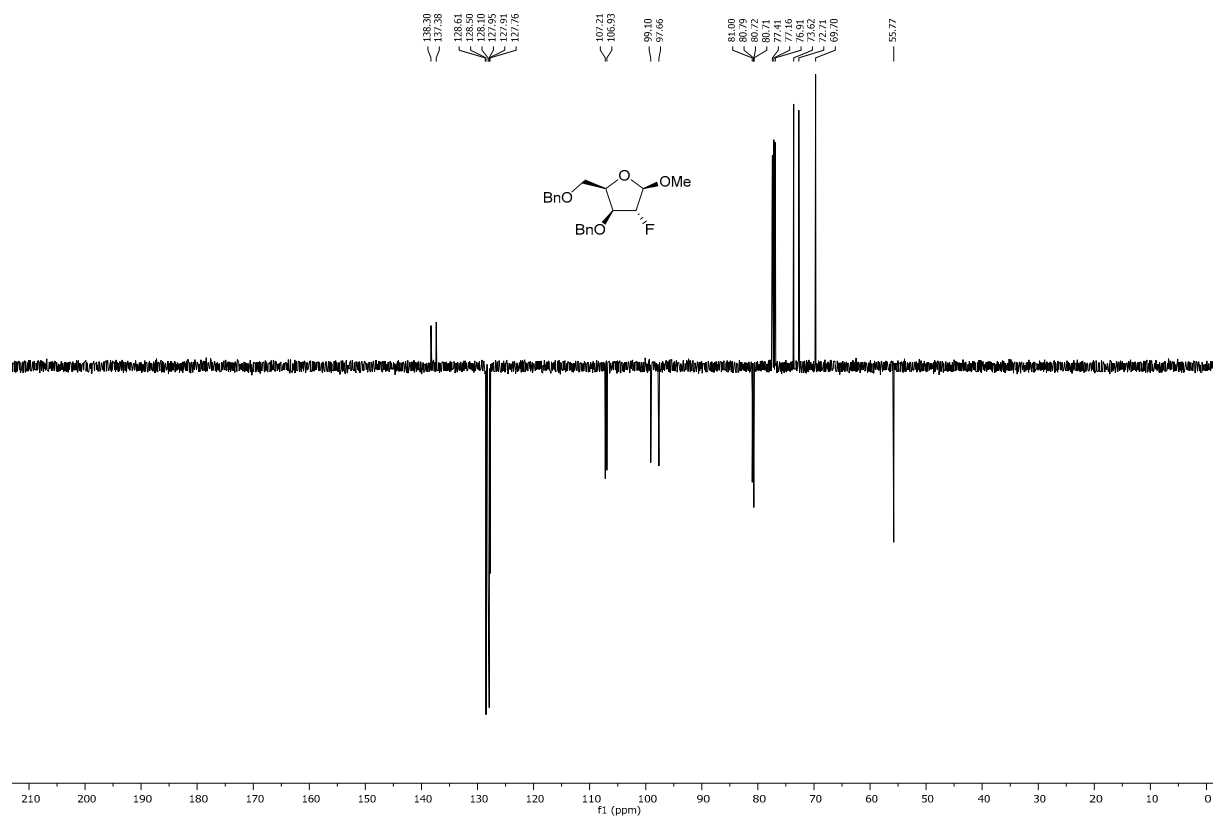

$^{19}\text{F}$  NMR, 471 MHz,  $\text{CDCl}_3$  of compound **40 $\beta$**

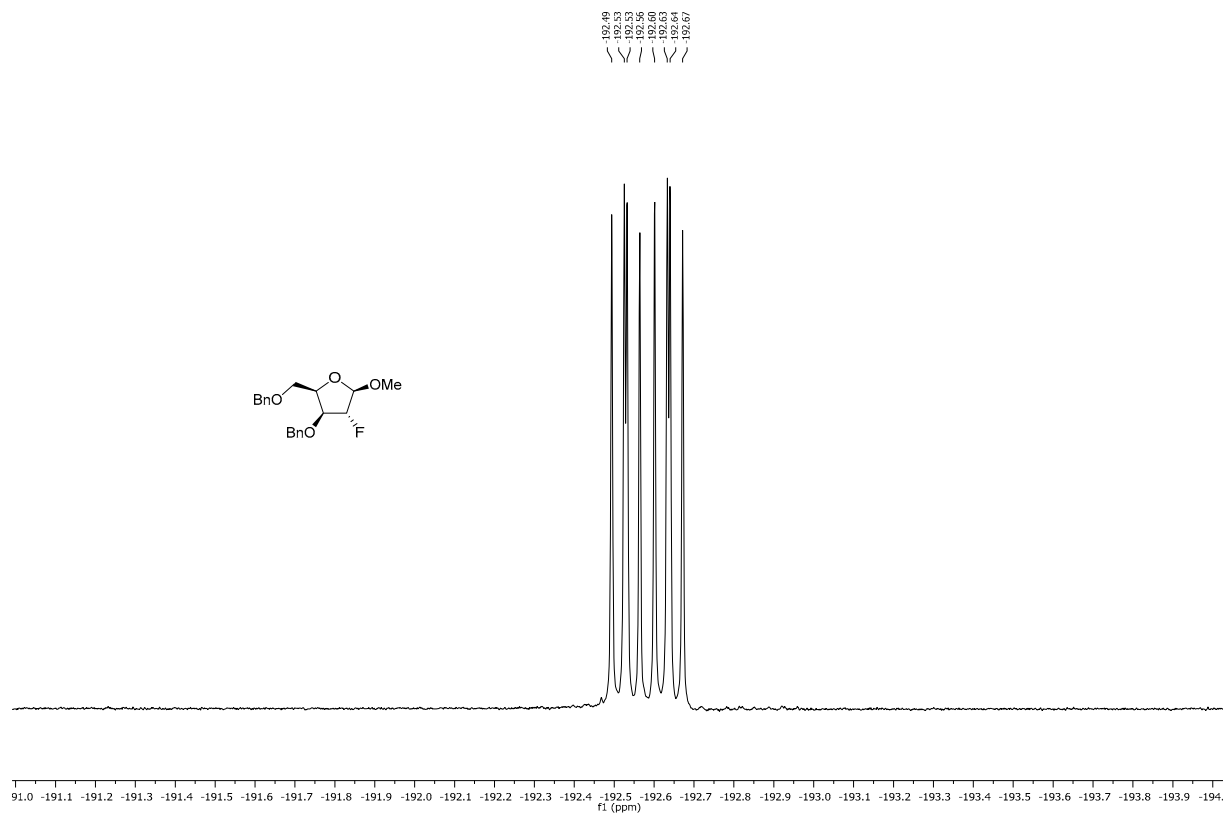

$^1\text{H}$ - $^1\text{H}$  COSY of compound **40 $\beta$**

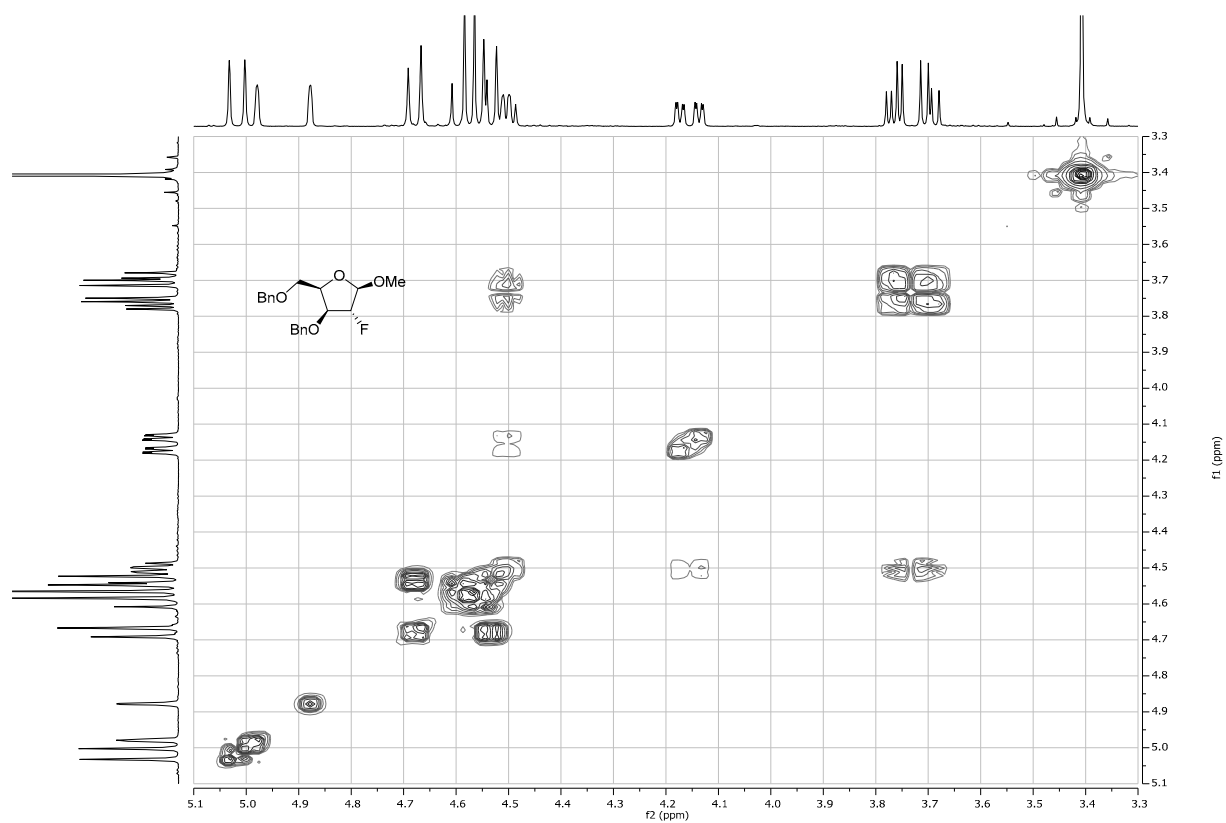

$^1\text{H}$ - $^{13}\text{C}$  HSQC of compound **40 $\beta$**

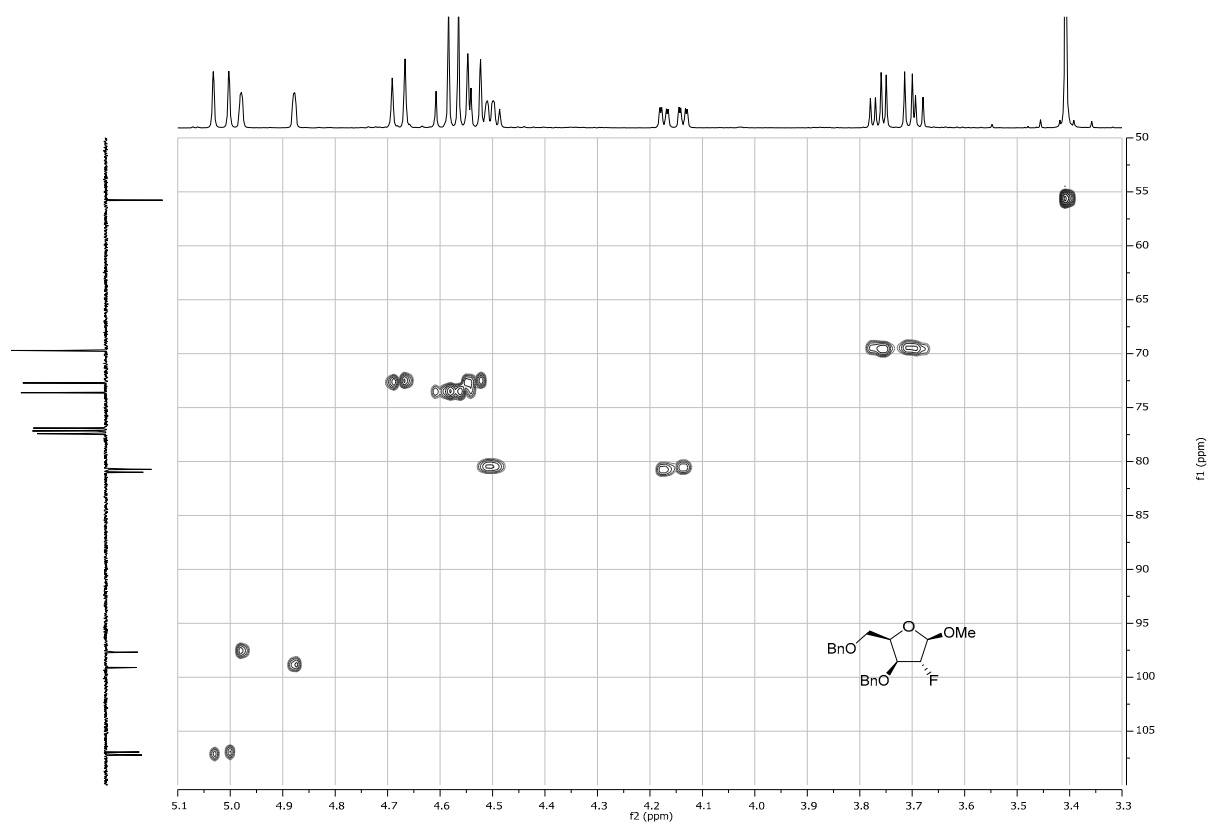

$^1\text{H}$ - $^1\text{H}$  NOESY of compound **40 $\beta$**

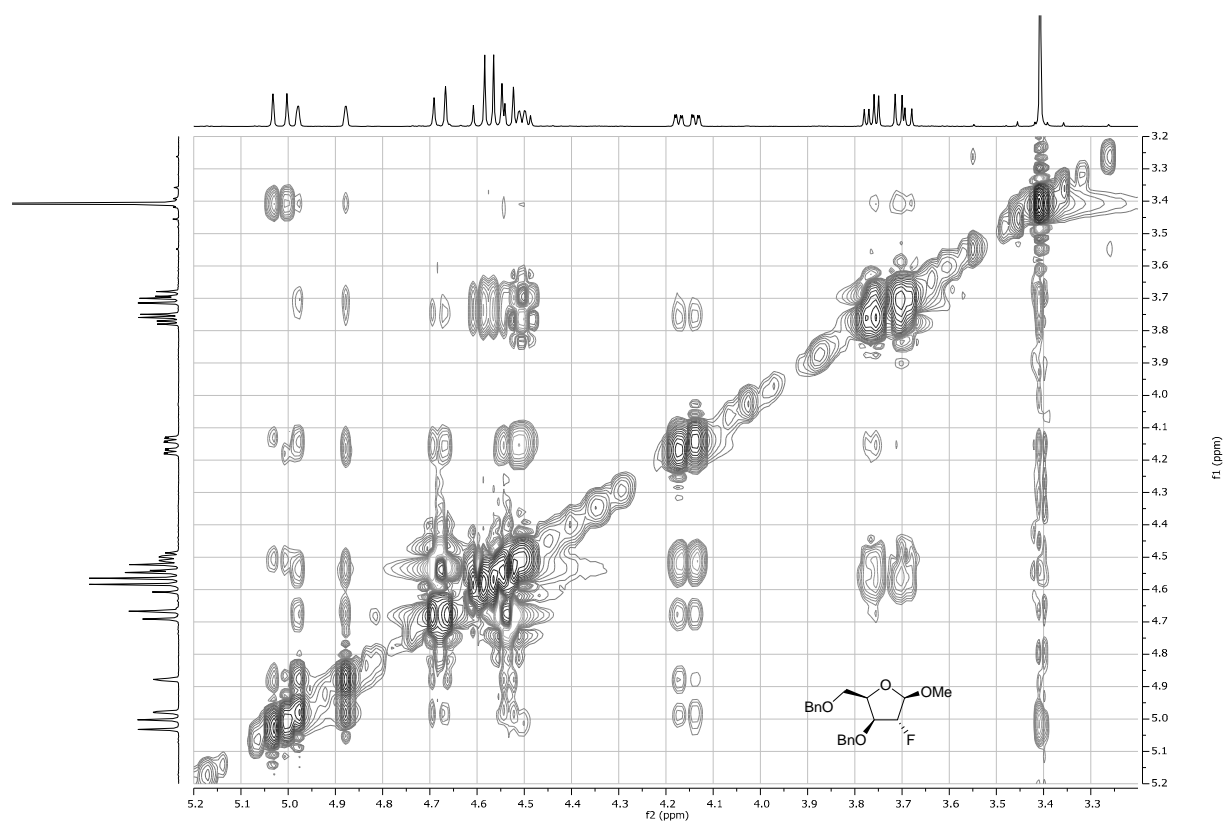

$^1\text{H}$ - $^{13}\text{C}$  HSQC-HECADE of compound **40 $\beta$**

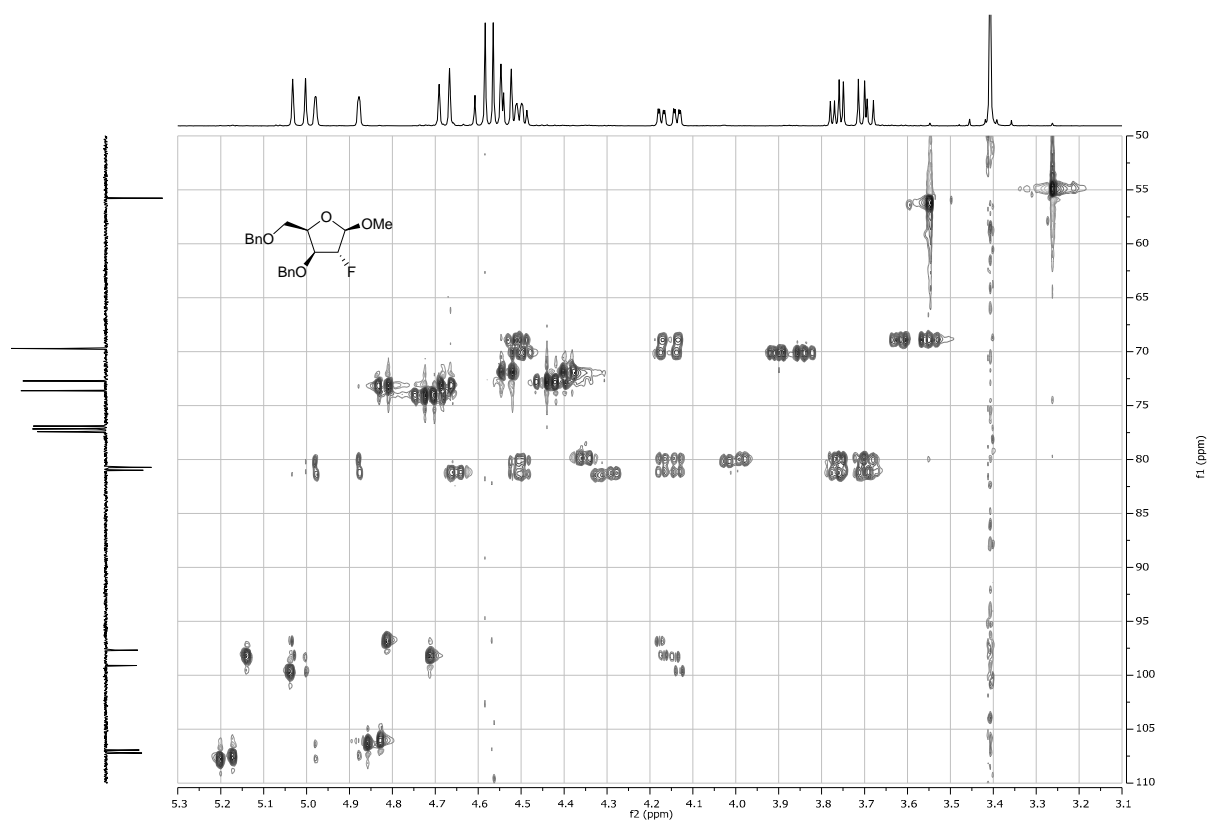

# 2-azido-3,5-di-O-benzyl-2-deoxy- $\alpha/\beta$ -D-ribofuranose (41)

$^1\text{H}$  NMR, 400 MHz,  $\text{CDCl}_3$  of compound 41

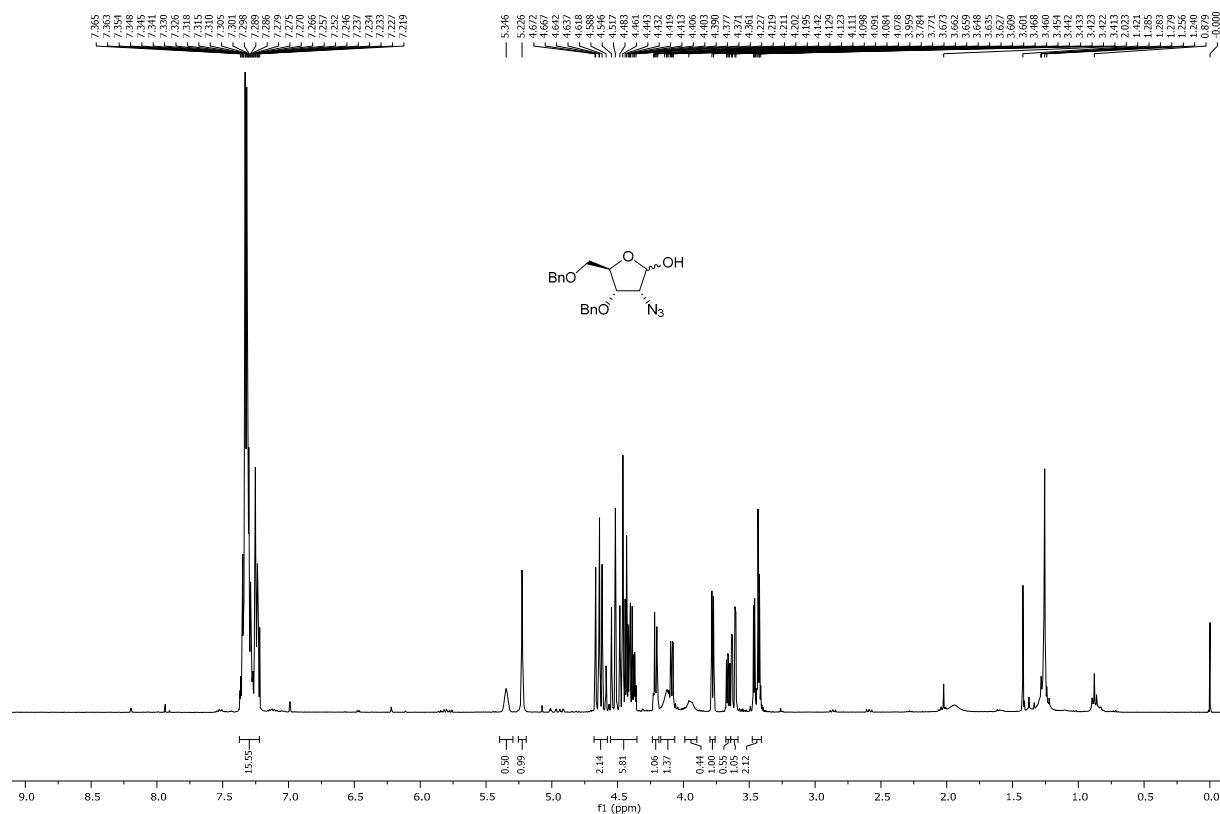

$^{13}\text{C}$ -APT NMR, 101 MHz,  $\text{CDCl}_3$  of compound 41

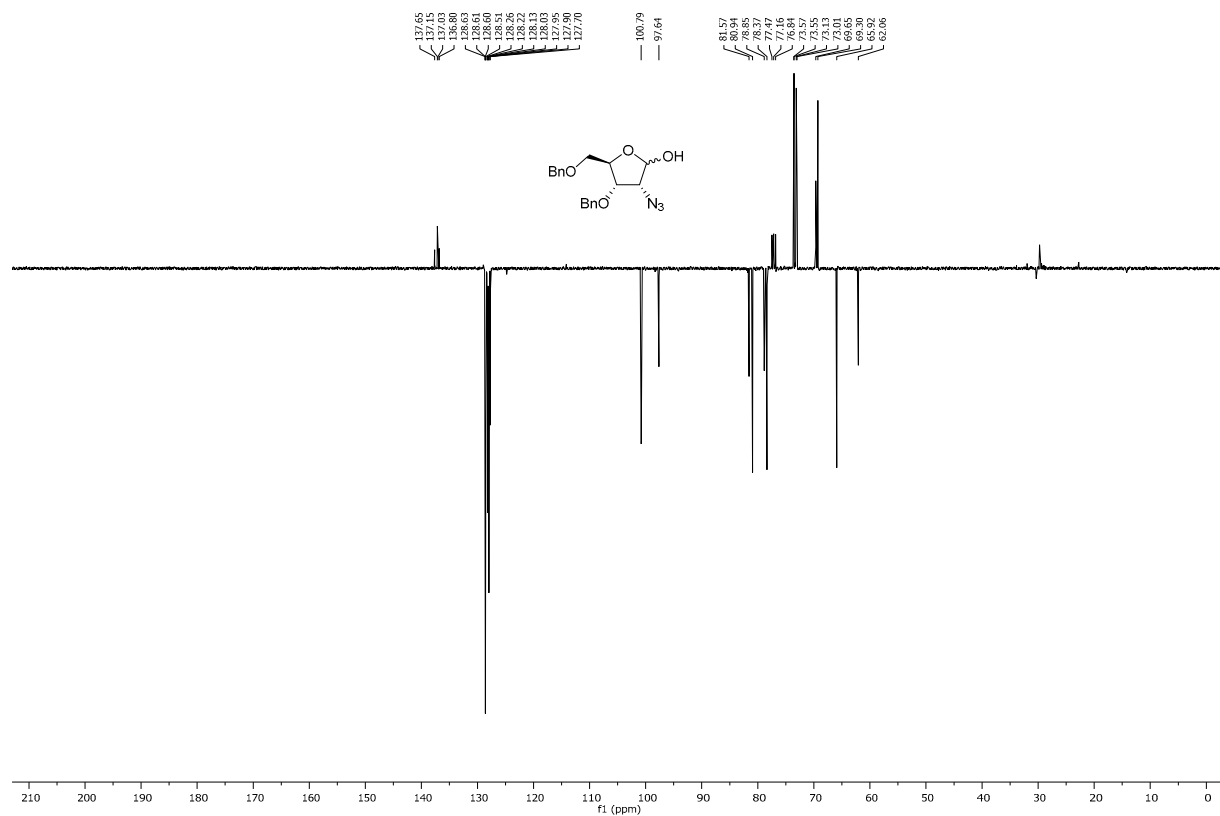



$^1\text{H}$ - $^1\text{H}$  COSY of compound **41**

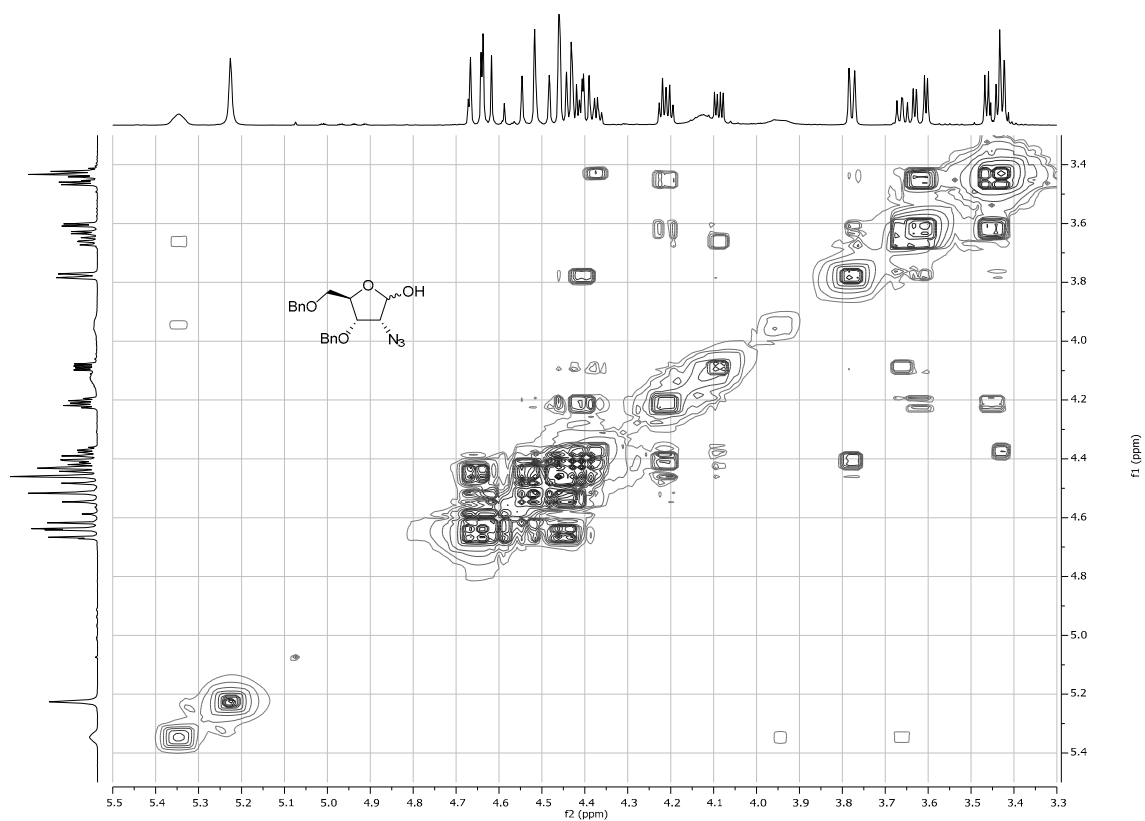

$^1\text{H}$ - $^{13}\text{C}$  HSQC of compound **41**

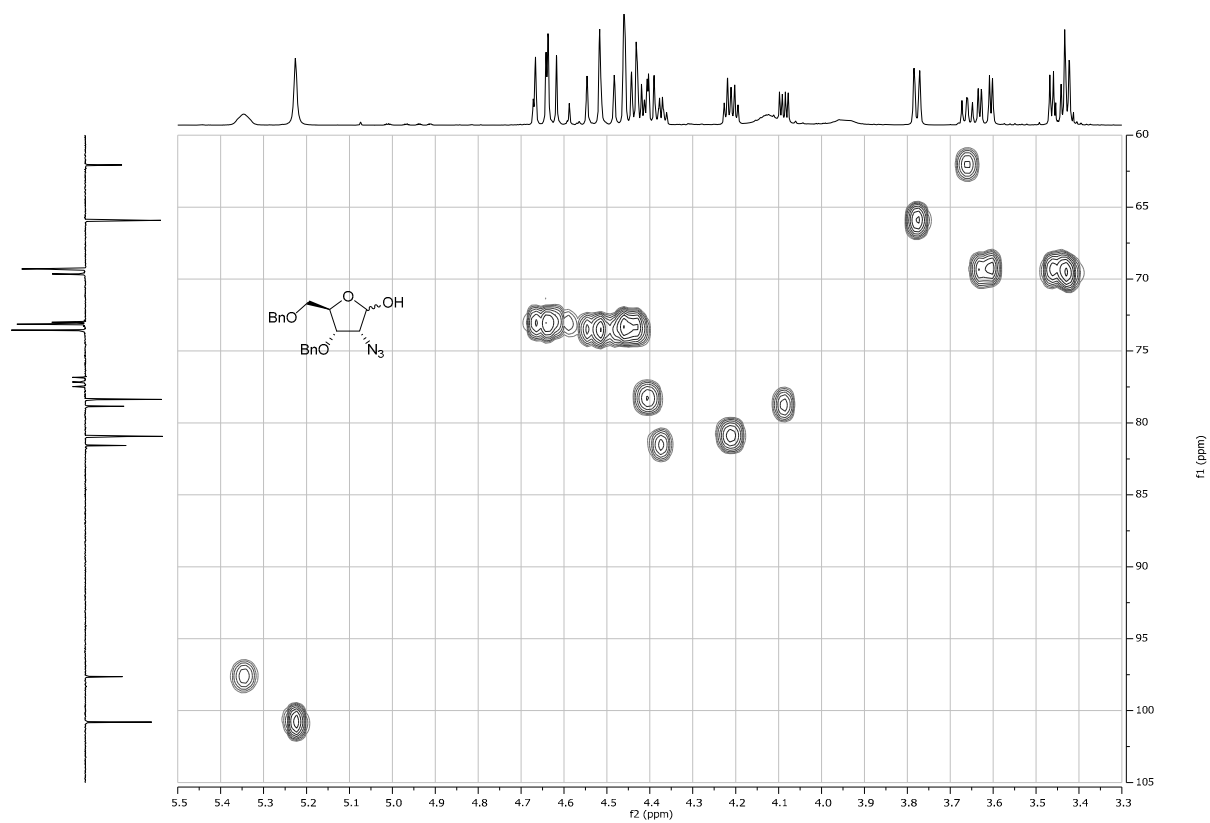

$^1\text{H}$ - $^{13}\text{C}$  HSQC-HECADE of compound **41**

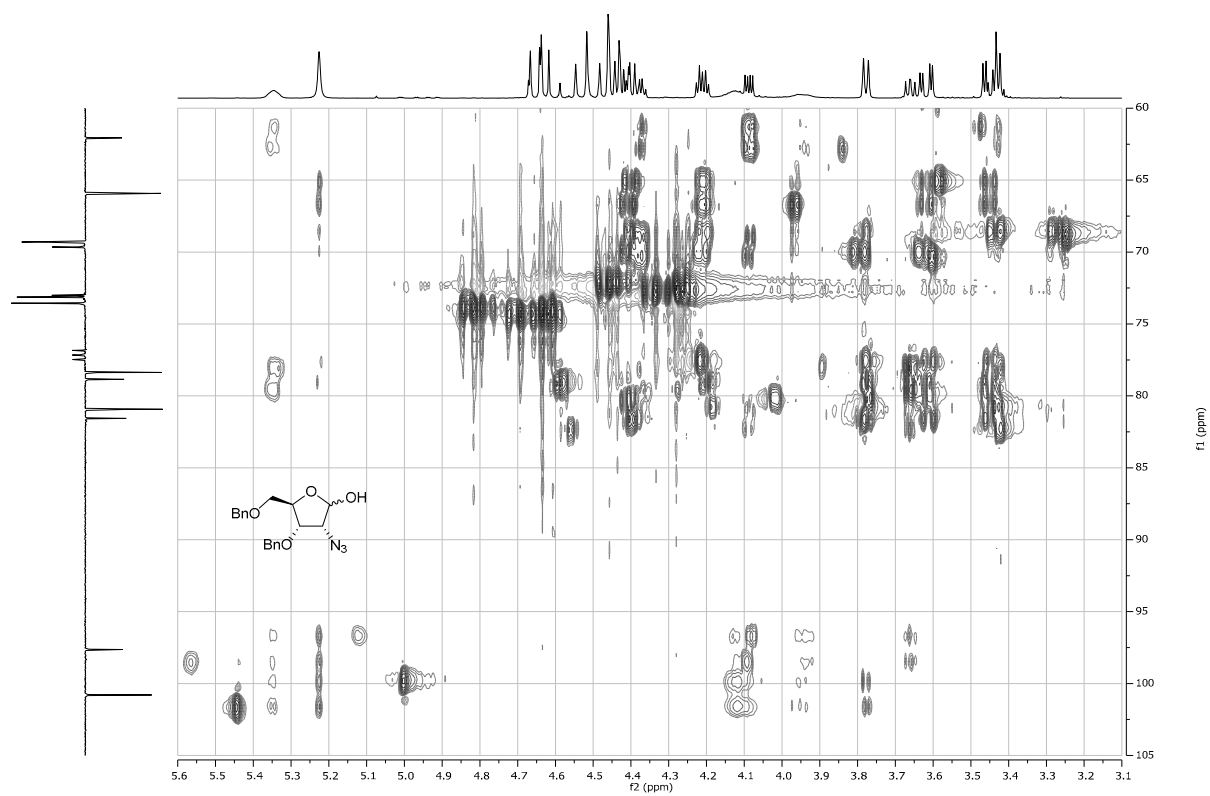

2-azido-3,5-di-O-benzyl-2-deoxy- $\alpha/\beta$ -D-arabinofuranose (**42**)

$^1\text{H}$  NMR, 400 MHz,  $\text{CDCl}_3$  of compound **42**

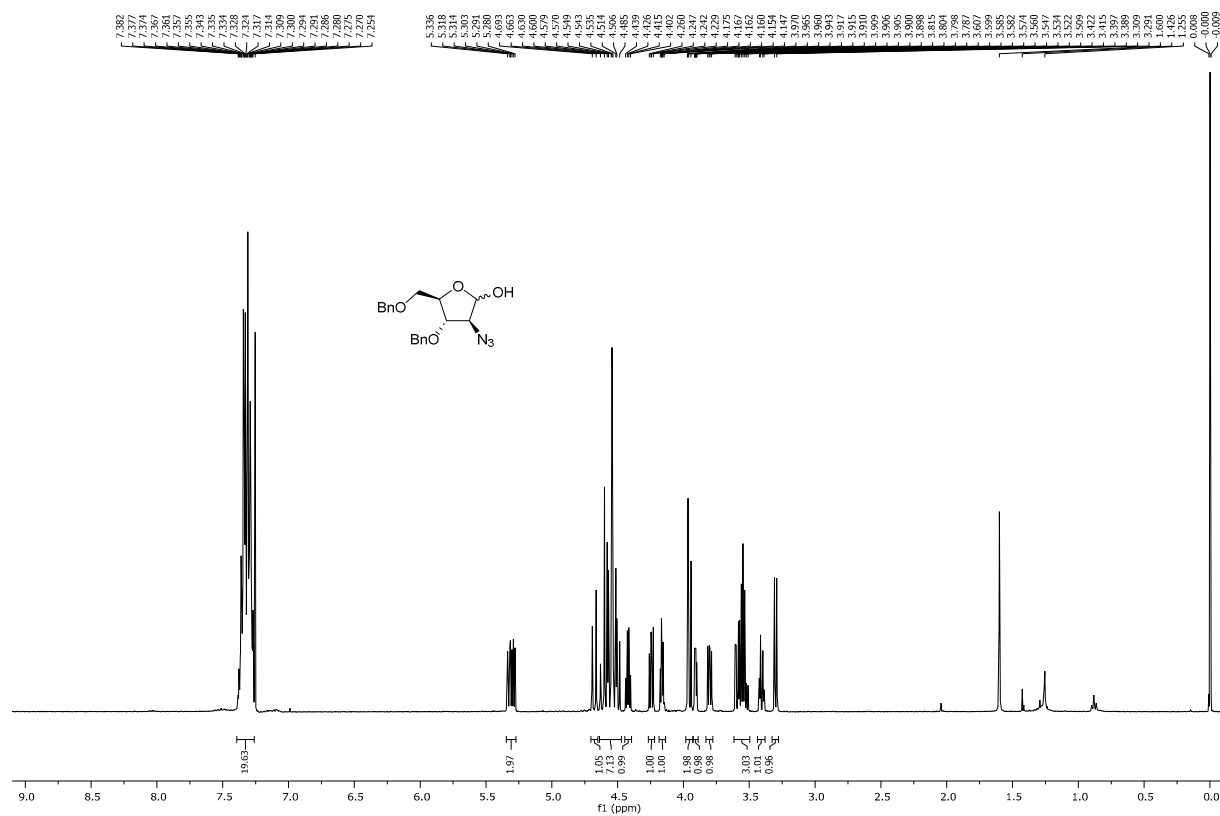

$^{13}\text{C}$ -APT NMR, 101 MHz,  $\text{CDCl}_3$  of compound **42**

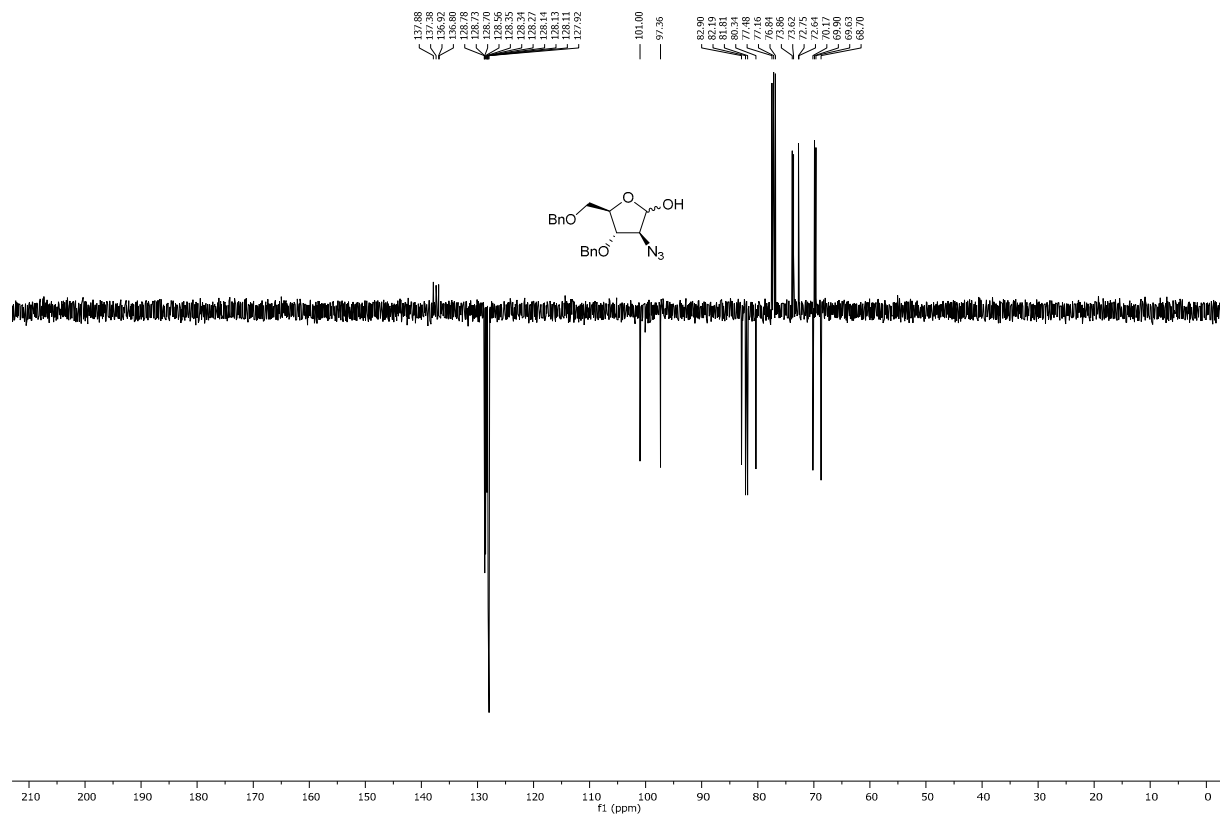

$^1\text{H}$ - $^1\text{H}$  COSY of compound **42**

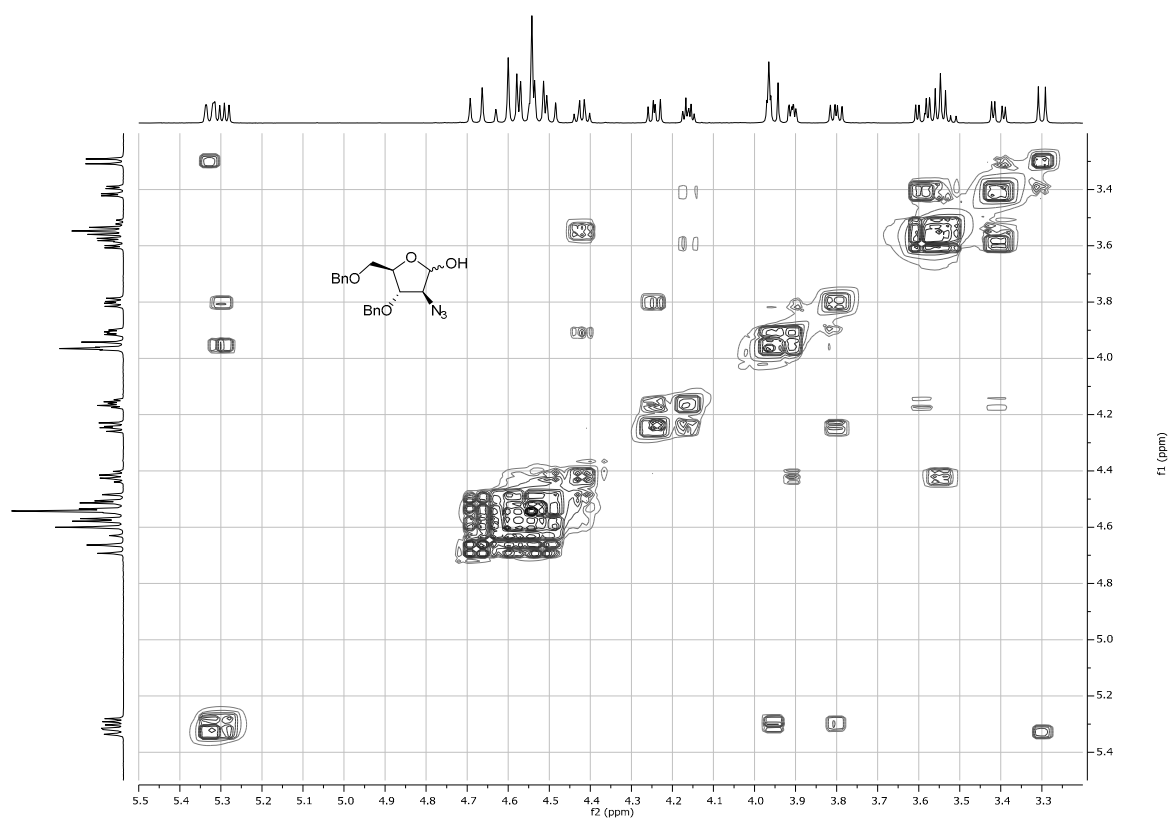

$^1\text{H}$ - $^{13}\text{C}$  HSQC of compound **42**

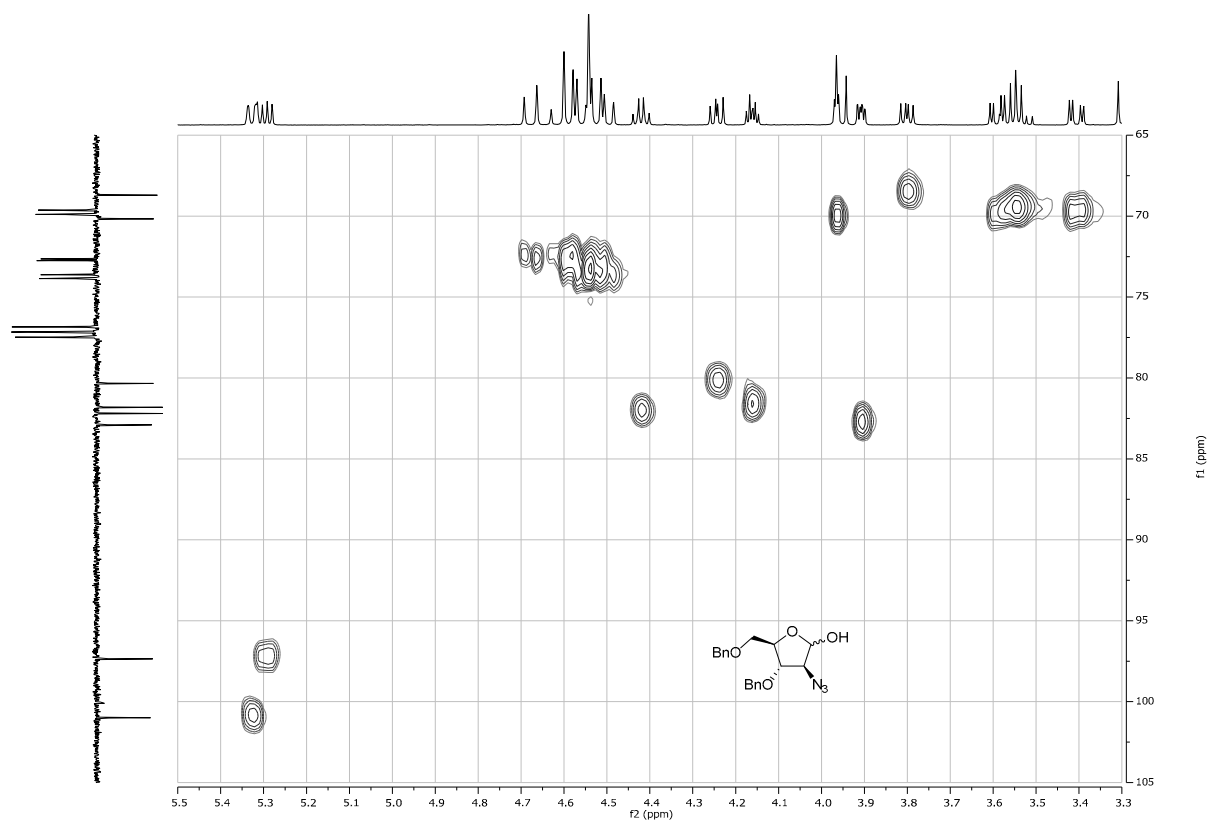

$^1\text{H}$ - $^{13}\text{C}$  HSQC-HECADE of compound **42**

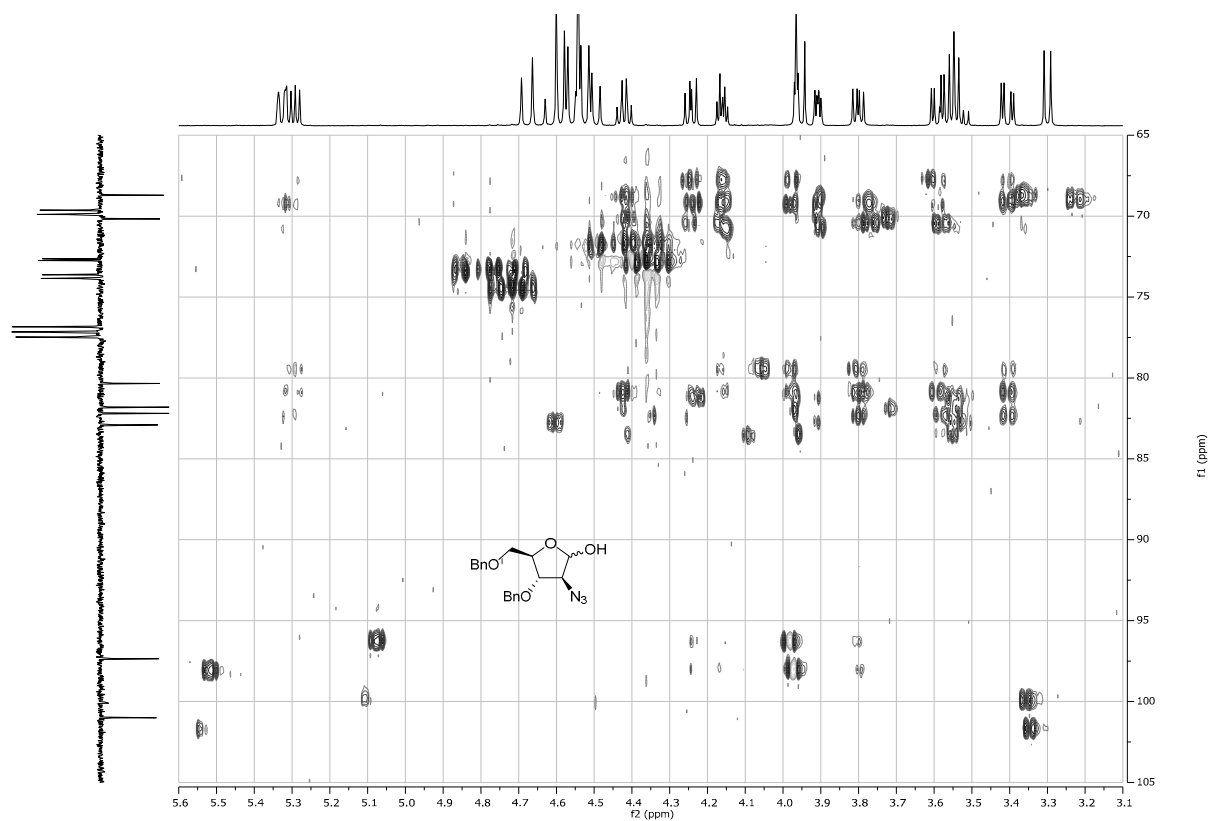

2-azido-3,5-di-O-benzyl-2-deoxy- $\alpha/\beta$ -D-lyxofuranose (**43**)

$^1\text{H}$  NMR, 400 MHz,  $\text{CDCl}_3$  of compound **43**

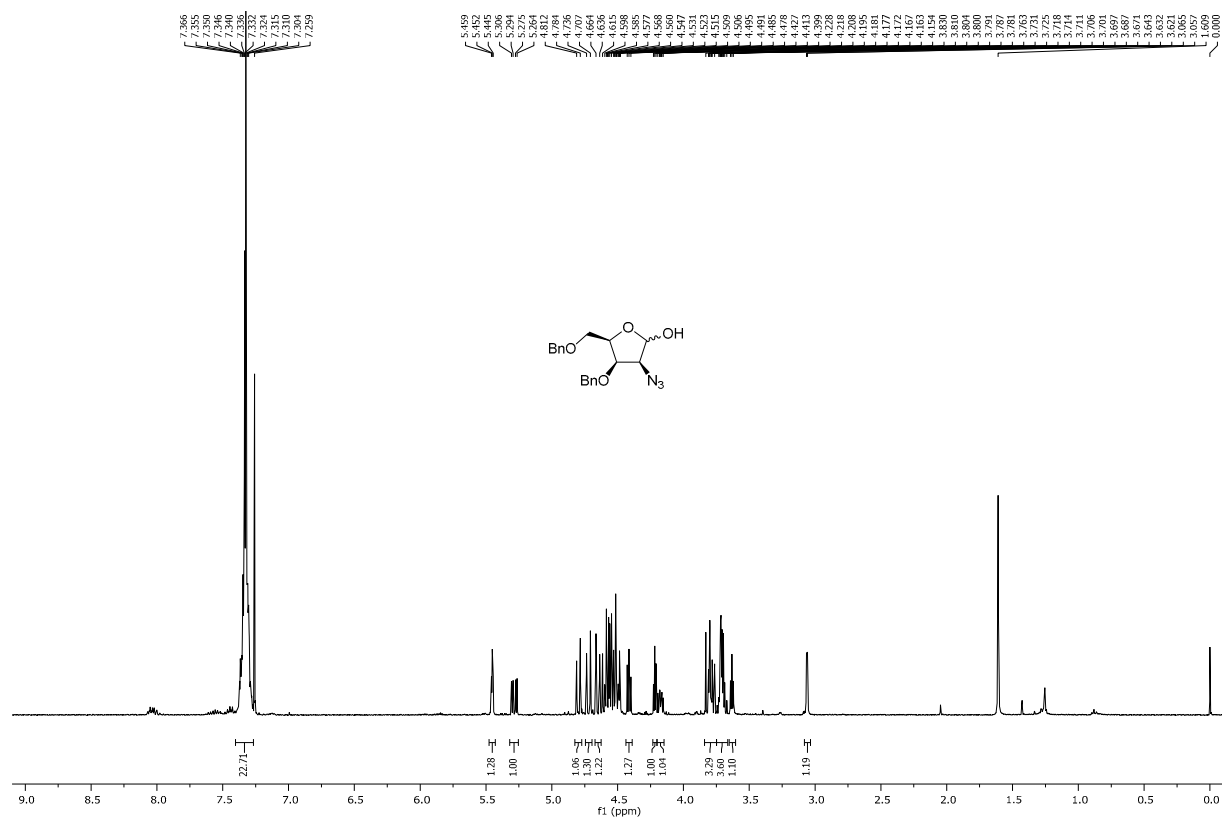

$^{13}\text{C}$ -APT NMR, 101 MHz,  $\text{CDCl}_3$  of compound **43**

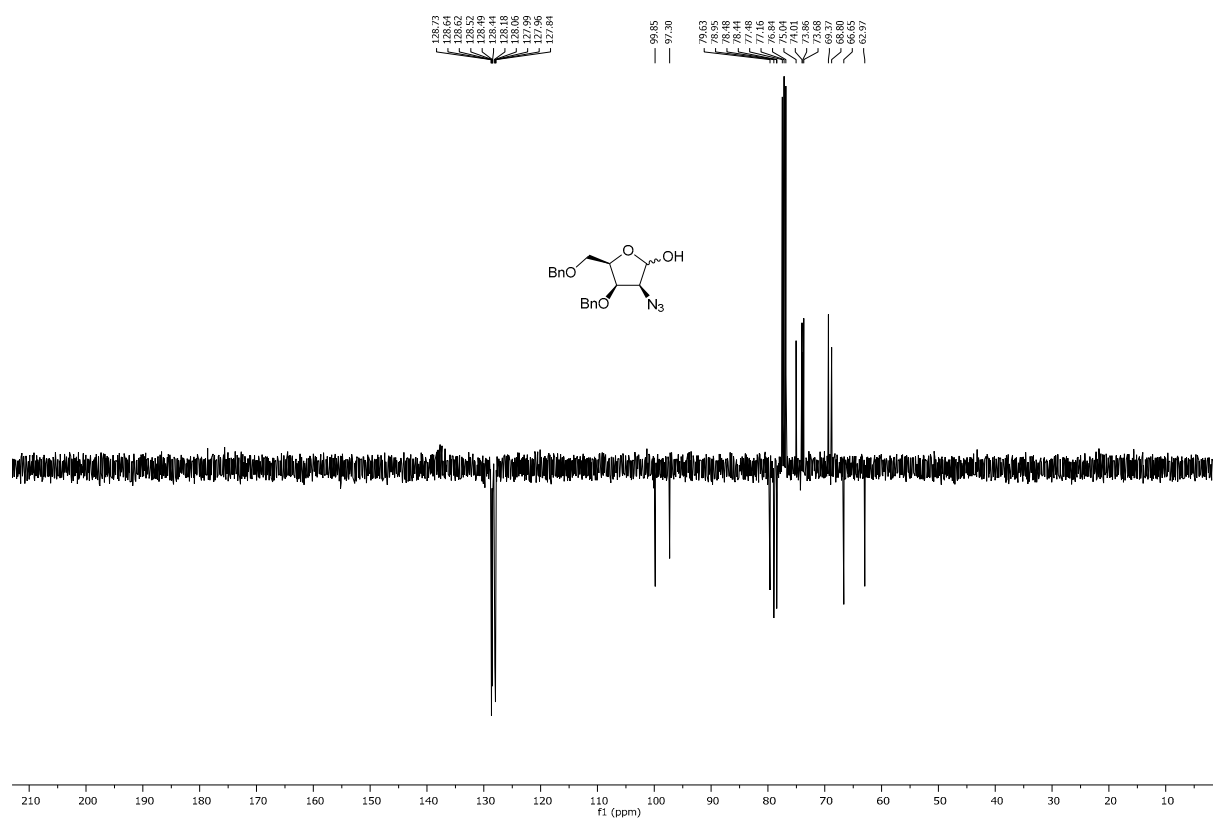

$^1\text{H}$ - $^1\text{H}$  COSY of compound **43**

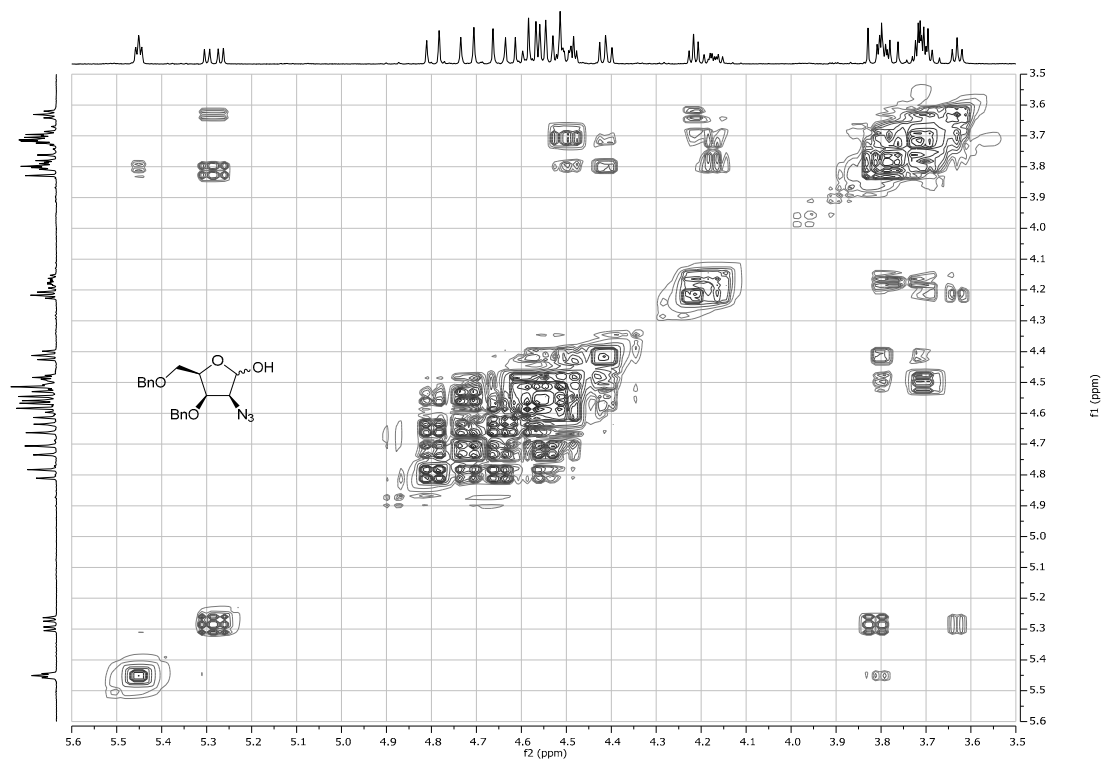

$^1\text{H}$ - $^{13}\text{C}$  HSQC of compound **43**

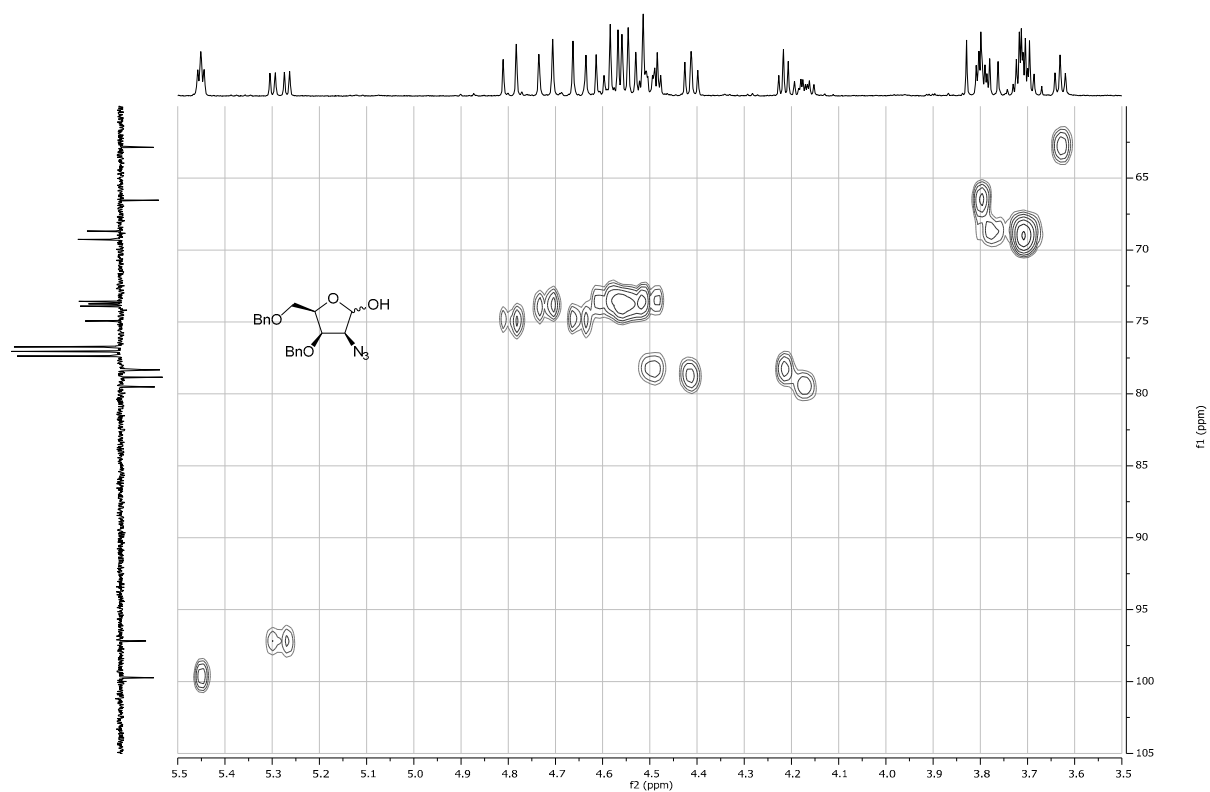

$^1\text{H}$ - $^{13}\text{C}$  HSQC-HECADE of compound **43**

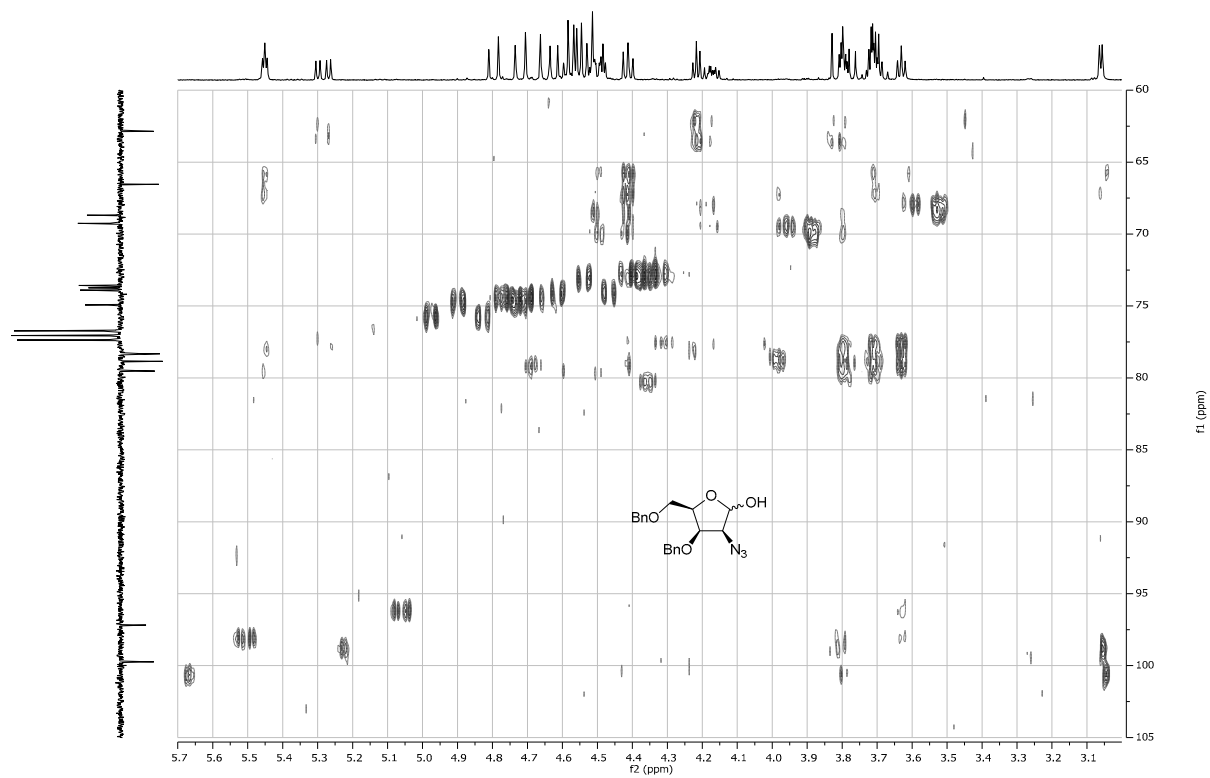

2-azido-3,5-di-O-benzyl-2-deoxy- $\alpha/\beta$ -D-xylofuranose (**44**)

$^1\text{H}$  NMR, 400 MHz,  $\text{CDCl}_3$  of compound **44**

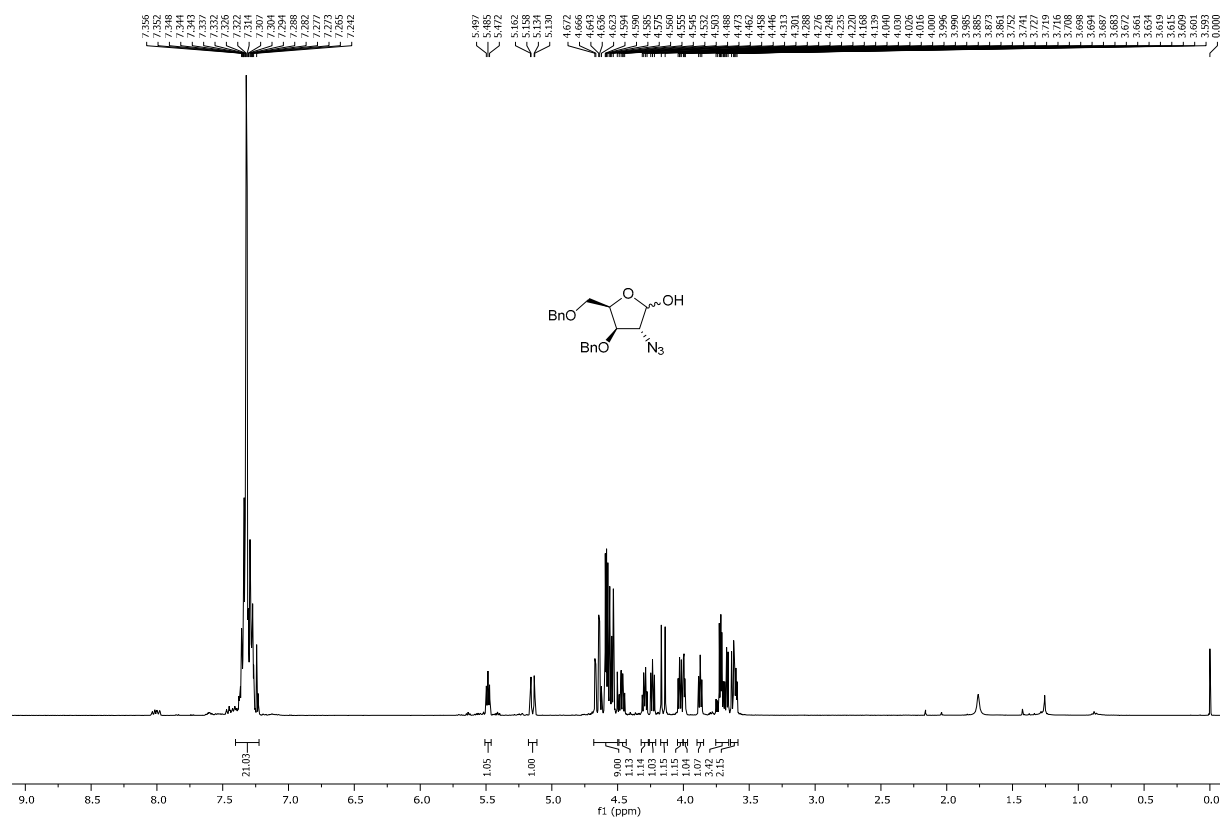

$^{13}\text{C}$ -APT NMR, 101 MHz,  $\text{CDCl}_3$  of compound **44**

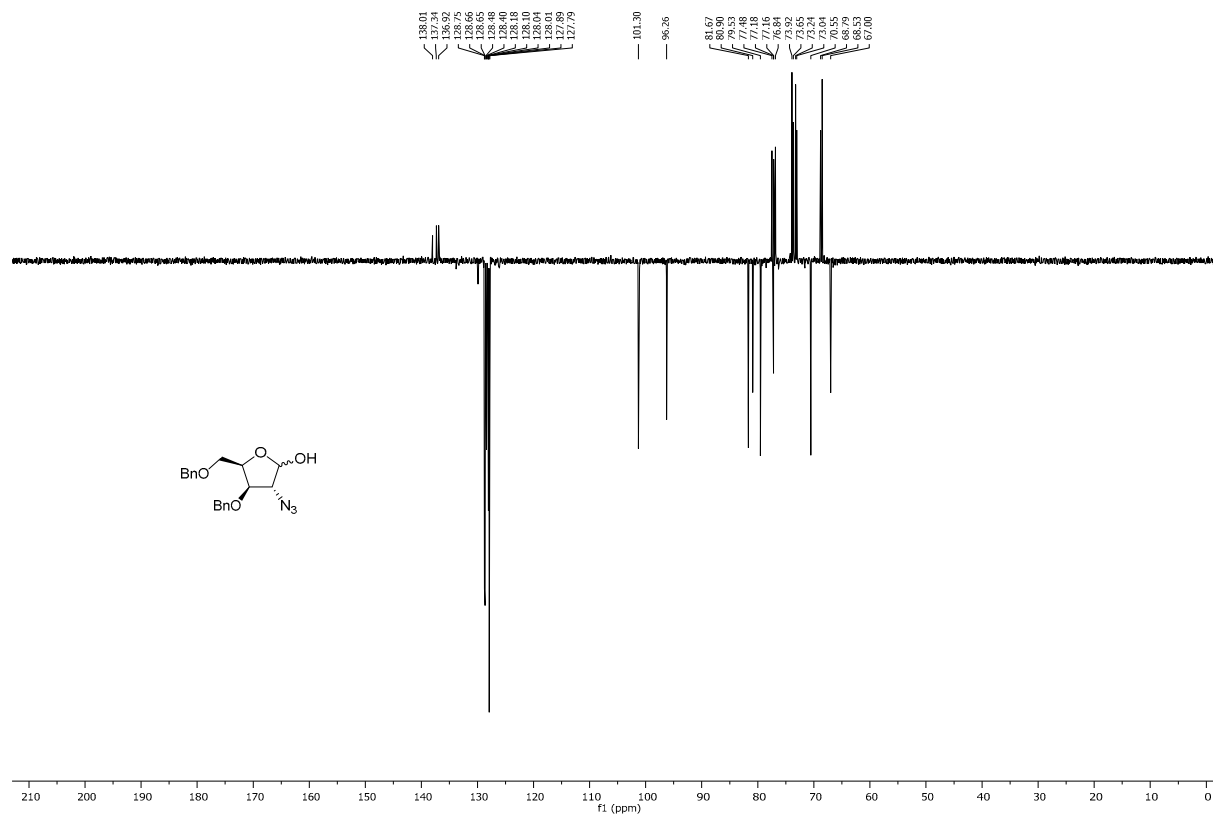



$^1\text{H}$ - $^1\text{H}$  COSY of compound **44**

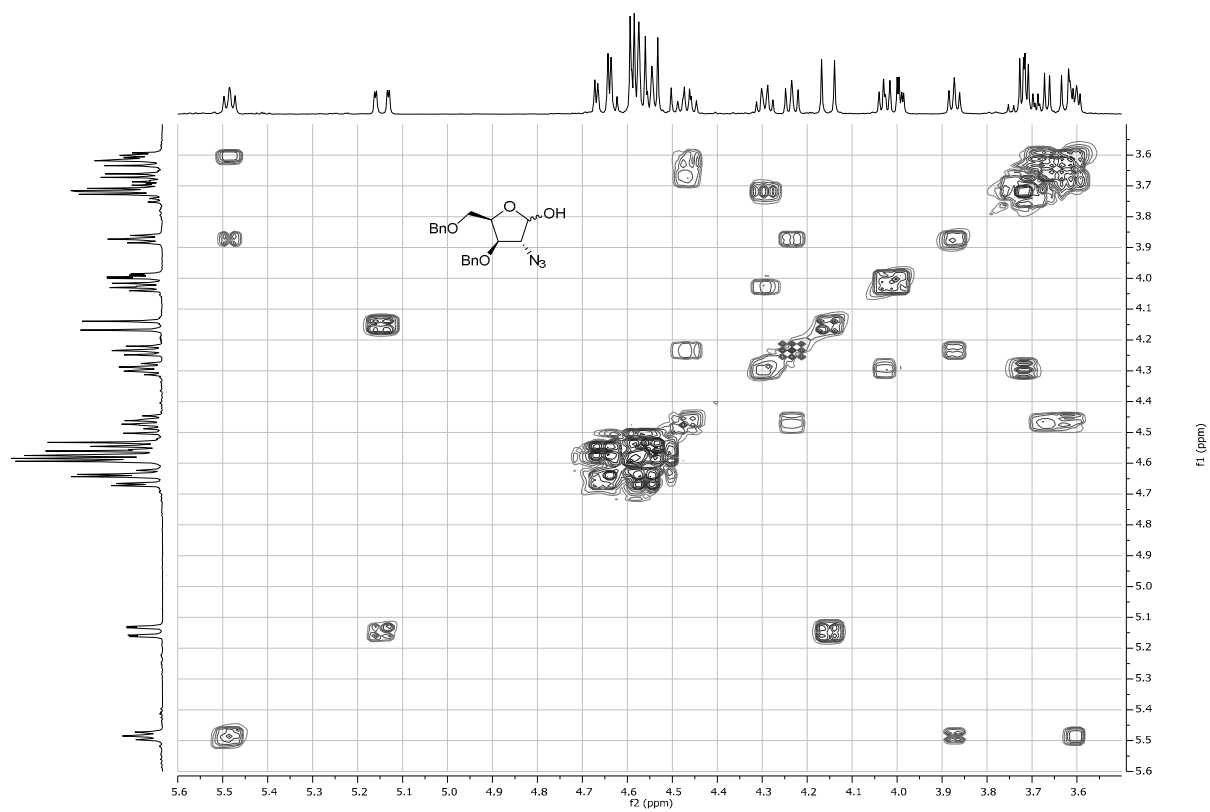

$^1\text{H}$ - $^{13}\text{C}$  HSQC of compound **44**

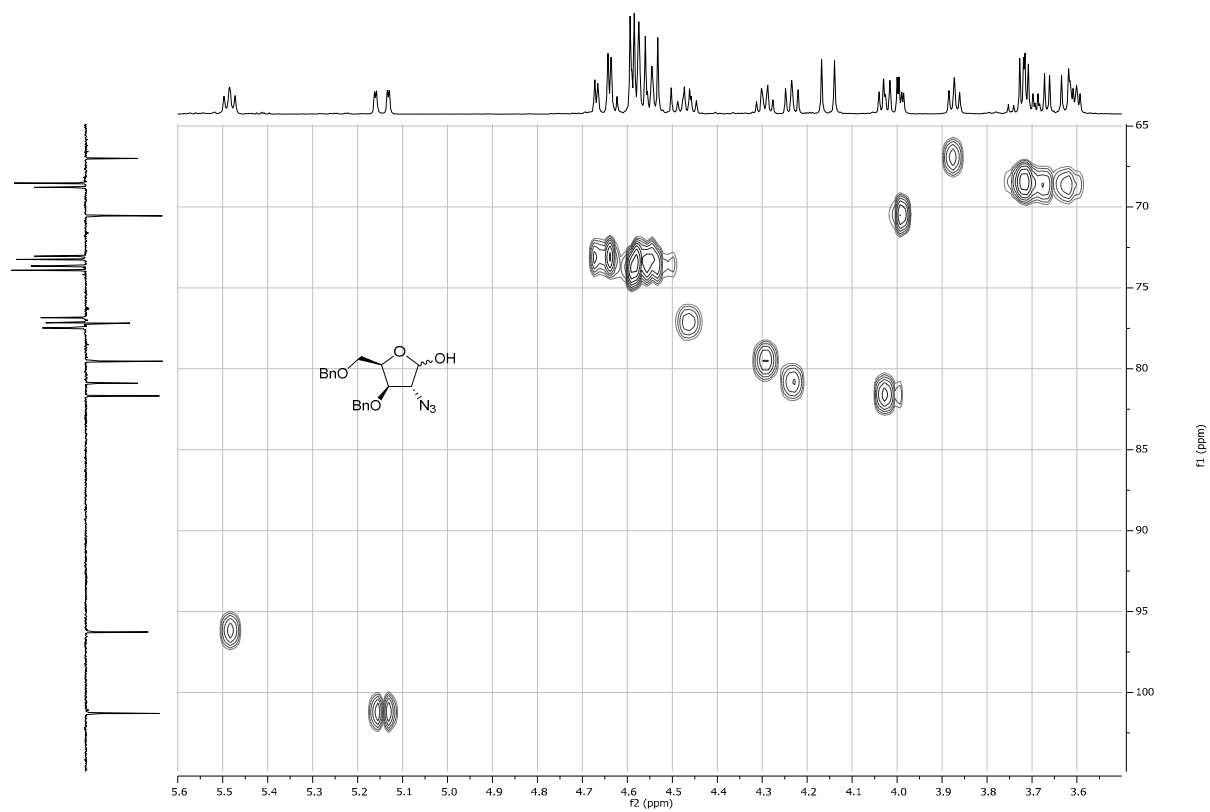

$^1\text{H}$ - $^1\text{H}$  NOESY of compound **44**

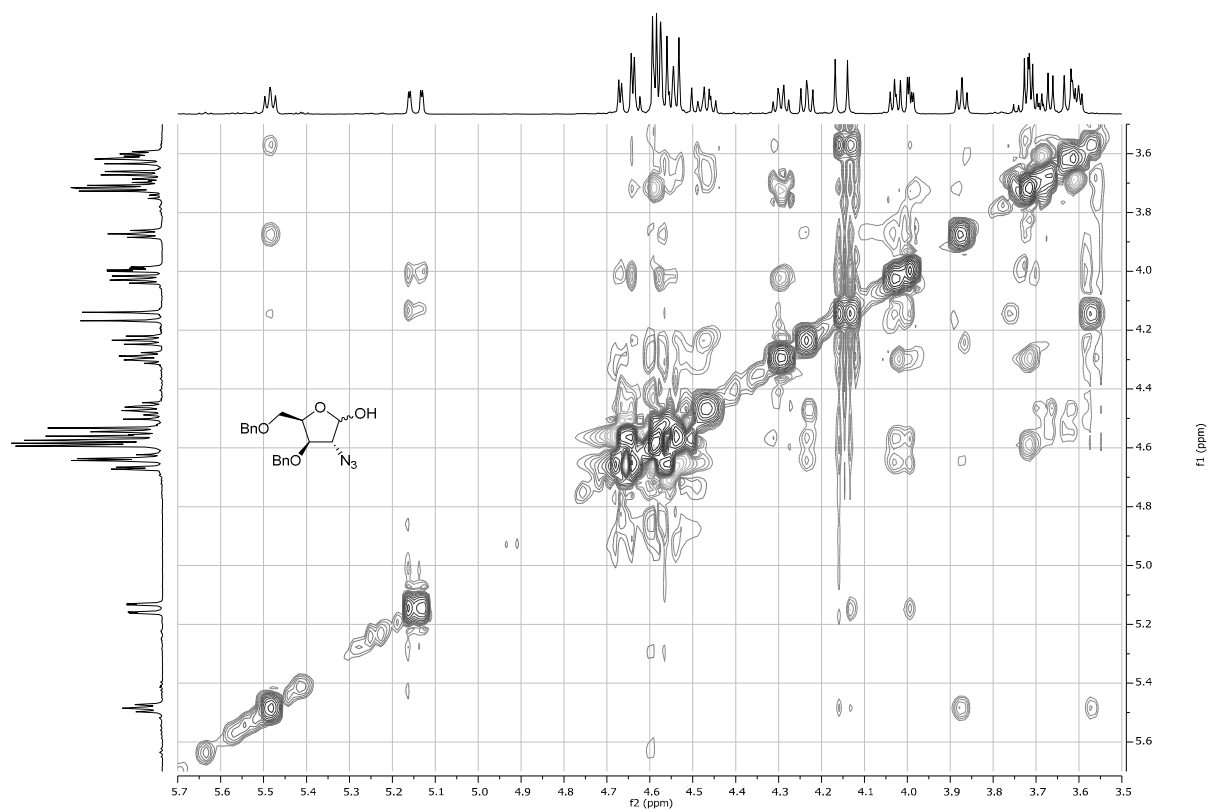

$^1\text{H}$ - $^{13}\text{C}$  HSQC-HECADE of compound **44**

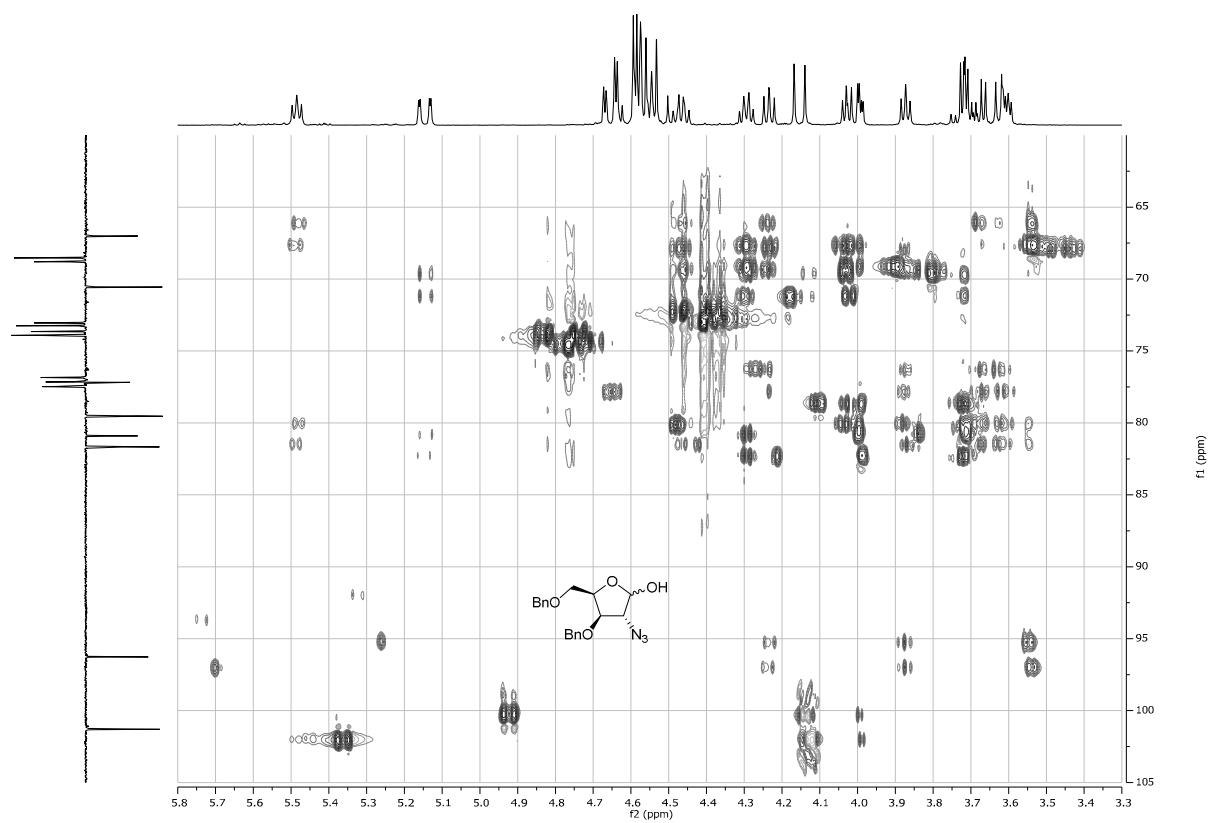

3,5-di-O-benzyl-2-deoxy-2-fluoro- $\alpha/\beta$ -D-ribofuranose (45)

$^1\text{H}$  NMR, 400 MHz,  $\text{CDCl}_3$  of compound 45

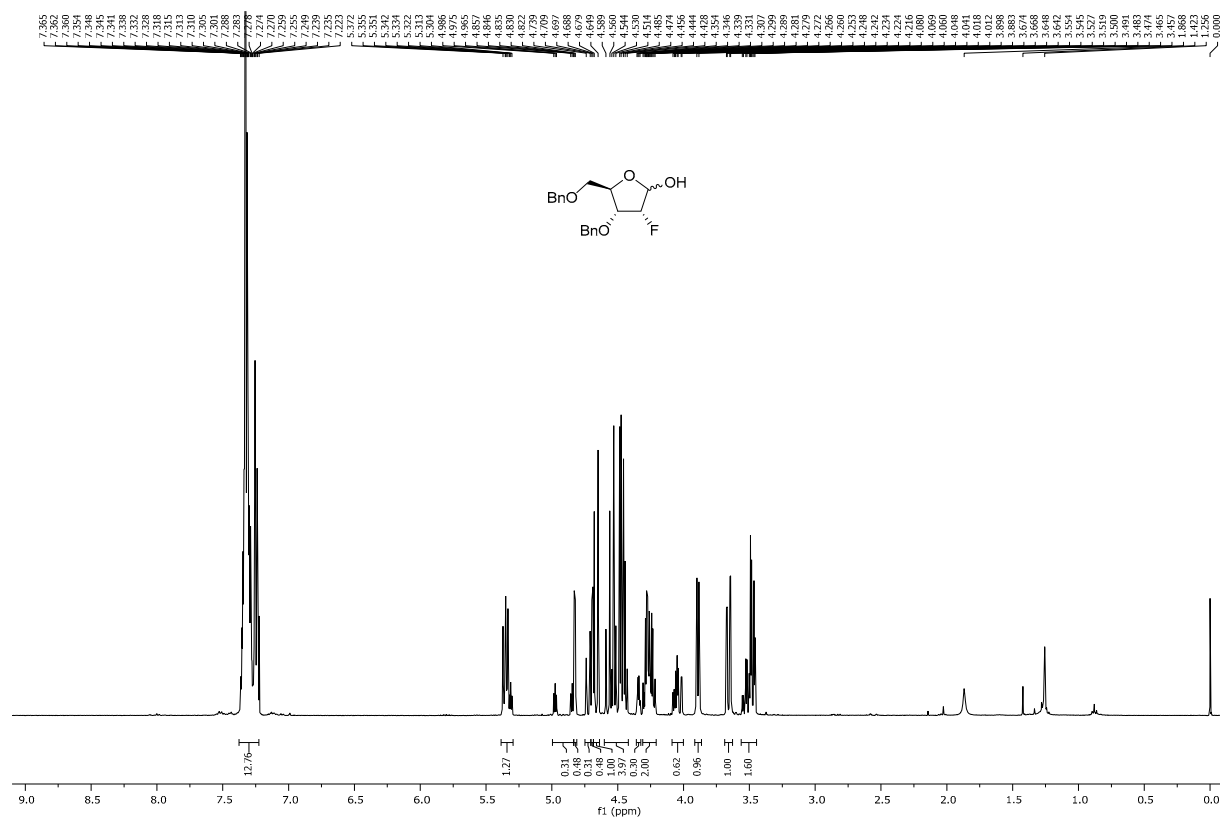

$^{13}\text{C}$ -APT NMR, 126 MHz,  $\text{CDCl}_3$  of compound 45

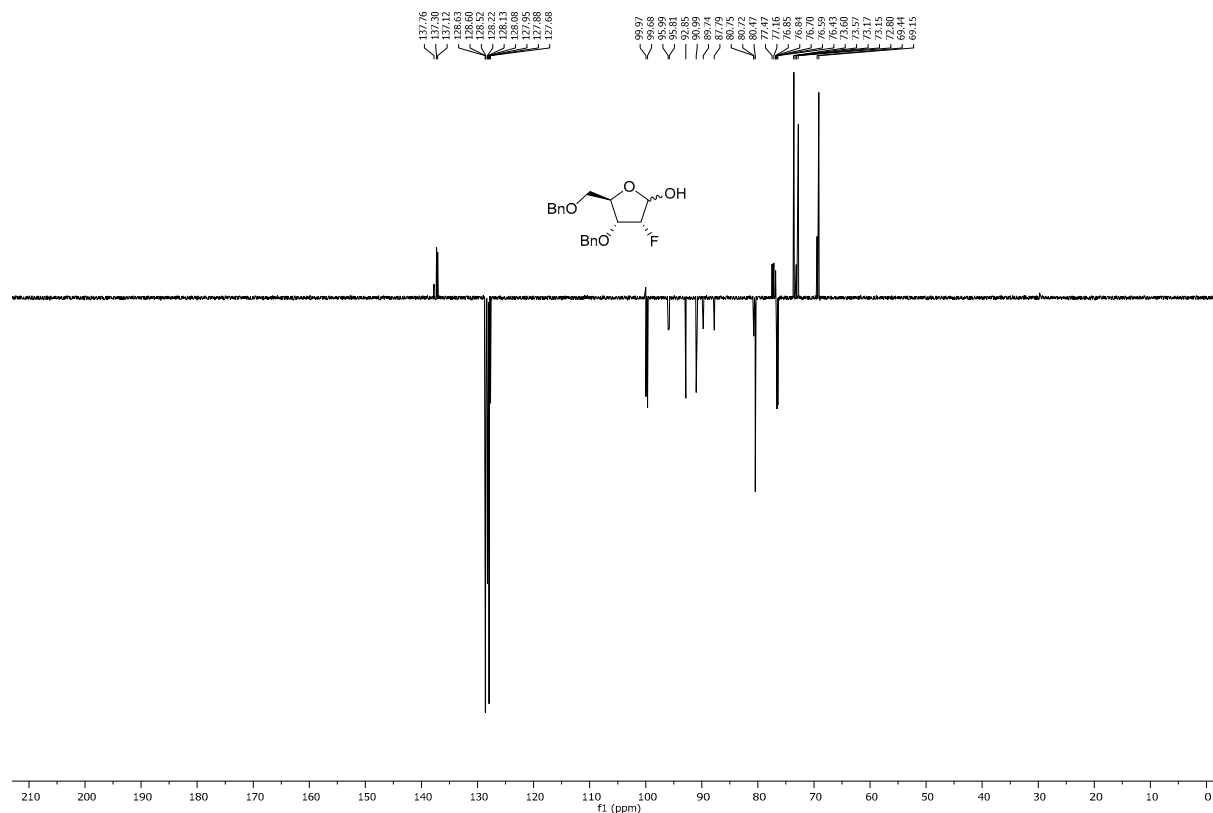

$^1\text{H}$ - $^1\text{H}$  COSY of compound **45**

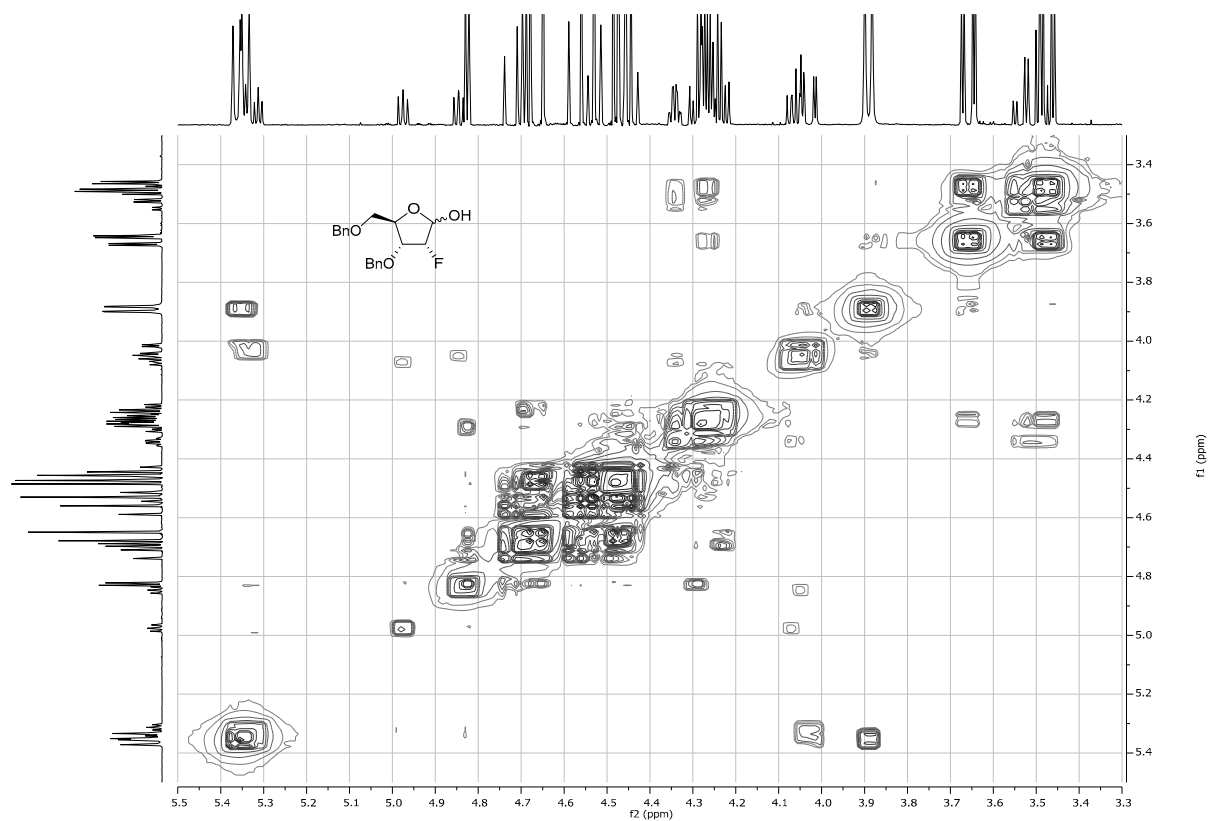

$^1\text{H}$ - $^{13}\text{C}$  HSQC of compound **45**

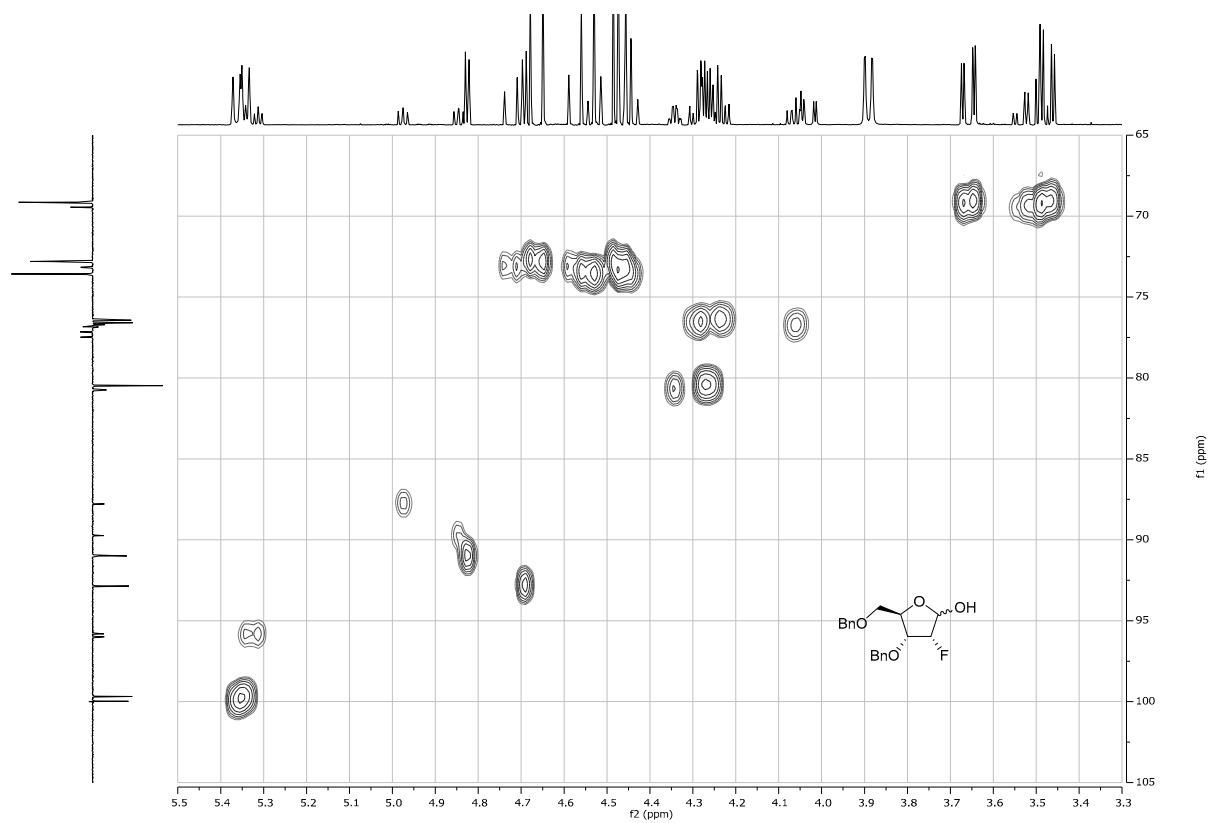

$^1\text{H}$ - $^1\text{H}$  NOESY of compound **45**

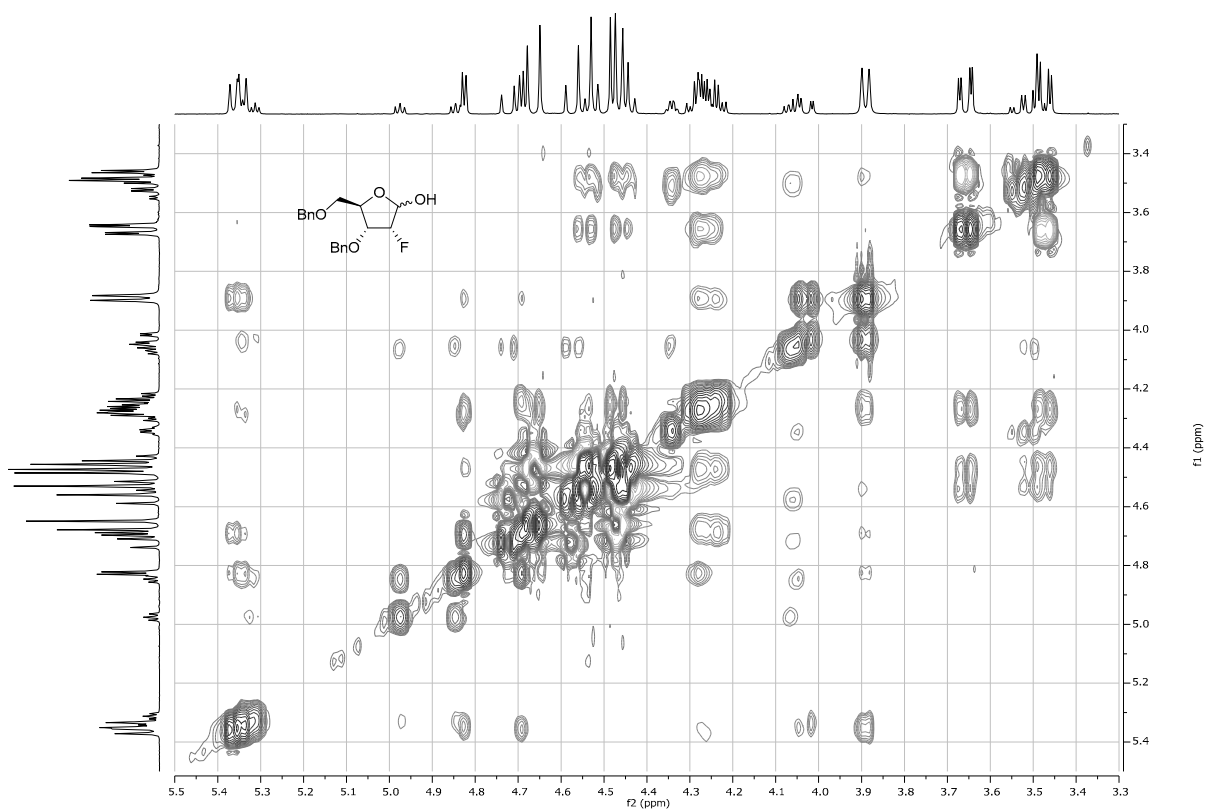

$^1\text{H}$ - $^{13}\text{C}$  HSQC-HECADE of compound **45**

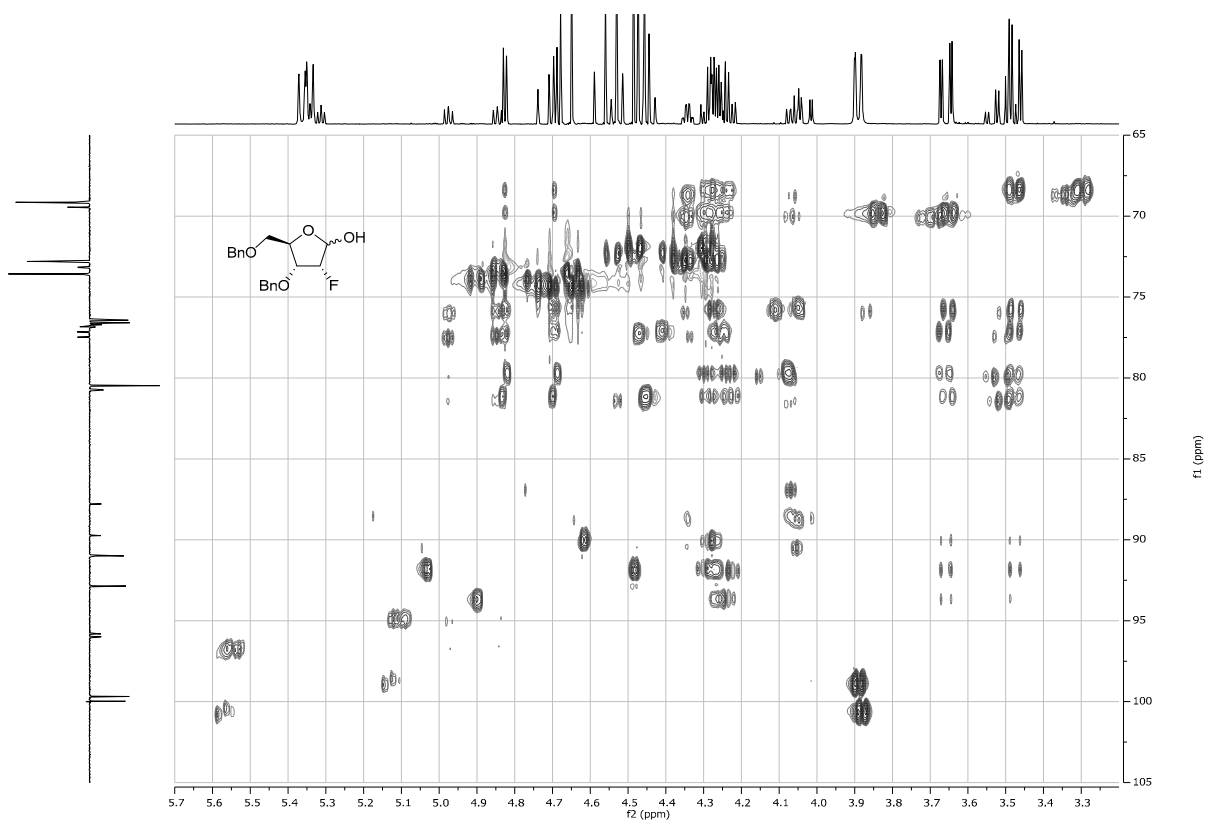

### 3,5-di-O-benzyl-2-deoxy-2-fluoro- $\alpha/\beta$ -D-arabinofuranose (46)

$^1\text{H}$  NMR, 500 MHz,  $\text{CDCl}_3$  of compound 46

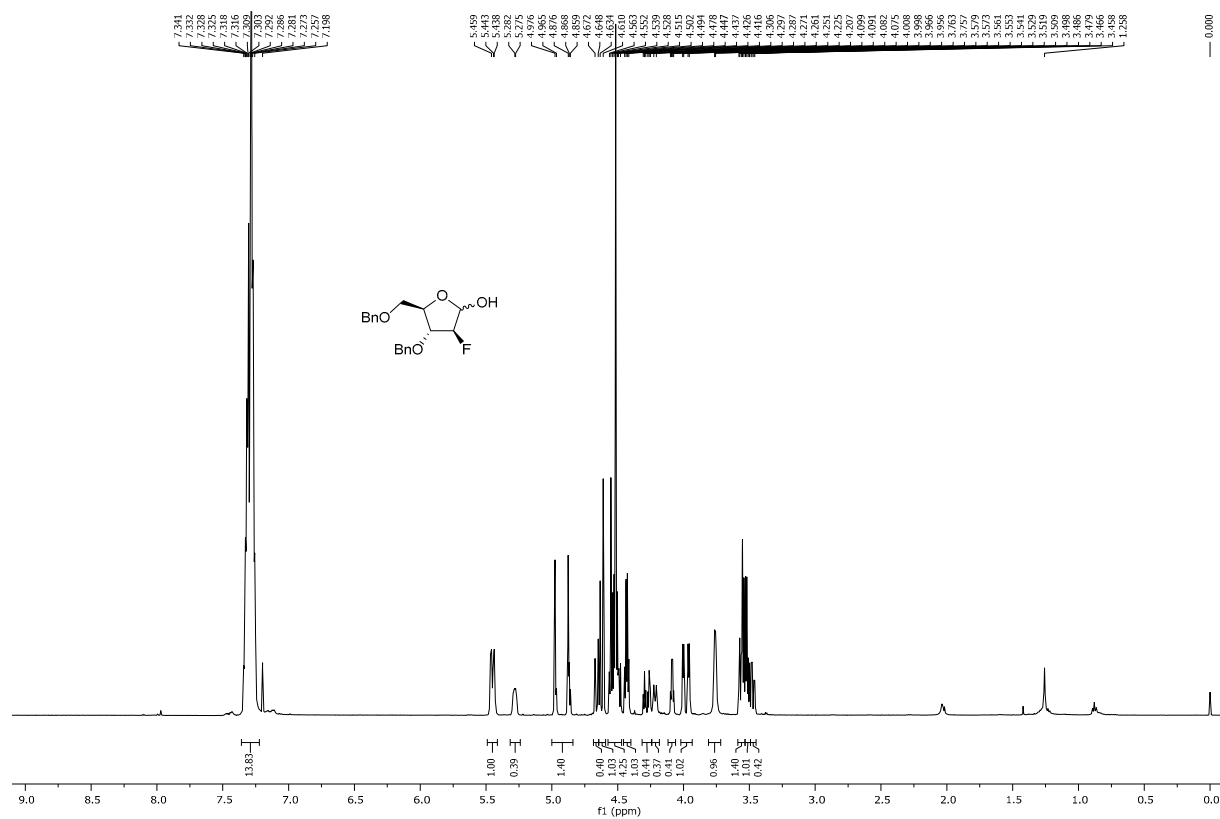

$^{19}\text{F}$ -decoupled  $^1\text{H}$  NMR, (-210 ppm)

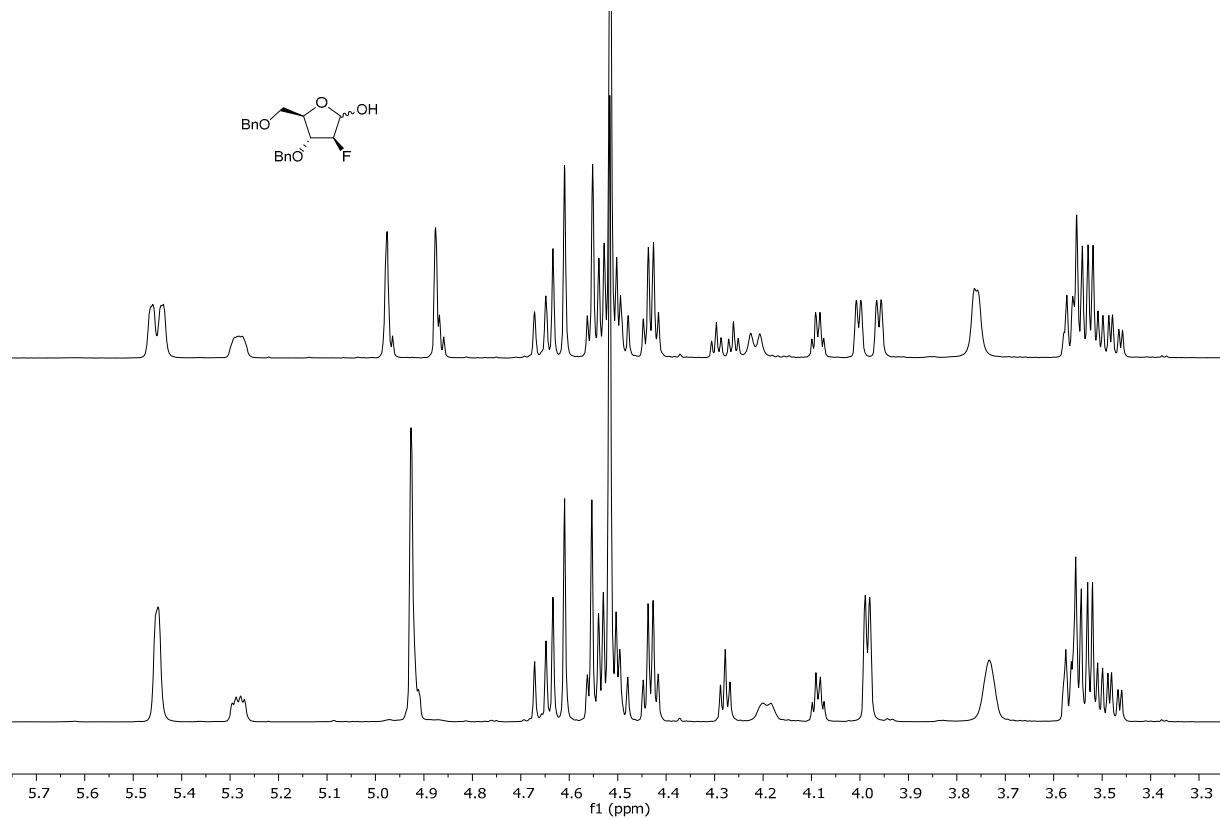

$^{13}\text{C}$ -APT NMR, 126 MHz,  $\text{CDCl}_3$  of compound **46**

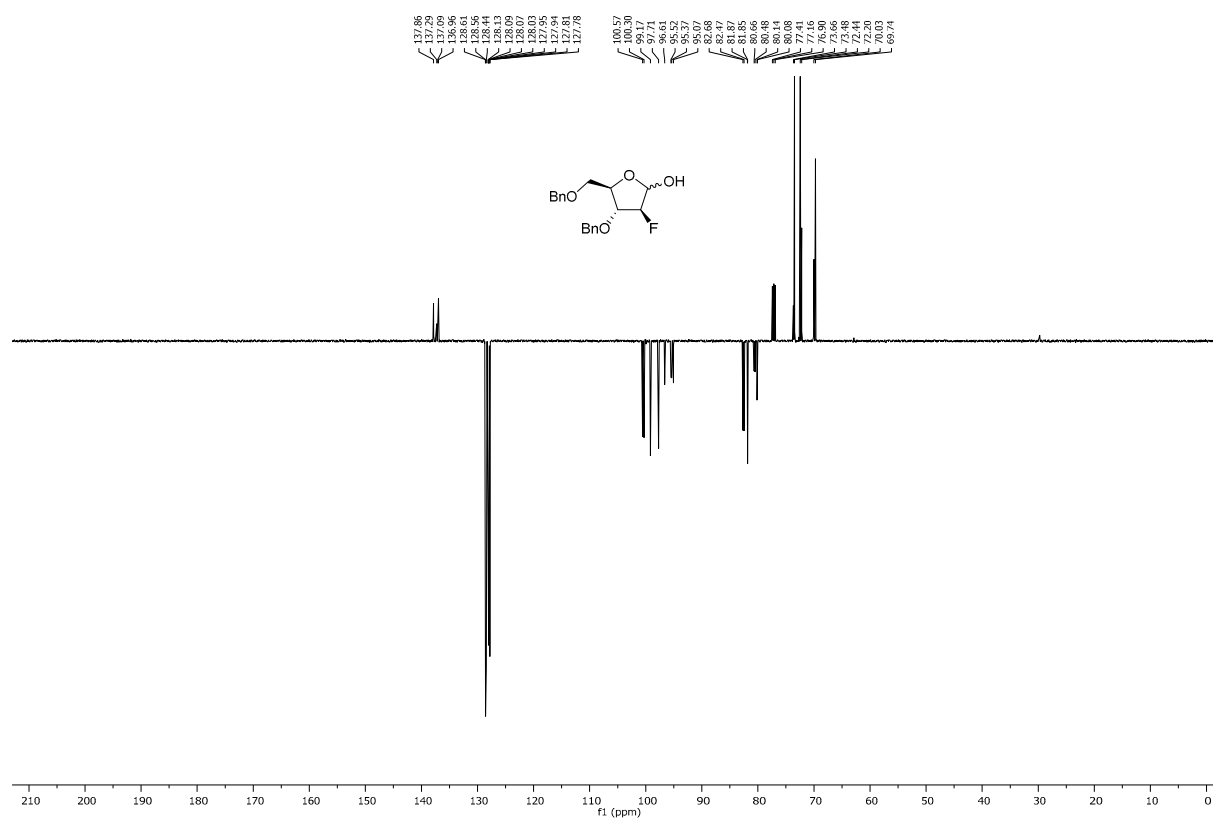

$^{19}\text{F}$  NMR, 471 MHz,  $\text{CDCl}_3$  of compound **46**

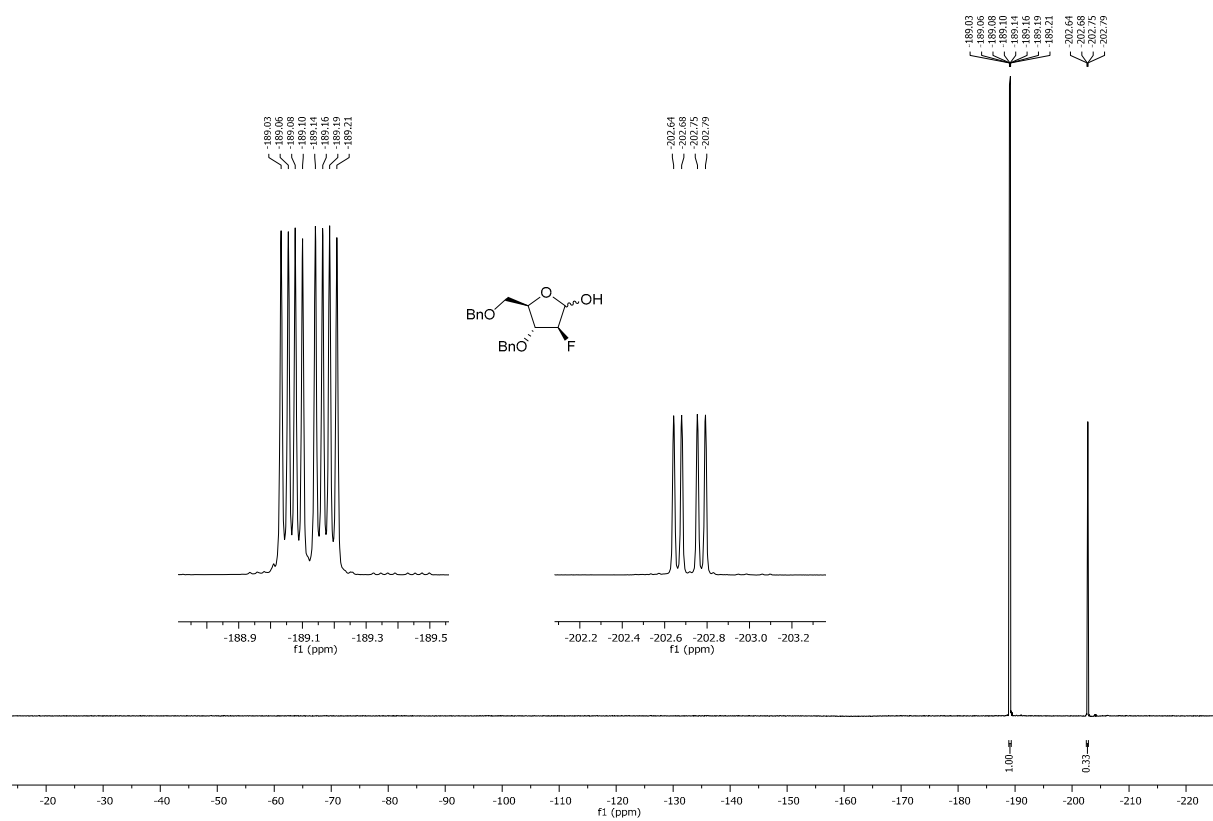

$^1\text{H}$ - $^1\text{H}$  COSY of compound **46**

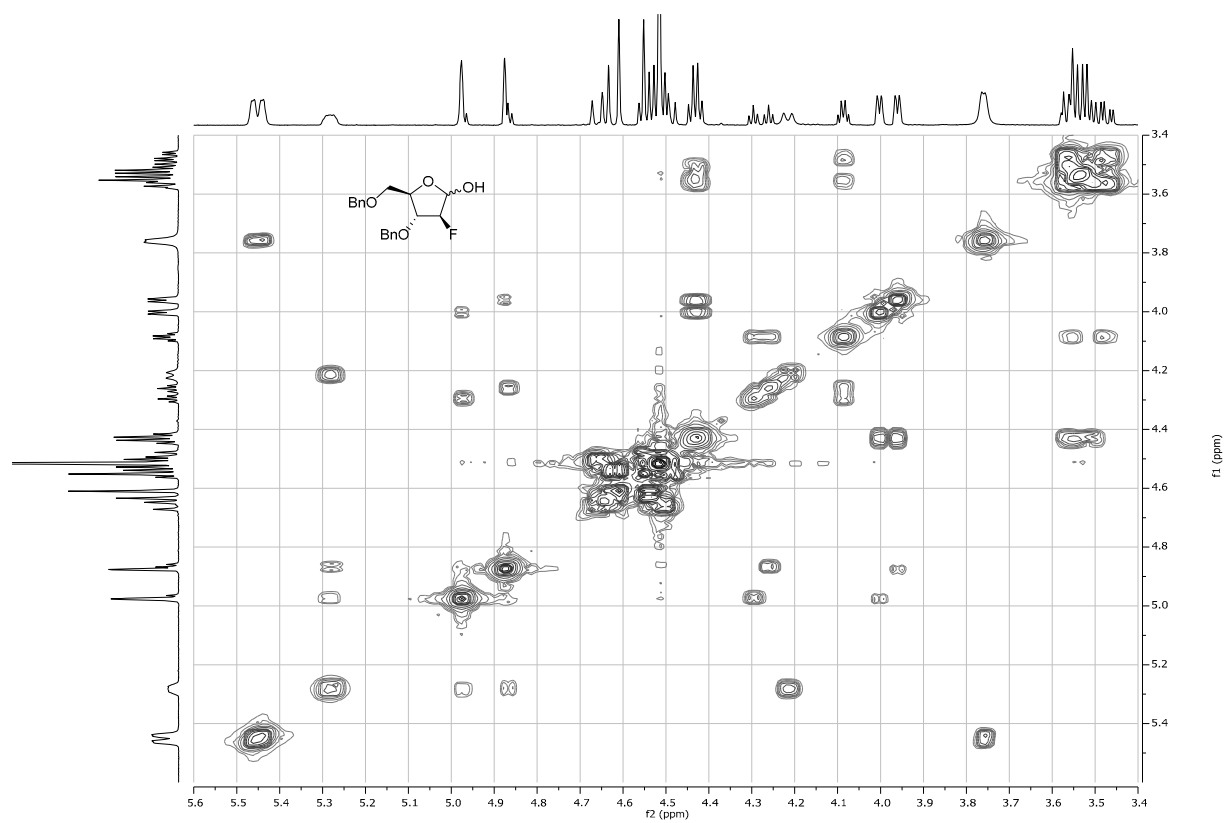

$^1\text{H}$ - $^{13}\text{C}$  HSQC of compound **46**

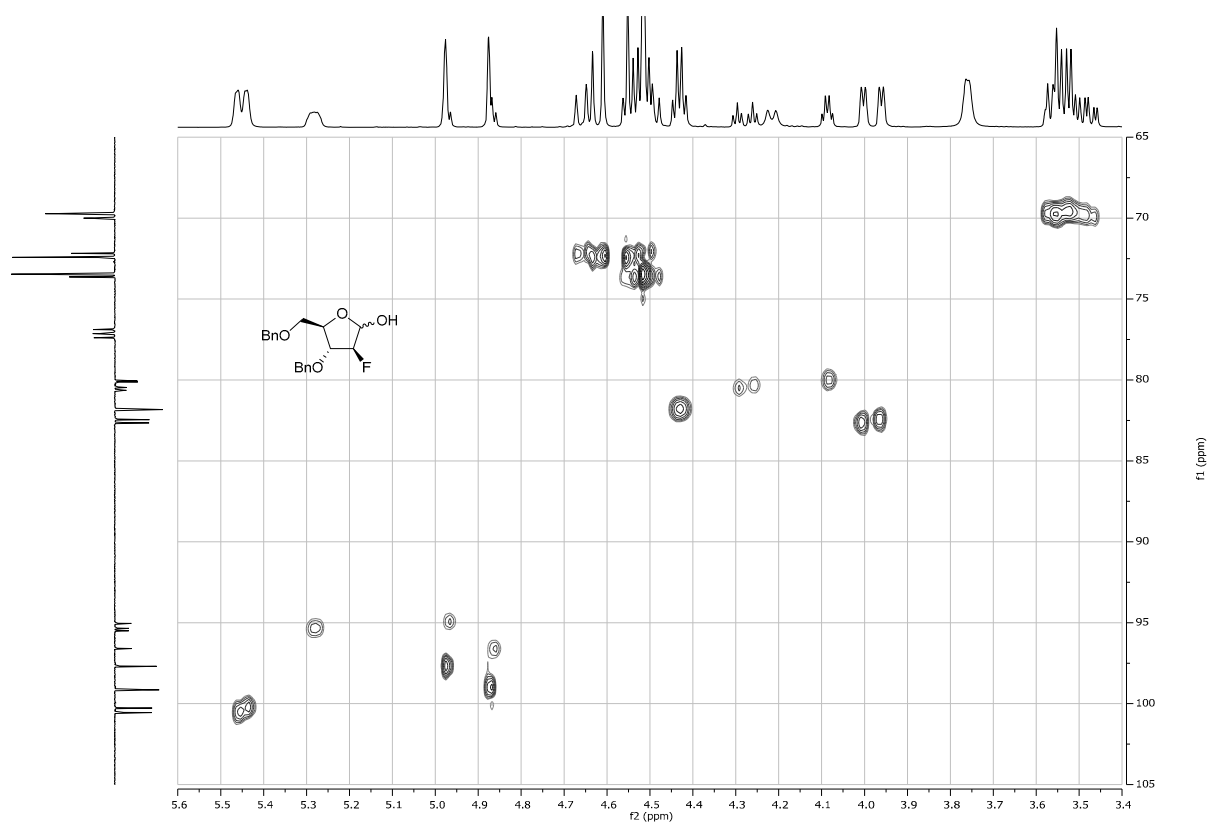



$^1\text{H}$ - $^1\text{H}$  NOESY of compound **46**

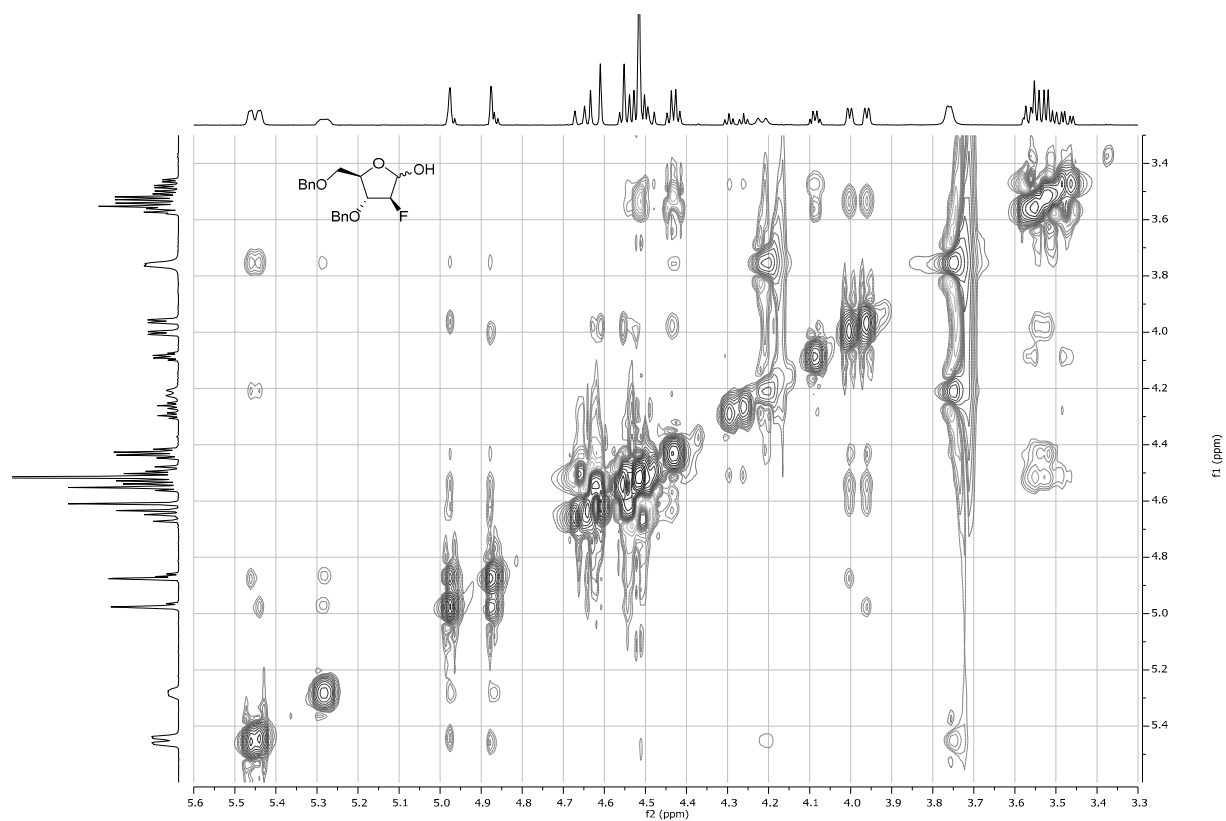

$^1\text{H}$ - $^{13}\text{C}$  HSQC-HECADE of compound **46**

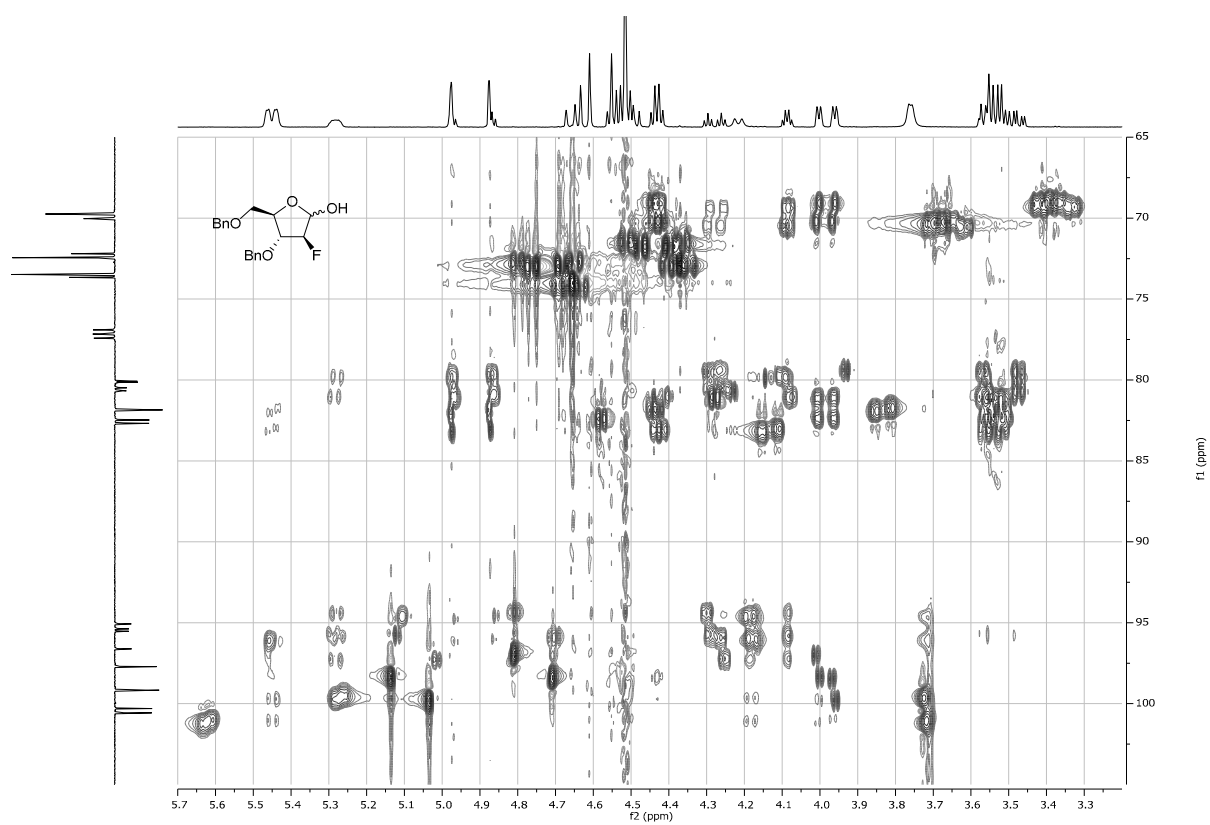

### 3,5-di-O-benzyl-2-deoxy-2-fluoro- $\alpha/\beta$ -D-lyxofuranose (47)

$^1\text{H}$  NMR, 400 MHz,  $\text{CDCl}_3$  of compound 47

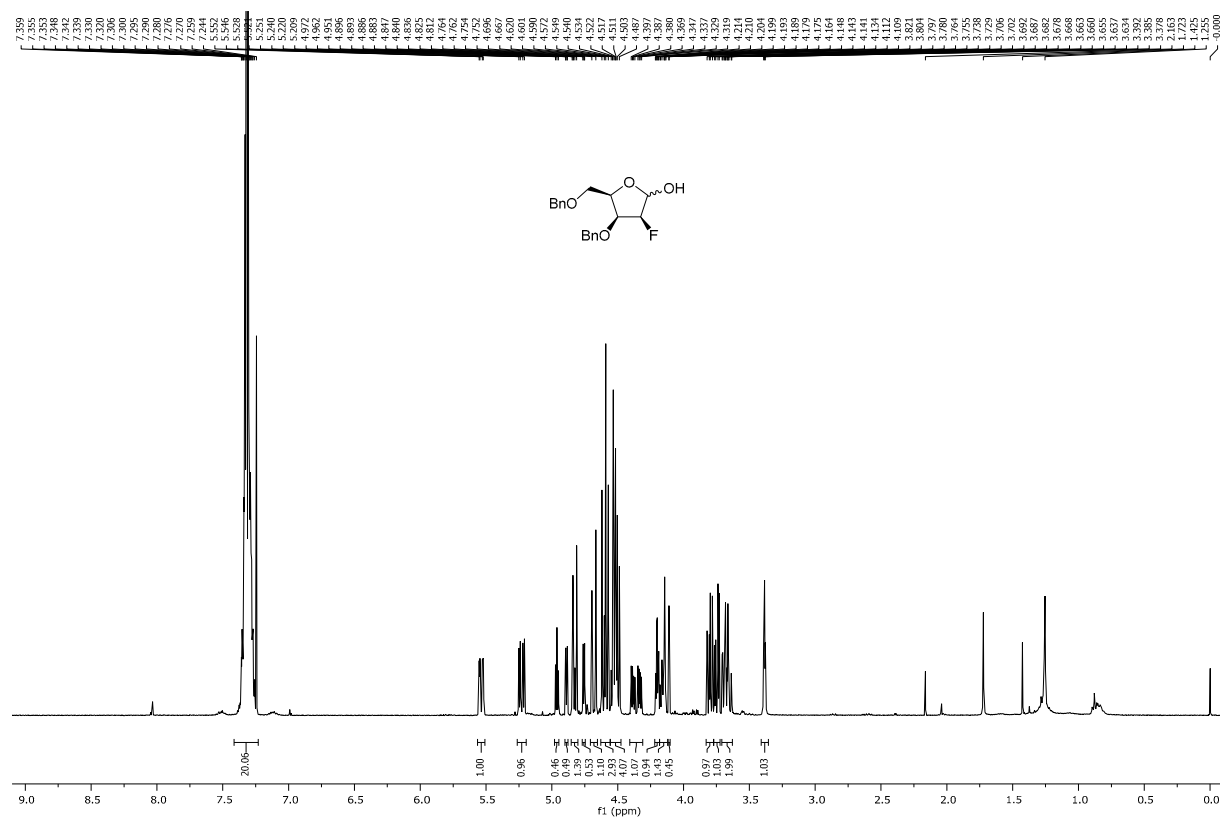

$^{19}\text{F}$ -decoupled  $^1\text{H}$  NMR, (-200 ppm)

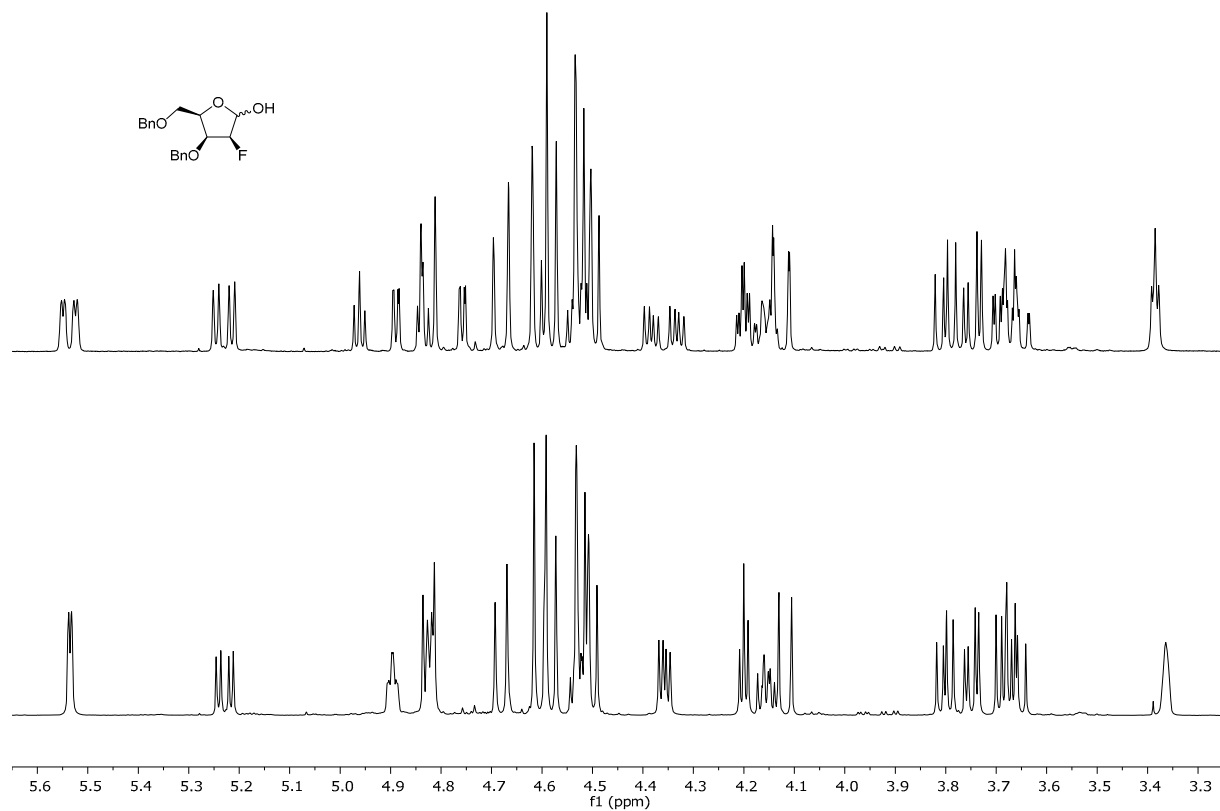

$^{13}\text{C}$ -APT NMR, 126 MHz,  $\text{CDCl}_3$  of compound **47**

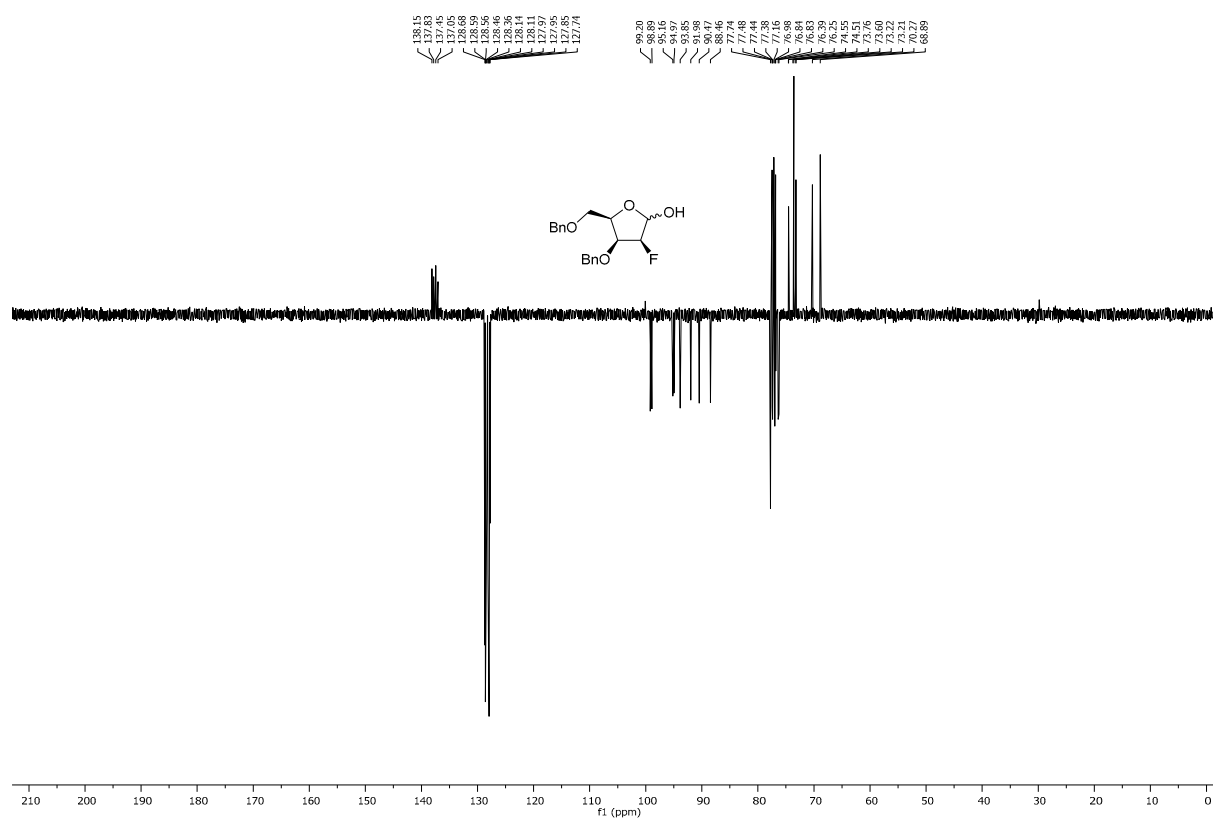

$^{19}\text{F}$  NMR, 471 MHz,  $\text{CDCl}_3$  of compound **47**

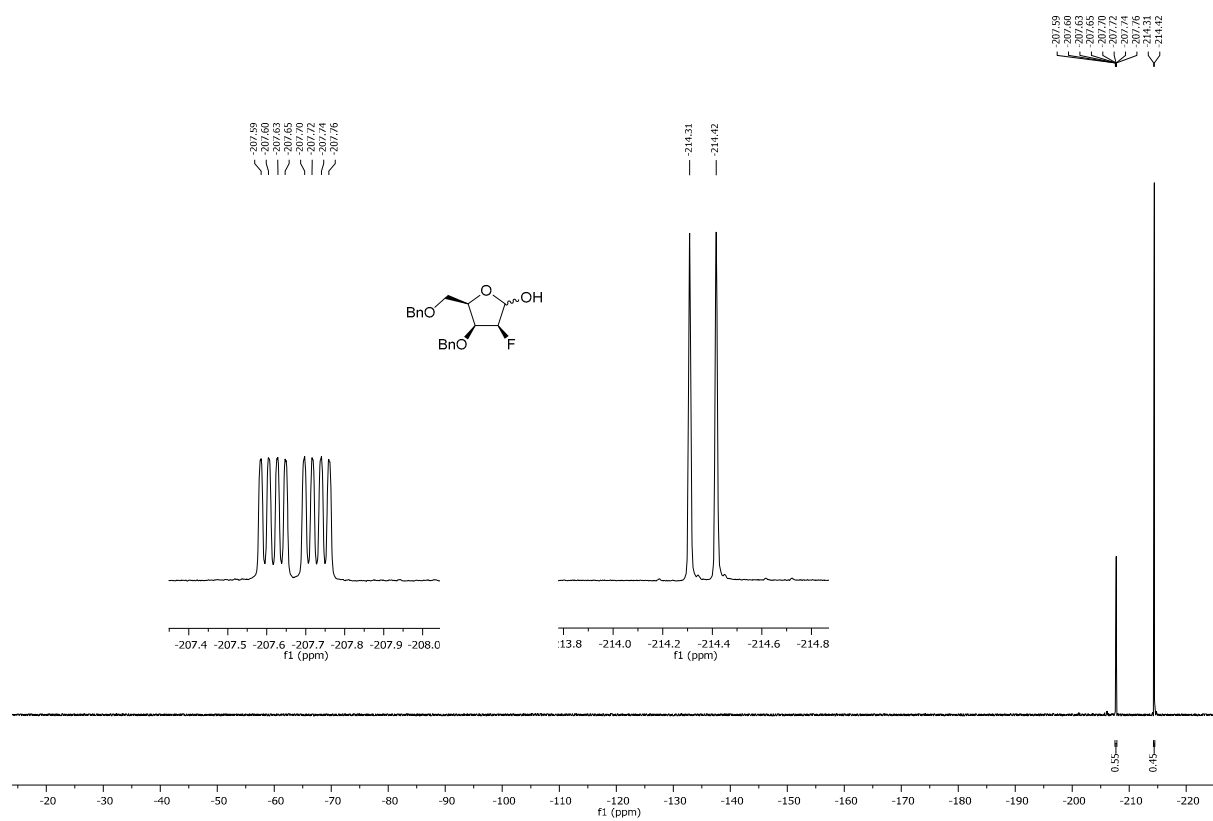

$^1\text{H}$ - $^1\text{H}$  COSY of compound **47**

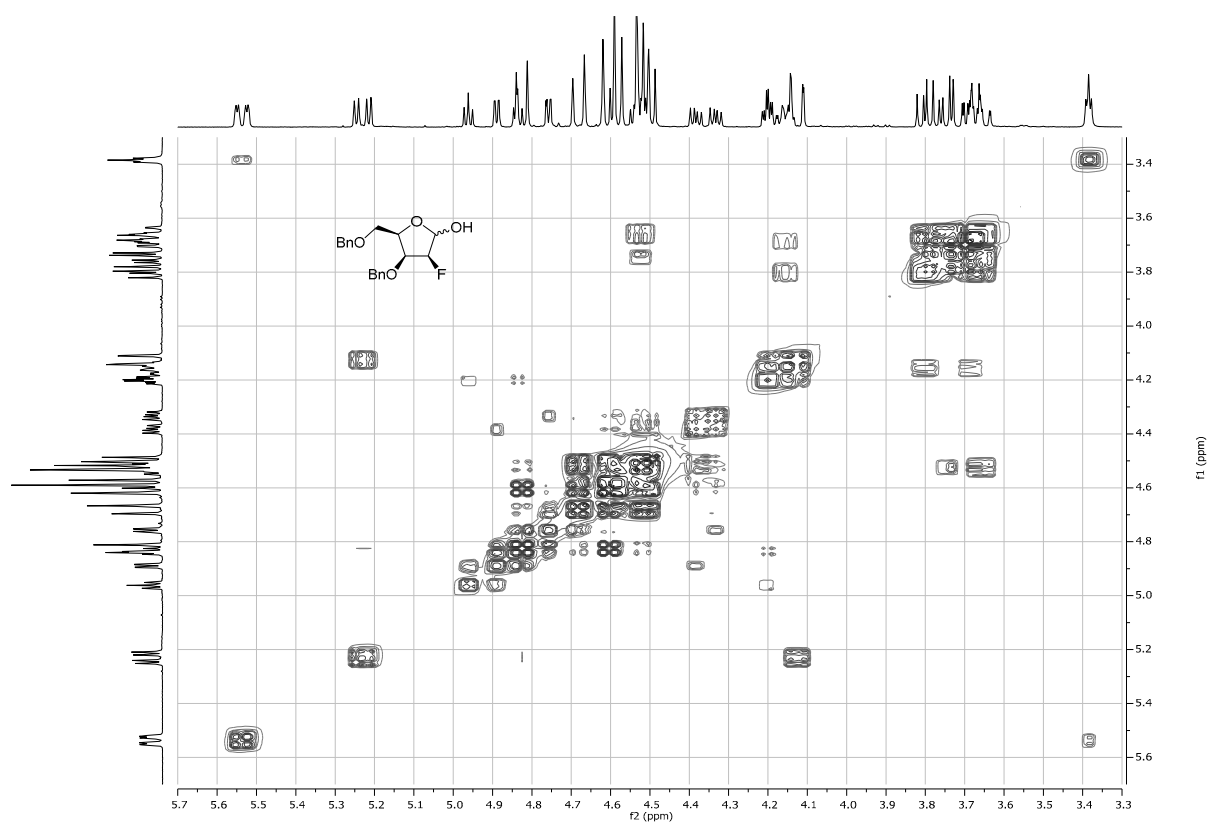

$^1\text{H}$ - $^{13}\text{C}$  HSQC of compound **47**

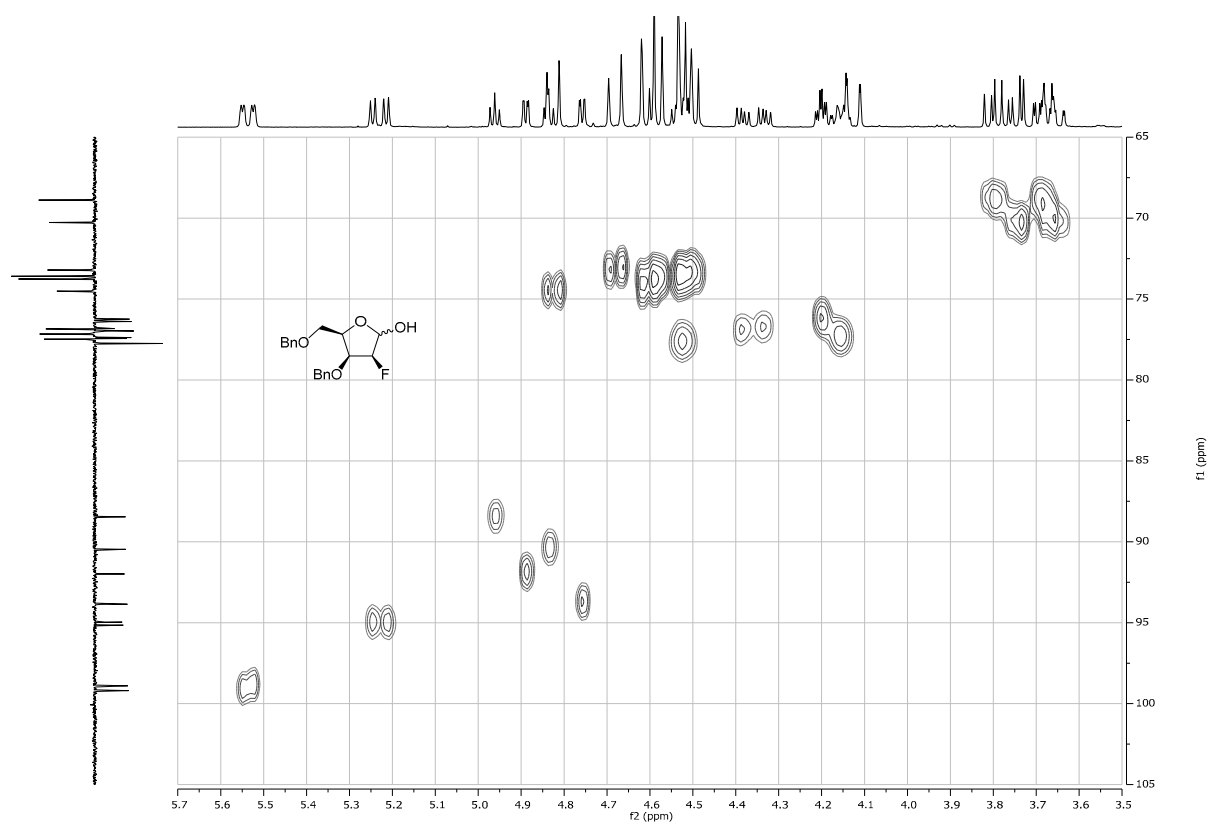

$^1\text{H}$ - $^1\text{H}$  NOESY of compound **47**

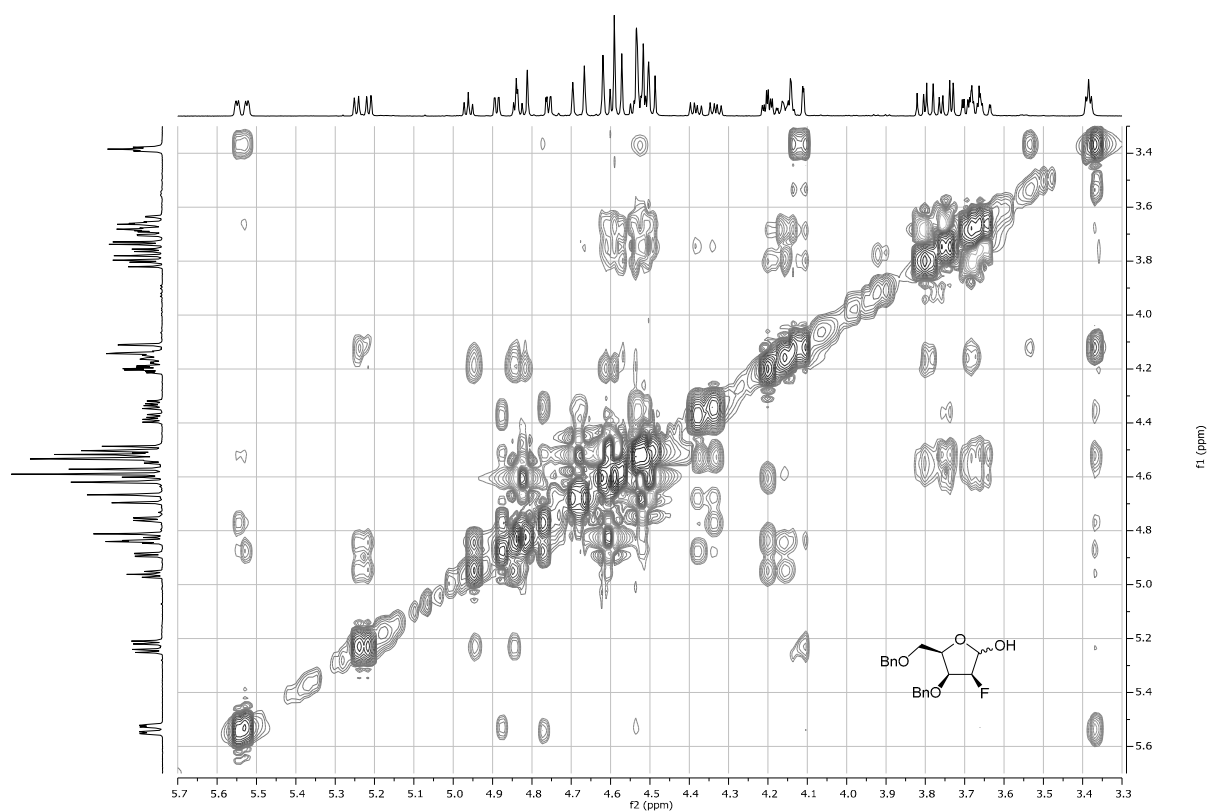

$^1\text{H}$ - $^{13}\text{C}$  HSQC-HECADE of compound **47**

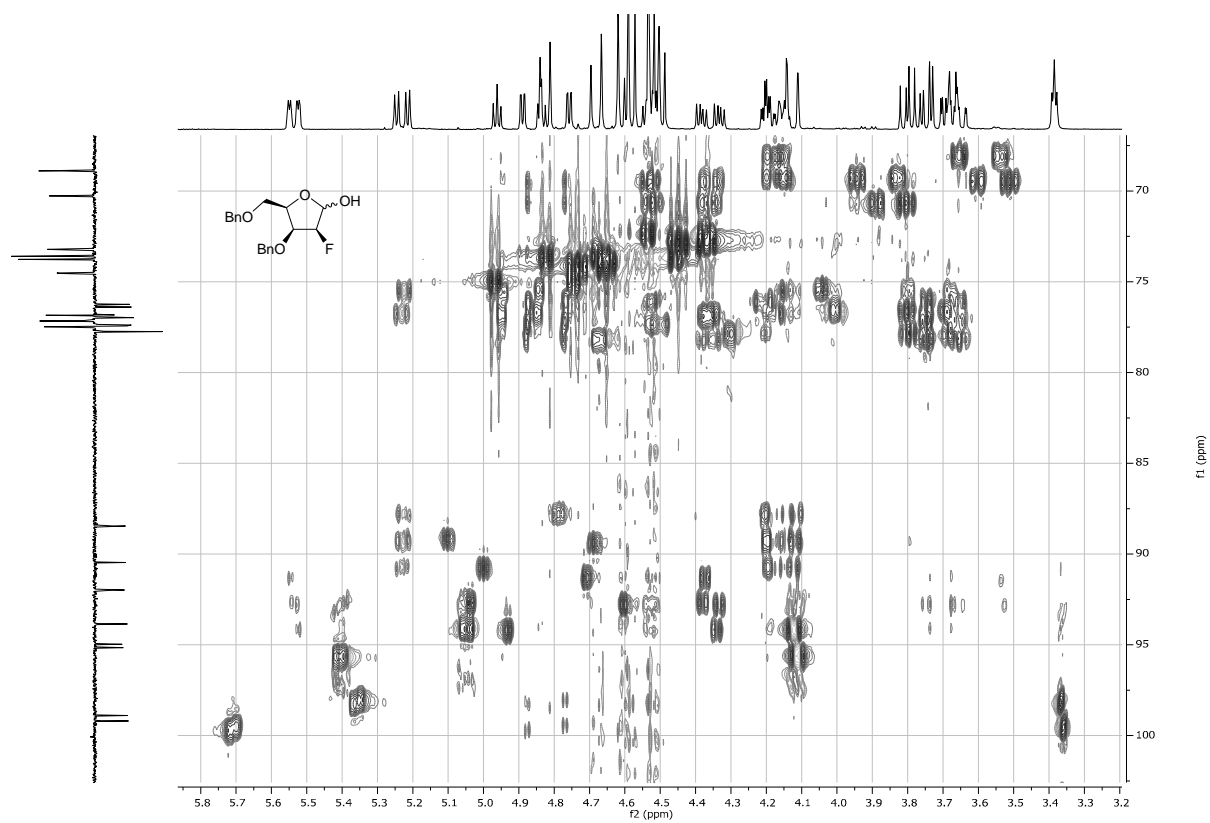

3,5-di-O-benzyl-2-deoxy-2-fluoro- $\alpha/\beta$ -D-xylofuranose (**48**)

$^1\text{H}$  NMR, 500 MHz,  $\text{CDCl}_3$  of compound **48**

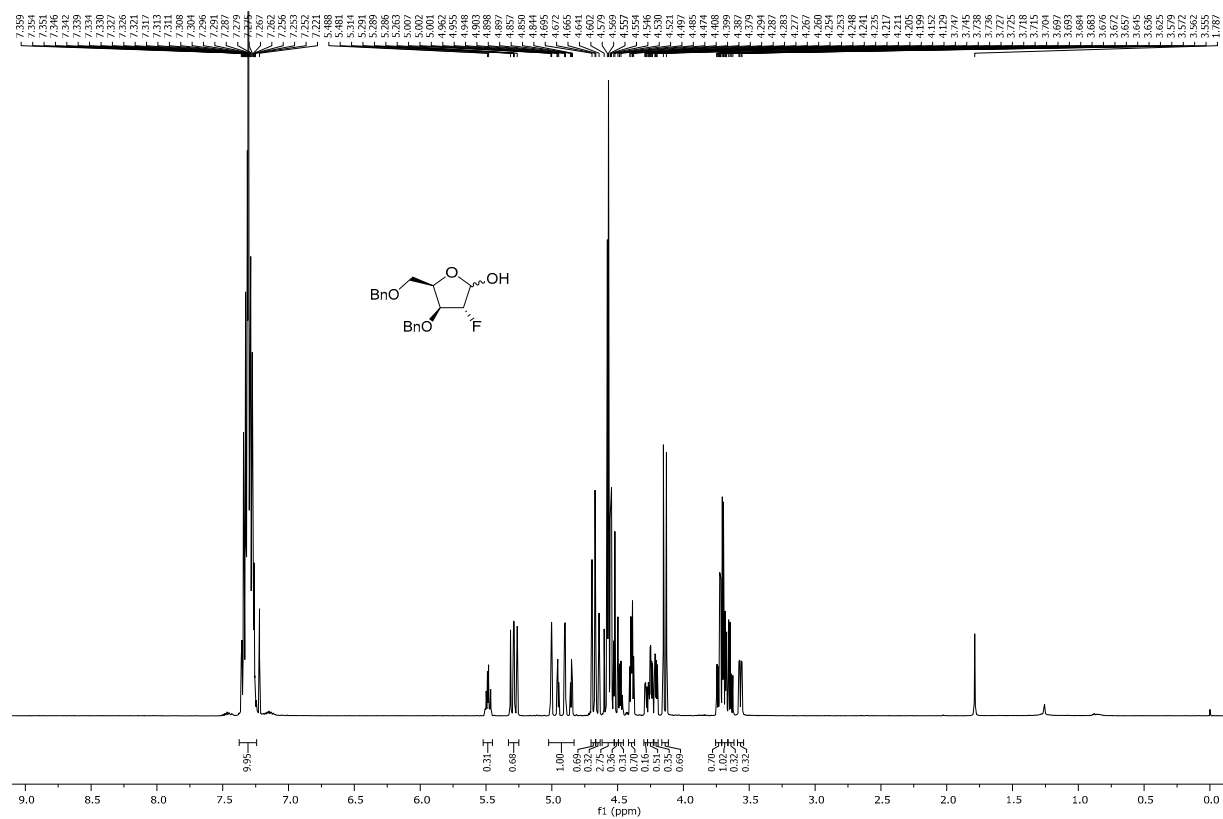

$^{19}\text{F}$ -decoupled  $^1\text{H}$  NMR, (-200 ppm)

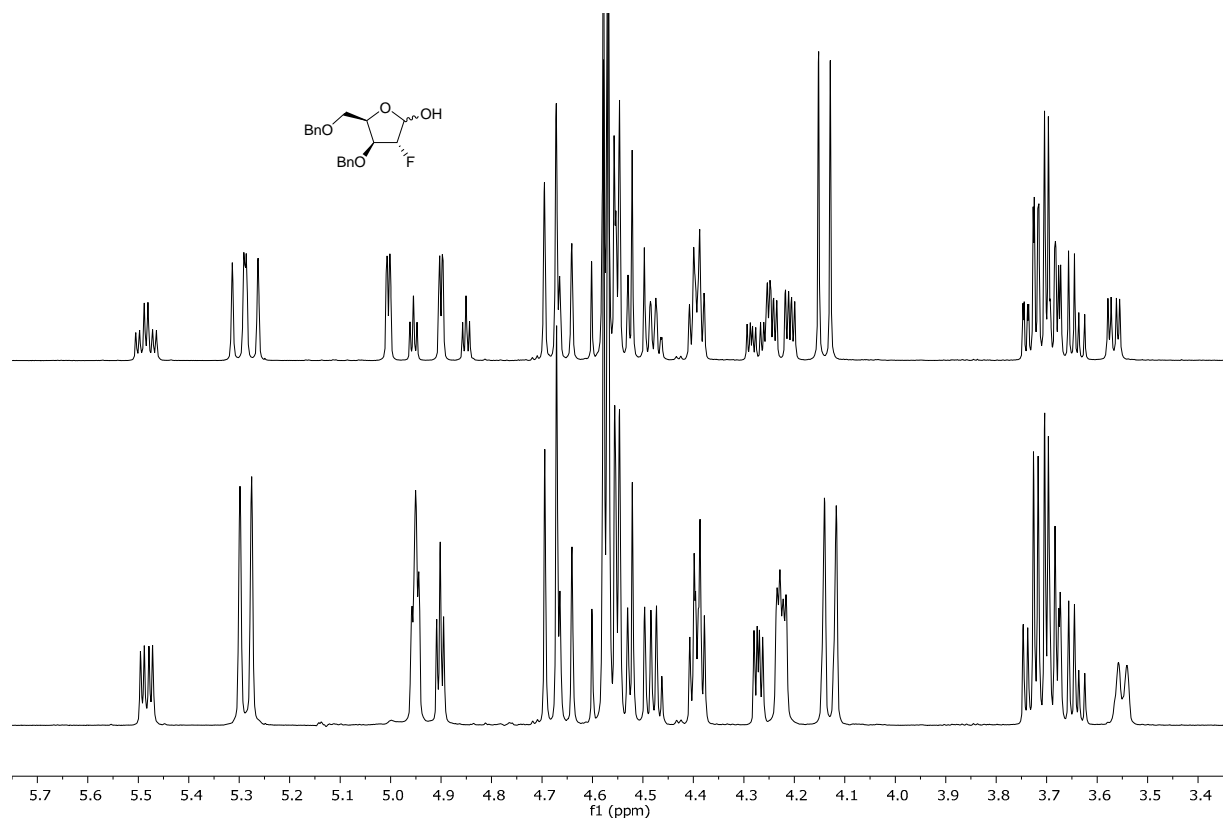

$^{13}\text{C}$ -APT NMR, 126 MHz,  $\text{CDCl}_3$  of compound **48**

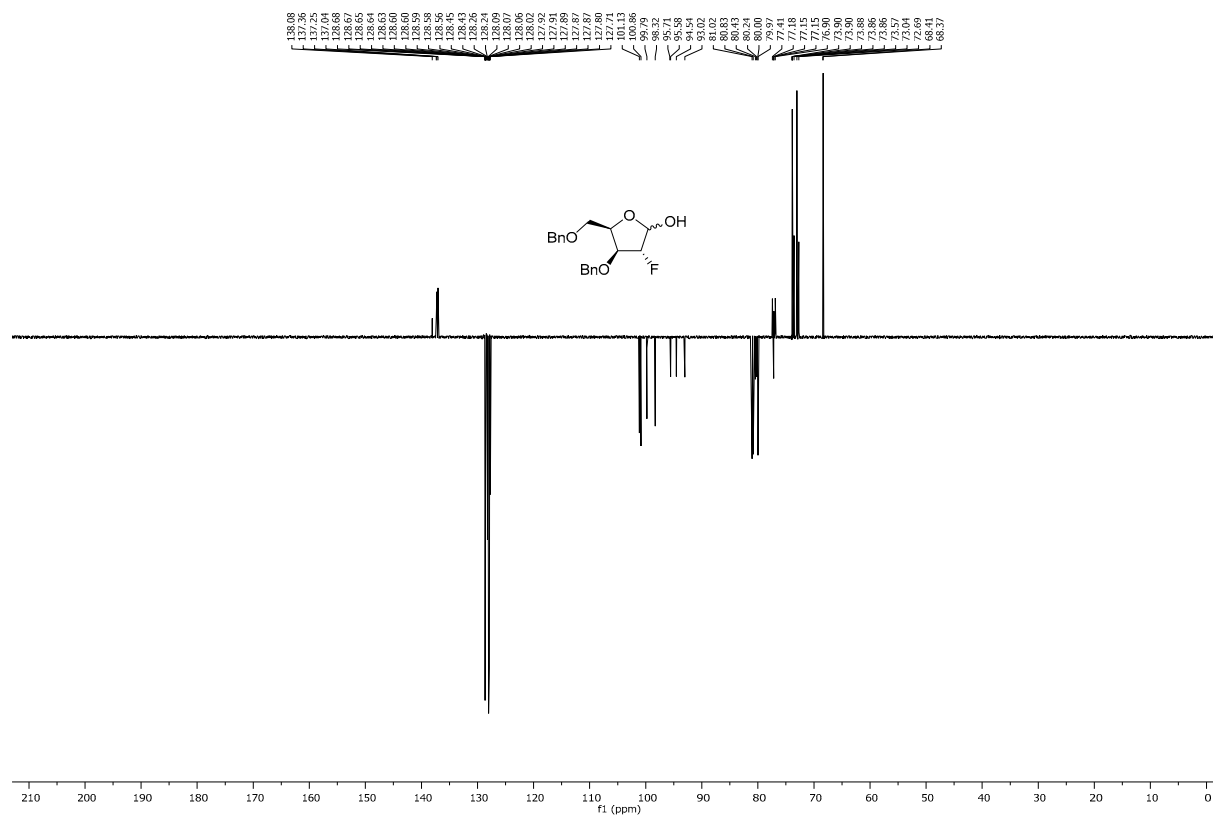

$^{19}\text{F}$  NMR, 471 MHz,  $\text{CDCl}_3$  of compound **48**

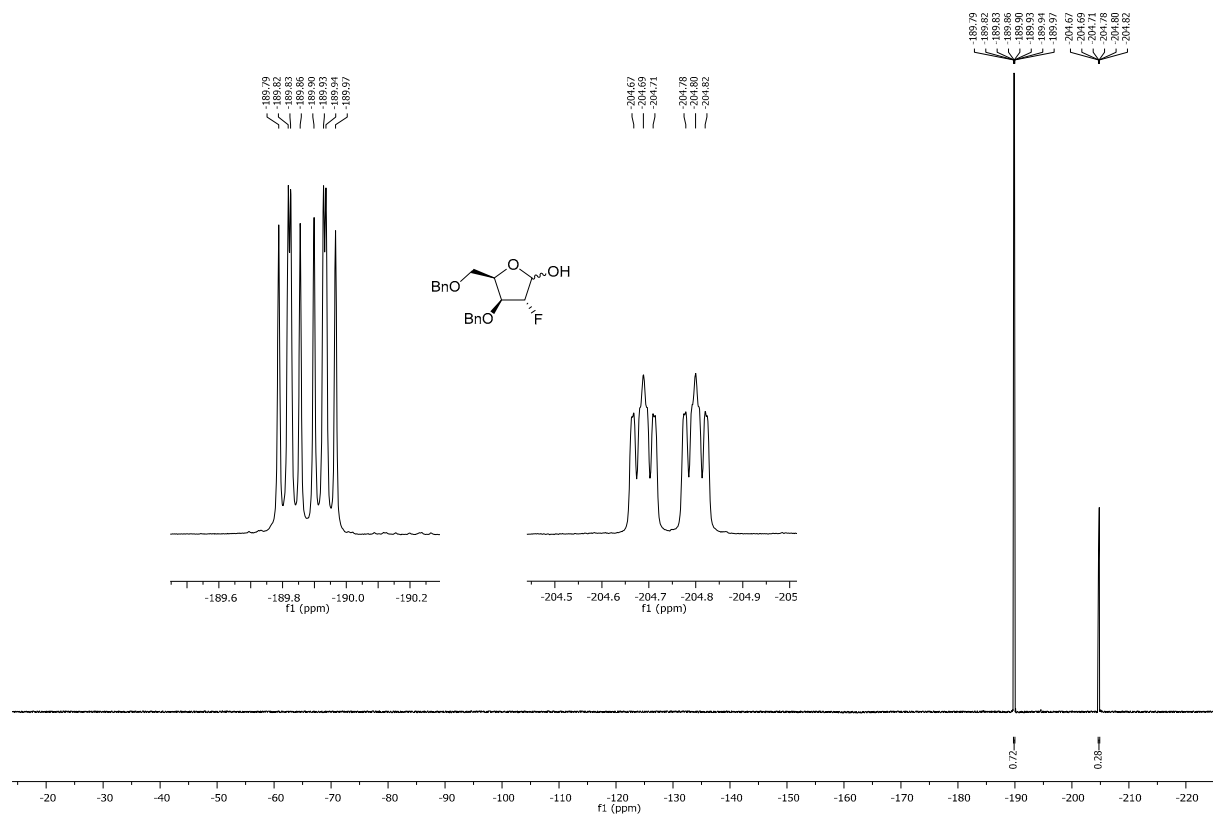

$^1\text{H}$ - $^1\text{H}$  COSY of compound **48**

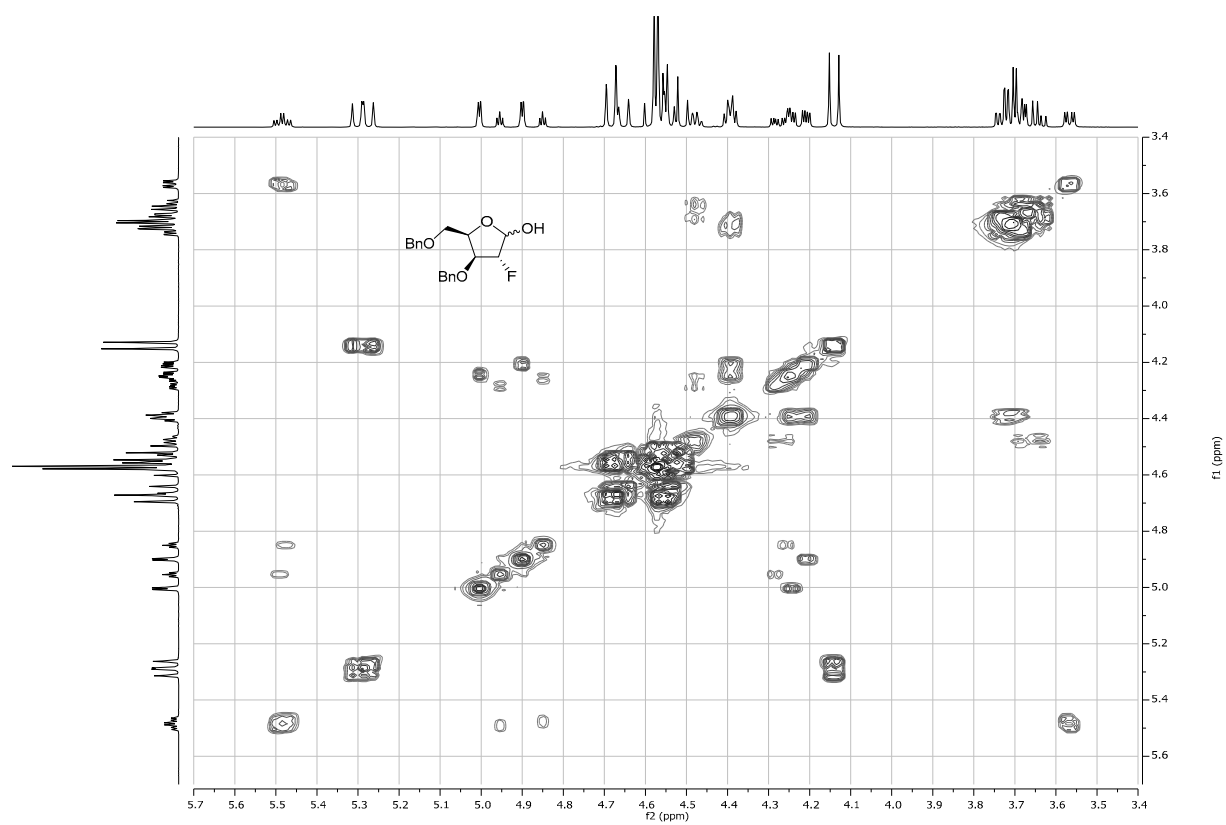

$^1\text{H}$ - $^{13}\text{C}$  HSQC of compound **48**

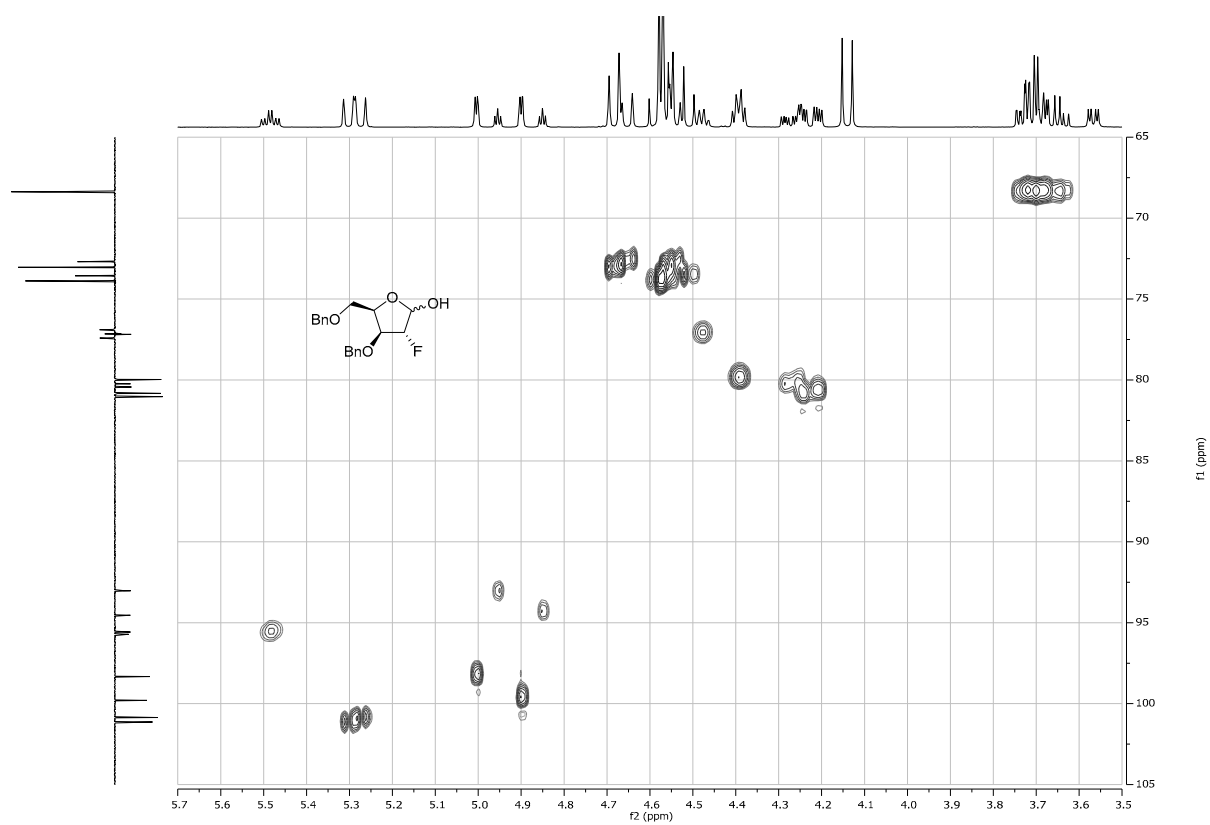



$^1\text{H}$ - $^1\text{H}$  NOESY of compound **48**

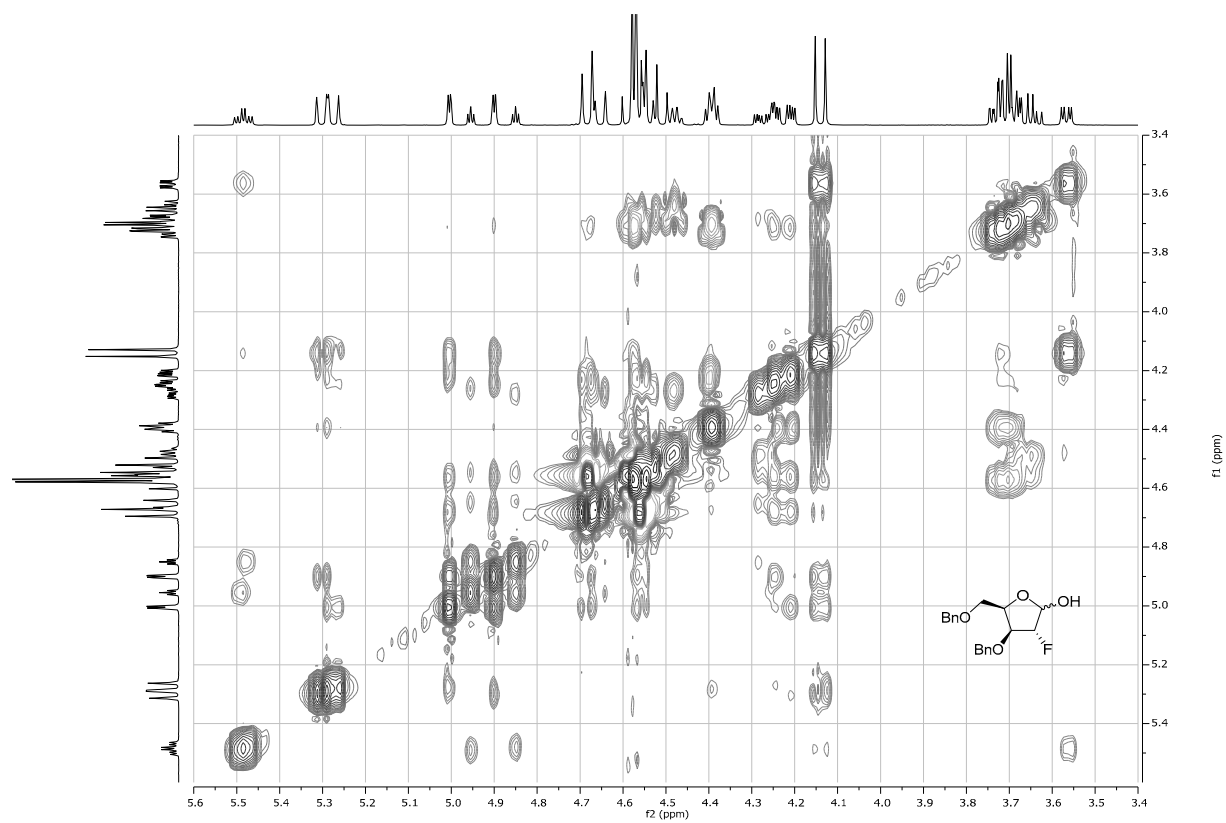

$^1\text{H}$ - $^{13}\text{C}$  HSQC-HECADE of compound **48**

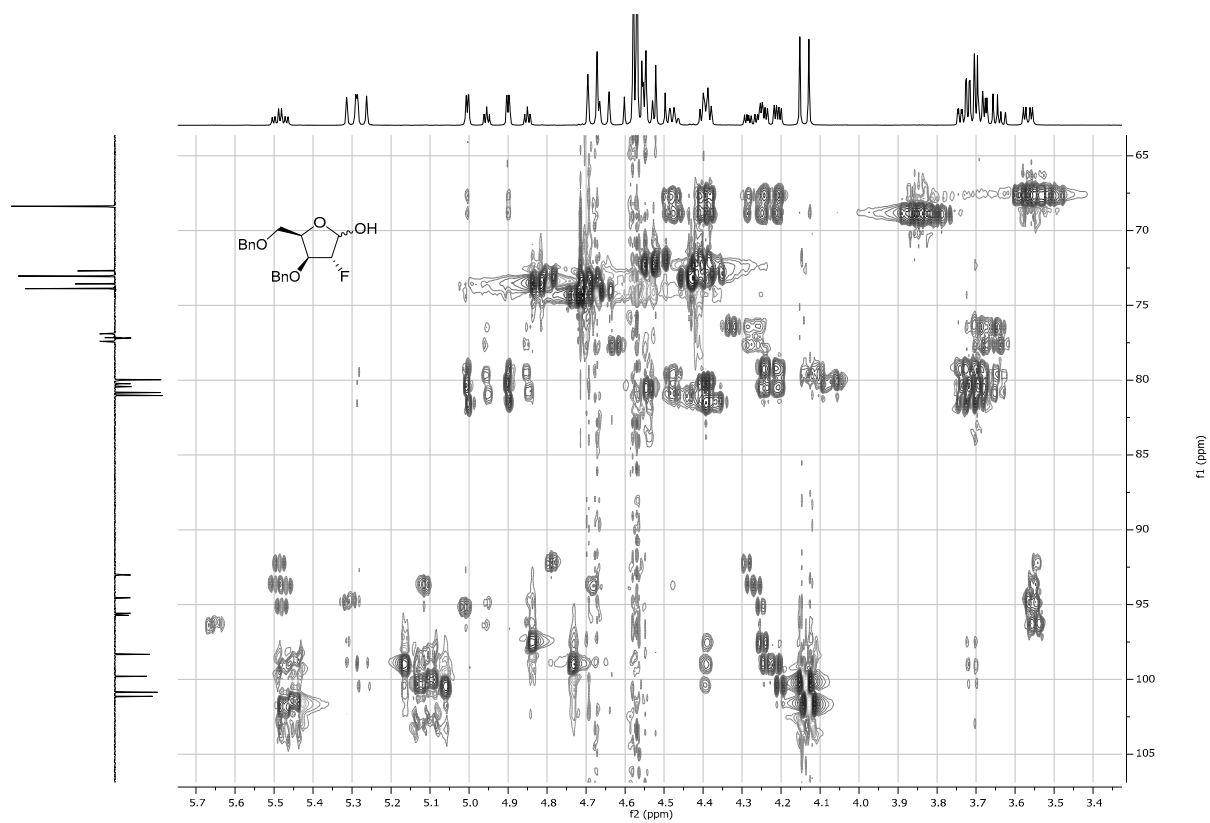

(2-Methyl-2-butyl) 3,5-di-O-benzyl-2-methyl- $\alpha$ -D-ribofuranoside (**52**)

$^1\text{H}$  NMR, 500 MHz,  $\text{CDCl}_3$  of compound **52**

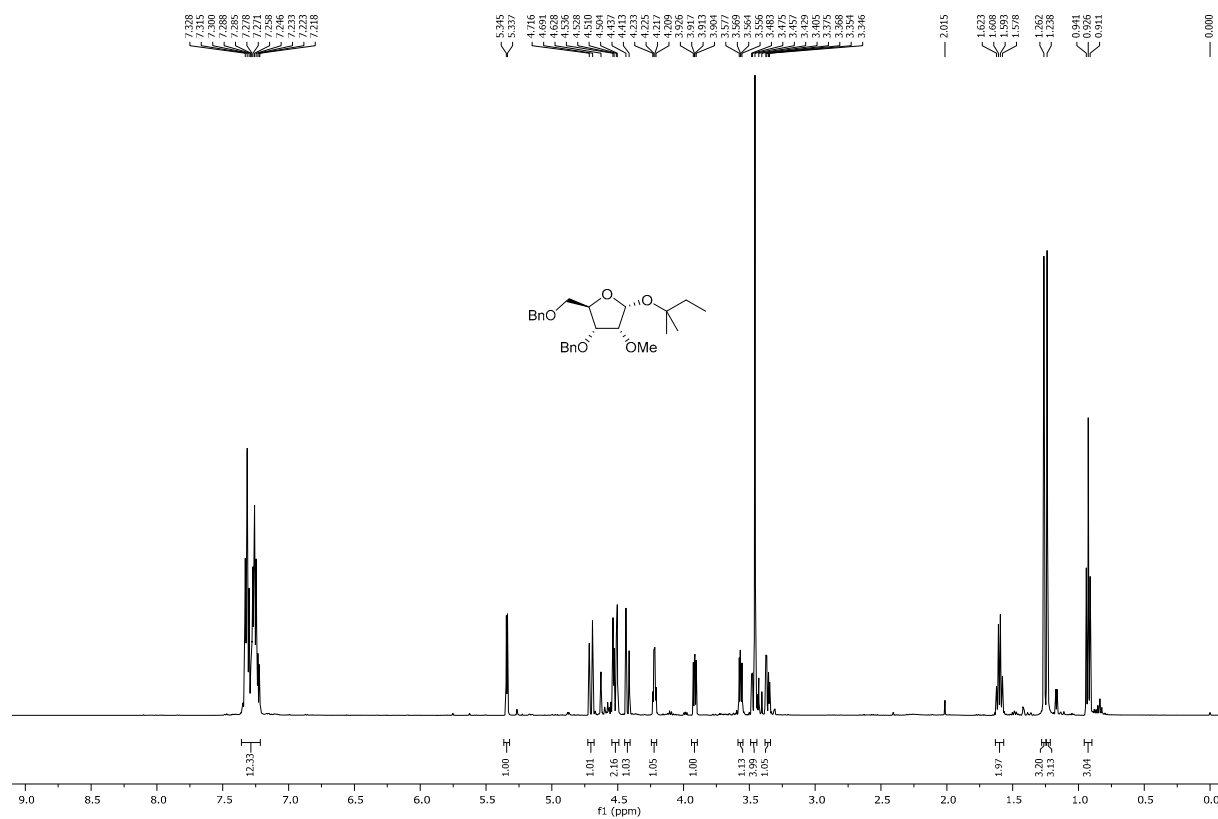

$^{13}\text{C}$ -APT NMR, 126 MHz,  $\text{CDCl}_3$  of compound **52**

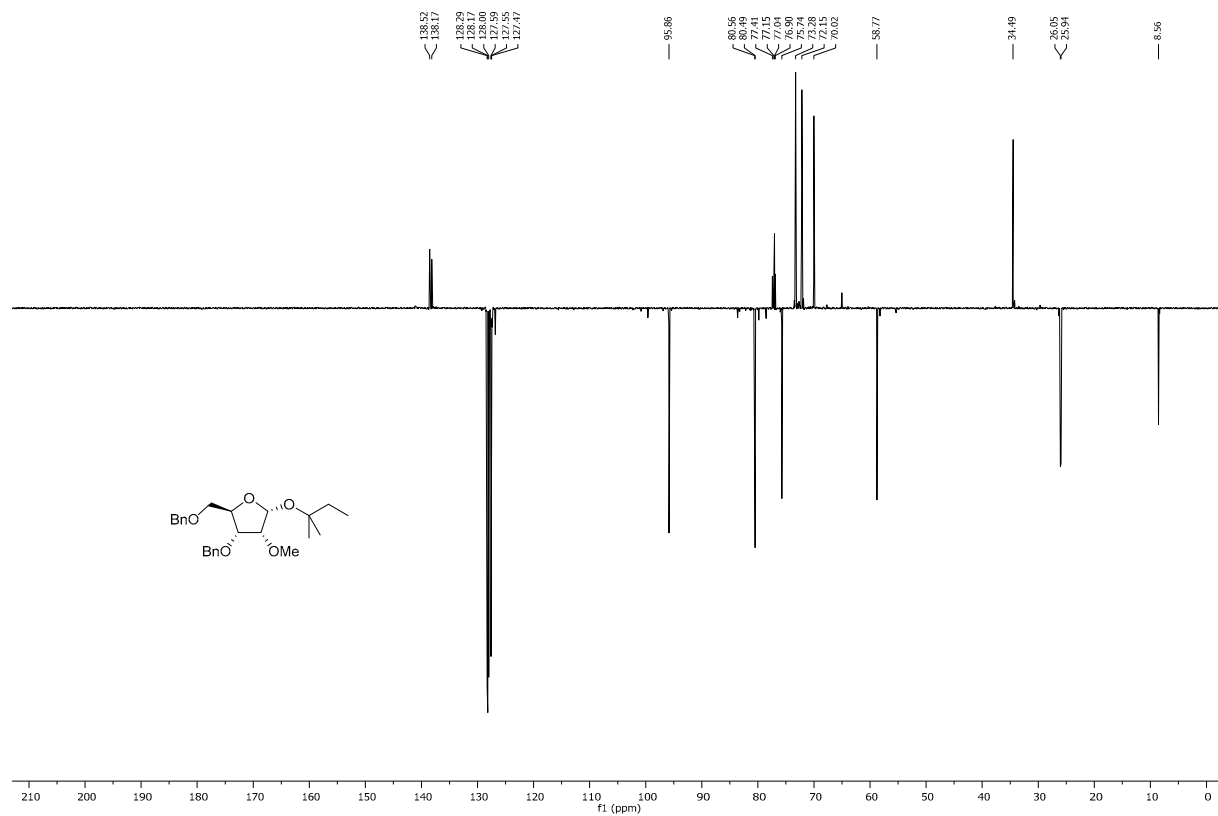

$^1\text{H}$ - $^1\text{H}$  COSY of compound **52**

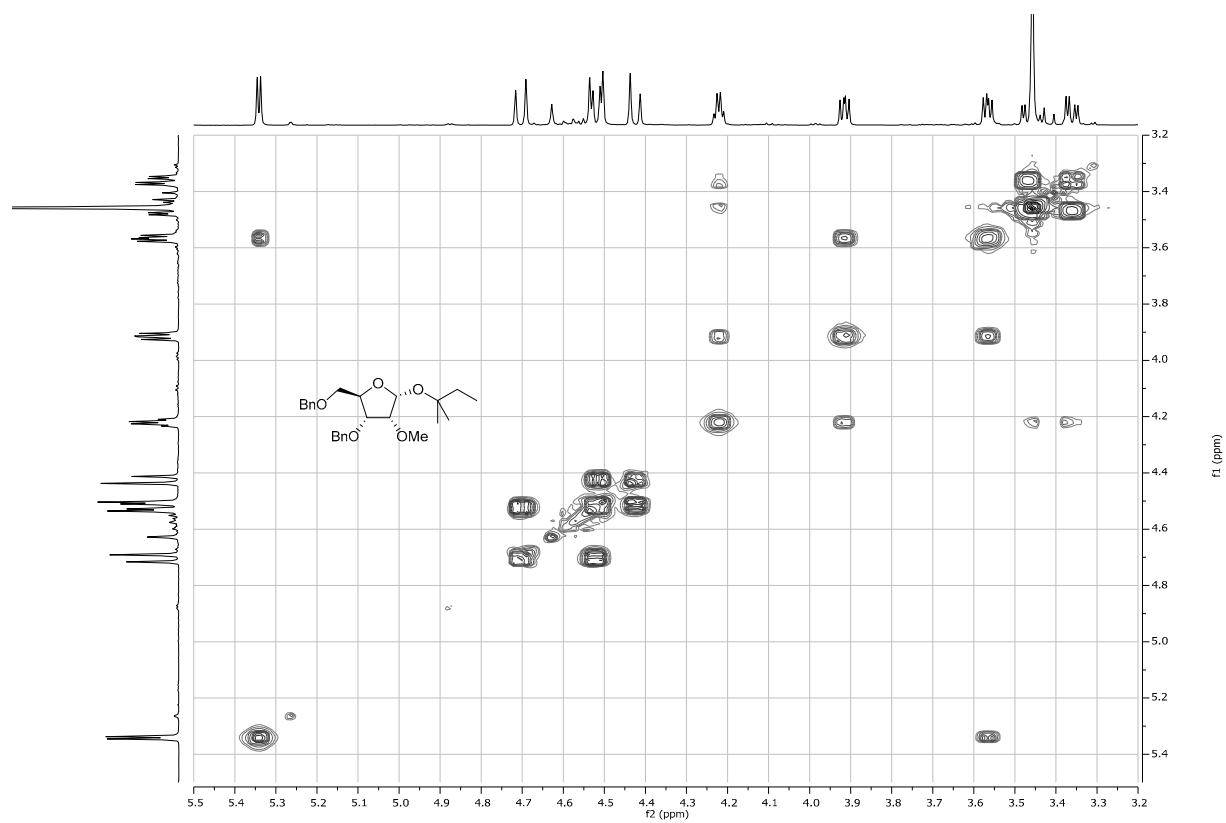

$^1\text{H}$ - $^{13}\text{C}$  HSQC of compound **52**

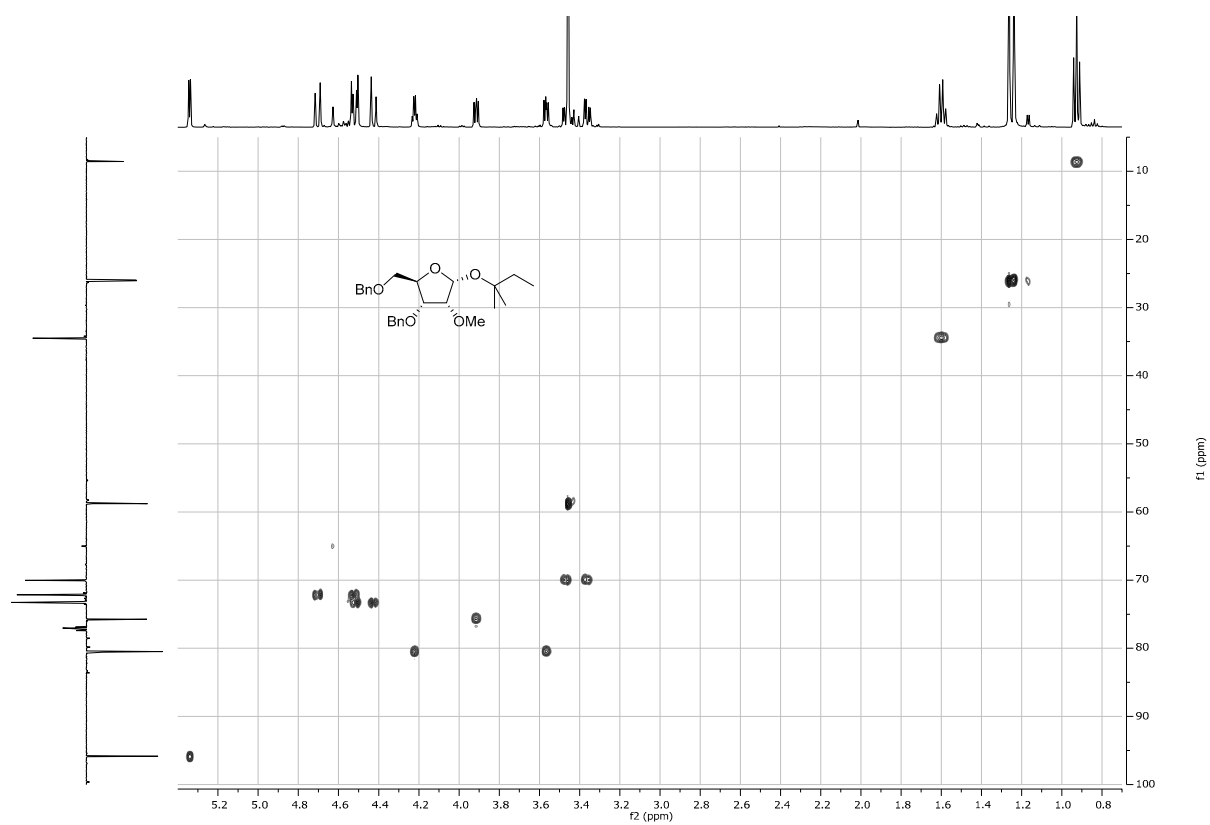

$^1\text{H}$ - $^{13}\text{C}$  HMBC of compound **52**

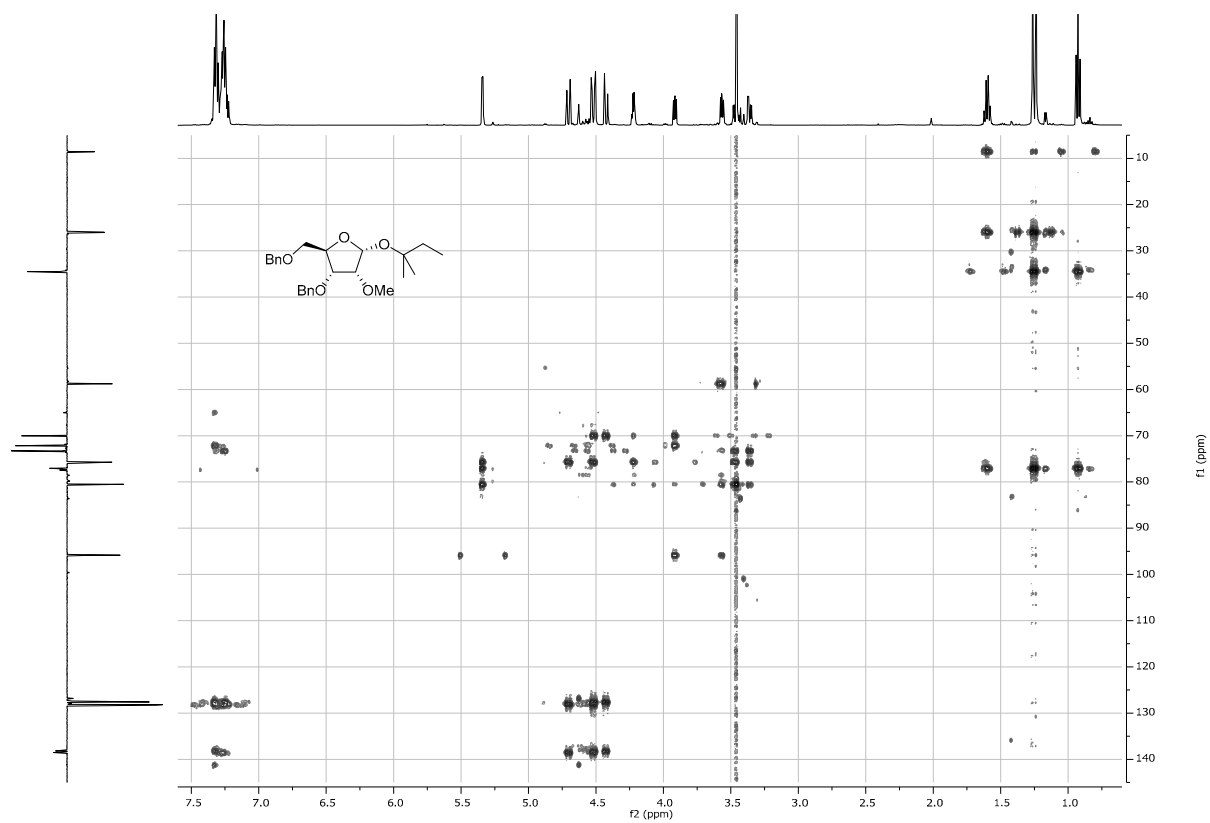

$^1\text{H}$ - $^1\text{H}$  NOESY of compound **52**

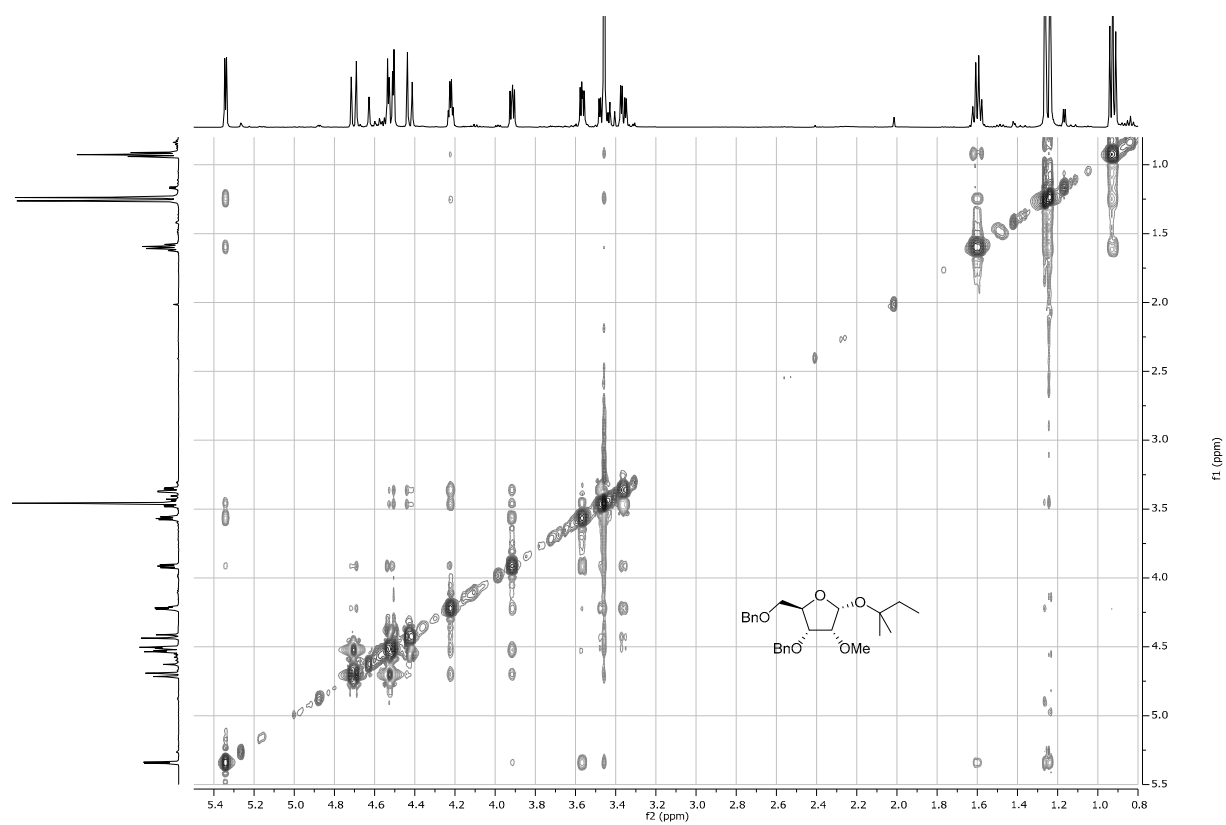

### Methyl 5-azido-2,5-di-O-benzyl-5-deoxy- $\alpha$ -D-lyxofuranoside (**53 $\alpha$** )

$^1\text{H}$  NMR, 400 MHz,  $\text{CDCl}_3$  of compound **53 $\alpha$**

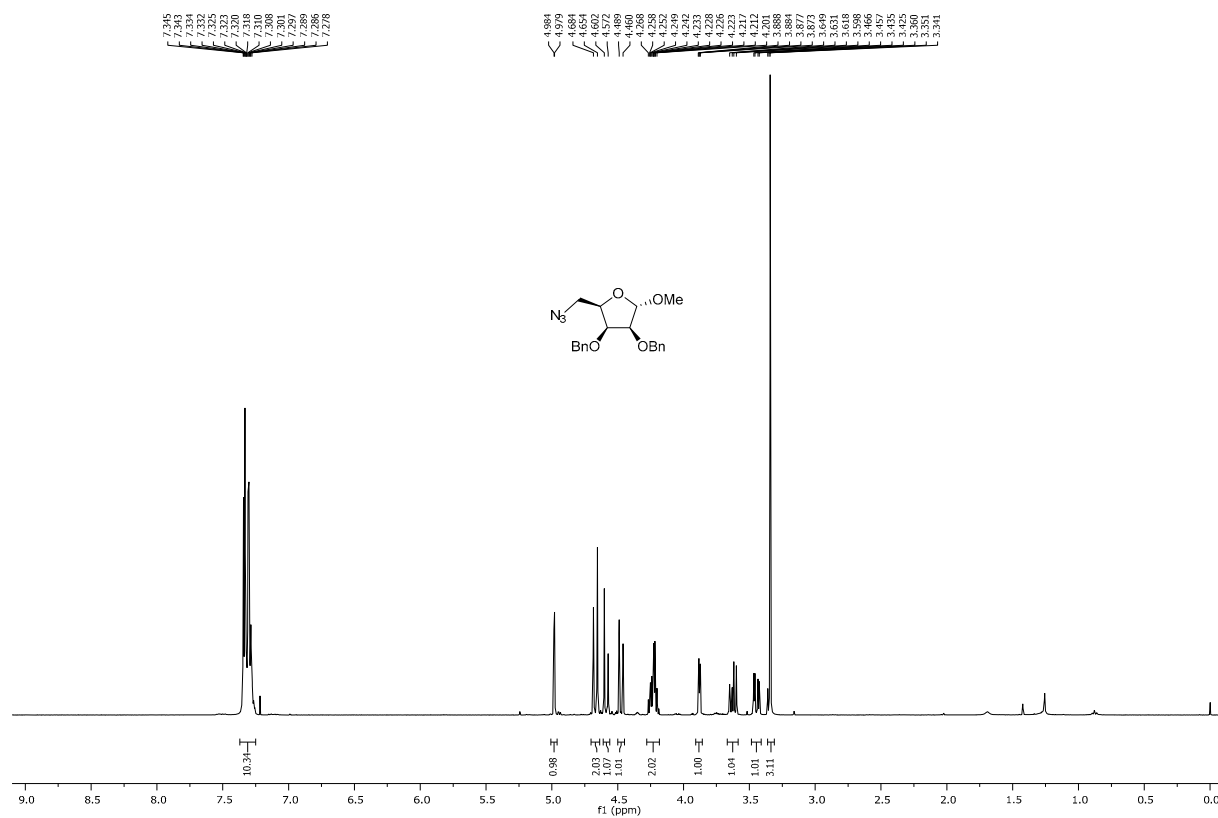

$^{13}\text{C}$ -APT NMR, 101 MHz,  $\text{CDCl}_3$  of compound **53 $\alpha$**

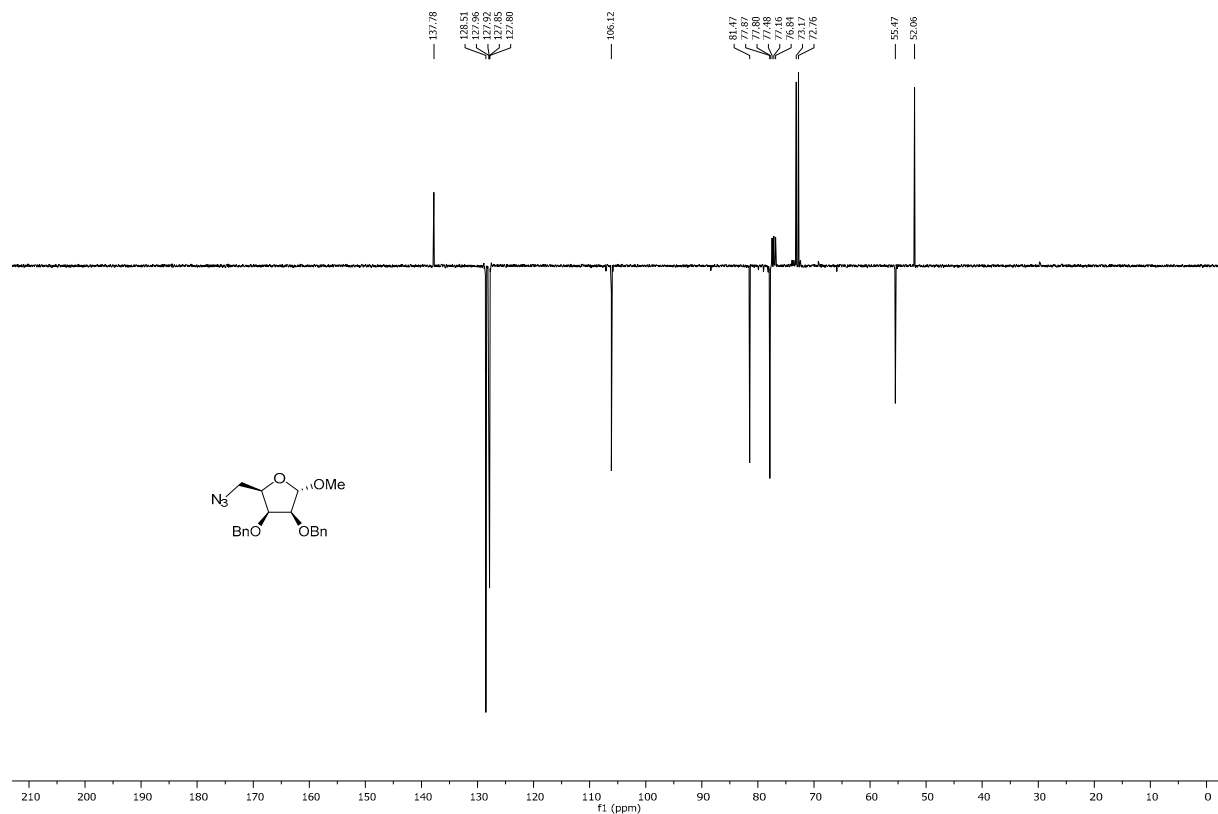

$^1\text{H}$ - $^1\text{H}$  COSY of compound **53 $\alpha$**

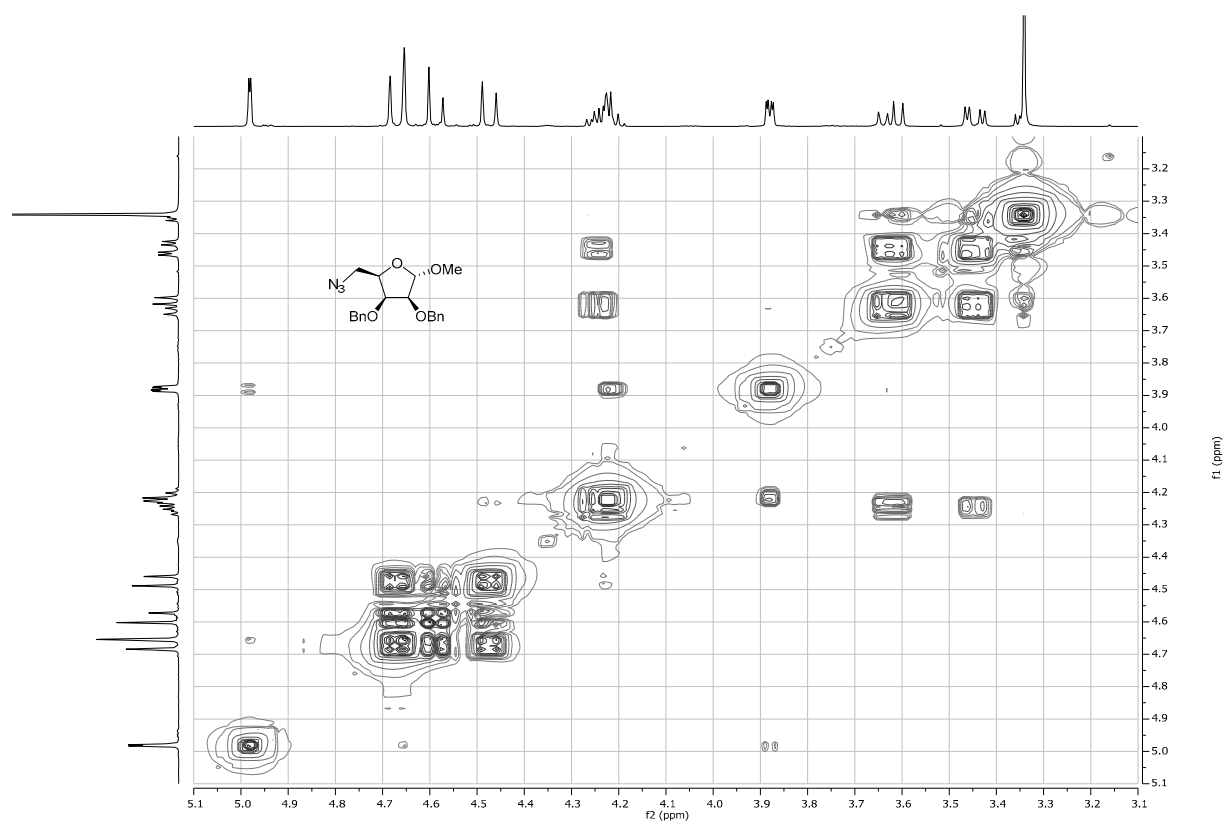

$^1\text{H}$ - $^{13}\text{C}$  HSQC of compound **53 $\alpha$**

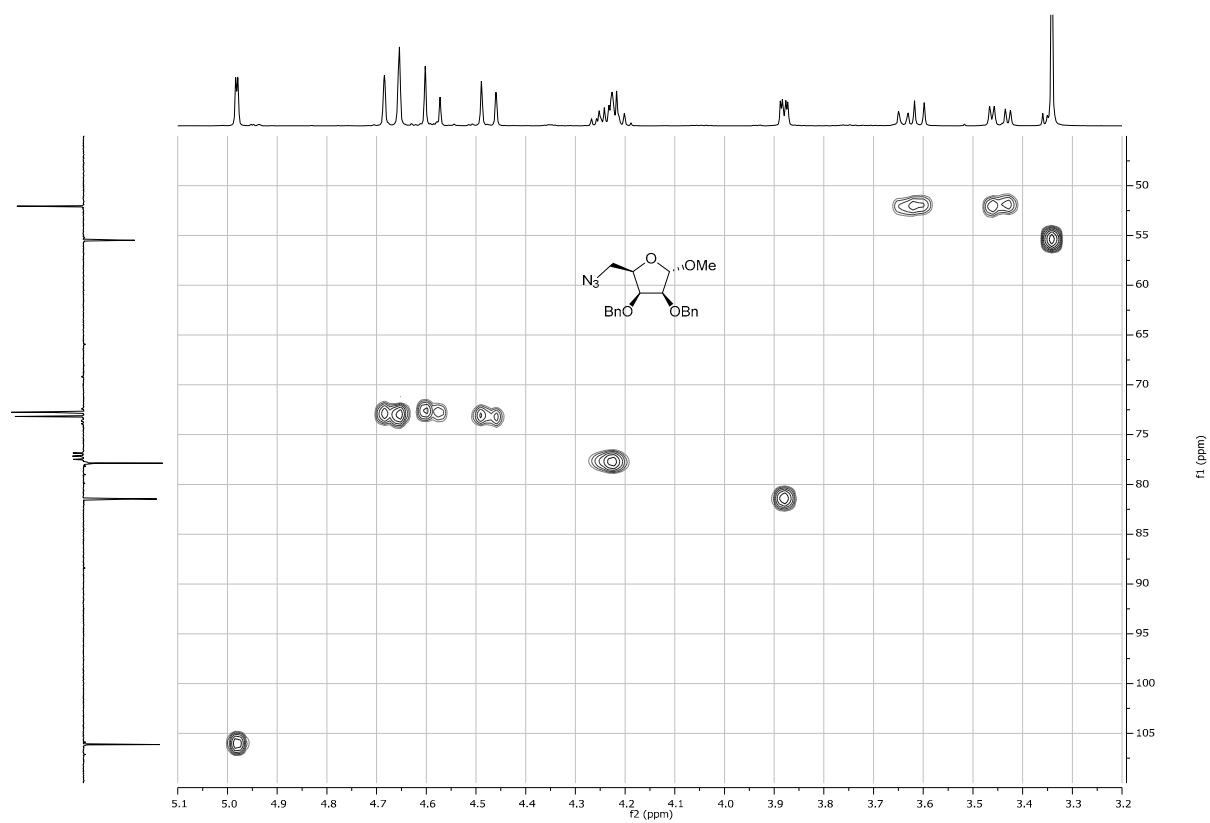

$^1\text{H}$ - $^{13}\text{C}$  HMBC of compound **53 $\alpha$**

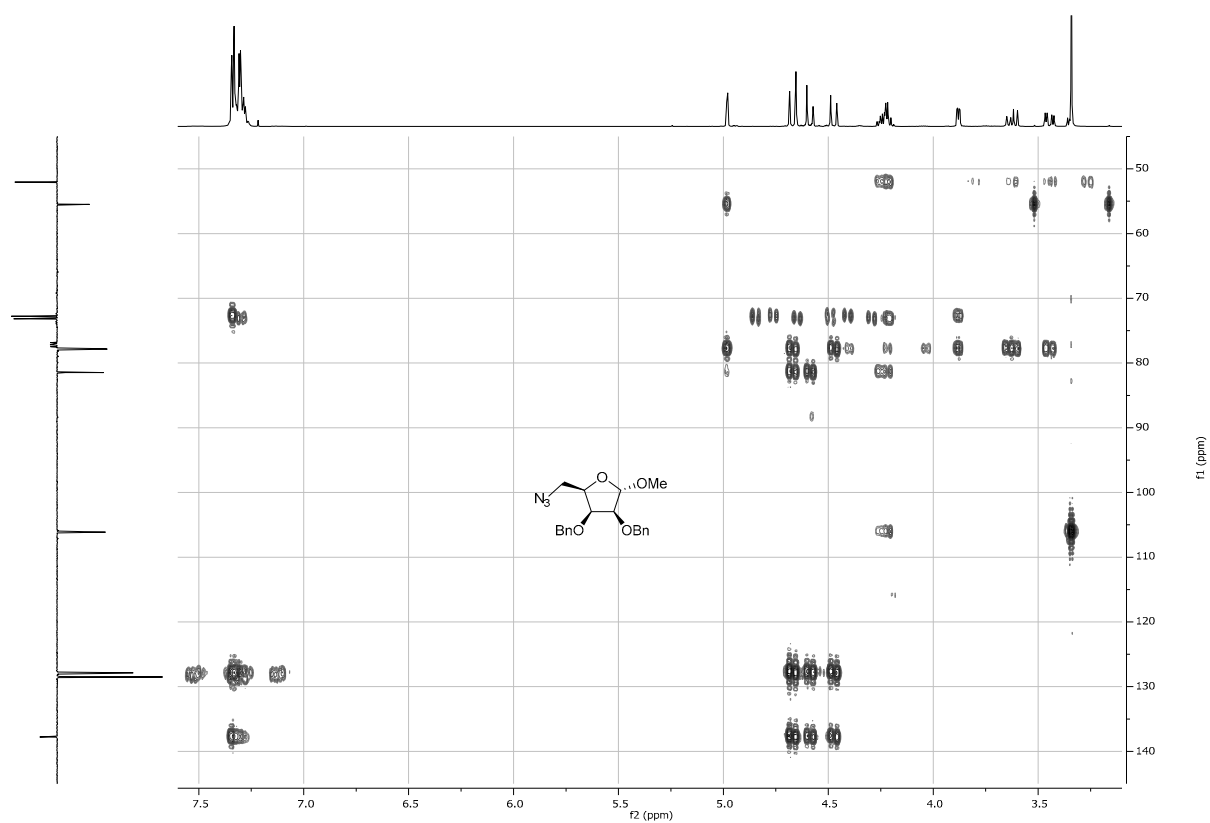

$^1\text{H}$ - $^{13}\text{C}$  HSQC-HECADE of compound **53 $\alpha$**

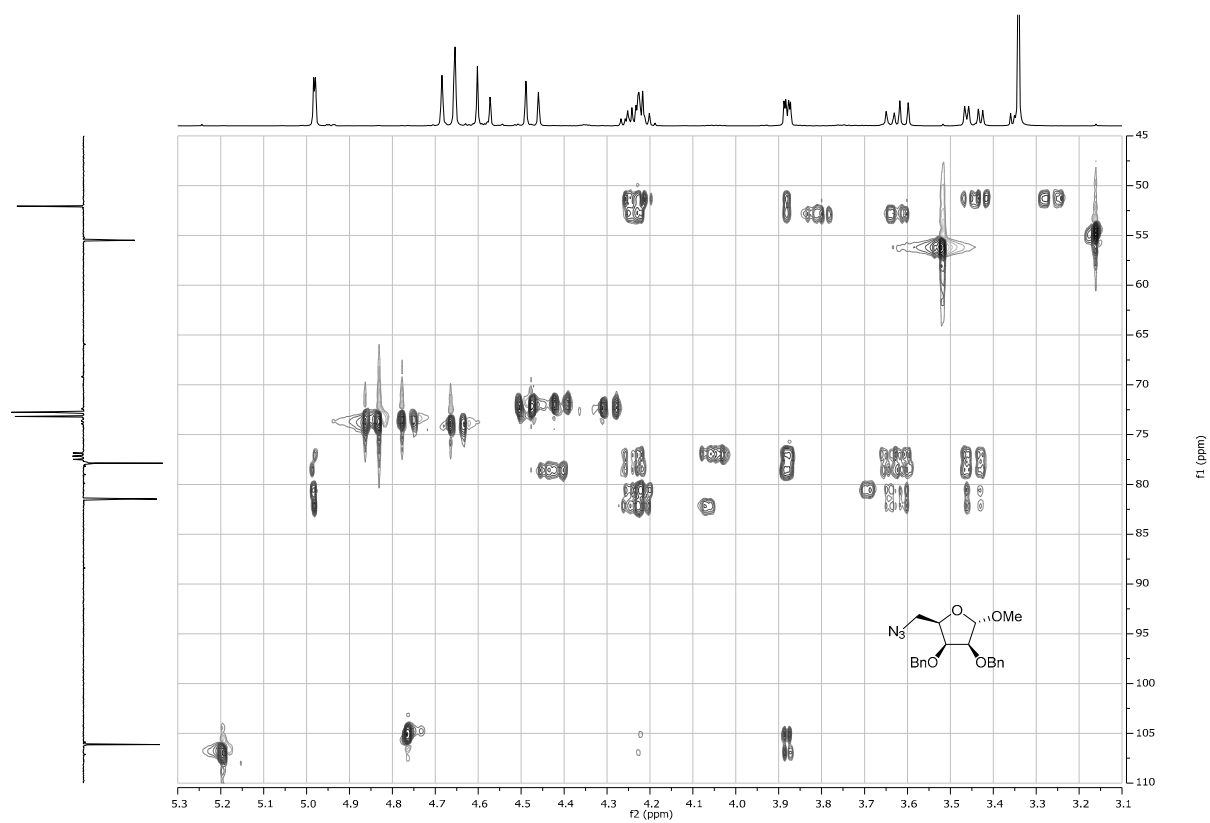

# Methyl 5-azido-2,5-di-O-benzyl-5-deoxy-β-D-lyxofuranoside (53β)

<sup>1</sup>H NMR, 400 MHz, CDCl<sub>3</sub> of compound 53β

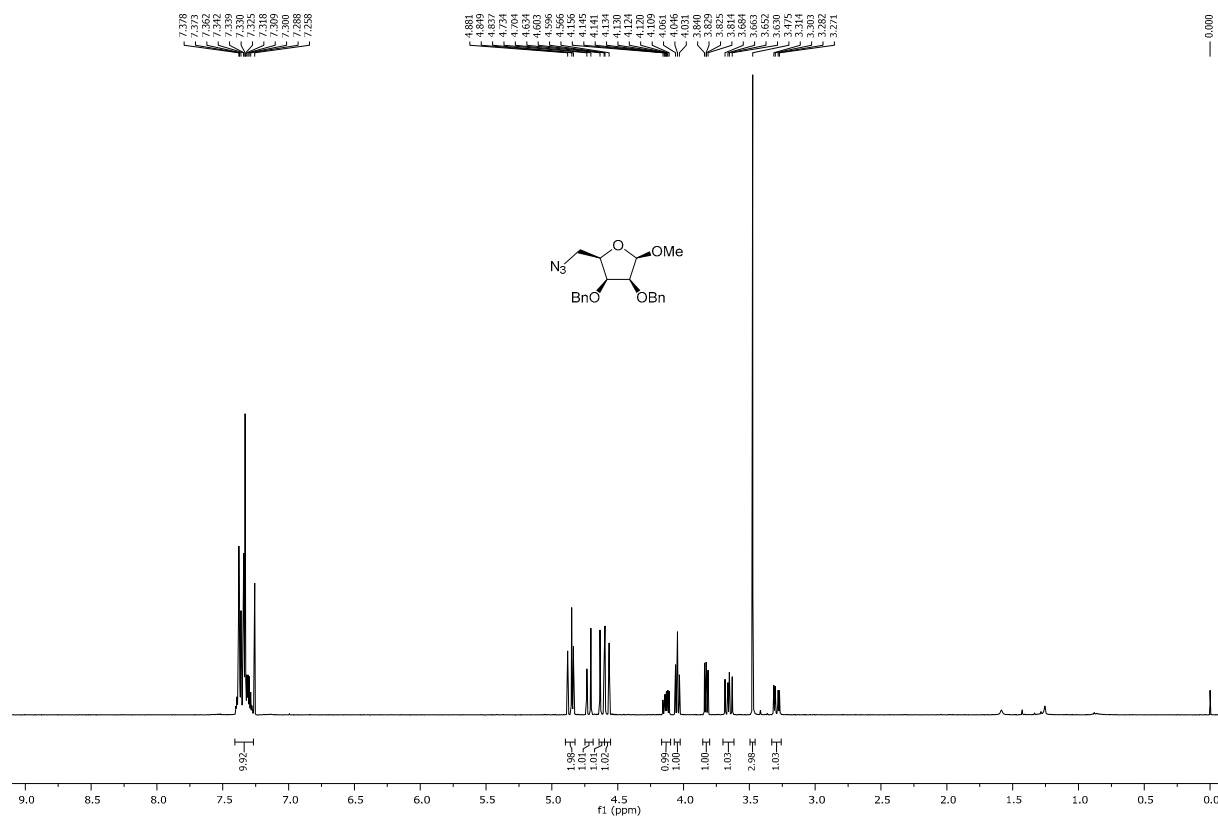

<sup>13</sup>C-APT NMR, 101 MHz, CDCl<sub>3</sub> of compound 53β

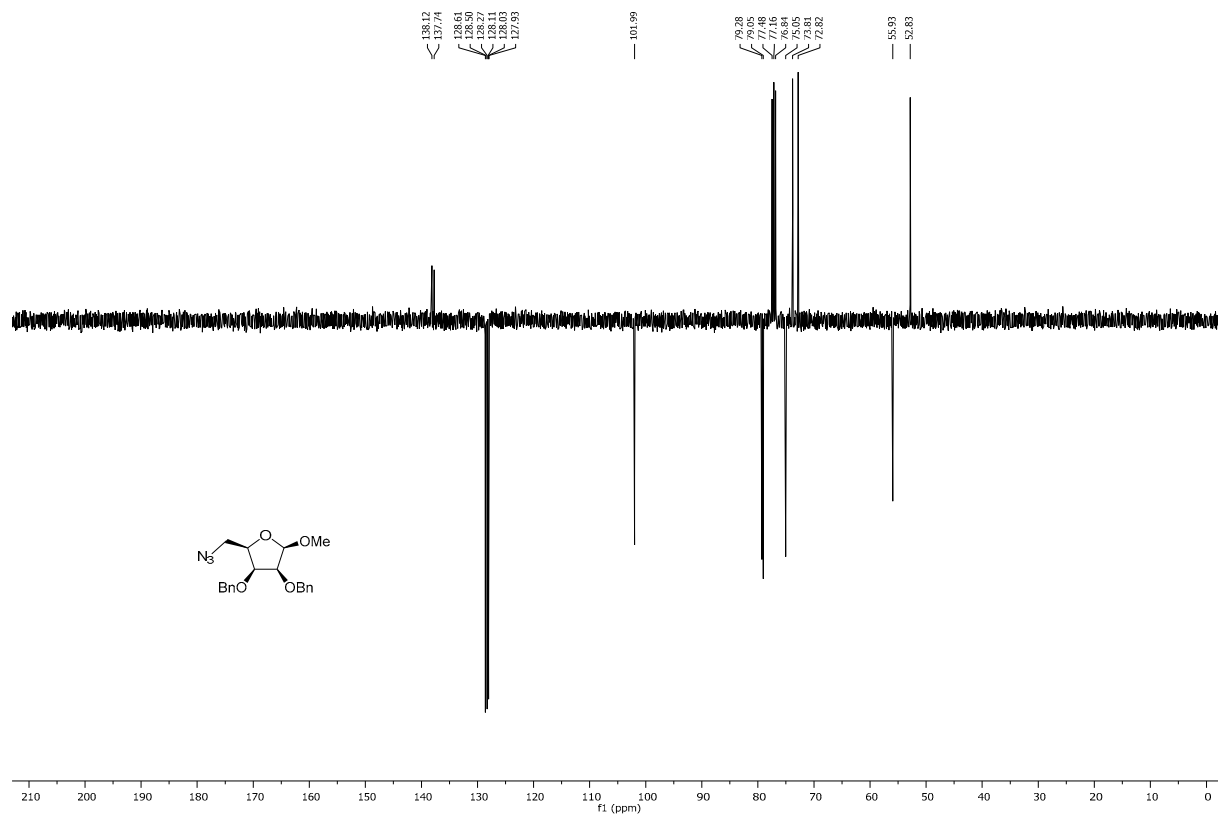



$^1\text{H}$ - $^1\text{H}$  COSY of compound **53 $\beta$**

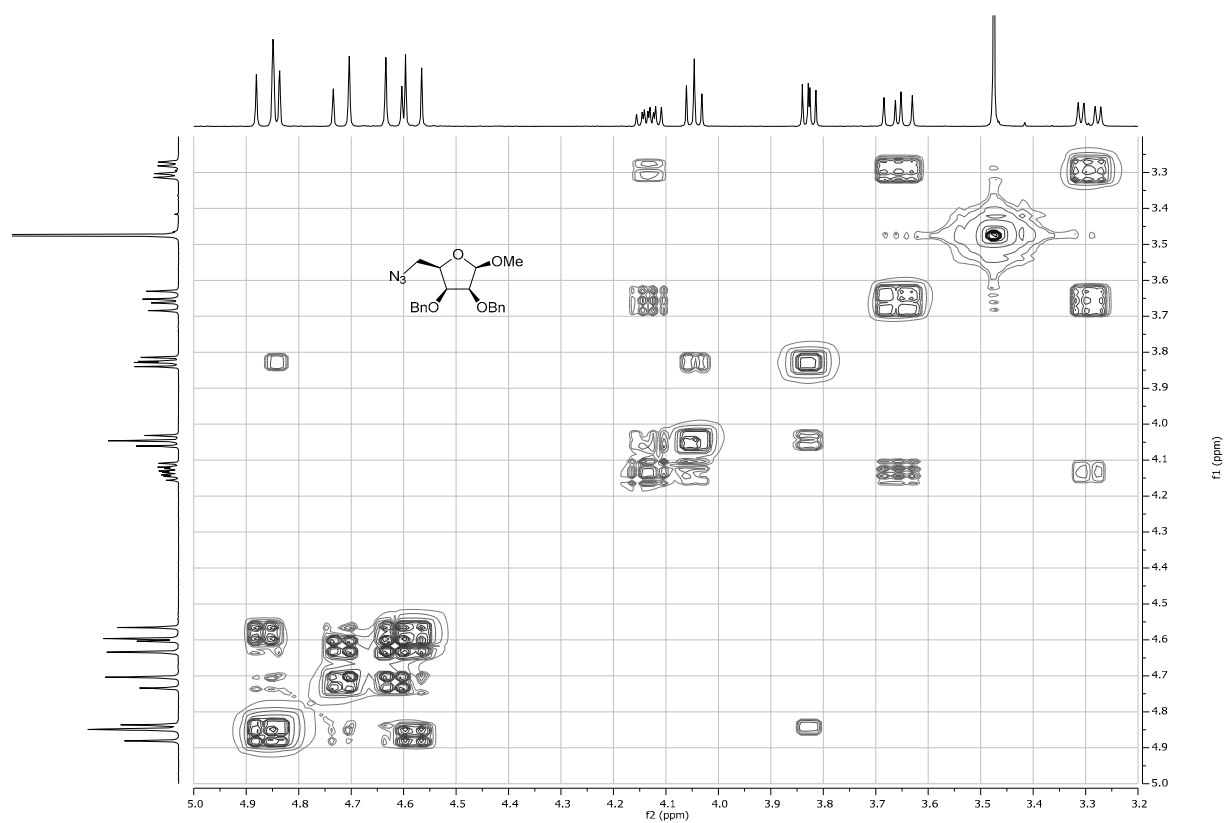

$^1\text{H}$ - $^{13}\text{C}$  HSQC of compound **53 $\beta$**

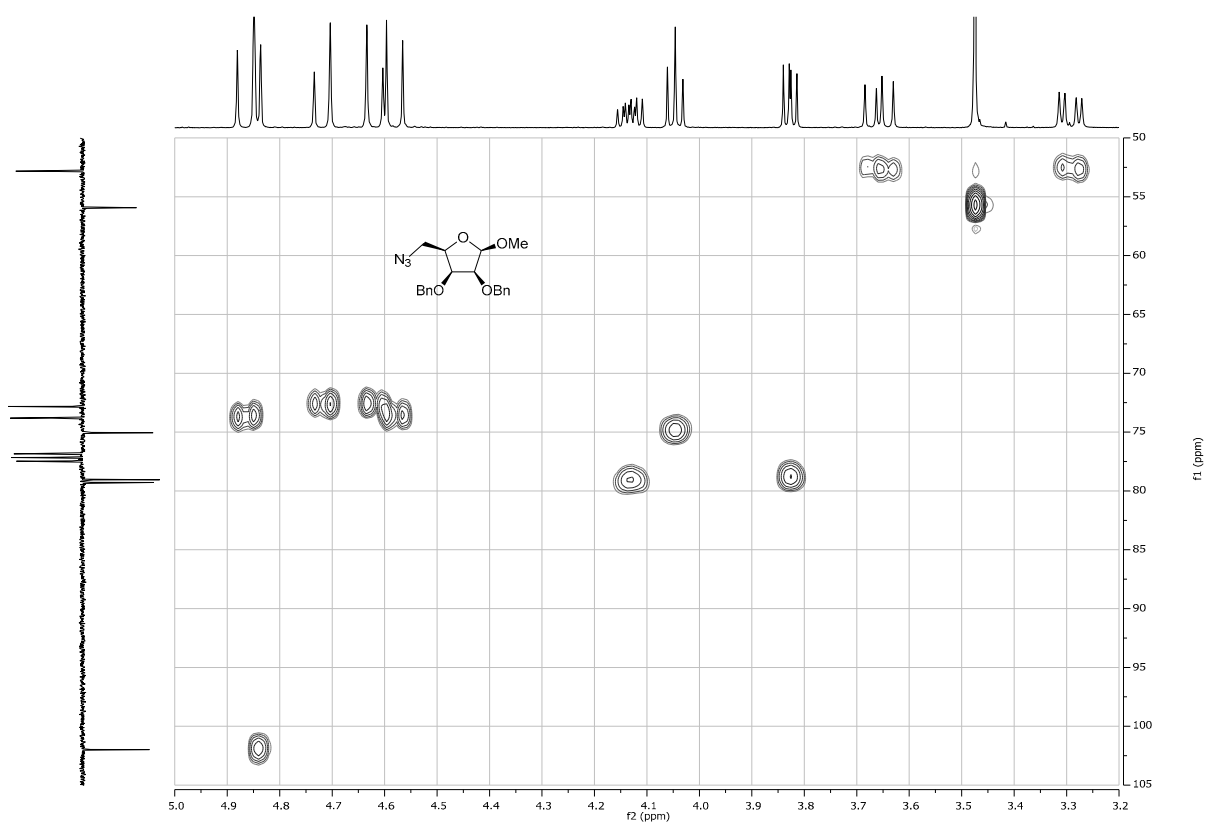

$^1\text{H}$ - $^{13}\text{C}$  HMBC of compound **53 $\beta$**

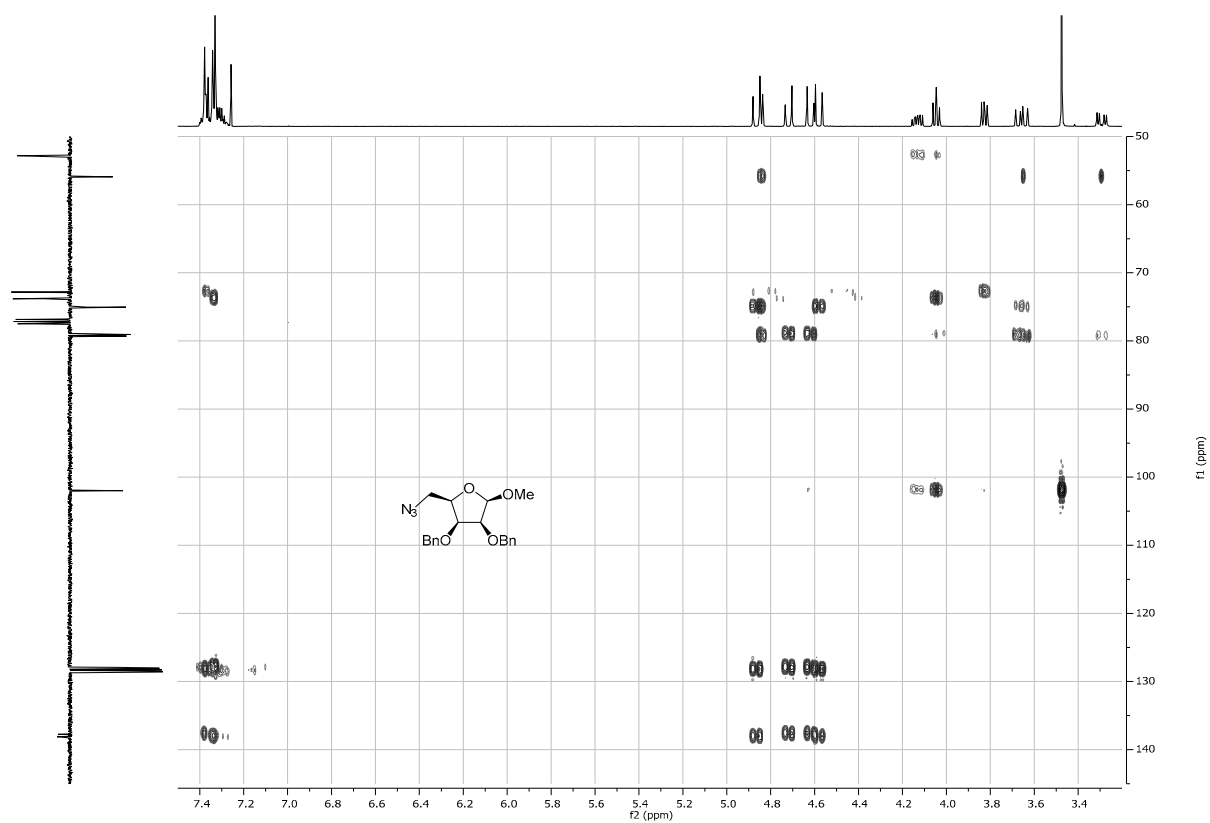

$^1\text{H}$ - $^1\text{H}$  NOESY of compound **53 $\beta$**

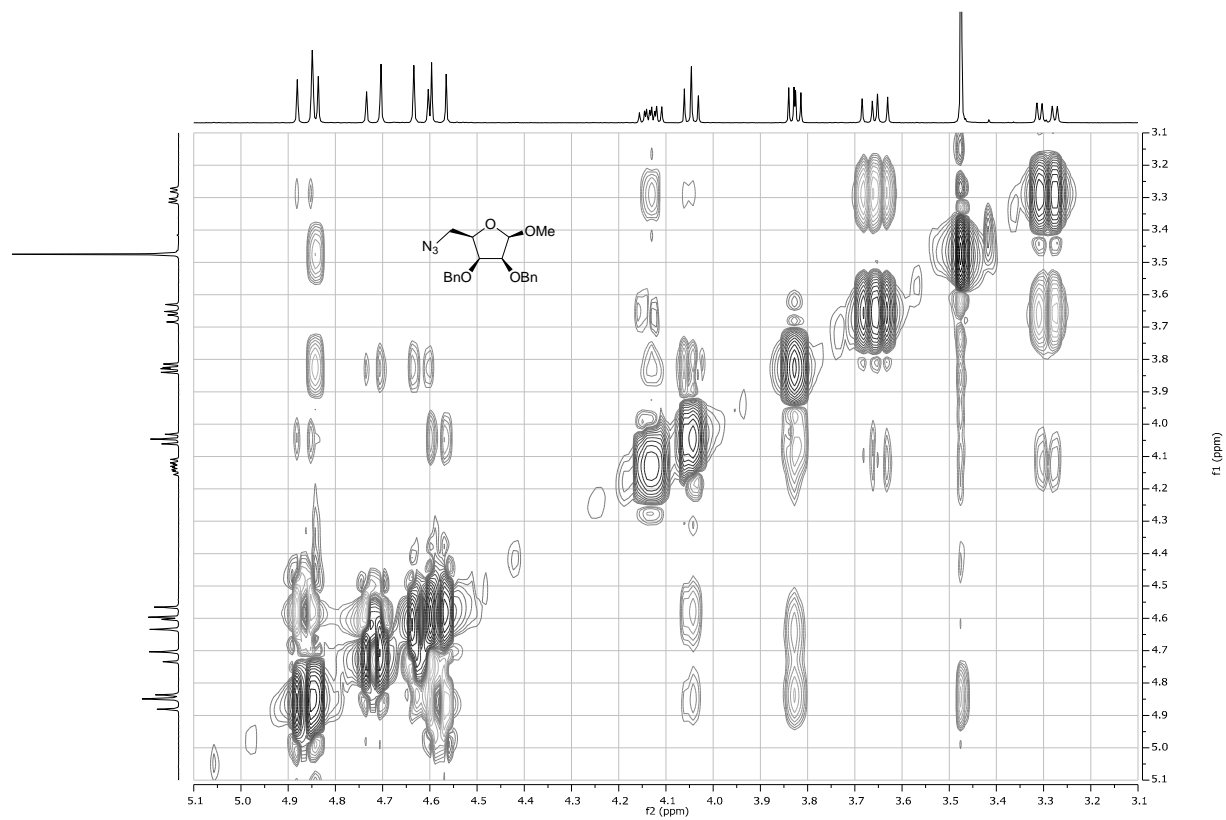



$^{19}\text{F}$ -decoupled  $^1\text{H}$  NMR, (-228 ppm)

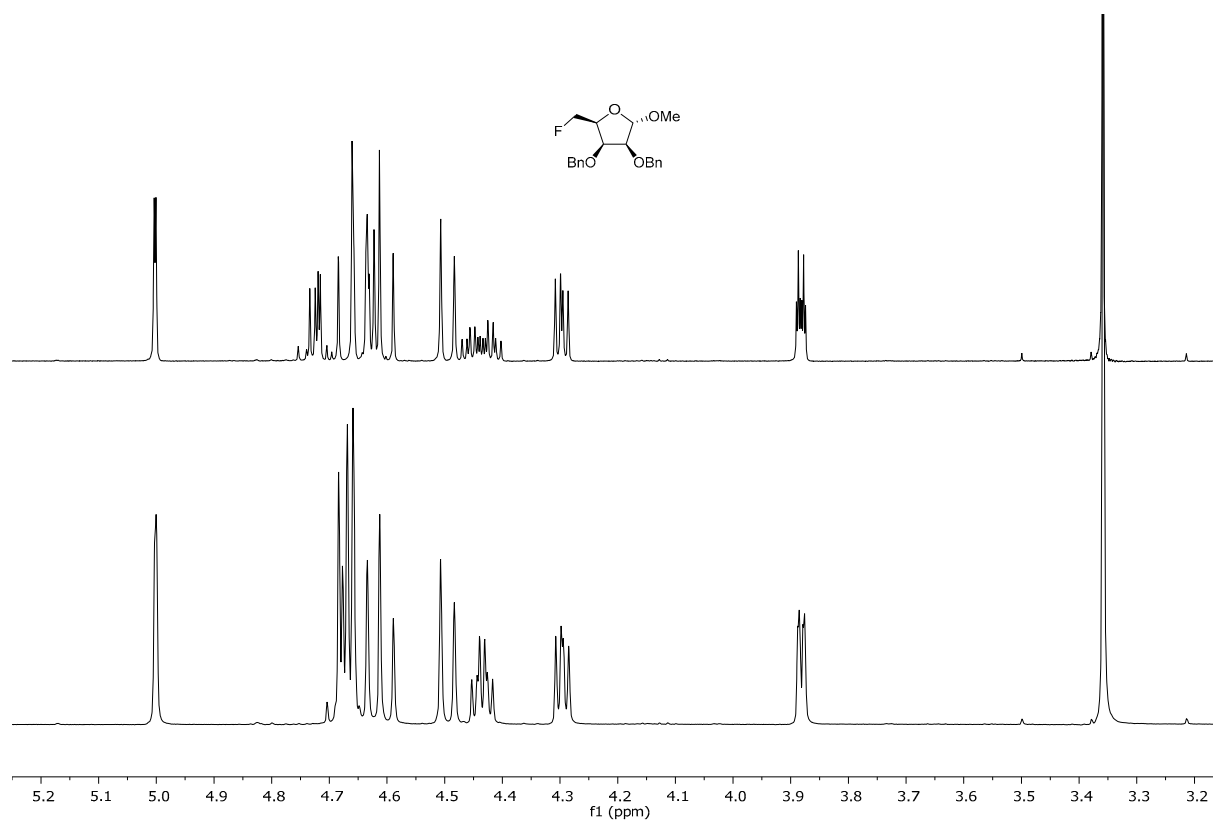

$^{13}\text{C}$ -APT NMR, 126 MHz,  $\text{CDCl}_3$  of compound **54 $\alpha$**

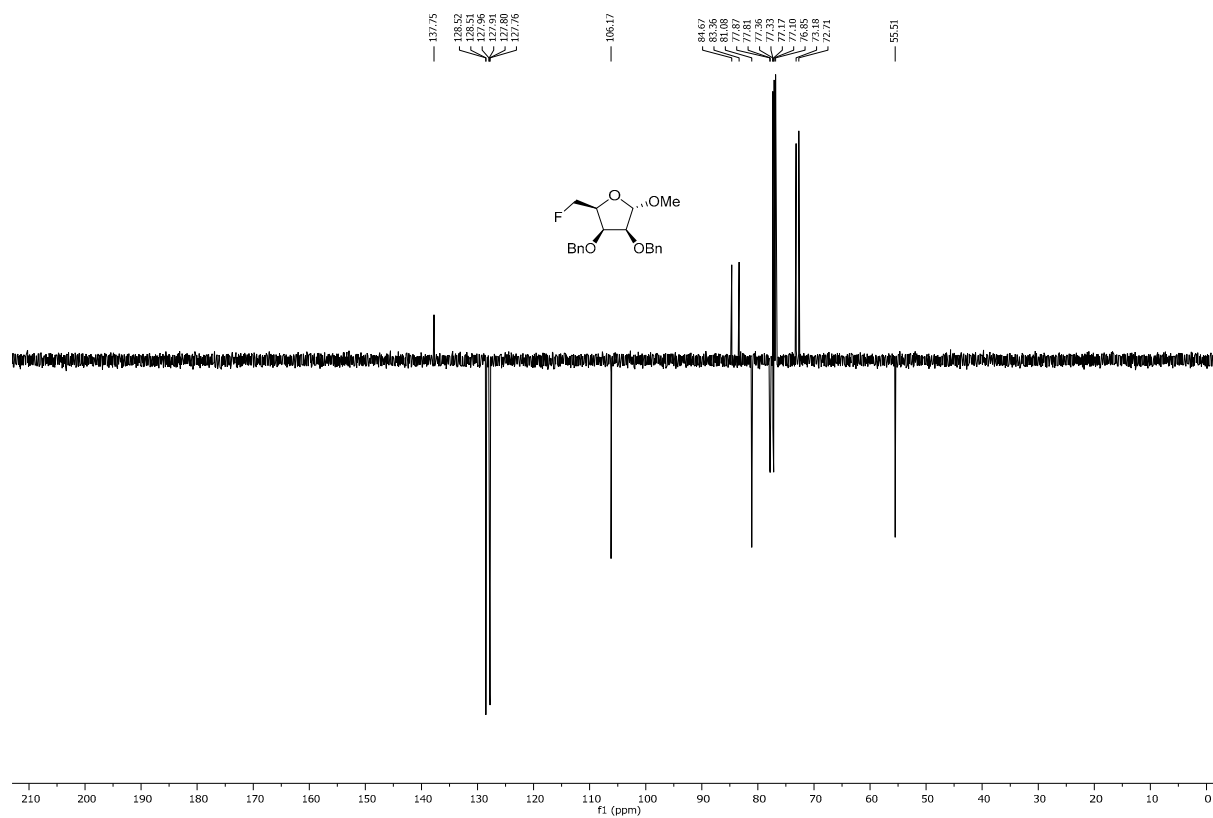

$^{19}\text{F}$  NMR, 471 MHz,  $\text{CDCl}_3$  of compound **54 $\alpha$**

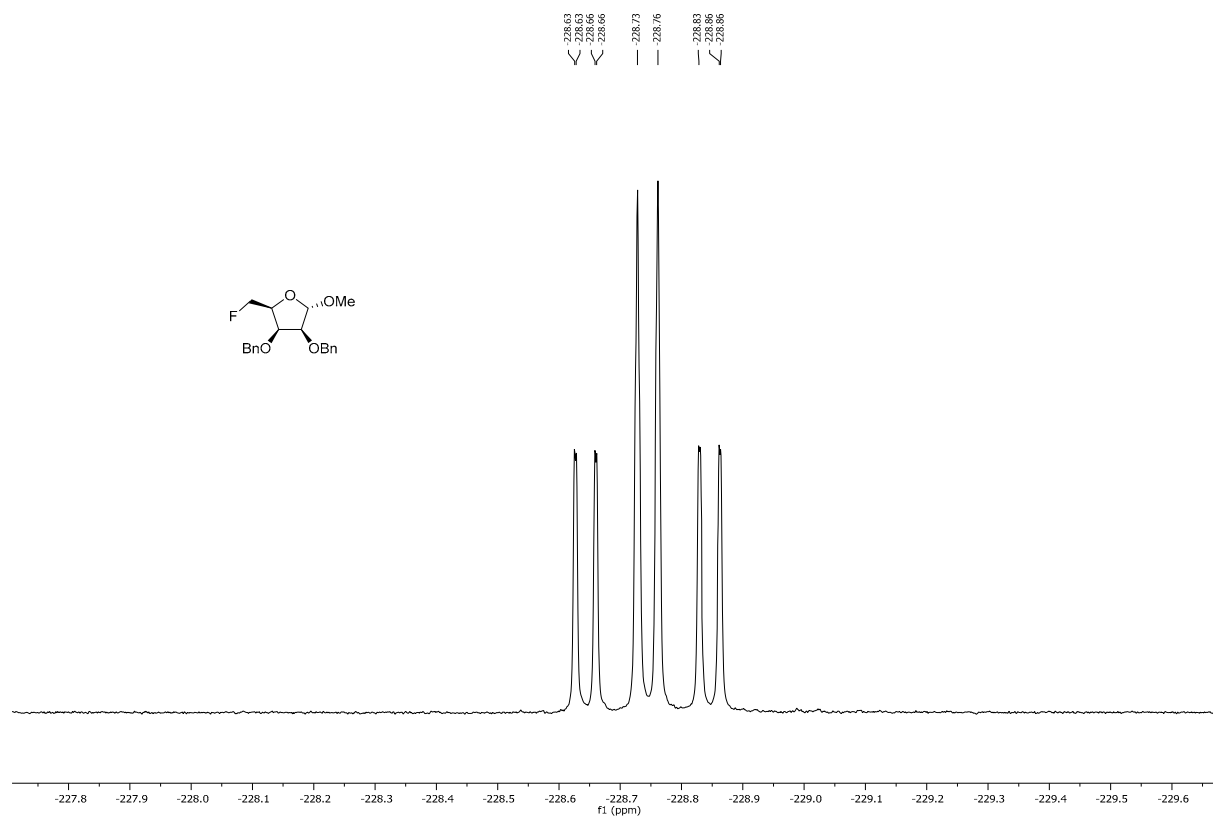

$^1\text{H}$ - $^1\text{H}$  COSY of compound **54 $\alpha$**

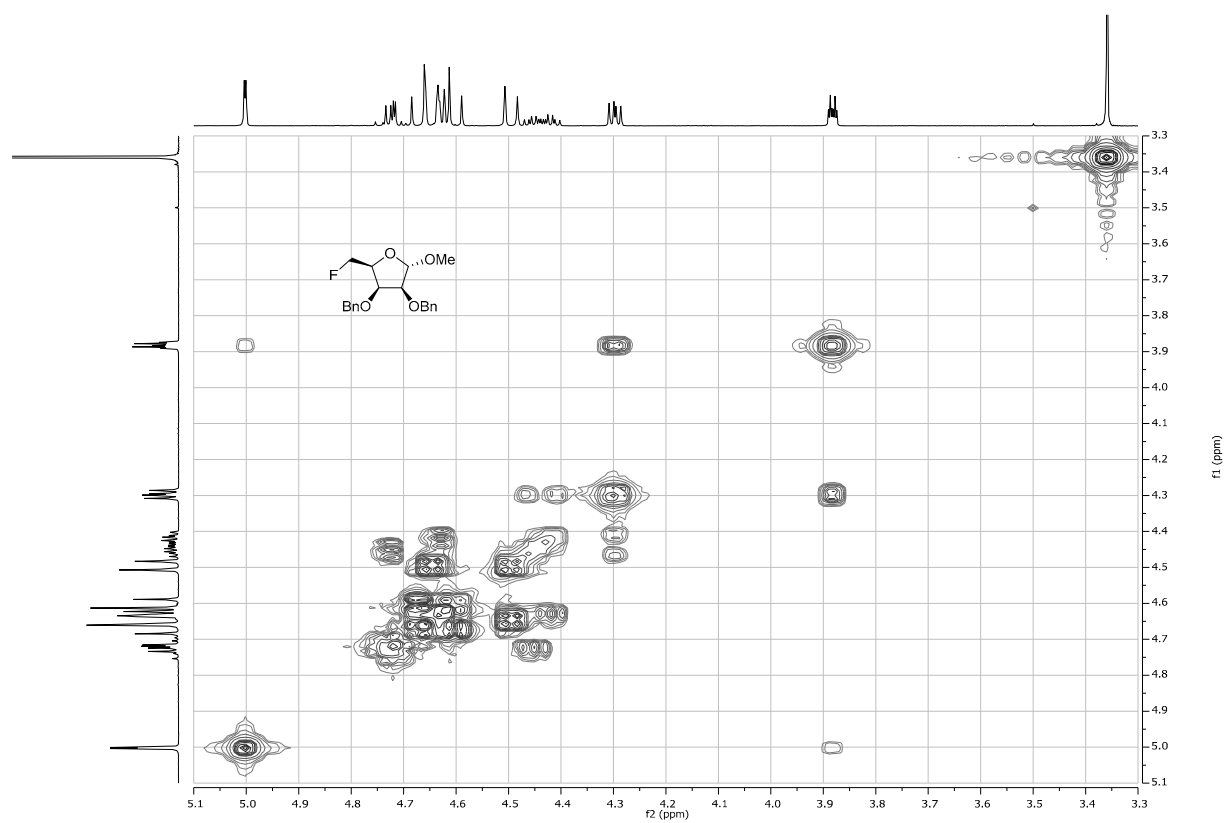

$^1\text{H}$ - $^{13}\text{C}$  HSQC of compound **54 $\alpha$**

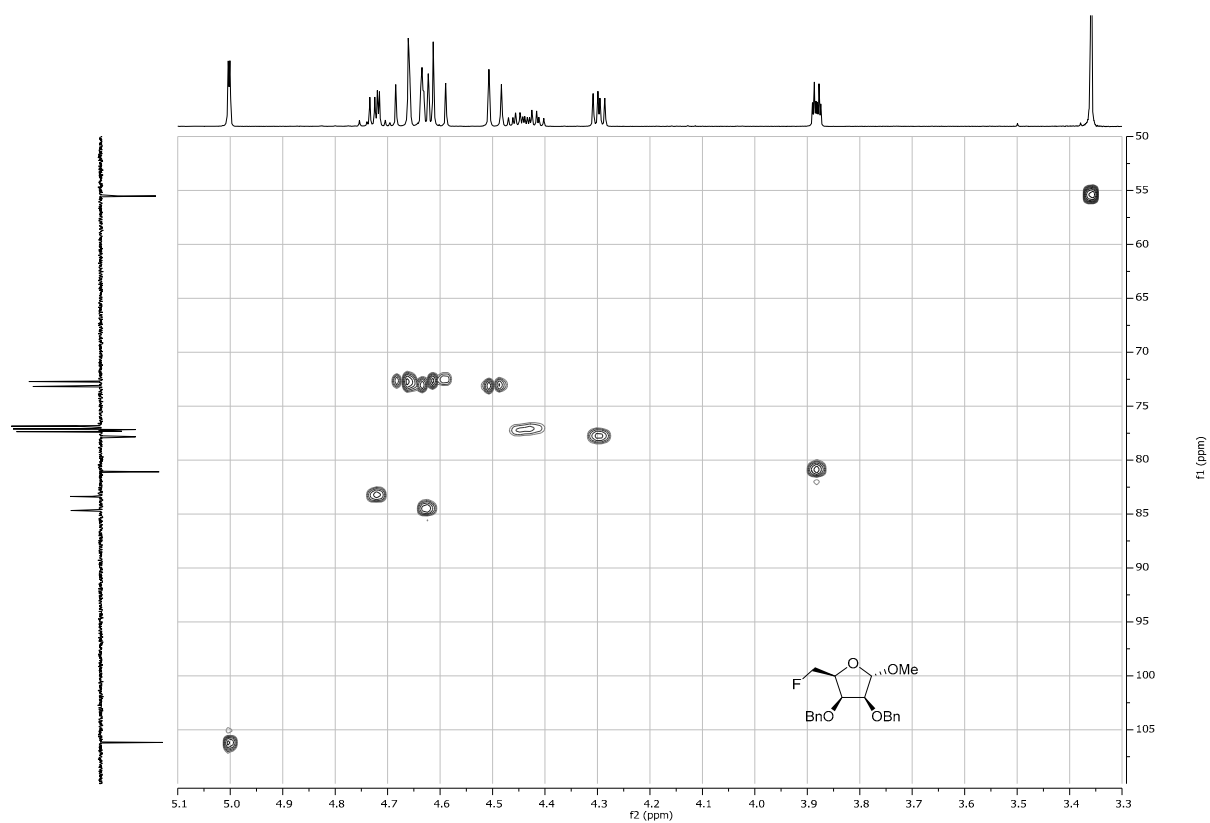

$^1\text{H}$ - $^{13}\text{C}$  HMBC of compound **54 $\alpha$**

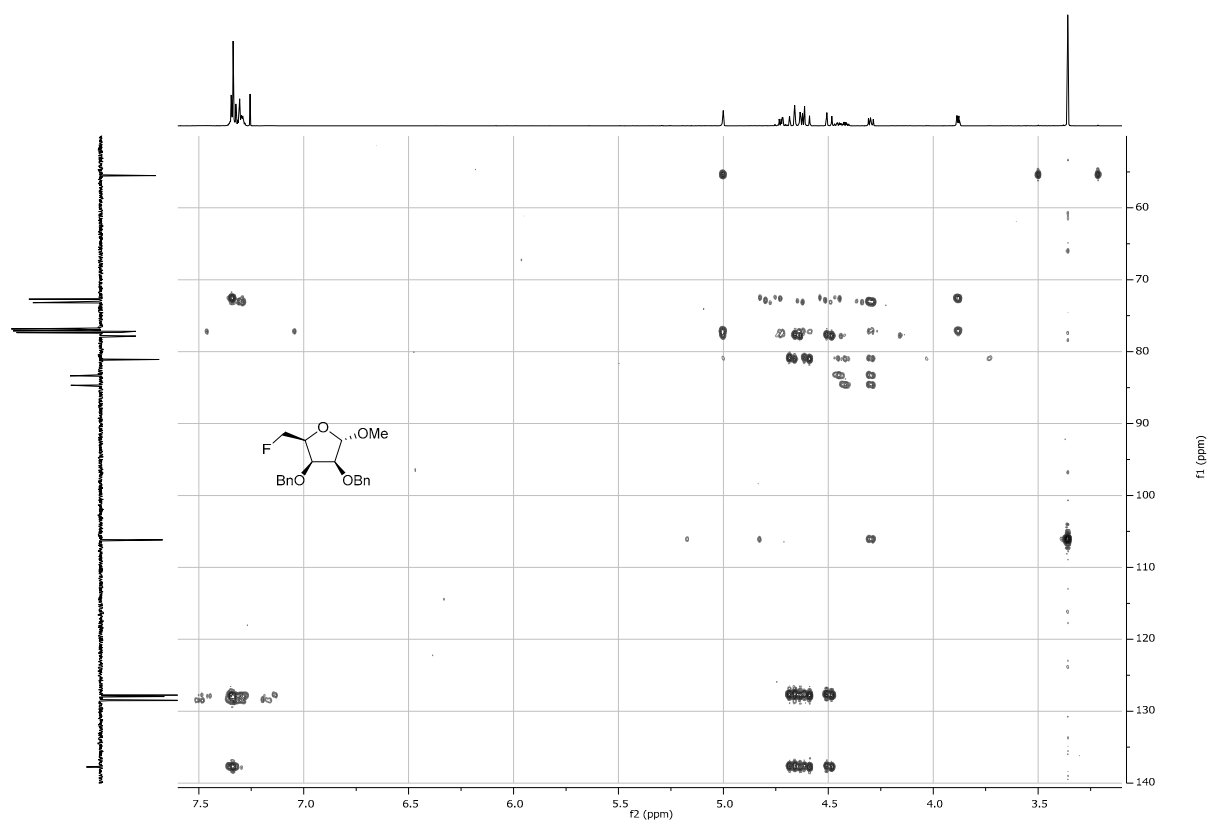

$^1\text{H}$ - $^1\text{H}$  NOESY of compound **54 $\alpha$**

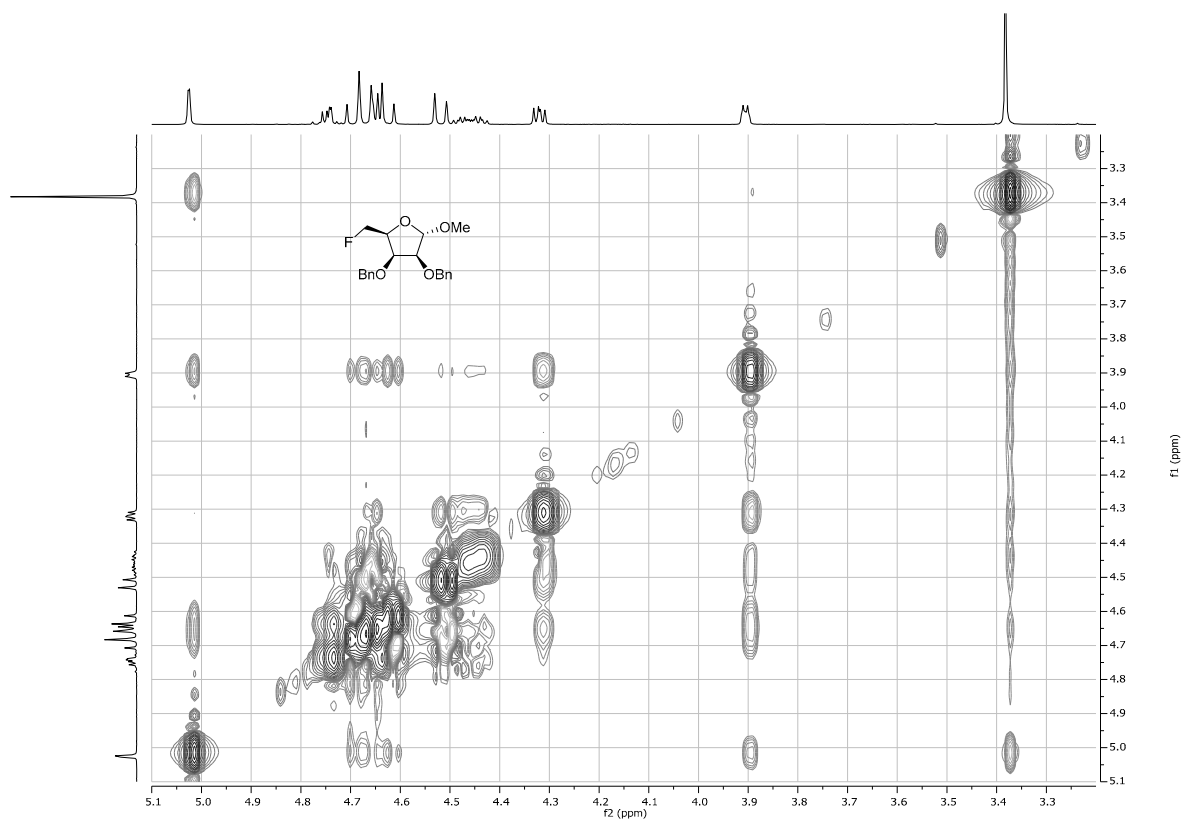

$^1\text{H}$ - $^{13}\text{C}$  HSQC-HECADE of compound **54 $\alpha$**

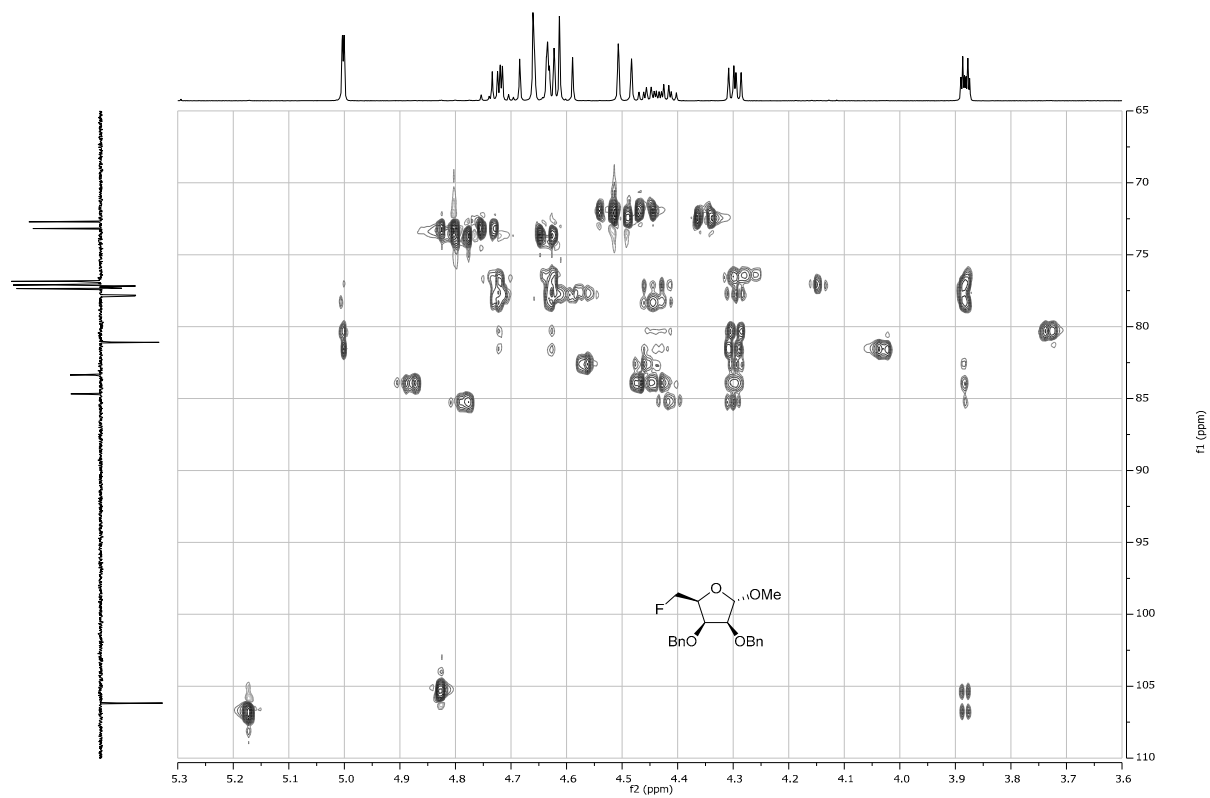

# Methyl 2,5-di-O-benzyl-5-deoxy-5-fluoro-β-D-lyxofuranoside (54β)

<sup>1</sup>H NMR, 500 MHz, CDCl<sub>3</sub> of compound 54β

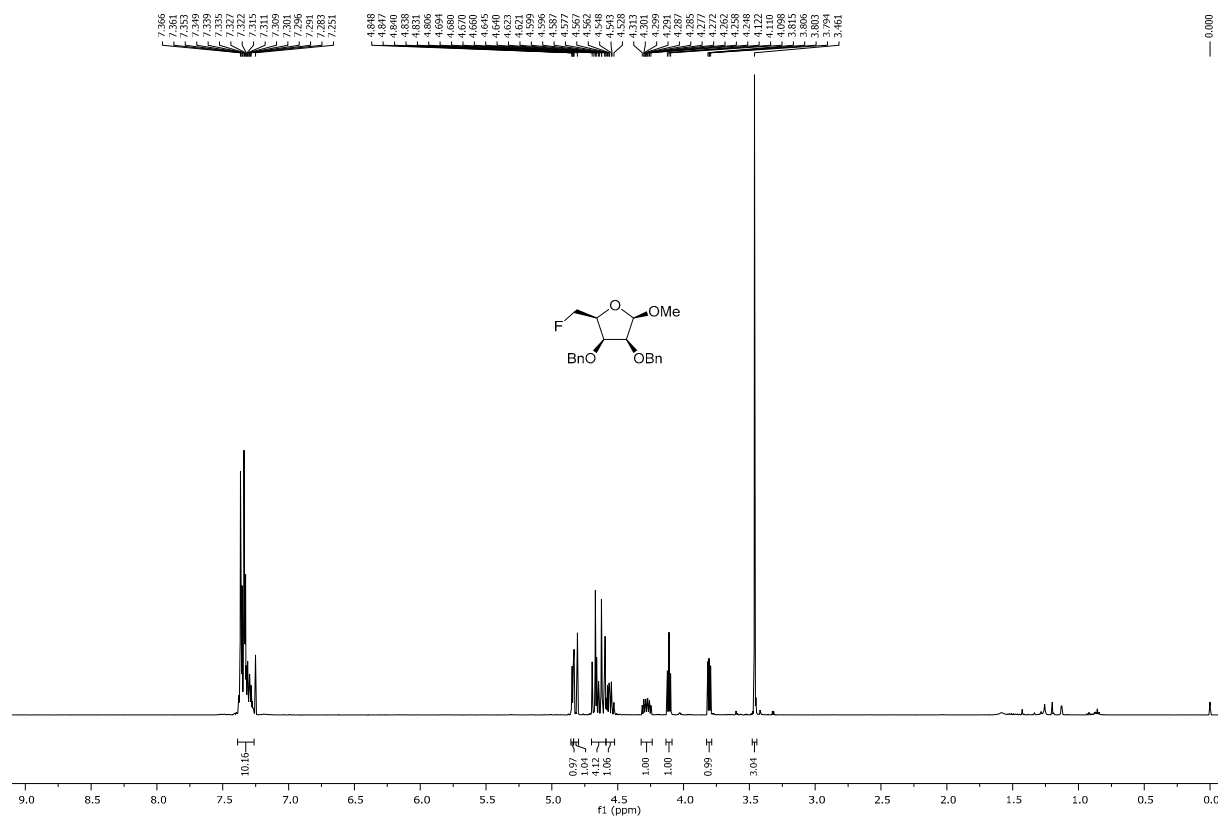

<sup>19</sup>F-decoupled <sup>1</sup>H NMR, (-227 ppm)

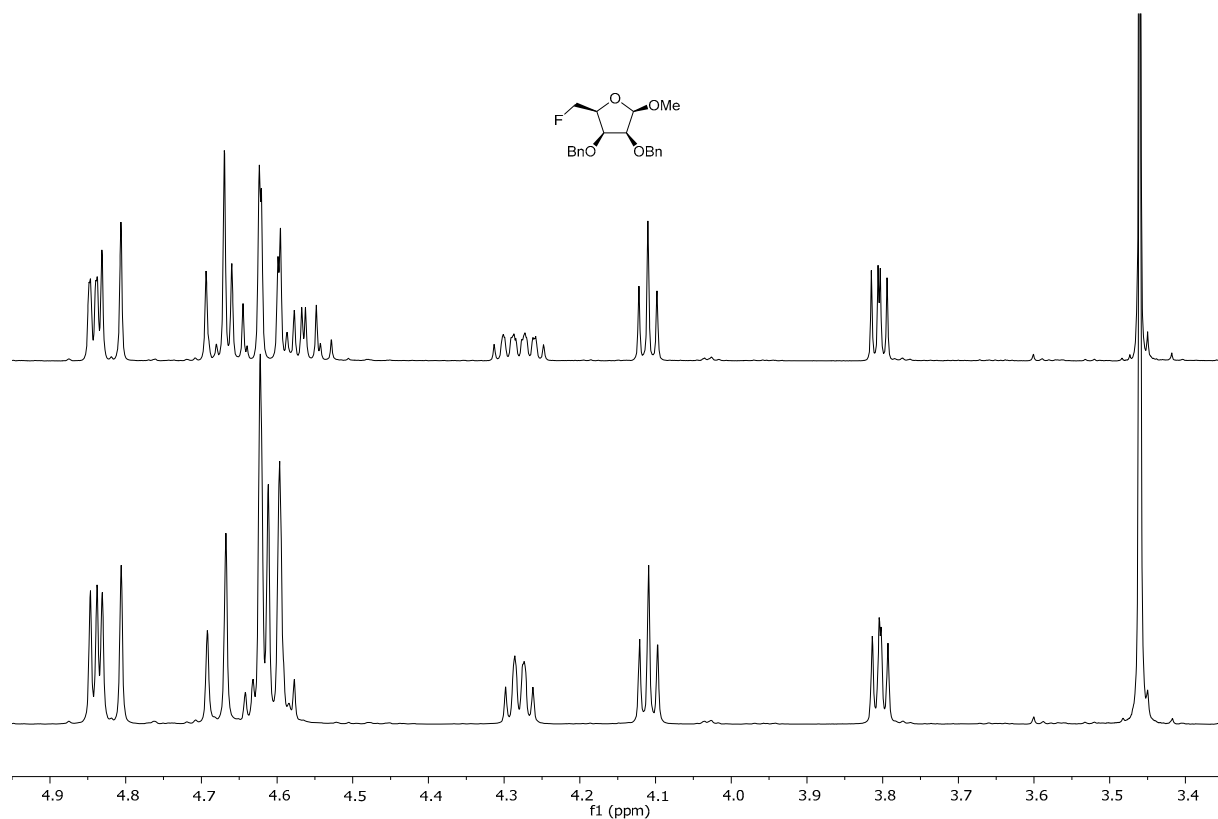



$^{13}\text{C}$ -APT NMR, 126 MHz,  $\text{CDCl}_3$  of compound **54 $\beta$**

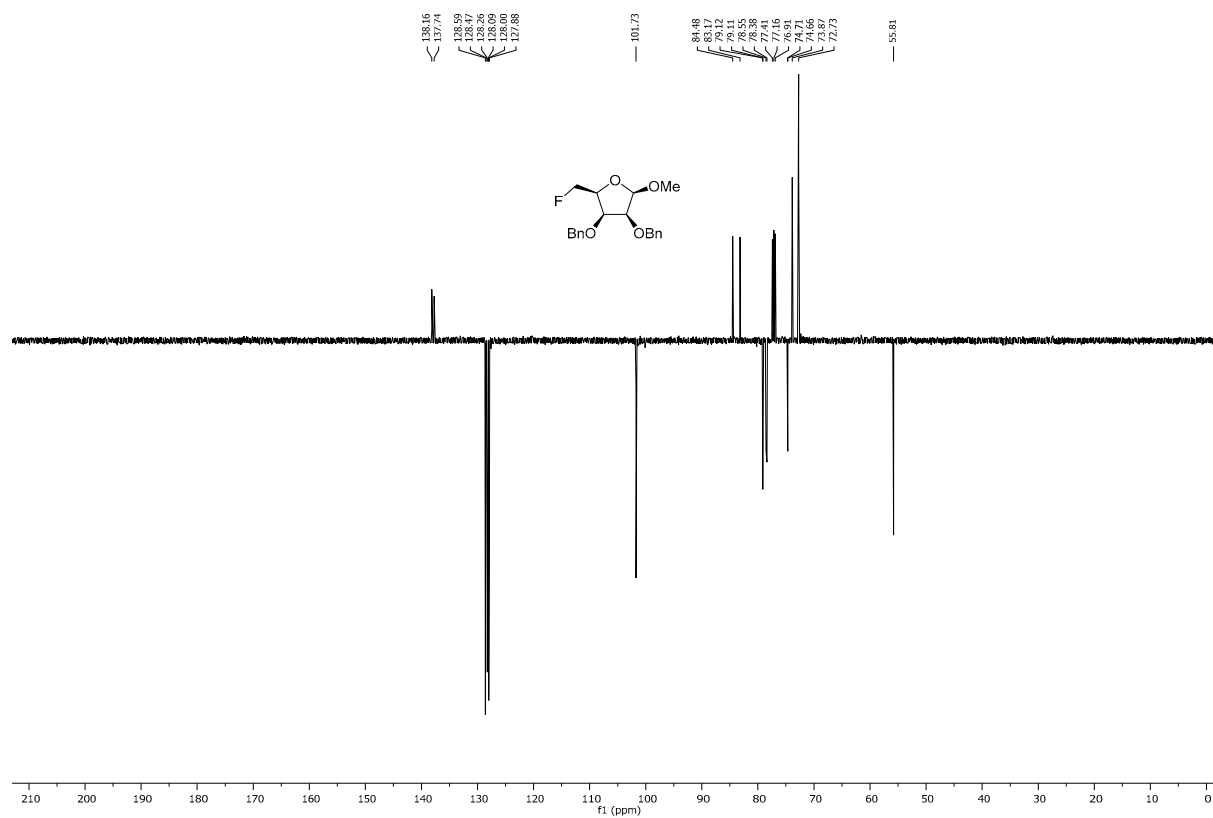

$^{19}\text{F}$  NMR, 471 MHz,  $\text{CDCl}_3$  of compound **54 $\beta$**

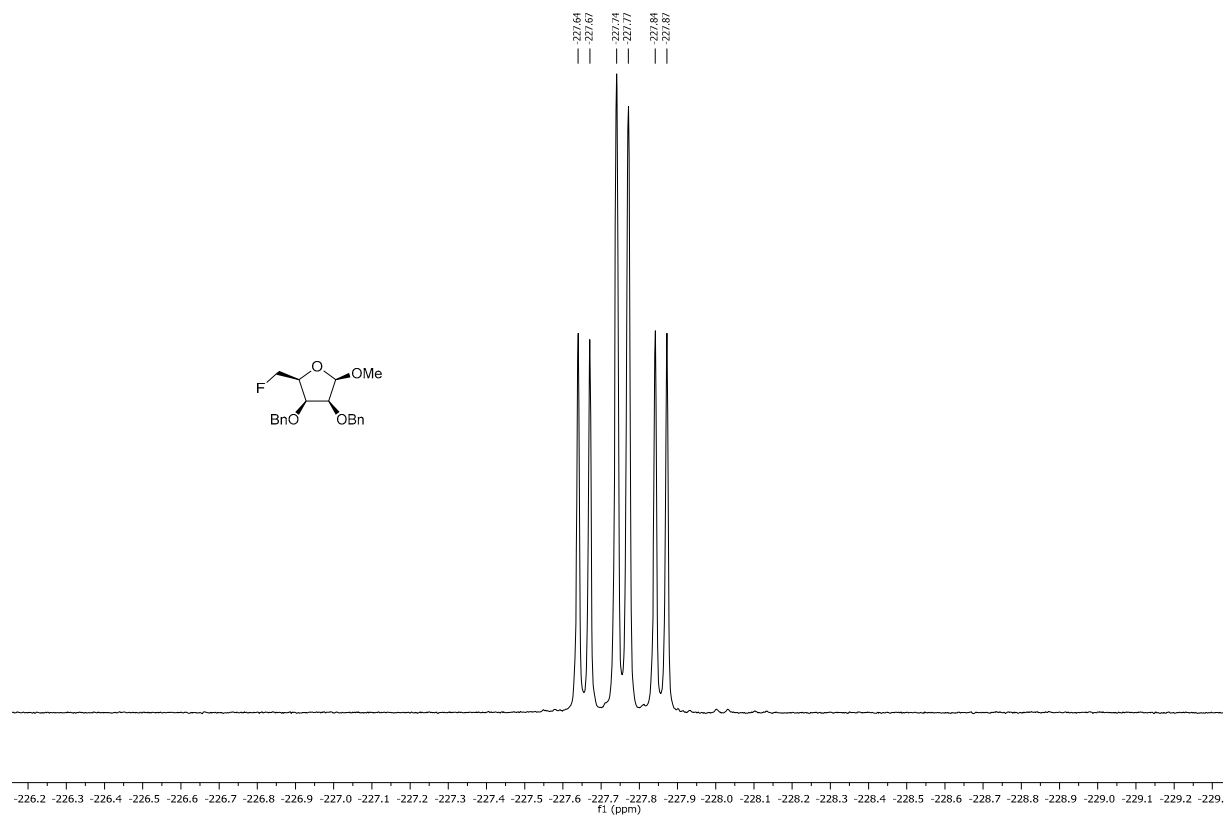

$^1\text{H}$ - $^1\text{H}$  COSY of compound **54 $\beta$**

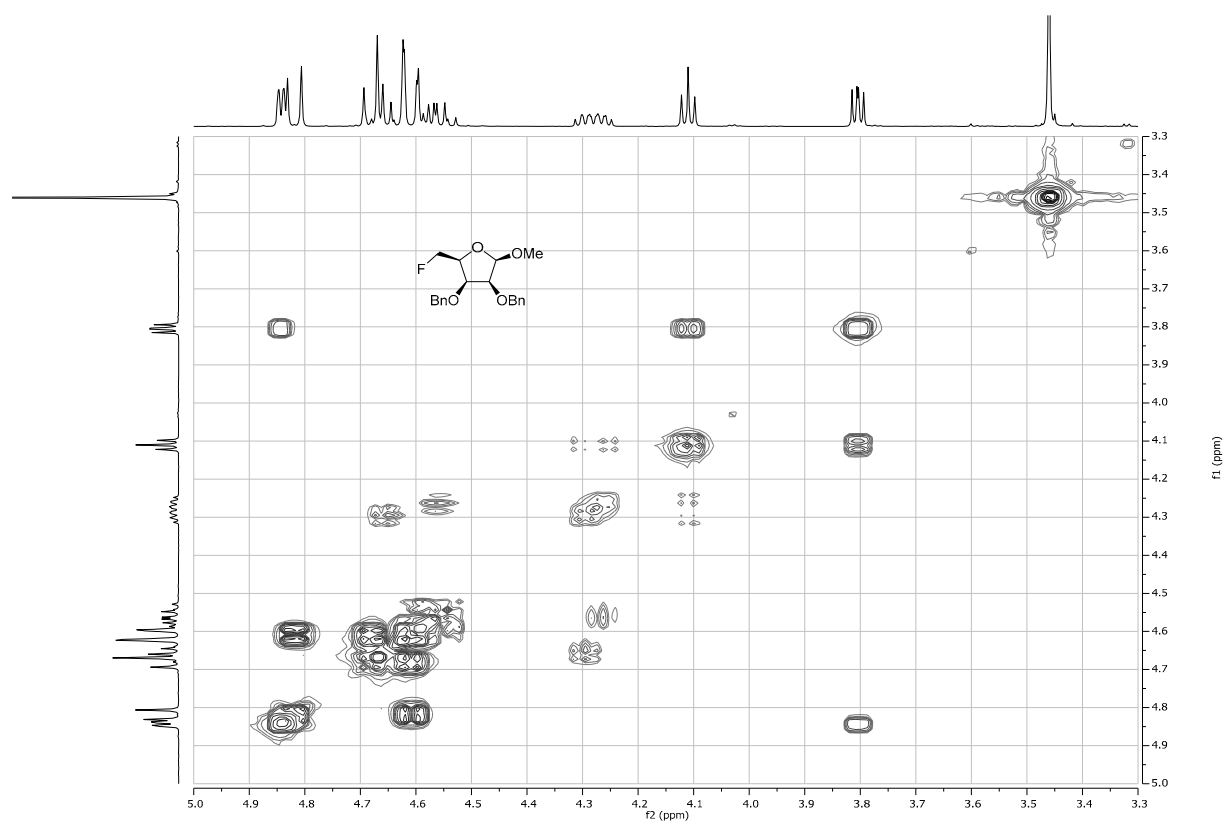

$^1\text{H}$ - $^{13}\text{C}$  HSQC of compound **54 $\beta$**

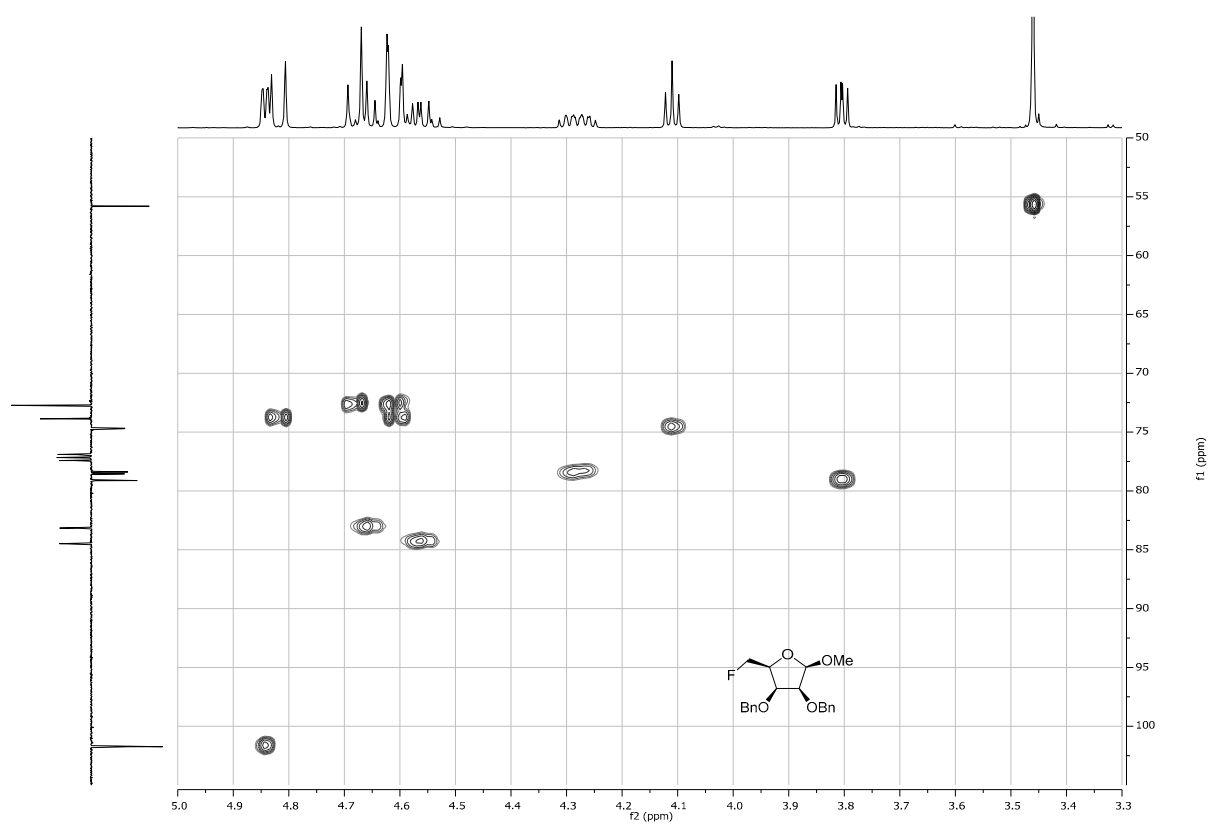

$^1\text{H}$ - $^1\text{H}$  NOESY of compound **54 $\beta$**

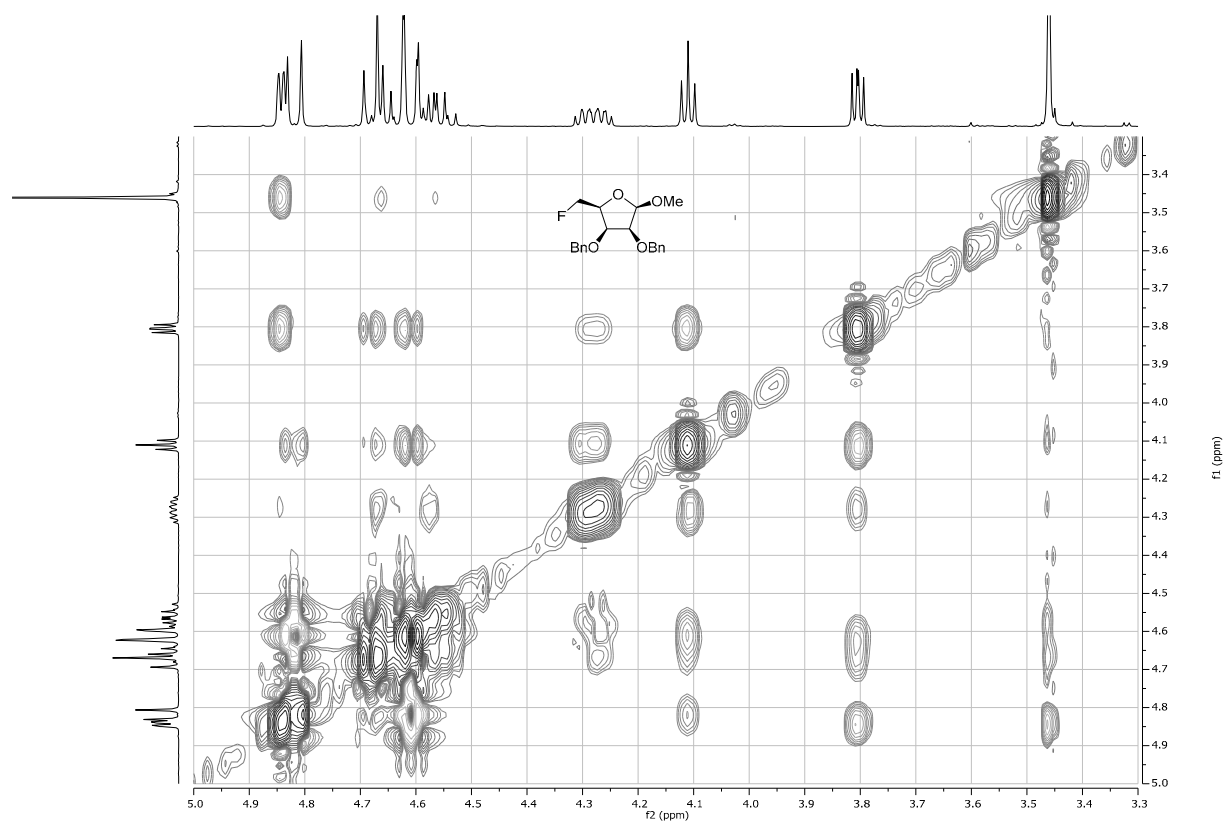

$^1\text{H}$ - $^{13}\text{C}$  HSQC-HECADE of compound **54 $\beta$**

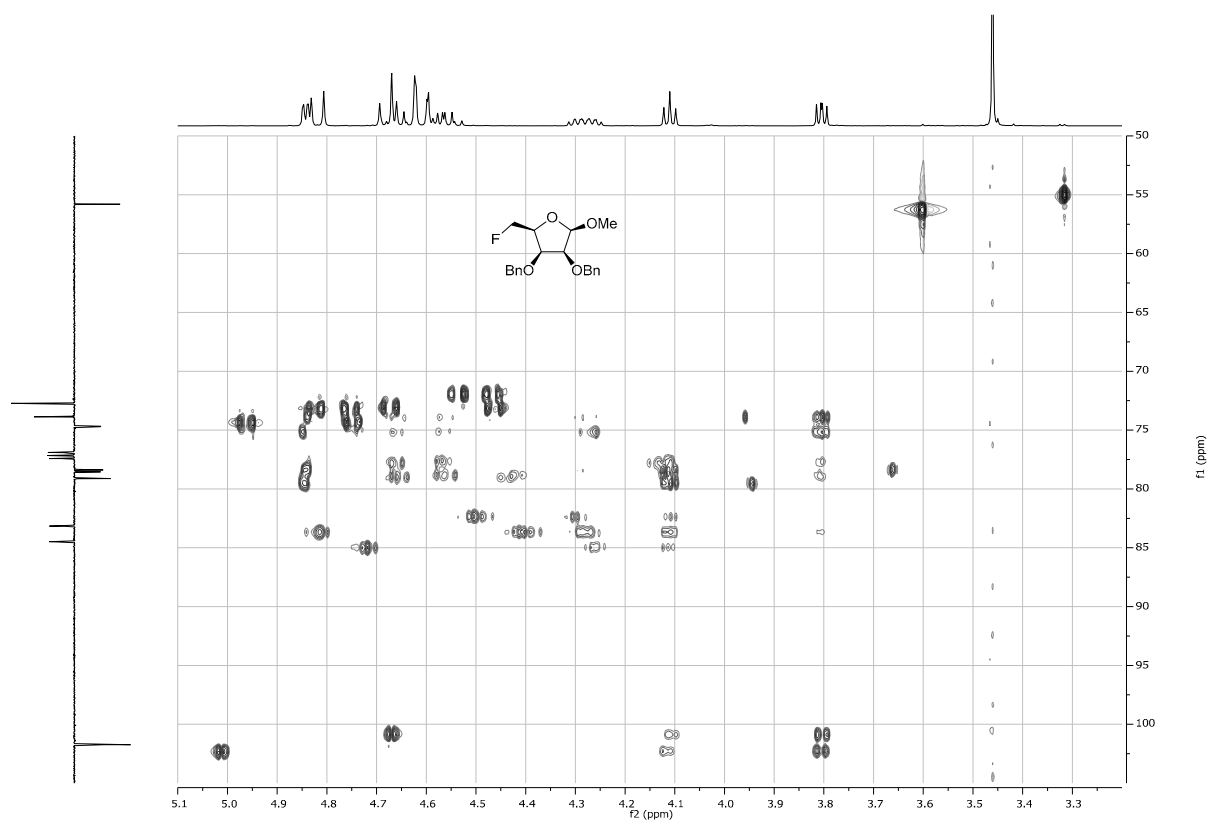

# Methyl 2,5-anhydro-3-O-benzyl- $\alpha$ -D-lyxofuranoside (55)

$^1\text{H}$  NMR, 400 MHz,  $\text{CDCl}_3$  of compound 55

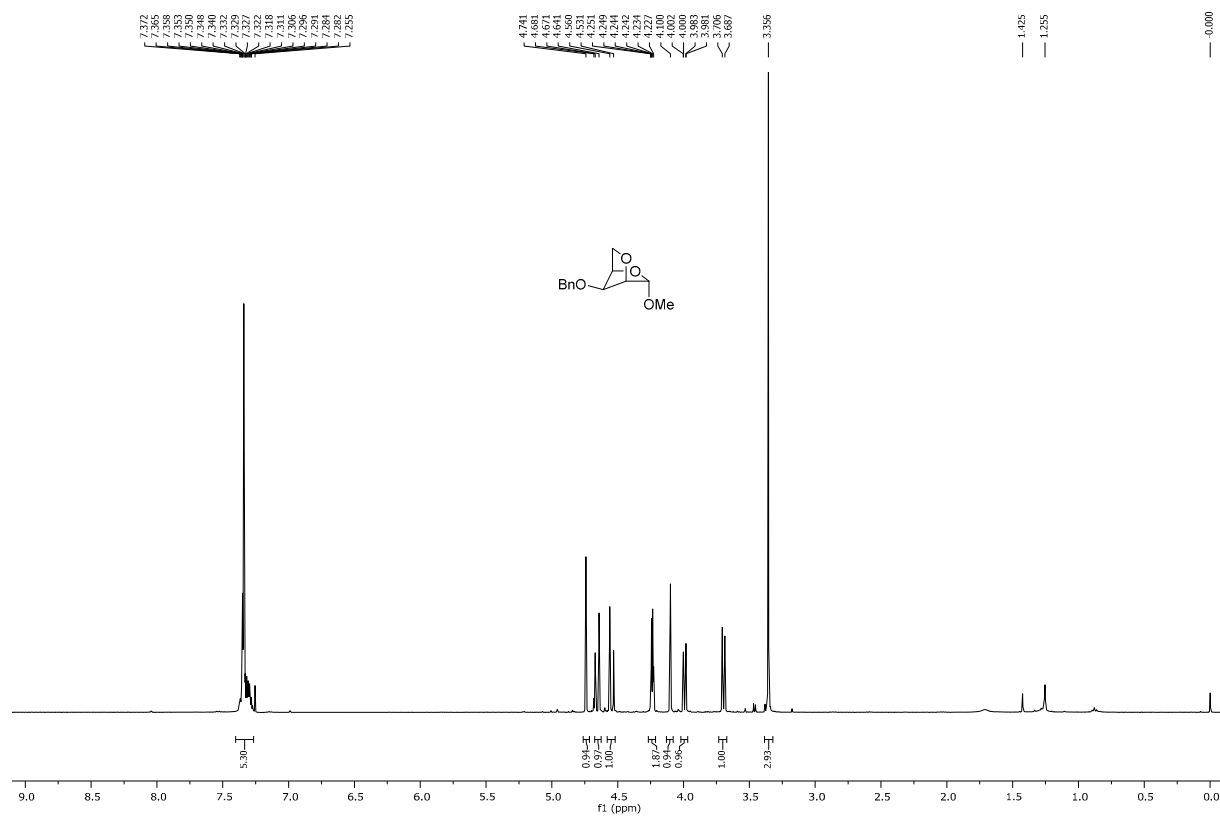

$^{13}\text{C}$ -APT NMR, 101 MHz,  $\text{CDCl}_3$  of compound 55

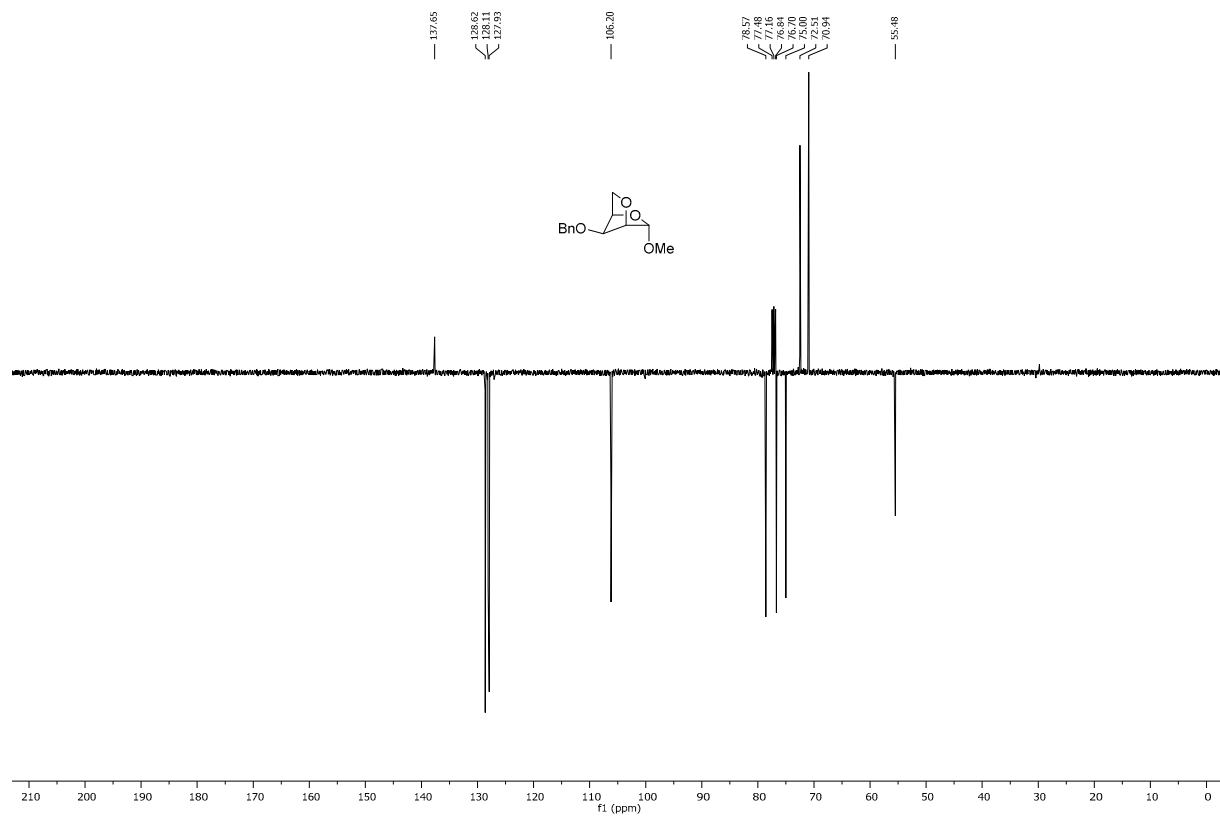

$^1\text{H}$ - $^1\text{H}$  COSY of compound **55**

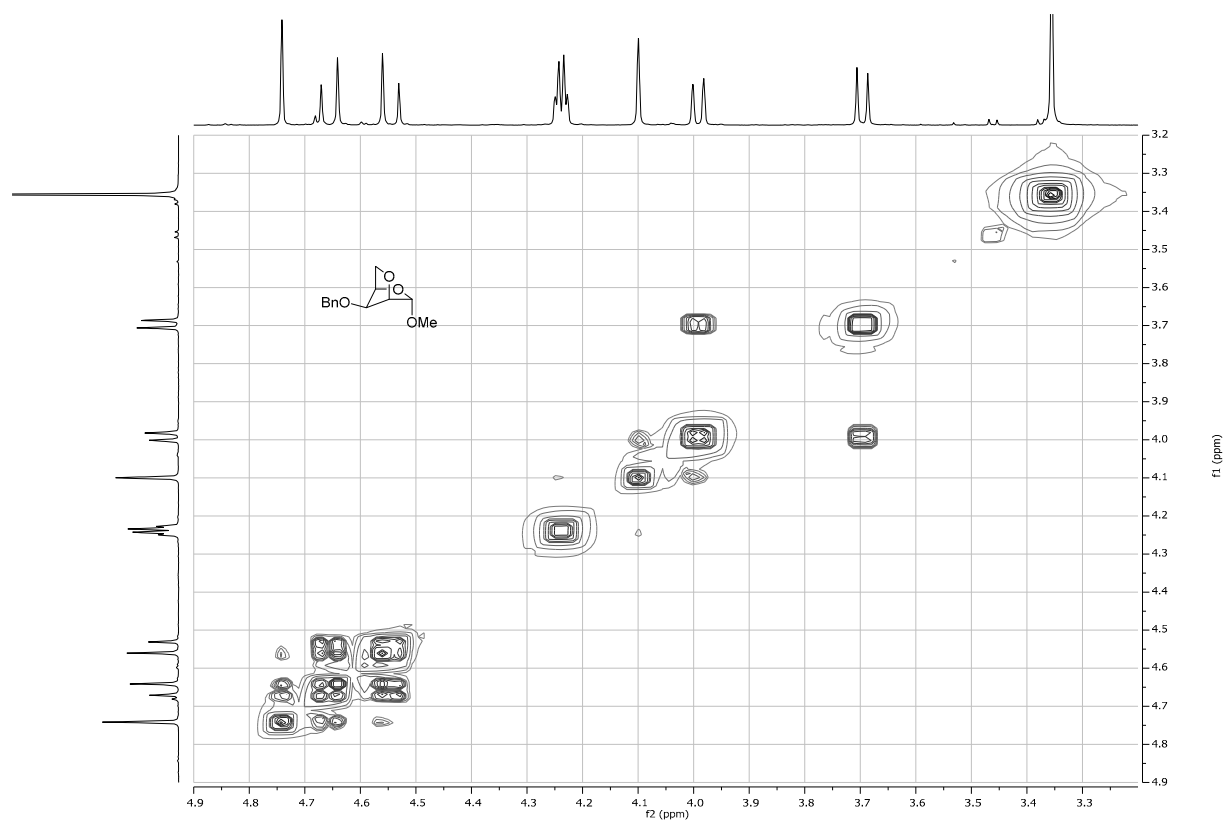

$^1\text{H}$ - $^1\text{H}$  COSY, optimized for long-range coupling constants (600 MHz) of compound **55**

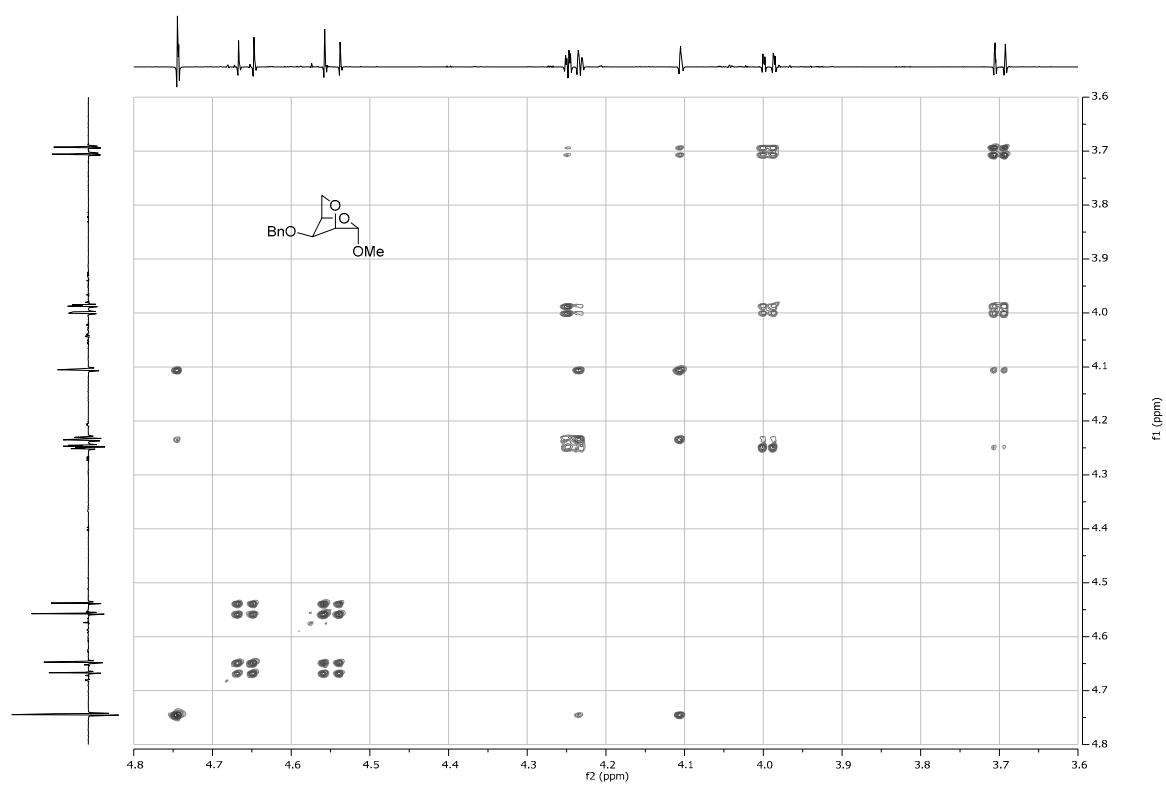

$^1\text{H}$ - $^{13}\text{C}$  HSQC of compound **55**

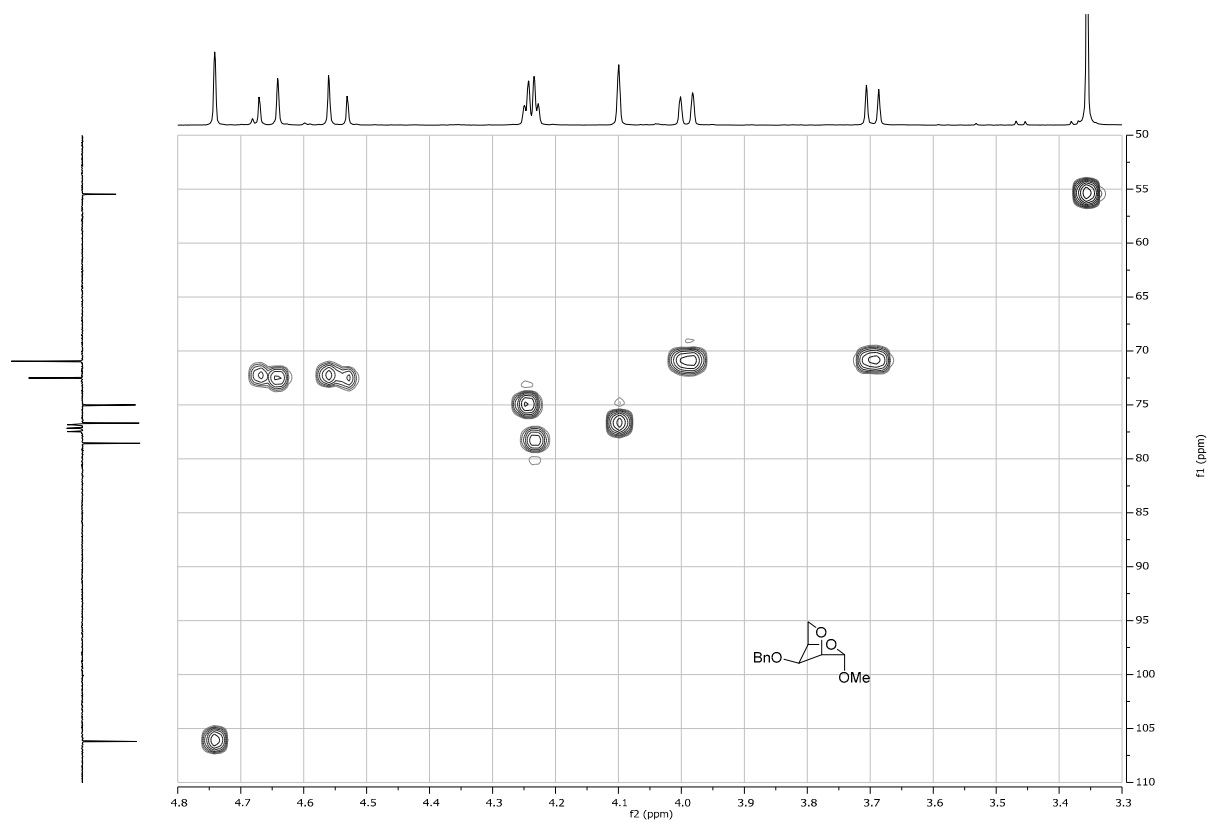

$^1\text{H}$ - $^{13}\text{C}$  HMBC of compound **55**

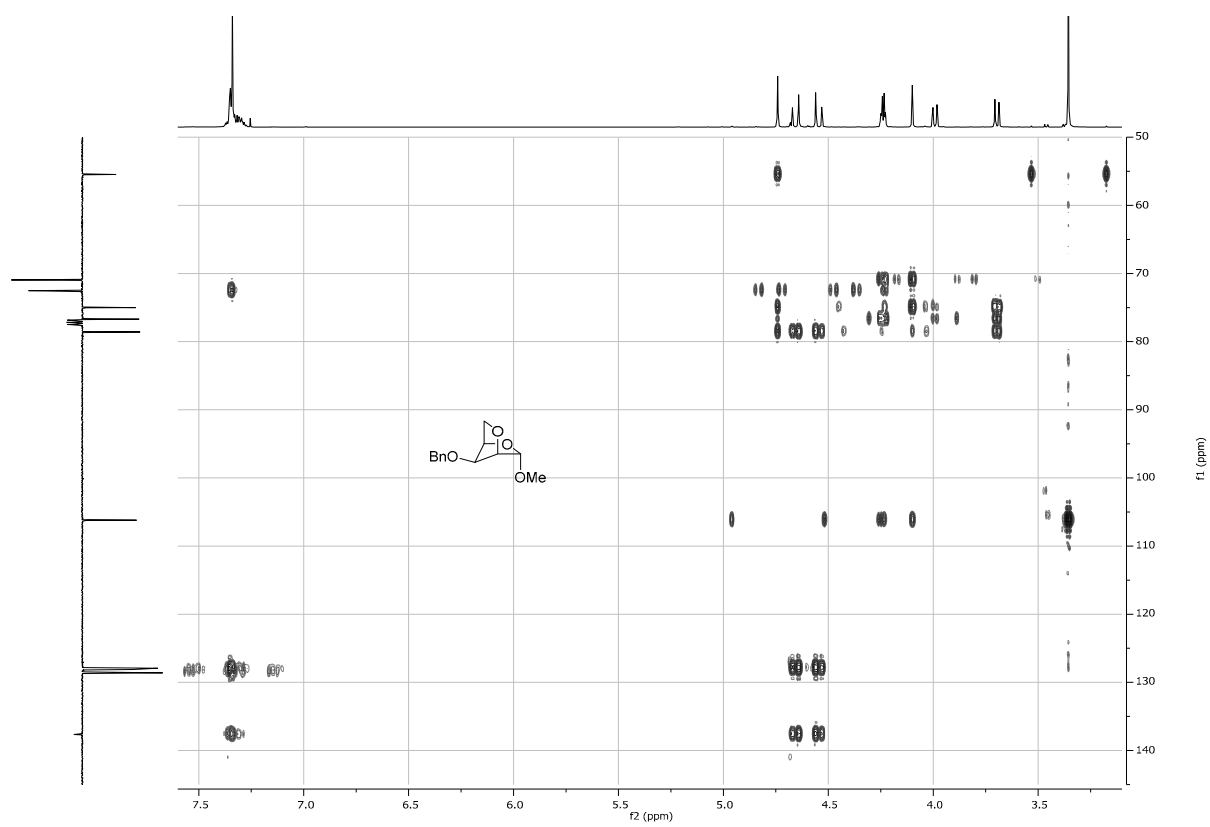

$^1\text{H}$ - $^1\text{H}$  NOESY of compound **55**

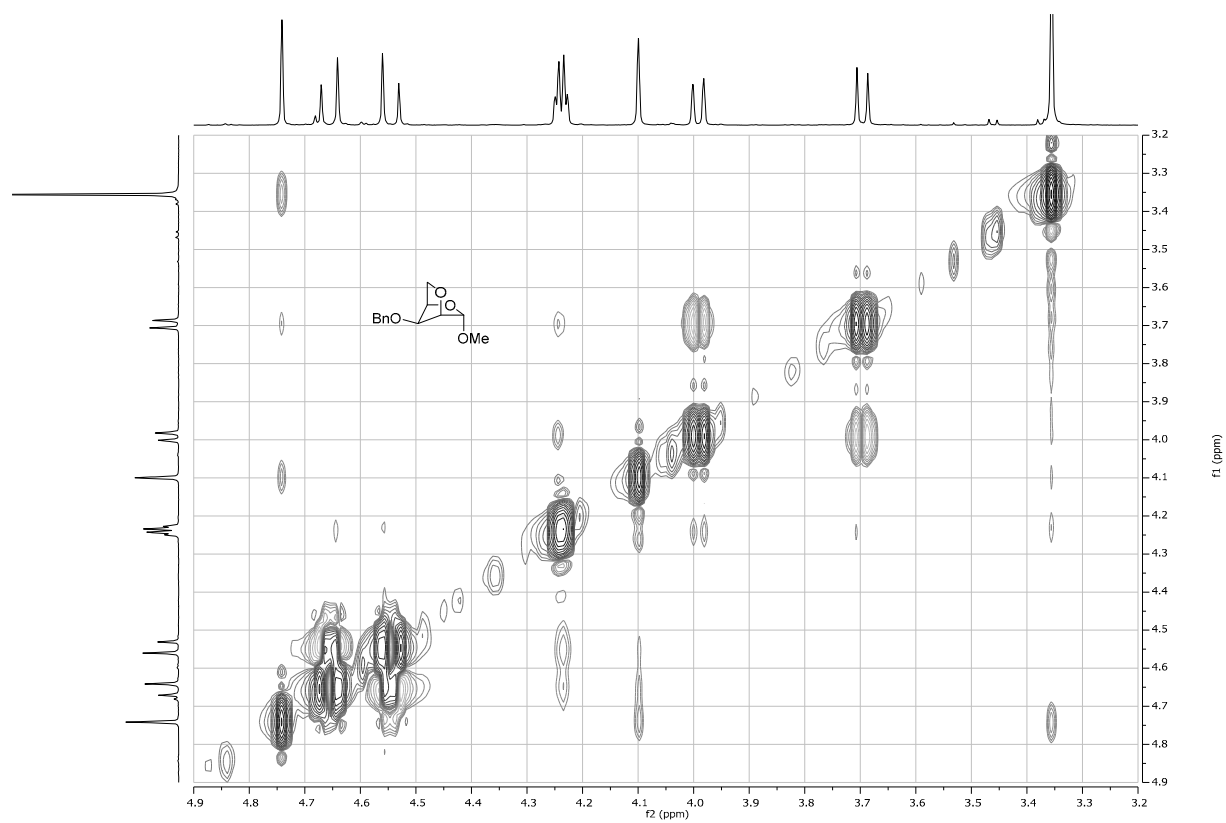

$^1\text{H}$ - $^{13}\text{C}$  HSQC-HECADE of compound **55**

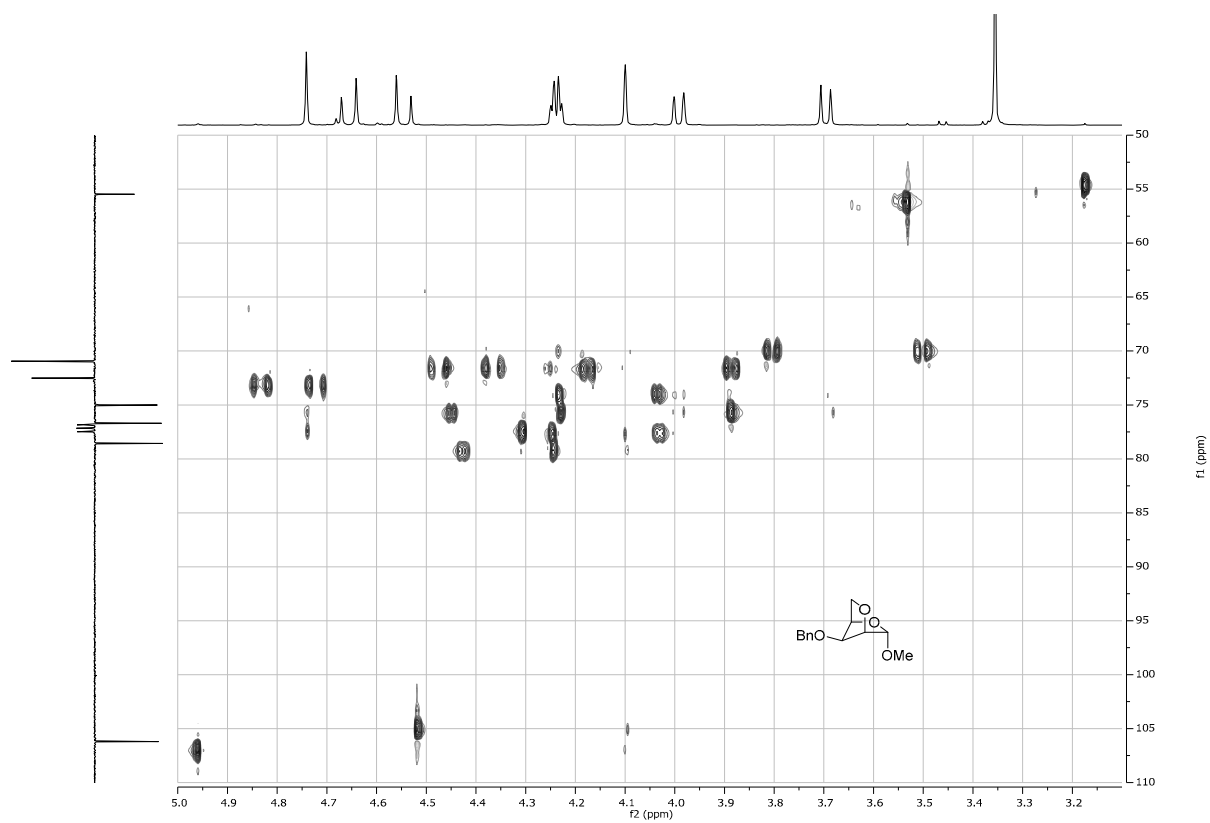

Methyl (1-allyl-2,3-di-O-benzyl-1-deoxy- $\alpha$ -D-ribofuranosyl uronate) (65)

$^1\text{H}$  NMR, 500 MHz,  $\text{CDCl}_3$  of compound 65

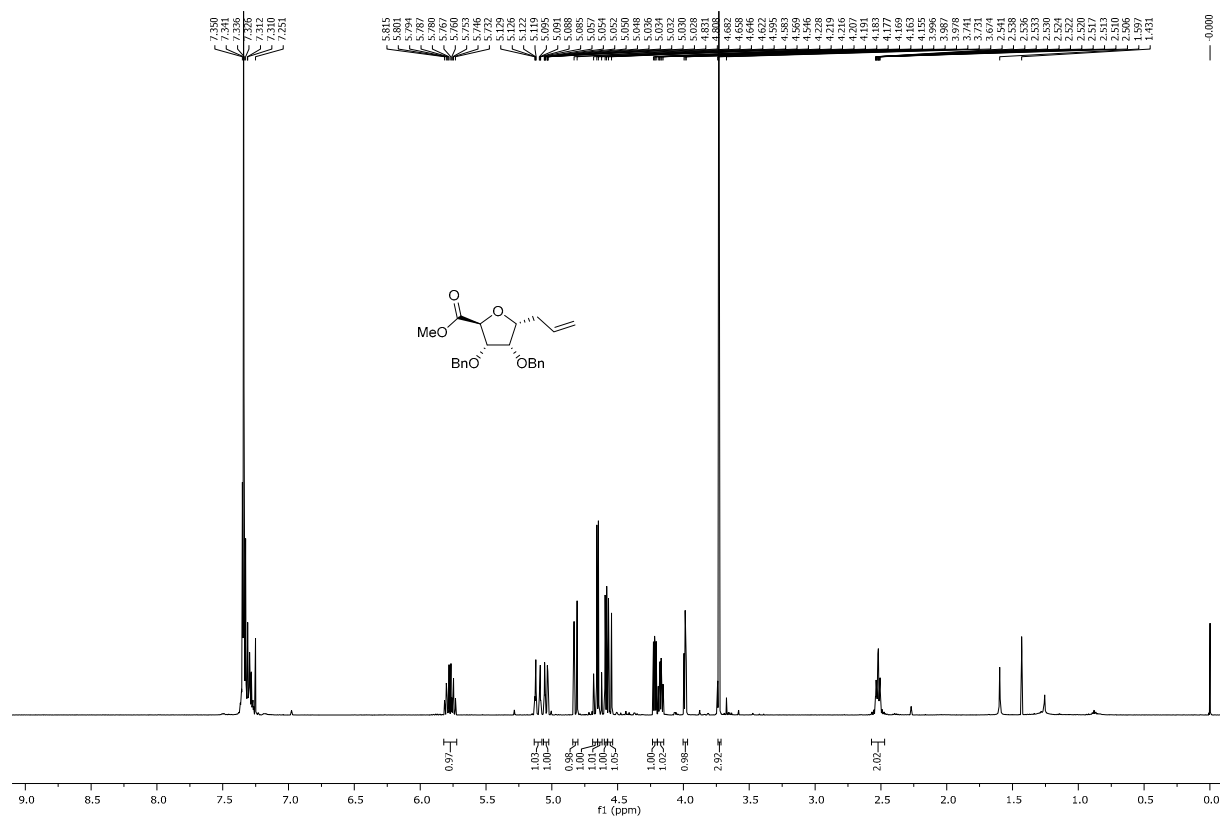

$^{13}\text{C}$ -APT NMR, 126 MHz,  $\text{CDCl}_3$  of compound 65

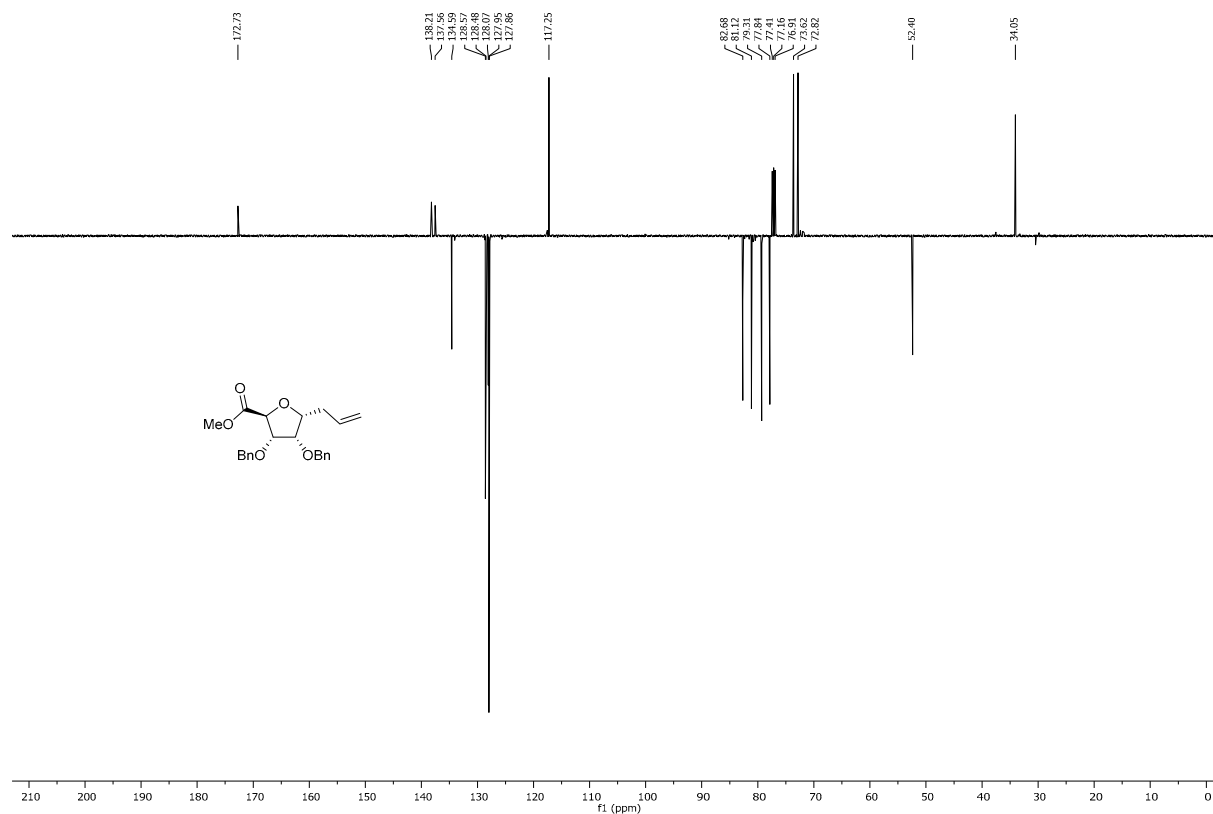



$^1\text{H}$ - $^1\text{H}$  COSY of compound **65**

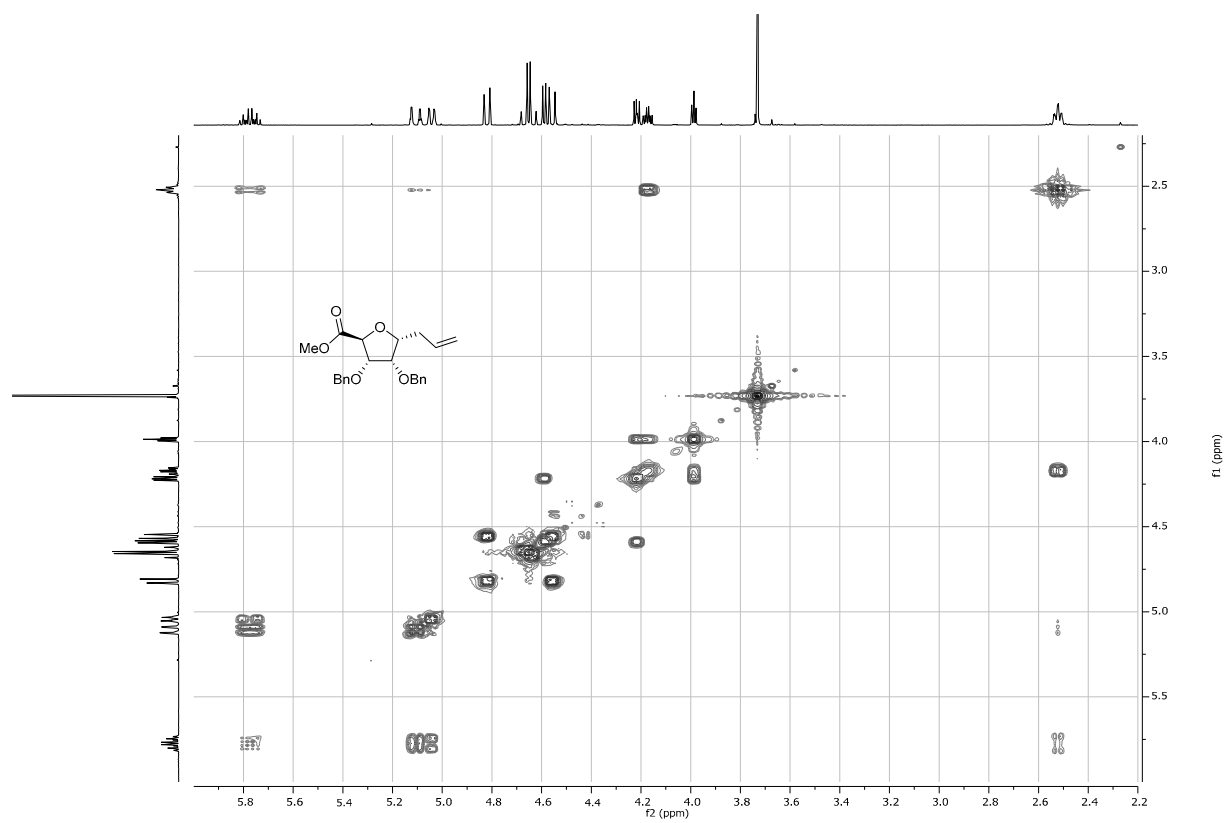

$^1\text{H}$ - $^{13}\text{C}$  HSQC of compound **65**

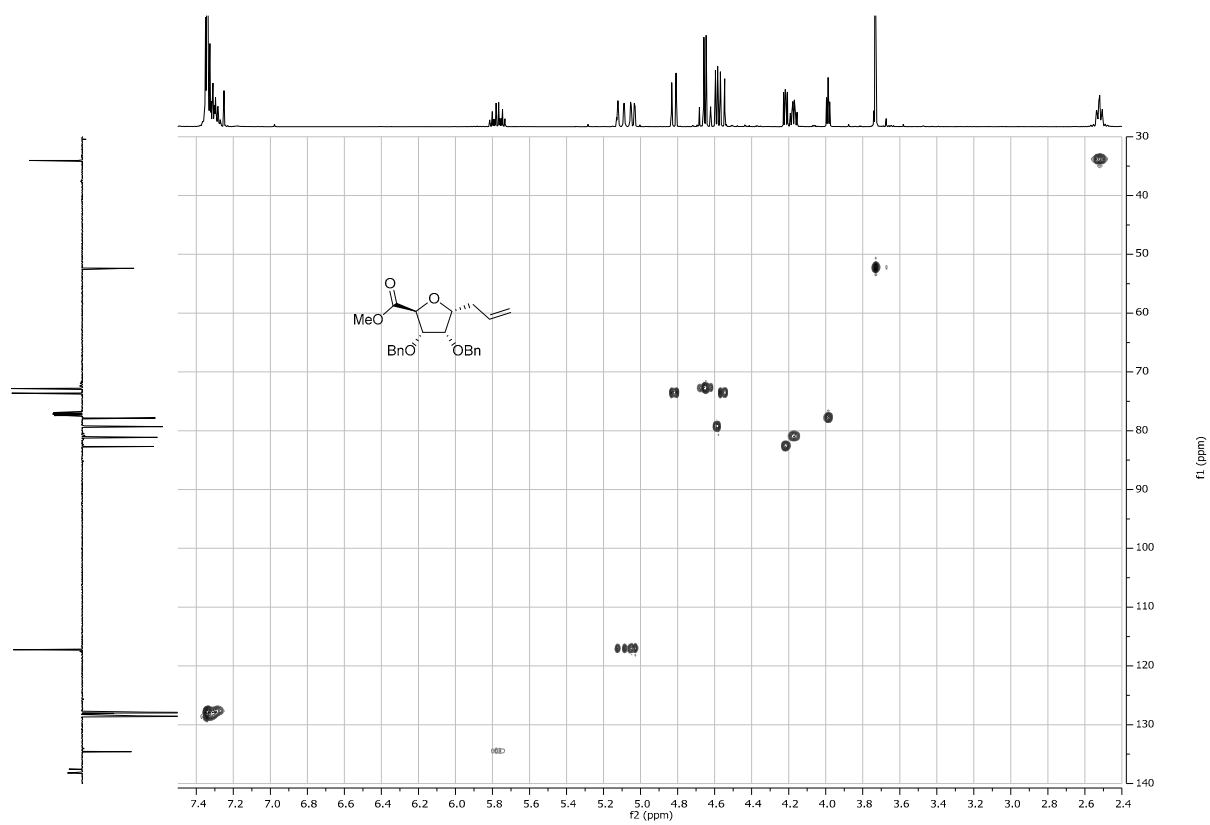

$^1\text{H}$ - $^1\text{H}$  NOESY of compound **65**

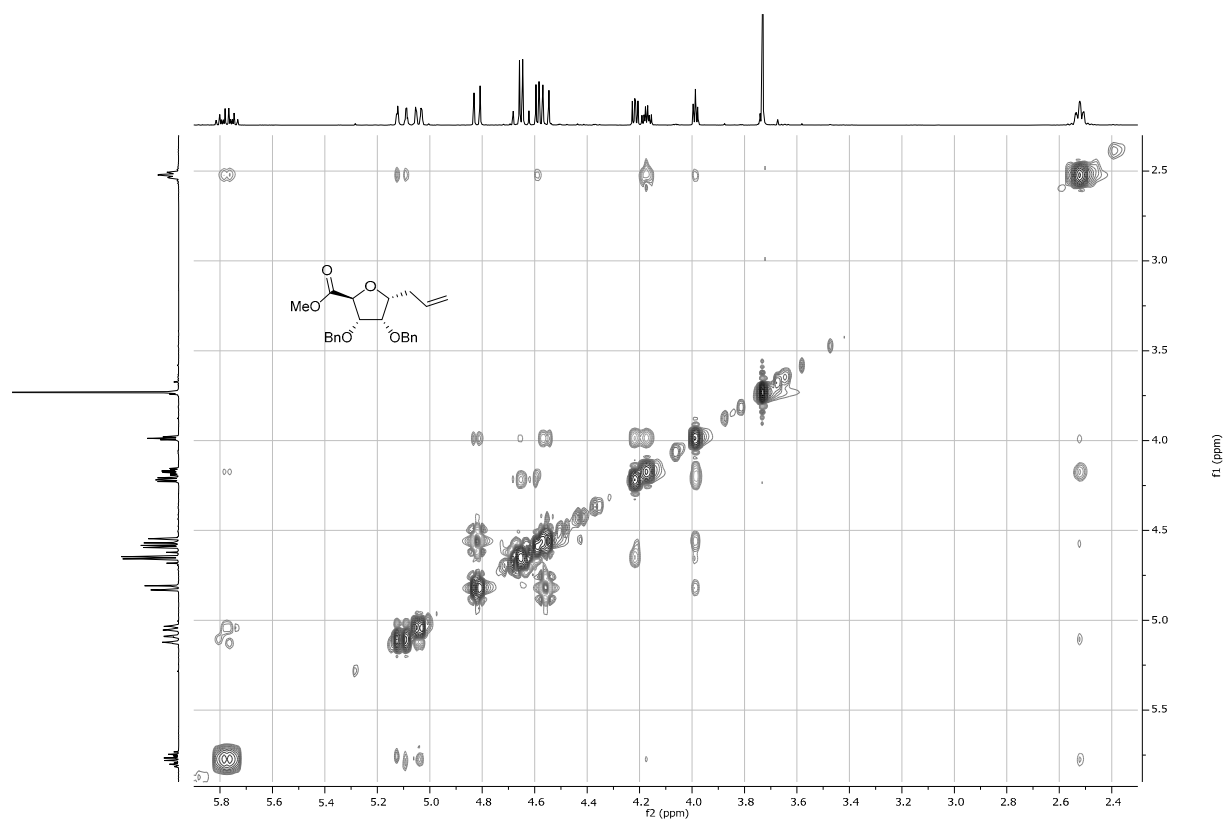

$^1\text{H}$ - $^{13}\text{C}$  HSQC-HECADE of compound **65**

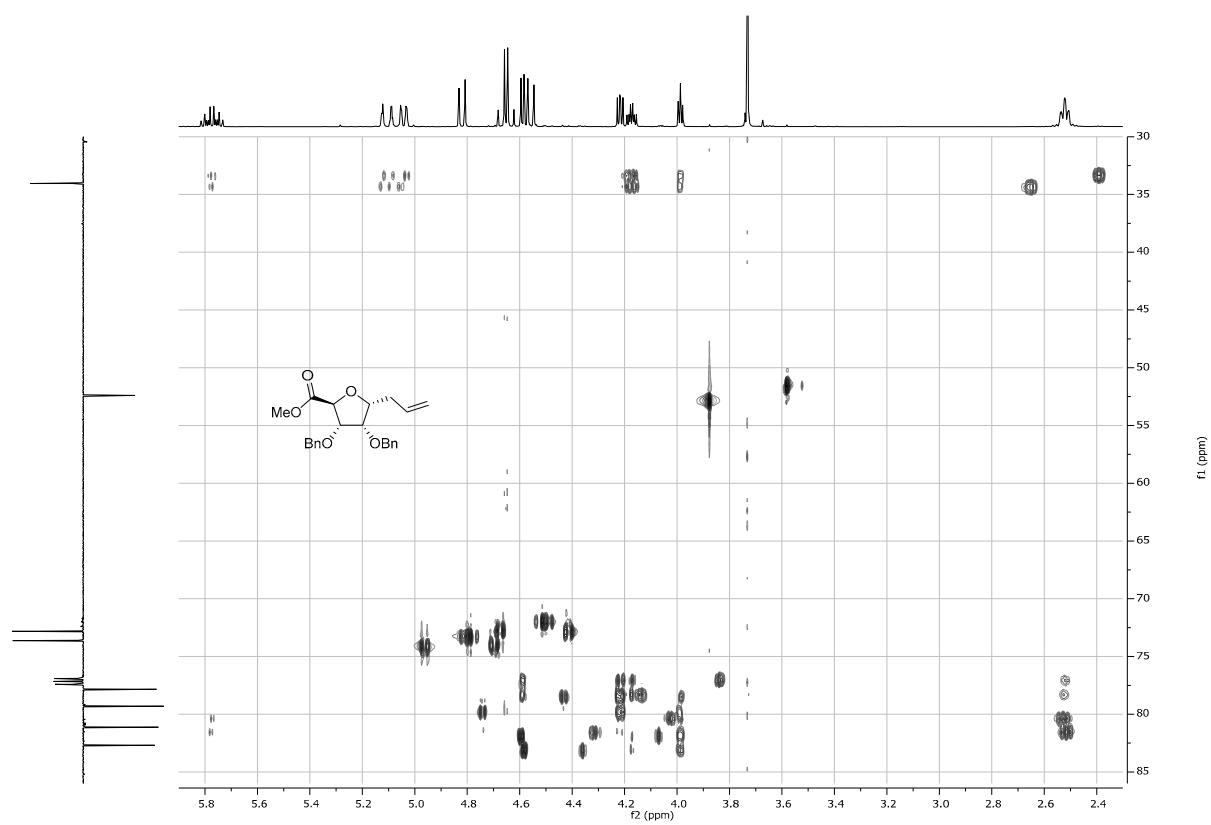

Methyl (1-allyl-2,3-di-O-benzyl-1-deoxy-β-D-arabinofuranosyl uronate) (66)

<sup>1</sup>H NMR, 500 MHz, CDCl<sub>3</sub> of compound 66

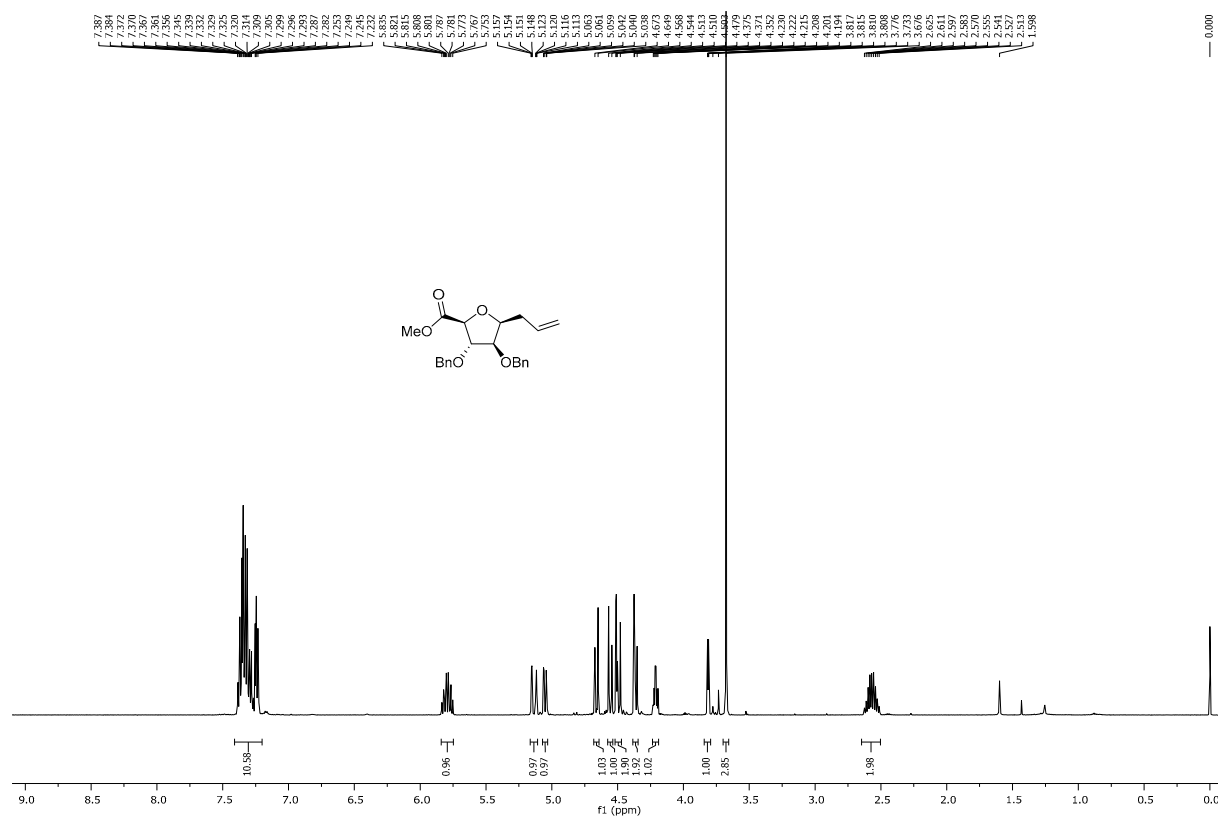

<sup>13</sup>C-APT NMR, 126 MHz, CDCl<sub>3</sub> of compound 66

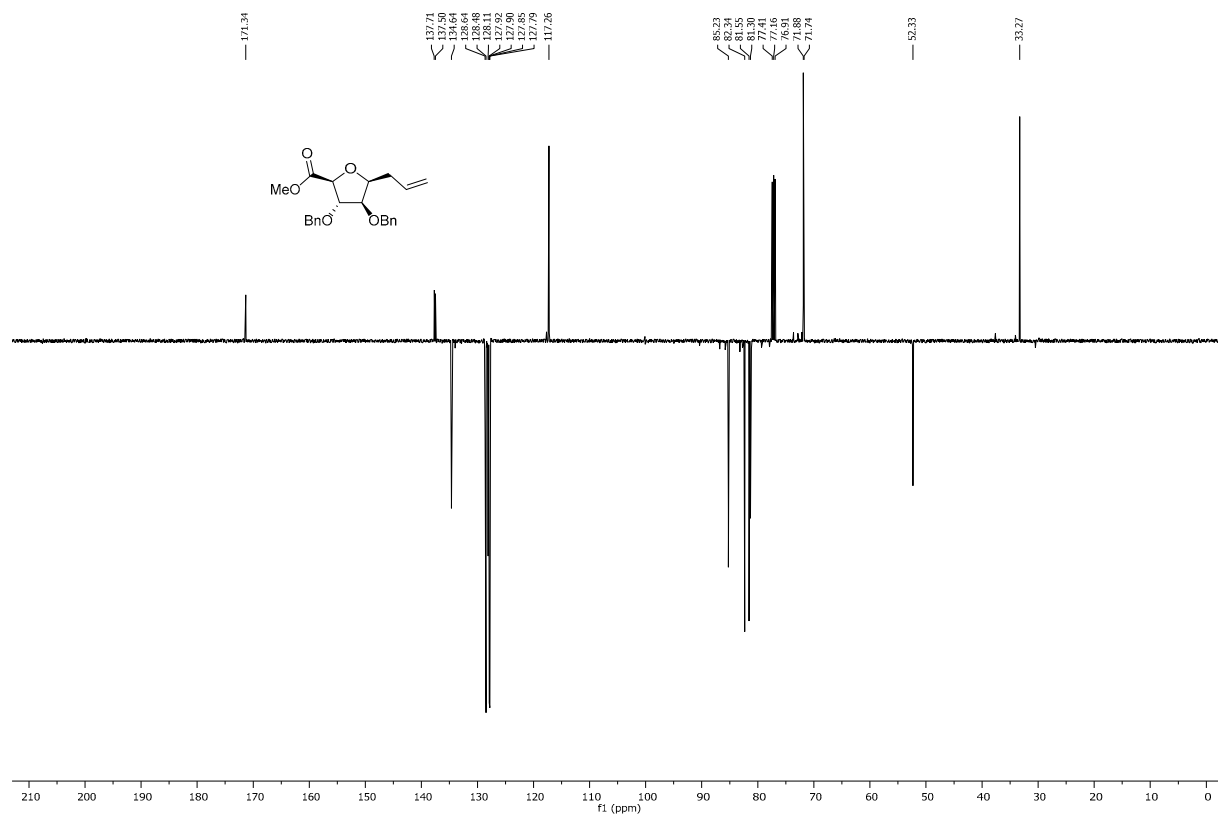

$^1\text{H}$ - $^1\text{H}$  COSY of compound **66**

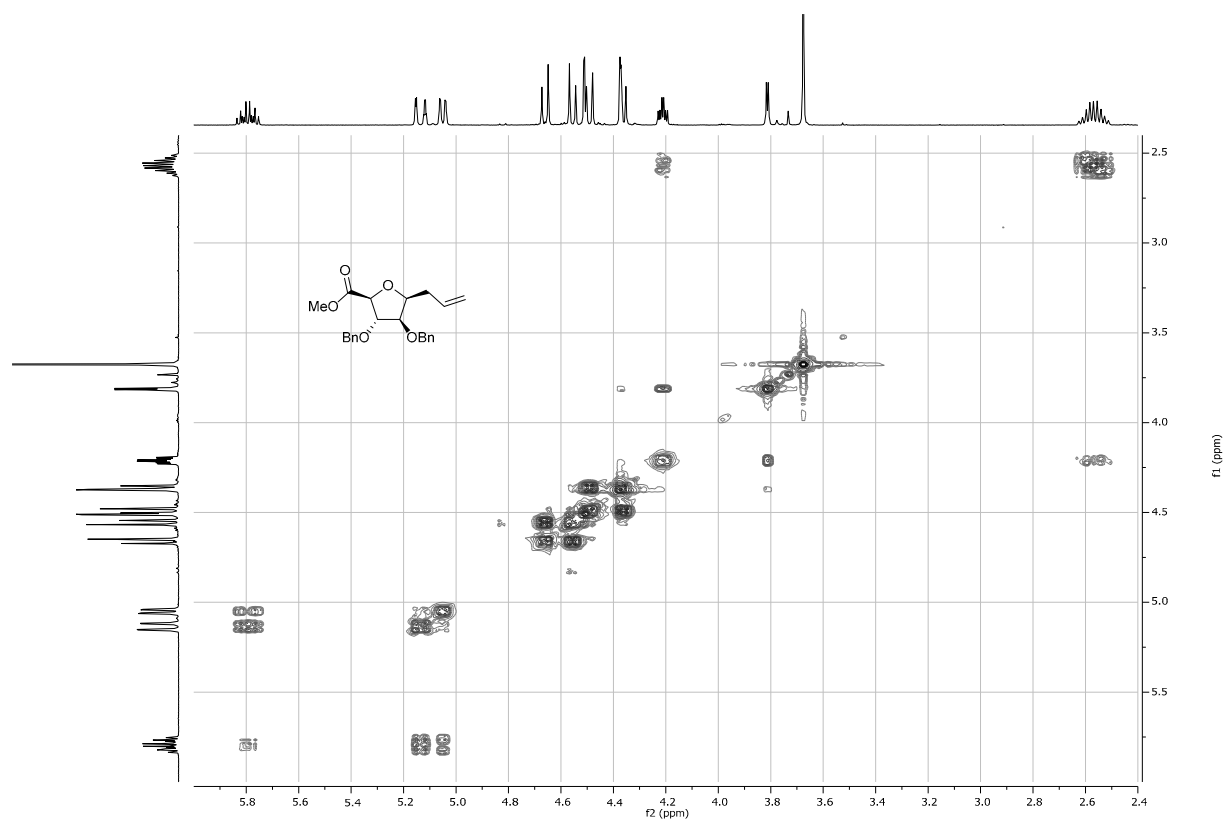

$^1\text{H}$ - $^{13}\text{C}$  HSQC of compound **66**

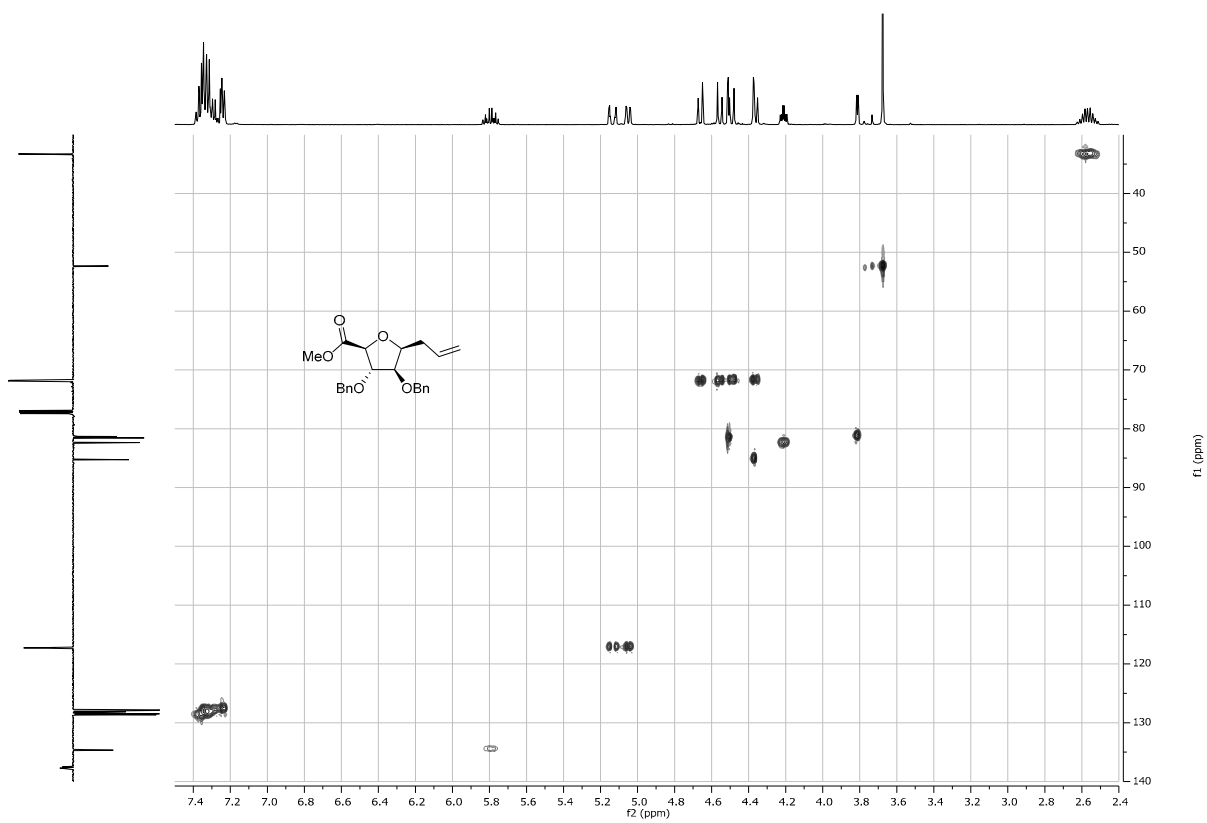

$^1\text{H}$ - $^1\text{H}$  NOESY of compound **66**

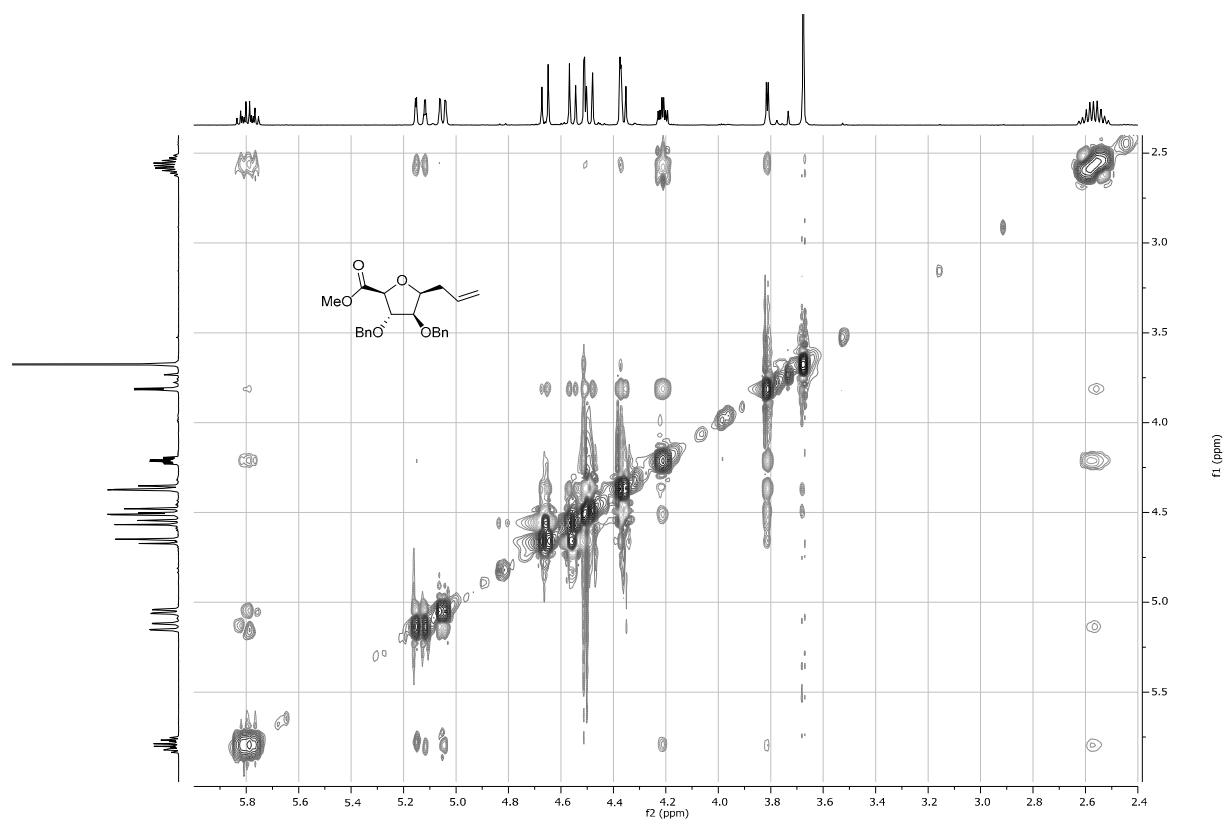

$^1\text{H}$ - $^{13}\text{C}$  HSQC-HECADE of compound **66**

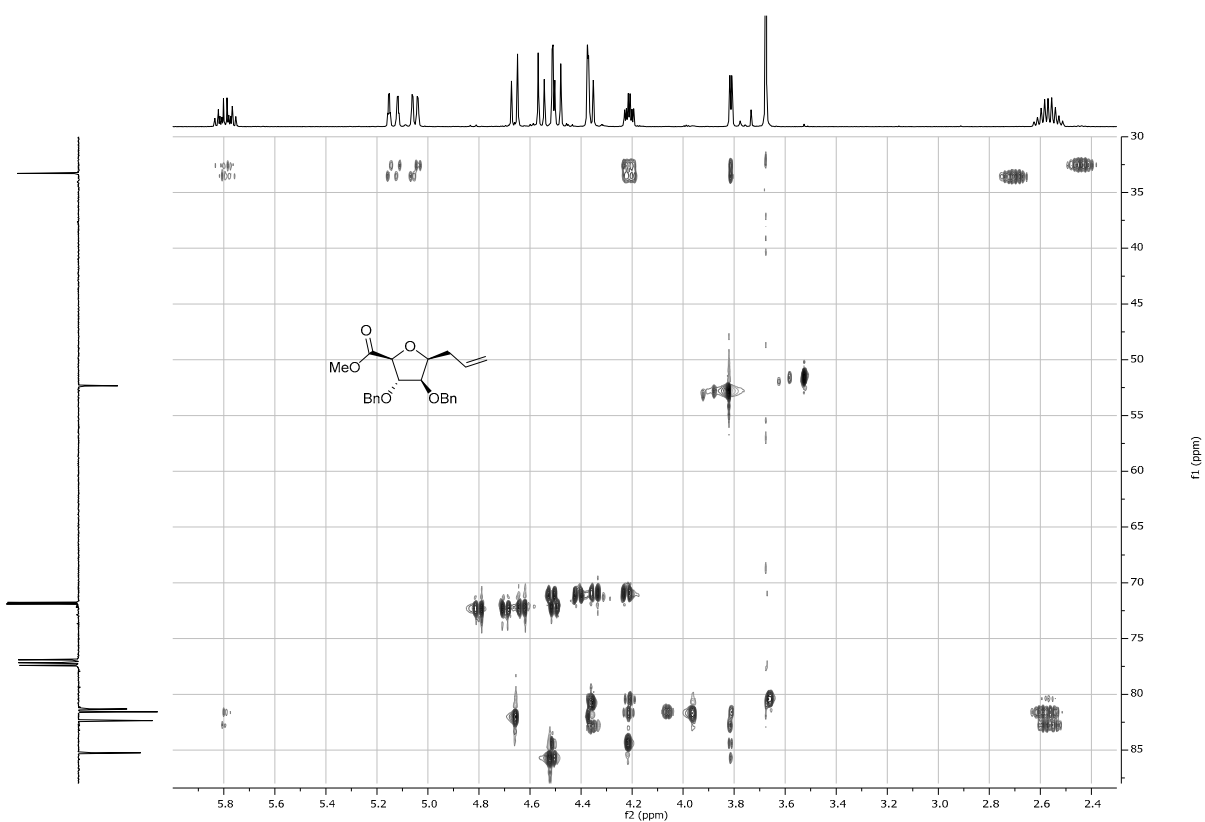

Methyl (1-allyl-2,3-di-O-benzyl-1-deoxy-β-D-lyxofuranosyl uronate) (67)

<sup>1</sup>H NMR, 500 MHz, CDCl<sub>3</sub> of compound 67

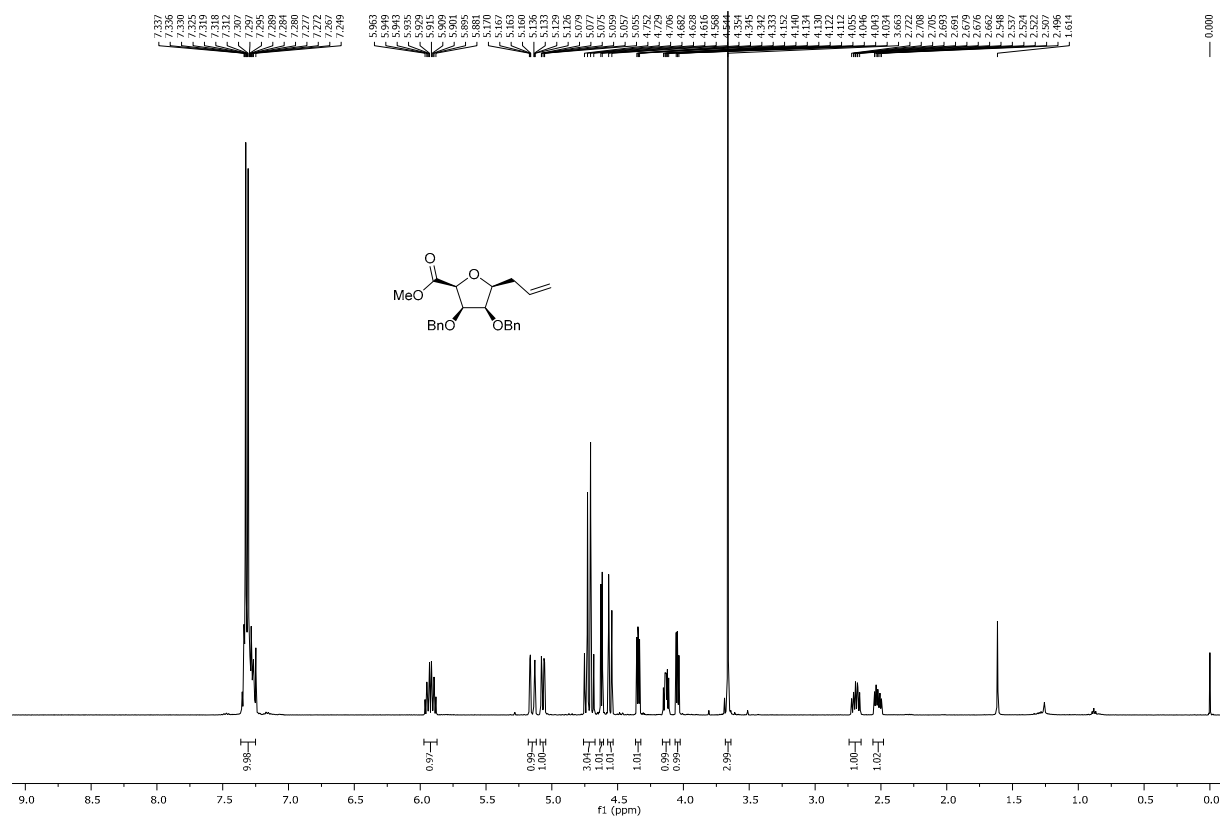

<sup>13</sup>C-APT NMR, 126 MHz, CDCl<sub>3</sub> of compound 67

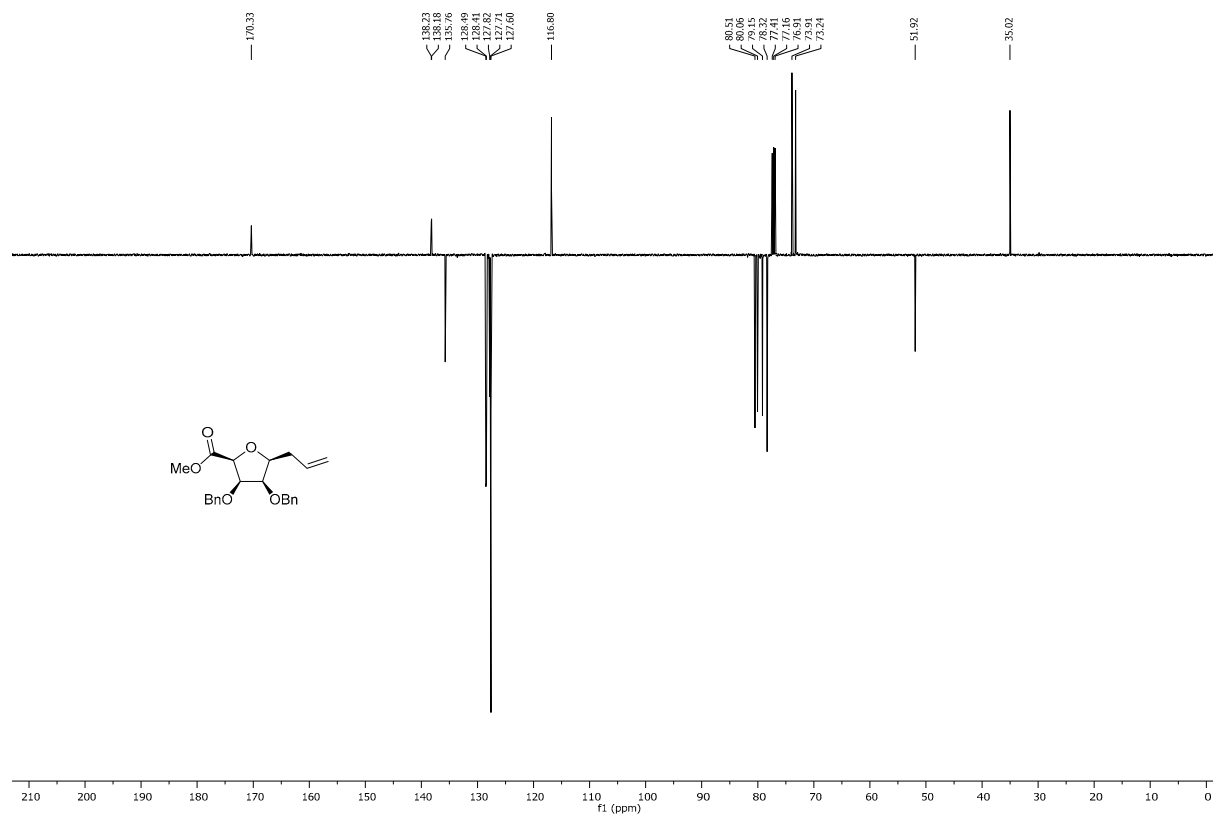

$^1\text{H}$ - $^1\text{H}$  COSY of compound **67**

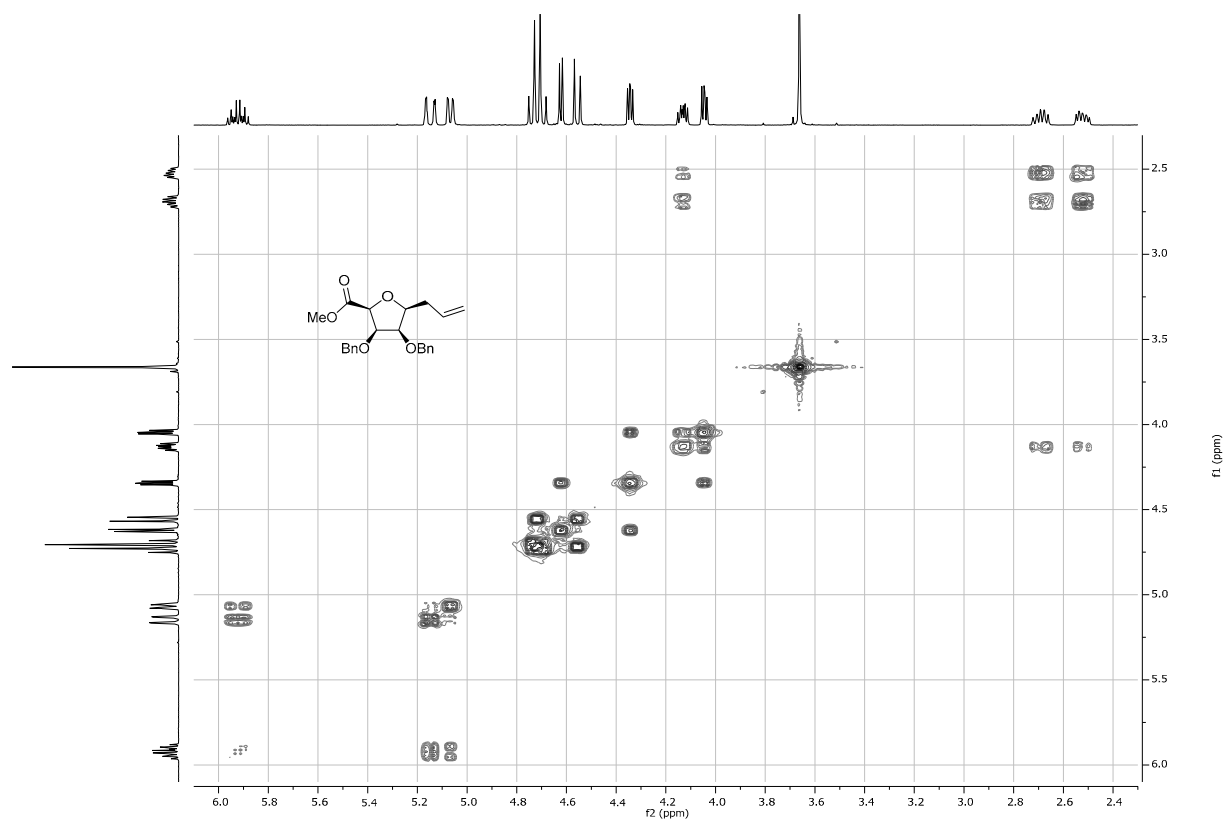

$^1\text{H}$ - $^{13}\text{C}$  HSQC of compound **67**

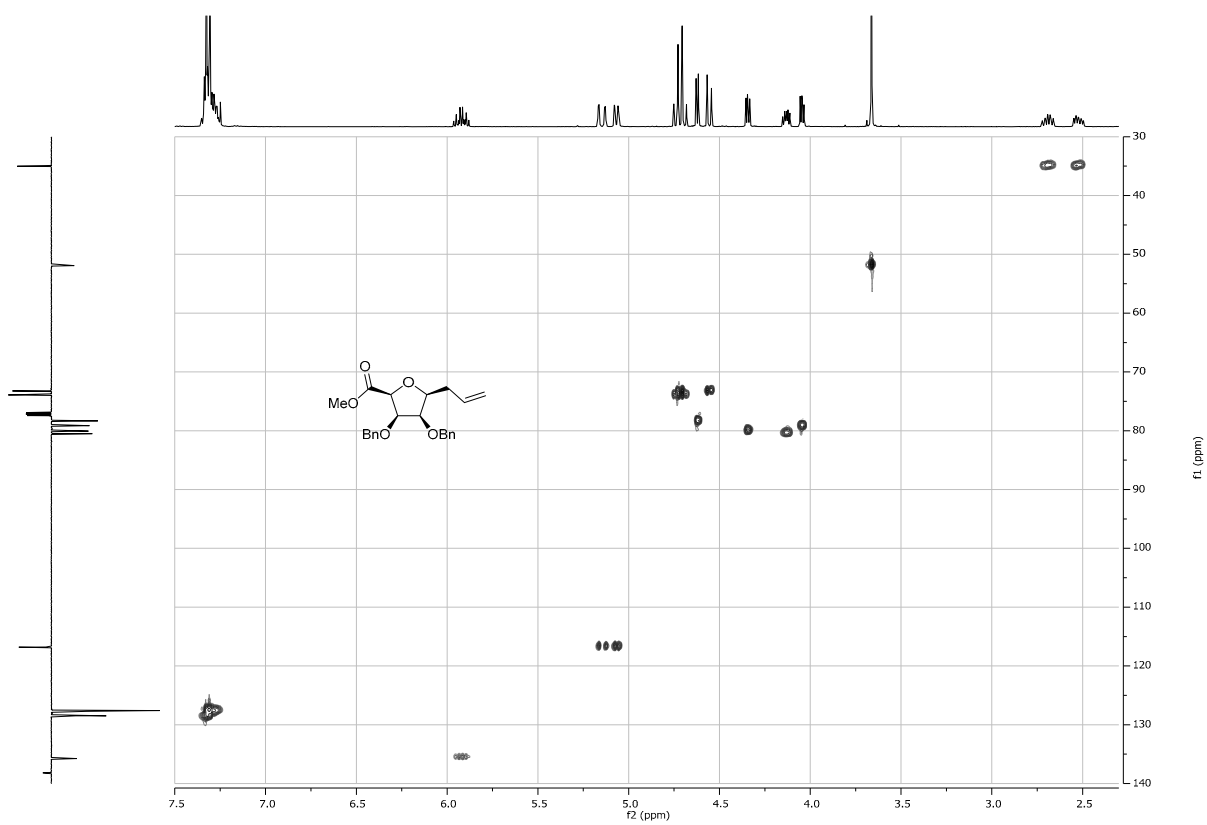

$^1\text{H}$ - $^1\text{H}$  NOESY of compound **67**

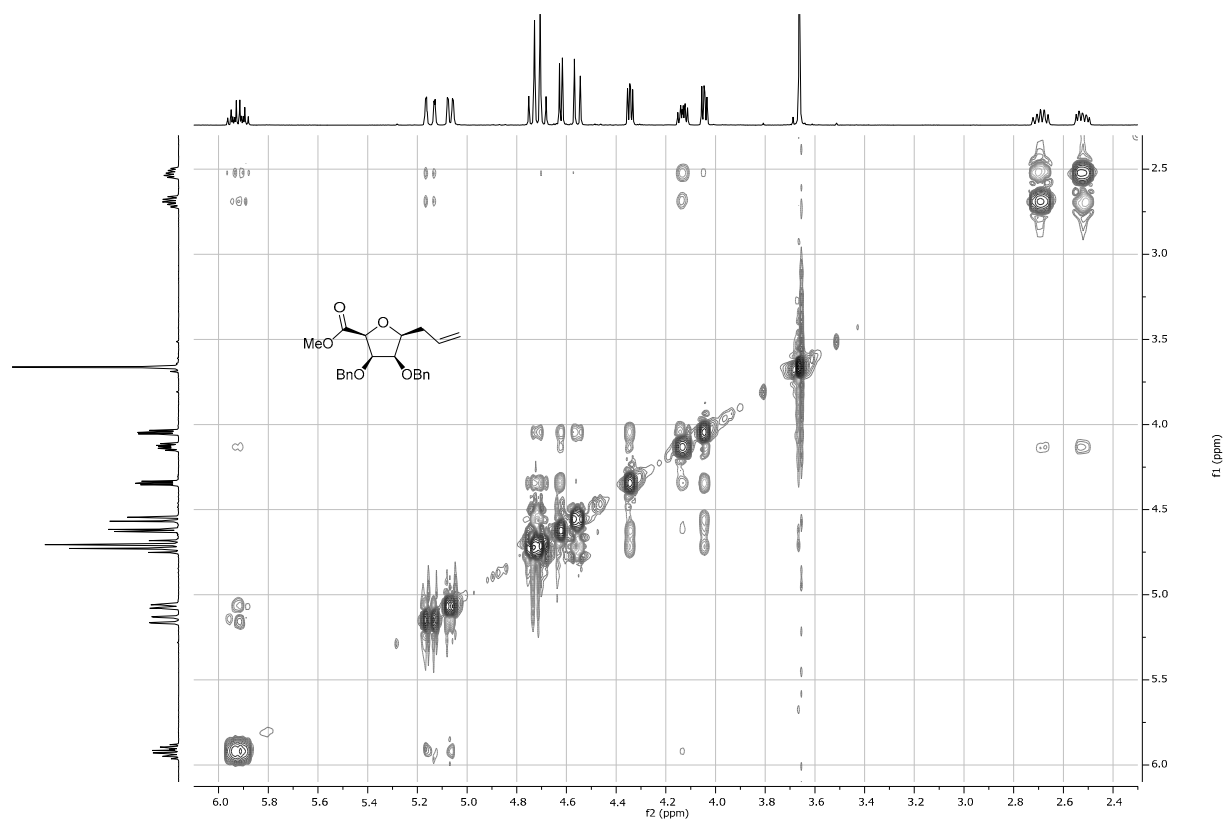

$^1\text{H}$ - $^{13}\text{C}$  HSQC-HECADE of compound **67**

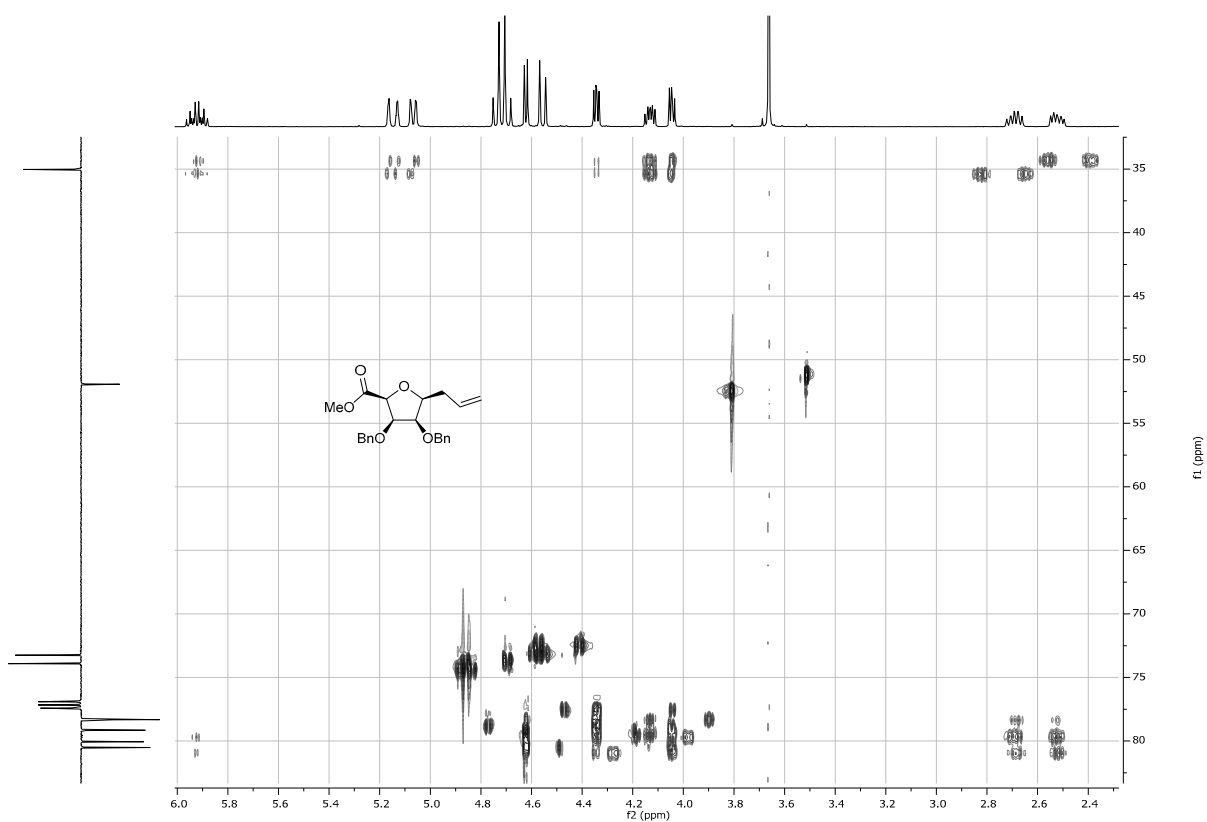



Methyl (1-allyl-2,3-di-O-benzyl-1-deoxy- $\alpha/\beta$ -D-xylofuranosyl uronate) (68)

$^1\text{H}$  NMR, 500 MHz,  $\text{CDCl}_3$  of compound 68

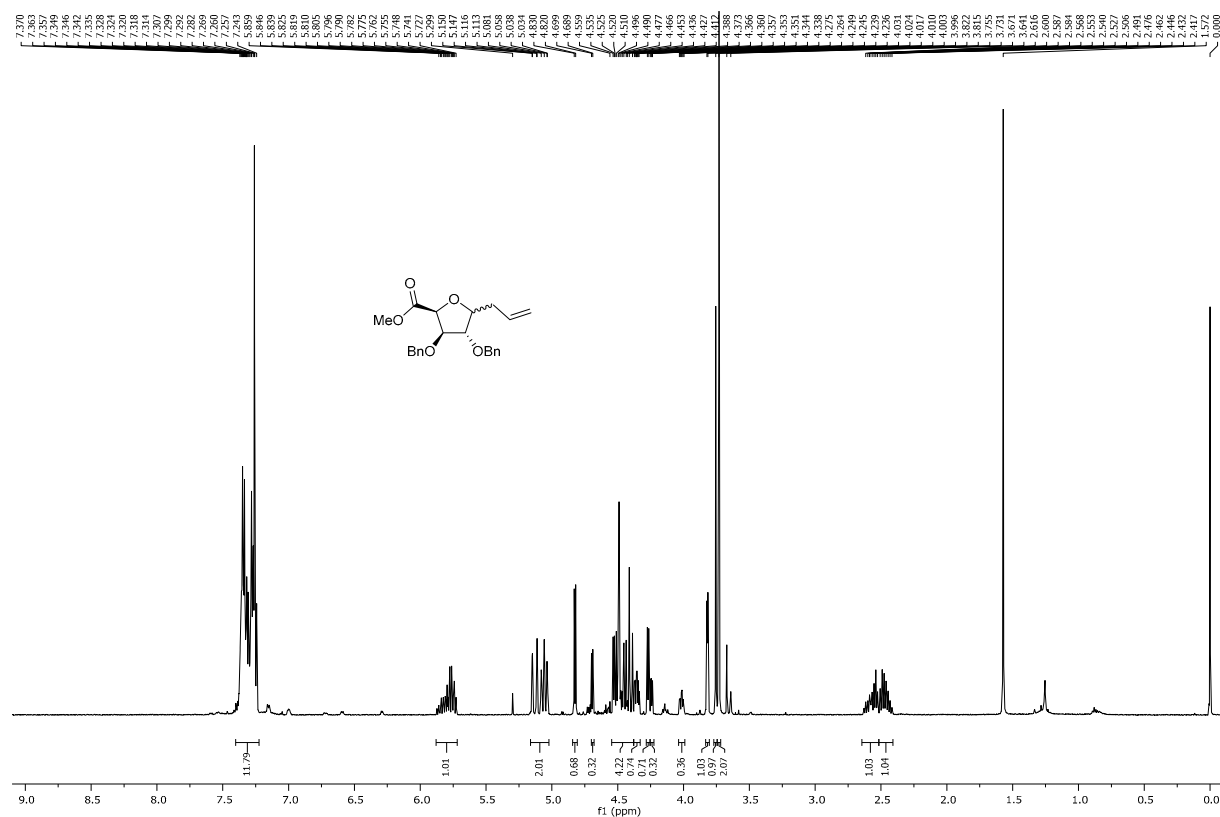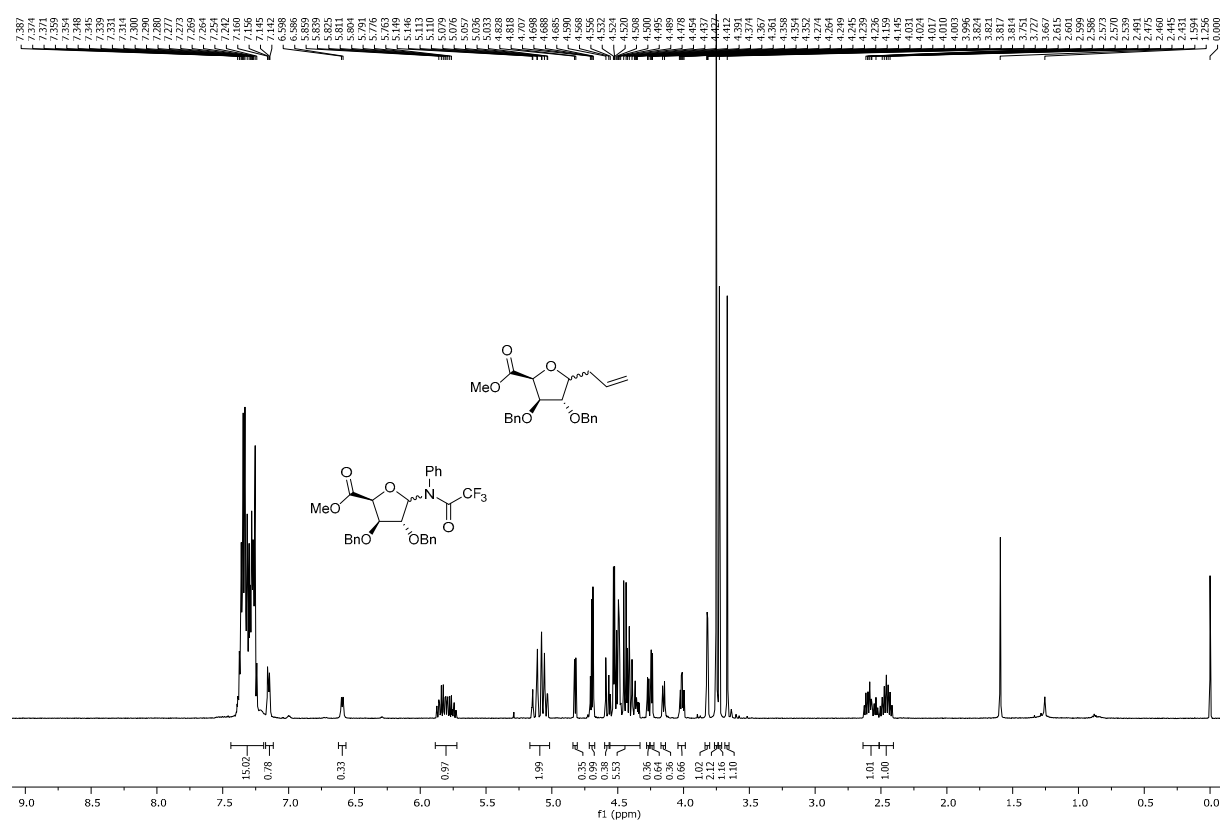

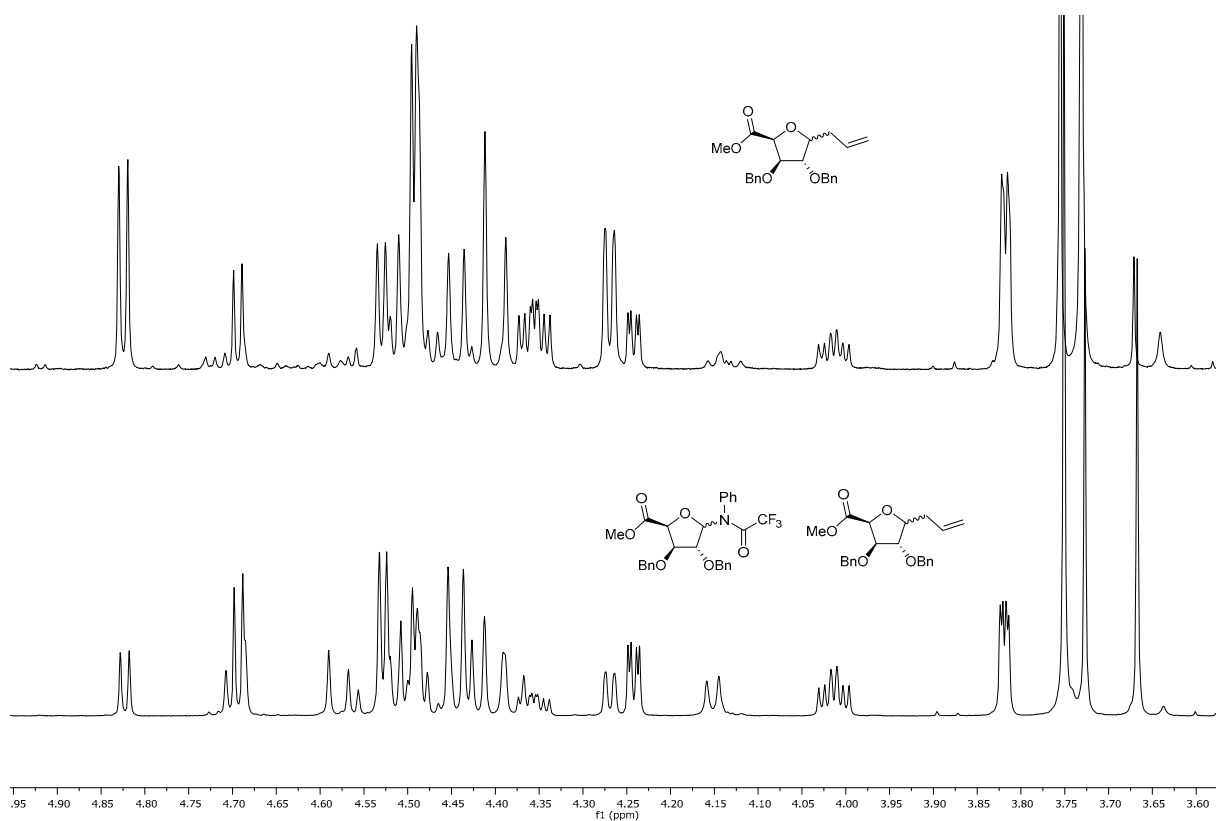

<sup>13</sup>C-APT NMR, 126 MHz, CDCl<sub>3</sub> of compound **68**

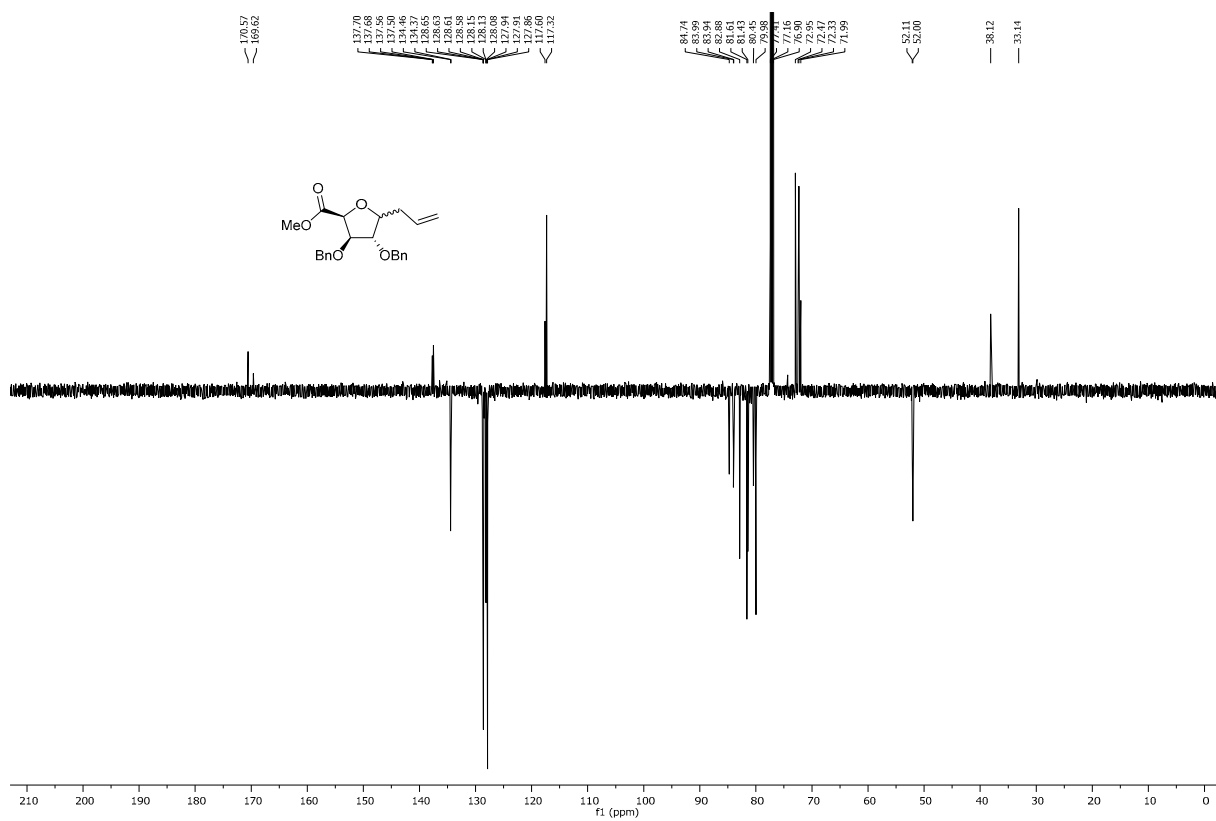

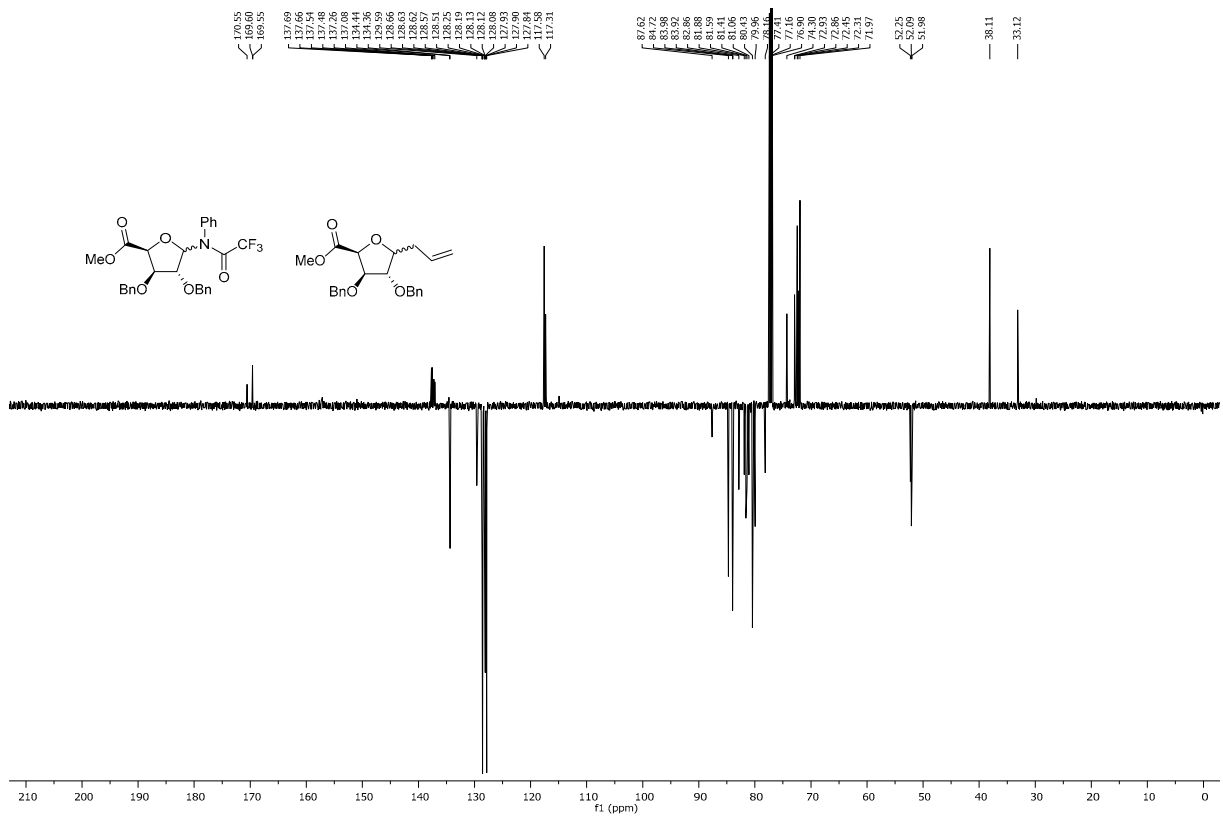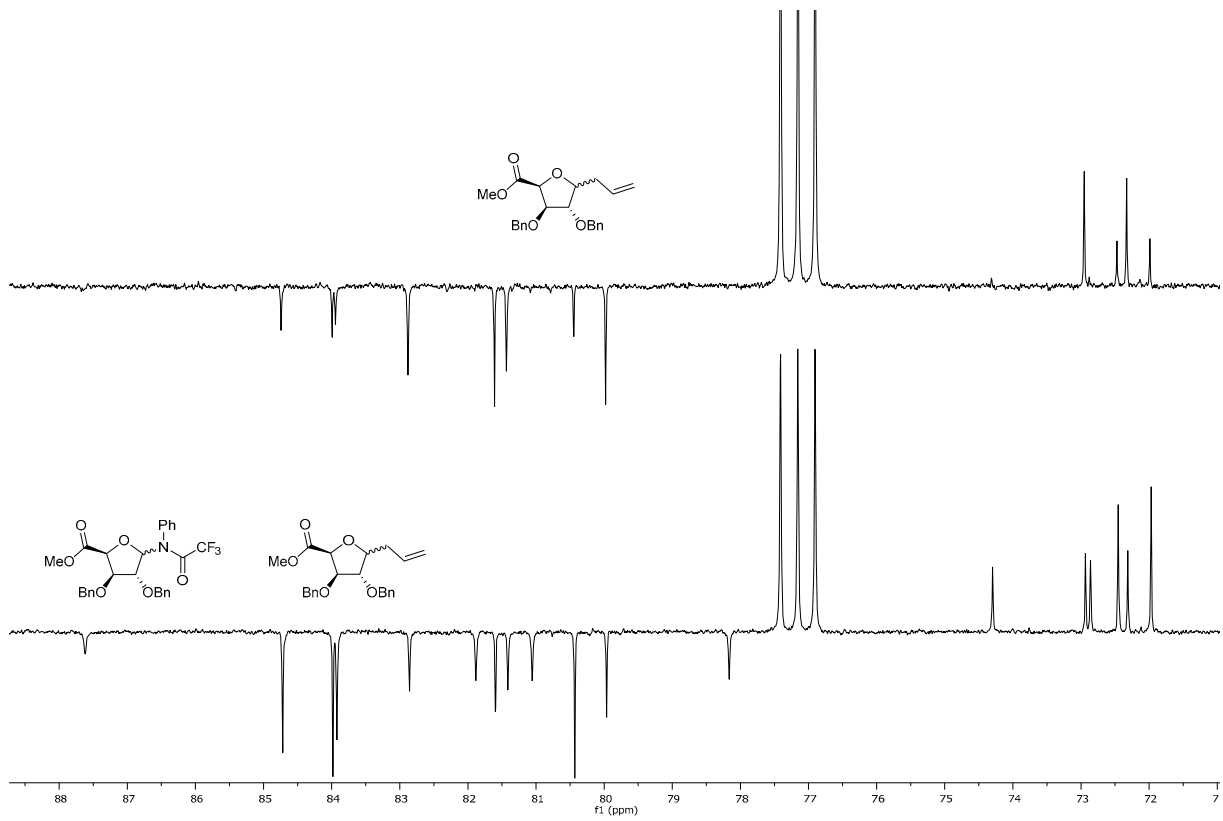

$^1\text{H}$ - $^1\text{H}$  COSY of compound **68**

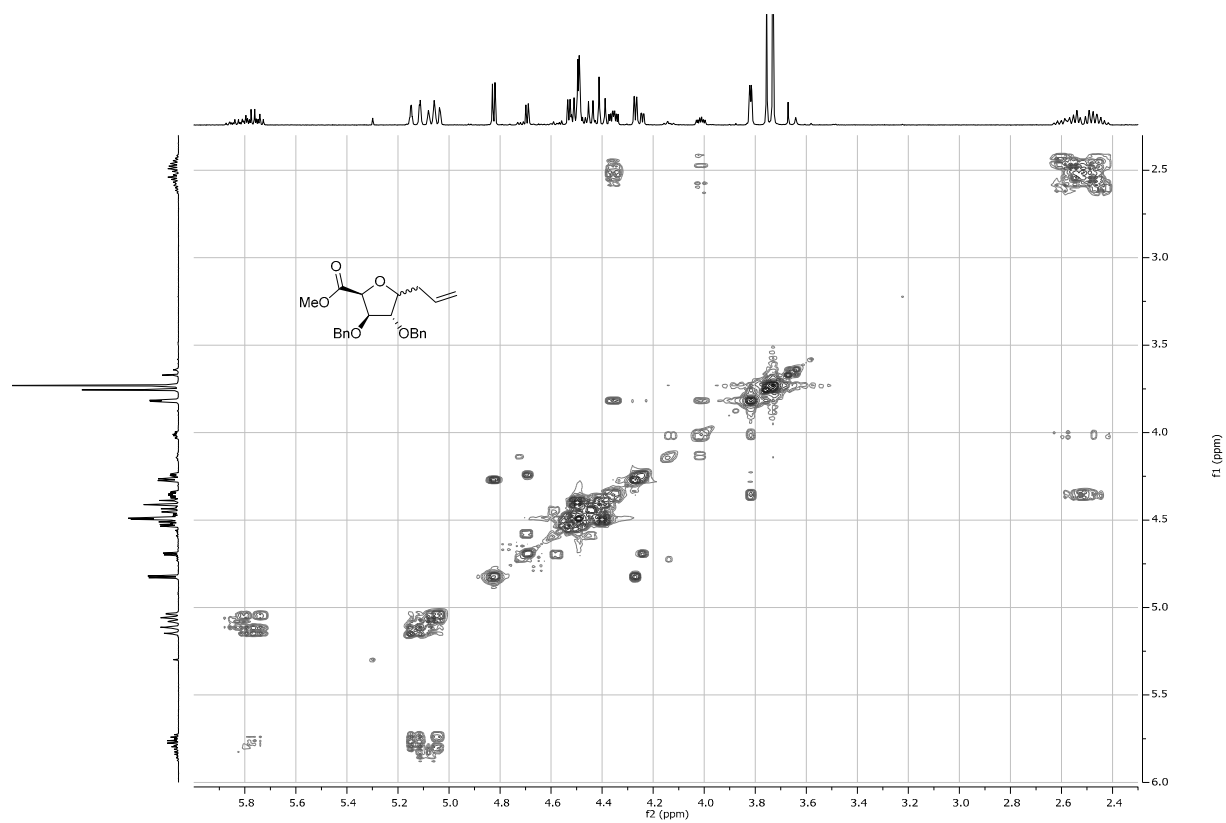

$^1\text{H}$ - $^{13}\text{C}$  HSQC of compound **68**

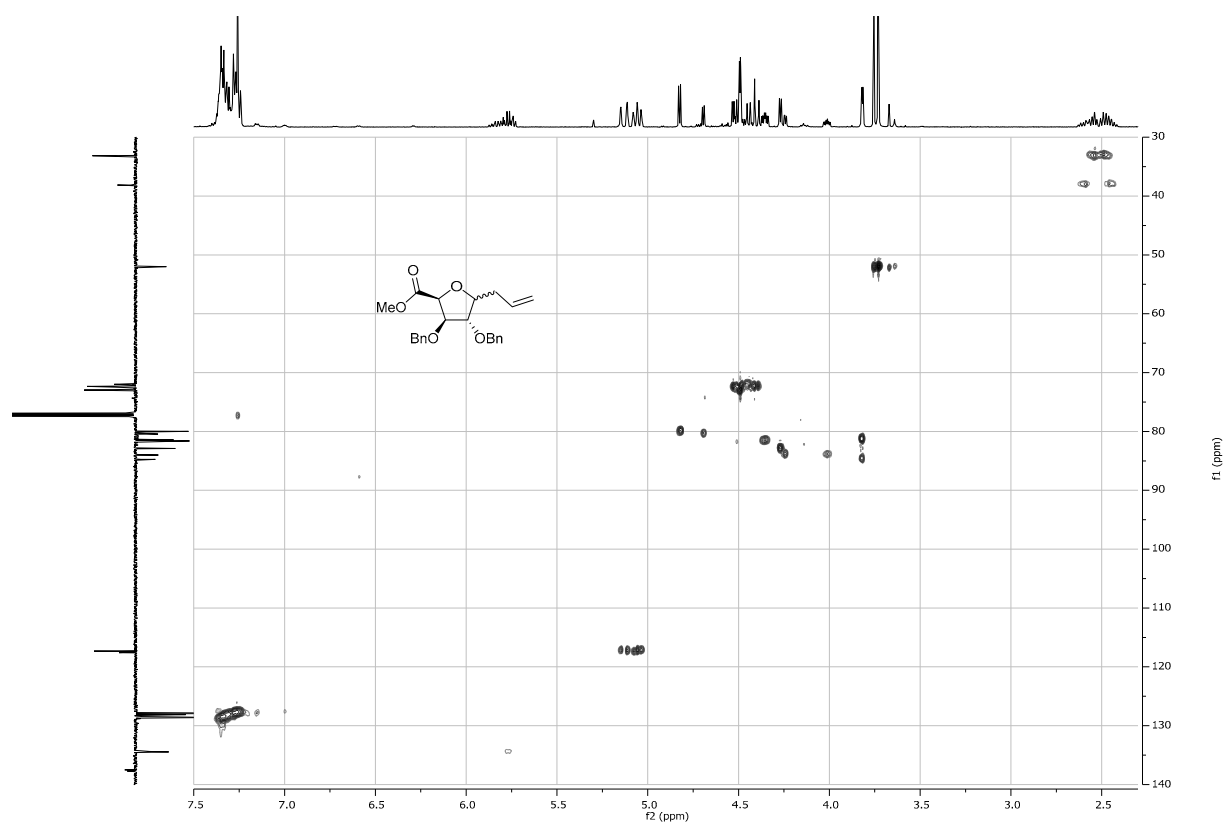

$^1\text{H}$ - $^1\text{H}$  NOESY of compound **68**

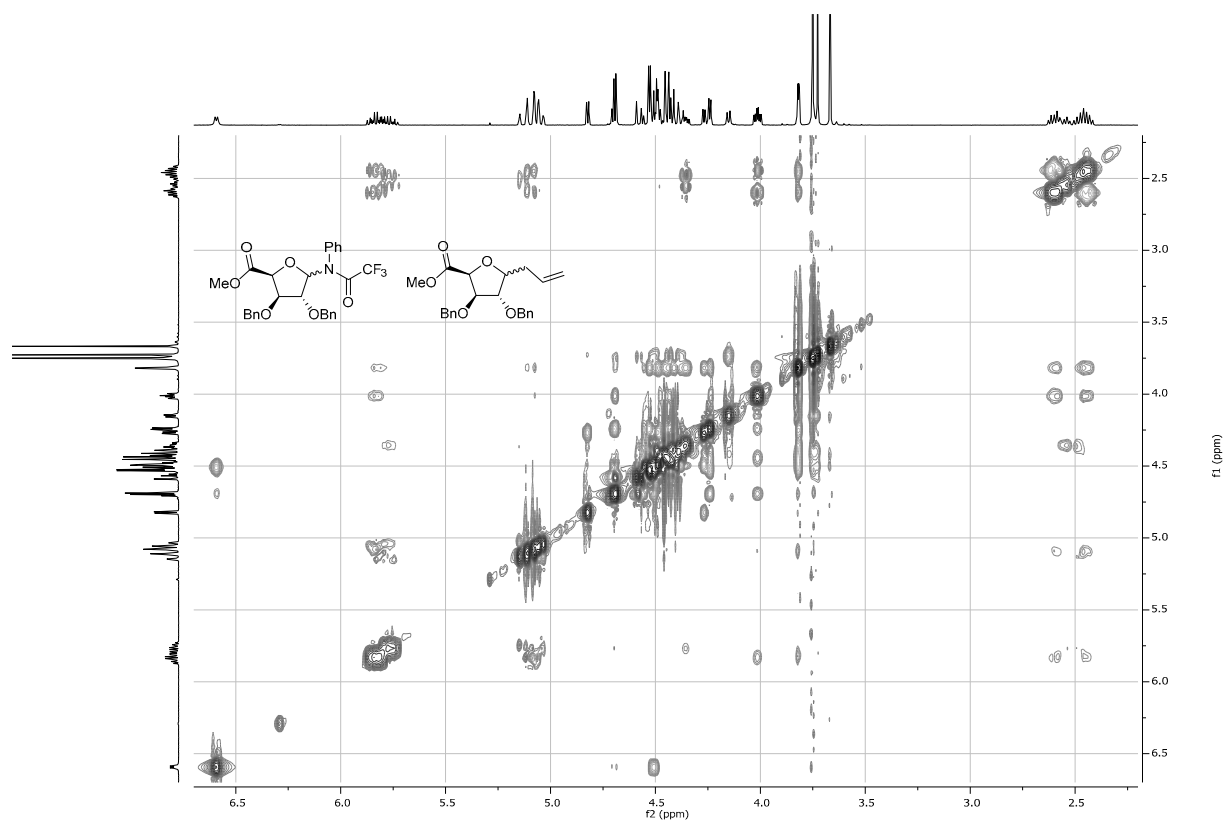

$^1\text{H}$ - $^{13}\text{C}$  HSQC-HECADE of compound **68**

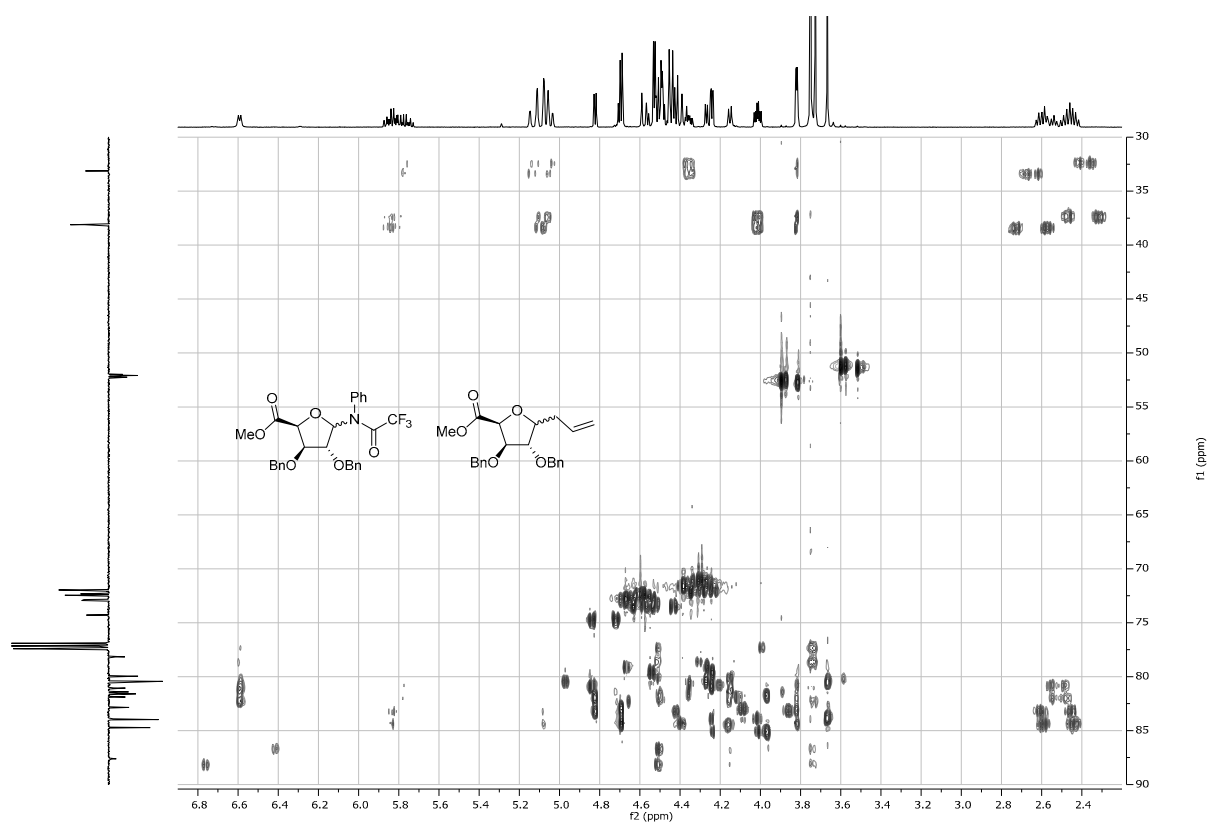

1-[<sup>2</sup>H]-1,4-anhydro-2-azido-3,5-di-O-benzyl-2-deoxy- $\alpha$ -D-ribose (69)

<sup>1</sup>H NMR, 500 MHz, CDCl<sub>3</sub> of compounds 69 and 98

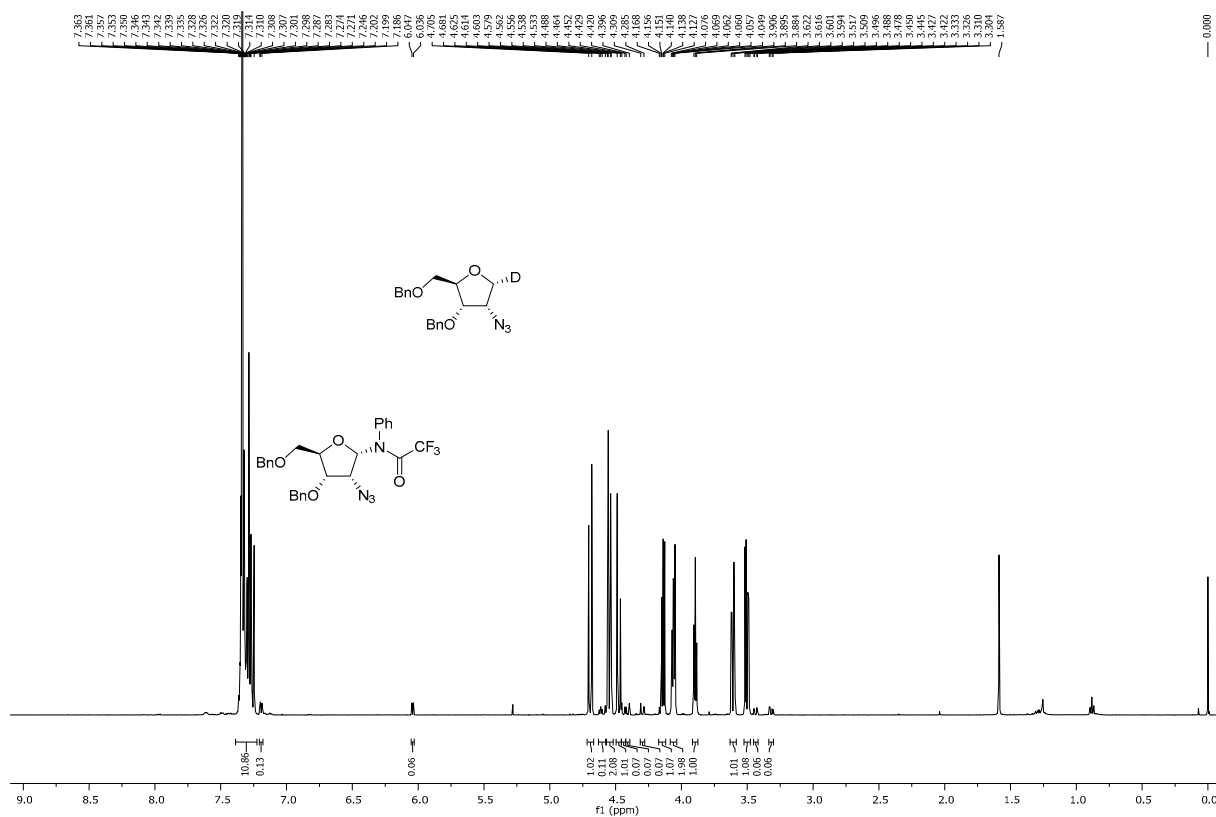

<sup>13</sup>C-APT NMR, 126 MHz, CDCl<sub>3</sub> of compounds 69 and 98

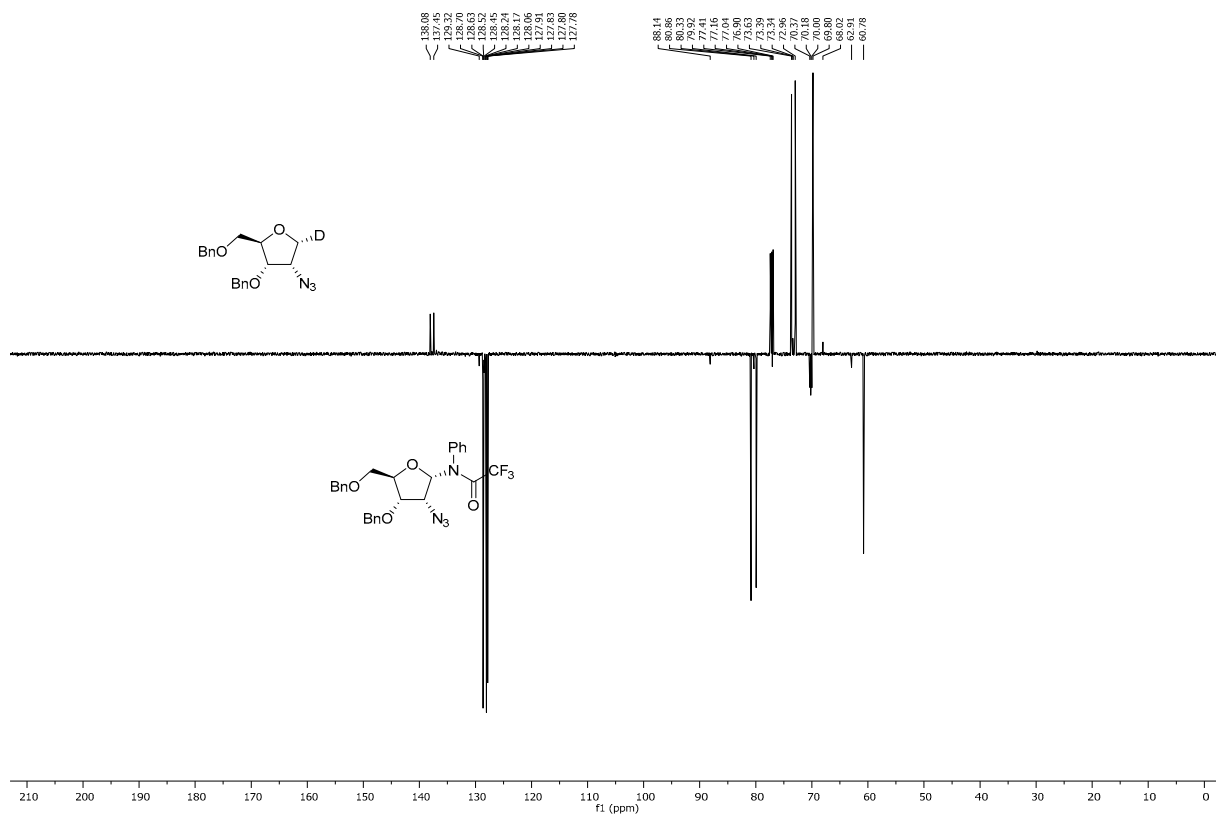

$^1\text{H}$ - $^1\text{H}$  COSY of compounds **69** and **98**

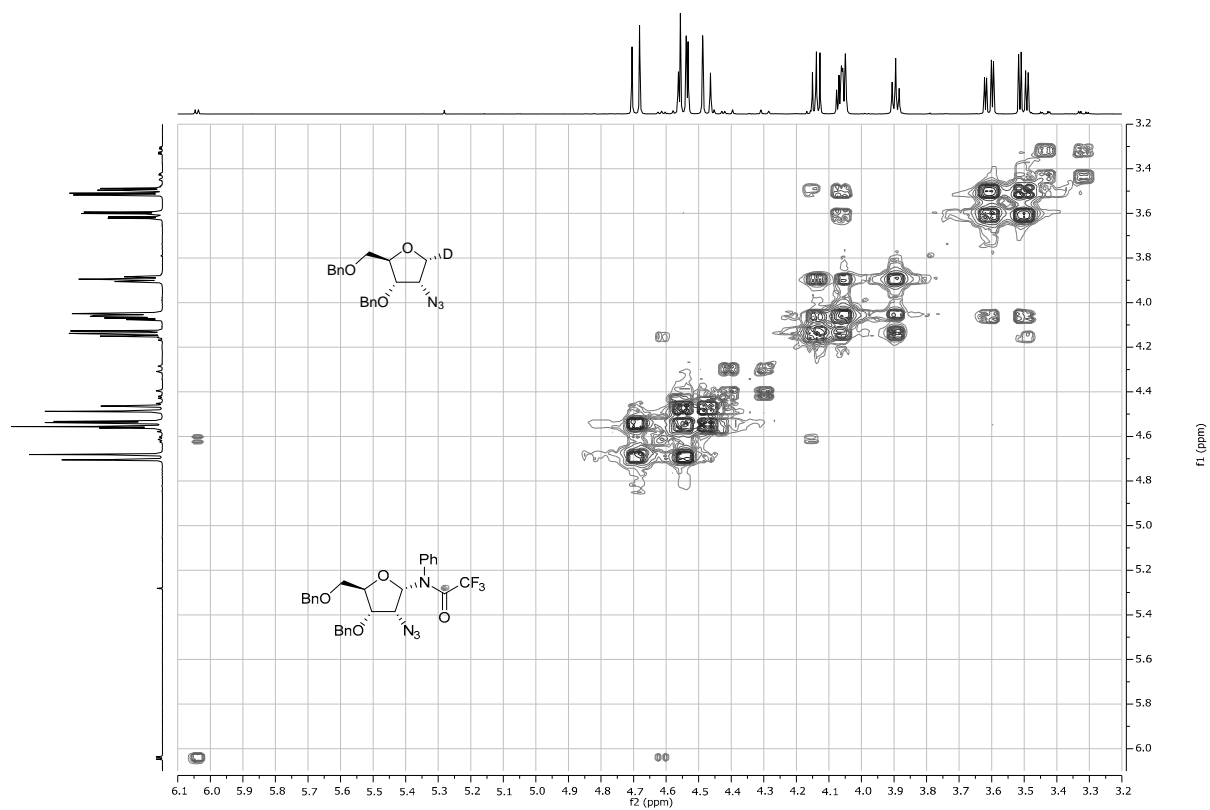

$^1\text{H}$ - $^{13}\text{C}$  HSQC of compounds **69** and **98**

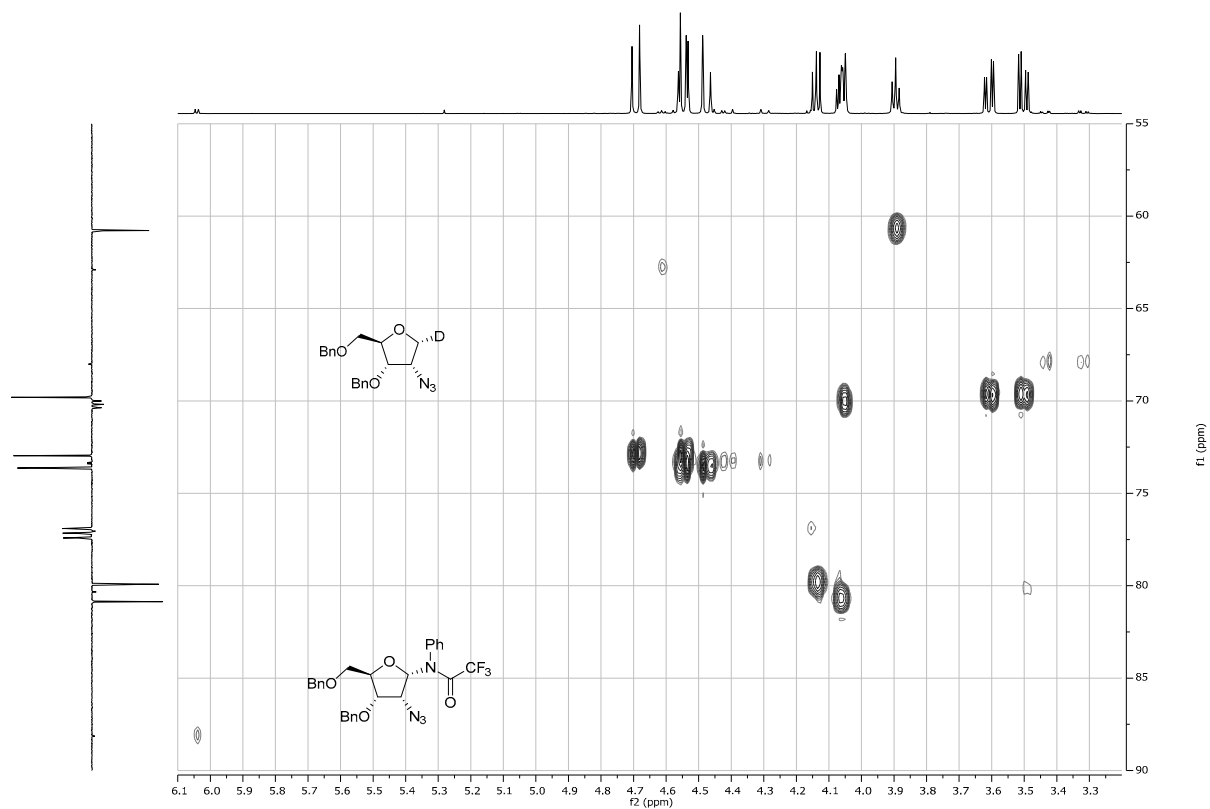

$^1\text{H}$ - $^1\text{H}$  NOESY of compounds **69** and **98**

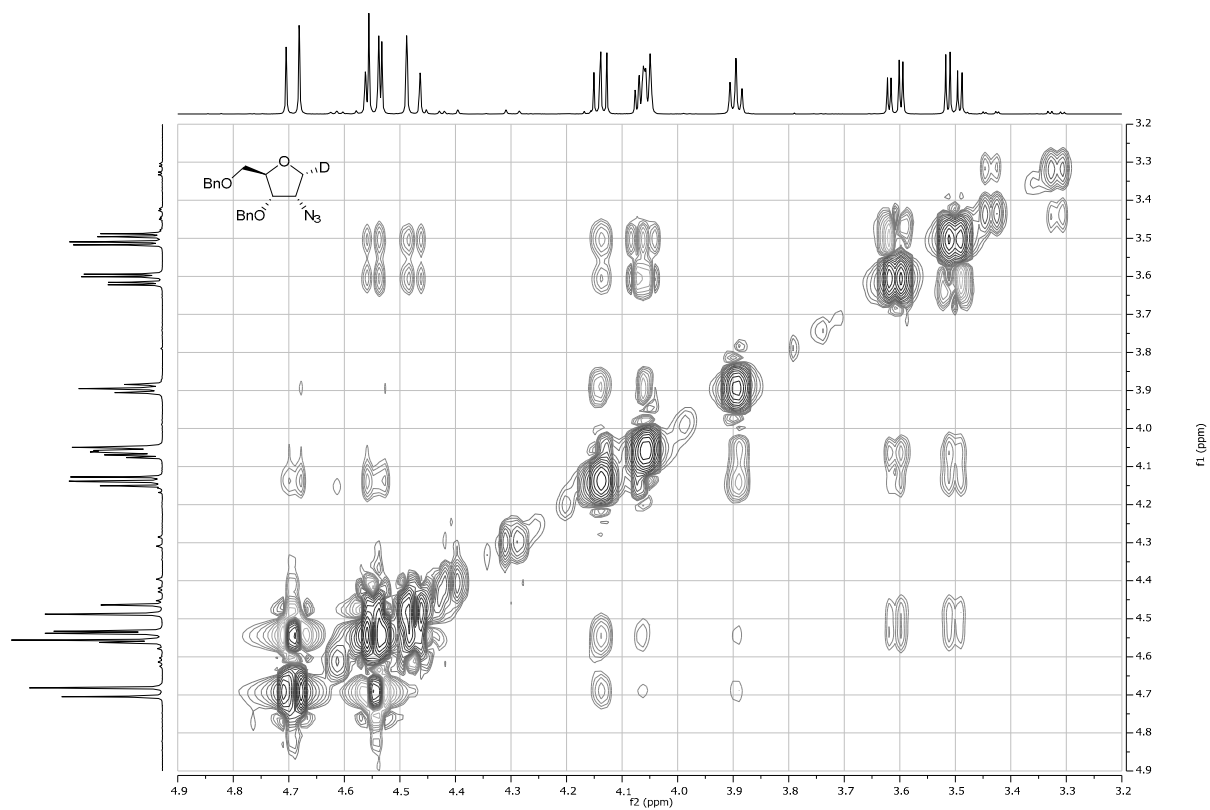

$^1\text{H}$ - $^{13}\text{C}$  HSQC-HECADE of compounds **69** and **98**

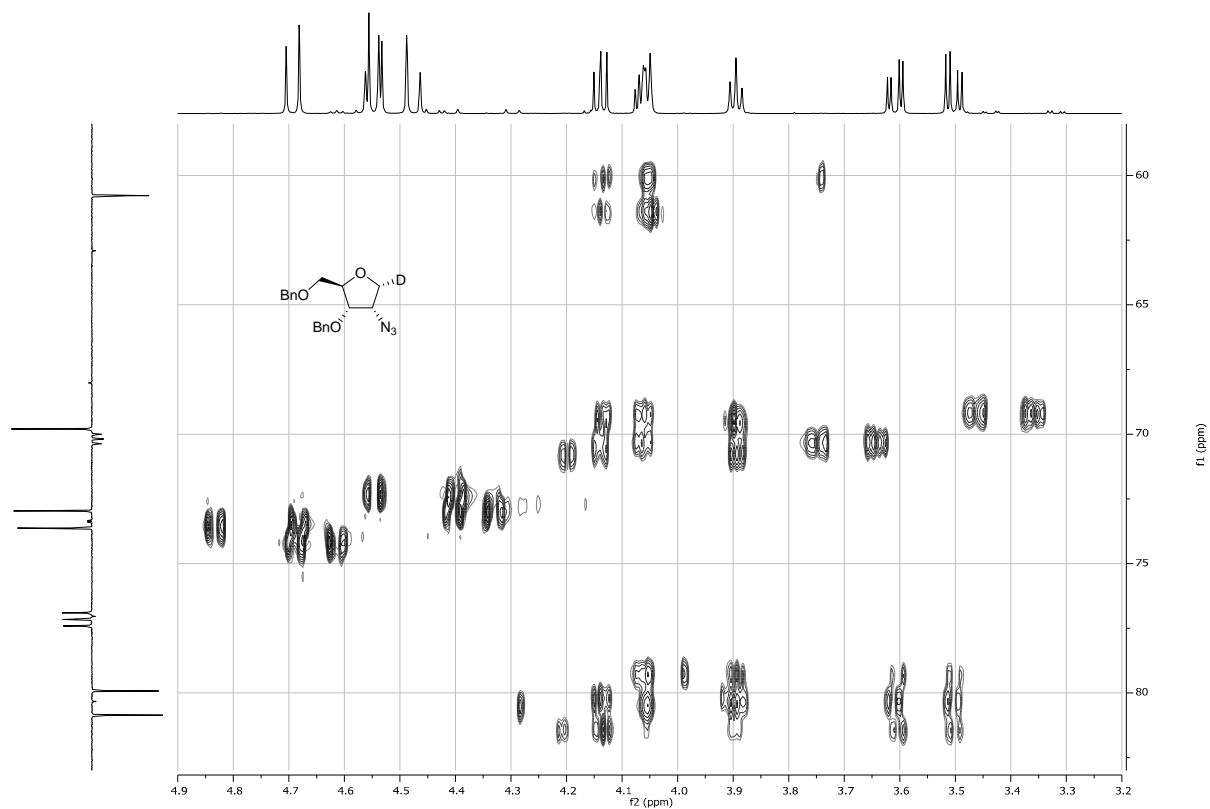



$^2\text{H}$  NMR, 77 MHz,  $\text{CHCl}_3$  of compound **69**

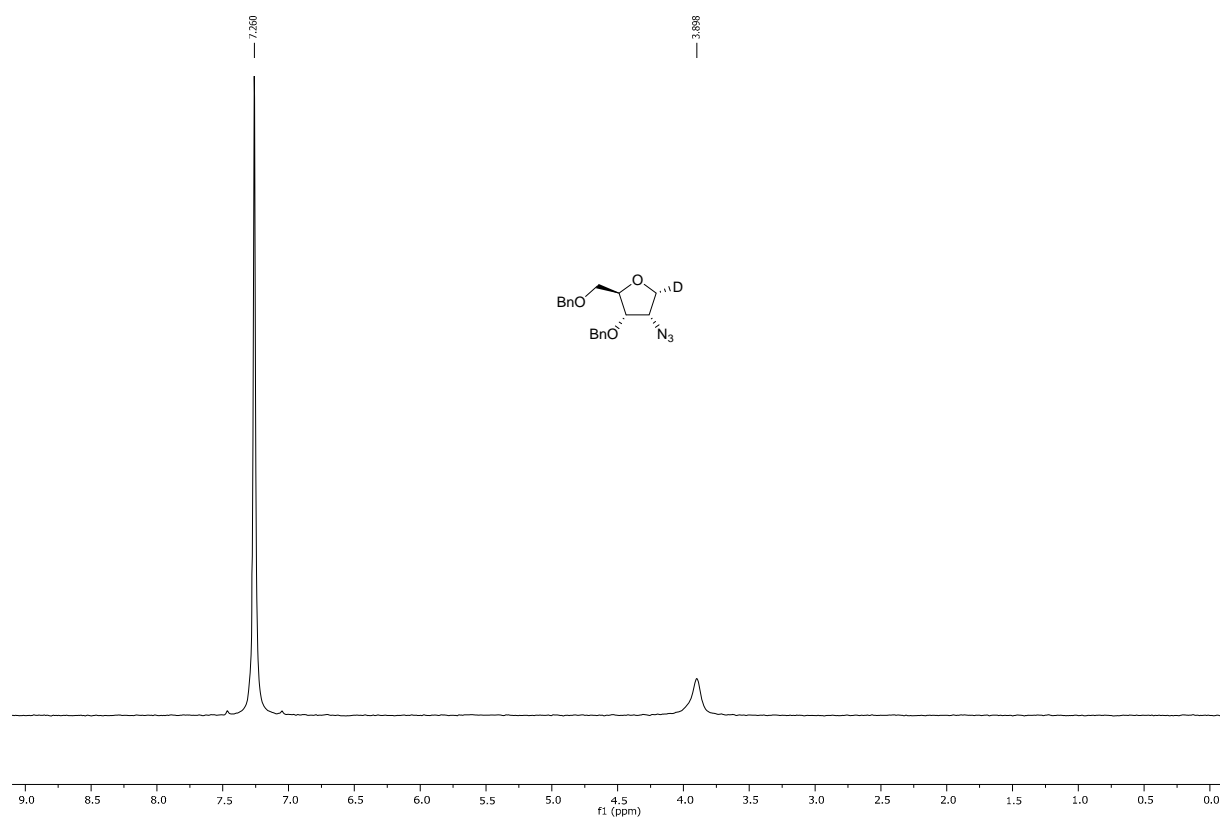

1- $^2\text{H}$ -1,4-anhydro-2-azido-3,5-di-*O*-benzyl-2-deoxy- $\beta$ -D-arabitol (**70**)

$^1\text{H}$  NMR, 500 MHz,  $\text{CDCl}_3$  of compound **70**

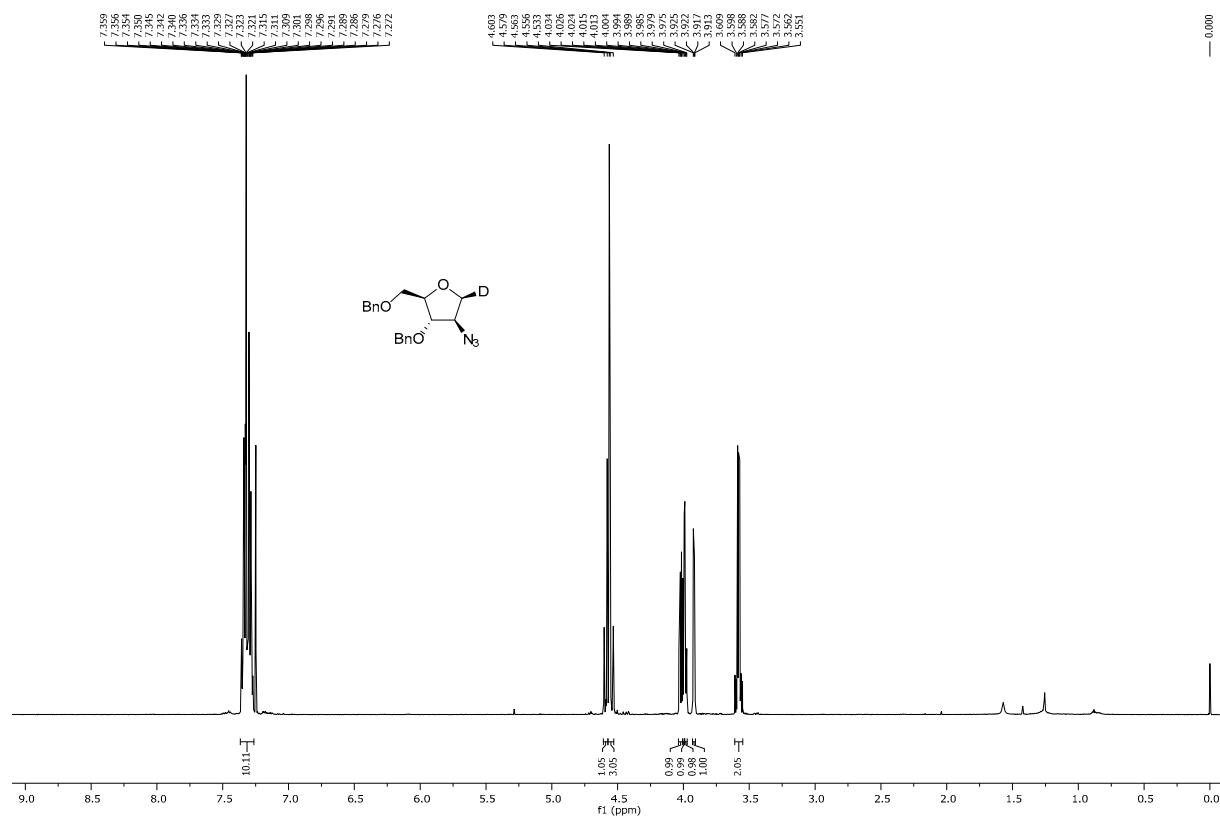

$^{13}\text{C}$ -APT NMR, 126 MHz,  $\text{CDCl}_3$  of compound **70**

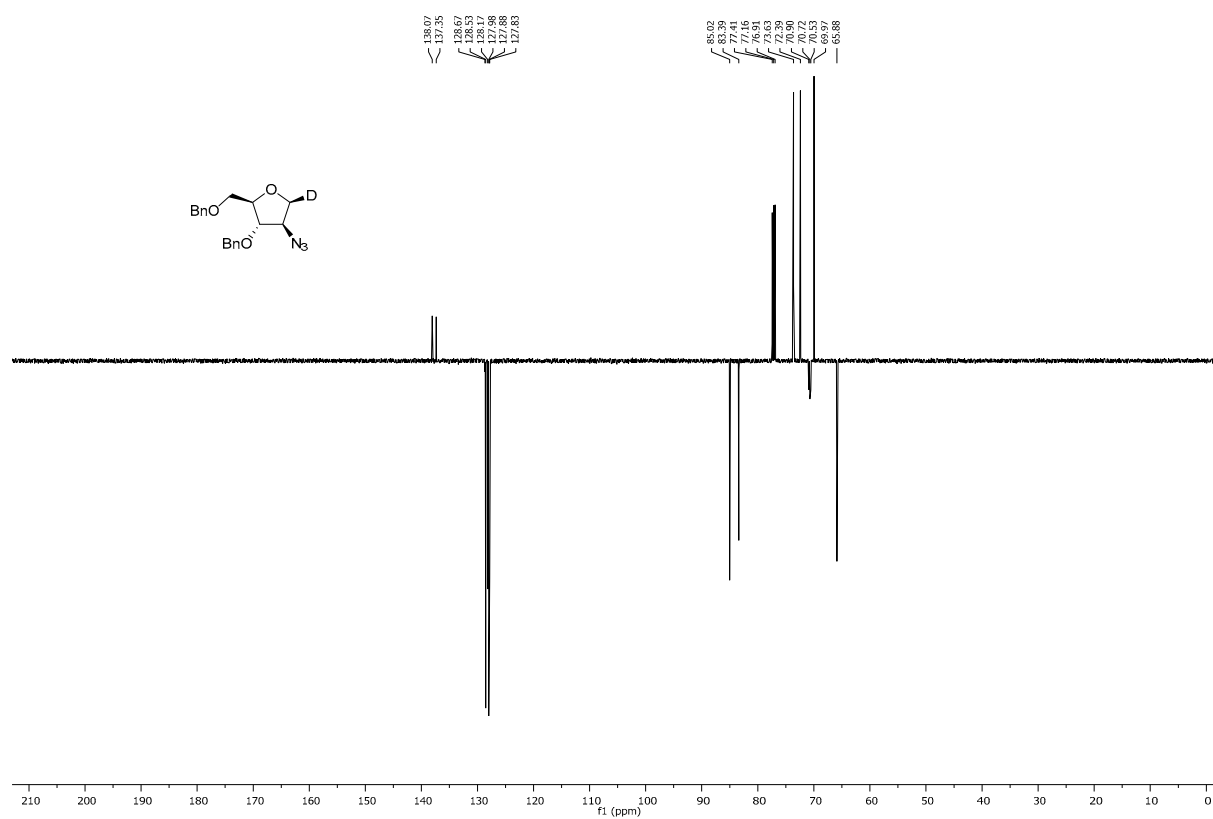

$^1\text{H}$ - $^1\text{H}$  COSY of compound **70**

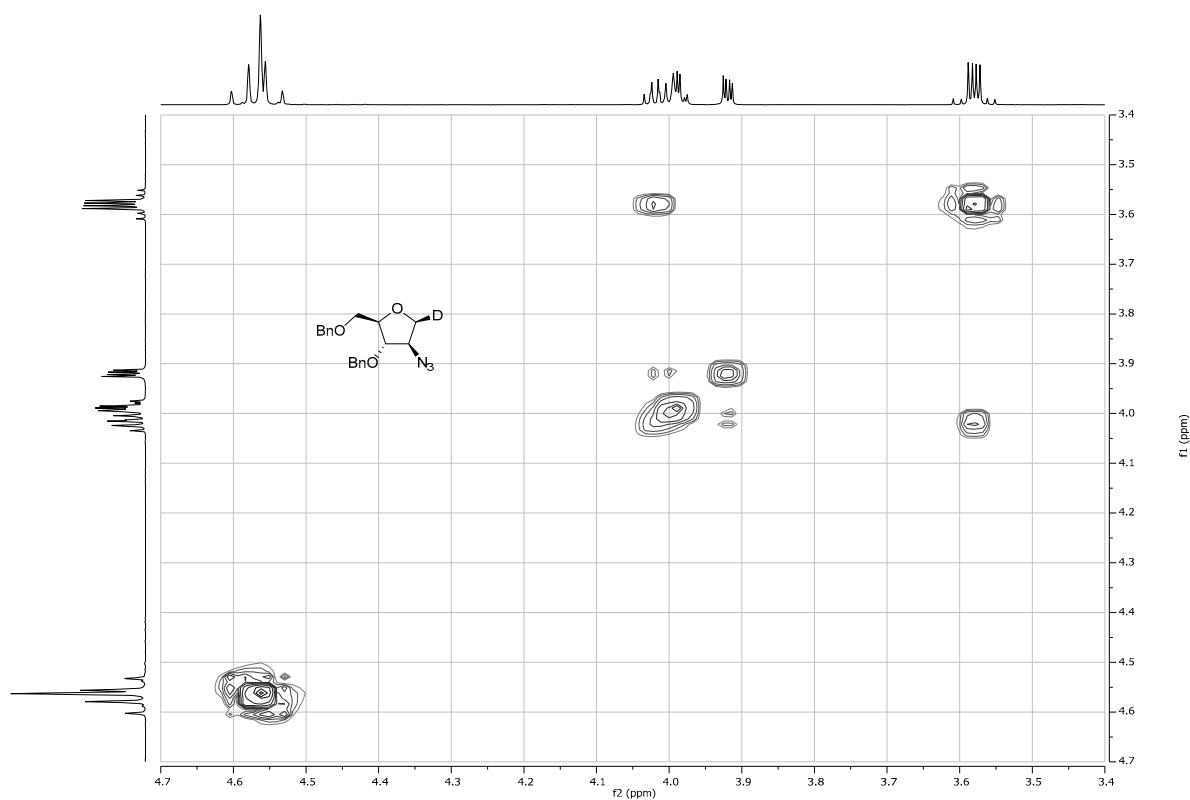

$^1\text{H}$ - $^{13}\text{C}$  HSQC of compound **70**

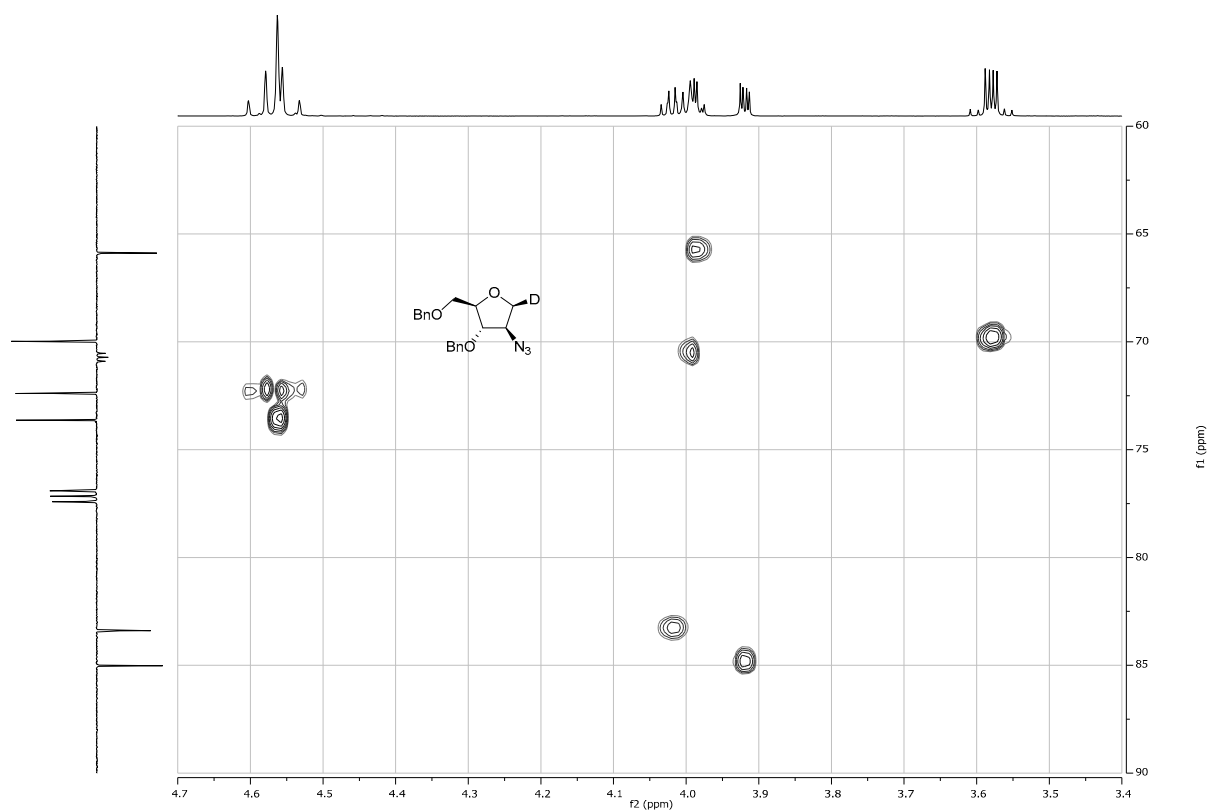

$^1\text{H}$ - $^{13}\text{C}$  HMBC of compound **70**

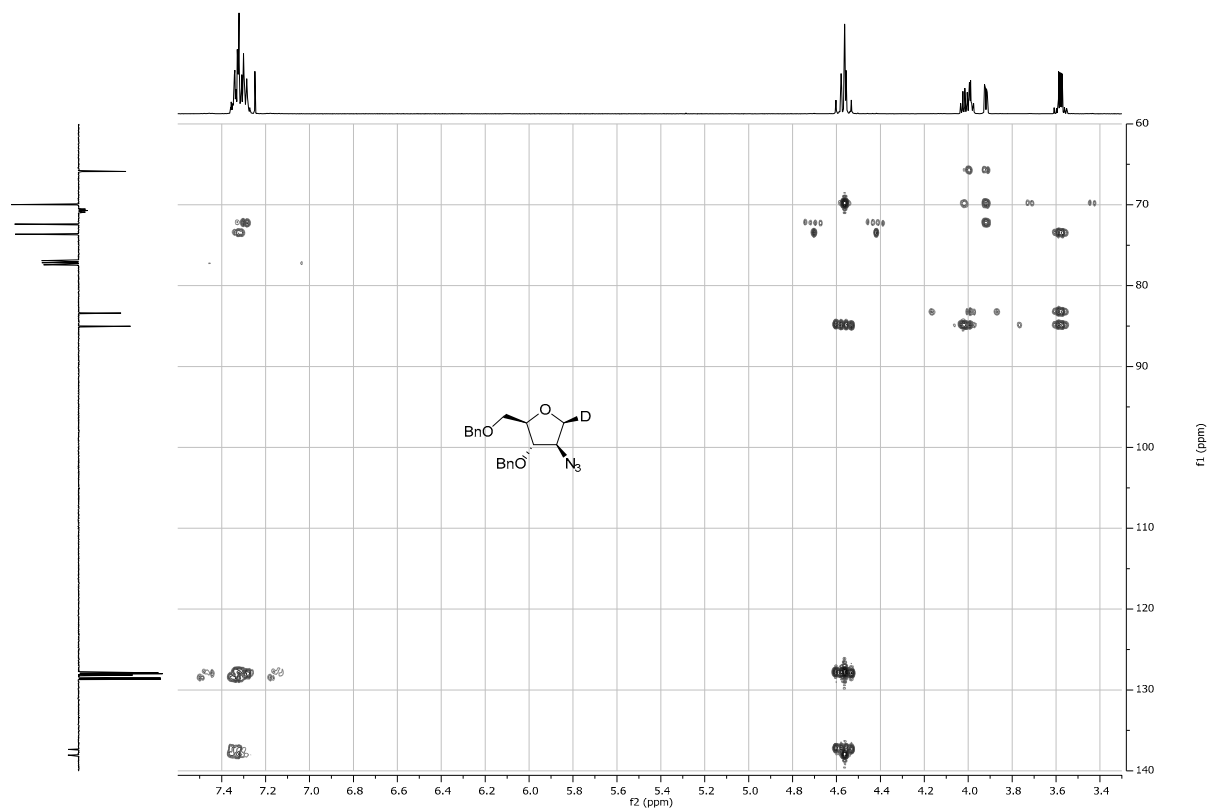

$^1\text{H}$ - $^1\text{H}$  NOESY of compound **70**

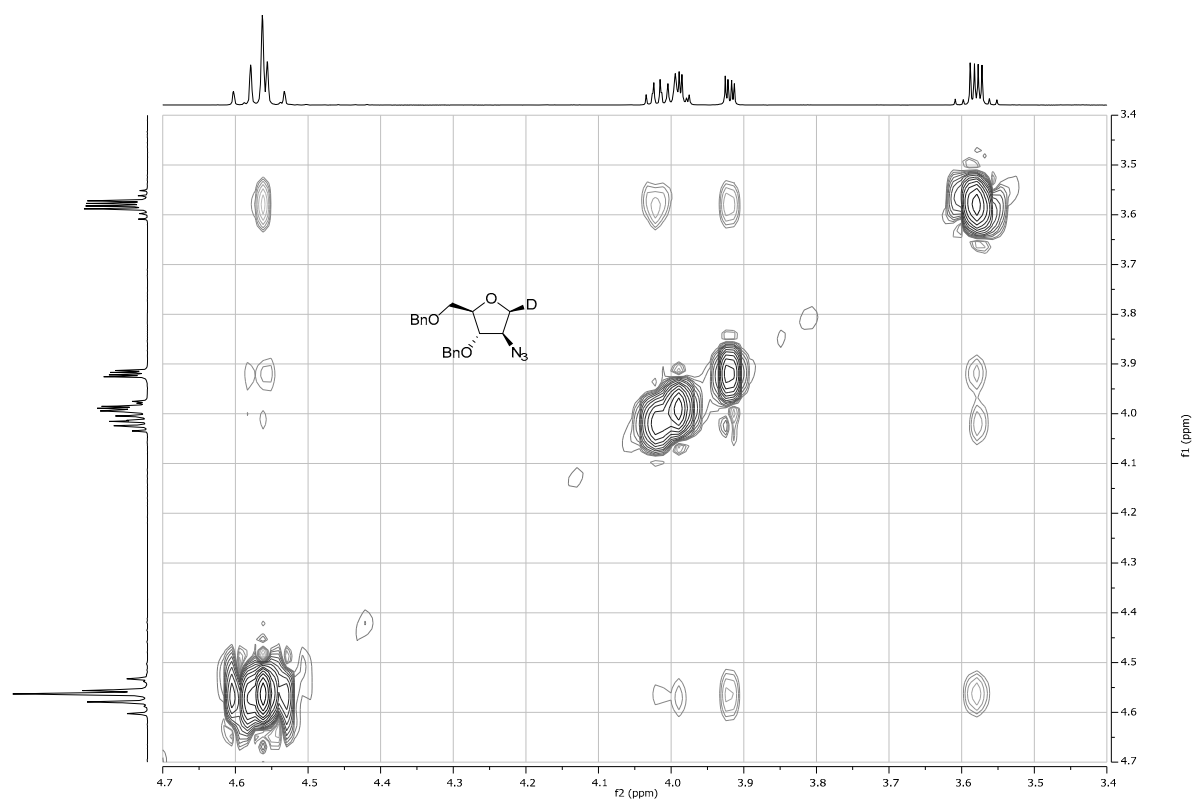

$^1\text{H}$ - $^{13}\text{C}$  HSQC-HECADE of compound **70**

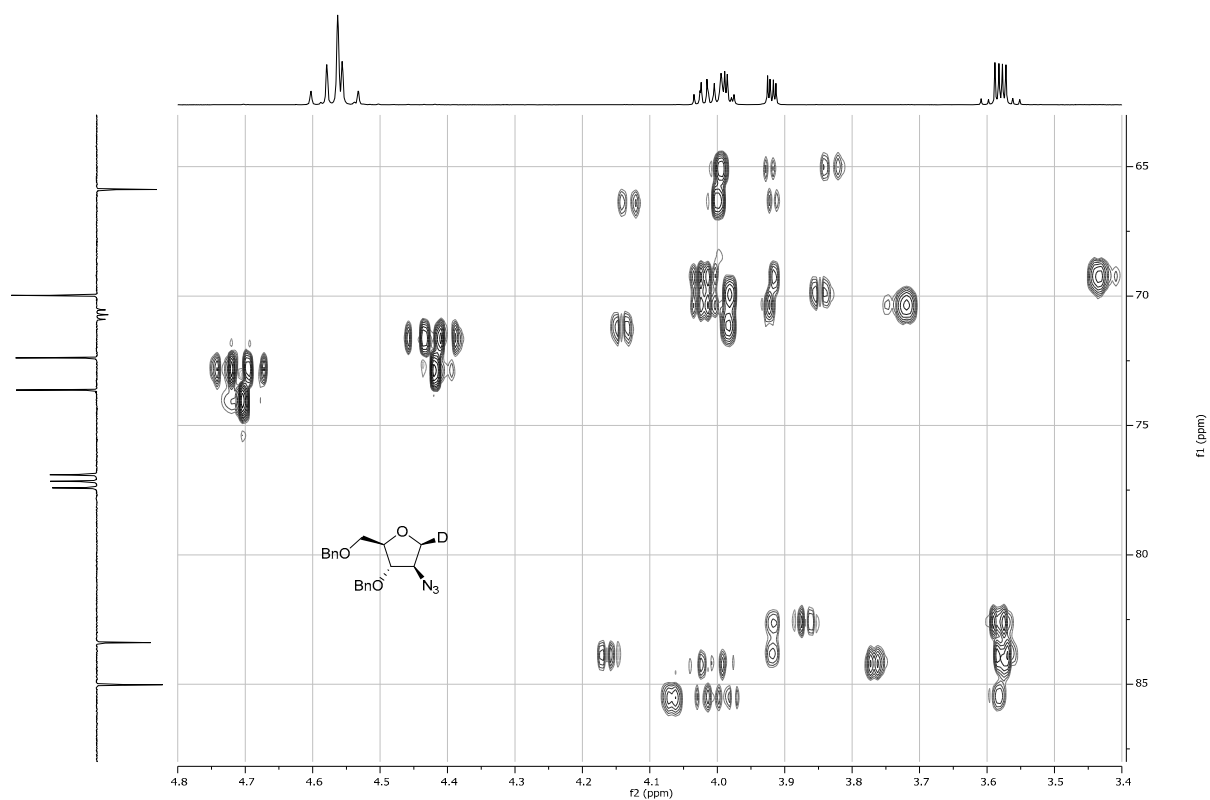

1-[<sup>2</sup>H]-1,4-anhydro-2-azido-3,5-di-O-benzyl-2-deoxy-β-D-lyxitol (71)

<sup>1</sup>H NMR, 500 MHz, CDCl<sub>3</sub> of compound 71

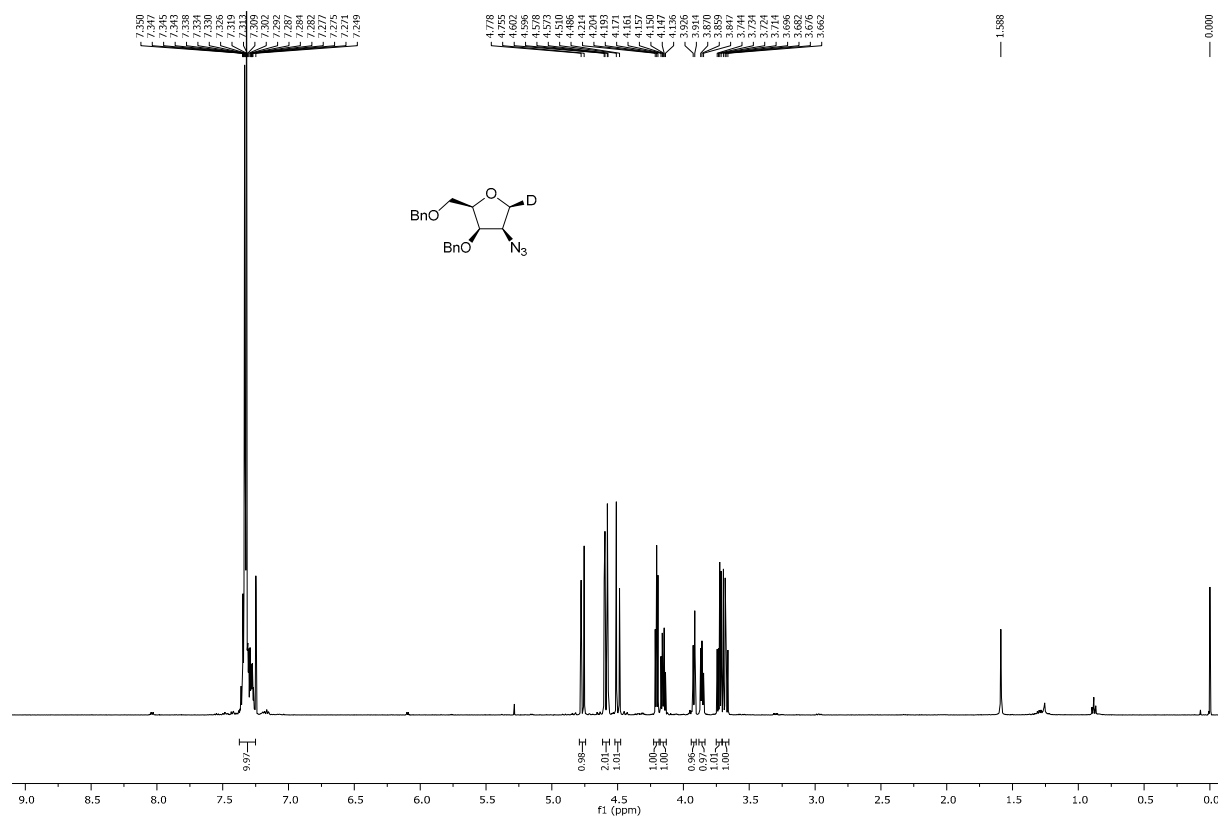

<sup>13</sup>C-APT NMR, 126 MHz, CDCl<sub>3</sub> of compound 71

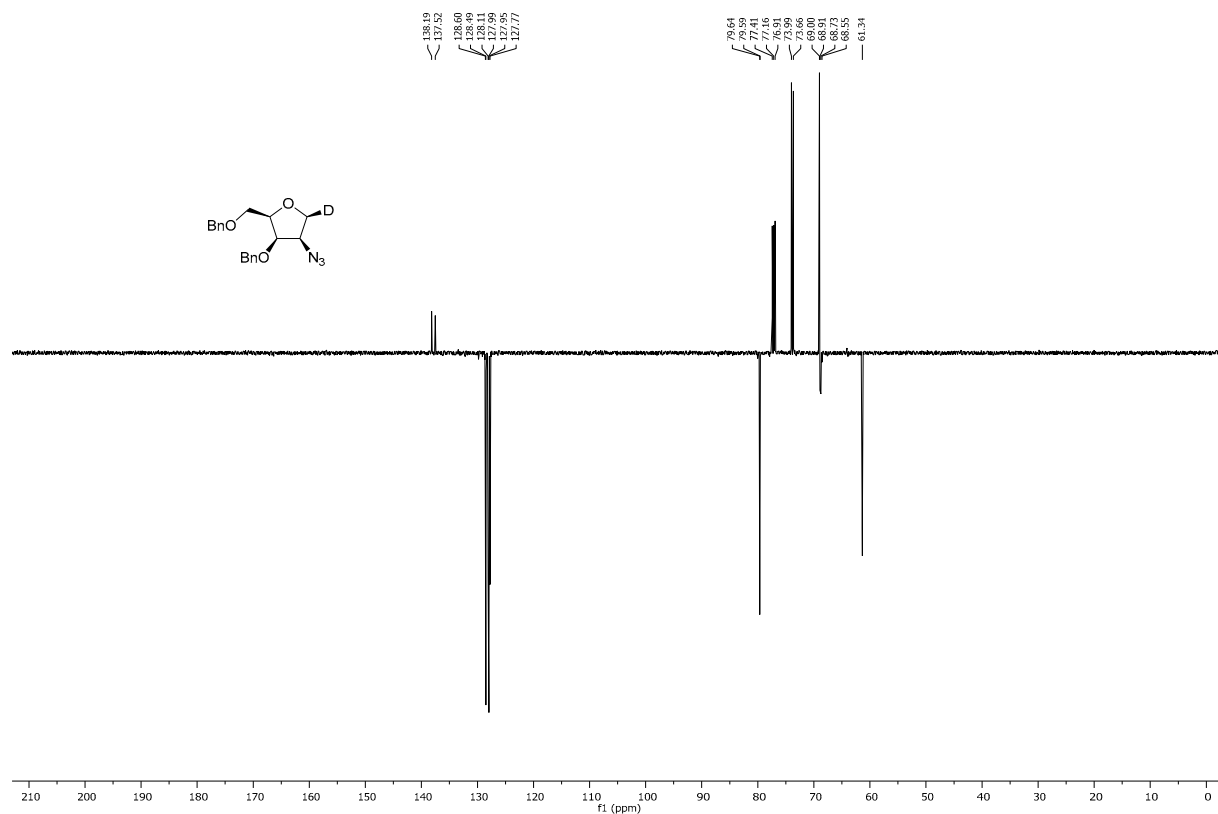

$^1\text{H}$ - $^1\text{H}$  COSY of compound **71**

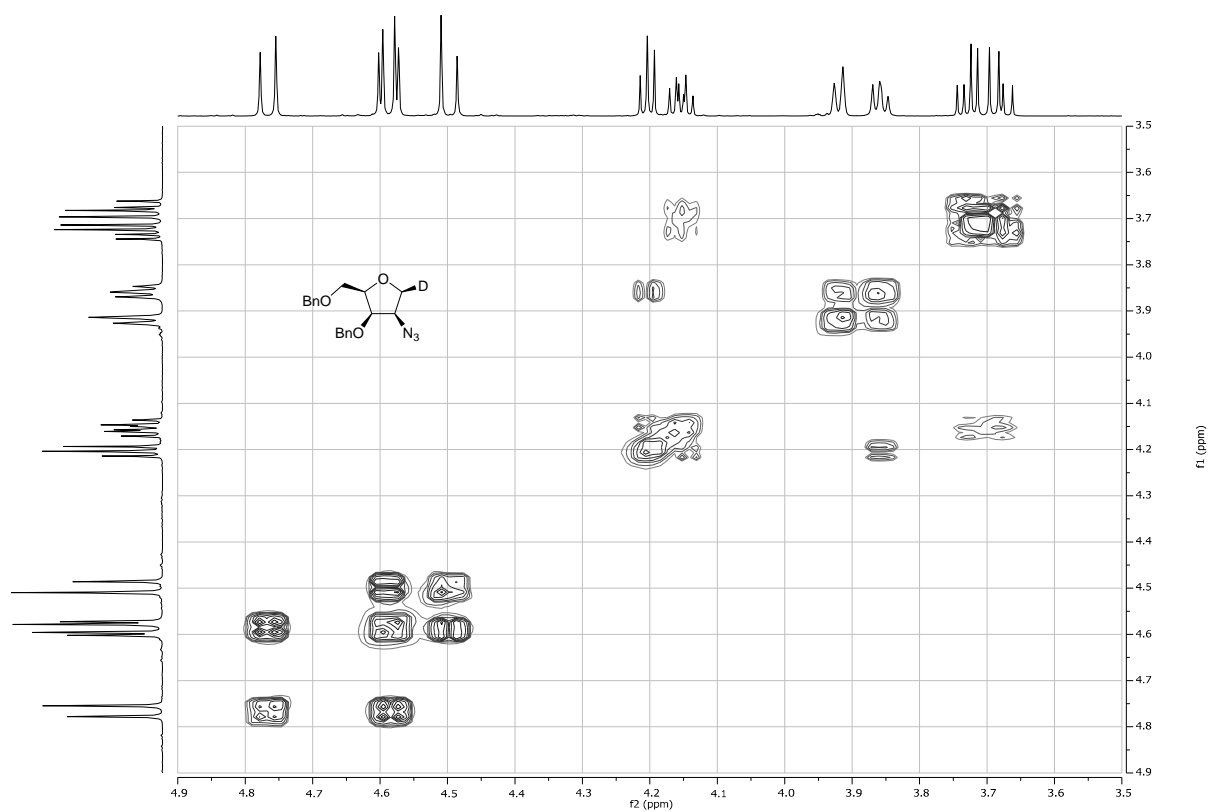

$^1\text{H}$ - $^{13}\text{C}$  HSQC of compound **71**

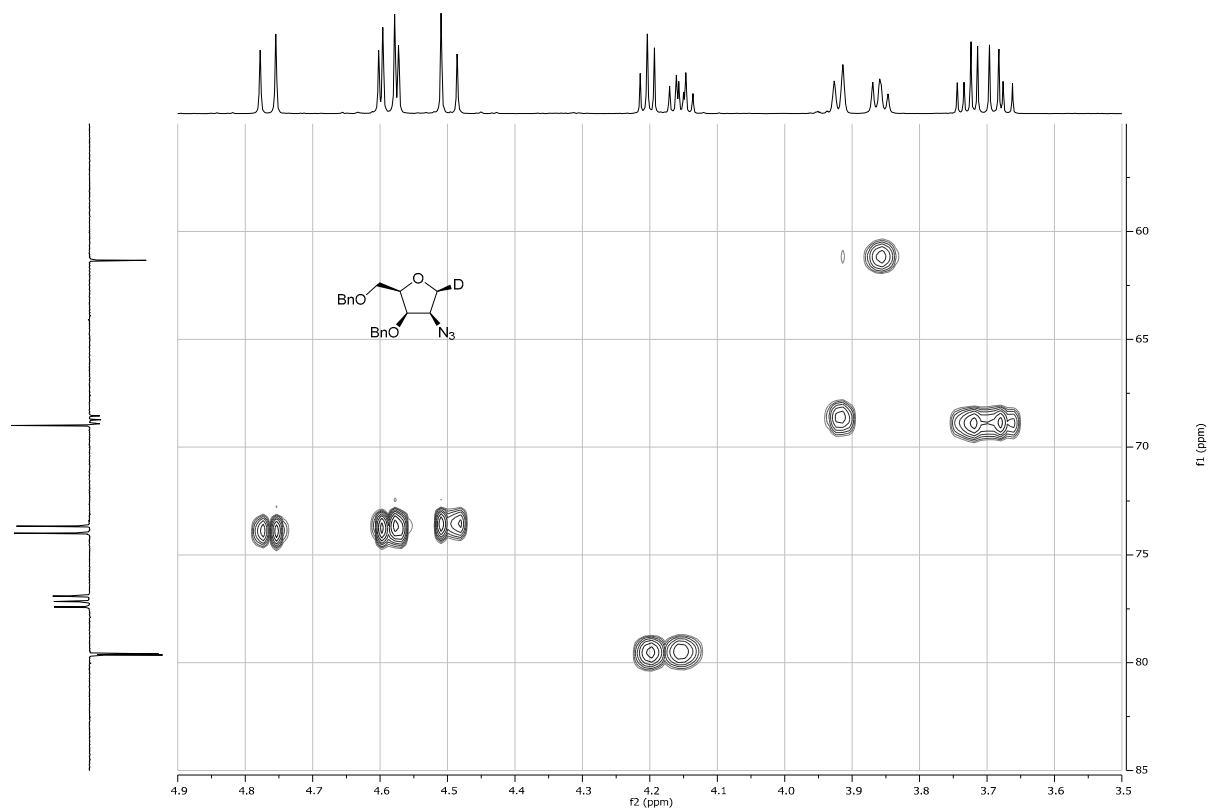

$^1\text{H}$ - $^1\text{H}$  NOESY of compound **71**

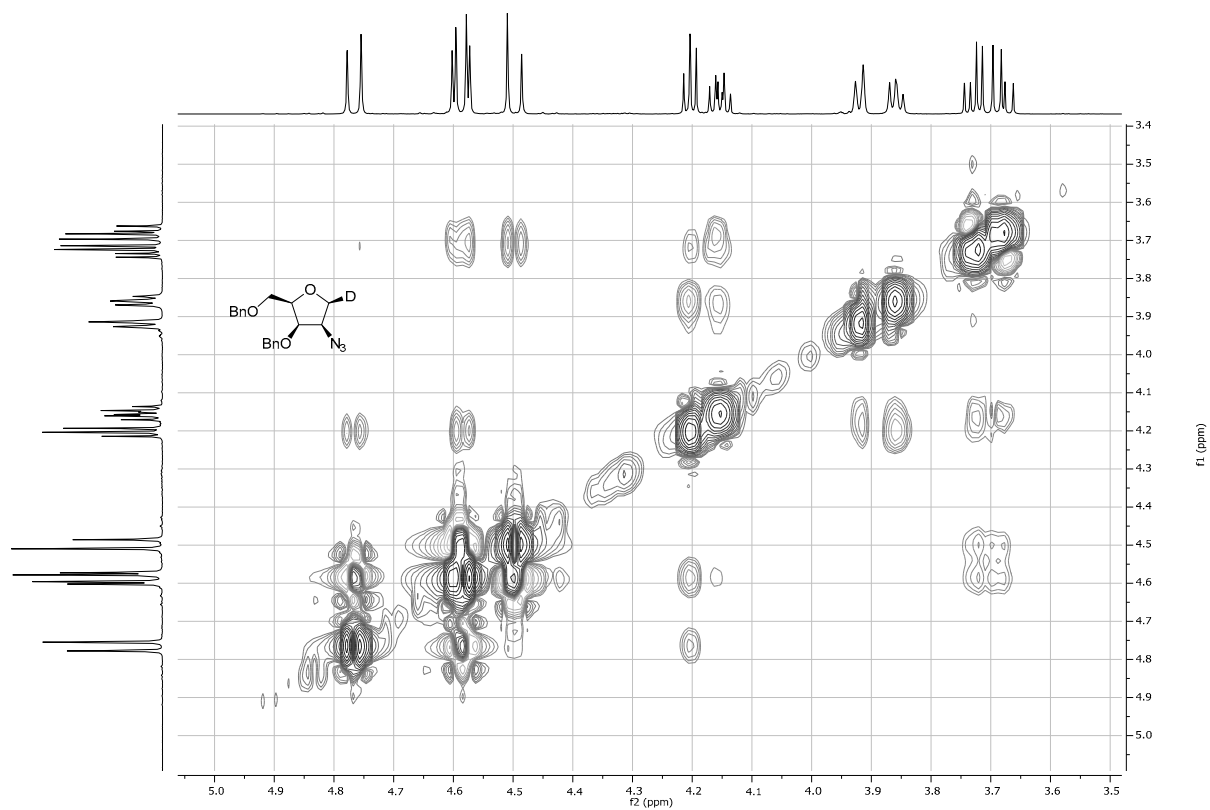

$^1\text{H}$ - $^{13}\text{C}$  HSQC-HECADE of compound **71**

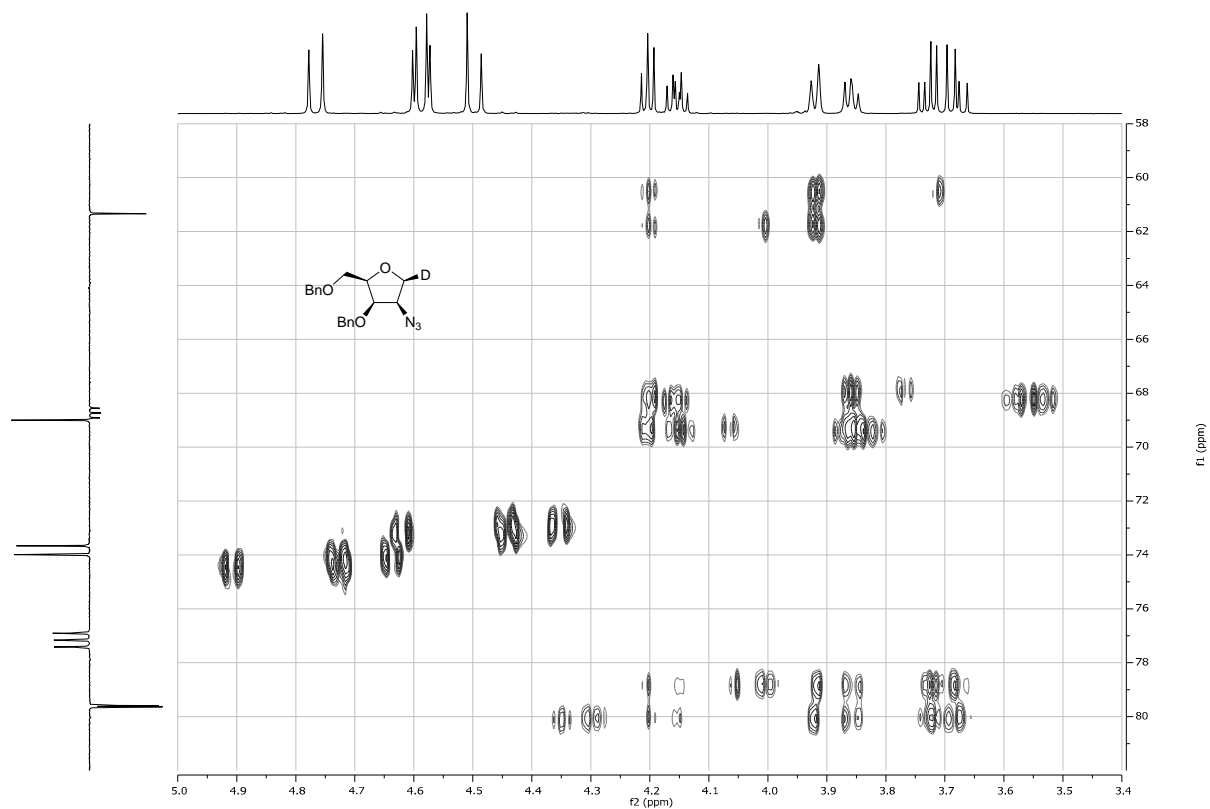

$^2\text{H}$  NMR, 77 MHz,  $\text{CHCl}_3$  of compound **71**

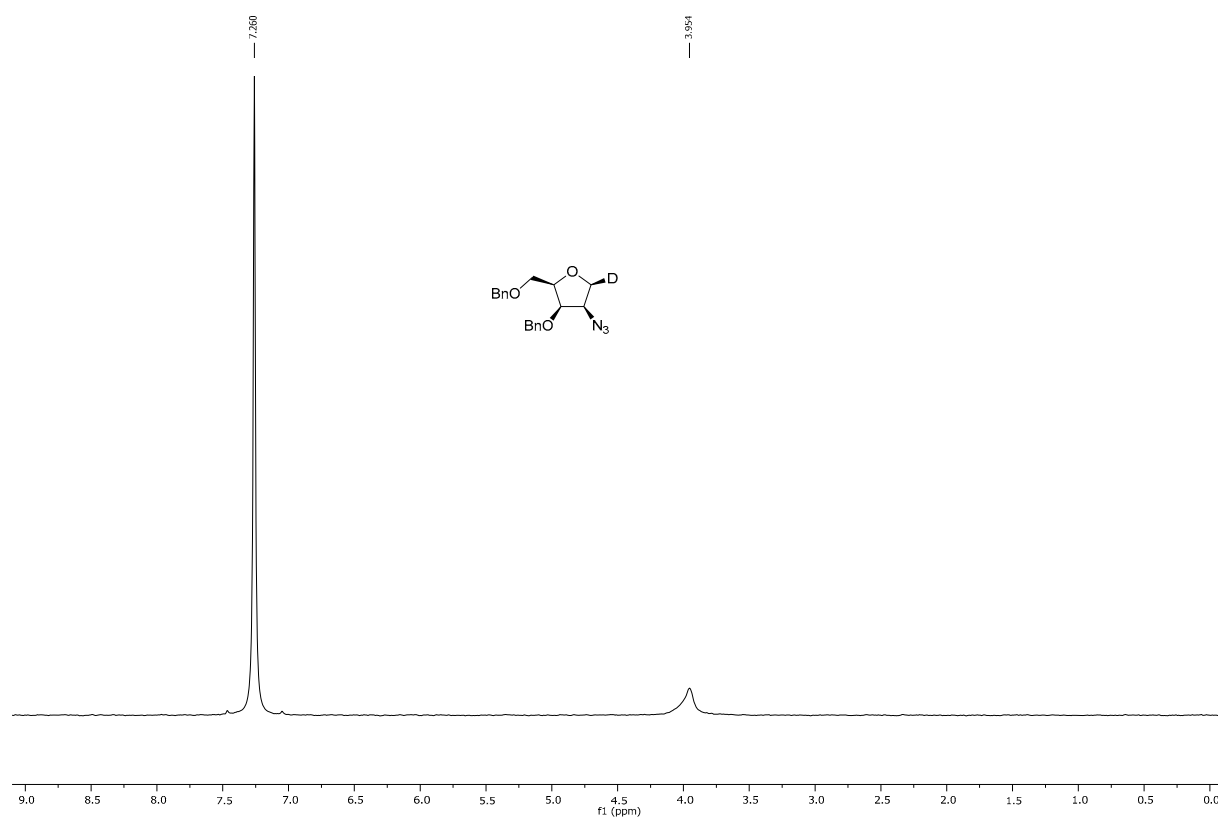

1- $^2\text{H}$ -1,4-anhydro-2-azido-3,5-di-O-benzyl-2-deoxy- $\alpha/\beta$ -D-xylytol (**72**)

$^1\text{H}$  NMR, 500 MHz,  $\text{CDCl}_3$  of compounds **72** and **79**

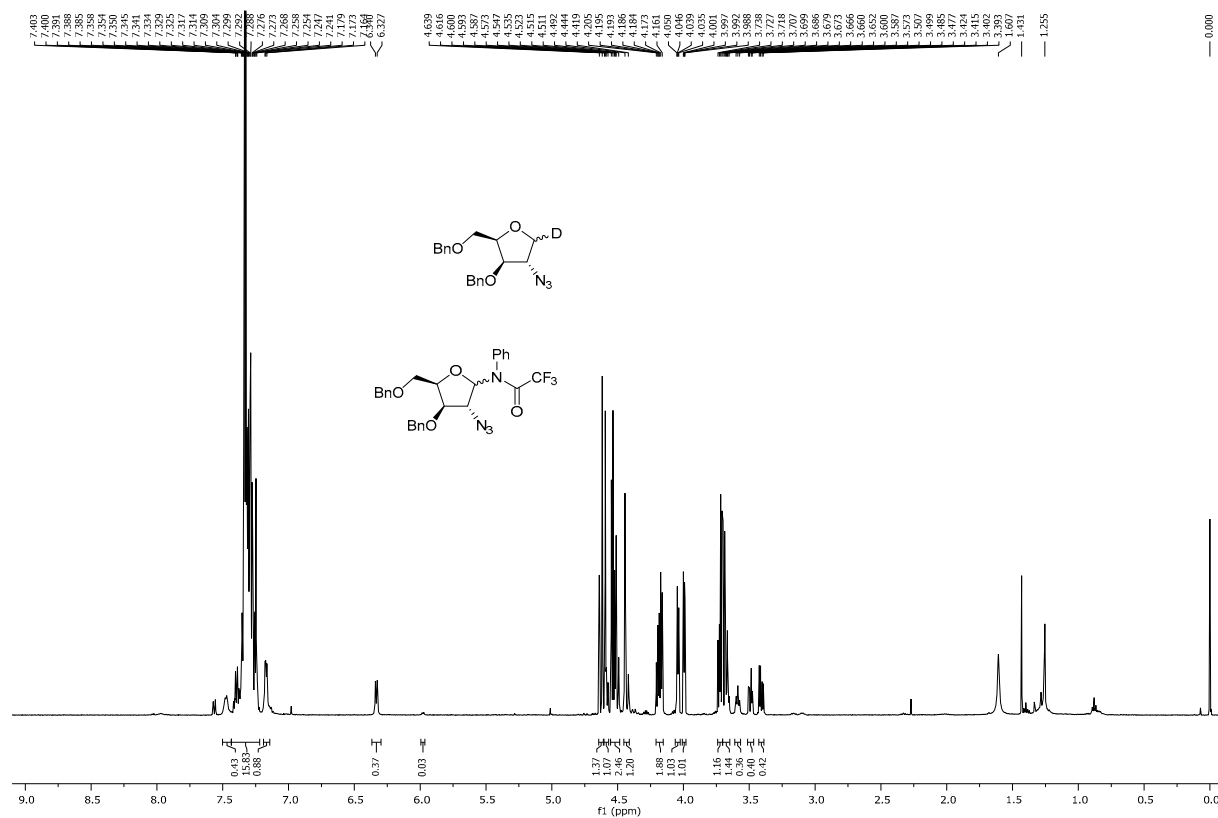



$^{13}\text{C}$ -APT NMR, 126 MHz,  $\text{CDCl}_3$  of compounds **72** and **79**

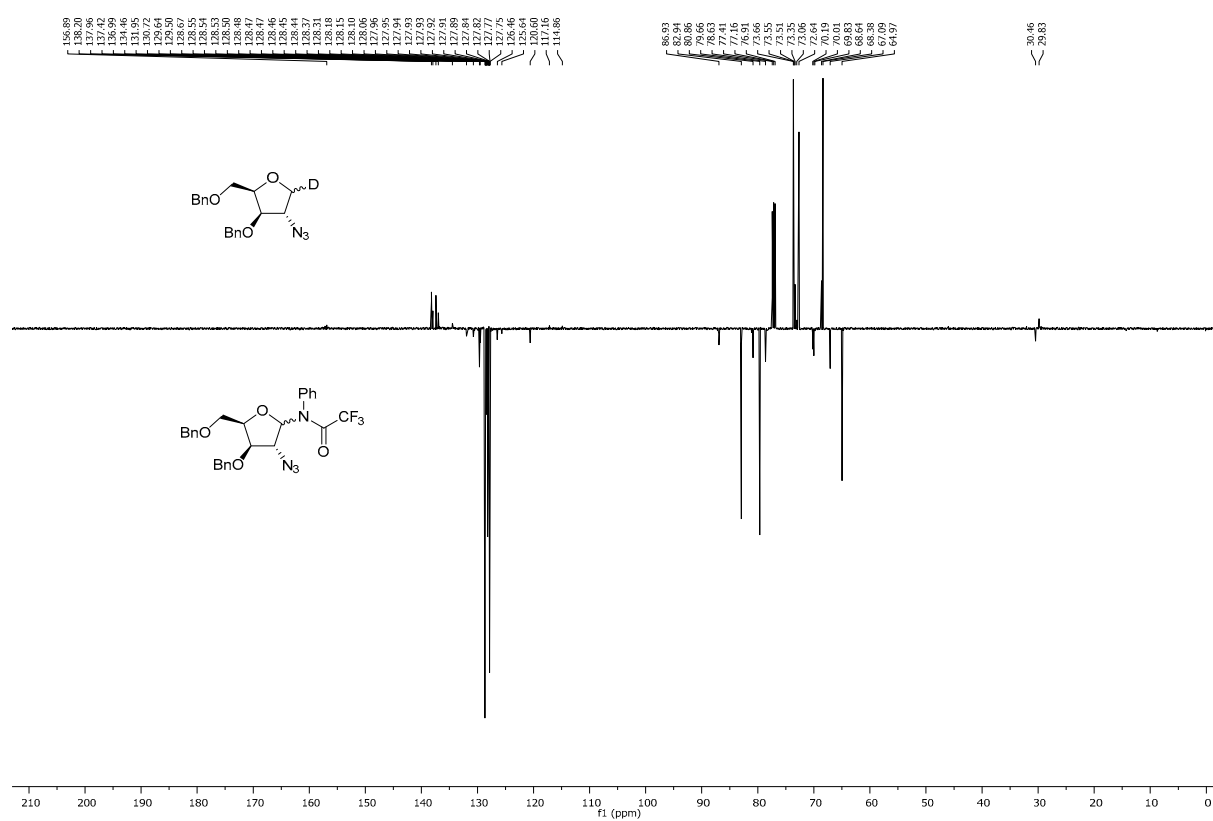

$^{19}\text{F}$  NMR, 471 MHz,  $\text{CDCl}_3$  of compound **79**

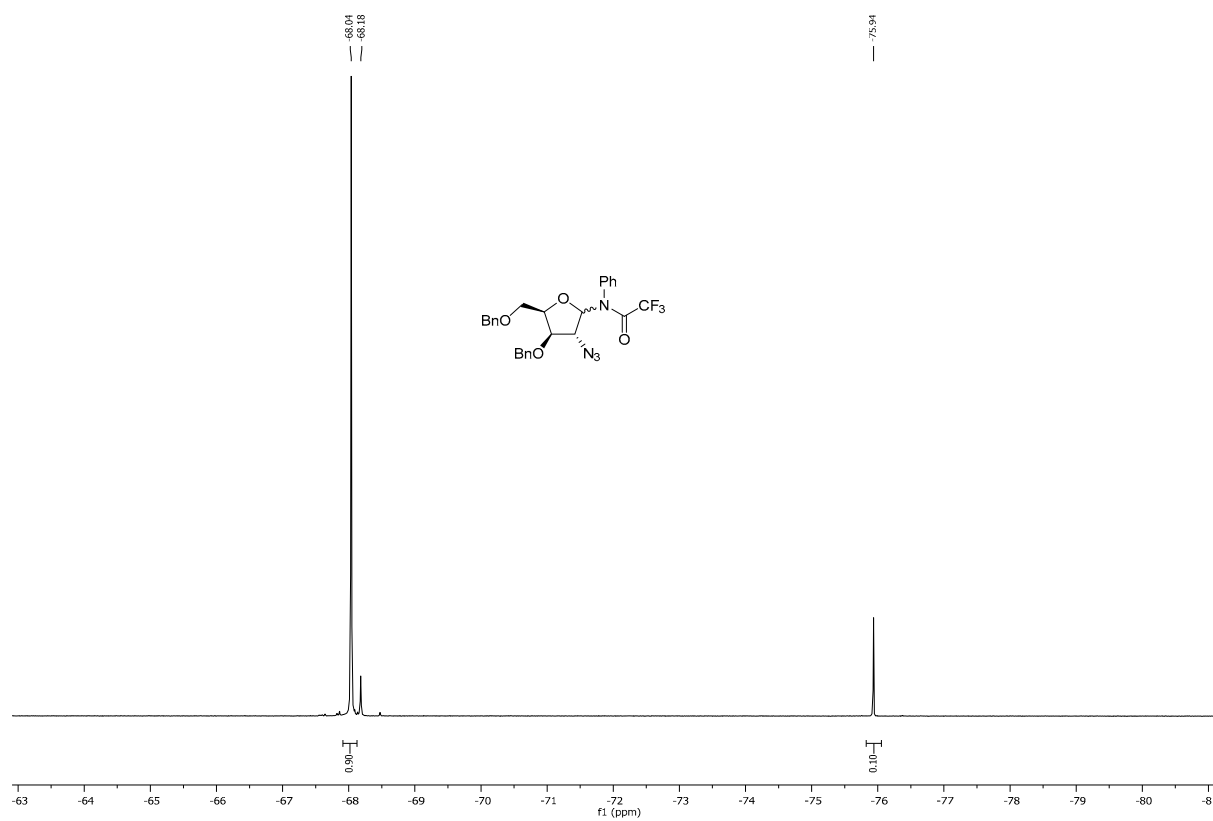

$^1\text{H}$ - $^1\text{H}$  COSY of compounds **72** and **79**

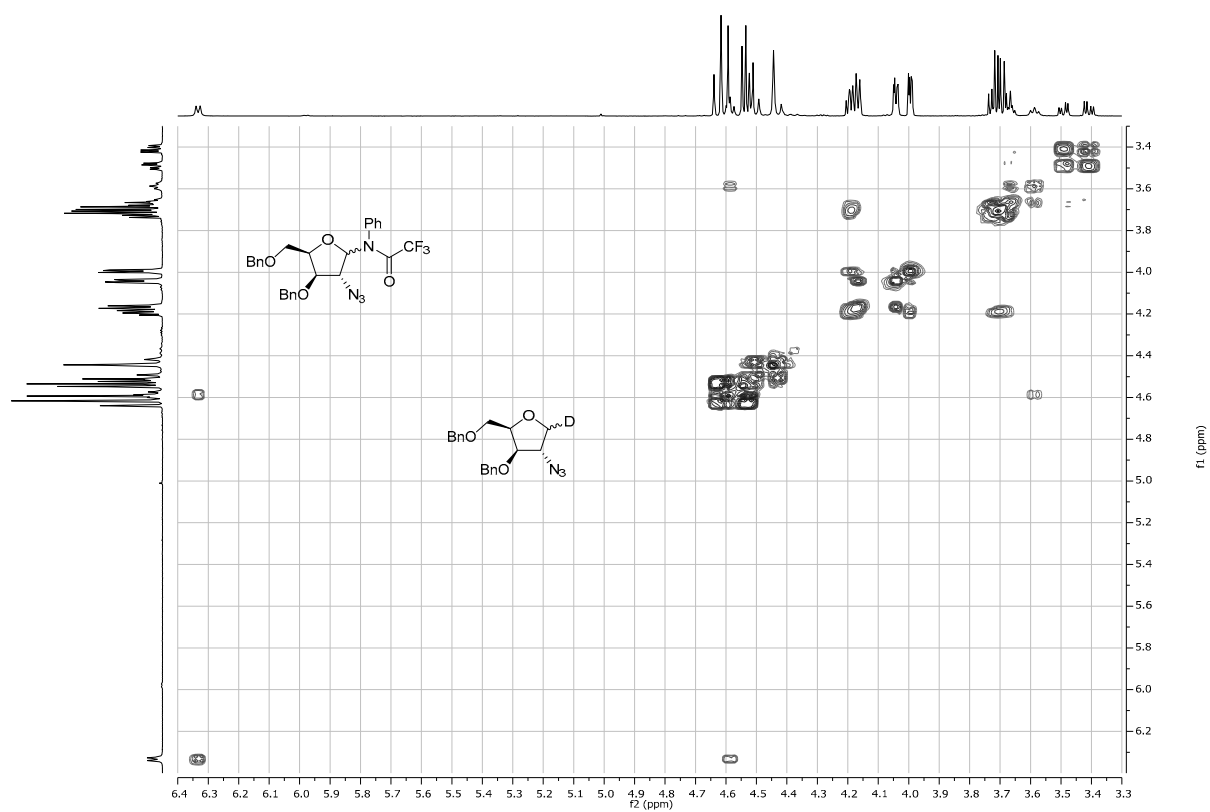

$^1\text{H}$ - $^{13}\text{C}$  HSQC of compounds **72** and **79**

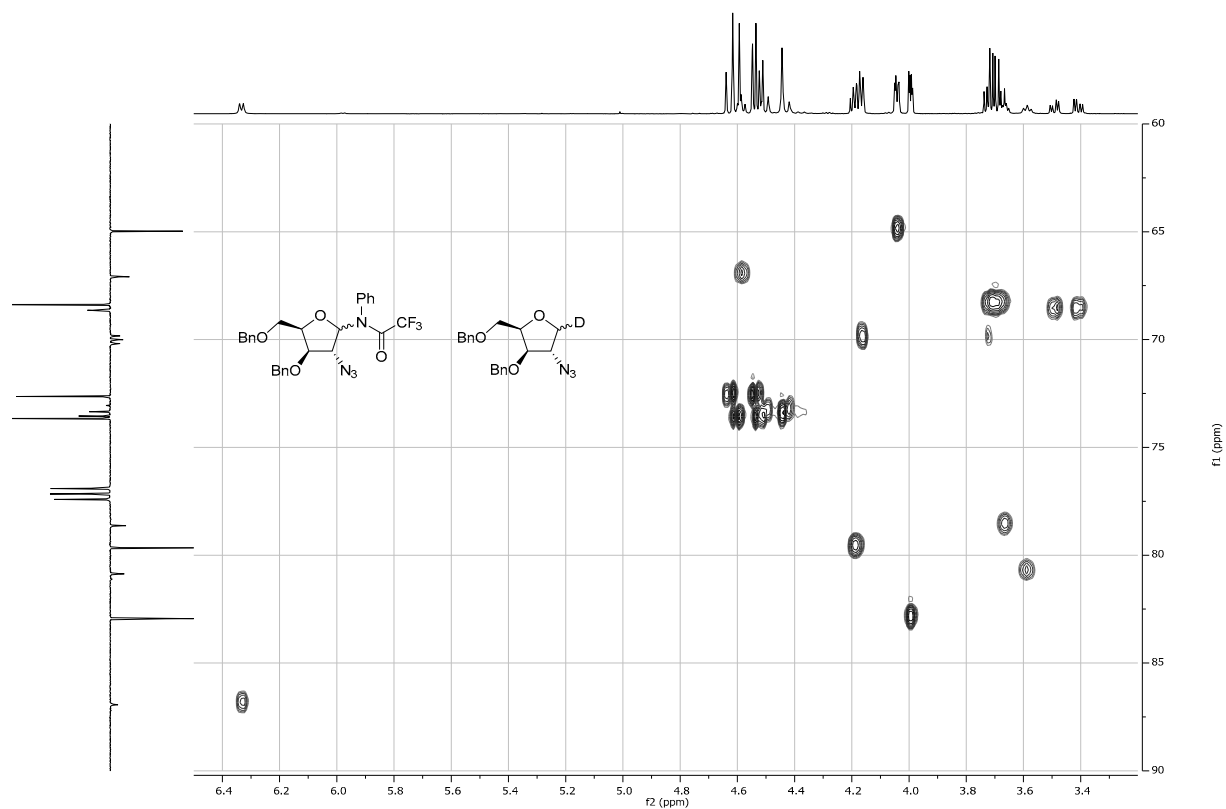

$^1\text{H}$ - $^1\text{H}$  NOESY of compounds **72** and **79**

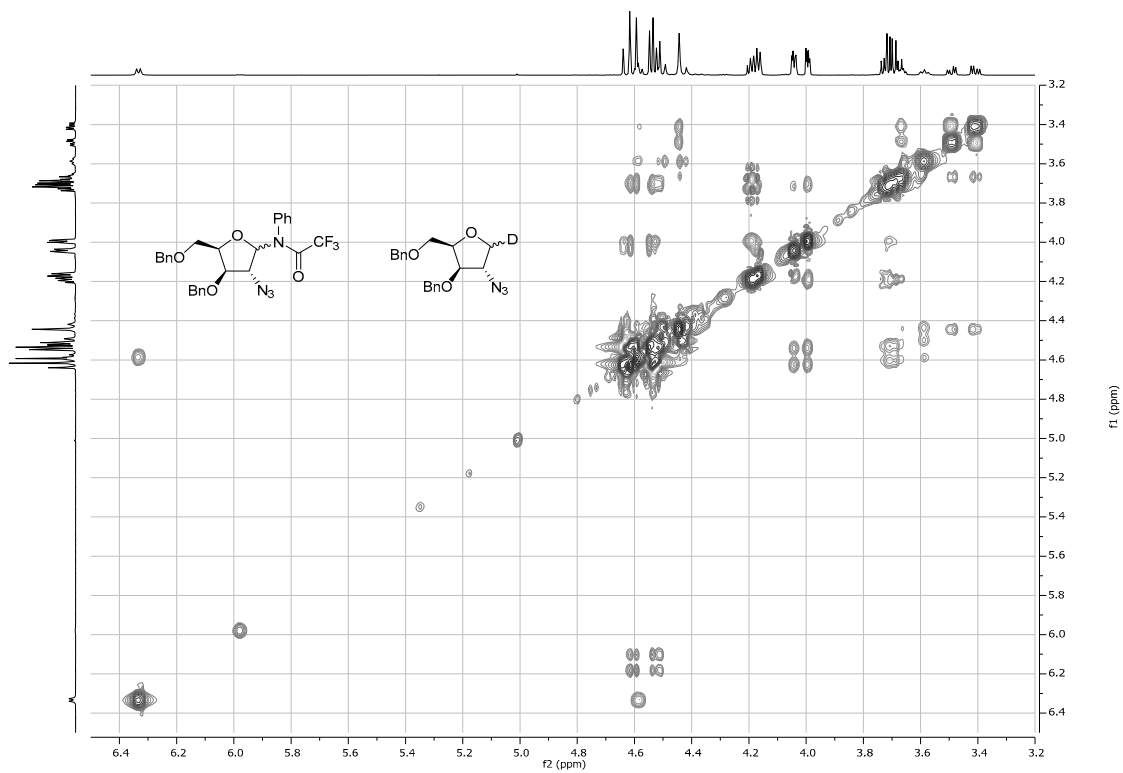

$^1\text{H}$ - $^{13}\text{C}$  HSQC-HECADE of compounds **72** and **79**

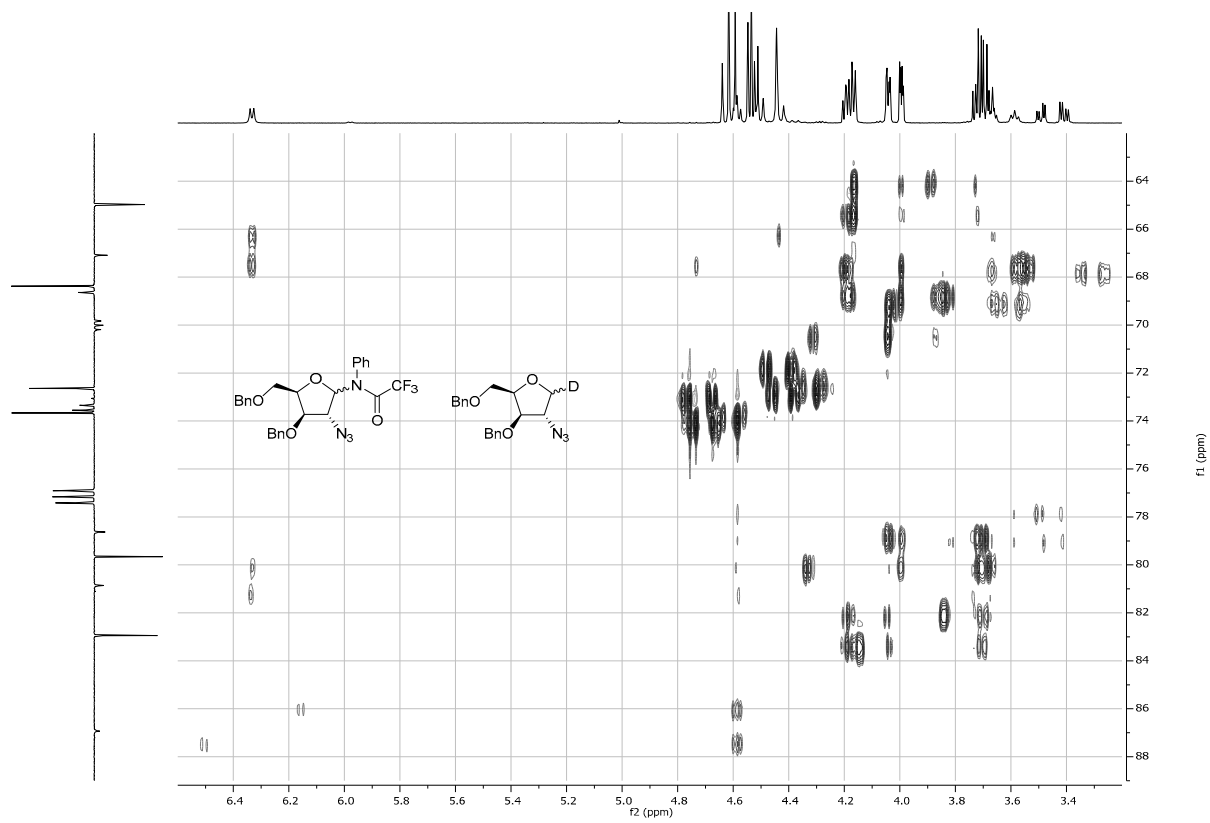

$^2\text{H}$  NMR, 77 MHz,  $\text{CHCl}_3$  of compound **72**

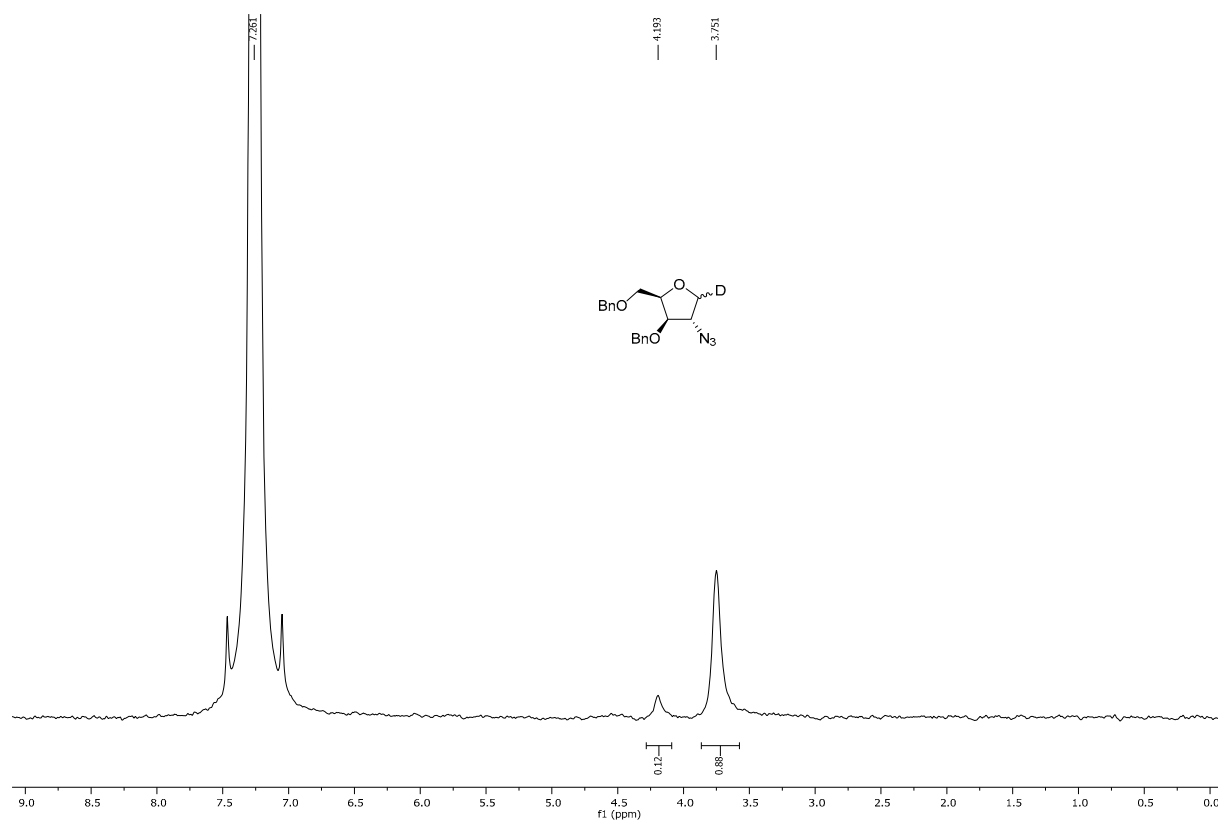

Allyl 3,5-di-*O*-benzyl-1,2-dideoxy-2-fluoro- $\alpha$ -D-ribofuranoside (**73**)

$^1\text{H}$  NMR, 500 MHz,  $\text{CDCl}_3$  of compound **73**

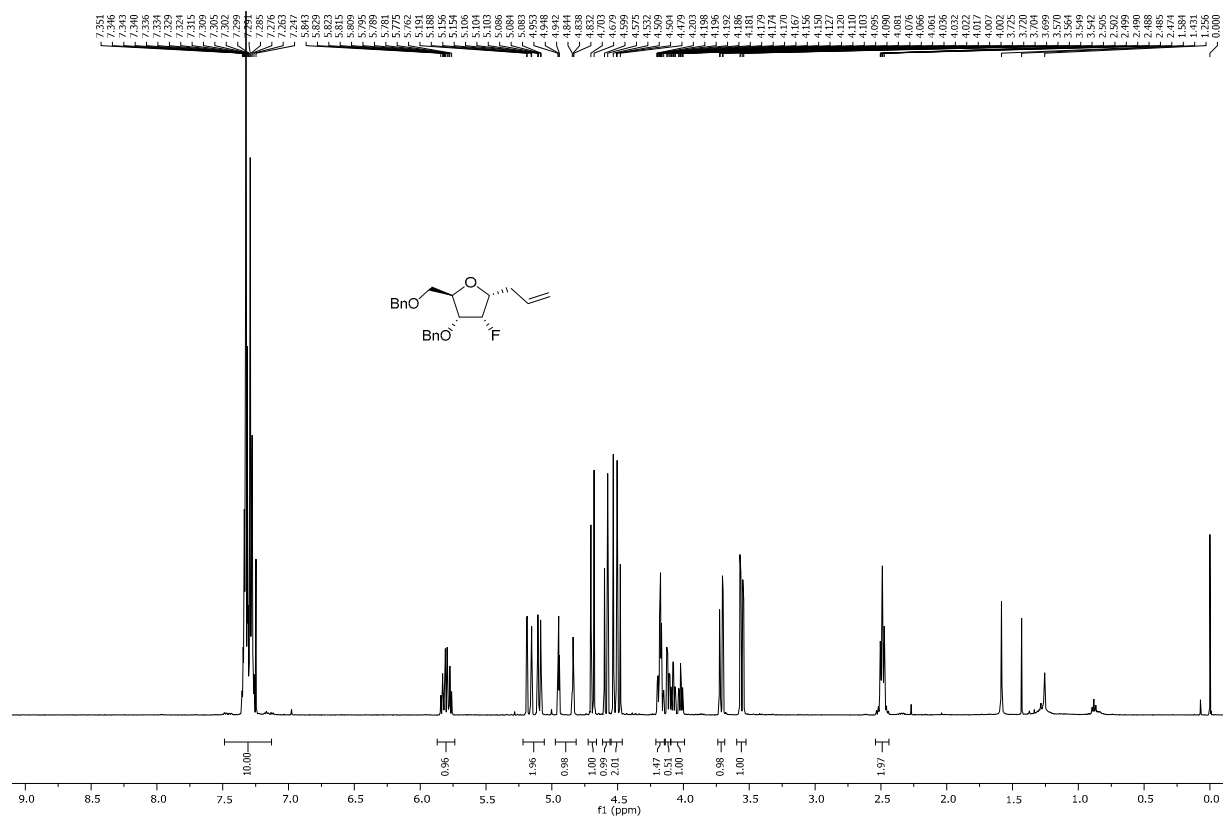

$^{19}\text{F}$ -decoupled  $^1\text{H}$  NMR, (-215 ppm)

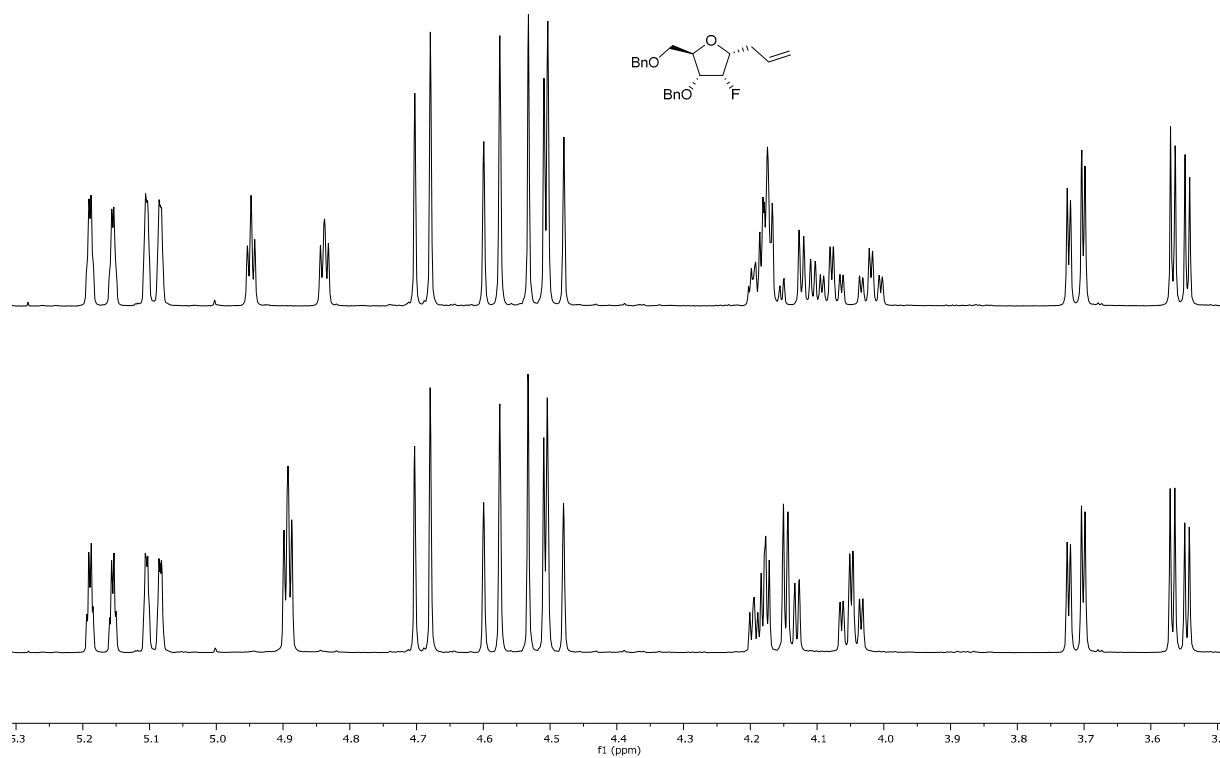

$^{13}\text{C}$ -APT NMR, 126 MHz,  $\text{CDCl}_3$  of compound **73**

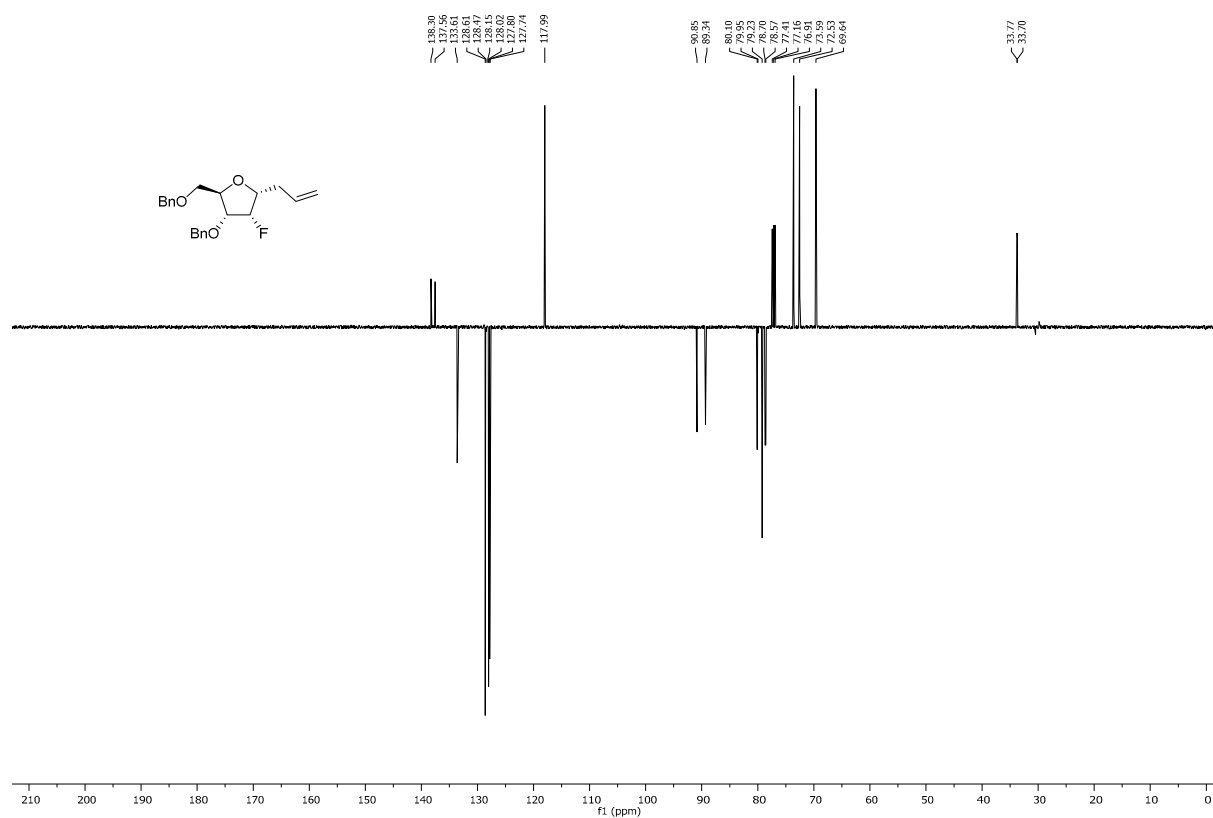

$^{19}\text{F}$  NMR, 471 MHz,  $\text{CDCl}_3$  of compound **73**

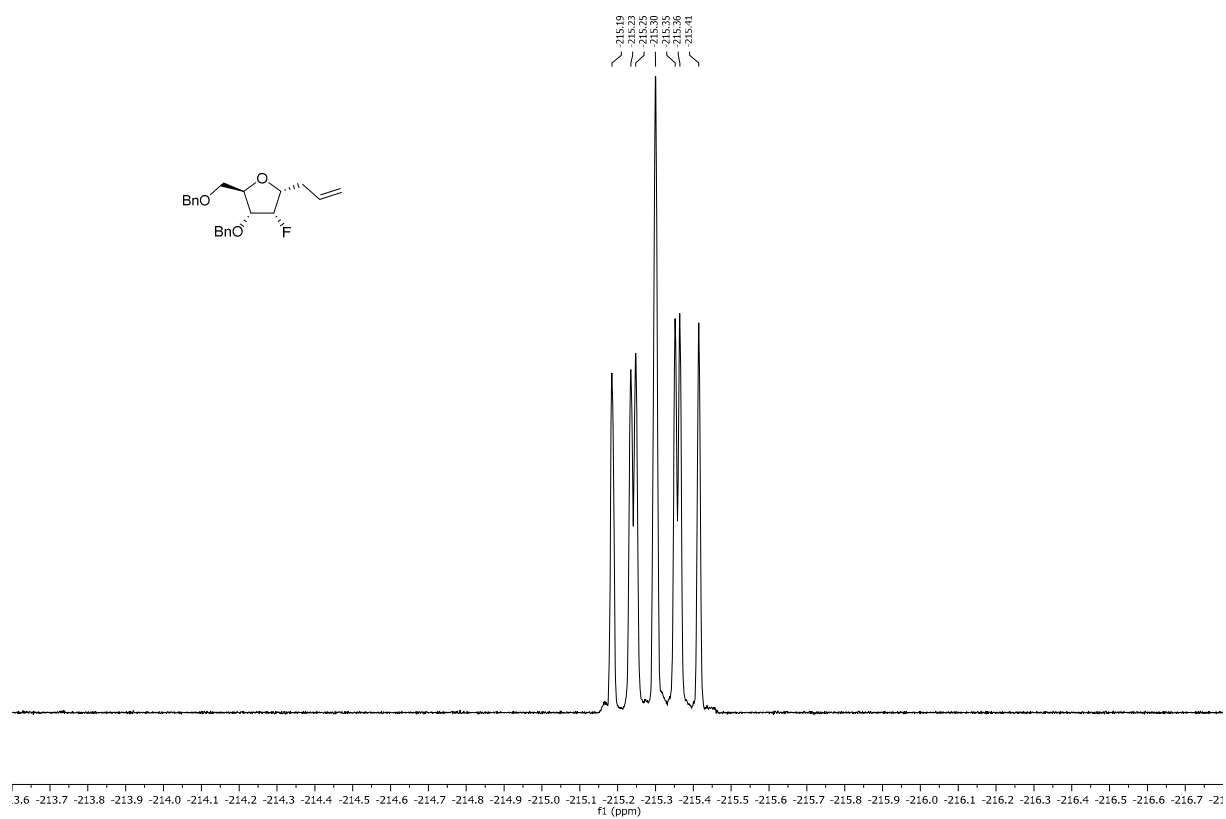

$^1\text{H}$ - $^1\text{H}$  COSY of compound **73**

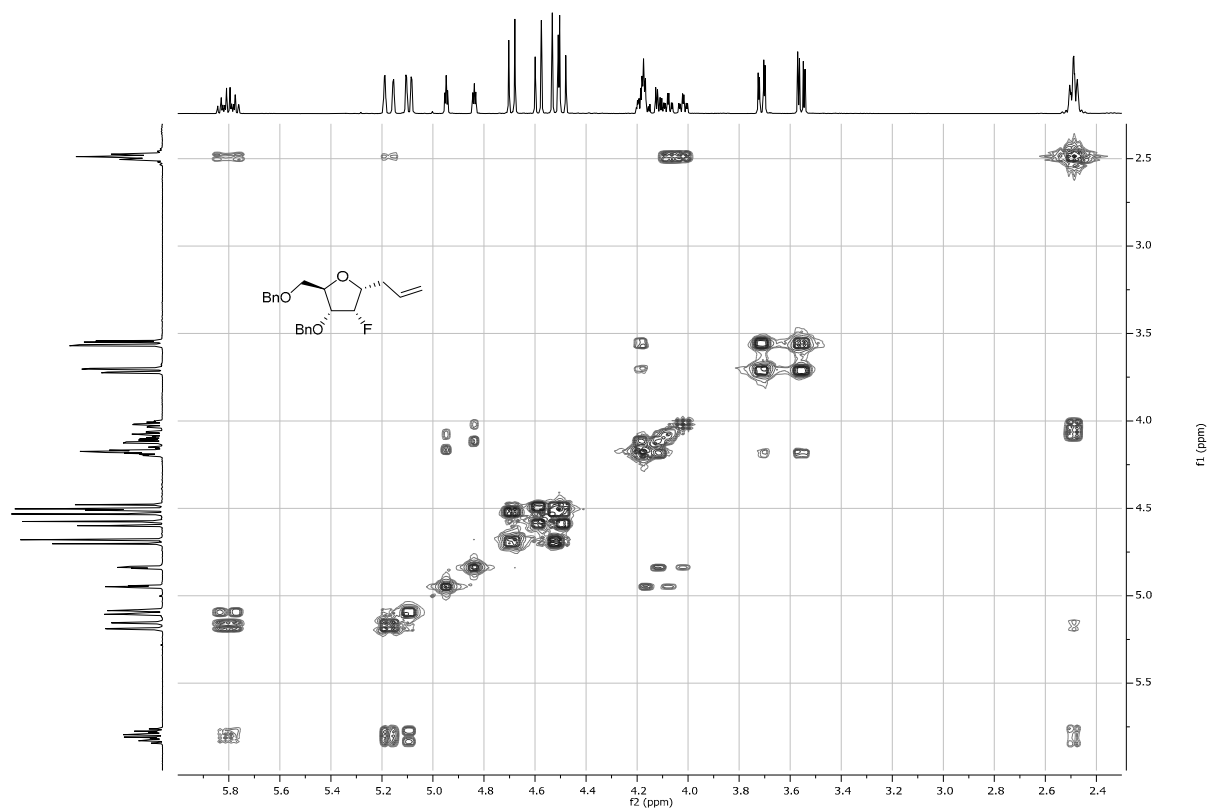

$^1\text{H}$ - $^{13}\text{C}$  HSQC of compound **73**

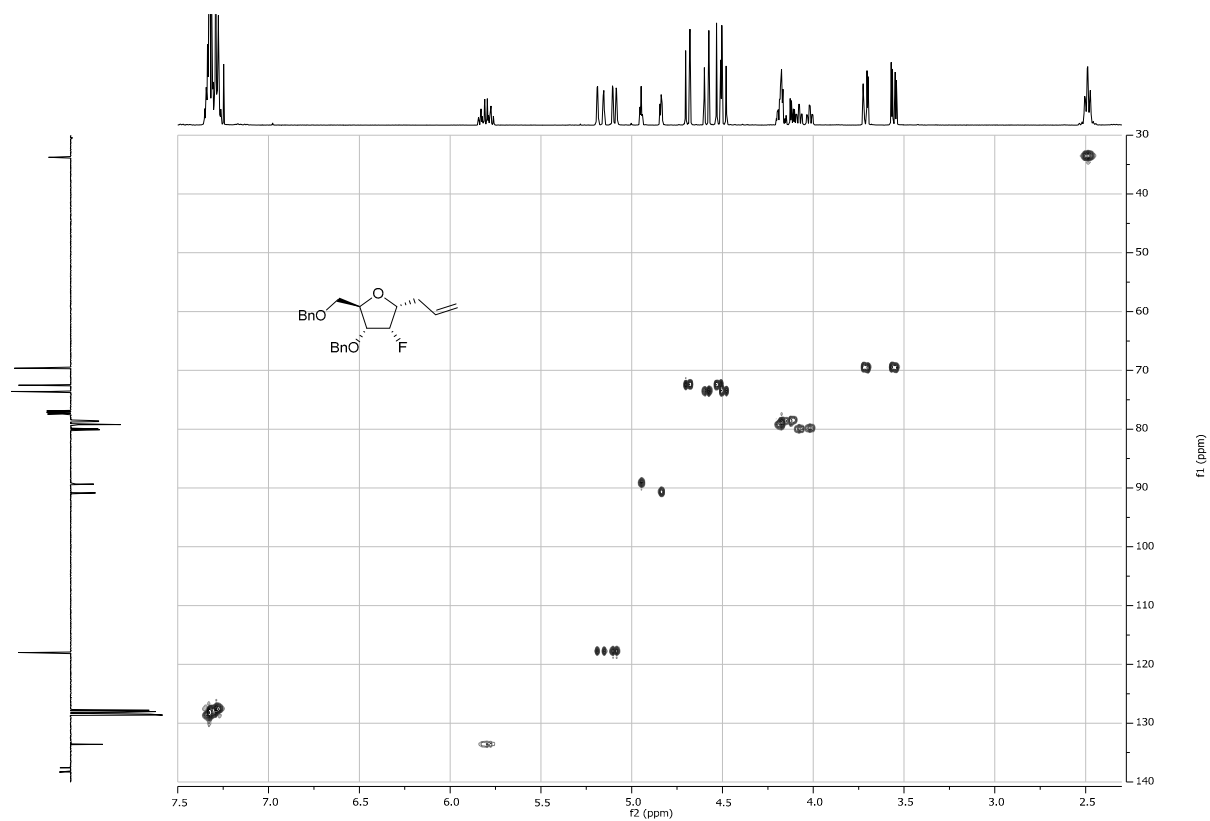

$^1\text{H}$ - $^1\text{H}$  NOESY of compound **73**

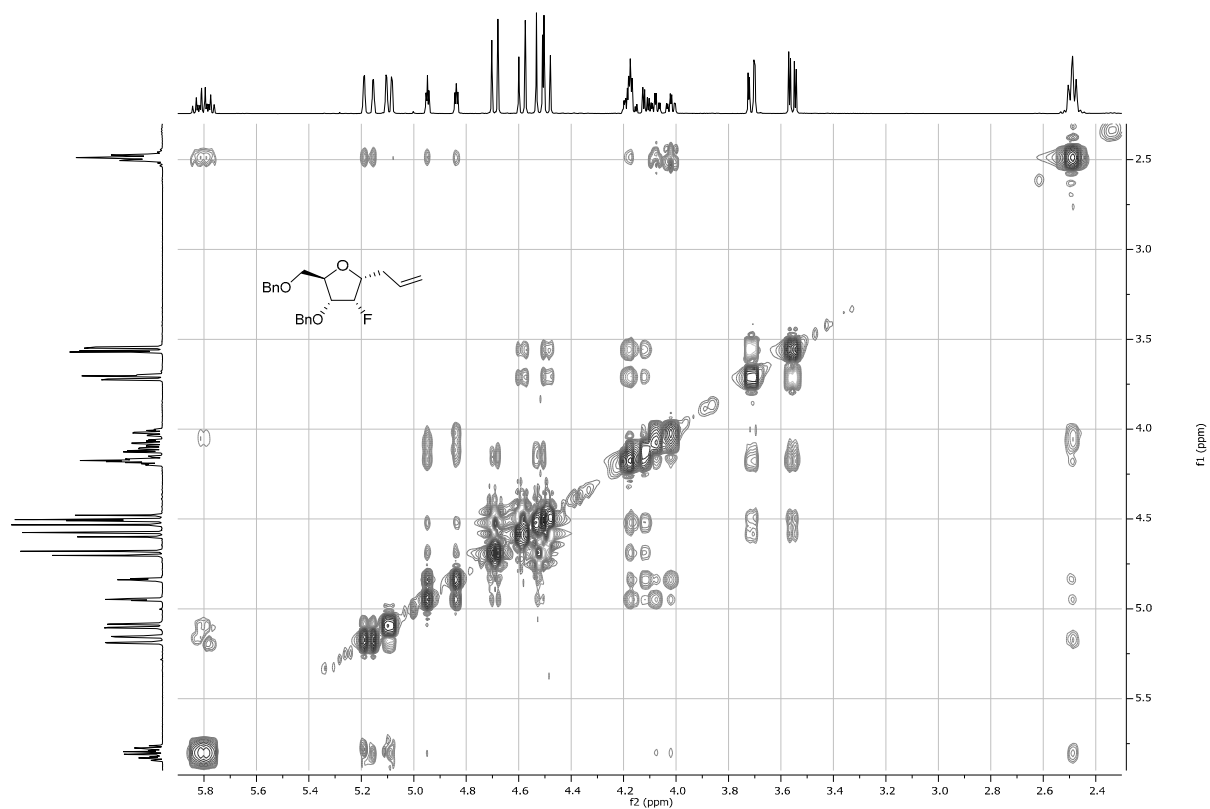

$^1\text{H}$ - $^{13}\text{C}$  HSQC-HECADE of compound **73**

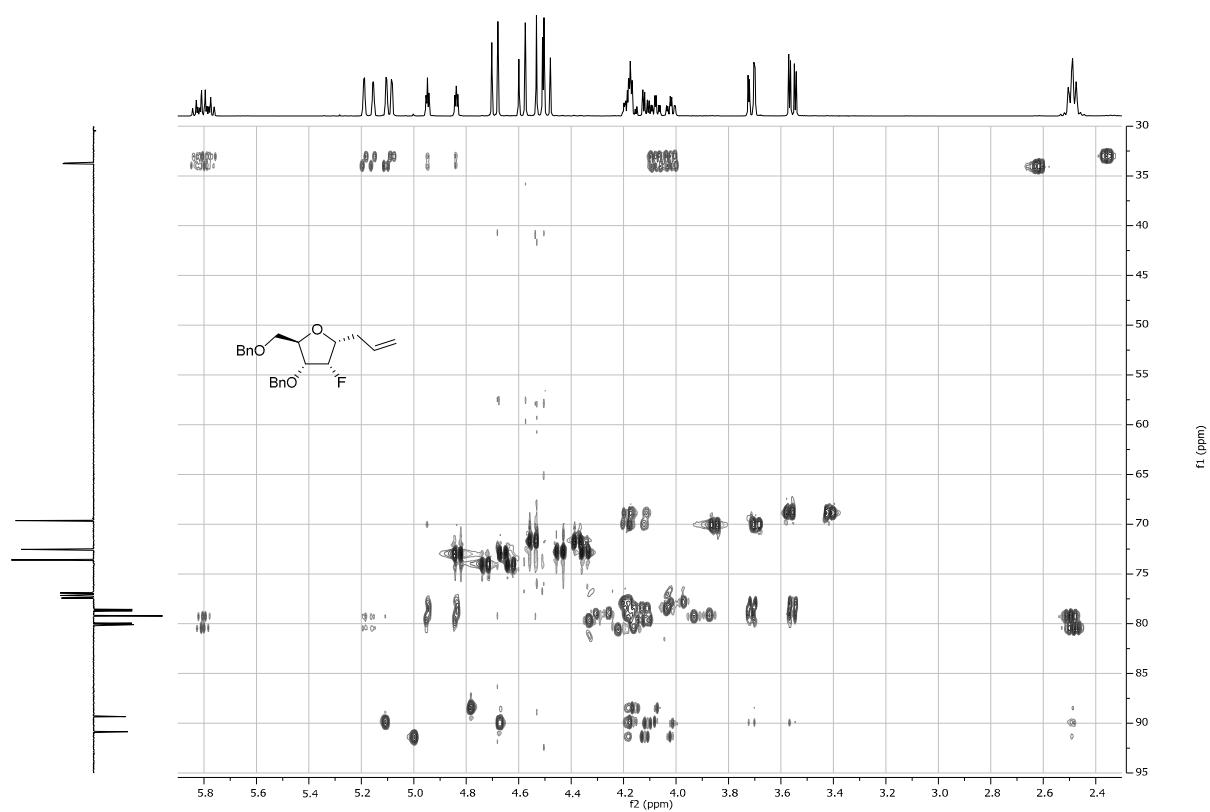

Allyl 3,5-di-O-benzyl-1,2-dideoxy-2-fluoro- $\beta$ -D-arabinofuranoside (**74**)

$^1\text{H}$  NMR, 500 MHz,  $\text{CDCl}_3$  of compound **74**

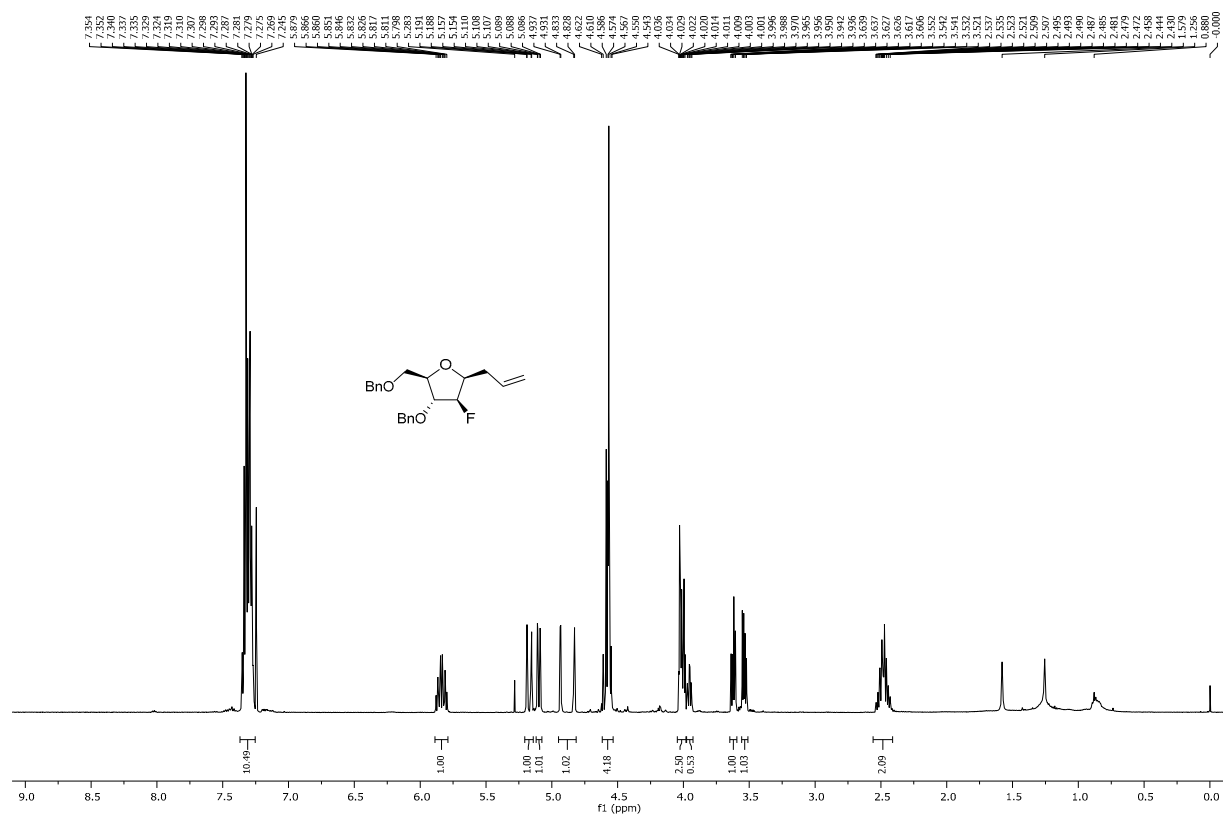



$^{19}\text{F}$ -decoupled  $^1\text{H}$  NMR, (-200 ppm)

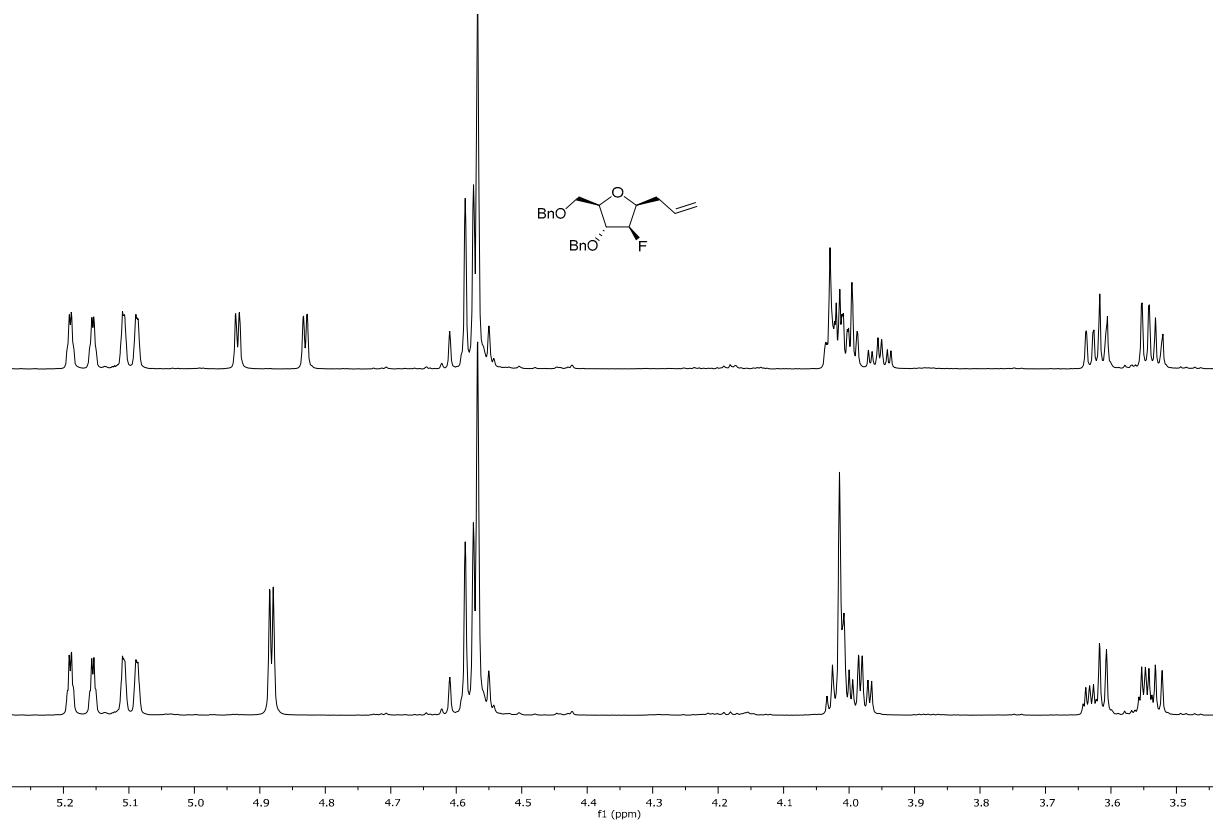

$^{13}\text{C}$ -APT NMR, 126 MHz,  $\text{CDCl}_3$  of compound **74**

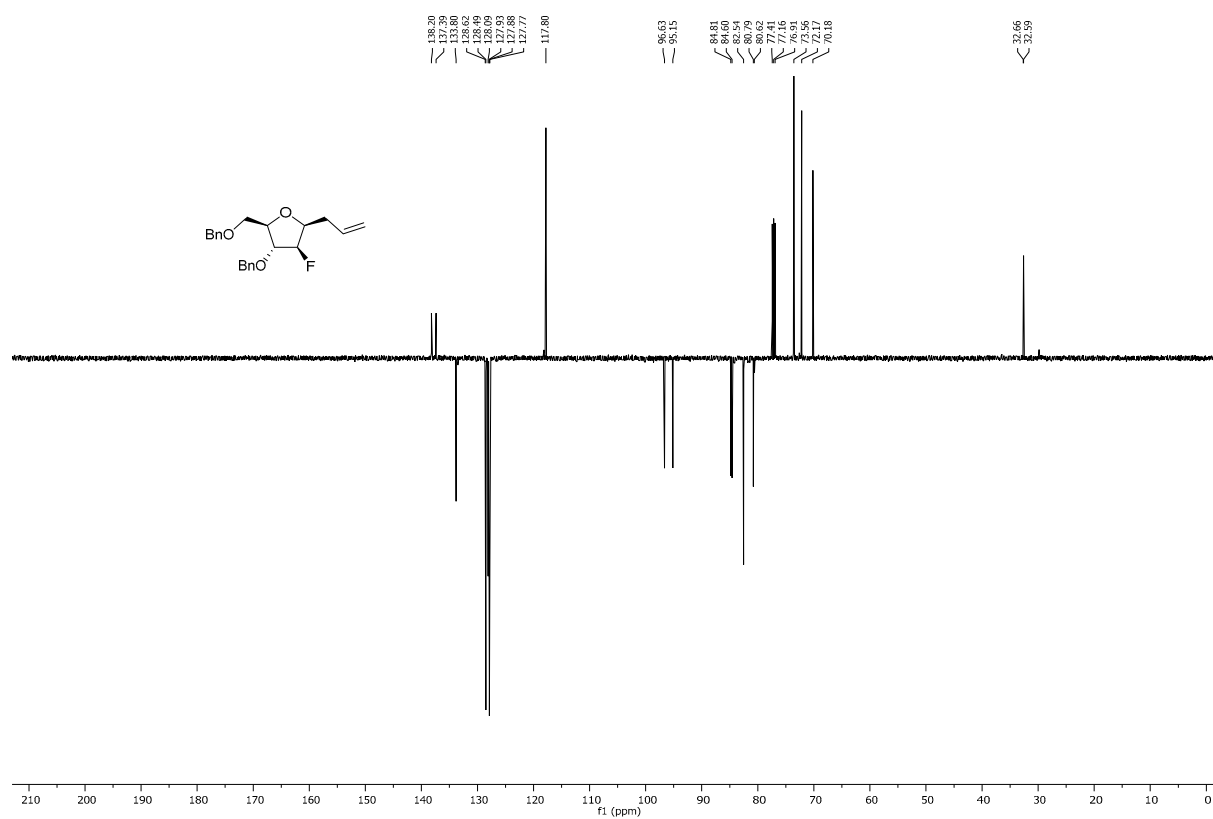

$^{19}\text{F}$  NMR, 471 MHz,  $\text{CDCl}_3$  of compound **74**

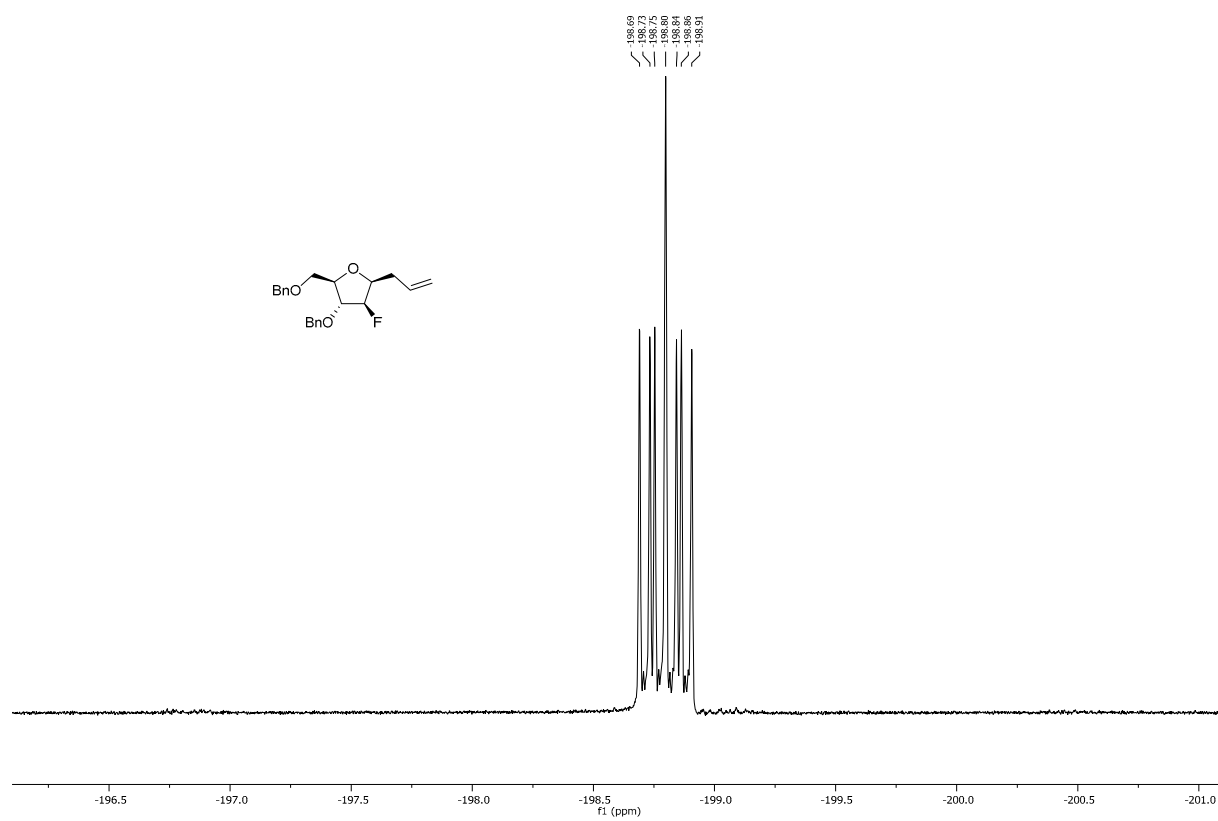

$^1\text{H}$ - $^1\text{H}$  COSY of compound **74**

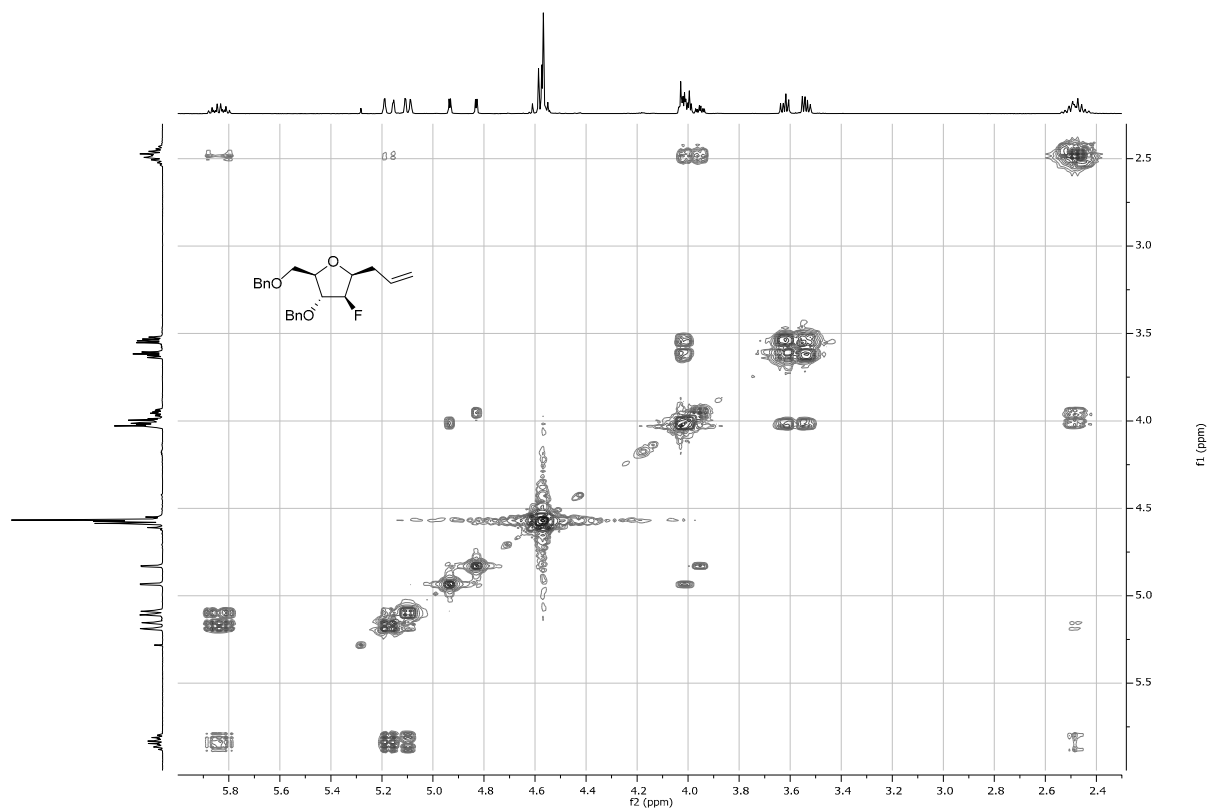

$^1\text{H}$ - $^{13}\text{C}$  HSQC of compound **74**

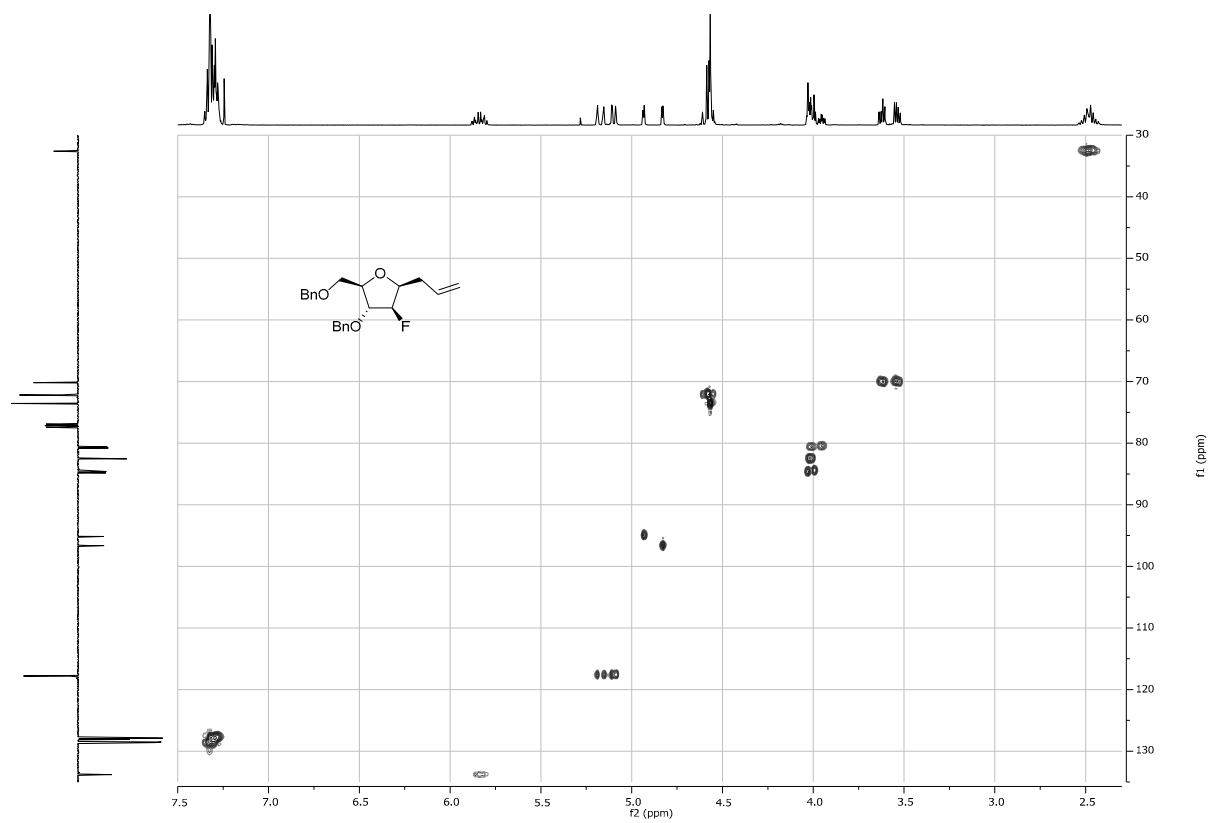

$^1\text{H}$ - $^{13}\text{C}$  HMBC of compound **74**

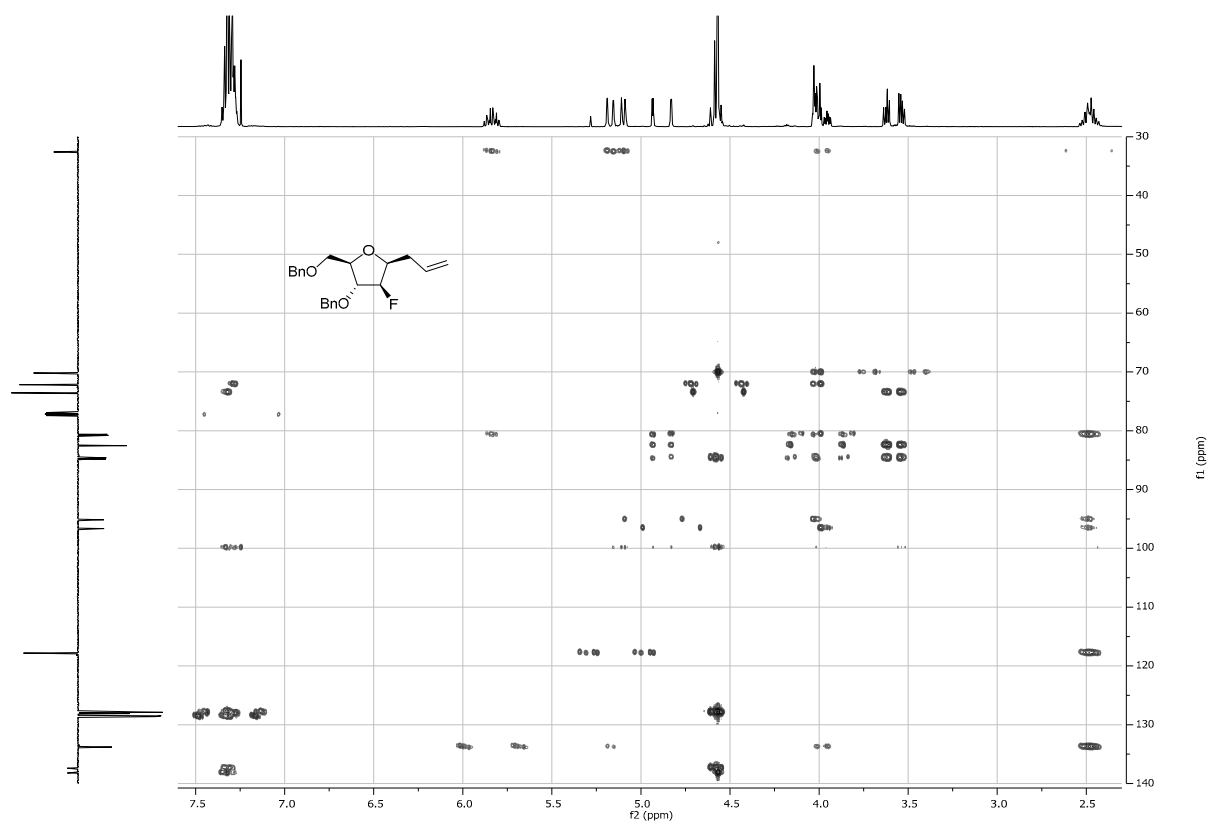

$^1\text{H}$ - $^1\text{H}$  NOESY of compound **74**

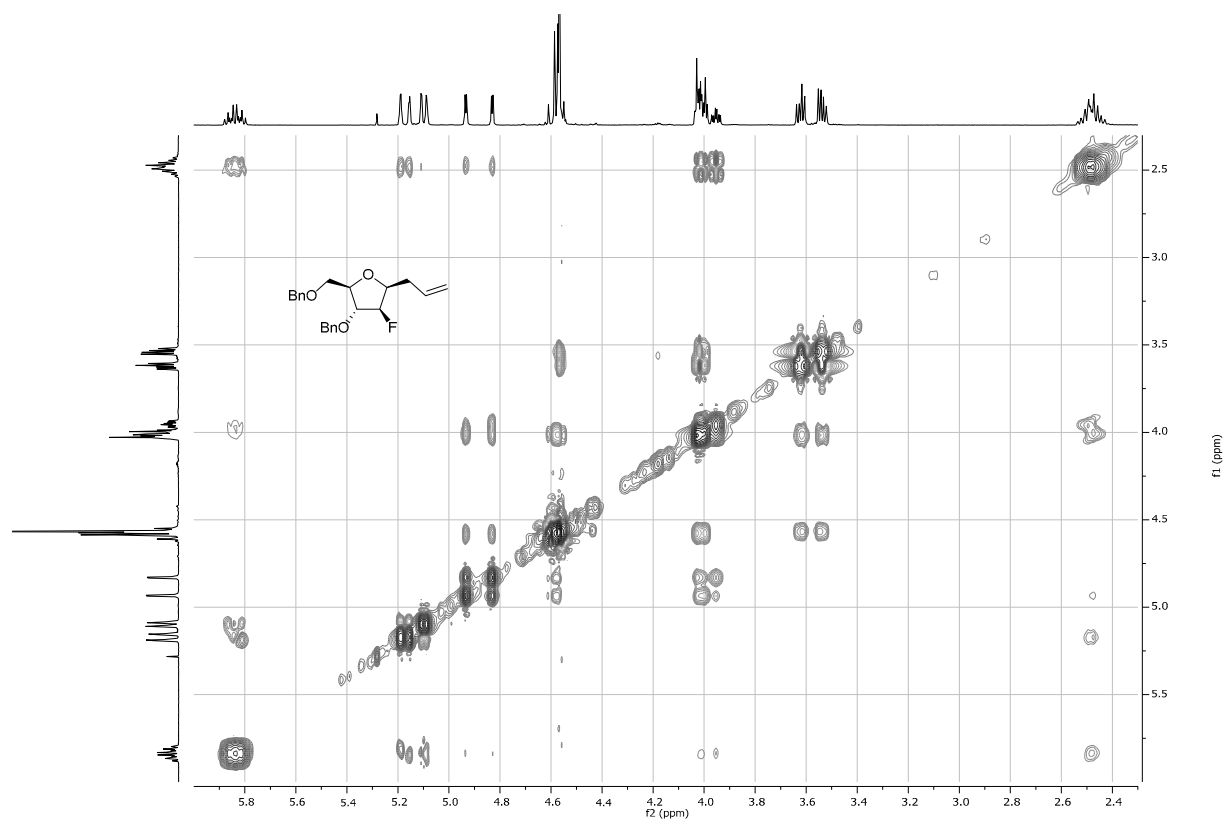

$^1\text{H}$ - $^{13}\text{C}$  HSQC-HECADE of compound **74**

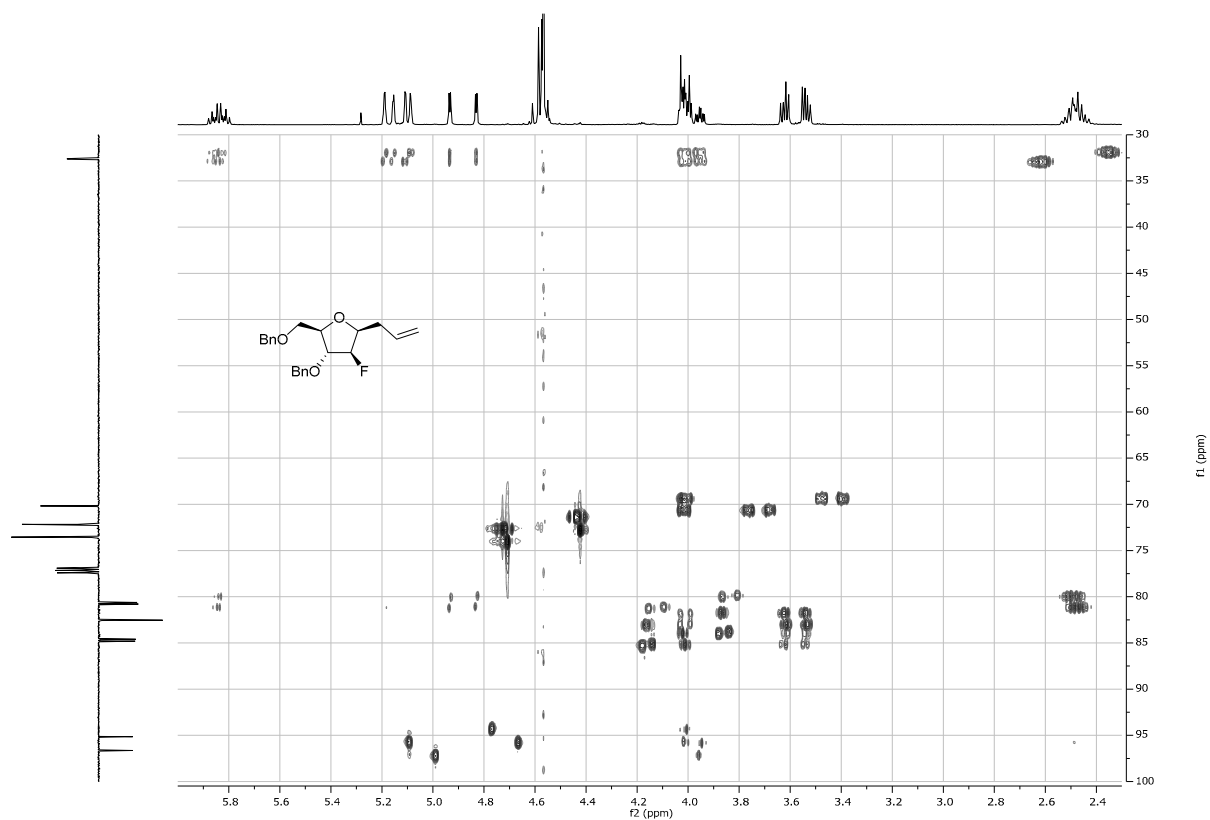

Allyl 3,5-di-O-benzyl-1,2-dideoxy-2-fluoro-β-D-lyxofuranoside (75)

<sup>1</sup>H NMR, 500 MHz, CDCl<sub>3</sub> of compound 75

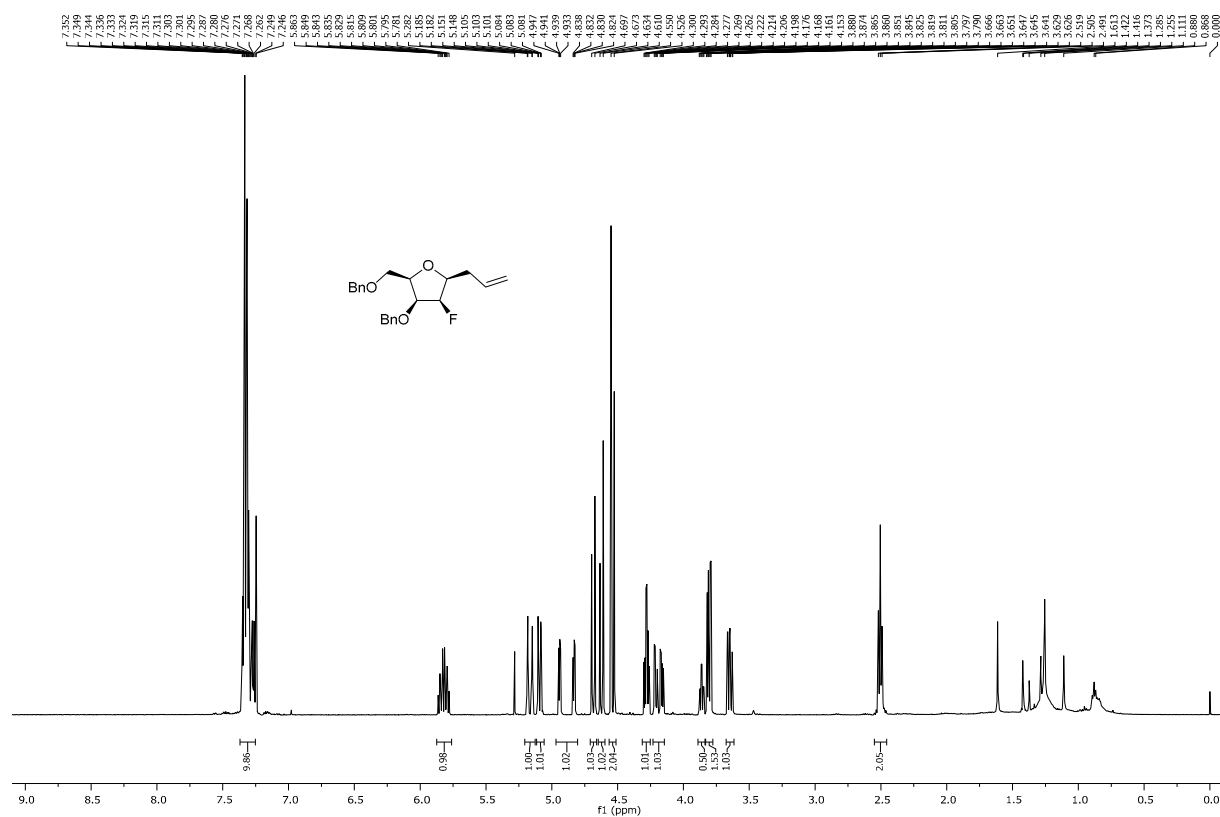

<sup>19</sup>F-decoupled <sup>1</sup>H NMR (-200 ppm)

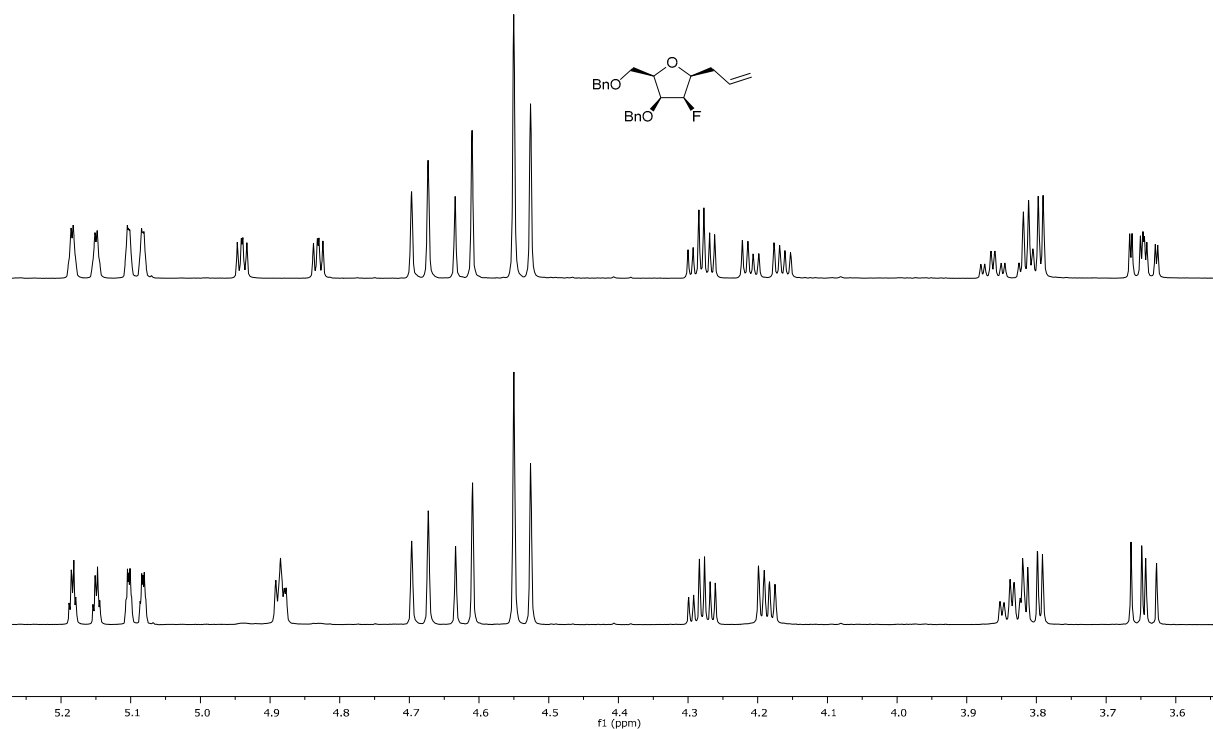

$^{13}\text{C}$ -APT NMR, 126 MHz,  $\text{CDCl}_3$  of compound **75**

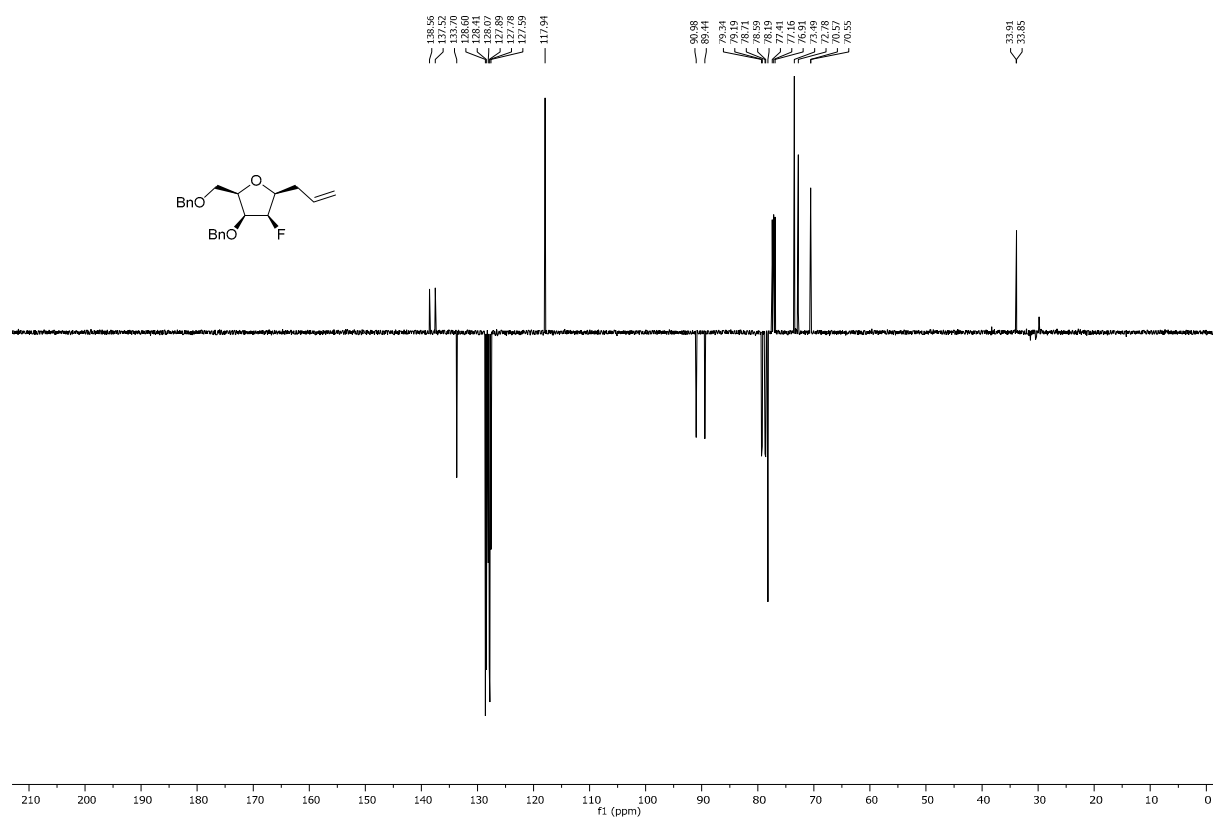

$^{19}\text{F}$  NMR, 471 MHz,  $\text{CDCl}_3$  of compound **75**

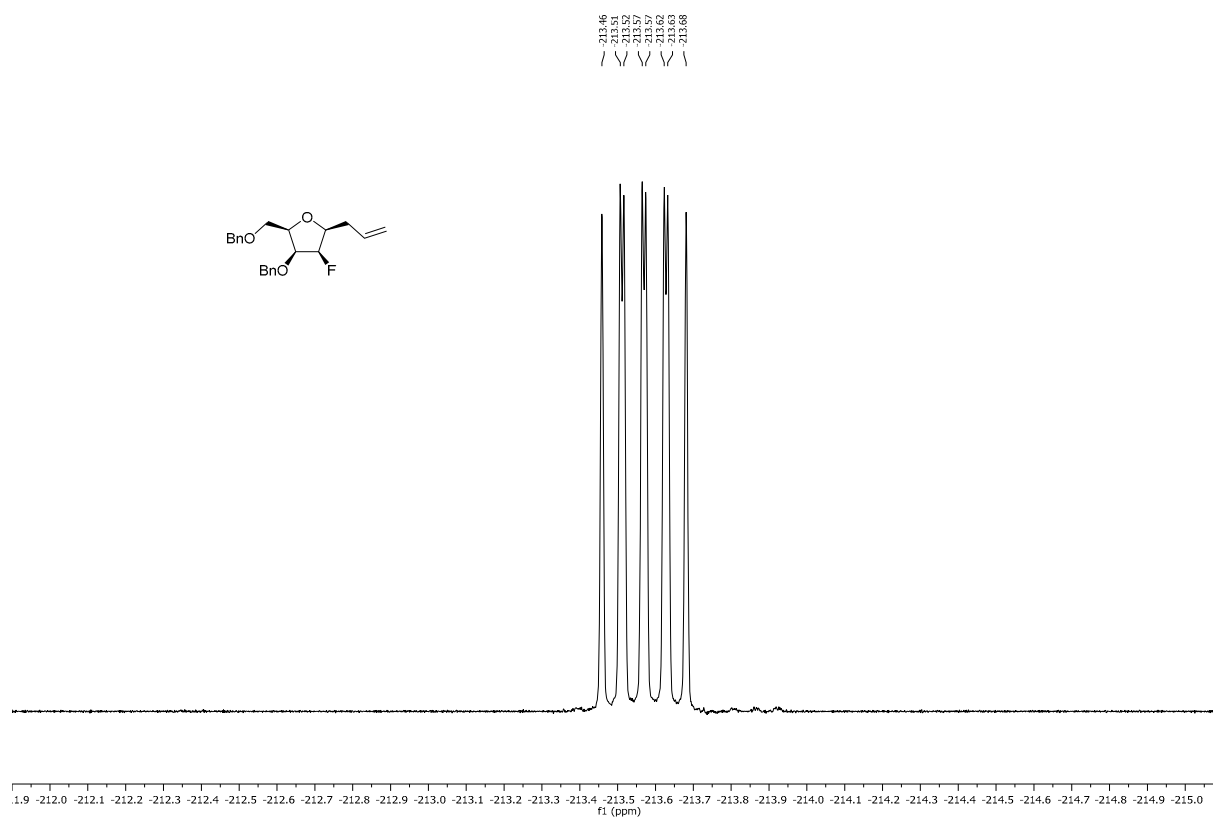

$^1\text{H}$ - $^1\text{H}$  COSY of compound 75

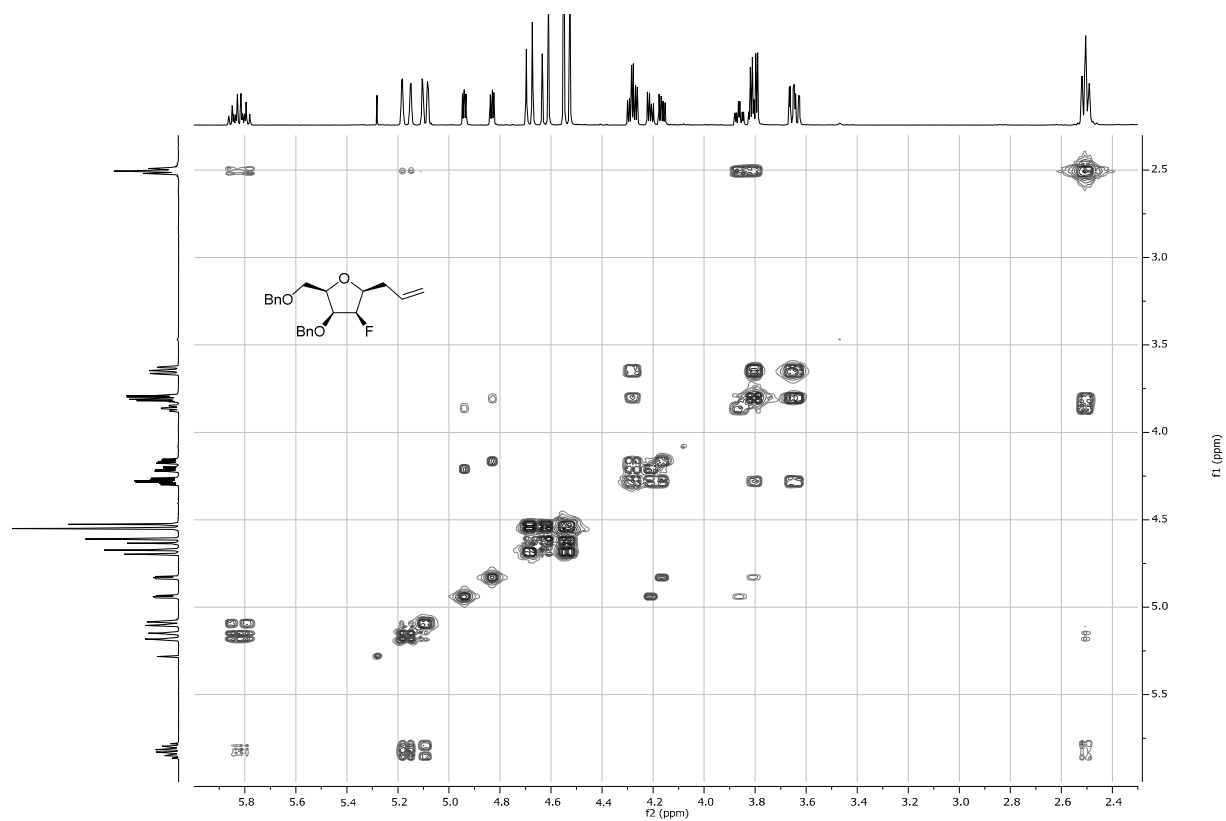

$^1\text{H}$ - $^{13}\text{C}$  HSQC of compound 75

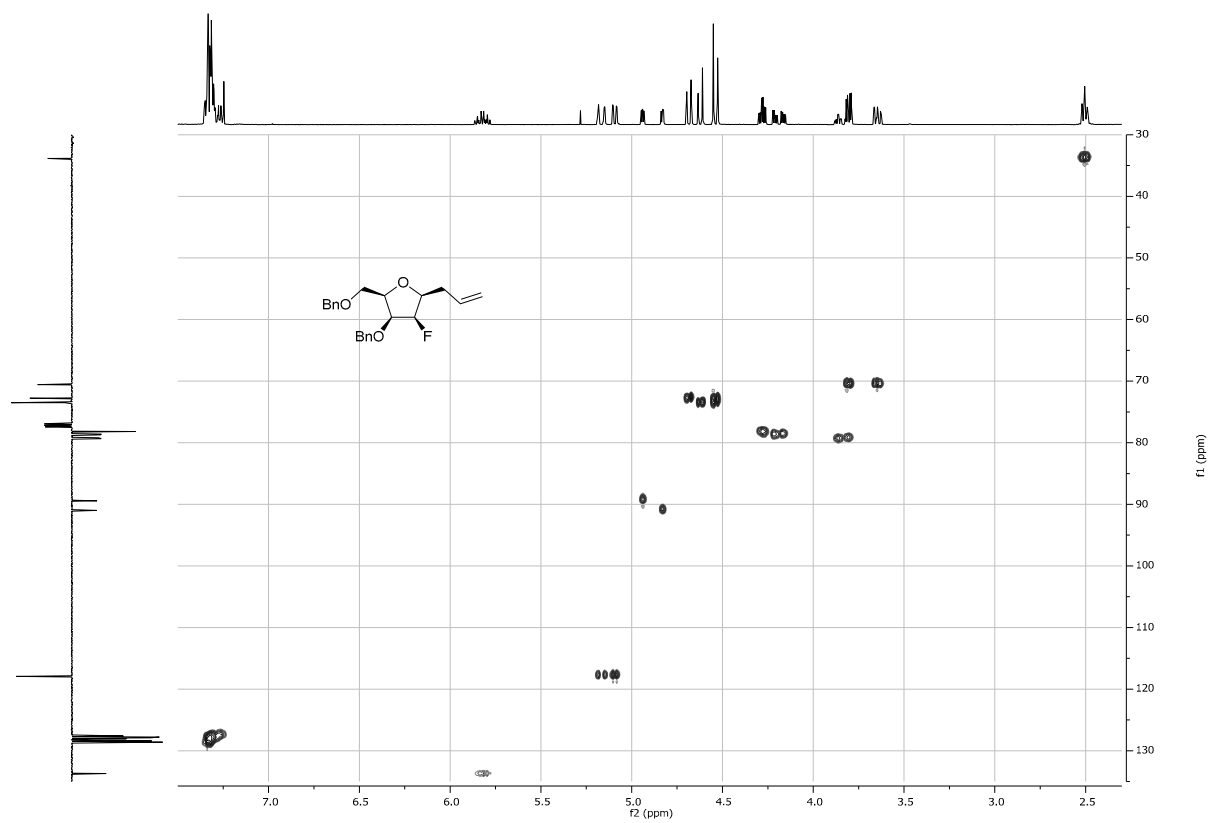

$^1\text{H}$ - $^{13}\text{C}$  HMBC of compound **75**

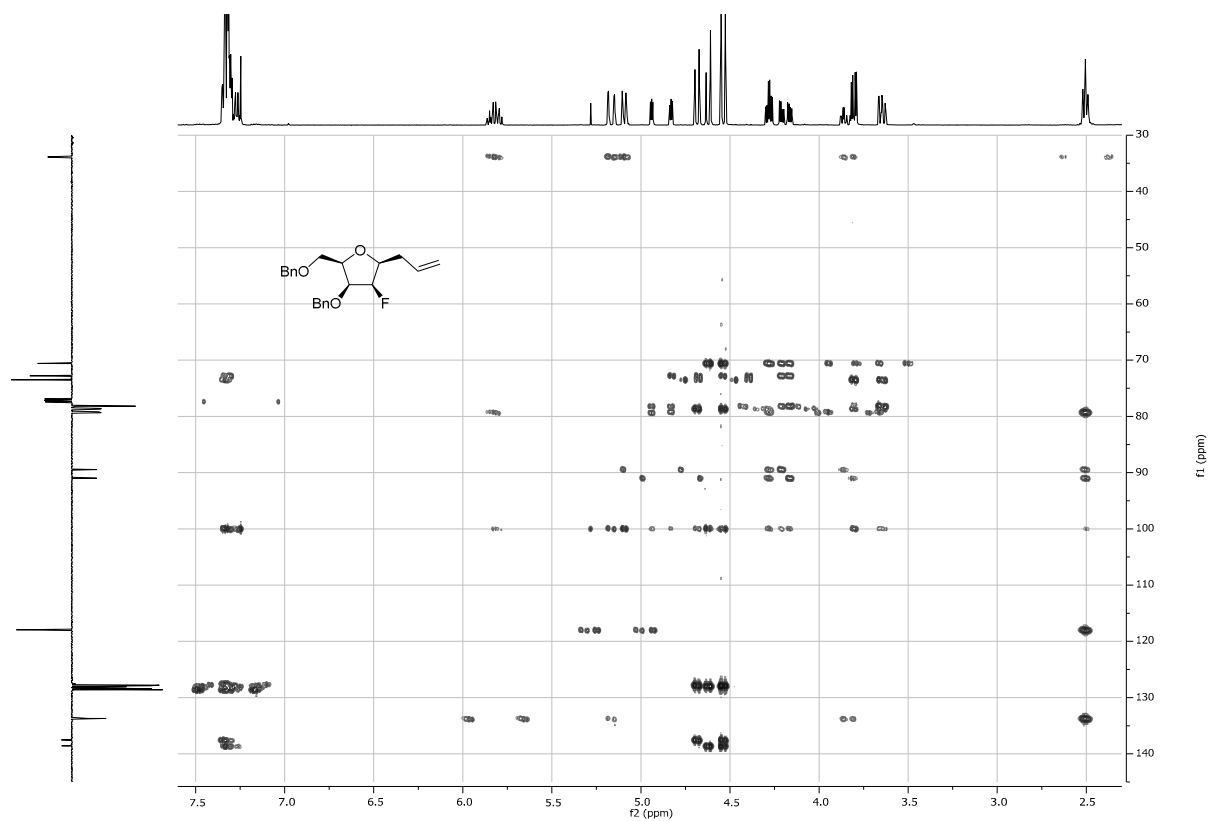

$^1\text{H}$ - $^1\text{H}$  NOESY of compound **75**

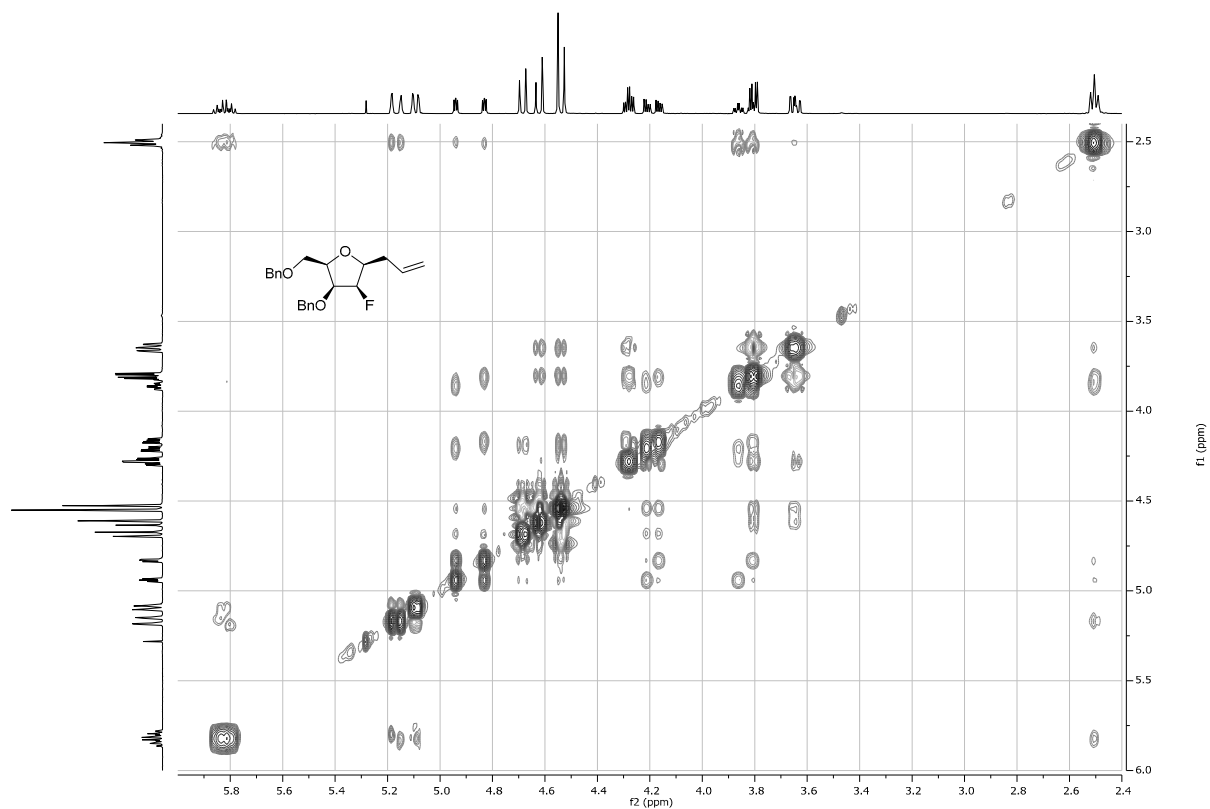



$^1\text{H}$ - $^{13}\text{C}$  HSQC-HECADE of compound **75**

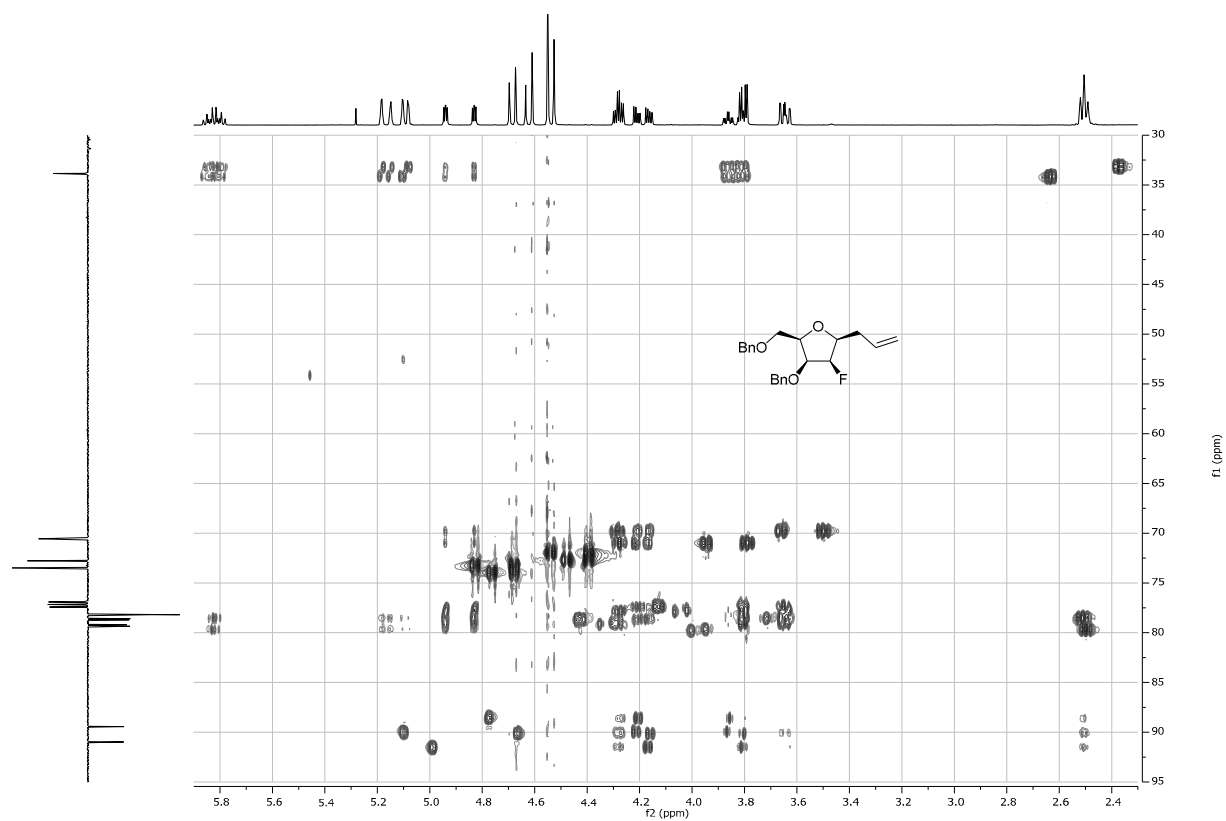

Allyl 3,5-di-O-benzyl-1,2-dideoxy-2-fluoro- $\alpha/\beta$ -D-xylofuranoside (**76**)

$^1\text{H}$  NMR, 500 MHz,  $\text{CDCl}_3$  of compound **76**

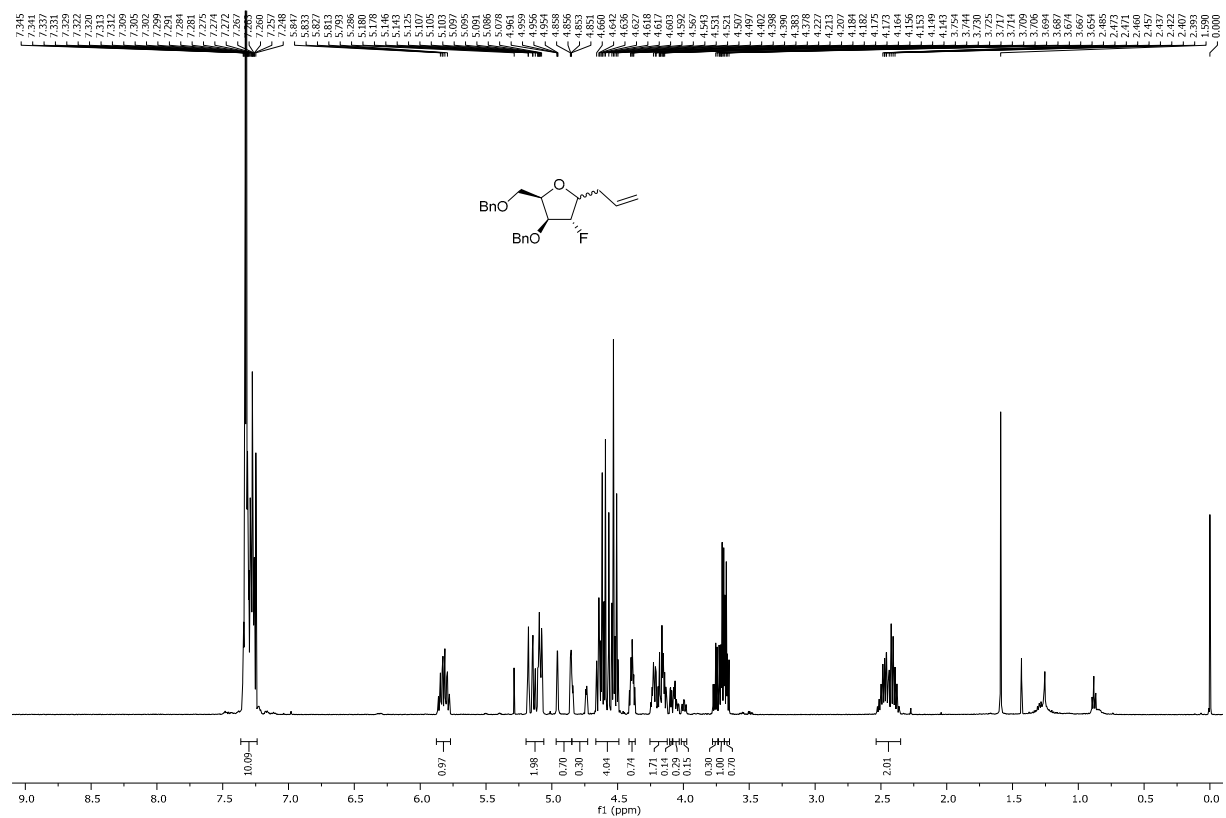

$^{19}\text{F}$ -decoupled  $^1\text{H}$  NMR, (-200 ppm)

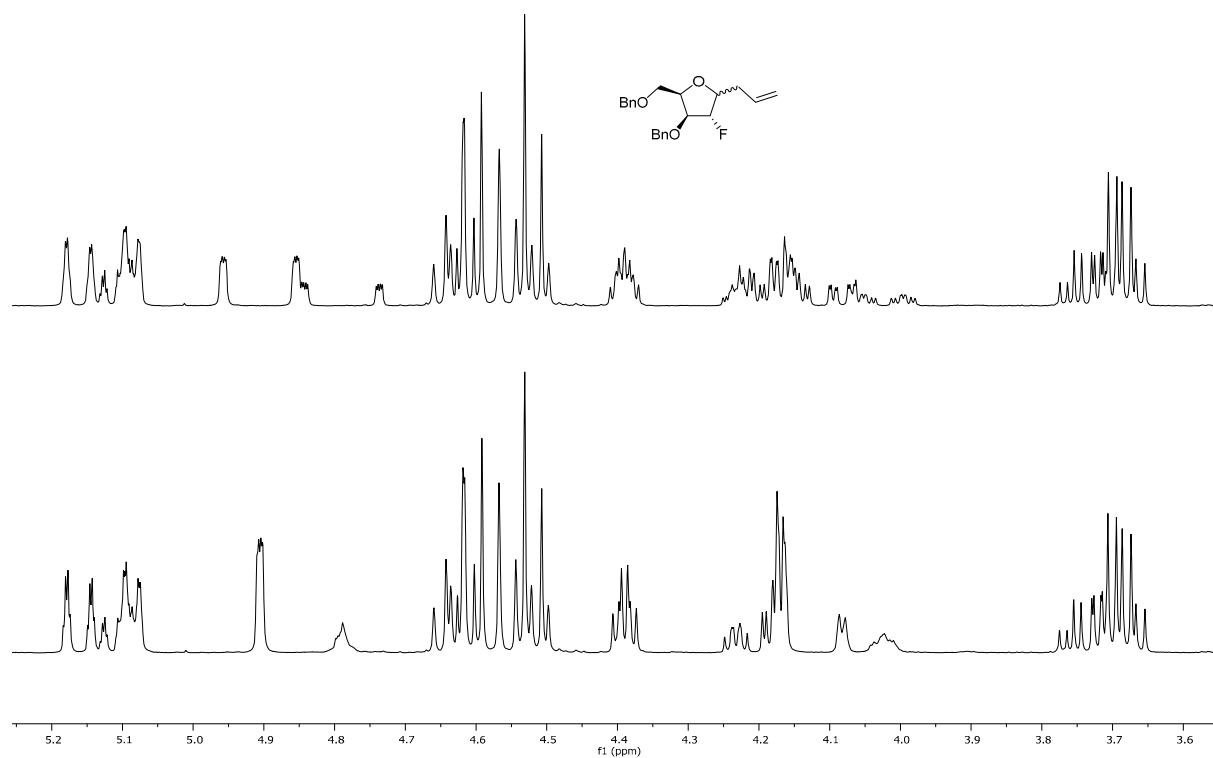

$^{13}\text{C}$ -APT NMR, 126 MHz,  $\text{CDCl}_3$  of compound 76

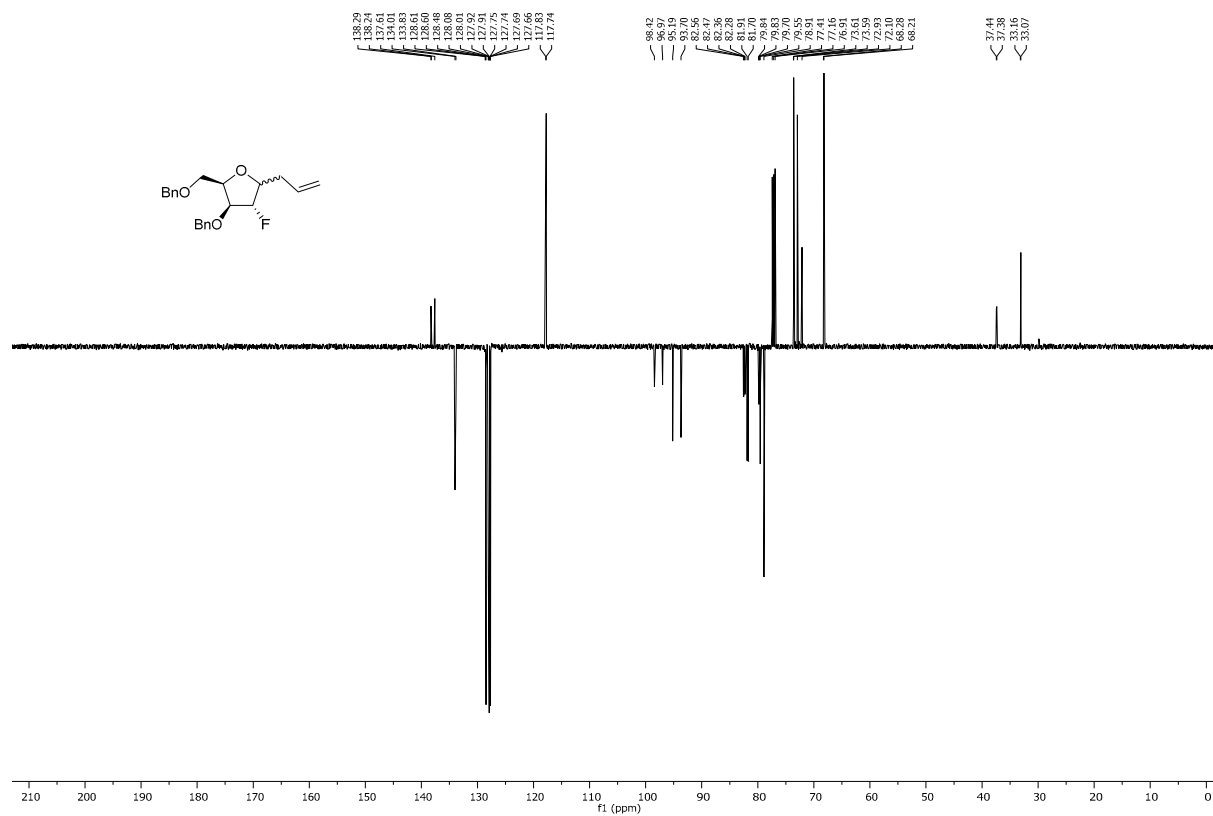

$^{19}\text{F}$  NMR, 471 MHz,  $\text{CDCl}_3$  of compound **76**

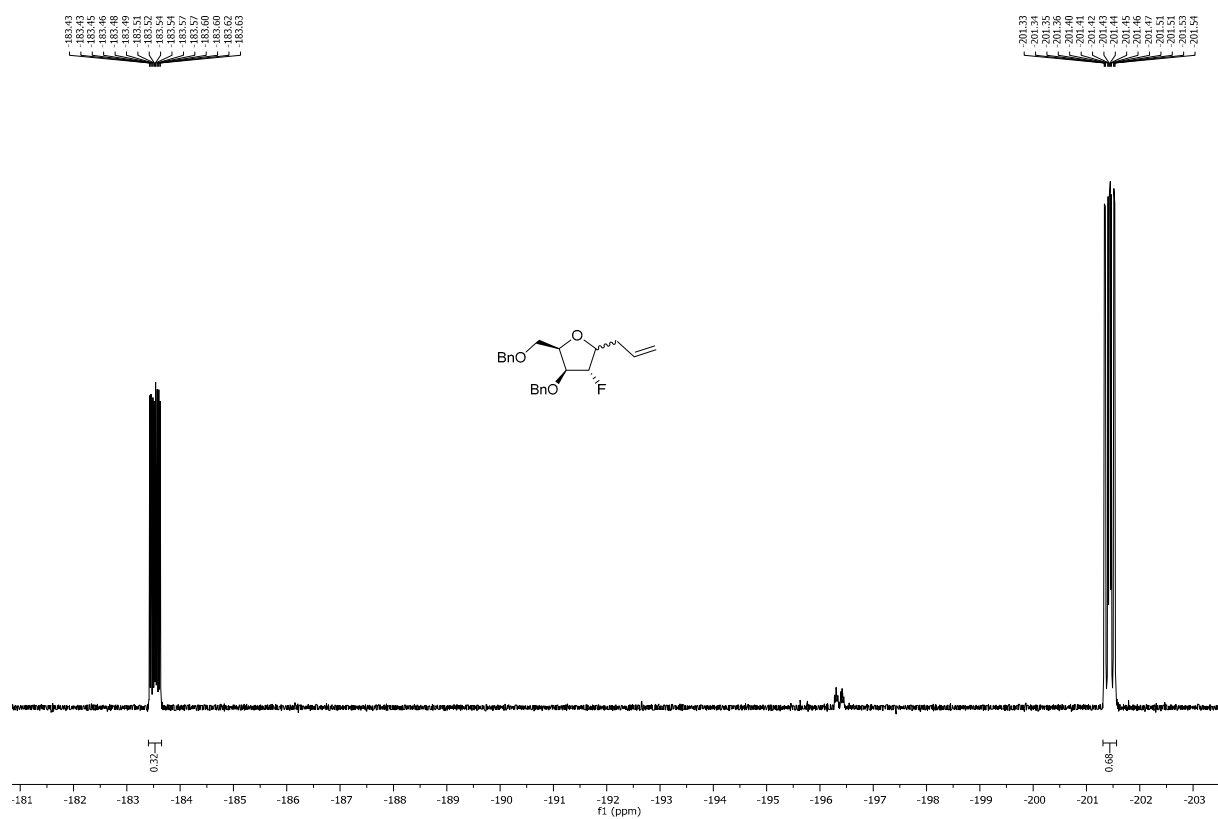

$^1\text{H}$ - $^1\text{H}$  COSY of compound **76**

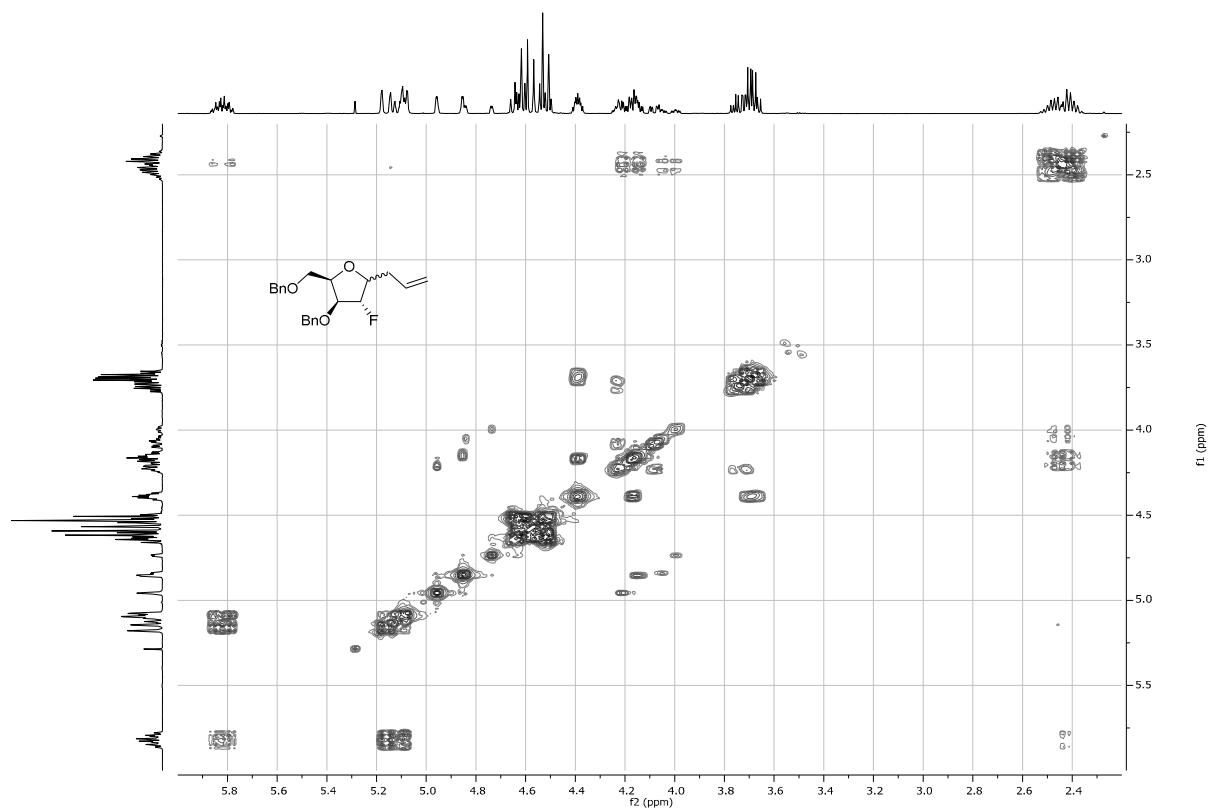

$^1\text{H}$ - $^{13}\text{C}$  HSQC of compound **76**

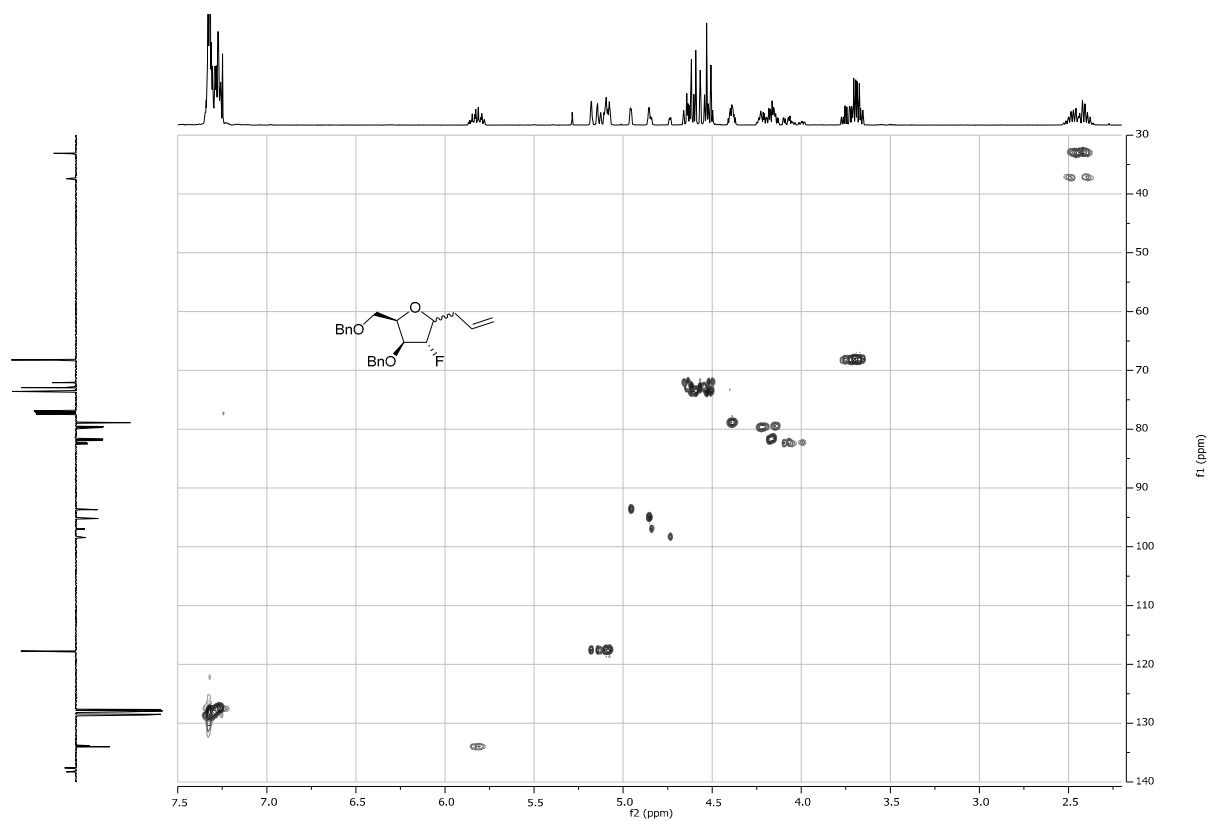

$^1\text{H}$ - $^1\text{H}$  NOESY of compound **76**

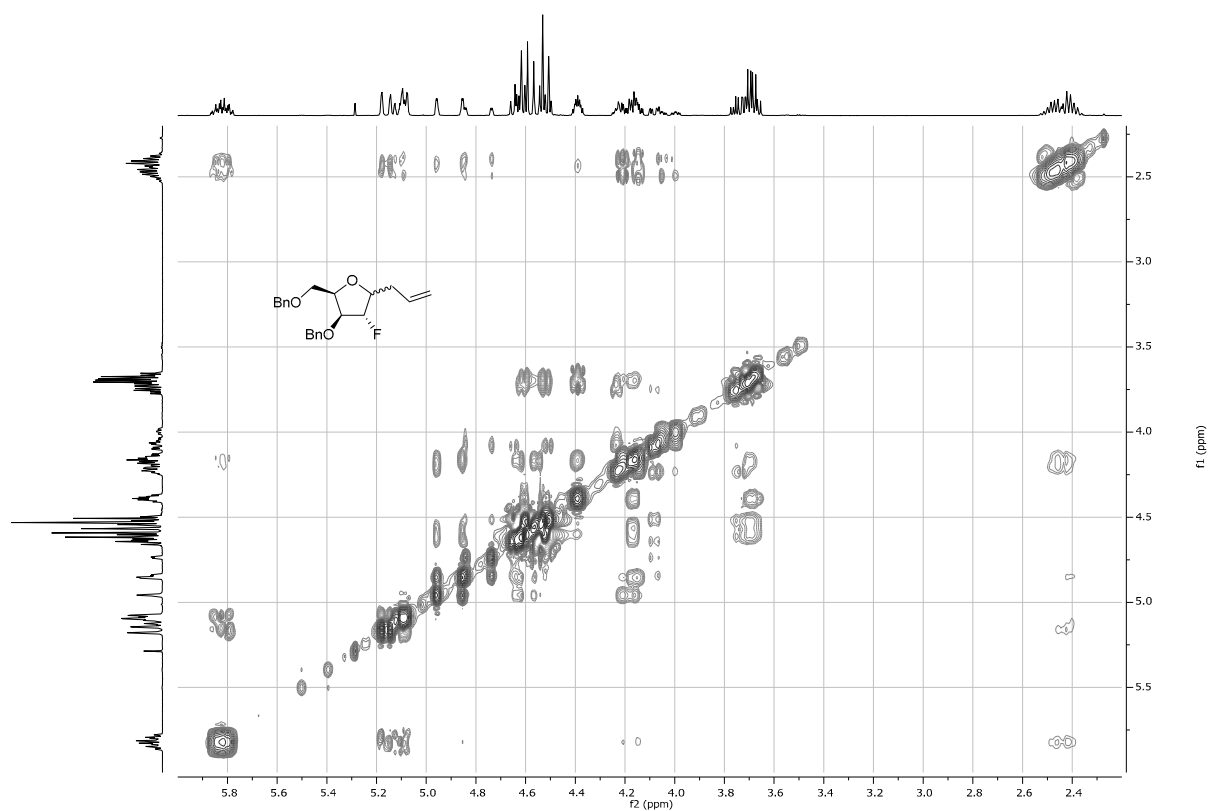

$^1\text{H}$ - $^{13}\text{C}$  HSQC-HECADE of compound **76**

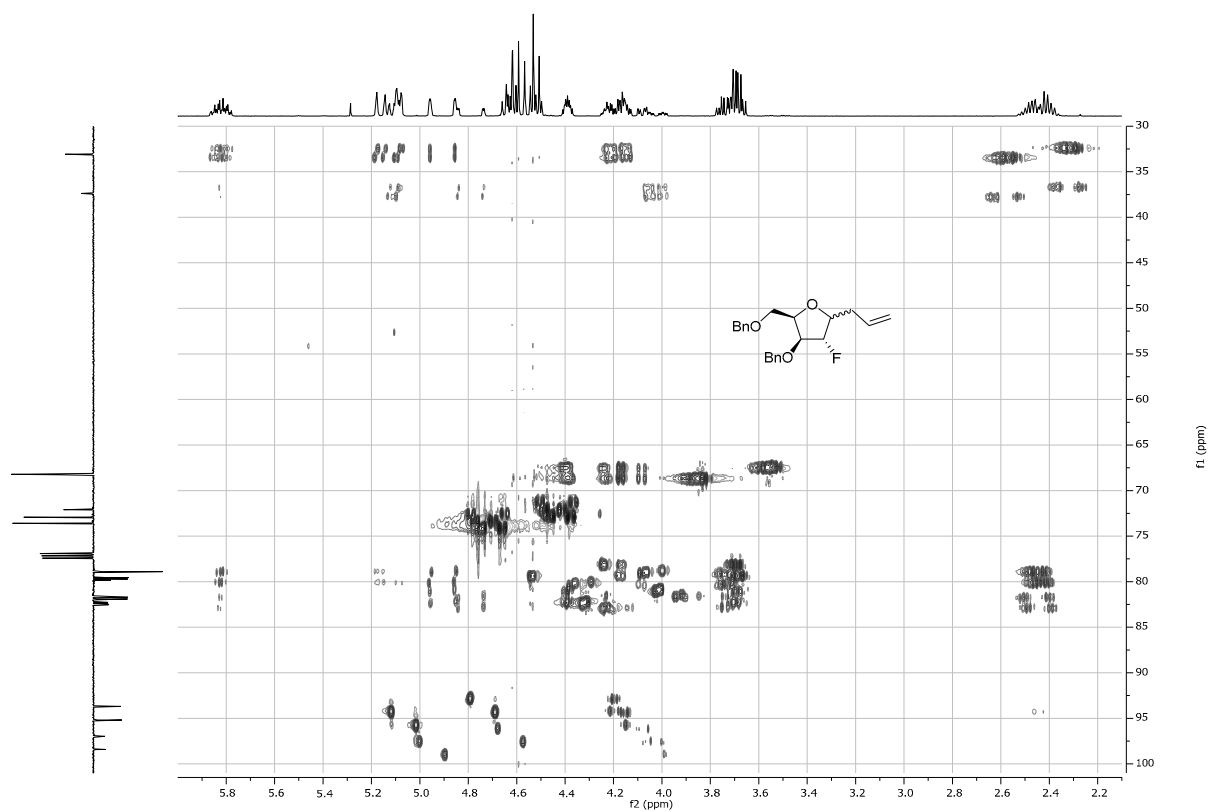

Allyl 2,3,5-tri-*O*-benzyl-1-deoxy- $\beta$ -D-lyxofuranoside (**77**)

$^1\text{H}$  NMR, 400 MHz,  $\text{CDCl}_3$  of compound **77**

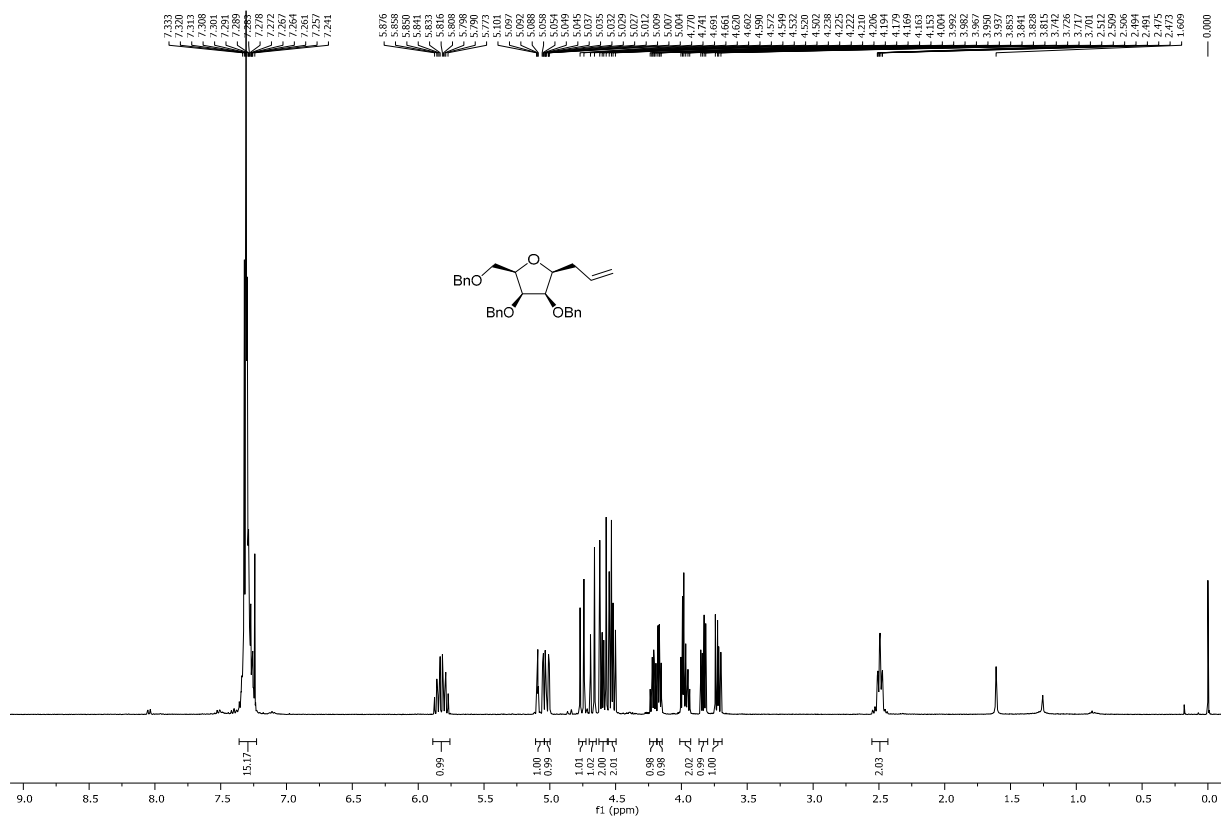

$^{13}\text{C}$ -APT NMR, 101 MHz,  $\text{CDCl}_3$  of compound **77**

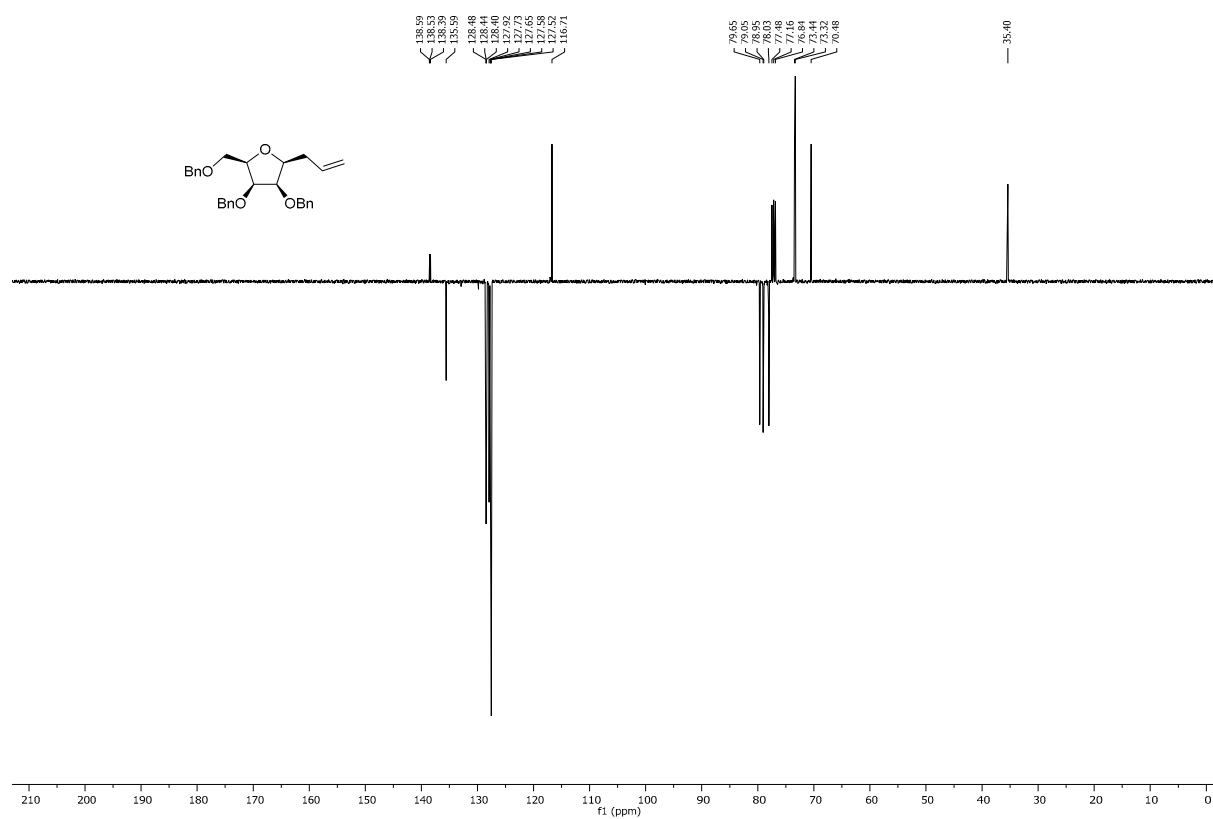

$^1\text{H}$ - $^1\text{H}$  COSY of compound **77**

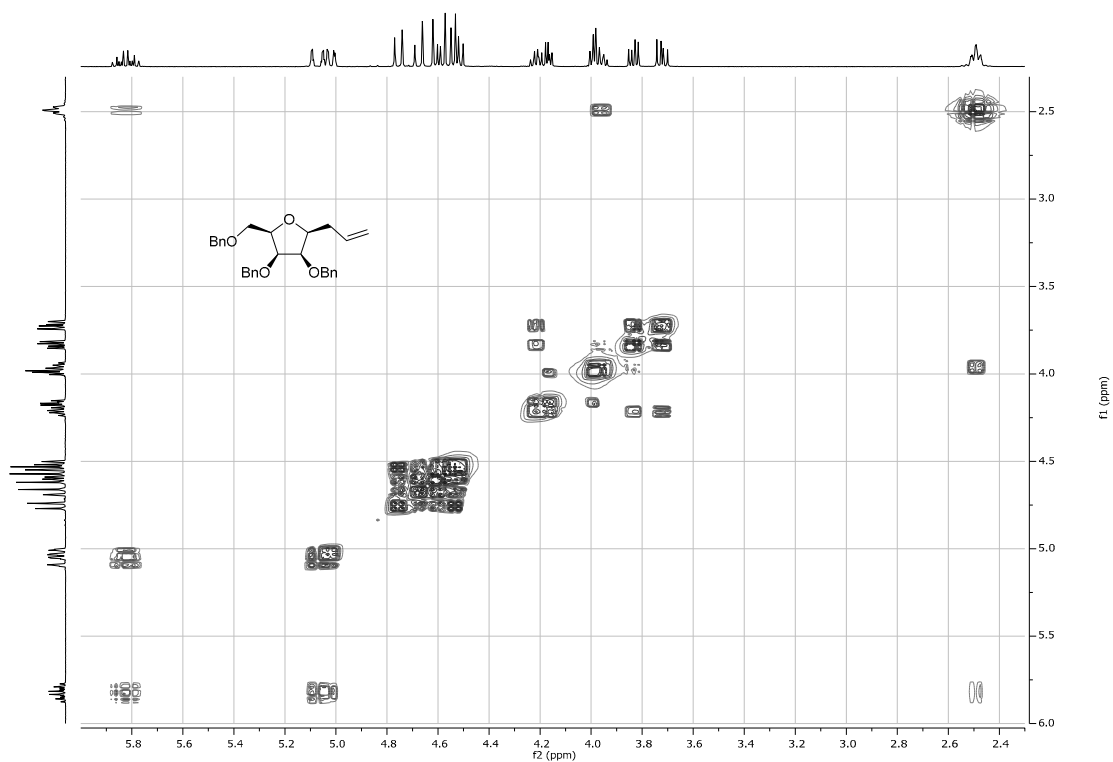

$^1\text{H}$ - $^{13}\text{C}$  HSQC of compound **77**

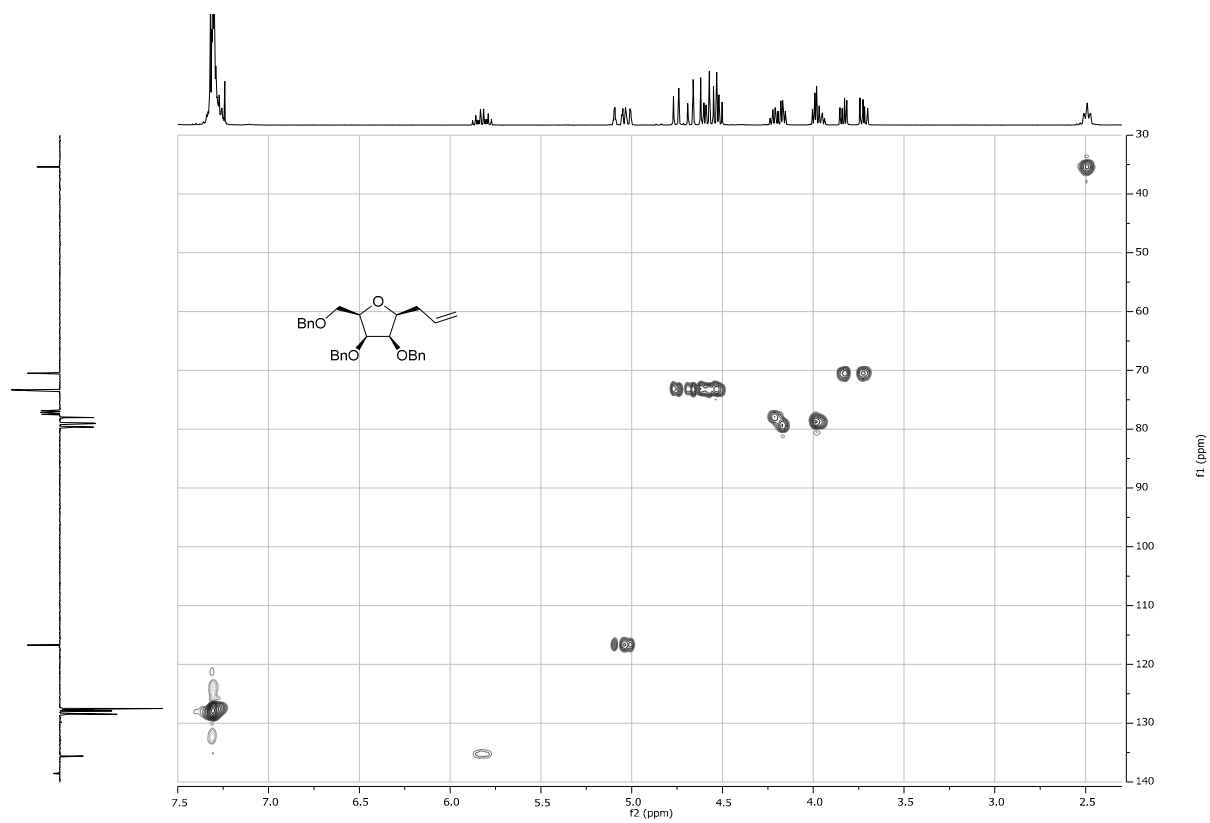

$^1\text{H}$ - $^1\text{H}$  NOESY of compound **77**

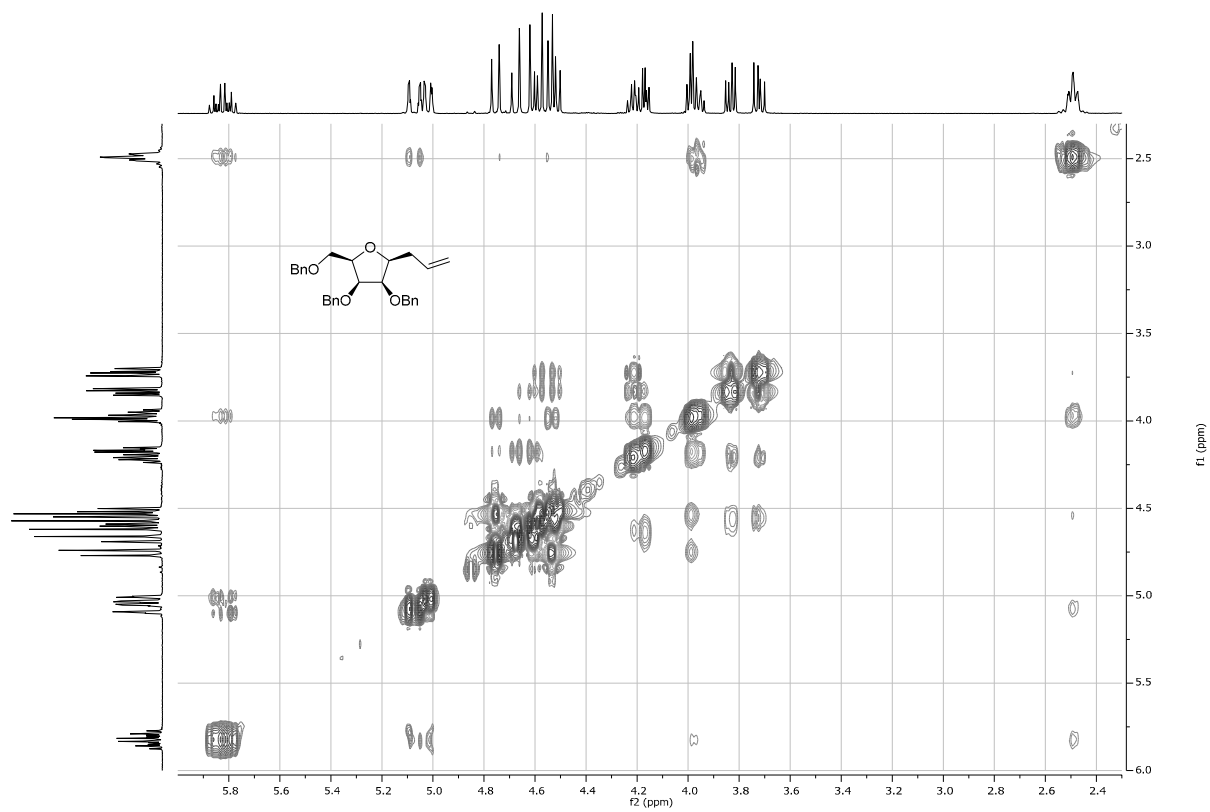

$^1\text{H}$ - $^{13}\text{C}$  HSQC-HECADE of compound **77**

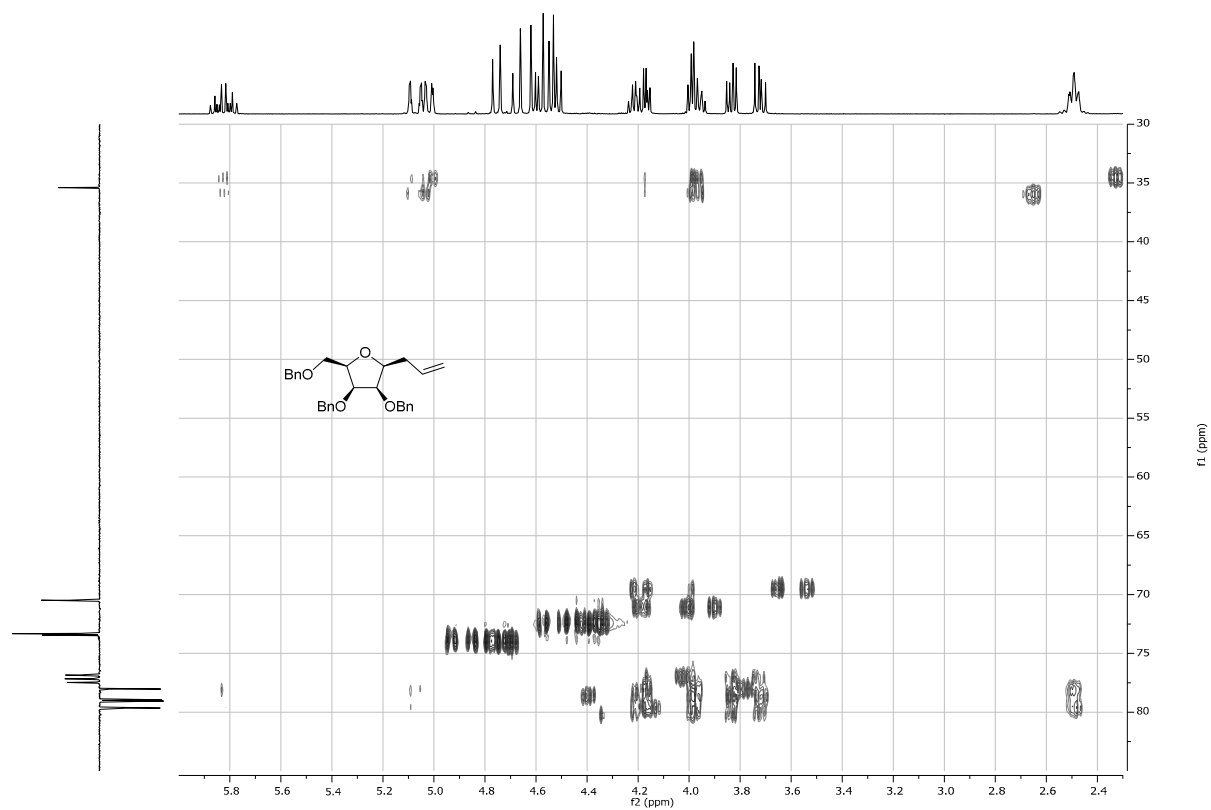

3,5-di-O-benzyl-1,2-dideoxy-2-fluoro-1-N-[phenyl]trifluoroacetyl- $\alpha/\beta$ -D-xylofuranoside (**78**)

$^1\text{H}$  NMR, 500 MHz,  $\text{CDCl}_3$  of compound **78**

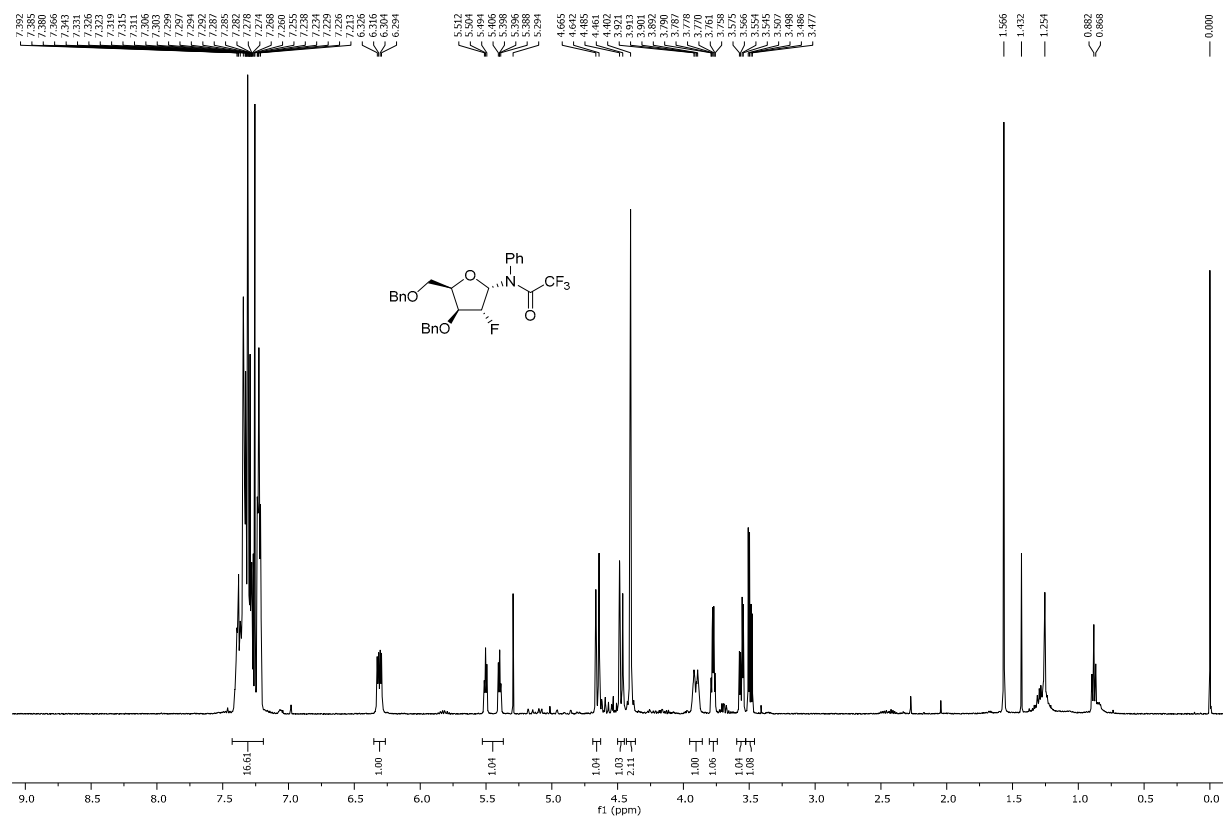



$^{19}\text{F}$ -decoupled  $^1\text{H}$  NMR, (-200 ppm)

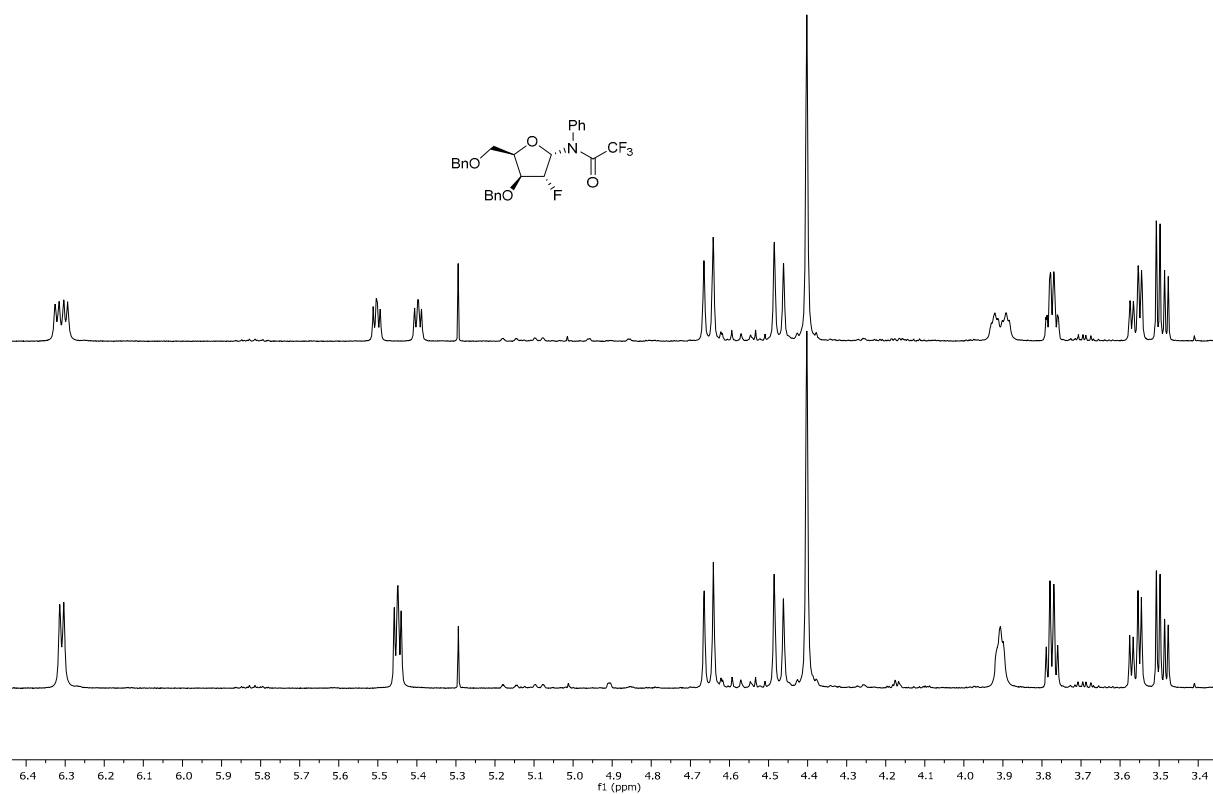

$^{13}\text{C}$ -APT NMR, 101 MHz,  $\text{CDCl}_3$  of compound **78**

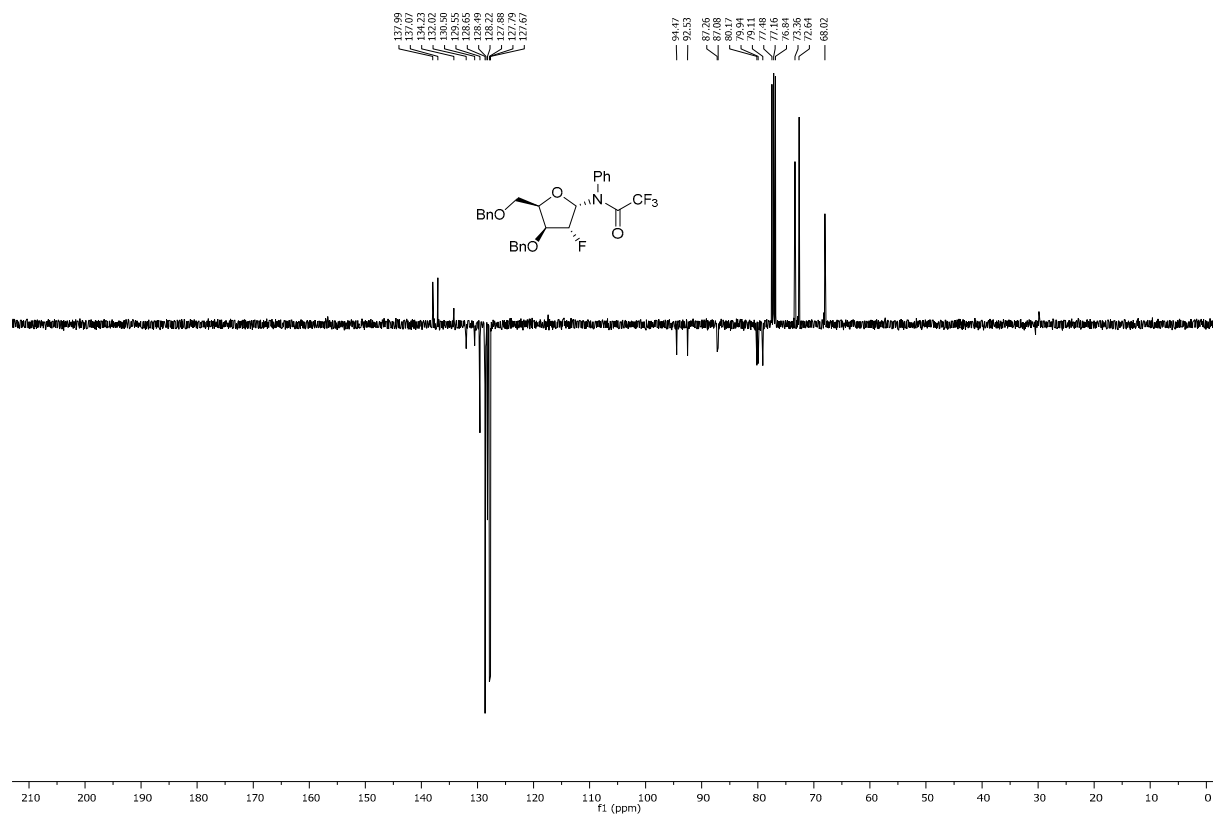

<sup>19</sup>F NMR, 471 MHz, CDCl<sub>3</sub> of compound **78**

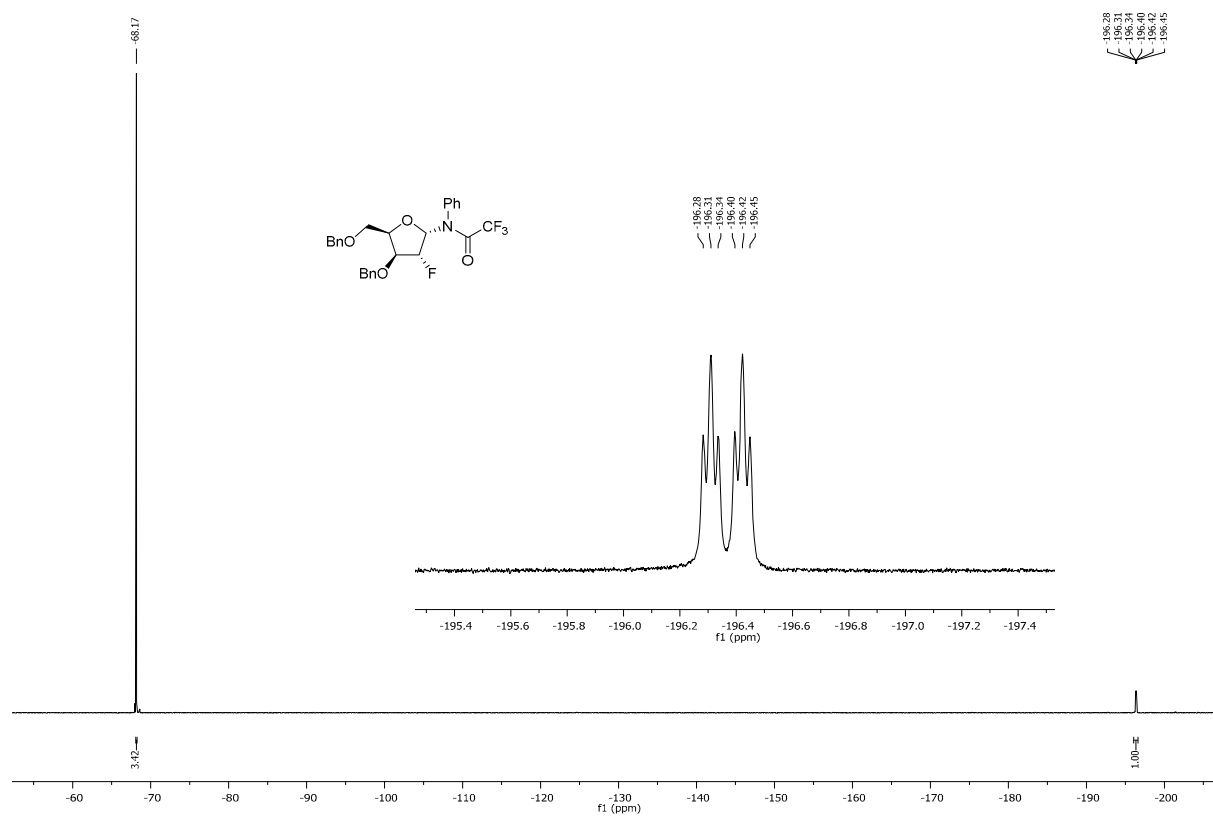

<sup>1</sup>H-<sup>1</sup>H COSY of compound **78**

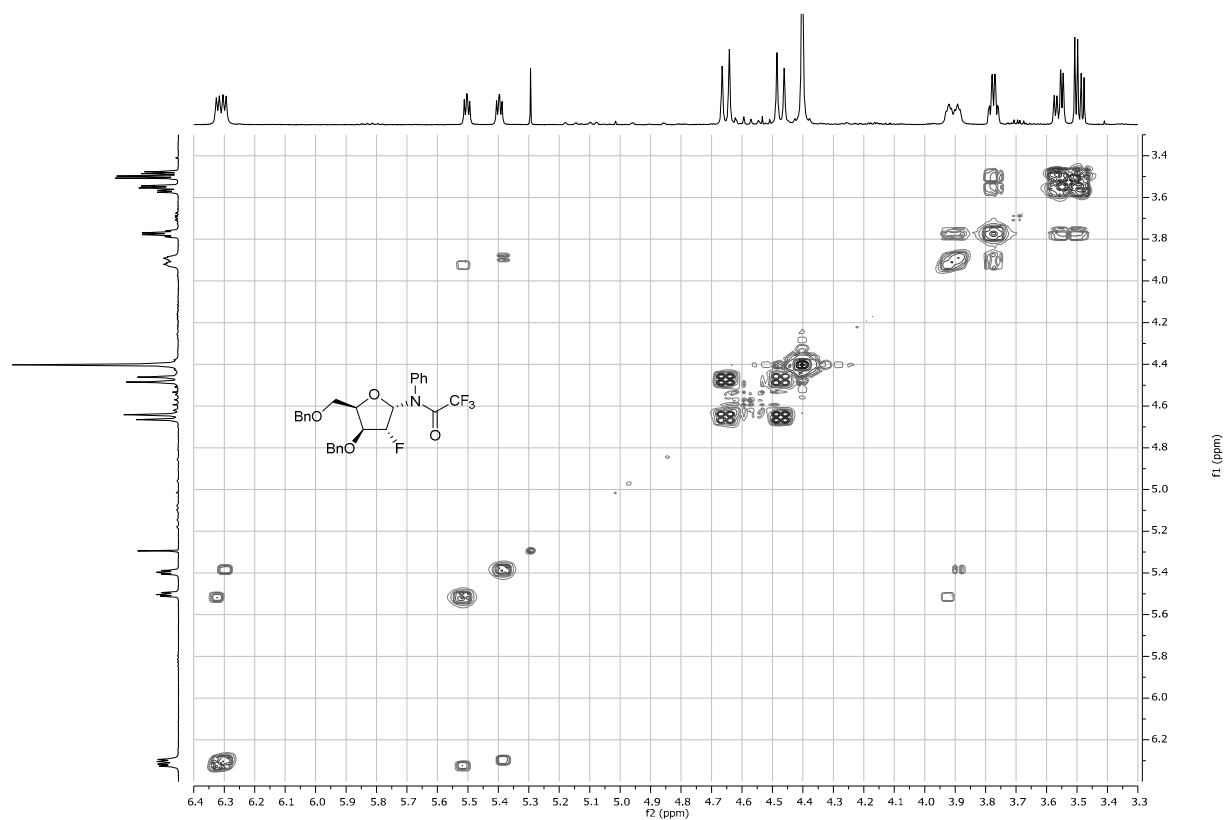

$^1\text{H}$ - $^{13}\text{C}$  HSQC of compound **78**

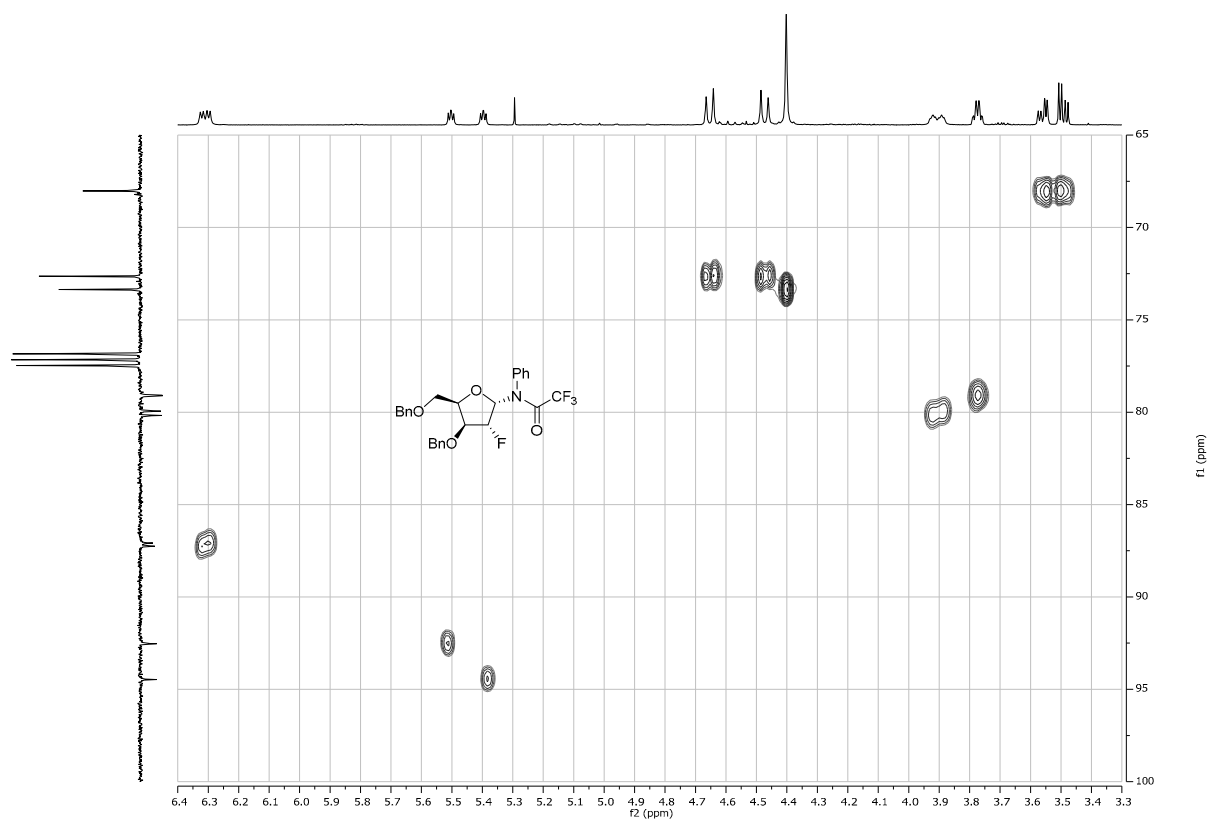

$^1\text{H}$ - $^1\text{H}$  NOESY of compound **78**

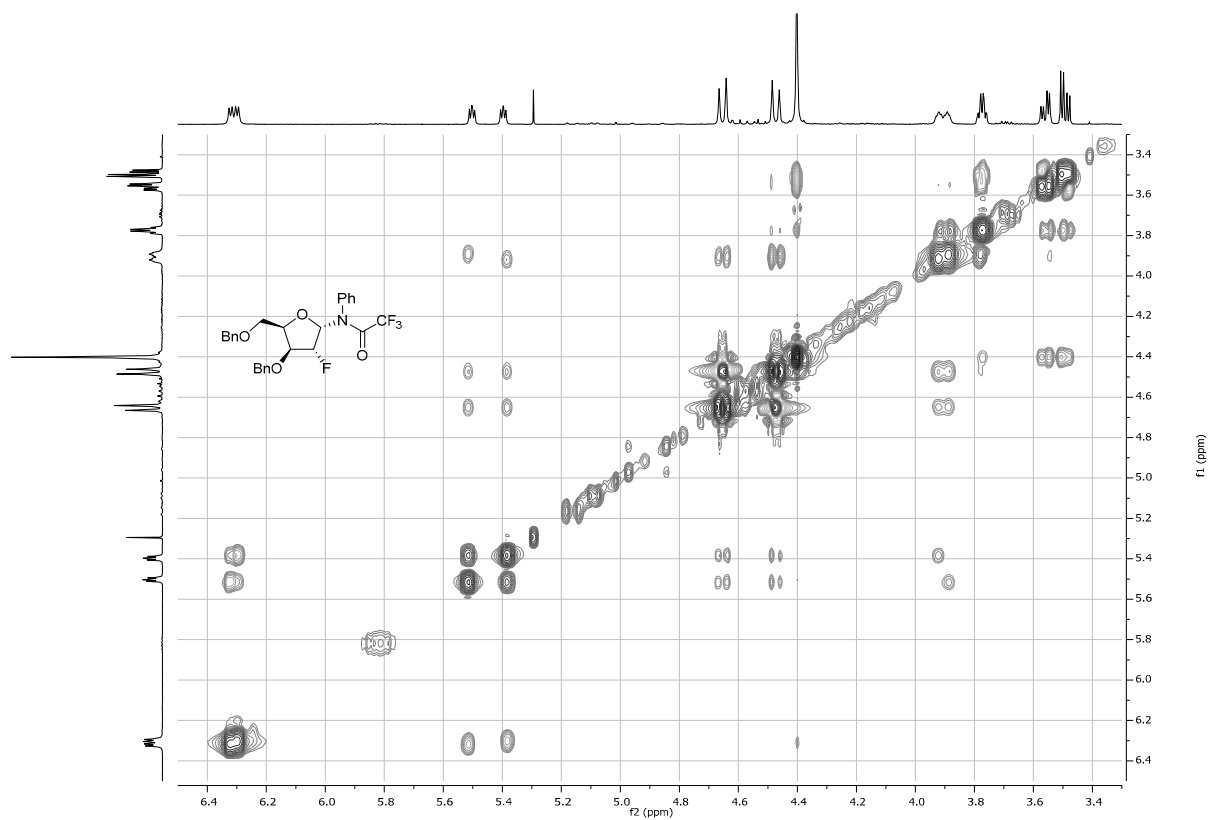

Methyl (2,3-di-O-benzyl-1-deoxy-1-N-[phenyl]trifluoroacetyl- $\alpha/\beta$ -D-xylofuranosyl uronate) (**80**).

$^1\text{H}$  NMR, 500 MHz,  $\text{CDCl}_3$  of compound **80**

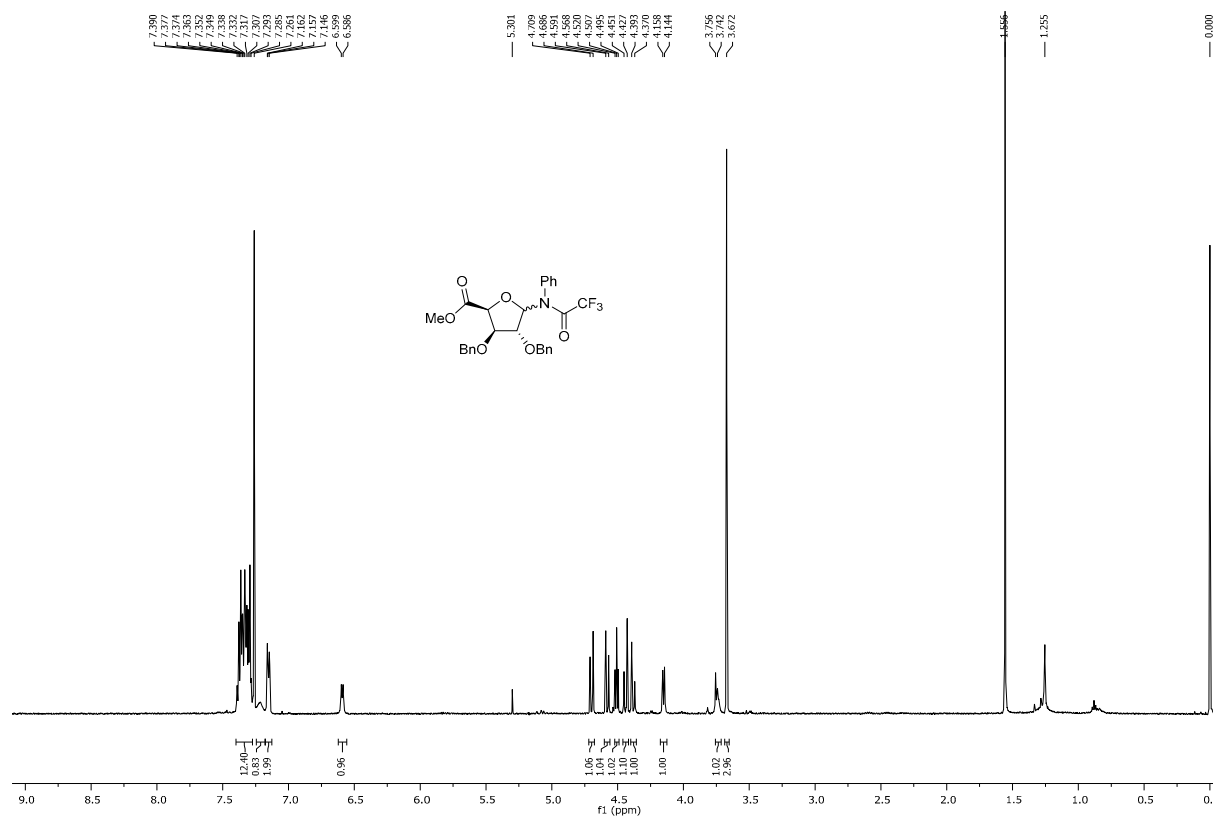

$^{13}\text{C}$ -APT NMR, 126 MHz,  $\text{CDCl}_3$  of compound **80** is reported for the mixed fraction, see **68**

$^{19}\text{F}$  NMR, 471 MHz,  $\text{CDCl}_3$  of compound **80**

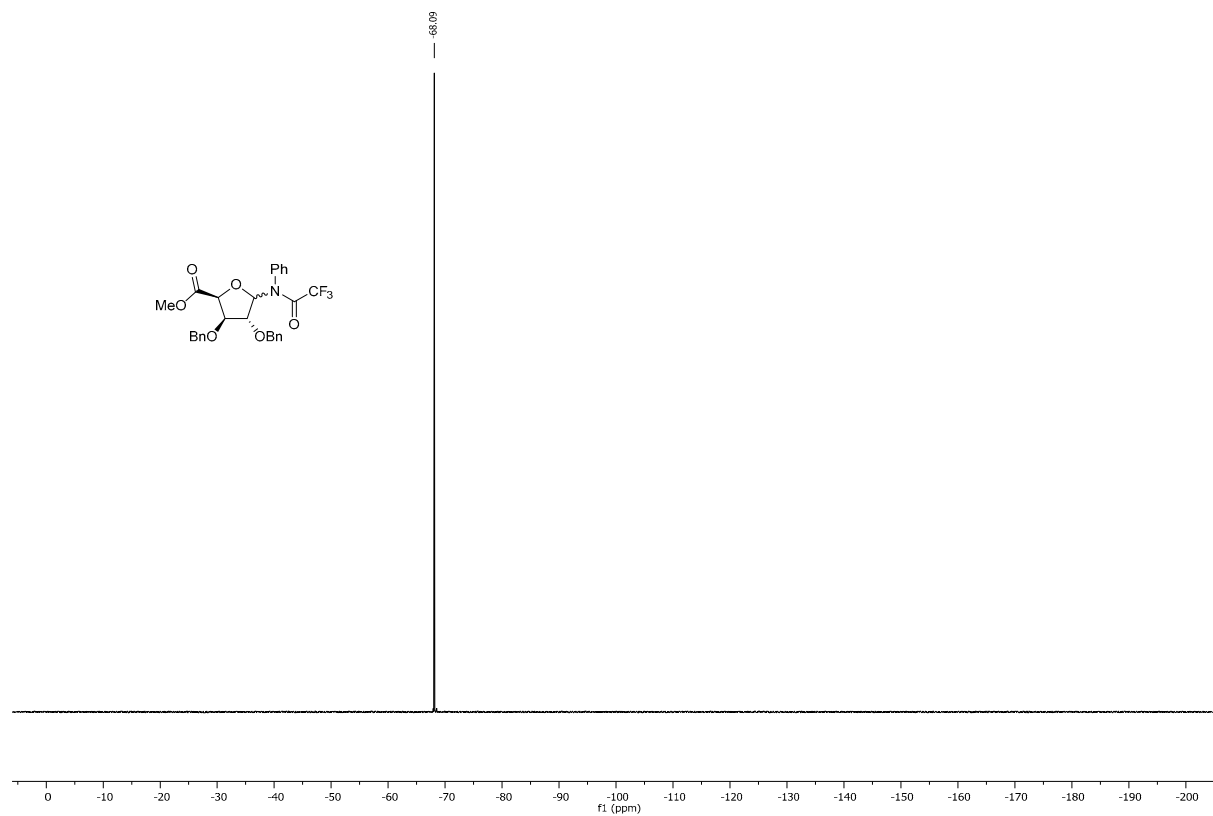

$^1\text{H}$ - $^1\text{H}$  COSY of compound **80**

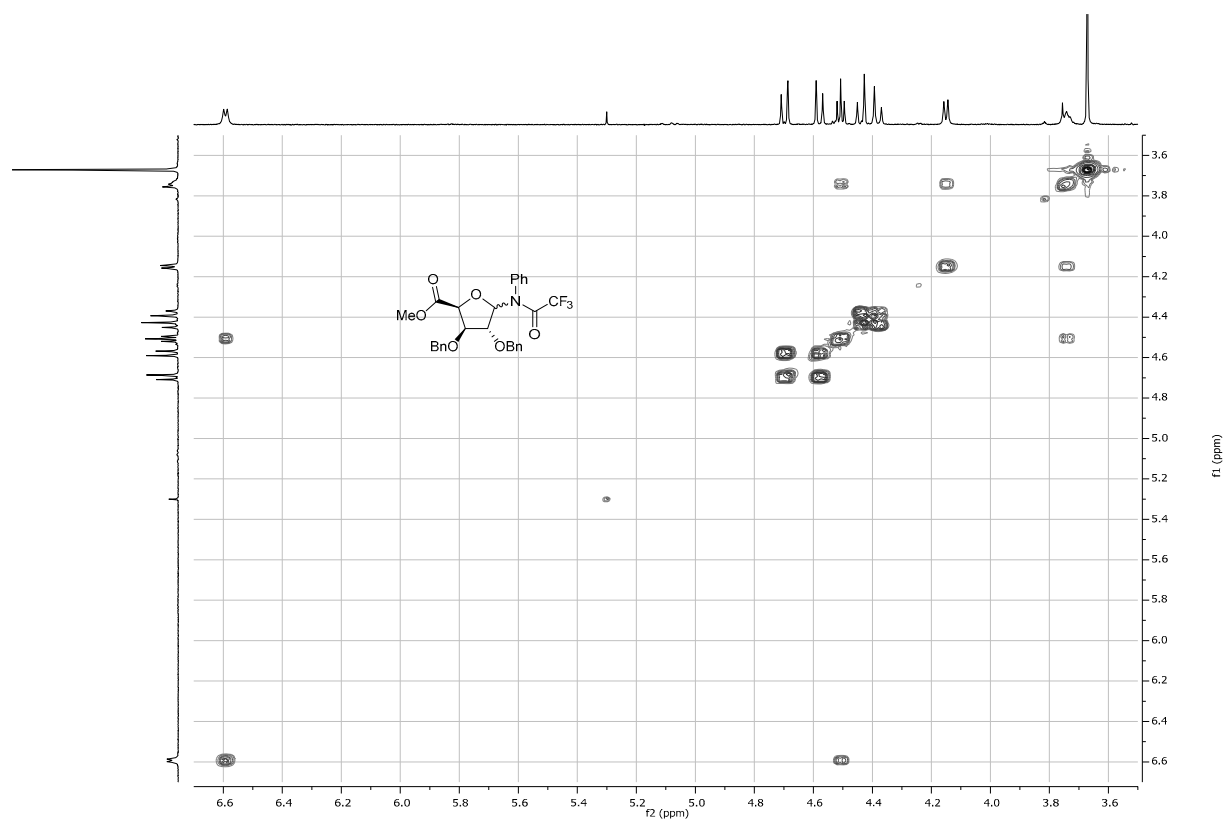

$^1\text{H}$ - $^{13}\text{C}$  HSQC of compound **80**

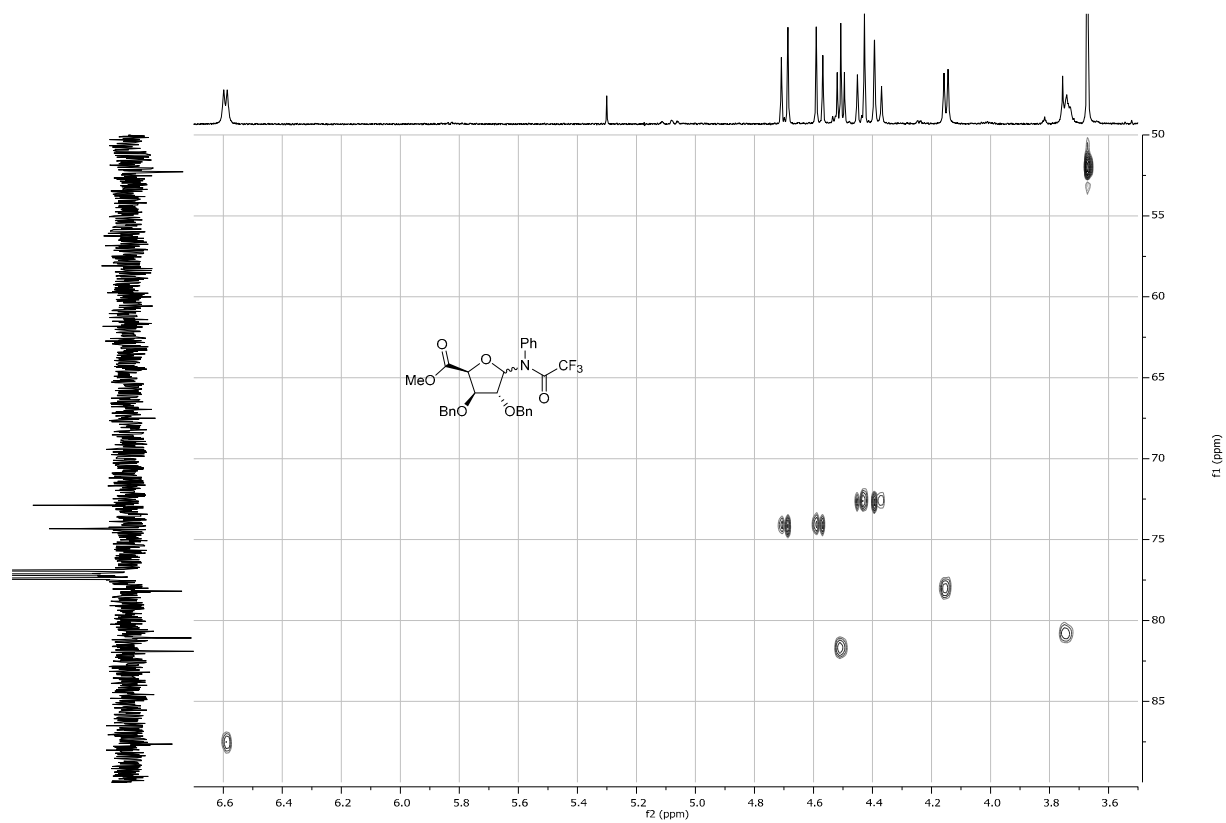

$^1\text{H}$ - $^1\text{H}$  NOESY of compound **80**

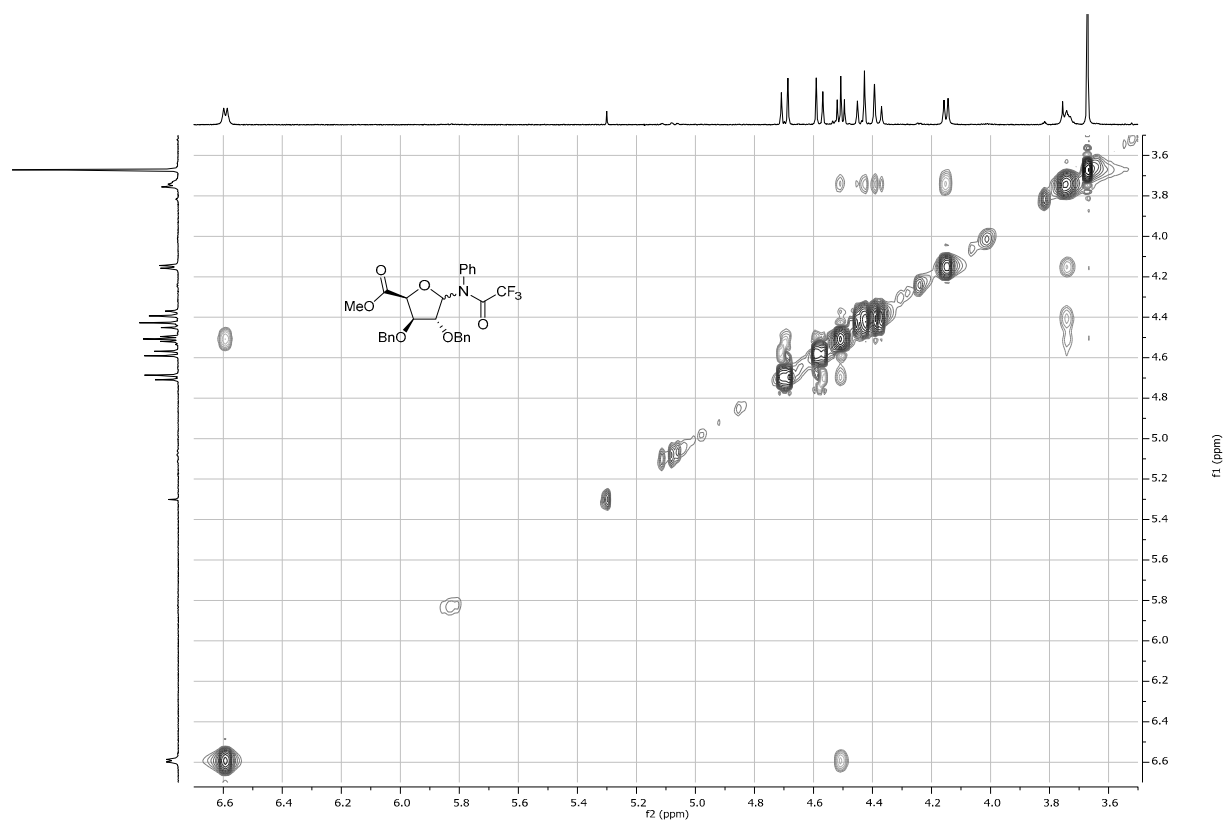

Methyl (2*S*,3*R*,3*aS*,9*bR*)-3-(benzyloxy)-3,3*a*,5,9*b*-tetrahydro-2*H*-furo[3,2-*c*]isochromene-2-carboxylate (**81**)

$^1\text{H}$  NMR, 500 MHz,  $\text{CDCl}_3$  of compound **81**

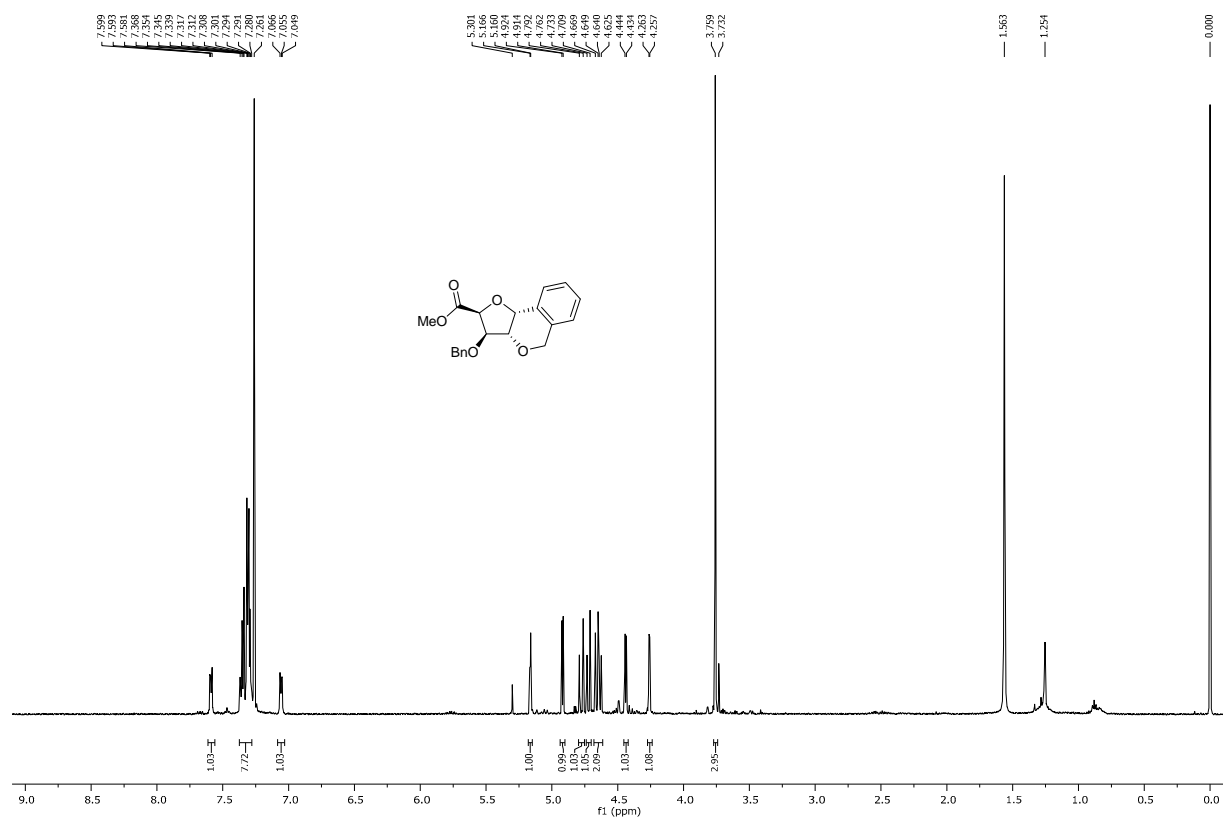

$^{13}\text{C}$ -APT NMR, 126 MHz,  $\text{CDCl}_3$  of compound **81**

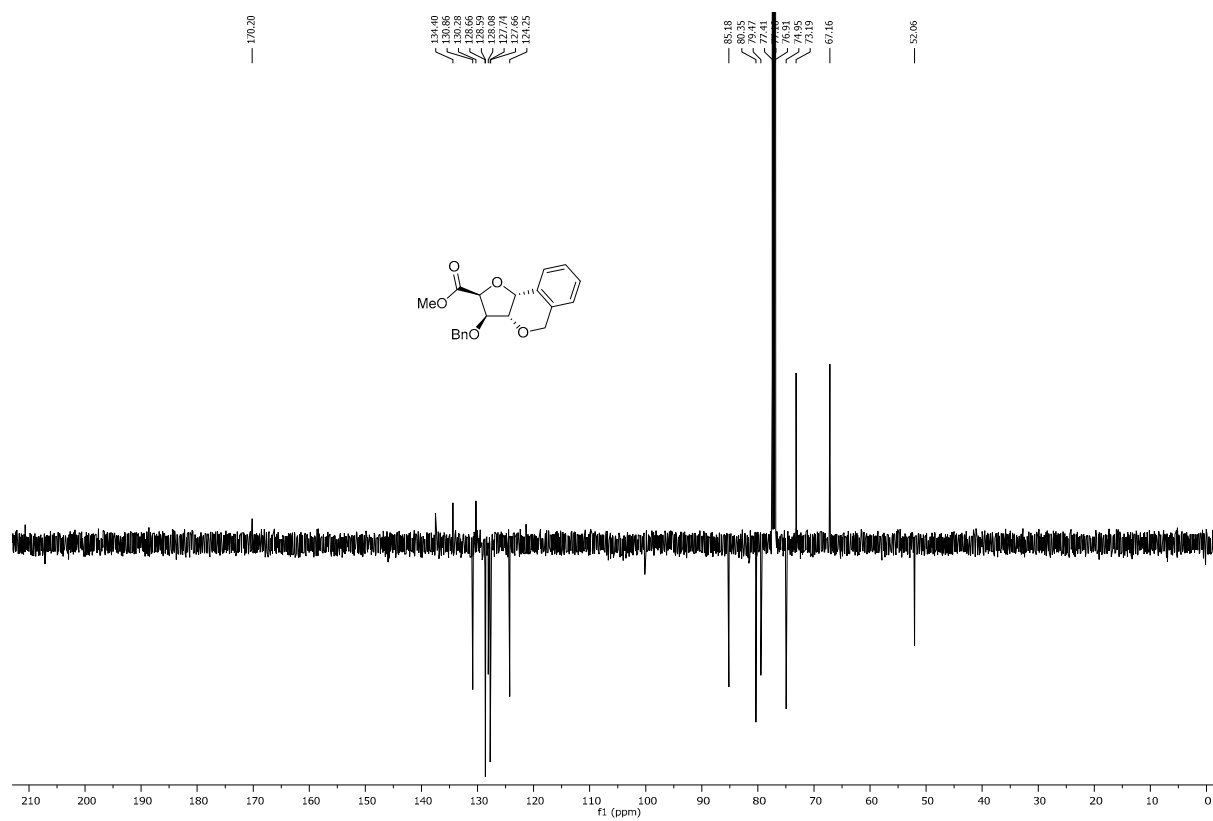

$^1\text{H}$ - $^1\text{H}$  COSY of compound **81**

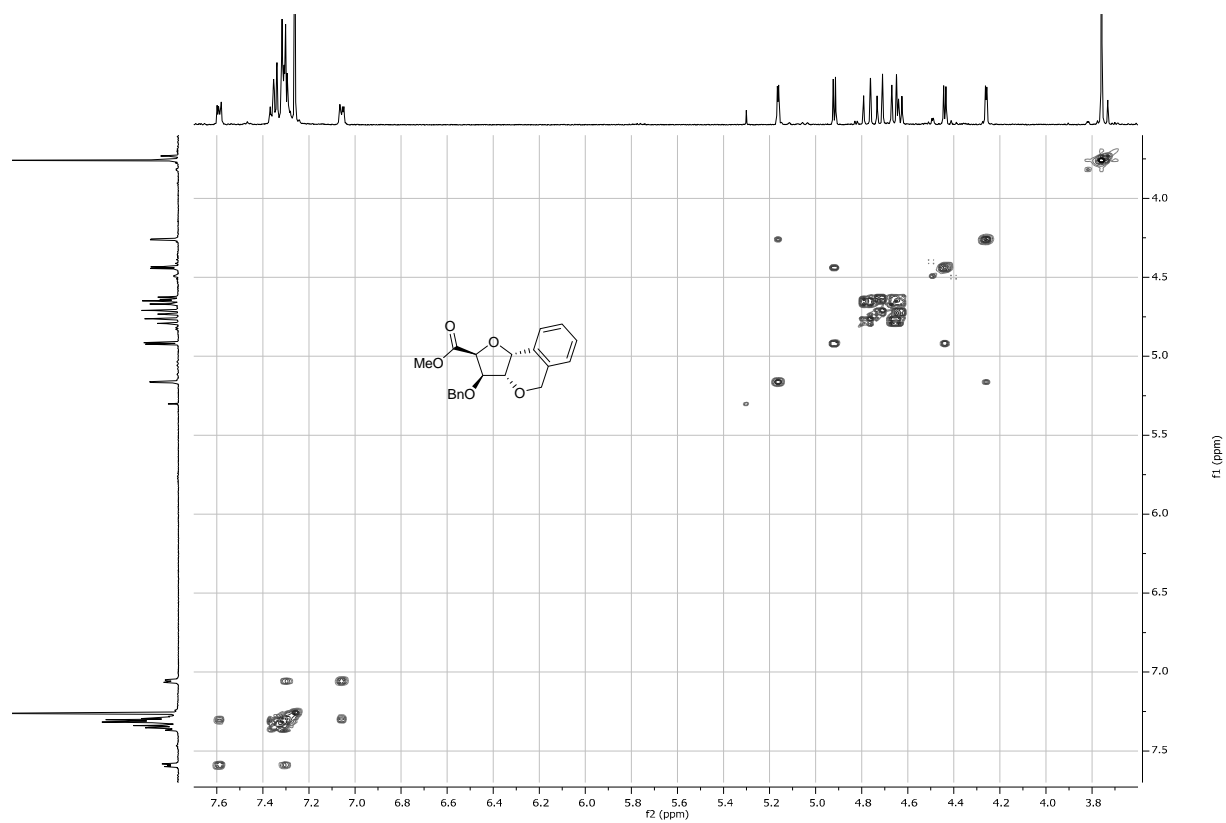





$^1\text{H}$ - $^1\text{H}$  NOESY of compound **81**

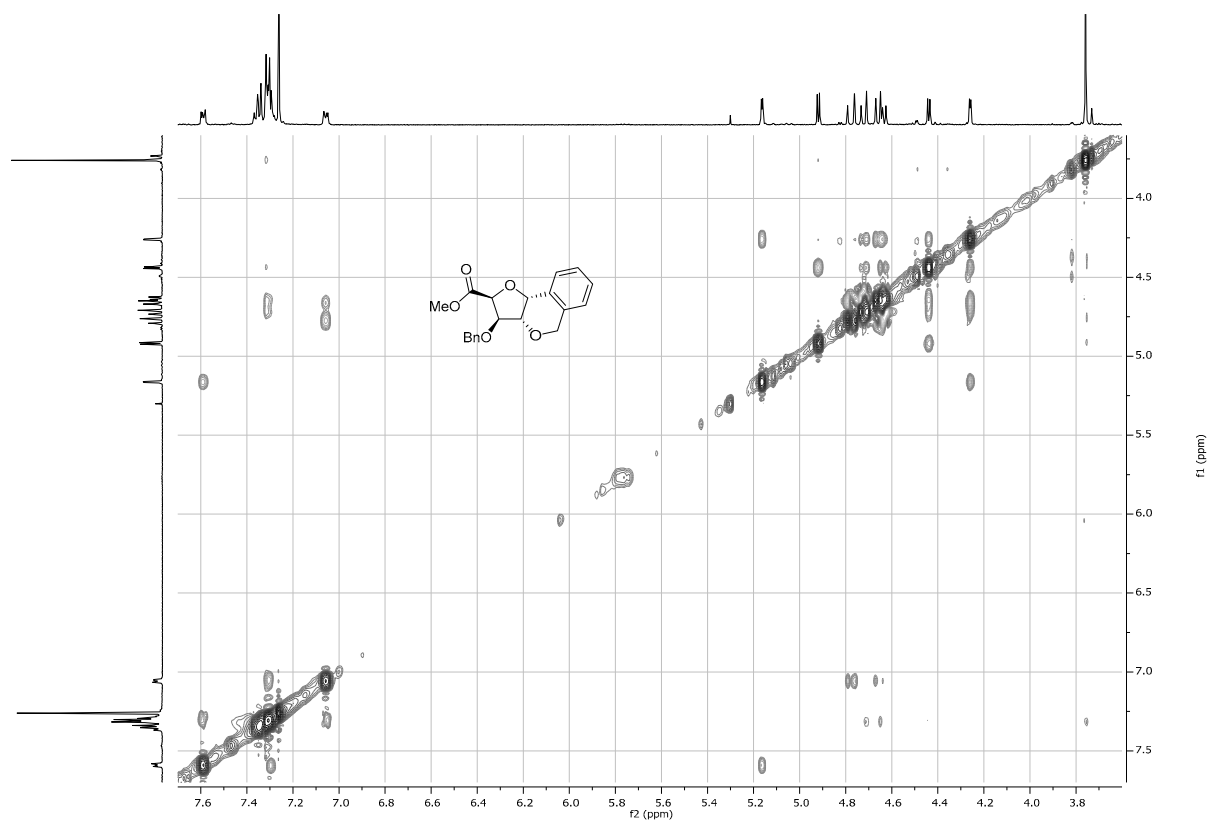

Methyl (2,3-di-*O*-benzyl-1-deoxy-1-*N*-[phenyl]trifluoroacetyl- $\alpha$ -D-ribofuranosyl uronate) (**99**)

$^1\text{H}$  NMR, 500 MHz,  $\text{CDCl}_3$  of compound **99**

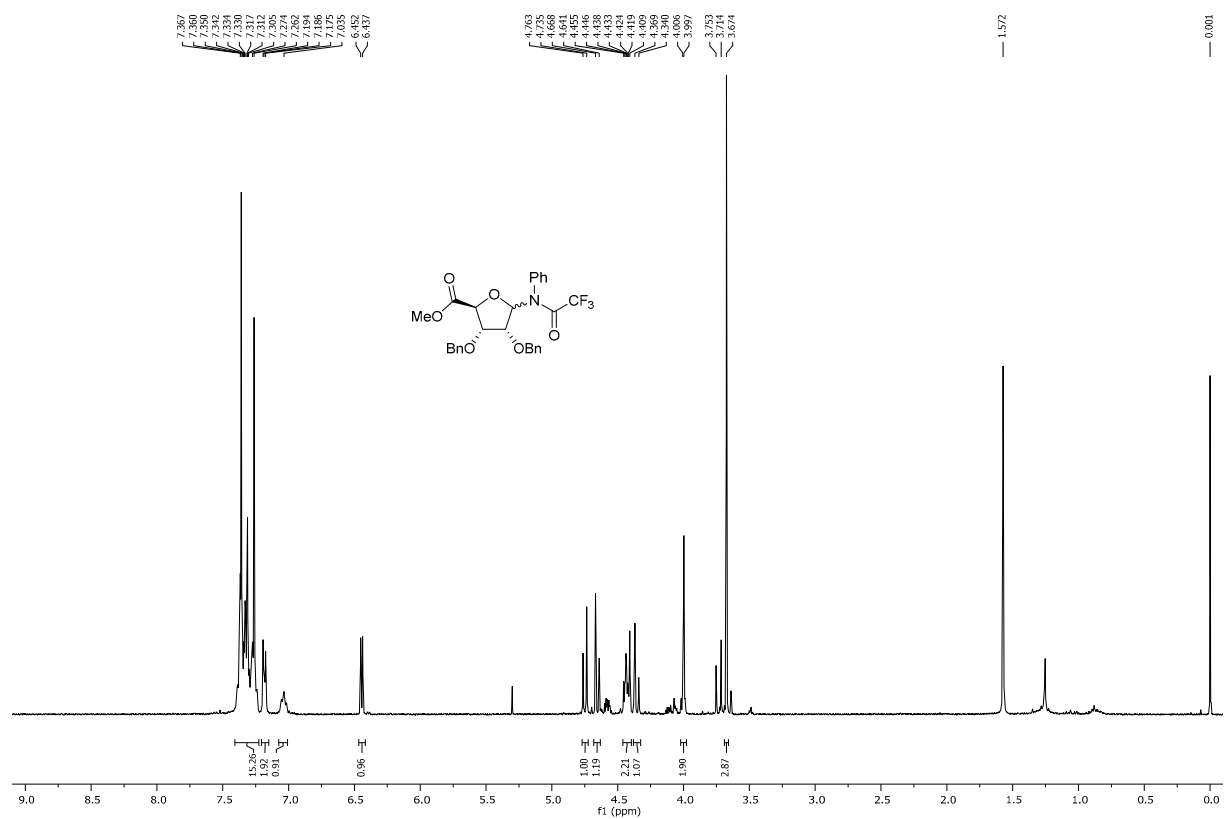

$^{13}\text{C}$ -APT NMR, 126 MHz,  $\text{CDCl}_3$  of compound **99**

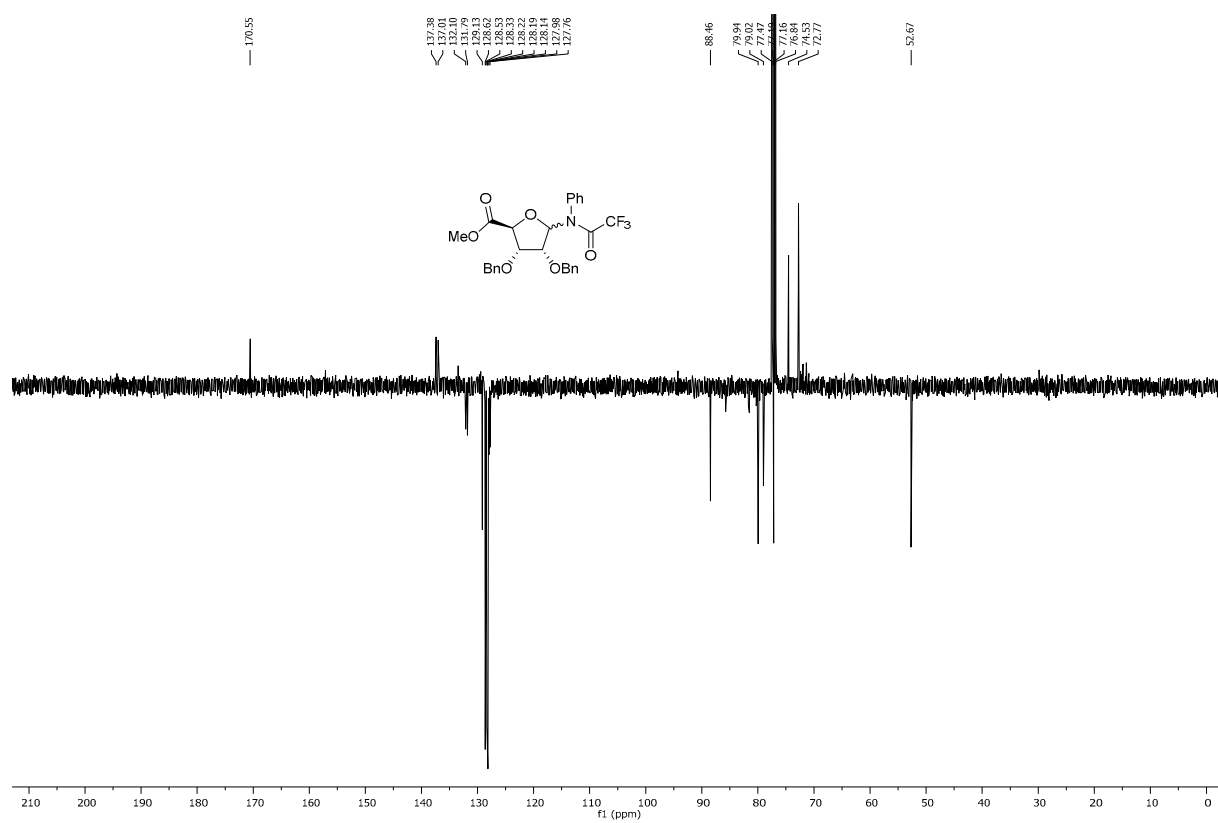

$^{19}\text{F}$  NMR, 471 MHz,  $\text{CDCl}_3$  of compound **99**

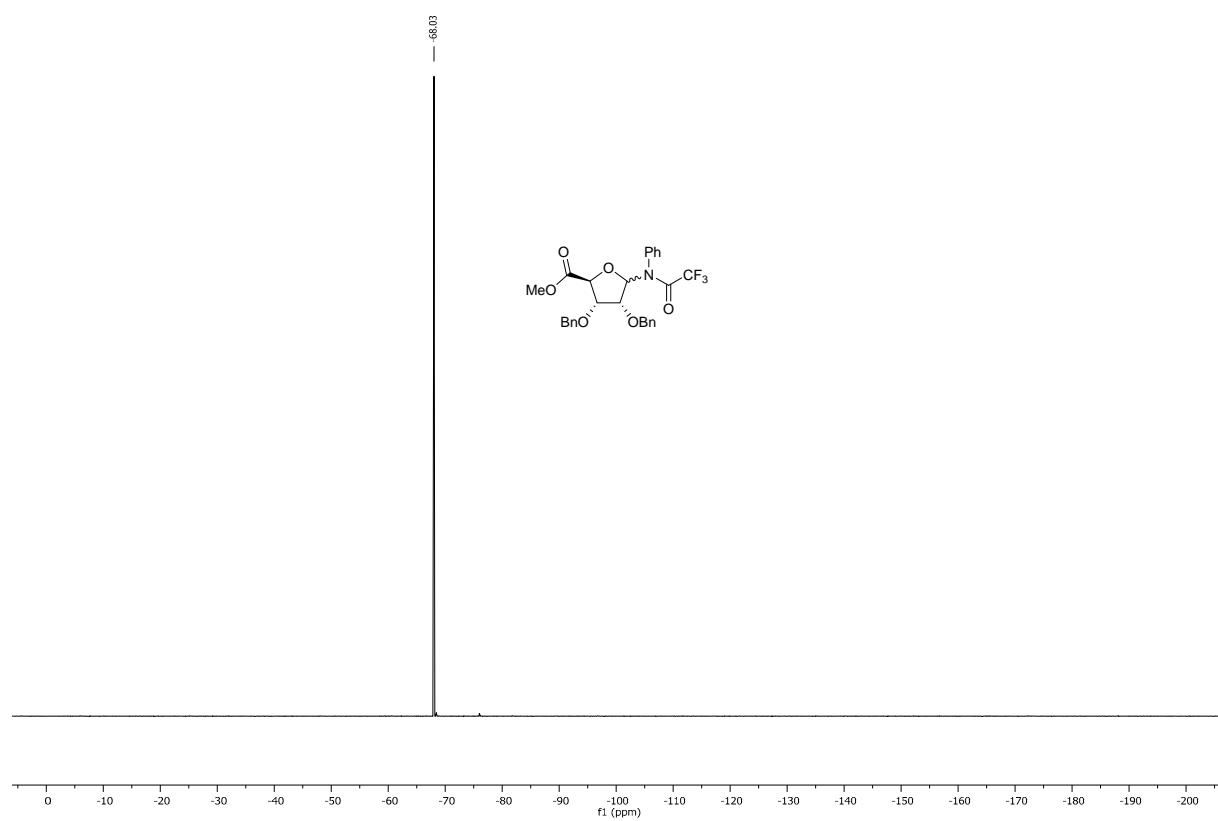

$^1\text{H}$ - $^1\text{H}$  COSY of compound **99**

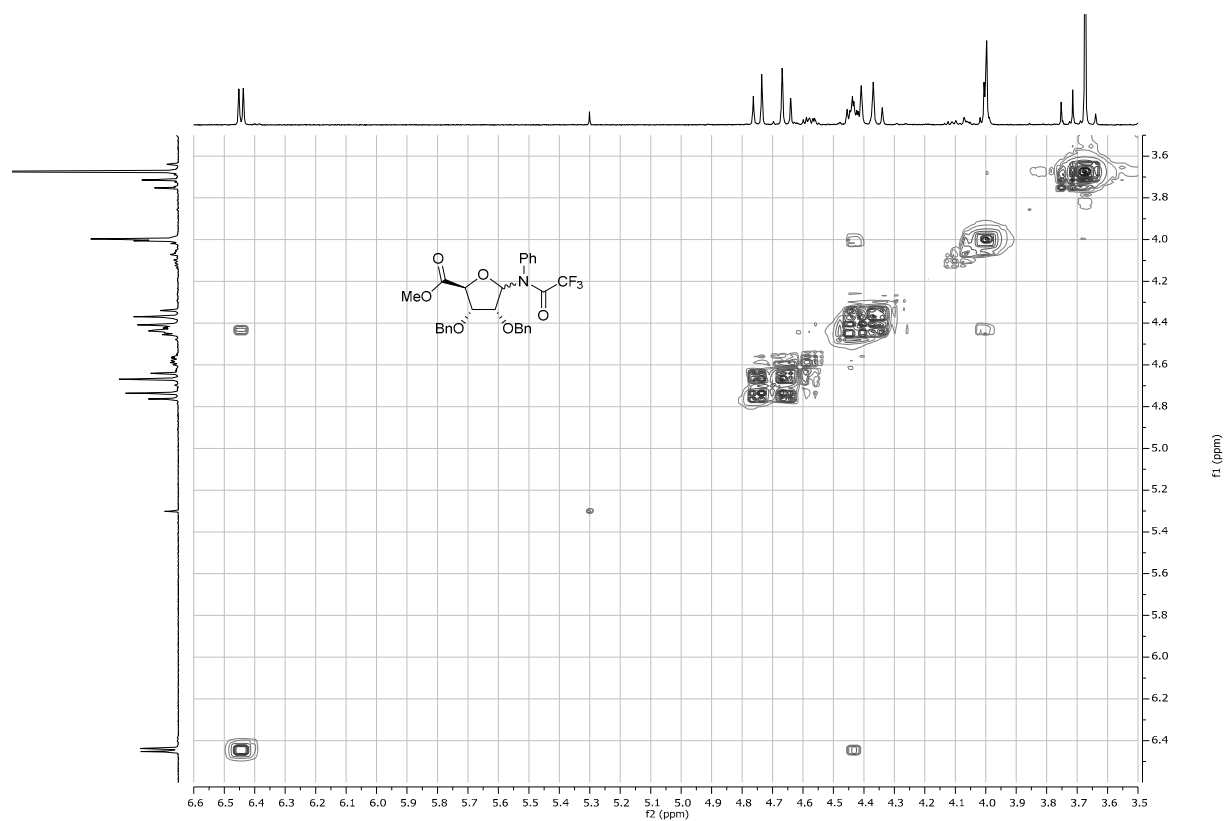

$^1\text{H}$ - $^{13}\text{C}$  HSQC of compound **99**

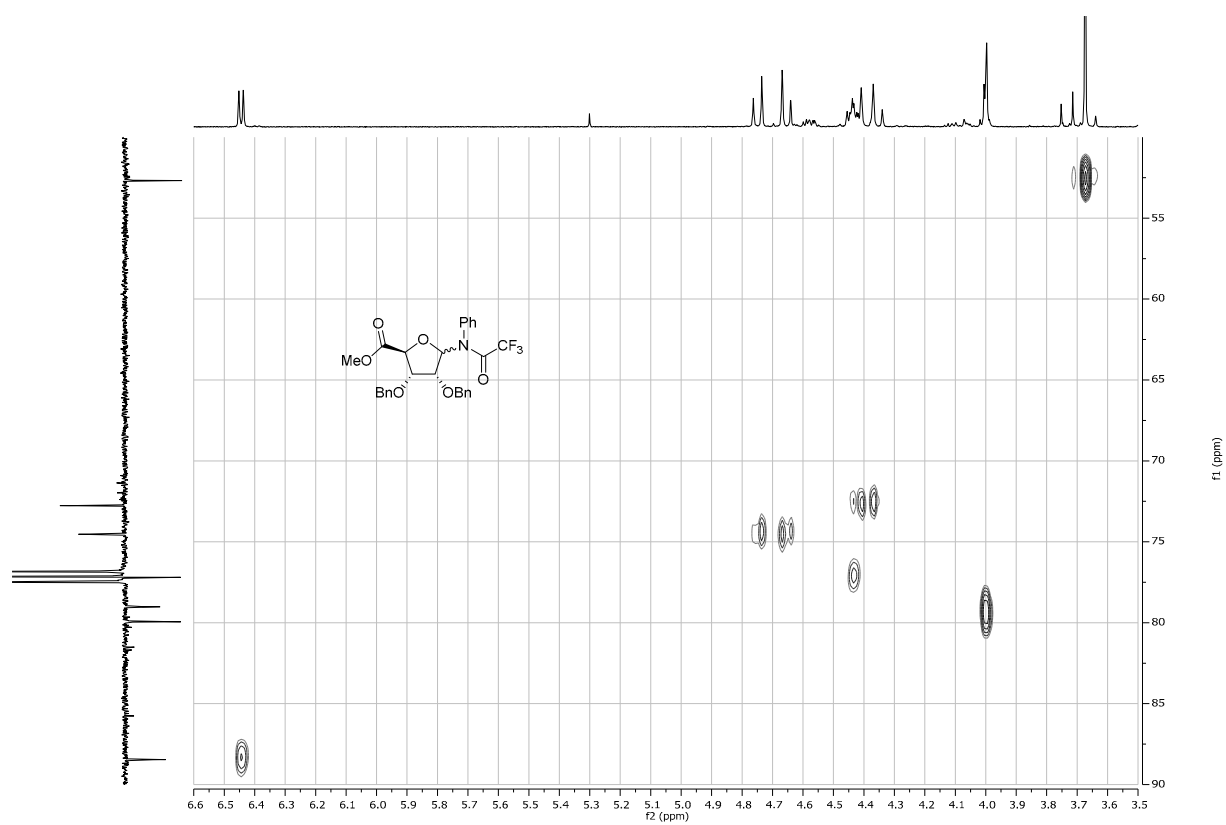

$^1\text{H}$ - $^1\text{H}$  NOESY of compound **99**

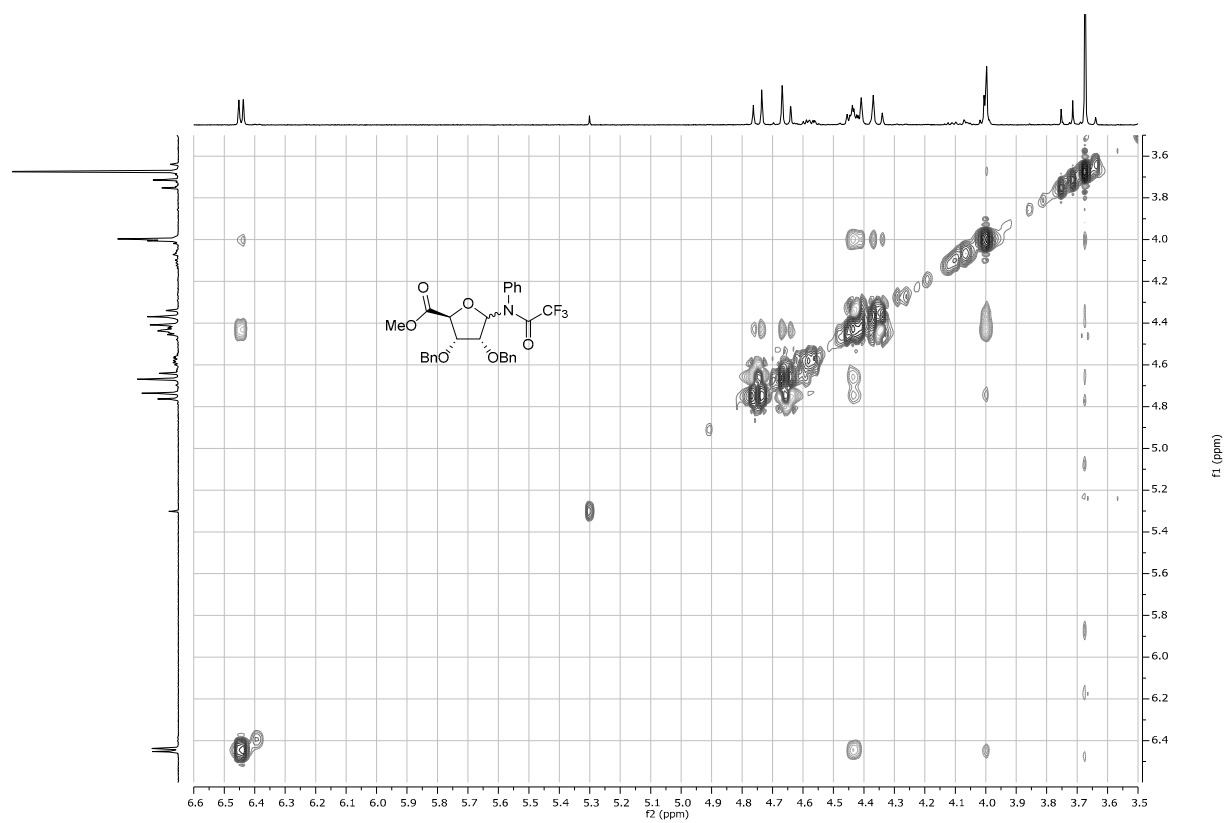

## References in Supporting Information

- [1] P. A. Wender, F. C. Bi, N. Buschmann, F. Gosselin, C. Kan, J.-M. Kee, H. Ohmura, *Org. Lett.* **2006**, *8*, 5373–5376.
- [2] K.-H. Jung, R. R. Schmidt, *Liebigs Ann. Chem.* **1979**, *1979*, 1426–1439.
- [3] A. N. Cuzzupe, R. Di Florio, M. A. Rizzacasa, *J. Org. Chem.* **2002**, *67*, 4392–4398.
- [4] G. H. Veeneman, L. J. F. Gomes, J. H. van Boom, *Tetrahedron* **1989**, *45*, 7433–7448.
- [5] K.-Y. Li, J. Jiang, M. D. Witte, W. W. Kallemeijn, H. van den Elst, C.-S. Wong, S. D. Chander, S. Hoogendoorn, T. J. M. Beenakker, J. D. C. Codée, et al., *Eur. J. Org. Chem.* **2014**, *2014*, 6030–6043.
- [6] C. Jia, Y. Zhang, L.-H. Zhang, P. Sinaÿ, M. Sollogoub, *Carbohydr. Res.* **2006**, *341*, 2135–2144.
- [7] T.-L. Su, R. S. Klein, J. J. Fox, *J. Org. Chem.* **1981**, *46*, 1790–1792.
- [8] C. H. Larsen, B. H. Ridgway, J. T. Shaw, D. M. Smith, K. A. Woerpel, *J. Am. Chem. Soc.* **2005**, *127*, 10879–10884.
- [9] V. Popsavin, S. Grabež, B. Stojanović, M. Popsavin, V. Pejanović, D. Miljković, *Carbohydr. Res.* **1999**, *321*, 110–115.
- [10] T. K. Chakraborty, D. Koley, R. Ravi, V. Krishnakumari, R. Nagaraj, A. Chand Kunwar, *J. Org. Chem.* **2008**, *73*, 8731–8744.
- [11] A. G. Santana, C. G. Francisco, E. Suárez, C. C. González, *J. Org. Chem.* **2010**, *75*, 5371–5374.
- [12] O.-M. Soueidan, B. J. Trayner, T. N. Grant, J. R. Henderson, F. Wuest, F. G. West, C. I. Cheeseman, *Org. Biomol. Chem.* **2015**, *13*, 6511–6521.
- [13] S. Dostie, M. Prévost, P. Mochirian, K. Tanveer, N. Andrella, A. Rostami, G. Tambutet, Y. Guindon, *J. Org. Chem.* **2016**, *81*, 10769–10790.
- [14] C. Hardacre, I. Messina, M. E. Migaud, K. A. Ness, S. E. Norman, *Tetrahedron* **2009**, *65*, 6341–6347.
- [15] M. Murakami, T. Mukaiyama, *Chem. Lett.* **1983**, *12*, 1733–1736.
- [16] J. J. Patroni, R. V. Stick, D. M. G. Tilbrook, B. W. Skelton, A. H. White, *Aust. J. Chem.* **1989**, *42*, 2127–2141.
- [17] R. R. Diaz, C. Rodríguez Melgarejo, I. I. Cubero, M. T. Plaza López-Espinosa, *Carbohydr. Res.* **1997**, *300*, 375–380.
- [18] G. Parmentier, G. Schmitt, F. Dölle, B. Luu, *Tetrahedron* **1994**, *50*, 5361–5368.
- [19] A. Kakefuda, S. Shuto, T. Nagahata, J. Seki, T. Sasaki, A. Matsuda, *Tetrahedron* **1994**, *50*, 10167–10182.
- [20] E. R. van Rijssel, P. van Delft, G. Lodder, H. S. Overkleeft, G. A. van der Marel, D. V. Filippov, J. D. C. Codée, *Angew. Chem. Int. Ed.* **2014**, *53*, 10381–10385.
- [21] Spartan '04, J. Kong, et al. **2004**, Wavefunction Inc.
- [22] Gaussian 03, Revision E.01, Frisch, M. J.; Trucks, G. W.; Schlegel, H. B.; Scuseria, G. E.; Robb, M. A.; Cheeseman, J. R.; Montgomery, Jr., J. A.; Vreven, T.; Kudin, K. N.; Burant, J. C.; Millam, J. M.; Iyengar, S. S.; Tomasi, J.; Barone, V.; Mennucci, B.; Cossi, M.; Scalmani, G.; Rega, N.; Petersson, G. A.; Nakatsuji, H.; Hada, M.; Ehara, M.; Toyota, K.; Fukuda, R.; Hasegawa, J.; Ishida, M.; Nakajima, T.; Honda, Y.; Kitao, O.; Nakai, H.; Klene, M.; Li, X.; Knox, J. E.; Hratchian, H. P.; Cross, J. B.; Bakken, V.; Adamo, C.; Jaramillo, J.; Gomperts, R.; Stratmann, R. E.; Yazyev, O.; Austin, A. J.; Cammi, R.; Pomelli, C.; Ochterski, J. W.; Ayala, P. Y.; Morokuma, K.; Voth, G. A.; Salvador, P.; Dannenberg, J. J.; Zakrzewski, V. G.; Dapprich, S.; Daniels, A. D.; Strain, M. C.; Farkas, O.; Malick, D. K.; Rabuck, A. D.; Raghavachari, K.; Foresman, J. B.; Ortiz, J. V.; Cui, Q.; Baboul, A. G.; Clifford, S.; Cioslowski, J.; Stefanov, B. B.; Liu, G.; Liashenko, A.; Piskorz, P.; Komaromi, I.; Martin, R. L.; Fox, D. J.; Keith, T.; Al-Laham, M. A.; Peng, C. Y.; Nanayakkara, A.; Challacombe, M.; Gill, P. M. W.; Johnson, B.; Chen, W.; Wong, M. W.; Gonzalez, C.; and Pople, J. A.; **2004**, Gaussian, Inc., Wallingford CT.
